# Supplementary material for: High-Throughput and Accurate Determination of Transgene Copy Number and Zygosity in Transgenic Maize: From DNA Extraction to Data Analysis
Source: MDPI journal article supplement (doi:10.3390/ijms222212487), 2021-11-19
Supplement: s1 [file s1]

**Table S1.** The amplified target DNAs of *hmg* gene in 633 maize inbred lines.

| <b>Lines</b> | <b>Sequence</b>                                                                 |
|--------------|---------------------------------------------------------------------------------|
| shen5005     | TTGGACTAGAAATCTCGTGCTGATTAATTGTTTTACGCGTGCGTTTGTGTGGATTGTAGGACAAGGCTCCCTATGTAGC |
| R31          | ATGGACTAGAAATCTCGTGCTGATTAATTGTTTTACGCGTGCGTTTGTGTGGATTGTAGGACAAGGCTCCCTATGTAGC |
| mei68113     | TTGGACTAGAAATCTCGTGCTGATTAATTGTTTTACGCGTGCGTTTGTGTGGATTGTAGGACAAGGCTCCCTATGTAGC |
| qiong51      | TTGGACTAGAAATCTCGTGCTGATTAATTGTTTTACGCGTGCGTTTGTGTGGATTGTAGGACAAGGCTCCCTATGTAGC |
| 757          | TTGGACTAGAAATCTCGTGCTGATTAATTGTTTTACGCGTGCGTTTGTGTGGATTGTAGGACAAGGCTCCCTATGTAGC |
| DH138        | ATGGACTAGAAATCTCGTGCTGATTAATTGTTTTACGCGTGCGTTTGTGTGGATTGTAGGACAAGGCTCCCTATGTAGC |
| R08          | TTGGACTAGAAATCTCGTGCTGATTAATTGTTTTACGCGTGCGTTTGTGTGGATTGTAGGACAAGGCTCCCTATGTAGC |
| 1145         | TTGGACTAGAAATCTCGTGCTGATTAATTGTTTTACGCGTGCGTTTGTGTGGATTGTAGGACAAGGCTCCCTATGTAGC |
| N138         | ATGGACTAGAAATCTCGTGCTGATTAATTGTTTTACGCGTGCGTTTGTGTGGATTGTAGGACAAGGCTCCCTATGTAGC |
| E600         | TTGGACTAGAAATCTCGTGCTGATTAATTGTTTTACGCGTGCGTTTGTGTGGATTGTAGGACAAGGCTCCCTATGTAGC |
| L061F        | TTGGACTAGAAATCTCGTGCTGATTAATTGTTTTACGCGTGCGTTTGTGTGGATTGTAGGACAAGGCTCCCTATGTAGC |
| F7584        | TTGGACTAGAAATCTCGTGCTGATTAATTGTTTTACGCGTGCGTTTGTGTGGATTGTAGGACAAGGCTCCCTATGTAGC |
| DM101B       | TTGGACTAGAAATCTCGTGCTGATTAATTGTTTTACGCGTGCGTTTGTGTGGATTGTAGGACAAGGCTCCCTATGTAGC |
| D619         | TTGGACTAGAAATCTCGTGCTGATTAATTGTTTTACGCGTGCGTTTGTGTGGATTGTAGGACAAGGCTCCCTATGTAGC |
| D15          | TTGGACTAGAAATCTCGTGCTGATTAATTGTTTTACGCGTGCGTTTGTGTGGATTGTAGGACAAGGCTCCCTATGTAGC |
| DM07         | TTGGACTAGAAATCTCGTGCTGATTAATTGTTTTACGCGTGCGTTTGTGTGGATTGTAGGACAAGGCTCCCTATGTAGC |
| SC24-1       | TTGGACTAGAAATCTCGTGCTGATTAATTGTTTTACGCGTGCGTTTGTGTGGATTGTAGGACAAGGCTCCCTATGTAGC |
| Y223         | TTGGACTAGAAATCTCGTGCTGATTAATTGTTTTACGCGTGCGTTTGTGTGGATTGTAGGACAAGGCTCCCTATGTAGC |
| C521         | TTGGACTAGAAATCTCGTGCTGATTAATTGTTTTACGCGTGCGTTTGTGTGGATTGTAGGACAAGGCTCCCTATGTAGC |
| LM-2         | TTGGACTAGAAATCTCGTGCTGATTAATTGTTTTACGCGTGCGTTTGTGTGGATTGTAGGACAAGGCTCCCTATGTAGC |
| B100         | ATGGACTAGAAATCTCGTGCTGATTAATTGTTTTACGCGTGCGTTTGTGTGGATTGTAGGACAAGGCTCCCTATGTAGC |

| Lines       | Sequence                                                                        |
|-------------|---------------------------------------------------------------------------------|
| B98         | ATGGACTAGAAATCTCGTGCTGATTAATTGTTTTACGCGTGCGTTTGTGTGGATTGTAGGACAAGGCTCCCTATGTAGC |
| B95         | TTGGACTAGAAATCTCGTGCTGATTAATTGTTTTACGCGTGCGTTTGTGTGGATTGTAGGACAAGGCTCCCTATGTAGC |
| SC-9        | TTGGACTAGAAATCTCGTGCTGATTAATTGTTTTACGCGTGCGTTTGTGTGGATTGTAGGACAAGGCTCCCTATGTAGC |
| 4003        | TTGGACTAGAAATCTCGTGCTGATTAATTGTTTTACGCGTGCGTTTGTGTGGATTGTAGGACAAGGCTCCCTATGTAGC |
| lian87      | TTGGACTAGAAATCTCGTGCTGATTAATTGTTTTACGCGTGCGTTTGTGTGGATTGTAGGACAAGGCTCCCTATGTAGC |
| PN2-8       | TTGGACTAGAAATCTCGTGCTGATTAATTGTTTTACGCGTGCGTTTGTGTGGATTGTAGGACAAGGCTCCCTATGTAGC |
| L-1         | ATGGACTAGAAATCTCGTGCTGATTAATTGTTTTACGCGTGCGTTTGTGTGGATTGTAGGACAAGGCTCCCTATGTAGC |
| W172        | TTGGACTAGAAATCTCGTGCTGATTAATTGTTTTACGCGTGCGTTTGTGTGGATTGTAGGACAAGGCTCCCTATGTAGC |
| SW153       | TTGGACTAGAAATCTCGTGCTGATTAATTGTTTTACGCGTGCGTTTGTGTGGATTGTAGGACAAGGCTCCCTATGTAGC |
| W238        | TTGGACTAGAAATCTCGTGCTGATTAATTGTTTTACGCGTGCGTTTGTGTGGATTGTAGGACAAGGCTCCCTATGTAGC |
| W968        | ATGGACTAGAAATCTCGTGCTGATTAATTGTTTTACGCGTGCGTTTGTGTGGATTGTAGGACAAGGCTCCCTATGTAGC |
| WB8         | ATGGACTAGAAATCTCGTGCTGATTAATTGTTTTACGCGTGCGTTTGTGTGGATTGTAGGACAAGGCTCCCTATGTAGC |
| 18          | TTGGACTAGAAATCTCGTGCTGATTAATTGTTTTACGCGTGCGTTTGTGTGGATTGTAGGACAAGGCTCCCTATGTAGC |
| 1614        | TTGGACTAGAAATCTCGTGCTGATTAATTGTTTTACGCGTGCGTTTGTGTGGATTGTAGGACAAGGCTCCCTATGTAGC |
| 1610        | TTGGACTAGAAATCTCGTGCTGATTAATTGTTTTACGCGTGCGTTTGTGTGGATTGTAGGACAAGGCTCCCTATGTAGC |
| 5-Apr       | TTGGACTAGAAATCTCGTGCTGATTAATTGTTTTACGCGTGCGTTTGTGTGGATTGTAGGACAAGGCTCCCTATGTAGC |
| chen322     | TTGGACTAGAAATCTCGTGCTGATTAATTGTTTTACGCGTGCGTTTGTGTGGATTGTAGGACAAGGCTCCCTATGTAGC |
| E601        | TTGGACTAGAAATCTCGTGCTGATTAATTGTTTTACGCGTGCGTTTGTGTGGATTGTAGGACAAGGCTCCCTATGTAGC |
| E588        | TTGGACTAGAAATCTCGTGCTGATTAATTGTTTTACGCGTGCGTTTGTGTGGATTGTAGGACAAGGCTCCCTATGTAGC |
| B394        | TTGGACTAGAAATCTCGTGCTGATTAATTGTTTTACGCGTGCGTTTGTGTGGATTGTAGGACAAGGCTCCCTATGTAGC |
| changK      | TTGGACTAGAAATCTCGTGCTGATTAATTGTTTTACGCGTGCGTTTGTGTGGATTGTAGGACAAGGCTCCCTATGTAGC |
| huangchanga | TTGGACTAGAAATCTCGTGCTGATTAATTGTTTTACGCGTGCGTTTGTGTGGATTGTAGGACAAGGCTCCCTATGTAGC |

| Lines       | Sequence                                                                        |
|-------------|---------------------------------------------------------------------------------|
| 953         | TTGGACTAGAAATCTCGTGCTGATTAATTGTTTTACGCGTGCGTTTGTGTGGATTGTAGGACAAGGCTCCCTATGTAGC |
| D33A        | ATGGACTAGAAATCTCGTGCTGATTAATTGTTTTACGCGTGCGTTTGTGTGGATTGTAGGACAAGGCTCCCTATGTAGC |
| huangchangb | TTGGACTAGAAATCTCGTGCTGATTAATTGTTTTACGCGTGCGTTTGTGTGGATTGTAGGACAAGGCTCCCTATGTAGC |
| W499        | TTGGACTAGAAATCTCGTGCTGATTAATTGTTTTACGCGTGCGTTTGTGTGGATTGTAGGACAAGGCTCCCTATGTAGC |
| 624         | TTGGACTAGAAATCTCGTGCTGATTAATTGTTTTACGCGTGCGTTTGTGTGGATTGTAGGACAAGGCTCCCTATGTAGC |
| SC30-1      | ATGGACTAGAAATCTCGTGCTGATTAATTGTTTTACGCGTGCGTTTGTGTGGATTGTAGGACAAGGCTCCCTATGTAGC |
| 468-3       | TTGGACTAGAAATCTCGTGCTGATTAATTGTTTTACGCGTGCGTTTGTGTGGATTGTAGGACAAGGCTCCCTATGTAGC |
| XF223       | ATGGACTAGAAATCTCGTGCTGATTAATTGTTTTACGCGTGCGTTTGTGTGGATTGTAGGACAAGGCTCCCTATGTAGC |
| XF134       | TTGGACTAGAAATCTCGTGCTGATTAATTGTTTTACGCGTGCGTTTGTGTGGATTGTAGGACAAGGCTCCCTATGTAGC |
| M131-5      | TTGGACTAGAAATCTCGTGCTGATTAATTGTTTTACGCGTGCGTTTGTGTGGATTGTAGGACAAGGCTCCCTATGTAGC |
| XOP2        | TTGGACTAGAAATCTCGTGCTGATTAATTGTTTTACGCGTGCGTTTGTGTGGATTGTAGGACAAGGCTCCCTATGTAGC |
| R1656       | TTGGACTAGAAATCTCGTGCTGATTAATTGTTTTACGCGTGCGTTTGTGTGGATTGTAGGACAAGGCTCCCTATGTAGC |
| jian1495b   | TTGGACTAGAAATCTCGTGCTGATTAATTGTTTTACGCGTGCGTTTGTGTGGATTGTAGGACAAGGCTCCCTATGTAGC |
| Max         | ATGGACTAGAAATCTCGTGCTGATTAATTGTTTTACGCGTGCGTTTGTGTGGATTGTAGGACAAGGCTCCCTATGTAGC |
| T24         | ATGGACTAGAAATCTCGTGCTGATTAATTGTTTTACGCGTGCGTTTGTGTGGATTGTAGGACAAGGCTCCCTATGTAGC |
| Lo415       | TTGGACTAGAAATCTCGTGCTGATTAATTGTTTTACGCGTGCGTTTGTGTGGATTGTAGGACAAGGCTCCCTATGTAGC |
| chang7-2    | TTGGACTAGAAATCTCGTGCTGATTAATTGTTTTACGCGTGCGTTTGTGTGGATTGTAGGACAAGGCTCCCTATGTAGC |
| FC-13       | TTGGACTAGAAATCTCGTGCTGATTAATTGTTTTACGCGTGCGTTTGTGTGGATTGTAGGACAAGGCTCCCTATGTAGC |
| L05-6       | TTGGACTAGAAATCTCGTGCTGATTAATTGTTTTACGCGTGCGTTTGTGTGGATTGTAGGACAAGGCTCCCTATGTAGC |
| ys06        | TTGGACTAGAAATCTCGTGCTGATTAATTGTTTTACGCGTGCGTTTGTGTGGATTGTAGGACAAGGCTCCCTATGTAGC |
| L473        | TTGGACTAGAAATCTCGTGCTGATTAATTGTTTTACGCGTGCGTTTGTGTGGATTGTAGGACAAGGCTCCCTATGTAGC |
| equn3       | ATGGACTAGAAATCTCGTGCTGATTAATTGTTTTACGCGTGCGTTTGTGTGGATTGTAGGACAAGGCTCCCTATGTAGC |

| Lines         | Sequence                                                                        |
|---------------|---------------------------------------------------------------------------------|
| equn4         | TTGGACTAGAAATCTCGTGCTGATTAATTGTTTTACGCGTGCGTTTGTGTGGATTGTAGGACAAGGCTCCCTATGTAGC |
| 18-599        | TTGGACTAGAAATCTCGTGCTGATTAATTGTTTTACGCGTGCGTTTGTGTGGATTGTAGGACAAGGCTCCCTATGTAGC |
| 08-64         | TTGGACTAGAAATCTCGTGCTGATTAATTGTTTTACGCGTGCGTTTGTGTGGATTGTAGGACAAGGCTCCCTATGTAGC |
| dong327       | ATGGACTAGAAATCTCGTGCTGATTAATTGTTTTACGCGTGCGTTTGTGTGGATTGTAGGACAAGGCTCCCTATGTAGC |
| K10           | TTGGACTAGAAATCTCGTGCTGATTAATTGTTTTACGCGTGCGTTTGTGTGGATTGTAGGACAAGGCTCCCTATGTAGC |
| ji444         | TTGGACTAGAAATCTCGTGCTGATTAATTGTTTTACGCGTGCGTTTGTGTGGATTGTAGGACAAGGCTCCCTATGTAGC |
| ben7884       | TTGGACTAGAAATCTCGTGCTGATTAATTGTTTTACGCGTGCGTTTGTGTGGATTGTAGGACAAGGCTCCCTATGTAGC |
| huangyesi3    | ATGGACTAGAAATCTCGTGCTGATTAATTGTTTTACGCGTGCGTTTGTGTGGATTGTAGGACAAGGCTCCCTATGTAGC |
| ji63          | TTGGACTAGAAATCTCGTGCTGATTAATTGTTTTACGCGTGCGTTTGTGTGGATTGTAGGACAAGGCTCCCTATGTAGC |
| ji846         | TTGGACTAGAAATCTCGTGCTGATTAATTGTTTTACGCGTGCGTTTGTGTGGATTGTAGGACAAGGCTCCCTATGTAGC |
| H21           | TTGGACTAGAAATCTCGTGCTGATTAATTGTTTTACGCGTGCGTTTGTGTGGATTGTAGGACAAGGCTCCCTATGTAGC |
| 4F1           | TTGGACTAGAAATCTCGTGCTGATTAATTGTTTTACGCGTGCGTTTGTGTGGATTGTAGGACAAGGCTCCCTATGTAGC |
| ji4112        | TTGGACTAGAAATCTCGTGCTGATTAATTGTTTTACGCGTGCGTTTGTGTGGATTGTAGGACAAGGCTCCCTATGTAGC |
| xi502         | TTGGACTAGAAATCTCGTGCTGATTAATTGTTTTACGCGTGCGTTTGTGTGGATTGTAGGACAAGGCTCCCTATGTAGC |
| wenhuang31413 | TTGGACTAGAAATCTCGTGCTGATTAATTGTTTTACGCGTGCGTTTGTGTGGATTGTAGGACAAGGCTCCCTATGTAGC |
| S22           | TTGGACTAGAAATCTCGTGCTGATTAATTGTTTTACGCGTGCGTTTGTGTGGATTGTAGGACAAGGCTCCCTATGTAGC |
| ye8112        | TTGGACTAGAAATCTCGTGCTGATTAATTGTTTTACGCGTGCGTTTGTGTGGATTGTAGGACAAGGCTCCCTATGTAGC |
| zheng653      | TTGGACTAGAAATCTCGTGCTGATTAATTGTTTTACGCGTGCGTTTGTGTGGATTGTAGGACAAGGCTCCCTATGTAGC |
| tian77        | TTGGACTAGAAATCTCGTGCTGATTAATTGTTTTACGCGTGCGTTTGTGTGGATTGTAGGACAAGGCTCCCTATGTAGC |
| tie7922       | TTGGACTAGAAATCTCGTGCTGATTAATTGTTTTACGCGTGCGTTTGTGTGGATTGTAGGACAAGGCTCCCTATGTAGC |
| ye488         | TTGGACTAGAAATCTCGTGCTGATTAATTGTTTTACGCGTGCGTTTGTGTGGATTGTAGGACAAGGCTCCCTATGTAGC |
| chang72       | TTGGACTAGAAATCTCGTGCTGATTAATTGTTTTACGCGTGCGTTTGTGTGGATTGTAGGACAAGGCTCCCTATGTAGC |

| Lines      | Sequence                                                                        |
|------------|---------------------------------------------------------------------------------|
| wu109      | TTGGACTAGAAATCTCGTGCTGATTAATTGTTTTACGCGTGCGTTTGTGTGGATTGTAGGACAAGGCTCCCTATGTAGC |
| lv28       | TTGGACTAGAAATCTCGTGCTGATTAATTGTTTTACGCGTGCGTTTGTGTGGATTGTAGGACAAGGCTCCCTATGTAGC |
| qi205      | TTGGACTAGAAATCTCGTGCTGATTAATTGTTTTACGCGTGCGTTTGTGTGGATTGTAGGACAAGGCTCCCTATGTAGC |
| D854       | TTGGACTAGAAATCTCGTGCTGATTAATTGTTTTACGCGTGCGTTTGTGTGGATTGTAGGACAAGGCTCCCTATGTAGC |
| D857       | TTGGACTAGAAATCTCGTGCTGATTAATTGTTTTACGCGTGCGTTTGTGTGGATTGTAGGACAAGGCTCCCTATGTAGC |
| D856       | ATGGACTAGAAATCTCGTGCTGATTAATTGTTTTACGCGTGCGTTTGTGTGGATTGTAGGACAAGGCTCCCTATGTAGC |
| D864       | TTGGACTAGAAATCTCGTGCTGATTAATTGTTTTACGCGTGCGTTTGTGTGGATTGTAGGACAAGGCTCCCTATGTAGC |
| D869       | ATGGACTAGAAATCTCGTGCTGATTAATTGTTTTACGCGTGCGTTTGTGTGGATTGTAGGACAAGGCTCCCTATGTAGC |
| D883       | TTGGACTAGAAATCTCGTGCTGATTAATTGTTTTACGCGTGCGTTTGTGTGGATTGTAGGACAAGGCTCCCTATGTAGC |
| D886       | TTGGACTAGAAATCTCGTGCTGATTAATTGTTTTACGCGTGCGTTTGTGTGGATTGTAGGACAAGGCTCCCTATGTAGC |
| D1049      | TTGGACTAGAAATCTCGTGCTGATTAATTGTTTTACGCGTGCGTTTGTGTGGATTGTAGGACAAGGCTCCCTATGTAGC |
| D1051      | TTGGACTAGAAATCTCGTGCTGATTAATTGTTTTACGCGTGCGTTTGTGTGGATTGTAGGACAAGGCTCCCTATGTAGC |
| dan9064    | TTGGACTAGAAATCTCGTGCTGATTAATTGTTTTACGCGTGCGTTTGTGTGGATTGTAGGACAAGGCTCCCTATGTAGC |
| 3H2        | TTGGACTAGAAATCTCGTGCTGATTAATTGTTTTACGCGTGCGTTTGTGTGGATTGTAGGACAAGGCTCCCTATGTAGC |
| yu87-1     | TTGGACTAGAAATCTCGTGCTGATTAATTGTTTTACGCGTGCGTTTGTGTGGATTGTAGGACAAGGCTCCCTATGTAGC |
| nan21-3    | TTGGACTAGAAATCTCGTGCTGATTAATTGTTTTACGCGTGCGTTTGTGTGGATTGTAGGACAAGGCTCCCTATGTAGC |
| K14        | TTGGACTAGAAATCTCGTGCTGATTAATTGTTTTACGCGTGCGTTTGTGTGGATTGTAGGACAAGGCTCCCTATGTAGC |
| cheng698-3 | TTGGACTAGAAATCTCGTGCTGATTAATTGTTTTACGCGTGCGTTTGTGTGGATTGTAGGACAAGGCTCCCTATGTAGC |
| ye52106    | TTGGACTAGAAATCTCGTGCTGATTAATTGTTTTACGCGTGCGTTTGTGTGGATTGTAGGACAAGGCTCCCTATGTAGC |
| ye8001     | TTGGACTAGAAATCTCGTGCTGATTAATTGTTTTACGCGTGCGTTTGTGTGGATTGTAGGACAAGGCTCCCTATGTAGC |
| suwan1611  | ATGGACTAGAAATCTCGTGCTGATTAATTGTTTTACGCGTGCGTTTGTGTGGATTGTAGGACAAGGCTCCCTATGTAGC |
| dan599     | TTGGACTAGAAATCTCGTGCTGATTAATTGTTTTACGCGTGCGTTTGTGTGGATTGTAGGACAAGGCTCCCTATGTAGC |

| Lines      | Sequence                                                                        |
|------------|---------------------------------------------------------------------------------|
| D892       | TTGGACTAGAAATCTCGTGCTGATTAATTGTTTTACGCGTGCGTTTGTGTGGATTGTAGGACAAGGCTCCCTATGTAGC |
| su75       | TTGGACTAGAAATCTCGTGCTGATTAATTGTTTTACGCGTGCGTTTGTGTGGATTGTAGGACAAGGCTCCCTATGTAGC |
| R136       | TTGGACTAGAAATCTCGTGCTGATTAATTGTTTTACGCGTGCGTTTGTGTGGATTGTAGGACAAGGCTCCCTATGTAGC |
| R017       | TTGGACTAGAAATCTCGTGCTGATTAATTGTTTTACGCGTGCGTTTGTGTGGATTGTAGGACAAGGCTCCCTATGTAGC |
| 3489a      | TTGGACTAGAAATCTCGTGCTGATTAATTGTTTTACGCGTGCGTTTGTGTGGATTGTAGGACAAGGCTCCCTATGTAGC |
| P138       | TTGGACTAGAAATCTCGTGCTGATTAATTGTTTTACGCGTGCGTTTGTGTGGATTGTAGGACAAGGCTCCCTATGTAGC |
| N68a       | TTGGACTAGAAATCTCGTGCTGATTAATTGTTTTACGCGTGCGTTTGTGTGGATTGTAGGACAAGGCTCCCTATGTAGC |
| K12        | TTGGACTAGAAATCTCGTGCTGATTAATTGTTTTACGCGTGCGTTTGTGTGGATTGTAGGACAAGGCTCCCTATGTAGC |
| 619        | TTGGACTAGAAATCTCGTGCTGATTAATTGTTTTACGCGTGCGTTTGTGTGGATTGTAGGACAAGGCTCCCTATGTAGC |
| shen137    | TTGGACTAGAAATCTCGTGCTGATTAATTGTTTTACGCGTGCGTTTGTGTGGATTGTAGGACAAGGCTCCCTATGTAGC |
| 3335       | TTGGACTAGAAATCTCGTGCTGATTAATTGTTTTACGCGTGCGTTTGTGTGGATTGTAGGACAAGGCTCCCTATGTAGC |
| Beck       | TTGGACTAGAAATCTCGTGCTGATTAATTGTTTTACGCGTGCGTTTGTGTGGATTGTAGGACAAGGCTCCCTATGTAGC |
| huangzaosi | TTGGACTAGAAATCTCGTGCTGATTAATTGTTTTACGCGTGCGTTTGTGTGGATTGTAGGACAAGGCTCCCTATGTAGC |
| Maxa       | TTGGACTAGAAATCTCGTGCTGATTAATTGTTTTACGCGTGCGTTTGTGTGGATTGTAGGACAAGGCTCCCTATGTAGC |
| fangyin    | TTGGACTAGAAATCTCGTGCTGATTAATTGTTTTACGCGTGCGTTTGTGTGGATTGTAGGACAAGGCTCCCTATGTAGC |
| 5032       | TTGGACTAGAAATCTCGTGCTGATTAATTGTTTTACGCGTGCGTTTGTGTGGATTGTAGGACAAGGCTCCCTATGTAGC |
| zheng22    | TTGGACTAGAAATCTCGTGCTGATTAATTGTTTTACGCGTGCGTTTGTGTGGATTGTAGGACAAGGCTCCCTATGTAGC |
| 7903E      | TTGGACTAGAAATCTCGTGCTGATTAATTGTTTTACGCGTGCGTTTGTGTGGATTGTAGGACAAGGCTCCCTATGTAGC |
| dan340     | TTGGACTAGAAATCTCGTGCTGATTAATTGTTTTACGCGTGCGTTTGTGTGGATTGTAGGACAAGGCTCCCTATGTAGC |
| 99122      | TTGGACTAGAAATCTCGTGCTGATTAATTGTTTTACGCGTGCGTTTGTGTGGATTGTAGGACAAGGCTCCCTATGTAGC |
| M1016      | ATGGACTAGAAATCTCGTGCTGATTAATTGTTTTACGCGTGCGTTTGTGTGGATTGTAGGACAAGGCTCCCTATGTAGC |
| W9706      | TTGGACTAGAAATCTCGTGCTGATTAATTGTTTTACGCGTGCGTTTGTGTGGATTGTAGGACAAGGCTCCCTATGTAGC |

| Lines        | Sequence                                                                        |
|--------------|---------------------------------------------------------------------------------|
| R25          | TTGGACTAGAAATCTCGTGCTGATTAATTGTTTTACGCGTGCGTTTGTGTGGATTGTAGGACAAGGCTCCCTATGTAGC |
| R150         | TTGGACTAGAAATCTCGTGCTGATTAATTGTTTTACGCGTGCGTTTGTGTGGATTGTAGGACAAGGCTCCCTATGTAGC |
| R98          | TTGGACTAGAAATCTCGTGCTGATTAATTGTTTTACGCGTGCGTTTGTGTGGATTGTAGGACAAGGCTCCCTATGTAGC |
| chengzi2142  | TTGGACTAGAAATCTCGTGCTGATTAATTGTTTTACGCGTGCGTTTGTGTGGATTGTAGGACAAGGCTCCCTATGTAGC |
| xing230      | TTGGACTAGAAATCTCGTGCTGATTAATTGTTTTACGCGTGCGTTTGTGTGGATTGTAGGACAAGGCTCCCTATGTAGC |
| 20564        | ATGGACTAGAAATCTCGTGCTGATTAATTGTTTTACGCGTGCGTTTGTGTGGATTGTAGGACAAGGCTCCCTATGTAGC |
| XF77         | TTGGACTAGAAATCTCGTGCTGATTAATTGTTTTACGCGTGCGTTTGTGTGGATTGTAGGACAAGGCTCCCTATGTAGC |
| huotanghuang | ATGGACTAGAAATCTCGTGCTGATTAATTGTTTTACGCGTGCGTTTGTGTGGATTGTAGGACAAGGCTCCCTATGTAGC |
| SC11-1       | ATGGACTAGAAATCTCGTGCTGATTAATTGTTTTACGCGTGCGTTTGTGTGGATTGTAGGACAAGGCTCCCTATGTAGC |
| 811A         | TTGGACTAGAAATCTCGTGCTGATTAATTGTTTTACGCGTGCGTTTGTGTGGATTGTAGGACAAGGCTCCCTATGTAGC |
| 806A         | TTGGACTAGAAATCTCGTGCTGATTAATTGTTTTACGCGTGCGTTTGTGTGGATTGTAGGACAAGGCTCCCTATGTAGC |
| 9058         | TTGGACTAGAAATCTCGTGCTGATTAATTGTTTTACGCGTGCGTTTGTGTGGATTGTAGGACAAGGCTCCCTATGTAGC |
| PH6WC        | TTGGACTAGAAATCTCGTGCTGATTAATTGTTTTACGCGTGCGTTTGTGTGGATTGTAGGACAAGGCTCCCTATGTAGC |
| PH4CV        | TTGGACTAGAAATCTCGTGCTGATTAATTGTTTTACGCGTGCGTTTGTGTGGATTGTAGGACAAGGCTCCCTATGTAGC |
| hai9-21      | ATGGACTAGAAATCTCGTGCTGATTAATTGTTTTACGCGTGCGTTTGTGTGGATTGTAGGACAAGGCTCCCTATGTAGC |
| DH40         | TTGGACTAGAAATCTCGTGCTGATTAATTGTTTTACGCGTGCGTTTGTGTGGATTGTAGGACAAGGCTCCCTATGTATC |
| BT1          | TTGGACTAGAAATCTCGTGCTGATTAATTGTTTTACGCGTGCGTTTGTGTGGATTGTAGGACAAGGCTCCCTATGTAGC |
| A801         | TTGGACTAGAAATCTCGTGCTGATTAATTGTTTTACGCGTGCGTTTGTGTGGATTGTAGGACAAGGCTCCCTATGTAGC |
| DF20         | TTGGACTAGAAATCTCGTGCTGATTAATTGTTTTACGCGTGCGTTTGTGTGGATTGTAGGACAAGGCTCCCTATGTAGC |
| DF27         | TTGGACTAGAAATCTCGTGCTGATTAATTGTTTTACGCGTGCGTTTGTGTGGATTGTAGGACAAGGCTCCCTATGTAGC |
| DF24         | TTGGACTAGAAATCTCGTGCTGATTAATTGTTTTACGCGTGCGTTTGTGTGGATTGTAGGACAAGGCTCCCTATGTAGC |
| 7236         | TTGGACTAGAAATCTCGTGCTGATTAATTGTTTTACGCGTGCGTTTGTGTGGATTGTAGGACAAGGCTCCCTATGTAGC |

| Lines   | Sequence                                                                        |
|---------|---------------------------------------------------------------------------------|
| 433-7   | TTGGACTAGAAATCTCGTGCTGATTAATTGTTTTACGCGTGCGTTTGTGTGGATTGTAGGACAAGGCTCCCTATGTAGC |
| shen977 | ATGGACTAGAAATCTCGTGCTGATTAATTGTTTTACGCGTGCGTTTGTGTGGATTGTAGGACAAGGCTCCCTATGTAGC |
| K22     | TTGGACTAGAAATCTCGTGCTGATTAATTGTTTTACGCGTGCGTTTGTGTGGATTGTAGGACAAGGCTCCCTATGTAGC |
| niu2-1  | TTGGACTAGAAATCTCGTGCTGATTAATTGTTTTACGCGTGCGTTTGTGTGGATTGTAGGACAAGGCTCCCTATGTAGC |
| 68139   | TTGGACTAGAAATCTCGTGCTGATTAATTGTTTTACGCGTGCGTTTGTGTGGATTGTAGGACAAGGCTCCCTATGTAGC |
| 1313    | ATGGACTAGAAATCTCGTGCTGATTAATTGTTTTACGCGTGCGTTTGTGTGGATTGTAGGACAAGGCTCCCTATGTAGC |
| X178    | TTGGACTAGAAATCTCGTGCTGATTAATTGTTTTACGCGTGCGTTTGTGTGGATTGTAGGACAAGGCTCCCTATGTAGC |
| 150-4   | TTGGACTAGAAATCTCGTGCTGATTAATTGTTTTACGCGTGCGTTTGTGTGGATTGTAGGACAAGGCTCCCTATGTAGC |
| P007    | TTGGACTAGAAATCTCGTGCTGATTAATTGTTTTACGCGTGCGTTTGTGTGGATTGTAGGACAAGGCTCCCTATGTAGC |
| y9961   | TTGGACTAGAAATCTCGTGCTGATTAATTGTTTTACGCGTGCGTTTGTGTGGATTGTAGGACAAGGCTCCCTATGTAGC |
| Yd6     | TTGGACTAGAAATCTCGTGCTGATTAATTGTTTTACGCGTGCGTTTGTGTGGATTGTAGGACAAGGCTCCCTATGTAGC |
| 196     | TTGGACTAGAAATCTCGTGCTGATTAATTGTTTTACGCGTGCGTTTGTGTGGATTGTAGGACAAGGCTCCCTATGTAGC |
| 68122   | ATGGACTAGAAATCTCGTGCTGATTAATTGTTTTACGCGTGCGTTTGTGTGGATTGTAGGACAAGGCTCCCTATGTAGC |
| shen142 | TTGGACTAGAAATCTCGTGCTGATTAATTGTTTTACGCGTGCGTTTGTGTGGATTGTAGGACAAGGCTCCCTATGTAGC |
| M22     | TTGGACTAGAAATCTCGTGCTGATTAATTGTTTTACGCGTGCGTTTGTGTGGATTGTAGGACAAGGCTCCCTATGTAGC |
| shan89  | ATGGACTAGAAATCTCGTGCTGATTAATTGTTTTACGCGTGCGTTTGTGTGGATTGTAGGACAAGGCTCCCTATGTAGC |
| 8701    | TTGGACTAGAAATCTCGTGCTGATTAATTGTTTTACGCGTGCGTTTGTGTGGATTGTAGGACAAGGCTCCCTATGTAGC |
| 1121    | TTGGACTAGAAATCTCGTGCTGATTAATTGTTTTACGCGTGCGTTTGTGTGGATTGTAGGACAAGGCTCCCTATGTAGC |
| dan598  | TTGGACTAGAAATCTCGTGCTGATTAATTGTTTTACGCGTGCGTTTGTGTGGATTGTAGGACAAGGCTCCCTATGTAGC |
| Ay420   | TTGGACTAGAAATCTCGTGCTGATTAATTGTTTTACGCGTGCGTTTGTGTGGATTGTAGGACAAGGCTCCCTATGTAGC |
| A632    | TTGGACTAGAAATCTCGTGCTGATTAATTGTTTTACGCGTGCGTTTGTGTGGATTGTAGGACAAGGCTCCCTATGTAGC |
| Mo24W   | ATGGACTAGAAATCTCGTGCTGATTAATTGTTTTACGCGTGCGTTTGTGTGGATTGTAGGACAAGGCTCCCTATGTAGC |



| Lines        | Sequence                                                                        |
|--------------|---------------------------------------------------------------------------------|
| A679         | TTGGACTAGAAATCTCGTGCTGATTAATTGTTTTACGCGTGCGTTTGTGTGGATTGTAGGACAAGGCTCCCTATGTAGC |
| Sg1533       | ATGGACTAGAAATCTCGTGCTGATTAATTGTTTTACGCGTGCGTTTGTGTGGATTGTAGGACAAGGCTCCCTATGTAGC |
| Va26         | TTGGACTAGAAATCTCGTGCTGATTAATTGTTTTACGCGTGCGTTTGTGTGGATTGTAGGACAAGGCTCCCTATGTAGC |
| W64A         | TTGGACTAGAAATCTCGTGCTGATTAATTGTTTTACGCGTGCGTTTGTGTGGATTGTAGGACAAGGCTCCCTATGTAGC |
| W153R        | TTGGACTAGAAATCTCGTGCTGATTAATTGTTTTACGCGTGCGTTTGTGTGGATTGTAGGACAAGGCTCCCTATGTAGC |
| 4722         | TTGGACTAGAAATCTCGTGCTGATTAATTGTTTTACGCGTGCGTTTGTGTGGATTGTAGGACAAGGCTCCCTATGTAGC |
| W2H03        | ATGGACTAGAAATCTCGTGCTGATTAATTGTTTTACGCGTGCGTTTGTGTGGATTGTAGGACAAGGCTCCCTATGTAGC |
| bao3040      | TTGGACTAGAAATCTCGTGCTGATTAATTGTTTTACGCGTGCGTTTGTGTGGATTGTAGGACAAGGCTCCCTATGTAGC |
| S311         | TTGGACTAGAAATCTCGTGCTGATTAATTGTTTTACGCGTGCGTTTGTGTGGATTGTAGGACAAGGCTCCCTATGTAGC |
| 7 月 1 日      | TTGGACTAGAAATCTCGTGCTGATTAATTGTTTTACGCGTGCGTTTGTGTGGATTGTAGGACAAGGCTCCCTATGTAGC |
| xun92-8      | TTGGACTAGAAATCTCGTGCTGATTAATTGTTTTACGCGTGCGTTTGTGTGGATTGTAGGACAAGGCTCCCTATGTAGC |
| CT109        | ATGGACTAGAAATCTCGTGCTGATTAATTGTTTTACGCGTGCGTTTGTGTGGATTGTAGGACAAGGCTCCCTATGTAGC |
| Lx9801       | TTGGACTAGAAATCTCGTGCTGATTAATTGTTTTACGCGTGCGTTTGTGTGGATTGTAGGACAAGGCTCCCTATGTAGC |
| zhong128     | ATGGACTAGAAATCTCGTGCTGATTAATTGTTTTACGCGTGCGTTTGTGTGGATTGTAGGACAAGGCTCCCTATGTAGC |
| zhonghuang64 | TTGGACTAGAAATCTCGTGCTGATTAATTGTTTTACGCGTGCGTTTGTGTGGATTGTAGGACAAGGCTCCCTATGTAGC |
| han49        | TTGGACTAGAAATCTCGTGCTGATTAATTGTTTTACGCGTGCGTTTGTGTGGATTGTAGGACAAGGCTCCCTATGTAGC |
| ziyu3        | ATGGACTAGAAATCTCGTGCTGATTAATTGTTTTACGCGTGCGTTTGTGTGGATTGTAGGACAAGGCTCCCTATGTAGC |
| guangyou5    | ATGGACTAGAAATCTCGTGCTGATTAATTGTTTTACGCGTGCGTTTGTGTGGATTGTAGGACAAGGCTCCCTATGTAGC |
| daMO         | TTGGACTAGAAATCTCGTGCTGATTAATTGTTTTACGCGTGCGTTTGTGTGGATTGTAGGACAAGGCTCCCTATGTAGC |
| yi67         | TTGGACTAGAAATCTCGTGCTGATTAATTGTTTTACGCGTGCGTTTGTGTGGATTGTAGGACAAGGCTCCCTATGTAGC |
| Lo1125       | ATGGACTAGAAATCTCGTGCTGATTAATTGTTTTACGCGTGCGTTTGTGTGGATTGTAGGACAAGGCTCCCTATGTAGC |
| CN165        | TTGGACTAGAAATCTCGTGCTGATTAATTGTTTTACGCGTGCGTTTGTGTGGATTGTAGGACAAGGCTCCCTATGTAGC |

| Lines       | Sequence                                                                        |
|-------------|---------------------------------------------------------------------------------|
| ji432       | TTGGACTAGAAATCTCGTGCTGATTAATTGTTTTACGCGTGCGTTTGTGTGGATTGTAGGACAAGGCTCCCTATGTAGC |
| cheng18     | TTGGACTAGAAATCTCGTGCTGATTAATTGTTTTACGCGTGCGTTTGTGTGGATTGTAGGACAAGGCTCCCTATGTAGC |
| 82huangzao4 | TTGGACTAGAAATCTCGTGCTGATTAATTGTTTTACGCGTGCGTTTGTGTGGATTGTAGGACAAGGCTCCCTATGTAGC |
| 91huang15   | TTGGACTAGAAATCTCGTGCTGATTAATTGTTTTACGCGTGCGTTTGTGTGGATTGTAGGACAAGGCTCCCTATGTAGC |
| Hda-5       | TTGGACTAGAAATCTCGTGCTGATTAATTGTTTTACGCGTGCGTTTGTGTGGATTGTAGGACAAGGCTCCCTATGTAGC |
| chaoxianbai | TTGGACTAGAAATCTCGTGCTGATTAATTGTTTTACGCGTGCGTTTGTGTGGATTGTAGGACAAGGCTCCCTATGTAGC |
| B12         | TTGGACTAGAAATCTCGTGCTGATTAATTGTTTTACGCGTGCGTTTGTGTGGATTGTAGGACAAGGCTCCCTATGTAGC |
| liao2202    | TTGGACTAGAAATCTCGTGCTGATTAATTGTTTTACGCGTGCGTTTGTGTGGATTGTAGGACAAGGCTCCCTATGTAGC |
| liao2204    | TTGGACTAGAAATCTCGTGCTGATTAATTGTTTTACGCGTGCGTTTGTGTGGATTGTAGGACAAGGCTCCCTATGTAGC |
| liao7794    | TTGGACTAGAAATCTCGTGCTGATTAATTGTTTTACGCGTGCGTTTGTGTGGATTGTAGGACAAGGCTCCCTATGTAGC |
| liao5110    | TTGGACTAGAAATCTCGTGCTGATTAATTGTTTTACGCGTGCGTTTGTGTGGATTGTAGGACAAGGCTCCCTATGTAGC |
| jiu22       | TTGGACTAGAAATCTCGTGCTGATTAATTGTTTTACGCGTGCGTTTGTGTGGATTGTAGGACAAGGCTCCCTATGTAGC |
| 444         | TTGGACTAGAAATCTCGTGCTGATTAATTGTTTTACGCGTGCGTTTGTGTGGATTGTAGGACAAGGCTCCCTATGTAGC |
| D801        | TTGGACTAGAAATCTCGTGCTGATTAATTGTTTTACGCGTGCGTTTGTGTGGATTGTAGGACAAGGCTCCCTATGTAGC |
| 96201       | TTGGACTAGAAATCTCGTGCTGATTAATTGTTTTACGCGTGCGTTTGTGTGGATTGTAGGACAAGGCTCCCTATGTAGC |
| gan41       | TTGGACTAGAAATCTCGTGCTGATTAATTGTTTTACGCGTGCGTTTGTGTGGATTGTAGGACAAGGCTCCCTATGTAGC |
| fu8701      | TTGGACTAGAAATCTCGTGCTGATTAATTGTTTTACGCGTGCGTTTGTGTGGATTGTAGGACAAGGCTCCCTATGTAGC |
| lu65        | TTGGACTAGAAATCTCGTGCTGATTAATTGTTTTACGCGTGCGTTTGTGTGGATTGTAGGACAAGGCTCCCTATGTAGC |
| yan38       | TTGGACTAGAAATCTCGTGCTGATTAATTGTTTTACGCGTGCGTTTGTGTGGATTGTAGGACAAGGCTCCCTATGTAGC |
| yan156      | ATGGACTAGAAATCTCGTGCTGATTAATTGTTTTACGCGTGCGTTTGTGTGGATTGTAGGACAAGGCTCCCTATGTAGC |
| yan103      | TTGGACTAGAAATCTCGTGCTGATTAATTGTTTTACGCGTGCGTTTGTGTGGATTGTAGGACAAGGCTCCCTATGTAGC |
| qi35        | TTGGACTAGAAATCTCGTGCTGATTAATTGTTTTACGCGTGCGTTTGTGTGGATTGTAGGACAAGGCTCCCTATGTAGC |

| Lines         | Sequence                                                                        |
|---------------|---------------------------------------------------------------------------------|
| 200-24-13413  | ATGGACTAGAAATCTCGTGCTGATTAATTGTTTTACGCGTGCGTTTGTGTGGATTGTAGGACAAGGCTCCCTATGTAGC |
| guan17-1      | TTGGACTAGAAATCTCGTGCTGATTAATTGTTTTACGCGTGCGTTTGTGTGGATTGTAGGACAAGGCTCCCTATGTAGC |
| zhengbai11    | TTGGACTAGAAATCTCGTGCTGATTAATTGTTTTACGCGTGCGTTTGTGTGGATTGTAGGACAAGGCTCCCTATGTAGC |
| jiao05        | TTGGACTAGAAATCTCGTGCTGATTAATTGTTTTACGCGTGCGTTTGTGTGGATTGTAGGACAAGGCTCCCTATGTAGC |
| 6             | TTGGACTAGAAATCTCGTGCTGATTAATTGTTTTACGCGTGCGTTTGTGTGGATTGTAGGACAAGGCTCCCTATGTAGC |
| baiU8112      | TTGGACTAGAAATCTCGTGCTGATTAATTGTTTTACGCGTGCGTTTGTGTGGATTGTAGGACAAGGCTCCCTATGTAGC |
| chang7daxian1 | TTGGACTAGAAATCTCGTGCTGATTAATTGTTTTACGCGTGCGTTTGTGTGGATTGTAGGACAAGGCTCCCTATGTAGC |
| 897           | TTGGACTAGAAATCTCGTGCTGATTAATTGTTTTACGCGTGCGTTTGTGTGGATTGTAGGACAAGGCTCCCTATGTAGC |
| cai11-8       | TTGGACTAGAAATCTCGTGCTGATTAATTGTTTTACGCGTGCGTTTGTGTGGATTGTAGGACAAGGCTCCCTATGTAGC |
| 75-14gao      | TTGGACTAGAAATCTCGTGCTGATTAATTGTTTTACGCGTGCGTTTGTGTGGATTGTAGGACAAGGCTCCCTATGTAGC |
| 030-1         | TTGGACTAGAAATCTCGTGCTGATTAATTGTTTTACGCGTGCGTTTGTGTGGATTGTAGGACAAGGCTCCCTATGTAGC |
| 707           | TTGGACTAGAAATCTCGTGCTGATTAATTGTTTTACGCGTGCGTTTGTGTGGATTGTAGGACAAGGCTCCCTATGTAGC |
| wu312         | ATGGACTAGAAATCTCGTGCTGATTAATTGTTTTACGCGTGCGTTTGTGTGGATTGTAGGACAAGGCTCCCTATGTAGC |
| L005          | ATGGACTAGAAATCTCGTGCTGATTAATTGTTTTACGCGTGCGTTTGTGTGGATTGTAGGACAAGGCTCCCTATGTAGC |
| L069          | ATGGACTAGAAATCTCGTGCTGATTAATTGTTTTACGCGTGCGTTTGTGTGGATTGTAGGACAAGGCTCCCTATGTAGC |
| ning24        | ATGGACTAGAAATCTCGTGCTGATTAATTGTTTTACGCGTGCGTTTGTGTGGATTGTAGGACAAGGCTCCCTATGTAGC |
| zhongyin10    | TTGGACTAGAAATCTCGTGCTGATTAATTGTTTTACGCGTGCGTTTGTGTGGATTGTAGGACAAGGCTCCCTATGTAGC |
| zhongyin15    | ATGGACTAGAAATCTCGTGCTGATTAATTGTTTTACGCGTGCGTTTGTGTGGATTGTAGGACAAGGCTCCCTATGTAGC |
| NN14B         | TTGGACTAGAAATCTCGTGCTGATTAATTGTTTTACGCGTGCGTTTGTGTGGATTGTAGGACAAGGCTCCCTATGTAGC |
| ZPON7         | ATGGACTAGAAATCTCGTGCTGATTAATTGTTTTACGCGTGCGTTTGTGTGGATTGTAGGACAAGGCTCCCTATGTAGC |
| 75-364        | TTGGACTAGAAATCTCGTGCTGATTAATTGTTTTACGCGTGCGTTTGTGTGGATTGTAGGACAAGGCTCCCTATGTAGC |
| MP704         | TTGGACTAGAAATCTCGTGCTGATTAATTGTTTTACGCGTGCGTTTGTGTGGATTGTAGGACAAGGCTCCCTATGTAGC |

| Lines        | Sequence                                                                        |
|--------------|---------------------------------------------------------------------------------|
| L105         | ATGGACTAGAAATCTCGTGCTGATTAATTGTTTTACGCGTGCGTTTGTGTGGATTGTAGGACAAGGCTCCCTATGTAGC |
| Va35         | TTGGACTAGAAATCTCGTGCTGATTAATTGTTTTACGCGTGCGTTTGTGTGGATTGTAGGACAAGGCTCCCTATGTAGC |
| De811        | TTGGACTAGAAATCTCGTGCTGATTAATTGTTTTACGCGTGCGTTTGTGTGGATTGTAGGACAAGGCTCCCTATGTAGC |
| DH65232(DH9) | TTGGACTAGAAATCTCGTGCTGATTAATTGTTTTACGCGTGCGTTTGTGTGGATTGTAGGACAAGGCTCCCTATGTAGC |
| Lo1067       | TTGGACTAGAAATCTCGTGCTGATTAATTGTTTTACGCGTGCGTTTGTGTGGATTGTAGGACAAGGCTCCCTATGTAGC |
| han21        | TTGGACTAGAAATCTCGTGCTGATTAATTGTTTTACGCGTGCGTTTGTGTGGATTGTAGGACAAGGCTCCCTATGTAGC |
| chang69      | TTGGACTAGAAATCTCGTGCTGATTAATTGTTTTACGCGTGCGTTTGTGTGGATTGTAGGACAAGGCTCCCTATGTAGC |
| huobai       | ATGGACTAGAAATCTCGTGCTGATTAATTGTTTTACGCGTGCGTTTGTGTGGATTGTAGGACAAGGCTCCCTATGTAGC |
| yuanwu05     | TTGGACTAGAAATCTCGTGCTGATTAATTGTTTTACGCGTGCGTTTGTGTGGATTGTAGGACAAGGCTCCCTATGTAGC |
| S7913        | TTGGACTAGAAATCTCGTGCTGATTAATTGTTTTACGCGTGCGTTTGTGTGGATTGTAGGACAAGGCTCCCTATGTAGC |
| xingK36      | TTGGACTAGAAATCTCGTGCTGATTAATTGTTTTACGCGTGCGTTTGTGTGGATTGTAGGACAAGGCTCCCTATGTAGC |
| BS110        | TTGGACTAGAAATCTCGTGCTGATTAATTGTTTTACGCGTGCGTTTGTGTGGATTGTAGGACAAGGCTCCCTATGTAGC |
| LH52         | TTGGACTAGAAATCTCGTGCTGATTAATTGTTTTACGCGTGCGTTTGTGTGGATTGTAGGACAAGGCTCCCTATGTAGC |
| FR14         | TTGGACTAGAAATCTCGTGCTGATTAATTGTTTTACGCGTGCGTTTGTGTGGATTGTAGGACAAGGCTCCCTATGTAGC |
| F42          | TTGGACTAGAAATCTCGTGCTGATTAATTGTTTTACGCGTGCGTTTGTGTGGATTGTAGGACAAGGCTCCCTATGTAGC |
| LH93         | ATGGACTAGAAATCTCGTGCTGATTAATTGTTTTACGCGTGCGTTTGTGTGGATTGTAGGACAAGGCTCCCTATGTAGC |
| 807          | TTGGACTAGAAATCTCGTGCTGATTAATTGTTTTACGCGTGCGTTTGTGTGGATTGTAGGACAAGGCTCCCTATGTAGC |
| PHN11        | TTGGACTAGAAATCTCGTGCTGATTAATTGTTTTACGCGTGCGTTTGTGTGGATTGTAGGACAAGGCTCCCTATGTAGC |
| 680          | TTGGACTAGAAATCTCGTGCTGATTAATTGTTTTACGCGTGCGTTTGTGTGGATTGTAGGACAAGGCTCCCTATGTAGC |
| LH54         | TTGGACTAGAAATCTCGTGCTGATTAATTGTTTTACGCGTGCGTTTGTGTGGATTGTAGGACAAGGCTCCCTATGTAGC |
| DJ7          | TTGGACTAGAAATCTCGTGCTGATTAATTGTTTTACGCGTGCGTTTGTGTGGATTGTAGGACAAGGCTCCCTATGTAGC |
| PHG83        | TTGGACTAGAAATCTCGTGCTGATTAATTGTTTTACGCGTGCGTTTGTGTGGATTGTAGGACAAGGCTCCCTATGTAGC |

| Lines | Sequence                                                                        |
|-------|---------------------------------------------------------------------------------|
| PHG72 | TTGGACTAGAAATCTCGTGCTGATTAATTGTTTTACGCGTGCGTTTGTGTGGATTGTAGGACAAGGCTCCCTATGTAGC |
| B09   | TTGGACTAGAAATCTCGTGCTGATTAATTGTTTTACGCGTGCGTTTGTGTGGATTGTAGGACAAGGCTCCCTATGTAGC |
| PHW43 | TTGGACTAGAAATCTCGTGCTGATTAATTGTTTTACGCGTGCGTTTGTGTGGATTGTAGGACAAGGCTCCCTATGTAGC |
| PHT60 | ATGGACTAGAAATCTCGTGCTGATTAATTGTTTTACGCGTGCGTTTGTGTGGATTGTAGGACAAGGCTCCCTATGTAGC |
| PHW52 | TTGGACTAGAAATCTCGTGCTGATTAATTGTTTTACGCGTGCGTTTGTGTGGATTGTAGGACAAGGCTCCCTATGTAGC |
| PHW79 | TTGGACTAGAAATCTCGTGCTGATTAATTGTTTTACGCGTGCGTTTGTGTGGATTGTAGGACAAGGCTCCCTATGTAGC |
| PHJ31 | ATGGACTAGAAATCTCGTGCTGATTAATTGTTTTACGCGTGCGTTTGTGTGGATTGTAGGACAAGGCTCCCTATGTAGC |
| PHN29 | ATGGACTAGAAATCTCGTGCTGATTAATTGTTTTACGCGTGCGTTTGTGTGGATTGTAGGACAAGGCTCCCTATGTAGC |
| 795   | TTGGACTAGAAATCTCGTGCTGATTAATTGTTTTACGCGTGCGTTTGTGTGGATTGTAGGACAAGGCTCCCTATGTAGC |
| LH190 | TTGGACTAGAAATCTCGTGCTGATTAATTGTTTTACGCGTGCGTTTGTGTGGATTGTAGGACAAGGCTCCCTATGTAGC |
| IBC2  | ATGGACTAGAAATCTCGTGCTGATTAATTGTTTTACGCGTGCGTTTGTGTGGATTGTAGGACAAGGCTCCCTATGTAGC |
| PHK24 | TTGGACTAGAAATCTCGTGCTGATTAATTGTTTTACGCGTGCGTTTGTGTGGATTGTAGGACAAGGCTCCCTATGTAGC |
| PHG71 | ATGGACTAGAAATCTCGTGCTGATTAATTGTTTTACGCGTGCGTTTGTGTGGATTGTAGGACAAGGCTCCCTATGTAGC |
| PB80  | TTGGACTAGAAATCTCGTGCTGATTAATTGTTTTACGCGTGCGTTTGTGTGGATTGTAGGACAAGGCTCCCTATGTAGC |
| FAPW  | TTGGACTAGAAATCTCGTGCTGATTAATTGTTTTACGCGTGCGTTTGTGTGGATTGTAGGACAAGGCTCCCTATGTAGC |
| LH61  | TTGGACTAGAAATCTCGTGCTGATTAATTGTTTTACGCGTGCGTTTGTGTGGATTGTAGGACAAGGCTCCCTATGTAGC |
| Q381  | ATGGACTAGAAATCTCGTGCTGATTAATTGTTTTACGCGTGCGTTTGTGTGGATTGTAGGACAAGGCTCCCTATGTAGC |
| PHJ40 | TTGGACTAGAAATCTCGTGCTGATTAATTGTTTTACGCGTGCGTTTGTGTGGATTGTAGGACAAGGCTCCCTATGTAGC |
| PH207 | ATGGACTAGAAATCTCGTGCTGATTAATTGTTTTACGCGTGCGTTTGTGTGGATTGTAGGACAAGGCTCCCTATGTAGC |
| Mo17  | TTGGACTAGAAATCTCGTGCTGATTAATTGTTTTACGCGTGCGTTTGTGTGGATTGTAGGACAAGGCTCCCTATGTAGC |
| B73   | TTGGACTAGAAATCTCGTGCTGATTAATTGTTTTACGCGTGCGTTTGTGTGGATTGTAGGACAAGGCTCCCTATGTAGC |
| PHG39 | TTGGACTAGAAATCTCGTGCTGATTAATTGTTTTACGCGTGCGTTTGTGTGGATTGTAGGACAAGGCTCCCTATGTAGC |

| Lines      | Sequence                                                                        |
|------------|---------------------------------------------------------------------------------|
| LH51       | TTGGACTAGAAATCTCGTGCTGATTAATTGTTTTACGCGTGCGTTTGTGTGGATTGTAGGACAAGGCTCCCTATGTAGC |
| LH74       | TTGGACTAGAAATCTCGTGCTGATTAATTGTTTTACGCGTGCGTTTGTGTGGATTGTAGGACAAGGCTCCCTATGTAGC |
| LH132      | TTGGACTAGAAATCTCGTGCTGATTAATTGTTTTACGCGTGCGTTTGTGTGGATTGTAGGACAAGGCTCCCTATGTAGC |
| Seagull117 | TTGGACTAGAAATCTCGTGCTGATTAATTGTTTTACGCGTGCGTTTGTGTGGATTGTAGGACAAGGCTCCCTATGTAGC |
| PHT55      | TTGGACTAGAAATCTCGTGCTGATTAATTGTTTTACGCGTGCGTTTGTGTGGATTGTAGGACAAGGCTCCCTATGTAGC |
| OH43       | TTGGACTAGAAATCTCGTGCTGATTAATTGTTTTACGCGTGCGTTTGTGTGGATTGTAGGACAAGGCTCCCTATGTAGC |
| LH65       | TTGGACTAGAAATCTCGTGCTGATTAATTGTTTTACGCGTGCGTTTGTGTGGATTGTAGGACAAGGCTCCCTATGTAGC |
| HBAI       | TTGGACTAGAAATCTCGTGCTGATTAATTGTTTTACGCGTGCGTTTGTGTGGATTGTAGGACAAGGCTCCCTATGTAGC |
| oh07B      | TTGGACTAGAAATCTCGTGCTGATTAATTGTTTTACGCGTGCGTTTGTGTGGATTGTAGGACAAGGCTCCCTATGTAGC |
| PHH93      | ATGGACTAGAAATCTCGTGCTGATTAATTGTTTTACGCGTGCGTTTGTGTGGATTGTAGGACAAGGCTCCCTATGTAGC |
| PHP02      | TTGGACTAGAAATCTCGTGCTGATTAATTGTTTTACGCGTGCGTTTGTGTGGATTGTAGGACAAGGCTCCCTATGTAGC |
| 78551S     | TTGGACTAGAAATCTCGTGCTGATTAATTGTTTTACGCGTGCGTTTGTGTGGATTGTAGGACAAGGCTCCCTATGTAGC |
| PHG24      | TTGGACTAGAAATCTCGTGCTGATTAATTGTTTTACGCGTGCGTTTGTGTGGATTGTAGGACAAGGCTCCCTATGTAGC |
| FBHJ       | ATGGACTAGAAATCTCGTGCTGATTAATTGTTTTACGCGTGCGTTTGTGTGGATTGTAGGACAAGGCTCCCTATGTAGC |
| 794        | TTGGACTAGAAATCTCGTGCTGATTAATTGTTTTACGCGTGCGTTTGTGTGGATTGTAGGACAAGGCTCCCTATGTAGC |
| 743        | TTGGACTAGAAATCTCGTGCTGATTAATTGTTTTACGCGTGCGTTTGTGTGGATTGTAGGACAAGGCTCCCTATGTAGC |
| LH149      | TTGGACTAGAAATCTCGTGCTGATTAATTGTTTTACGCGTGCGTTTGTGTGGATTGTAGGACAAGGCTCCCTATGTAGC |
| 764        | TTGGACTAGAAATCTCGTGCTGATTAATTGTTTTACGCGTGCGTTTGTGTGGATTGTAGGACAAGGCTCCCTATGTAGC |
| PHT77      | TTGGACTAGAAATCTCGTGCTGATTAATTGTTTTACGCGTGCGTTTGTGTGGATTGTAGGACAAGGCTCCCTATGTAGC |
| 740        | TTGGACTAGAAATCTCGTGCTGATTAATTGTTTTACGCGTGCGTTTGTGTGGATTGTAGGACAAGGCTCCCTATGTAGC |
| LH145      | TTGGACTAGAAATCTCGTGCTGATTAATTGTTTTACGCGTGCGTTTGTGTGGATTGTAGGACAAGGCTCCCTATGTAGC |
| LH57       | TTGGACTAGAAATCTCGTGCTGATTAATTGTTTTACGCGTGCGTTTGTGTGGATTGTAGGACAAGGCTCCCTATGTAGC |

| Lines   | Sequence                                                                        |
|---------|---------------------------------------------------------------------------------|
| LH205   | TTGGACTAGAAATCTCGTGCTGATTAATTGTTTTACGCGTGCGTTTGTGTGGATTGTAGGACAAGGCTCCCTATGTAGC |
| LH196   | TTGGACTAGAAATCTCGTGCTGATTAATTGTTTTACGCGTGCGTTTGTGTGGATTGTAGGACAAGGCTCCCTATGTAGC |
| LH220Ht | TTGGACTAGAAATCTCGTGCTGATTAATTGTTTTACGCGTGCGTTTGTGTGGATTGTAGGACAAGGCTCCCTATGTAGC |
| LH162   | TTGGACTAGAAATCTCGTGCTGATTAATTGTTTTACGCGTGCGTTTGTGTGGATTGTAGGACAAGGCTCCCTATGTAGC |
| LH202   | TTGGACTAGAAATCTCGTGCTGATTAATTGTTTTACGCGTGCGTTTGTGTGGATTGTAGGACAAGGCTCCCTATGTAGC |
| LH192   | TTGGACTAGAAATCTCGTGCTGATTAATTGTTTTACGCGTGCGTTTGTGTGGATTGTAGGACAAGGCTCCCTATGTAGC |
| PHP76   | ATGGACTAGAAATCTCGTGCTGATTAATTGTTTTACGCGTGCGTTTGTGTGGATTGTAGGACAAGGCTCCCTATGTAGC |
| PHW51   | TTGGACTAGAAATCTCGTGCTGATTAATTGTTTTACGCGTGCGTTTGTGTGGATTGTAGGACAAGGCTCCCTATGTAGC |
| LH208   | TTGGACTAGAAATCTCGTGCTGATTAATTGTTTTACGCGTGCGTTTGTGTGGATTGTAGGACAAGGCTCCCTATGTAGC |
| Lp215D  | TTGGACTAGAAATCTCGTGCTGATTAATTGTTTTACGCGTGCGTTTGTGTGGATTGTAGGACAAGGCTCCCTATGTAGC |
| PHK93   | TTGGACTAGAAATCTCGTGCTGATTAATTGTTTTACGCGTGCGTTTGTGTGGATTGTAGGACAAGGCTCCCTATGTAGC |
| PHN66   | TTGGACTAGAAATCTCGTGCTGATTAATTGTTTTACGCGTGCGTTTGTGTGGATTGTAGGACAAGGCTCCCTATGTAGC |
| PHR58   | TTGGACTAGAAATCTCGTGCTGATTAATTGTTTTACGCGTGCGTTTGTGTGGATTGTAGGACAAGGCTCCCTATGTAGC |
| PHW30   | TTGGACTAGAAATCTCGTGCTGATTAATTGTTTTACGCGTGCGTTTGTGTGGATTGTAGGACAAGGCTCCCTATGTAGC |
| 29MIBZ2 | ATGGACTAGAAATCTCGTGCTGATTAATTGTTTTACGCGTGCGTTTGTGTGGATTGTAGGACAAGGCTCCCTATGTAGC |
| MBSJ    | TTGGACTAGAAATCTCGTGCTGATTAATTGTTTTACGCGTGCGTTTGTGTGGATTGTAGGACAAGGCTCCCTATGTAGC |
| LH215   | TTGGACTAGAAATCTCGTGCTGATTAATTGTTTTACGCGTGCGTTTGTGTGGATTGTAGGACAAGGCTCCCTATGTAGC |
| MM402A  | ATGGACTAGAAATCTCGTGCTGATTAATTGTTTTACGCGTGCGTTTGTGTGGATTGTAGGACAAGGCTCCCTATGTAGC |
| 3IBZ2   | ATGGACTAGAAATCTCGTGCTGATTAATTGTTTTACGCGTGCGTTTGTGTGGATTGTAGGACAAGGCTCCCTATGTAGC |
| LIBC4   | ATGGACTAGAAATCTCGTGCTGATTAATTGTTTTACGCGTGCGTTTGTGTGGATTGTAGGACAAGGCTCCCTATGTAGC |
| 83IBI3  | ATGGACTAGAAATCTCGTGCTGATTAATTGTTTTACGCGTGCGTTTGTGTGGATTGTAGGACAAGGCTCCCTATGTAGC |
| NQ508   | TTGGACTAGAAATCTCGTGCTGATTAATTGTTTTACGCGTGCGTTTGTGTGGATTGTAGGACAAGGCTCCCTATGTAGC |

| Lines   | Sequence                                                                        |
|---------|---------------------------------------------------------------------------------|
| PHBA6   | TTGGACTAGAAATCTCGTGCTGATTAATTGTTTTACGCGTGCGTTTGTGTGGATTGTAGGACAAGGCTCCCTATGTAGC |
| PHPR5   | TTGGACTAGAAATCTCGTGCTGATTAATTGTTTTACGCGTGCGTTTGTGTGGATTGTAGGACAAGGCTCCCTATGTAGC |
| PHT69   | TTGGACTAGAAATCTCGTGCTGATTAATTGTTTTACGCGTGCGTTTGTGTGGATTGTAGGACAAGGCTCCCTATGTAGC |
| PHV53   | TTGGACTAGAAATCTCGTGCTGATTAATTGTTTTACGCGTGCGTTTGTGTGGATTGTAGGACAAGGCTCCCTATGTAGC |
| PHWG5   | TTGGACTAGAAATCTCGTGCTGATTAATTGTTTTACGCGTGCGTTTGTGTGGATTGTAGGACAAGGCTCCCTATGTAGC |
| ML606   | ATGGACTAGAAATCTCGTGCTGATTAATTGTTTTACGCGTGCGTTTGTGTGGATTGTAGGACAAGGCTCCCTATGTAGC |
| LH119   | TTGGACTAGAAATCTCGTGCTGATTAATTGTTTTACGCGTGCGTTTGTGTGGATTGTAGGACAAGGCTCCCTATGTAGC |
| MDF-13D | TTGGACTAGAAATCTCGTGCTGATTAATTGTTTTACGCGTGCGTTTGTGTGGATTGTAGGACAAGGCTCCCTATGTAGC |
| CR1HT   | TTGGACTAGAAATCTCGTGCTGATTAATTGTTTTACGCGTGCGTTTGTGTGGATTGTAGGACAAGGCTCCCTATGTAGC |
| IB014   | ATGGACTAGAAATCTCGTGCTGATTAATTGTTTTACGCGTGCGTTTGTGTGGATTGTAGGACAAGGCTCCCTATGTAGC |
| 5707    | TTGGACTAGAAATCTCGTGCTGATTAATTGTTTTACGCGTGCGTTTGTGTGGATTGTAGGACAAGGCTCCCTATGTAGC |
| PHR36   | TTGGACTAGAAATCTCGTGCTGATTAATTGTTTTACGCGTGCGTTTGTGTGGATTGTAGGACAAGGCTCCCTATGTAGC |
| PHW17   | TTGGACTAGAAATCTCGTGCTGATTAATTGTTTTACGCGTGCGTTTGTGTGGATTGTAGGACAAGGCTCCCTATGTAGC |
| LP5     | TTGGACTAGAAATCTCGTGCTGATTAATTGTTTTACGCGTGCGTTTGTGTGGATTGTAGGACAAGGCTCCCTATGTAGC |
| PHG86   | TTGGACTAGAAATCTCGTGCTGATTAATTGTTTTACGCGTGCGTTTGTGTGGATTGTAGGACAAGGCTCCCTATGTAGC |
| IBB15   | ATGGACTAGAAATCTCGTGCTGATTAATTGTTTTACGCGTGCGTTTGTGTGGATTGTAGGACAAGGCTCCCTATGTAGC |
| W8304   | TTGGACTAGAAATCTCGTGCTGATTAATTGTTTTACGCGTGCGTTTGTGTGGATTGTAGGACAAGGCTCCCTATGTAGC |
| 2369    | TTGGACTAGAAATCTCGTGCTGATTAATTGTTTTACGCGTGCGTTTGTGTGGATTGTAGGACAAGGCTCCCTATGTAGC |
| MBST    | TTGGACTAGAAATCTCGTGCTGATTAATTGTTTTACGCGTGCGTTTGTGTGGATTGTAGGACAAGGCTCCCTATGTAGC |
| OQ603   | TTGGACTAGAAATCTCGTGCTGATTAATTGTTTTACGCGTGCGTTTGTGTGGATTGTAGGACAAGGCTCCCTATGTAGC |
| S8326   | TTGGACTAGAAATCTCGTGCTGATTAATTGTTTTACGCGTGCGTTTGTGTGGATTGTAGGACAAGGCTCCCTATGTAGC |
| 1538    | TTGGACTAGAAATCTCGTGCTGATTAATTGTTTTACGCGTGCGTTTGTGTGGATTGTAGGACAAGGCTCCCTATGTAGC |



| Lines      | Sequence                                                                        |
|------------|---------------------------------------------------------------------------------|
| CR14       | TTGGACTAGAAATCTCGTGCTGATTAATTGTTTTACGCGTGCGTTTGTGTGGATTGTAGGACAAGGCTCCCTATGTAGC |
| WIL900     | TTGGACTAGAAATCTCGTGCTGATTAATTGTTTTACGCGTGCGTTTGTGTGGATTGTAGGACAAGGCTCCCTATGTAGC |
| WIL903     | TTGGACTAGAAATCTCGTGCTGATTAATTGTTTTACGCGTGCGTTTGTGTGGATTGTAGGACAAGGCTCCCTATGTAGC |
| L127       | ATGGACTAGAAATCTCGTGCTGATTAATTGTTTTACGCGTGCGTTTGTGTGGATTGTAGGACAAGGCTCCCTATGTAGC |
| L135       | ATGGACTAGAAATCTCGTGCTGATTAATTGTTTTACGCGTGCGTTTGTGTGGATTGTAGGACAAGGCTCCCTATGTAGC |
| L139       | ATGGACTAGAAATCTCGTGCTGATTAATTGTTTTACGCGTGCGTTTGTGTGGATTGTAGGACAAGGCTCCCTATGTAGC |
| PHK35      | TTGGACTAGAAATCTCGTGCTGATTAATTGTTTTACGCGTGCGTTTGTGTGGATTGTAGGACAAGGCTCCCTATGTAGC |
| PHM10      | ATGGACTAGAAATCTCGTGCTGATTAATTGTTTTACGCGTGCGTTTGTGTGGATTGTAGGACAAGGCTCCCTATGTAGC |
| PHP60      | TTGGACTAGAAATCTCGTGCTGATTAATTGTTTTACGCGTGCGTTTGTGTGGATTGTAGGACAAGGCTCCCTATGTAGC |
| PHR63      | TTGGACTAGAAATCTCGTGCTGATTAATTGTTTTACGCGTGCGTTTGTGTGGATTGTAGGACAAGGCTCCCTATGTAGC |
| PHV37      | TTGGACTAGAAATCTCGTGCTGATTAATTGTTTTACGCGTGCGTTTGTGTGGATTGTAGGACAAGGCTCCCTATGTAGC |
| 中 741      | TTGGACTAGAAATCTCGTGCTGATTAATTGTTTTACGCGTGCGTTTGTGTGGATTGTAGGACAAGGCTCCCTATGTAGC |
| 太 1/Lg     | TTGGACTAGAAATCTCGTGCTGATTAATTGTTTTACGCGTGCGTTTGTGTGGATTGTAGGACAAGGCTCCCTATGTAGC |
| LH150      | TTGGACTAGAAATCTCGTGCTGATTAATTGTTTTACGCGTGCGTTTGTGTGGATTGTAGGACAAGGCTCCCTATGTAGC |
| B64        | TTGGACTAGAAATCTCGTGCTGATTAATTGTTTTACGCGTGCGTTTGTGTGGATTGTAGGACAAGGCTCCCTATGTAGC |
| B67        | TTGGACTAGAAATCTCGTGCTGATTAATTGTTTTACGCGTGCGTTTGTGTGGATTGTAGGACAAGGCTCCCTATGTAGC |
| B129       | TTGGACTAGAAATCTCGTGCTGATTAATTGTTTTACGCGTGCGTTTGTGTGGATTGTAGGACAAGGCTCCCTATGTAGC |
| B130       | TTGGACTAGAAATCTCGTGCTGATTAATTGTTTTACGCGTGCGTTTGTGTGGATTGTAGGACAAGGCTCCCTATGTAGC |
| CI187-2    | TTGGACTAGAAATCTCGTGCTGATTAATTGTTTTACGCGTGCGTTTGTGTGGATTGTAGGACAAGGCTCCCTATGTAGC |
| WD456      | TTGGACTAGAAATCTCGTGCTGATTAATTGTTTTACGCGTGCGTTTGTGTGGATTGTAGGACAAGGCTCCCTATGTAGC |
| 792        | TTGGACTAGAAATCTCGTGCTGATTAATTGTTTTACGCGTGCGTTTGTGTGGATTGTAGGACAAGGCTCCCTATGTAGC |
| DNMD30(东农) | TTGGACTAGAAATCTCGTGCTGATTAATTGTTTTACGCGTGCGTTTGTGTGGATTGTAGGACAAGGCTCCCTATGTAGC |

| Lines      | Sequence                                                                        |
|------------|---------------------------------------------------------------------------------|
| 龙单 16♀     | TTGGACTAGAAATCTCGTGCTGATTAATTGTTTTACGCGTGCGTTTGTGTGGATTGTAGGACAAGGCTCCCTATGTAGC |
| 海 268      | ATGGACTAGAAATCTCGTGCTGATTAATTGTTTTACGCGTGCGTTTGTGTGGATTGTAGGACAAGGCTCCCTATGTAGC |
| H2417      | TTGGACTAGAAATCTCGTGCTGATTAATTGTTTTACGCGTGCGTTTGTGTGGATTGTAGGACAAGGCTCCCTATGTAGC |
| 2036       | TTGGACTAGAAATCTCGTGCTGATTAATTGTTTTACGCGTGCGTTTGTGTGGATTGTAGGACAAGGCTCCCTATGTAGC |
| H145       | ATGGACTAGAAATCTCGTGCTGATTAATTGTTTTACGCGTGCGTTTGTGTGGATTGTAGGACAAGGCTCCCTATGTAGC |
| H1311      | TTGGACTAGAAATCTCGTGCTGATTAATTGTTTTACGCGTGCGTTTGTGTGGATTGTAGGACAAGGCTCCCTATGTAGC |
| H957       | TTGGACTAGAAATCTCGTGCTGATTAATTGTTTTACGCGTGCGTTTGTGTGGATTGTAGGACAAGGCTCCCTATGTAGC |
| H954       | TTGGACTAGAAATCTCGTGCTGATTAATTGTTTTACGCGTGCGTTTGTGTGGATTGTAGGACAAGGCTCCCTATGTAGC |
| 268(9 粒)   | ATGGACTAGAAATCTCGTGCTGATTAATTGTTTTACGCGTGCGTTTGTGTGGATTGTAGGACAAGGCTCCCTATGTAGC |
| FR1454     | TTGGACTAGAAATCTCGTGCTGATTAATTGTTTTACGCGTGCGTTTGTGTGGATTGTAGGACAAGGCTCCCTATGTAGC |
| KP315      | TTGGACTAGAAATCTCGTGCTGATTAATTGTTTTACGCGTGCGTTTGTGTGGATTGTAGGACAAGGCTCCCTATGTAGC |
| KM501      | ATGGACTAGAAATCTCGTGCTGATTAATTGTTTTACGCGTGCGTTTGTGTGGATTGTAGGACAAGGCTCCCTATGTAGC |
| EP8        | TTGGACTAGAAATCTCGTGCTGATTAATTGTTTTACGCGTGCGTTTGTGTGGATTGTAGGACAAGGCTCCCTATGTAGC |
| Zheng58    | TTGGACTAGAAATCTCGTGCTGATTAATTGTTTTACGCGTGCGTTTGTGTGGATTGTAGGACAAGGCTCCCTATGTAGC |
| c7-2       | TTGGACTAGAAATCTCGTGCTGATTAATTGTTTTACGCGTGCGTTTGTGTGGATTGTAGGACAAGGCTCCCTATGTAGC |
| Huangc     | TTGGACTAGAAATCTCGTGCTGATTAATTGTTTTACGCGTGCGTTTGTGTGGATTGTAGGACAAGGCTCCCTATGTAGC |
| 科禾 699-母本  | TTGGACTAGAAATCTCGTGCTGATTAATTGTTTTACGCGTGCGTTTGTGTGGATTGTAGGACAAGGCTCCCTATGTAGC |
| 中农大 788-母本 | TTGGACTAGAAATCTCGTGCTGATTAATTGTTTTACGCGTGCGTTTGTGTGGATTGTAGGACAAGGCTCCCTATGTAGC |
| 科禾 699-父本  | TTGGACTAGAAATCTCGTGCTGATTAATTGTTTTACGCGTGCGTTTGTGTGGATTGTAGGACAAGGCTCCCTATGTAGC |
| DH149      | TTGGACTAGAAATCTCGTGCTGATTAATTGTTTTACGCGTGCGTTTGTGTGGATTGTAGGACAAGGCTCCCTATGTAGC |
| B4         | ATGGACTAGAAATCTCGTGCTGATTAATTGTTTTACGCGTGCGTTTGTGTGGATTGTAGGACAAGGCTCCCTATGTAGC |
| 78599      | ATGGACTAGAAATCTCGTGCTGATTAATTGTTTTACGCGTGCGTTTGTGTGGATTGTAGGACAAGGCTCCCTATGTAGC |

| Lines     | Sequence                                                                        |
|-----------|---------------------------------------------------------------------------------|
| 807D      | TTGGACTAGAAATCTCGTGCTGATTAATTGTTTTACGCGTGCGTTTGTGTGGATTGTAGGACAAGGCTCCCTATGTAGC |
| E200      | ATGGACTAGAAATCTCGTGCTGATTAATTGTTTTACGCGTGCGTTTGTGTGGATTGTAGGACAAGGCTCCCTATGTAGC |
| D88       | ATGGACTAGAAATCTCGTGCTGATTAATTGTTTTACGCGTGCGTTTGTGTGGATTGTAGGACAAGGCTCCCTATGTAGC |
| B97       | TTGGACTAGAAATCTCGTGCTGATTAATTGTTTTACGCGTGCGTTTGTGTGGATTGTAGGACAAGGCTCCCTATGTAGC |
| B102      | TTGGACTAGAAATCTCGTGCTGATTAATTGTTTTACGCGTGCGTTTGTGTGGATTGTAGGACAAGGCTCCCTATGTAGC |
| zong3     | TTGGACTAGAAATCTCGTGCTGATTAATTGTTTTACGCGTGCGTTTGTGTGGATTGTAGGACAAGGCTCCCTATGTAGC |
| W966      | TTGGACTAGAAATCTCGTGCTGATTAATTGTTTTACGCGTGCGTTTGTGTGGATTGTAGGACAAGGCTCCCTATGTAGC |
| changD    | TTGGACTAGAAATCTCGTGCTGATTAATTGTTTTACGCGTGCGTTTGTGTGGATTGTAGGACAAGGCTCCCTATGTAGC |
| M101      | TTGGACTAGAAATCTCGTGCTGATTAATTGTTTTACGCGTGCGTTTGTGTGGATTGTAGGACAAGGCTCCCTATGTAGC |
| jian1495a | TTGGACTAGAAATCTCGTGCTGATTAATTGTTTTACGCGTGCGTTTGTGTGGATTGTAGGACAAGGCTCCCTATGTAGC |
| D20       | TTGGACTAGAAATCTCGTGCTGATTAATTGTTTTACGCGTGCGTTTGTGTGGATTGTAGGACAAGGCTCCCTATGTAGC |
| PN2       | TTGGACTAGAAATCTCGTGCTGATTAATTGTTTTACGCGTGCGTTTGTGTGGATTGTAGGACAAGGCTCCCTATGTAGC |
| hai014    | ATGGACTAGAAATCTCGTGCTGATTAATTGTTTTACGCGTGCGTTTGTGTGGATTGTAGGACAAGGCTCCCTATGTAGC |
| chang3    | TTGGACTAGAAATCTCGTGCTGATTAATTGTTTTACGCGTGCGTTTGTGTGGATTGTAGGACAAGGCTCCCTATGTAGC |
| shuang741 | TTGGACTAGAAATCTCGTGCTGATTAATTGTTTTACGCGTGCGTTTGTGTGGATTGTAGGACAAGGCTCCCTATGTAGC |
| ji434     | TTGGACTAGAAATCTCGTGCTGATTAATTGTTTTACGCGTGCGTTTGTGTGGATTGTAGGACAAGGCTCCCTATGTAGC |
| MO113     | TTGGACTAGAAATCTCGTGCTGATTAATTGTTTTACGCGTGCGTTTGTGTGGATTGTAGGACAAGGCTCCCTATGTAGC |
| ye515     | TTGGACTAGAAATCTCGTGCTGATTAATTGTTTTACGCGTGCGTTTGTGTGGATTGTAGGACAAGGCTCCCTATGTAGC |
| hu803     | TTGGACTAGAAATCTCGTGCTGATTAATTGTTTTACGCGTGCGTTTGTGTGGATTGTAGGACAAGGCTCCCTATGTAGC |
| ji53      | TTGGACTAGAAATCTCGTGCTGATTAATTGTTTTACGCGTGCGTTTGTGTGGATTGTAGGACAAGGCTCCCTATGTAGC |
| ye832     | TTGGACTAGAAATCTCGTGCTGATTAATTGTTTTACGCGTGCGTTTGTGTGGATTGTAGGACAAGGCTCCCTATGTAGC |
| yu374     | TTGGACTAGAAATCTCGTGCTGATTAATTGTTTTACGCGTGCGTTTGTGTGGATTGTAGGACAAGGCTCCCTATGTAGC |

| Lines          | Sequence                                                                        |
|----------------|---------------------------------------------------------------------------------|
| D978           | TTGGACTAGAAATCTCGTGCTGATTAATTGTTTTACGCGTGCGTTTGTGTGGATTGTAGGACAAGGCTCCCTATGTAGC |
| Q1261          | TTGGACTAGAAATCTCGTGCTGATTAATTGTTTTACGCGTGCGTTTGTGTGGATTGTAGGACAAGGCTCCCTATGTAGC |
| huotanghuang17 | ATGGACTAGAAATCTCGTGCTGATTAATTGTTTTACGCGTGCGTTTGTGTGGATTGTAGGACAAGGCTCCCTATGTAGC |
| 1205A          | TTGGACTAGAAATCTCGTGCTGATTAATTGTTTTACGCGTGCGTTTGTGTGGATTGTAGGACAAGGCTCCCTATGTAGC |
| 200B           | TTGGACTAGAAATCTCGTGCTGATTAATTGTTTTACGCGTGCGTTTGTGTGGATTGTAGGACAAGGCTCCCTATGTAGC |
| WN11H          | TTGGACTAGAAATCTCGTGCTGATTAATTGTTTTACGCGTGCGTTTGTGTGGATTGTAGGACAAGGCTCCCTATGTAGC |
| 98F1           | TTGGACTAGAAATCTCGTGCTGATTAATTGTTTTACGCGTGCGTTTGTGTGGATTGTAGGACAAGGCTCCCTATGTAGC |
| GY3            | TTGGACTAGAAATCTCGTGCTGATTAATTGTTTTACGCGTGCGTTTGTGTGGATTGTAGGACAAGGCTCCCTATGTAGC |
| 4936           | TTGGACTAGAAATCTCGTGCTGATTAATTGTTTTACGCGTGCGTTTGTGTGGATTGTAGGACAAGGCTCCCTATGTAGC |
| DF32           | TTGGACTAGAAATCTCGTGCTGATTAATTGTTTTACGCGTGCGTTTGTGTGGATTGTAGGACAAGGCTCCCTATGTAGC |
| chong72        | TTGGACTAGAAATCTCGTGCTGATTAATTGTTTTACGCGTGCGTTTGTGTGGATTGTAGGACAAGGCTCCCTATGTAGC |
| P25            | TTGGACTAGAAATCTCGTGCTGATTAATTGTTTTACGCGTGCGTTTGTGTGGATTGTAGGACAAGGCTCCCTATGTAGC |
| SS99           | TTGGACTAGAAATCTCGTGCTGATTAATTGTTTTACGCGTGCGTTTGTGTGGATTGTAGGACAAGGCTCCCTATGTATC |
| BM             | TTGGACTAGAAATCTCGTGCTGATTAATTGTTTTACGCGTGCGTTTGTGTGGATTGTAGGACAAGGCTCCCTATGTAGC |
| d140           | TTGGACTAGAAATCTCGTGCTGATTAATTGTTTTACGCGTGCGTTTGTGTGGATTGTAGGACAAGGCTCCCTATGTAGC |
| 5003           | TTGGACTAGAAATCTCGTGCTGATTAATTGTTTTACGCGTGCGTTTGTGTGGATTGTAGGACAAGGCTCCCTATGTAGC |
| 20837          | TTGGACTAGAAATCTCGTGCTGATTAATTGTTTTACGCGTGCGTTTGTGTGGATTGTAGGACAAGGCTCCCTATGTAGC |
| Los-6          | TTGGACTAGAAATCTCGTGCTGATTAATTGTTTTACGCGTGCGTTTGTGTGGATTGTAGGACAAGGCTCCCTATGTAGC |
| XF27           | ATGGACTAGAAATCTCGTGCTGATTAATTGTTTTACGCGTGCGTTTGTGTGGATTGTAGGACAAGGCTCCCTATGTAGC |
| huo17          | TTGGACTAGAAATCTCGTGCTGATTAATTGTTTTACGCGTGCGTTTGTGTGGATTGTAGGACAAGGCTCCCTATGTAGC |
| jiutail        | TTGGACTAGAAATCTCGTGCTGATTAATTGTTTTACGCGTGCGTTTGTGTGGATTGTAGGACAAGGCTCCCTATGTAGC |
| SC14           | TTGGACTAGAAATCTCGTGCTGATTAATTGTTTTACGCGTGCGTTTGTGTGGATTGTAGGACAAGGCTCCCTATGTAGC |

| Lines   | Sequence                                                                        |
|---------|---------------------------------------------------------------------------------|
| DH65232 | TTGGACTAGAAATCTCGTGCTGATTAATTGTTTTACGCGTGCGTTTGTGTGGATTGTAGGACAAGGCTCCCTATGTAGC |
| ji533   | TTGGACTAGAAATCTCGTGCTGATTAATTGTTTTACGCGTGCGTTTGTGTGGATTGTAGGACAAGGCTCCCTATGTAGC |
| 8982    | TTGGACTAGAAATCTCGTGCTGATTAATTGTTTTACGCGTGCGTTTGTGTGGATTGTAGGACAAGGCTCCCTATGTAGC |
| D23     | TTGGACTAGAAATCTCGTGCTGATTAATTGTTTTACGCGTGCGTTTGTGTGGATTGTAGGACAAGGCTCCCTATGTAGC |
| 1127    | TTGGACTAGAAATCTCGTGCTGATTAATTGTTTTACGCGTGCGTTTGTGTGGATTGTAGGACAAGGCTCCCTATGTAGC |
| P167    | TTGGACTAGAAATCTCGTGCTGATTAATTGTTTTACGCGTGCGTTTGTGTGGATTGTAGGACAAGGCTCCCTATGTAGC |
| 17564   | TTGGACTAGAAATCTCGTGCTGATTAATTGTTTTACGCGTGCGTTTGTGTGGATTGTAGGACAAGGCTCCCTATGTAGC |
| M3      | TTGGACTAGAAATCTCGTGCTGATTAATTGTTTTACGCGTGCGTTTGTGTGGATTGTAGGACAAGGCTCCCTATGTAGC |
| 9702    | TTGGACTAGAAATCTCGTGCTGATTAATTGTTTTACGCGTGCGTTTGTGTGGATTGTAGGACAAGGCTCCCTATGTAGC |
| 9711    | TTGGACTAGAAATCTCGTGCTGATTAATTGTTTTACGCGTGCGTTTGTGTGGATTGTAGGACAAGGCTCCCTATGTAGC |
| 1101    | ATGGACTAGAAATCTCGTGCTGATTAATTGTTTTACGCGTGCGTTTGTGTGGATTGTAGGACAAGGCTCCCTATGTAGC |
| 3189    | TTGGACTAGAAATCTCGTGCTGATTAATTGTTTTACGCGTGCGTTTGTGTGGATTGTAGGACAAGGCTCCCTATGTAGC |
| LD61    | TTGGACTAGAAATCTCGTGCTGATTAATTGTTTTACGCGTGCGTTTGTGTGGATTGTAGGACAAGGCTCCCTATGTAGC |
| wu126   | TTGGACTAGAAATCTCGTGCTGATTAATTGTTTTACGCGTGCGTTTGTGTGGATTGTAGGACAAGGCTCCCTATGTAGC |
| W344    | TTGGACTAGAAATCTCGTGCTGATTAATTGTTTTACGCGTGCGTTTGTGTGGATTGTAGGACAAGGCTCCCTATGTAGC |
| S53     | TTGGACTAGAAATCTCGTGCTGATTAATTGTTTTACGCGTGCGTTTGTGTGGATTGTAGGACAAGGCTCCCTATGTAGC |
| 5023    | TTGGACTAGAAATCTCGTGCTGATTAATTGTTTTACGCGTGCGTTTGTGTGGATTGTAGGACAAGGCTCCCTATGTAGC |
| zi330   | TTGGACTAGAAATCTCGTGCTGATTAATTGTTTTACGCGTGCGTTTGTGTGGATTGTAGGACAAGGCTCCCTATGTAGC |
| siyi    | TTGGACTAGAAATCTCGTGCTGATTAATTGTTTTACGCGTGCGTTTGTGTGGATTGTAGGACAAGGCTCCCTATGTAGC |
| F7      | TTGGACTAGAAATCTCGTGCTGATTAATTGTTTTACGCGTGCGTTTGTGTGGATTGTAGGACAAGGCTCCCTATGTATC |
| xun971  | TTGGACTAGAAATCTCGTGCTGATTAATTGTTTTACGCGTGCGTTTGTGTGGATTGTAGGACAAGGCTCCCTATGTAGC |
| OH7     | TTGGACTAGAAATCTCGTGCTGATTAATTGTTTTACGCGTGCGTTTGTGTGGATTGTAGGACAAGGCTCCCTATGTAGC |

| Lines     | Sequence                                                                        |
|-----------|---------------------------------------------------------------------------------|
| ND246     | ATGGACTAGAAATCTCGTGCTGATTAATTGTTTTACGCGTGCGTTTGTGTGGATTGTAGGACAAGGCTCCCTATGTAGC |
| CM105     | TTGGACTAGAAATCTCGTGCTGATTAATTGTTTTACGCGTGCGTTTGTGTGGATTGTAGGACAAGGCTCCCTATGTAGC |
| B68       | TTGGACTAGAAATCTCGTGCTGATTAATTGTTTTACGCGTGCGTTTGTGTGGATTGTAGGACAAGGCTCCCTATGTAGC |
| Co109     | ATGGACTAGAAATCTCGTGCTGATTAATTGTTTTACGCGTGCGTTTGTGTGGATTGTAGGACAAGGCTCCCTATGTAGC |
| W182bn    | TTGGACTAGAAATCTCGTGCTGATTAATTGTTTTACGCGTGCGTTTGTGTGGATTGTAGGACAAGGCTCCCTATGTAGC |
| W117      | TTGGACTAGAAATCTCGTGCTGATTAATTGTTTTACGCGTGCGTTTGTGTGGATTGTAGGACAAGGCTCCCTATGTAGC |
| H84       | TTGGACTAGAAATCTCGTGCTGATTAATTGTTTTACGCGTGCGTTTGTGTGGATTGTAGGACAAGGCTCCCTATGTAGC |
| P39       | ATGGACTAGAAATCTCGTGCTGATTAATTGTTTTACGCGTGCGTTTGTGTGGATTGTAGGACAAGGCTCCCTATGTAGC |
| CT52C     | TTGGACTAGAAATCTCGTGCTGATTAATTGTTTTACGCGTGCGTTTGTGTGGATTGTAGGACAAGGCTCCCTATGTAGC |
| jiao51    | TTGGACTAGAAATCTCGTGCTGATTAATTGTTTTACGCGTGCGTTTGTGTGGATTGTAGGACAAGGCTCCCTATGTAGC |
| 77        | TTGGACTAGAAATCTCGTGCTGATTAATTGTTTTACGCGTGCGTTTGTGTGGATTGTAGGACAAGGCTCCCTATGTAGC |
| 7327      | TTGGACTAGAAATCTCGTGCTGATTAATTGTTTTACGCGTGCGTTTGTGTGGATTGTAGGACAAGGCTCCCTATGTAGC |
| daqing133 | TTGGACTAGAAATCTCGTGCTGATTAATTGTTTTACGCGTGCGTTTGTGTGGATTGTAGGACAAGGCTCCCTATGTAGC |
| mu6       | TTGGACTAGAAATCTCGTGCTGATTAATTGTTTTACGCGTGCGTTTGTGTGGATTGTAGGACAAGGCTCCCTATGTAGC |
| mu4       | TTGGACTAGAAATCTCGTGCTGATTAATTGTTTTACGCGTGCGTTTGTGTGGATTGTAGGACAAGGCTCCCTATGTAGC |
| yu537A    | TTGGACTAGAAATCTCGTGCTGATTAATTGTTTTACGCGTGCGTTTGTGTGGATTGTAGGACAAGGCTCCCTATGTAGC |
| yu82      | TTGGACTAGAAATCTCGTGCTGATTAATTGTTTTACGCGTGCGTTTGTGTGGATTGTAGGACAAGGCTCCCTATGTAGC |
| E28       | TTGGACTAGAAATCTCGTGCTGATTAATTGTTTTACGCGTGCGTTTGTGTGGATTGTAGGACAAGGCTCCCTATGTAGC |
| fanrong2  | ATGGACTAGAAATCTCGTGCTGATTAATTGTTTTACGCGTGCGTTTGTGTGGATTGTAGGACAAGGCTCCCTATGTAGC |
| zhong451  | TTGGACTAGAAATCTCGTGCTGATTAATTGTTTTACGCGTGCGTTTGTGTGGATTGTAGGACAAGGCTCCCTATGTAGC |
| M3736     | TTGGACTAGAAATCTCGTGCTGATTAATTGTTTTACGCGTGCGTTTGTGTGGATTGTAGGACAAGGCTCCCTATGTAGC |
| jingnuo2  | ATGGACTAGAAATCTCGTGCTGATTAATTGTTTTACGCGTGCGTTTGTGTGGATTGTAGGACAAGGCTCCCTATGTAGC |

| Lines      | Sequence                                                                        |
|------------|---------------------------------------------------------------------------------|
| song1145   | TTGGACTAGAAATCTCGTGCTGATTAATTGTTTTACGCGTGCGTTTGTGTGGATTGTAGGACAAGGCTCCCTATGTAGC |
| zun90110   | TTGGACTAGAAATCTCGTGCTGATTAATTGTTTTACGCGTGCGTTTGTGTGGATTGTAGGACAAGGCTCCCTATGTAGC |
| cheng435   | TTGGACTAGAAATCTCGTGCTGATTAATTGTTTTACGCGTGCGTTTGTGTGGATTGTAGGACAAGGCTCCCTATGTAGC |
| 79028      | TTGGACTAGAAATCTCGTGCTGATTAATTGTTTTACGCGTGCGTTTGTGTGGATTGTAGGACAAGGCTCCCTATGTAGC |
| H2         | ATGGACTAGAAATCTCGTGCTGATTAATTGTTTTACGCGTGCGTTTGTGTGGATTGTAGGACAAGGCTCCCTATGTAGC |
| tai184     | TTGGACTAGAAATCTCGTGCTGATTAATTGTTTTACGCGTGCGTTTGTGTGGATTGTAGGACAAGGCTCCCTATGTAGC |
| ziduosui   | TTGGACTAGAAATCTCGTGCTGATTAATTGTTTTACGCGTGCGTTTGTGTGGATTGTAGGACAAGGCTCCCTATGTAGC |
| xuan6      | TTGGACTAGAAATCTCGTGCTGATTAATTGTTTTACGCGTGCGTTTGTGTGGATTGTAGGACAAGGCTCCCTATGTAGC |
| lan766-4-2 | ATGGACTAGAAATCTCGTGCTGATTAATTGTTTTACGCGTGCGTTTGTGTGGATTGTAGGACAAGGCTCCCTATGTAGC |
| chi545     | ATGGACTAGAAATCTCGTGCTGATTAATTGTTTTACGCGTGCGTTTGTGTGGATTGTAGGACAAGGCTCCCTATGTAGC |
| 85bai64    | TTGGACTAGAAATCTCGTGCTGATTAATTGTTTTACGCGTGCGTTTGTGTGGATTGTAGGACAAGGCTCCCTATGTAGC |
| 91huang5   | TTGGACTAGAAATCTCGTGCTGATTAATTGTTTTACGCGTGCGTTTGTGTGGATTGTAGGACAAGGCTCCCTATGTAGC |
| 91huang10  | TTGGACTAGAAATCTCGTGCTGATTAATTGTTTTACGCGTGCGTTTGTGTGGATTGTAGGACAAGGCTCCCTATGTAGC |
| chihuang14 | TTGGACTAGAAATCTCGTGCTGATTAATTGTTTTACGCGTGCGTTTGTGTGGATTGTAGGACAAGGCTCCCTATGTAGC |
| chihuang32 | TTGGACTAGAAATCTCGTGCTGATTAATTGTTTTACGCGTGCGTTTGTGTGGATTGTAGGACAAGGCTCCCTATGTAGC |
| 785        | TTGGACTAGAAATCTCGTGCTGATTAATTGTTTTACGCGTGCGTTTGTGTGGATTGTAGGACAAGGCTCCCTATGTAGC |
| liao4271   | TTGGACTAGAAATCTCGTGCTGATTAATTGTTTTACGCGTGCGTTTGTGTGGATTGTAGGACAAGGCTCCCTATGTAGC |
| fu96       | TTGGACTAGAAATCTCGTGCTGATTAATTGTTTTACGCGTGCGTTTGTGTGGATTGTAGGACAAGGCTCCCTATGTAGC |
| ji833      | TTGGACTAGAAATCTCGTGCTGATTAATTGTTTTACGCGTGCGTTTGTGTGGATTGTAGGACAAGGCTCCCTATGTAGC |
| ji870      | ATGGACTAGAAATCTCGTGCTGATTAATTGTTTTACGCGTGCGTTTGTGTGGATTGTAGGACAAGGCTCCCTATGTAGC |
| fu8521     | TTGGACTAGAAATCTCGTGCTGATTAATTGTTTTACGCGTGCGTTTGTGTGGATTGTAGGACAAGGCTCCCTATGTAGC |
| fu8527     | TTGGACTAGAAATCTCGTGCTGATTAATTGTTTTACGCGTGCGTTTGTGTGGATTGTAGGACAAGGCTCCCTATGTAGC |

| Lines     | Sequence                                                                        |
|-----------|---------------------------------------------------------------------------------|
| fu8538    | TTGGACTAGAAATCTCGTGCTGATTAATTGTTTTACGCGTGCGTTTGTGTGGATTGTAGGACAAGGCTCCCTATGTAGC |
| longkang1 | TTGGACTAGAAATCTCGTGCTGATTAATTGTTTTACGCGTGCGTTTGTGTGGATTGTAGGACAAGGCTCCCTATGTAGC |
| yan172    | TTGGACTAGAAATCTCGTGCTGATTAATTGTTTTACGCGTGCGTTTGTGTGGATTGTAGGACAAGGCTCCCTATGTAGC |
| dai6      | TTGGACTAGAAATCTCGTGCTGATTAATTGTTTTACGCGTGCGTTTGTGTGGATTGTAGGACAAGGCTCCCTATGTAGC |
| qi410     | ATGGACTAGAAATCTCGTGCTGATTAATTGTTTTACGCGTGCGTTTGTGTGGATTGTAGGACAAGGCTCCCTATGTAGC |
| 32        | TTGGACTAGAAATCTCGTGCTGATTAATTGTTTTACGCGTGCGTTTGTGTGGATTGTAGGACAAGGCTCCCTATGTAGC |
| yue39-4   | TTGGACTAGAAATCTCGTGCTGATTAATTGTTTTACGCGTGCGTTTGTGTGGATTGTAGGACAAGGCTCCCTATGTAGC |
| Cwu215B   | TTGGACTAGAAATCTCGTGCTGATTAATTGTTTTACGCGTGCGTTTGTGTGGATTGTAGGACAAGGCTCCCTATGTAGC |
| SZ3       | ATGGACTAGAAATCTCGTGCTGATTAATTGTTTTACGCGTGCGTTTGTGTGGATTGTAGGACAAGGCTCCCTATGTAGC |
| S001      | TTGGACTAGAAATCTCGTGCTGATTAATTGTTTTACGCGTGCGTTTGTGTGGATTGTAGGACAAGGCTCCCTATGTAGC |
| wei3322   | TTGGACTAGAAATCTCGTGCTGATTAATTGTTTTACGCGTGCGTTTGTGTGGATTGTAGGACAAGGCTCCCTATGTAGC |
| ning45    | TTGGACTAGAAATCTCGTGCTGATTAATTGTTTTACGCGTGCGTTTGTGTGGATTGTAGGACAAGGCTCCCTATGTAGC |
| ning55    | TTGGACTAGAAATCTCGTGCTGATTAATTGTTTTACGCGTGCGTTTGTGTGGATTGTAGGACAAGGCTCCCTATGTAGC |
| H66/6     | TTGGACTAGAAATCTCGTGCTGATTAATTGTTTTACGCGTGCGTTTGTGTGGATTGTAGGACAAGGCTCCCTATGTAGC |
| 72-125    | TTGGACTAGAAATCTCGTGCTGATTAATTGTTTTACGCGTGCGTTTGTGTGGATTGTAGGACAAGGCTCCCTATGTAGC |
| C103      | TTGGACTAGAAATCTCGTGCTGATTAATTGTTTTACGCGTGCGTTTGTGTGGATTGTAGGACAAGGCTCCCTATGTAGC |
| hua160    | ATGGACTAGAAATCTCGTGCTGATTAATTGTTTTACGCGTGCGTTTGTGTGGATTGTAGGACAAGGCTCCCTATGTAGC |
| ES40      | TTGGACTAGAAATCTCGTGCTGATTAATTGTTTTACGCGTGCGTTTGTGTGGATTGTAGGACAAGGCTCCCTATGTAGC |
| 78002A    | TTGGACTAGAAATCTCGTGCTGATTAATTGTTTTACGCGTGCGTTTGTGTGGATTGTAGGACAAGGCTCCCTATGTAGC |
| B47       | ATGGACTAGAAATCTCGTGCTGATTAATTGTTTTACGCGTGCGTTTGTGTGGATTGTAGGACAAGGCTCCCTATGTAGC |
| LH156     | TTGGACTAGAAATCTCGTGCTGATTAATTGTTTTACGCGTGCGTTTGTGTGGATTGTAGGACAAGGCTCCCTATGTAGC |
| PHZ51     | TTGGACTAGAAATCTCGTGCTGATTAATTGTTTTACGCGTGCGTTTGTGTGGATTGTAGGACAAGGCTCCCTATGTAGC |



| Lines   | Sequence                                                                        |
|---------|---------------------------------------------------------------------------------|
| LPINRHT | TTGGACTAGAAATCTCGTGCTGATTAATTGTTTTACGCGTGCGTTTGTGTGGATTGTAGGACAAGGCTCCCTATGTAGC |
| PHJ75   | TTGGACTAGAAATCTCGTGCTGATTAATTGTTTTACGCGTGCGTTTGTGTGGATTGTAGGACAAGGCTCCCTATGTAGC |
| PHM57   | ATGGACTAGAAATCTCGTGCTGATTAATTGTTTTACGCGTGCGTTTGTGTGGATTGTAGGACAAGGCTCCCTATGTAGC |
| PHW03   | ATGGACTAGAAATCTCGTGCTGATTAATTGTTTTACGCGTGCGTTTGTGTGGATTGTAGGACAAGGCTCCCTATGTAGC |
| PHK05   | ATGGACTAGAAATCTCGTGCTGATTAATTGTTTTACGCGTGCGTTTGTGTGGATTGTAGGACAAGGCTCCCTATGTAGC |
| PHR25   | ATGGACTAGAAATCTCGTGCTGATTAATTGTTTTACGCGTGCGTTTGTGTGGATTGTAGGACAAGGCTCCCTATGTAGC |
| LH60    | TTGGACTAGAAATCTCGTGCTGATTAATTGTTTTACGCGTGCGTTTGTGTGGATTGTAGGACAAGGCTCCCTATGTAGC |
| PHK76   | TTGGACTAGAAATCTCGTGCTGATTAATTGTTTTACGCGTGCGTTTGTGTGGATTGTAGGACAAGGCTCCCTATGTAGC |
| PHG35   | TTGGACTAGAAATCTCGTGCTGATTAATTGTTTTACGCGTGCGTTTGTGTGGATTGTAGGACAAGGCTCCCTATGTAGC |
| LH59    | TTGGACTAGAAATCTCGTGCTGATTAATTGTTTTACGCGTGCGTTTGTGTGGATTGTAGGACAAGGCTCCCTATGTAGC |
| LH123HT | TTGGACTAGAAATCTCGTGCTGATTAATTGTTTTACGCGTGCGTTTGTGTGGATTGTAGGACAAGGCTCCCTATGTAGC |
| LH38    | TTGGACTAGAAATCTCGTGCTGATTAATTGTTTTACGCGTGCGTTTGTGTGGATTGTAGGACAAGGCTCCCTATGTAGC |
| PHK42   | ATGGACTAGAAATCTCGTGCTGATTAATTGTTTTACGCGTGCGTTTGTGTGGATTGTAGGACAAGGCTCCCTATGTAGC |
| 78010   | TTGGACTAGAAATCTCGTGCTGATTAATTGTTTTACGCGTGCGTTTGTGTGGATTGTAGGACAAGGCTCCCTATGTAGC |
| HB8229  | TTGGACTAGAAATCTCGTGCTGATTAATTGTTTTACGCGTGCGTTTGTGTGGATTGTAGGACAAGGCTCCCTATGTAGC |
| PHR32   | ATGGACTAGAAATCTCGTGCTGATTAATTGTTTTACGCGTGCGTTTGTGTGGATTGTAGGACAAGGCTCCCTATGTAGC |
| PHT10   | TTGGACTAGAAATCTCGTGCTGATTAATTGTTTTACGCGTGCGTTTGTGTGGATTGTAGGACAAGGCTCCCTATGTAGC |
| LH1     | TTGGACTAGAAATCTCGTGCTGATTAATTGTTTTACGCGTGCGTTTGTGTGGATTGTAGGACAAGGCTCCCTATGTAGC |
| 790     | TTGGACTAGAAATCTCGTGCTGATTAATTGTTTTACGCGTGCGTTTGTGTGGATTGTAGGACAAGGCTCCCTATGTAGC |
| PHG47   | TTGGACTAGAAATCTCGTGCTGATTAATTGTTTTACGCGTGCGTTTGTGTGGATTGTAGGACAAGGCTCCCTATGTAGC |
| LH39    | TTGGACTAGAAATCTCGTGCTGATTAATTGTTTTACGCGTGCGTTTGTGTGGATTGTAGGACAAGGCTCCCTATGTAGC |
| LH127   | TTGGACTAGAAATCTCGTGCTGATTAATTGTTTTACGCGTGCGTTTGTGTGGATTGTAGGACAAGGCTCCCTATGTAGC |

| Lines  | Sequence                                                                        |
|--------|---------------------------------------------------------------------------------|
| LH191  | TTGGACTAGAAATCTCGTGCTGATTAATTGTTTTACGCGTGCGTTTGTGTGGATTGTAGGACAAGGCTCCCTATGTAGC |
| LH193  | TTGGACTAGAAATCTCGTGCTGATTAATTGTTTTACGCGTGCGTTTGTGTGGATTGTAGGACAAGGCTCCCTATGTAGC |
| RS710  | TTGGACTAGAAATCTCGTGCTGATTAATTGTTTTACGCGTGCGTTTGTGTGGATTGTAGGACAAGGCTCCCTATGTAGC |
| BCC03  | ATGGACTAGAAATCTCGTGCTGATTAATTGTTTTACGCGTGCGTTTGTGTGGATTGTAGGACAAGGCTCCCTATGTAGC |
| LH128  | TTGGACTAGAAATCTCGTGCTGATTAATTGTTTTACGCGTGCGTTTGTGTGGATTGTAGGACAAGGCTCCCTATGTAGC |
| PHM81  | ATGGACTAGAAATCTCGTGCTGATTAATTGTTTTACGCGTGCGTTTGTGTGGATTGTAGGACAAGGCTCCCTATGTAGC |
| PHR55  | TTGGACTAGAAATCTCGTGCTGATTAATTGTTTTACGCGTGCGTTTGTGTGGATTGTAGGACAAGGCTCCCTATGTAGC |
| PHP85  | TTGGACTAGAAATCTCGTGCTGATTAATTGTTTTACGCGTGCGTTTGTGTGGATTGTAGGACAAGGCTCCCTATGTAGC |
| 6103   | TTGGACTAGAAATCTCGTGCTGATTAATTGTTTTACGCGTGCGTTTGTGTGGATTGTAGGACAAGGCTCCCTATGTAGC |
| MBNA   | TTGGACTAGAAATCTCGTGCTGATTAATTGTTTTACGCGTGCGTTTGTGTGGATTGTAGGACAAGGCTCCCTATGTAGC |
| 4676A  | ATGGACTAGAAATCTCGTGCTGATTAATTGTTTTACGCGTGCGTTTGTGTGGATTGTAGGACAAGGCTCCCTATGTAGC |
| IB02   | TTGGACTAGAAATCTCGTGCTGATTAATTGTTTTACGCGTGCGTTTGTGTGGATTGTAGGACAAGGCTCCCTATGTAGC |
| 787    | ATGGACTAGAAATCTCGTGCTGATTAATTGTTTTACGCGTGCGTTTGTGTGGATTGTAGGACAAGGCTCCCTATGTAGC |
| 11430  | TTGGACTAGAAATCTCGTGCTGATTAATTGTTTTACGCGTGCGTTTGTGTGGATTGTAGGACAAGGCTCCCTATGTAGC |
| 2MA22  | TTGGACTAGAAATCTCGTGCTGATTAATTGTTTTACGCGTGCGTTTGTGTGGATTGTAGGACAAGGCTCCCTATGTAGC |
| 6M502  | TTGGACTAGAAATCTCGTGCTGATTAATTGTTTTACGCGTGCGTTTGTGTGGATTGTAGGACAAGGCTCCCTATGTAGC |
| 87916W | TTGGACTAGAAATCTCGTGCTGATTAATTGTTTTACGCGTGCGTTTGTGTGGATTGTAGGACAAGGCTCCCTATGTAGC |
| PHN47  | ATGGACTAGAAATCTCGTGCTGATTAATTGTTTTACGCGTGCGTTTGTGTGGATTGTAGGACAAGGCTCCCTATGTAGC |
| NS501  | ATGGACTAGAAATCTCGTGCTGATTAATTGTTTTACGCGTGCGTTTGTGTGGATTGTAGGACAAGGCTCCCTATGTAGC |
| H8431  | TTGGACTAGAAATCTCGTGCTGATTAATTGTTTTACGCGTGCGTTTGTGTGGATTGTAGGACAAGGCTCCCTATGTAGC |
| S8324  | TTGGACTAGAAATCTCGTGCTGATTAATTGTTTTACGCGTGCGTTTGTGTGGATTGTAGGACAAGGCTCCCTATGTAGC |
| WIL500 | TTGGACTAGAAATCTCGTGCTGATTAATTGTTTTACGCGTGCGTTTGTGTGGATTGTAGGACAAGGCTCCCTATGTAGC |

| Lines     | Sequence                                                                        |
|-----------|---------------------------------------------------------------------------------|
| E8501     | TTGGACTAGAAATCTCGTGCTGATTAATTGTTTTACGCGTGCGTTTGTGTGGATTGTAGGACAAGGCTCCCTATGTAGC |
| J8606     | TTGGACTAGAAATCTCGTGCTGATTAATTGTTTTACGCGTGCGTTTGTGTGGATTGTAGGACAAGGCTCCCTATGTAGC |
| 4N506     | TTGGACTAGAAATCTCGTGCTGATTAATTGTTTTACGCGTGCGTTTGTGTGGATTGTAGGACAAGGCTCCCTATGTAGC |
| PHJ33     | TTGGACTAGAAATCTCGTGCTGATTAATTGTTTTACGCGTGCGTTTGTGTGGATTGTAGGACAAGGCTCCCTATGTAGC |
| PHN82     | TTGGACTAGAAATCTCGTGCTGATTAATTGTTTTACGCGTGCGTTTGTGTGGATTGTAGGACAAGGCTCCCTATGTAGC |
| PHP55     | TTGGACTAGAAATCTCGTGCTGATTAATTGTTTTACGCGTGCGTTTGTGTGGATTGTAGGACAAGGCTCCCTATGTAGC |
| PHT22     | TTGGACTAGAAATCTCGTGCTGATTAATTGTTTTACGCGTGCGTTTGTGTGGATTGTAGGACAAGGCTCCCTATGTAGC |
| W23       | TTGGACTAGAAATCTCGTGCTGATTAATTGTTTTACGCGTGCGTTTGTGTGGATTGTAGGACAAGGCTCCCTATGTAGC |
| 478       | TTGGACTAGAAATCTCGTGCTGATTAATTGTTTTACGCGTGCGTTTGTGTGGATTGTAGGACAAGGCTCCCTATGTAGC |
| D340      | TTGGACTAGAAATCTCGTGCTGATTAATTGTTTTACGCGTGCGTTTGTGTGGATTGTAGGACAAGGCTCCCTATGTAGC |
| He344     | TTGGACTAGAAATCTCGTGCTGATTAATTGTTTTACGCGTGCGTTTGTGTGGATTGTAGGACAAGGCTCCCTATGTAGC |
| F939      | TTGGACTAGAAATCTCGTGCTGATTAATTGTTTTACGCGTGCGTTTGTGTGGATTGTAGGACAAGGCTCCCTATGTAGC |
| Luyuan133 | ATGGACTAGAAATCTCGTGCTGATTAATTGTTTTACGCGTGCGTTTGTGTGGATTGTAGGACAAGGCTCCCTATGTAGC |
| 778       | TTGGACTAGAAATCTCGTGCTGATTAATTGTTTTACGCGTGCGTTTGTGTGGATTGTAGGACAAGGCTCCCTATGTAGC |
| LH146HT   | TTGGACTAGAAATCTCGTGCTGATTAATTGTTTTACGCGTGCGTTTGTGTGGATTGTAGGACAAGGCTCCCTATGTAGC |
| PHR62     | TTGGACTAGAAATCTCGTGCTGATTAATTGTTTTACGCGTGCGTTTGTGTGGATTGTAGGACAAGGCTCCCTATGTAGC |
| B84       | TTGGACTAGAAATCTCGTGCTGATTAATTGTTTTACGCGTGCGTTTGTGTGGATTGTAGGACAAGGCTCCCTATGTAGC |
| B87       | ATGGACTAGAAATCTCGTGCTGATTAATTGTTTTACGCGTGCGTTTGTGTGGATTGTAGGACAAGGCTCCCTATGTAGC |
| ILL12E    | TTGGACTAGAAATCTCGTGCTGATTAATTGTTTTACGCGTGCGTTTGTGTGGATTGTAGGACAAGGCTCCCTATGTAGC |
| 黑龙江红玉米    | TTGGACTAGAAATCTCGTGCTGATTAATTGTTTTACGCGTGCGTTTGTGTGGATTGTAGGACAAGGCTCCCTATGTAGC |
| Dian11    | TTGGACTAGAAATCTCGTGCTGATTAATTGTTTTACGCGTGCGTTTGTGTGGATTGTAGGACAAGGCTCCCTATGTAGC |
| HR295     | TTGGACTAGAAATCTCGTGCTGATTAATTGTTTTACGCGTGCGTTTGTGTGGATTGTAGGACAAGGCTCCCTATGTAGC |

| Lines      | Sequence                                                                        |
|------------|---------------------------------------------------------------------------------|
| 2001-F22   | TTGGACTAGAAATCTCGTGCTGATTAATTGTTTTACGCGTGCGTTTGTGTGGATTGTAGGACAAGGCTCCCTATGTAGC |
| KN3        | TTGGACTAGAAATCTCGTGCTGATTAATTGTTTTACGCGTGCGTTTGTGTGGATTGTAGGACAAGGCTCCCTATGTAGC |
| M5911      | TTGGACTAGAAATCTCGTGCTGATTAATTGTTTTACGCGTGCGTTTGTGTGGATTGTAGGACAAGGCTCCCTATGTAGC |
| HR78       | TTGGACTAGAAATCTCGTGCTGATTAATTGTTTTACGCGTGCGTTTGTGTGGATTGTAGGACAAGGCTCCCTATGTAGC |
| 中农大 788-父本 | TTGGACTAGAAATCTCGTGCTGATTAATTGTTTTACGCGTGCGTTTGTGTGGATTGTAGGACAAGGCTCCCTATGTAGC |
| SC-14      | TTGGACTAGAAATCTCGTGCTGATTAATTGTTTTACGCGTGCGTTTGTGTGGATTGTAGGACAAGGCTCCCTATGTAGC |
| XF117      | ATGGACTAGAAATCTCGTGCTGATTAATTGTTTTACGCGTGCGTTTGTGTGGATTGTAGGACAAGGCTCCCTATGTAGC |
| XF197      | TTGGACTAGAAATCTCGTGCTGATTAATTGTTTTACGCGTGCGTTTGTGTGGATTGTAGGACAAGGCTCCCTATGTAGC |
| C8605-2    | TTGGACTAGAAATCTCGTGCTGATTAATTGTTTTACGCGTGCGTTTGTGTGGATTGTAGGACAAGGCTCCCTATGTAGC |
| 沿 812      | TTGGACTAGAAATCTCGTGCTGATTAATTGTTTTACGCGTGCGTTTGTGTGGATTGTAGGACAAGGCTCCCTATGTAGC |
| D881       | TTGGACTAGAAATCTCGTGCTGATTAATTGTTTTACGCGTGCGTTTGTGTGGATTGTAGGACAAGGCTCCCTATGTAGC |
| Z31B       | ATGGACTAGAAATCTCGTGCTGATTAATTGTTTTACGCGTGCGTTTGTGTGGATTGTAGGACAAGGCTCCCTATGTAGC |
| 齐 319      | TTGGACTAGAAATCTCGTGCTGATTAATTGTTTTACGCGTGCGTTTGTGTGGATTGTAGGACAAGGCTCCCTATGTAGC |
| 441950     | ATGGACTAGAAATCTCGTGCTGATTAATTGTTTTACGCGTGCGTTTGTGTGGATTGTAGGACAAGGCTCCCTATGTAGC |
| 802        | TTGGACTAGAAATCTCGTGCTGATTAATTGTTTTACGCGTGCGTTTGTGTGGATTGTAGGACAAGGCTCCCTATGTAGC |
| 68202      | TTGGACTAGAAATCTCGTGCTGATTAATTGTTTTACGCGTGCGTTTGTGTGGATTGTAGGACAAGGCTCCCTATGTAGC |
| 黄野四        | TTGGACTAGAAATCTCGTGCTGATTAATTGTTTTACGCGTGCGTTTGTGTGGATTGTAGGACAAGGCTCCCTATGTAGC |
| Ay3566     | TTGGACTAGAAATCTCGTGCTGATTAATTGTTTTACGCGTGCGTTTGTGTGGATTGTAGGACAAGGCTCCCTATGTAGC |
| 2005       | TTGGACTAGAAATCTCGTGCTGATTAATTGTTTTACGCGTGCGTTTGTGTGGATTGTAGGACAAGGCTCCCTATGTAGC |
| 凤可 1       | TTGGACTAGAAATCTCGTGCTGATTAATTGTTTTACGCGTGCGTTTGTGTGGATTGTAGGACAAGGCTCCCTATGTAGC |
| 宗 548-1521 | TTGGACTAGAAATCTCGTGCTGATTAATTGTTTTACGCGTGCGTTTGTGTGGATTGTAGGACAAGGCTCCCTATGTAGC |
| Timpunia-1 | TTGGACTAGAAATCTCGTGCTGATTAATTGTTTTACGCGTGCGTTTGTGTGGATTGTAGGACAAGGCTCCCTATGTAGC |

| Lines   | Sequence                                                                        |
|---------|---------------------------------------------------------------------------------|
| H114    | TTGGACTAGAAATCTCGTGCTGATTAATTGTTTTACGCGTGCGTTTGTGTGGATTGTAGGACAAGGCTCCCTATGTAGC |
| PHJ70   | TTGGACTAGAAATCTCGTGCTGATTAATTGTTTTACGCGTGCGTTTGTGTGGATTGTAGGACAAGGCTCCCTATGTAGC |
| LH160   | ATGGACTAGAAATCTCGTGCTGATTAATTGTTTTACGCGTGCGTTTGTGTGGATTGTAGGACAAGGCTCCCTATGTAGC |
| MBPM    | TTGGACTAGAAATCTCGTGCTGATTAATTGTTTTACGCGTGCGTTTGTGTGGATTGTAGGACAAGGCTCCCTATGTAGC |
| LH82    | TTGGACTAGAAATCTCGTGCTGATTAATTGTTTTACGCGTGCGTTTGTGTGGATTGTAGGACAAGGCTCCCTATGTAGC |
| 78371A  | TTGGACTAGAAATCTCGTGCTGATTAATTGTTTTACGCGTGCGTTTGTGTGGATTGTAGGACAAGGCTCCCTATGTAGC |
| PHR47   | TTGGACTAGAAATCTCGTGCTGATTAATTGTTTTACGCGTGCGTTTGTGTGGATTGTAGGACAAGGCTCCCTATGTAGC |
| LH194   | TTGGACTAGAAATCTCGTGCTGATTAATTGTTTTACGCGTGCGTTTGTGTGGATTGTAGGACAAGGCTCCCTATGTAGC |
| MBUB    | TTGGACTAGAAATCTCGTGCTGATTAATTGTTTTACGCGTGCGTTTGTGTGGATTGTAGGACAAGGCTCCCTATGTAGC |
| NS701   | TTGGACTAGAAATCTCGTGCTGATTAATTGTTTTACGCGTGCGTTTGTGTGGATTGTAGGACAAGGCTCCCTATGTAGC |
| PHN37   | TTGGACTAGAAATCTCGTGCTGATTAATTGTTTTACGCGTGCGTTTGTGTGGATTGTAGGACAAGGCTCCCTATGTAGC |
| PHW20   | TTGGACTAGAAATCTCGTGCTGATTAATTGTTTTACGCGTGCGTTTGTGTGGATTGTAGGACAAGGCTCCCTATGTAGC |
| 2FACC   | TTGGACTAGAAATCTCGTGCTGATTAATTGTTTTACGCGTGCGTTTGTGTGGATTGTAGGACAAGGCTCCCTATGTAGC |
| B78     | TTGGACTAGAAATCTCGTGCTGATTAATTGTTTTACGCGTGCGTTTGTGTGGATTGTAGGACAAGGCTCCCTATGTAGC |
| B127    | TTGGACTAGAAATCTCGTGCTGATTAATTGTTTTACGCGTGCGTTTGTGTGGATTGTAGGACAAGGCTCCCTATGTAGC |
| LH244   | TTGGACTAGAAATCTCGTGCTGATTAATTGTTTTACGCGTGCGTTTGTGTGGATTGTAGGACAAGGCTCCCTATGTAGC |
| P178    | TTGGACTAGAAATCTCGTGCTGATTAATTGTTTTACGCGTGCGTTTGTGTGGATTGTAGGACAAGGCTCCCTATGTAGC |
| Dong237 | TTGGACTAGAAATCTCGTGCTGATTAATTGTTTTACGCGTGCGTTTGTGTGGATTGTAGGACAAGGCTCCCTATGTAGC |
