# Supplementary material for: High-Throughput and Accurate Determination of Transgene Copy Number and Zygosity in Transgenic Maize: From DNA Extraction to Data Analysis
Source: MDPI journal article supplement (doi:10.3390/ijms222212487), 2021-11-19
Supplement: s1 [file s1]

**Table S3.** Comparison of *bar* copy numbers estimated by TaqMan, dPCR and Southern blot assays for eight T<sub>0</sub> plants. For dPCR assay, the undigested DNA is analyzed and repeated once (r = 1).

| Transgenic<br>Lines | Ratio<br>(target/ref) | Estimated Copy Number<br>by dPCR | Estimated Copy Number<br>by TaqMan Assay | Estimated Copy Number<br>by Southern Blots |
|---------------------|-----------------------|----------------------------------|------------------------------------------|--------------------------------------------|
| 12151398            | 0.94                  | 1                                | 1                                        | 1                                          |
| 13181646            | 1.09                  | 1                                | 1                                        | 2                                          |
| 13201830            | 0.94                  | 1                                | 1                                        | 2                                          |
| 12060612            | 2.67                  | 3                                | 3                                        | 2                                          |
| 12080815            | 1.06                  | 1                                | 1                                        | 1                                          |
| 12040220            | 1.94                  | 2                                | 2                                        | 3                                          |
| 12060631            | 1.86                  | 2                                | 2                                        | 2                                          |
| 12040234            | 0.72                  | 1                                | 1                                        | 1                                          |

Notes: target, transgene *bar*; ref, endogenous gene *hmg*.
