# Supplementary material for: High-Throughput and Accurate Determination of Transgene Copy Number and Zygosity in Transgenic Maize: From DNA Extraction to Data Analysis
Source: MDPI journal article supplement (doi:10.3390/ijms222212487), 2021-11-19
Supplement: s1 [file s1]

**Table S4.** Copy numbers of 4,409 T0 samples with three technical repetitions for random sample analysis.

| Sample ID | Copy Number           |                          |                       |                          |                       |                          |                       |                          |
|-----------|-----------------------|--------------------------|-----------------------|--------------------------|-----------------------|--------------------------|-----------------------|--------------------------|
|           | r = 1                 |                          | r = 2                 |                          | r = 3                 |                          | Average               |                          |
|           | Ratio<br>(target/ref) | Estimated<br>Copy Number |
| 13030002  | 1.26                  | 1                        | 1.21                  | 1                        | 1.22                  | 1                        | 1.23                  | 1                        |
| 13030004  | 3.45                  | 3                        | 2.74                  | 3                        | 3.21                  | 3                        | 3.13                  | 3                        |
| 13030005  | 4.96                  | 5                        | 6.91                  | 7                        | 4.93                  | 5                        | 5.60                  | 6                        |
| 13030009  | 1.03                  | 1                        | 0.98                  | 1                        | 0.95                  | 1                        | 0.99                  | 1                        |
| 13030012  | 0.03                  | 0                        | 0.02                  | 0                        | 0.02                  | 0                        | 0.03                  | 0                        |
| 13030013  | 0.13                  | 0                        | 0.13                  | 0                        | 0.22                  | 0                        | 0.16                  | 0                        |
| 13030014  | 0.08                  | 0                        | 0.11                  | 0                        | 0.12                  | 0                        | 0.10                  | 0                        |
| 13030015  | 2.76                  | 3                        | 2.51                  | 3                        | 2.78                  | 3                        | 2.68                  | 3                        |
| 13040005  | 2.73                  | 3                        | 3.16                  | 3                        | 3.17                  | 3                        | 3.02                  | 3                        |
| 13040007  | 0.58                  | 1                        | 0.64                  | 1                        | 0.48                  | 0                        | 0.57                  | 1                        |
| 13040011  | 0.02                  | 0                        | 0.02                  | 0                        | 0.00                  | 0                        | 0.01                  | 0                        |
| 13040012  | 0.05                  | 0                        | 0.03                  | 0                        | 0.00                  | 0                        | 0.03                  | 0                        |
| 13040019  | 1.18                  | 1                        | 1.36                  | 1                        | 0.10                  | 0                        | 0.88                  | 1                        |
| 13212002  | 1.34                  | 1                        | 1.07                  | 1                        | 0.96                  | 1                        | 1.12                  | 1                        |
| 13212003  | 1.84                  | 2                        | 1.67                  | 2                        | 1.77                  | 2                        | 1.76                  | 2                        |
| 13217007  | 1.65                  | 2                        | 1.85                  | 2                        | 1.73                  | 2                        | 1.74                  | 2                        |
| 13480206  | 4.11                  | 4                        | 4.84                  | 5                        | 4.39                  | 4                        | 4.45                  | 4                        |

| Sample ID | Copy Number           |                          |                       |                          |                       |                          |                       |                          |
|-----------|-----------------------|--------------------------|-----------------------|--------------------------|-----------------------|--------------------------|-----------------------|--------------------------|
|           | r = 1                 |                          | r = 2                 |                          | r = 3                 |                          | Average               |                          |
|           | Ratio<br>(target/ref) | Estimated<br>Copy Number |
| 13480268  | 5.71                  | 6                        | 4.31                  | 4                        | 4.84                  | 5                        | 4.95                  | 5                        |
| 13480841  | 1.26                  | 1                        | 1.19                  | 1                        | 1.14                  | 1                        | 1.20                  | 1                        |
| 13490037  | 1.42                  | 1                        | 1.28                  | 1                        | 1.19                  | 1                        | 1.29                  | 1                        |
| 13490075  | 3.53                  | 4                        | 3.45                  | 3                        | 3.60                  | 4                        | 3.52                  | 4                        |
| 13490113  | 5.34                  | 5                        | 5.60                  | 6                        | 5.19                  | 5                        | 5.38                  | 5                        |
| 13490195  | 1.05                  | 1                        | 1.26                  | 1                        | 1.26                  | 1                        | 1.19                  | 1                        |
| 13500049  | 6.58                  | 7                        | 5.72                  | 6                        | 5.65                  | 6                        | 5.98                  | 6                        |
| 13500111  | 1.06                  | 1                        | 1.15                  | 1                        | 1.15                  | 1                        | 1.12                  | 1                        |
| 13500132  | 1.28                  | 1                        | 1.24                  | 1                        | 1.45                  | 1                        | 1.33                  | 1                        |
| 13500313  | 4.63                  | 5                        | 4.39                  | 4                        | 4.61                  | 5                        | 4.54                  | 5                        |
| 13500323  | 1.17                  | 1                        | 1.17                  | 1                        | 1.27                  | 1                        | 1.20                  | 1                        |
| 13500363  | 1.38                  | 1                        | 1.48                  | 1                        | 1.65                  | 2                        | 1.51                  | 2                        |
| 13500380  | 1.06                  | 1                        | 1.22                  | 1                        | 1.40                  | 1                        | 1.22                  | 1                        |
| 13500449  | 2.22                  | 2                        | 2.56                  | 3                        | 1.92                  | 2                        | 2.23                  | 2                        |
| 13500602  | 2.05                  | 2                        | 1.67                  | 2                        | 1.98                  | 2                        | 1.90                  | 2                        |
| 13500723  | 4.67                  | 5                        | 4.60                  | 5                        | 6.17                  | 6                        | 5.15                  | 5                        |
| 13500754  | 2.85                  | 3                        | 3.11                  | 3                        | 3.35                  | 3                        | 3.10                  | 3                        |
| 13500880  | 1.33                  | 1                        | 1.18                  | 1                        | 1.21                  | 1                        | 1.24                  | 1                        |
| 13501030  | 4.42                  | 4                        | 4.38                  | 4                        | 4.52                  | 5                        | 4.44                  | 4                        |

| Sample ID | Copy Number           |                          |                       |                          |                       |                          |                       |                          |
|-----------|-----------------------|--------------------------|-----------------------|--------------------------|-----------------------|--------------------------|-----------------------|--------------------------|
|           | r = 1                 |                          | r = 2                 |                          | r = 3                 |                          | Average               |                          |
|           | Ratio<br>(target/ref) | Estimated<br>Copy Number |
| 13501065  | 3.68                  | 4                        | 3.31                  | 3                        | 3.63                  | 4                        | 3.54                  | 4                        |
| 13510230  | 2.05                  | 2                        | 1.71                  | 2                        | 1.89                  | 2                        | 1.89                  | 2                        |
| 13510373  | 2.11                  | 2                        | 1.82                  | 2                        | 1.99                  | 2                        | 1.97                  | 2                        |
| 13510439  | 1.99                  | 2                        | 2.41                  | 2                        | 2.43                  | 2                        | 2.28                  | 2                        |
| 13510459  | 1.52                  | 2                        | 1.61                  | 2                        | 1.59                  | 2                        | 1.58                  | 2                        |
| 13510626  | 1.27                  | 1                        | 0.99                  | 1                        | 1.01                  | 1                        | 1.09                  | 1                        |
| 13510627  | 1.24                  | 1                        | 1.22                  | 1                        | 1.47                  | 1                        | 1.31                  | 1                        |
| 13510684  | 2.52                  | 3                        | 2.45                  | 2                        | 2.21                  | 2                        | 2.39                  | 2                        |
| 13510688  | 2.04                  | 2                        | 1.28                  | 1                        | 1.60                  | 2                        | 1.64                  | 2                        |
| 13510869  | 1.37                  | 1                        | 1.56                  | 2                        | 1.28                  | 1                        | 1.40                  | 1                        |
| 13520100  | 2.11                  | 2                        | 1.86                  | 2                        | 1.68                  | 2                        | 1.88                  | 2                        |
| 13520205  | 3.47                  | 3                        | 4.02                  | 4                        | 3.83                  | 4                        | 3.77                  | 4                        |
| 13520217  | 1.41                  | 1                        | 1.36                  | 1                        | 1.42                  | 1                        | 1.39                  | 1                        |
| 13520295  | 2.02                  | 2                        | 1.88                  | 2                        | 1.51                  | 2                        | 1.80                  | 2                        |
| 13520431  | 1.60                  | 2                        | 1.43                  | 1                        | 1.32                  | 1                        | 1.45                  | 1                        |
| 13520653  | 4.63                  | 5                        | 4.61                  | 5                        | 3.99                  | 4                        | 4.41                  | 4                        |
| 13530001  | 6.40                  | 6                        | 6.71                  | 7                        | 7.48                  | 7                        | 6.86                  | 7                        |
| 13530056  | 3.20                  | 3                        | 2.94                  | 3                        | 2.61                  | 3                        | 2.92                  | 3                        |
| 13530183  | 2.25                  | 2                        | 2.39                  | 2                        | 2.70                  | 3                        | 2.45                  | 2                        |

| Sample ID | Copy Number           |                          |                       |                          |                       |                          |                       |                          |
|-----------|-----------------------|--------------------------|-----------------------|--------------------------|-----------------------|--------------------------|-----------------------|--------------------------|
|           | r = 1                 |                          | r = 2                 |                          | r = 3                 |                          | Average               |                          |
|           | Ratio<br>(target/ref) | Estimated<br>Copy Number |
| 13530192  | 3.06                  | 3                        | 3.58                  | 4                        | 2.85                  | 3                        | 3.16                  | 3                        |
| 13530282  | 0.40                  | 0                        | 0.39                  | 0                        | 0.41                  | 0                        | 0.40                  | 0                        |
| 13530300  | 0.95                  | 1                        | 1.11                  | 1                        | 1.37                  | 1                        | 1.14                  | 1                        |
| 13530409  | 0.86                  | 1                        | 0.77                  | 1                        | 0.84                  | 1                        | 0.82                  | 1                        |
| 13530419  | 1.03                  | 1                        | 1.21                  | 1                        | 1.08                  | 1                        | 1.10                  | 1                        |
| 13530435  | 1.17                  | 1                        | 1.35                  | 1                        | 1.40                  | 1                        | 1.31                  | 1                        |
| 13530445  | 0.53                  | 1                        | 0.56                  | 1                        | 0.60                  | 1                        | 0.56                  | 1                        |
| 13530579  | 3.11                  | 3                        | 3.29                  | 3                        | 3.24                  | 3                        | 3.21                  | 3                        |
| 13530587  | 1.58                  | 2                        | 1.37                  | 1                        | 1.36                  | 1                        | 1.44                  | 1                        |
| 13540152  | 3.31                  | 3                        | 2.79                  | 3                        | 3.44                  | 3                        | 3.18                  | 3                        |
| 13570233  | 2.48                  | 2                        | 2.40                  | 2                        | 2.34                  | 2                        | 2.41                  | 2                        |
| 13580016  | 4.29                  | 4                        | 4.69                  | 5                        | 4.73                  | 5                        | 4.57                  | 5                        |
| 13580048  | 0.16                  | 0                        | 0.19                  | 0                        | 0.18                  | 0                        | 0.18                  | 0                        |
| 13580121  | 1.17                  | 1                        | 1.47                  | 1                        | 1.17                  | 1                        | 1.27                  | 1                        |
| 13580161  | 3.96                  | 4                        | 3.61                  | 4                        | 3.53                  | 4                        | 3.70                  | 4                        |
| 13580176  | 0.70                  | 1                        | 0.74                  | 1                        | 0.82                  | 1                        | 0.75                  | 1                        |
| 13580205  | 1.28                  | 1                        | 1.25                  | 1                        | 1.26                  | 1                        | 1.26                  | 1                        |
| 13580214  | 1.11                  | 1                        | 1.13                  | 1                        | 1.27                  | 1                        | 1.17                  | 1                        |
| 13590006  | 3.28                  | 3                        | 3.93                  | 4                        | 3.53                  | 4                        | 3.58                  | 4                        |

| Sample ID | Copy Number           |                          |                       |                          |                       |                          |                       |                          |
|-----------|-----------------------|--------------------------|-----------------------|--------------------------|-----------------------|--------------------------|-----------------------|--------------------------|
|           | r = 1                 |                          | r = 2                 |                          | r = 3                 |                          | Average               |                          |
|           | Ratio<br>(target/ref) | Estimated<br>Copy Number |
| 13590008  | 1.74                  | 2                        | 1.80                  | 2                        | 2.26                  | 2                        | 1.93                  | 2                        |
| 13590015  | 2.45                  | 2                        | 2.20                  | 2                        | 1.96                  | 2                        | 2.20                  | 2                        |
| 13590036  | 2.40                  | 2                        | 2.13                  | 2                        | 2.23                  | 2                        | 2.25                  | 2                        |
| 13590042  | 1.52                  | 2                        | 1.34                  | 1                        | 1.43                  | 1                        | 1.43                  | 1                        |
| 13590043  | 2.51                  | 3                        | 2.11                  | 2                        | 2.38                  | 2                        | 2.33                  | 2                        |
| 13590072  | 1.21                  | 1                        | 1.22                  | 1                        | 1.22                  | 1                        | 1.22                  | 1                        |
| 13590081  | 1.23                  | 1                        | 1.19                  | 1                        | 1.29                  | 1                        | 1.24                  | 1                        |
| 13590089  | 2.53                  | 3                        | 3.02                  | 3                        | 2.48                  | 2                        | 2.68                  | 3                        |
| 13590091  | 1.64                  | 2                        | 1.54                  | 2                        | 1.40                  | 1                        | 1.53                  | 2                        |
| 13590093  | 1.80                  | 2                        | 1.77                  | 2                        | 1.99                  | 2                        | 1.85                  | 2                        |
| 13590095  | 1.80                  | 2                        | 1.71                  | 2                        | 1.37                  | 1                        | 1.63                  | 2                        |
| 13590098  | 2.11                  | 2                        | 2.05                  | 2                        | 2.28                  | 2                        | 2.15                  | 2                        |
| 13590108  | 1.86                  | 2                        | 1.82                  | 2                        | 1.56                  | 2                        | 1.75                  | 2                        |
| 13590131  | 1.94                  | 2                        | 1.87                  | 2                        | 1.90                  | 2                        | 1.90                  | 2                        |
| 13590141  | 1.82                  | 2                        | 1.73                  | 2                        | 1.34                  | 1                        | 1.63                  | 2                        |
| 13590143  | 2.33                  | 2                        | 2.39                  | 2                        | 2.14                  | 2                        | 2.29                  | 2                        |
| 13590158  | 1.21                  | 1                        | 1.18                  | 1                        | 1.30                  | 1                        | 1.23                  | 1                        |
| 13590169  | 2.58                  | 3                        | 2.48                  | 2                        | 2.78                  | 3                        | 2.62                  | 3                        |
| 13590170  | 1.62                  | 2                        | 1.54                  | 2                        | 1.30                  | 1                        | 1.49                  | 1                        |

| Sample ID | Copy Number           |                          |                       |                          |                       |                          |                       |                          |
|-----------|-----------------------|--------------------------|-----------------------|--------------------------|-----------------------|--------------------------|-----------------------|--------------------------|
|           | r = 1                 |                          | r = 2                 |                          | r = 3                 |                          | Average               |                          |
|           | Ratio<br>(target/ref) | Estimated<br>Copy Number |
| 13590190  | 1.16                  | 1                        | 1.27                  | 1                        | 1.27                  | 1                        | 1.23                  | 1                        |
| 13590197  | 9.51                  | 10                       | 10.77                 | 11                       | 9.92                  | 10                       | 10.07                 | 10                       |
| 13590198  | 3.84                  | 4                        | 3.53                  | 4                        | 4.00                  | 4                        | 3.79                  | 4                        |
| 13590199  | 1.17                  | 1                        | 1.35                  | 1                        | 1.09                  | 1                        | 1.20                  | 1                        |
| 13590219  | 1.02                  | 1                        | 1.11                  | 1                        | 1.20                  | 1                        | 1.11                  | 1                        |
| 13590224  | 2.08                  | 2                        | 2.28                  | 2                        | 2.33                  | 2                        | 2.23                  | 2                        |
| 13590227  | 2.05                  | 2                        | 2.00                  | 2                        | 2.23                  | 2                        | 2.09                  | 2                        |
| 13590240  | 2.29                  | 2                        | 2.55                  | 3                        | 2.35                  | 2                        | 2.40                  | 2                        |
| 13590254  | 5.89                  | 6                        | 1.97                  | 2                        | 6.25                  | 6                        | 4.71                  | 5                        |
| 13590292  | 2.06                  | 2                        | 2.19                  | 2                        | 2.21                  | 2                        | 2.15                  | 2                        |
| 13590293  | 2.54                  | 3                        | 2.34                  | 2                        | 2.38                  | 2                        | 2.42                  | 2                        |
| 13590296  | 2.31                  | 2                        | 2.07                  | 2                        | 2.06                  | 2                        | 2.15                  | 2                        |
| 13590297  | 1.31                  | 1                        | 1.14                  | 1                        | 1.20                  | 1                        | 1.22                  | 1                        |
| 13590298  | 1.34                  | 1                        | 1.33                  | 1                        | 1.43                  | 1                        | 1.37                  | 1                        |
| 13590299  | 1.05                  | 1                        | 1.16                  | 1                        | 1.07                  | 1                        | 1.09                  | 1                        |
| 13590300  | 1.71                  | 2                        | 1.57                  | 2                        | 1.75                  | 2                        | 1.68                  | 2                        |
| 13590302  | 4.02                  | 4                        | 4.11                  | 4                        | 4.30                  | 4                        | 4.14                  | 4                        |
| 13590303  | 1.16                  | 1                        | 1.04                  | 1                        | 1.13                  | 1                        | 1.11                  | 1                        |
| 13590304  | 1.39                  | 1                        | 1.54                  | 2                        | 1.29                  | 1                        | 1.41                  | 1                        |

| Sample ID | Copy Number           |                          |                       |                          |                       |                          |                       |                          |
|-----------|-----------------------|--------------------------|-----------------------|--------------------------|-----------------------|--------------------------|-----------------------|--------------------------|
|           | r = 1                 |                          | r = 2                 |                          | r = 3                 |                          | Average               |                          |
|           | Ratio<br>(target/ref) | Estimated<br>Copy Number |
| 13590306  | 5.71                  | 6                        | 6.21                  | 6                        | 5.33                  | 5                        | 5.75                  | 6                        |
| 13590308  | 1.31                  | 1                        | 1.24                  | 1                        | 1.43                  | 1                        | 1.33                  | 1                        |
| 13590309  | 0.97                  | 1                        | 0.92                  | 1                        | 0.82                  | 1                        | 0.90                  | 1                        |
| 13590310  | 1.14                  | 1                        | 1.15                  | 1                        | 1.23                  | 1                        | 1.17                  | 1                        |
| 13590311  | 2.08                  | 2                        | 2.26                  | 2                        | 2.21                  | 2                        | 2.18                  | 2                        |
| 13590312  | 1.24                  | 1                        | 1.31                  | 1                        | 1.29                  | 1                        | 1.28                  | 1                        |
| 13590313  | 2.21                  | 2                        | 2.33                  | 2                        | 1.85                  | 2                        | 2.13                  | 2                        |
| 13590314  | 0.73                  | 1                        | 0.85                  | 1                        | 0.78                  | 1                        | 0.79                  | 1                        |
| 13590316  | 1.90                  | 2                        | 1.47                  | 1                        | 1.54                  | 2                        | 1.63                  | 2                        |
| 13590317  | 2.12                  | 2                        | 1.99                  | 2                        | 1.94                  | 2                        | 2.02                  | 2                        |
| 13590319  | 0.89                  | 1                        | 0.97                  | 1                        | 0.97                  | 1                        | 0.94                  | 1                        |
| 13590320  | 1.65                  | 2                        | 1.65                  | 2                        | 1.69                  | 2                        | 1.66                  | 2                        |
| 13590321  | 8.73                  | 9                        | 9.04                  | 9                        | 7.87                  | 8                        | 8.55                  | 9                        |
| 13590322  | 1.18                  | 1                        | 1.40                  | 1                        | 1.26                  | 1                        | 1.28                  | 1                        |
| 13590325  | 0.52                  | 1                        | 0.51                  | 1                        | 0.55                  | 1                        | 0.52                  | 1                        |
| 13590326  | 1.80                  | 2                        | 1.51                  | 2                        | 1.57                  | 2                        | 1.62                  | 2                        |
| 13590327  | 1.37                  | 1                        | 1.32                  | 1                        | 1.26                  | 1                        | 1.32                  | 1                        |
| 13590328  | 1.24                  | 1                        | 1.44                  | 1                        | 1.45                  | 1                        | 1.37                  | 1                        |
| 13590334  | 1.69                  | 2                        | 1.67                  | 2                        | 1.54                  | 2                        | 1.63                  | 2                        |

| Sample ID | Copy Number           |                          |                       |                          |                       |                          |                       |                          |
|-----------|-----------------------|--------------------------|-----------------------|--------------------------|-----------------------|--------------------------|-----------------------|--------------------------|
|           | r = 1                 |                          | r = 2                 |                          | r = 3                 |                          | Average               |                          |
|           | Ratio<br>(target/ref) | Estimated<br>Copy Number |
| 13590335  | 1.27                  | 1                        | 1.37                  | 1                        | 1.37                  | 1                        | 1.34                  | 1                        |
| 13590337  | 1.17                  | 1                        | 1.11                  | 1                        | 1.30                  | 1                        | 1.19                  | 1                        |
| 13590338  | 1.13                  | 1                        | 1.28                  | 1                        | 1.25                  | 1                        | 1.22                  | 1                        |
| 13590342  | 2.81                  | 3                        | 2.27                  | 2                        | 2.91                  | 3                        | 2.67                  | 3                        |
| 13590343  | 2.08                  | 2                        | 2.27                  | 2                        | 2.20                  | 2                        | 2.18                  | 2                        |
| 13590345  | 1.53                  | 2                        | 1.70                  | 2                        | 1.70                  | 2                        | 1.64                  | 2                        |
| 13590358  | 2.13                  | 2                        | 2.07                  | 2                        | 1.95                  | 2                        | 2.05                  | 2                        |
| 13590390  | 2.17                  | 2                        | 2.00                  | 2                        | 2.01                  | 2                        | 2.06                  | 2                        |
| 13590392  | 1.01                  | 1                        | 1.06                  | 1                        | 1.23                  | 1                        | 1.10                  | 1                        |
| 13590396  | 8.44                  | 8                        | 7.67                  | 8                        | 9.30                  | 9                        | 8.47                  | 8                        |
| 13590429  | 1.30                  | 1                        | 1.44                  | 1                        | 1.48                  | 1                        | 1.41                  | 1                        |
| 13590443  | 3.96                  | 4                        | 3.83                  | 4                        | 3.35                  | 3                        | 3.71                  | 4                        |
| 13590444  | 4.14                  | 4                        | 4.90                  | 5                        | 4.74                  | 5                        | 4.59                  | 5                        |
| 13590445  | 3.41                  | 3                        | 3.62                  | 4                        | 3.60                  | 4                        | 3.54                  | 4                        |
| 13590446  | 6.98                  | 7                        | 6.29                  | 6                        | 5.25                  | 5                        | 6.17                  | 6                        |
| 13590448  | 3.53                  | 4                        | 3.27                  | 3                        | 2.99                  | 3                        | 3.27                  | 3                        |
| 13590449  | 1.50                  | 2                        | 1.69                  | 2                        | 1.25                  | 1                        | 1.48                  | 1                        |
| 13590470  | 6.61                  | 7                        | 6.22                  | 6                        | 6.27                  | 6                        | 6.37                  | 6                        |
| 13590498  | 2.09                  | 2                        | 1.15                  | 1                        | 1.21                  | 1                        | 1.48                  | 1                        |



| Sample ID | Copy Number           |                          |                       |                          |                       |                          |                       |                          |
|-----------|-----------------------|--------------------------|-----------------------|--------------------------|-----------------------|--------------------------|-----------------------|--------------------------|
|           | r = 1                 |                          | r = 2                 |                          | r = 3                 |                          | Average               |                          |
|           | Ratio<br>(target/ref) | Estimated<br>Copy Number |
| 13590503  | 0.61                  | 1                        | 0.59                  | 1                        | 0.66                  | 1                        | 0.62                  | 1                        |
| 13590504  | 1.99                  | 2                        | 1.68                  | 2                        | 1.82                  | 2                        | 1.83                  | 2                        |
| 13590506  | 2.79                  | 3                        | 2.25                  | 2                        | 2.47                  | 2                        | 2.50                  | 3                        |
| 13590507  | 1.54                  | 2                        | 1.56                  | 2                        | 1.64                  | 2                        | 1.58                  | 2                        |
| 13590510  | 1.07                  | 1                        | 1.01                  | 1                        | 0.85                  | 1                        | 0.98                  | 1                        |
| 13590536  | 2.54                  | 3                        | 2.46                  | 2                        | 2.17                  | 2                        | 2.39                  | 2                        |
| 13590538  | 2.80                  | 3                        | 2.86                  | 3                        | 3.22                  | 3                        | 2.96                  | 3                        |
| 13590558  | 2.29                  | 2                        | 2.03                  | 2                        | 1.97                  | 2                        | 2.10                  | 2                        |
| 13590559  | 2.41                  | 2                        | 1.95                  | 2                        | 2.11                  | 2                        | 2.16                  | 2                        |
| 13590560  | 2.34                  | 2                        | 2.57                  | 3                        | 2.49                  | 2                        | 2.47                  | 2                        |
| 13590563  | 7.91                  | 8                        | 5.65                  | 6                        | 6.07                  | 6                        | 6.54                  | 7                        |
| 13590591  | 4.67                  | 5                        | 4.90                  | 5                        | 2.58                  | 3                        | 4.05                  | 4                        |
| 13590597  | 1.43                  | 1                        | 1.50                  | 1                        | 1.51                  | 2                        | 1.48                  | 1                        |
| 13590610  | 4.33                  | 4                        | 4.27                  | 4                        | 4.02                  | 4                        | 4.21                  | 4                        |
| 13590615  | 3.19                  | 3                        | 3.78                  | 4                        | 4.57                  | 5                        | 3.85                  | 4                        |
| 13590678  | 1.27                  | 1                        | 1.50                  | 1                        | 1.54                  | 2                        | 1.44                  | 1                        |
| 13590680  | 1.47                  | 1                        | 1.61                  | 2                        | 1.63                  | 2                        | 1.57                  | 2                        |
| 13590683  | 0.85                  | 1                        | 0.78                  | 1                        | 0.73                  | 1                        | 0.79                  | 1                        |
| 13590685  | 1.44                  | 1                        | 1.62                  | 2                        | 1.39                  | 1                        | 1.48                  | 1                        |

| Sample ID | Copy Number           |                          |                       |                          |                       |                          |                       |                          |
|-----------|-----------------------|--------------------------|-----------------------|--------------------------|-----------------------|--------------------------|-----------------------|--------------------------|
|           | r = 1                 |                          | r = 2                 |                          | r = 3                 |                          | Average               |                          |
|           | Ratio<br>(target/ref) | Estimated<br>Copy Number |
| 13590686  | 4.13                  | 4                        | 4.47                  | 4                        | 4.50                  | 4                        | 4.36                  | 4                        |
| 13590687  | 1.18                  | 1                        | 1.49                  | 1                        | 1.24                  | 1                        | 1.30                  | 1                        |
| 13590698  | 2.28                  | 2                        | 2.11                  | 2                        | 1.92                  | 2                        | 2.10                  | 2                        |
| 13590702  | 0.55                  | 1                        | 0.42                  | 0                        | 0.56                  | 1                        | 0.51                  | 1                        |
| 13590704  | 1.68                  | 2                        | 1.56                  | 2                        | 1.24                  | 1                        | 1.49                  | 1                        |
| 13590706  | 1.17                  | 1                        | 1.12                  | 1                        | 1.11                  | 1                        | 1.13                  | 1                        |
| 13590708  | 1.26                  | 1                        | 1.46                  | 1                        | 1.54                  | 2                        | 1.42                  | 1                        |
| 13590714  | 1.96                  | 2                        | 1.88                  | 2                        | 1.92                  | 2                        | 1.92                  | 2                        |
| 13590744  | 1.59                  | 2                        | 1.46                  | 1                        | 1.42                  | 1                        | 1.49                  | 1                        |
| 13590748  | 1.19                  | 1                        | 0.90                  | 1                        | 1.02                  | 1                        | 1.04                  | 1                        |
| 13590752  | 3.02                  | 3                        | 3.12                  | 3                        | 2.79                  | 3                        | 2.97                  | 3                        |
| 13590754  | 2.23                  | 2                        | 2.15                  | 2                        | 2.19                  | 2                        | 2.19                  | 2                        |
| 13590760  | 1.33                  | 1                        | 1.04                  | 1                        | 1.15                  | 1                        | 1.17                  | 1                        |
| 13590761  | 3.01                  | 3                        | 3.10                  | 3                        | 3.57                  | 4                        | 3.22                  | 3                        |
| 13590764  | 1.29                  | 1                        | 0.99                  | 1                        | 1.15                  | 1                        | 1.14                  | 1                        |
| 13590765  | 0.75                  | 1                        | 0.80                  | 1                        | 0.83                  | 1                        | 0.79                  | 1                        |
| 13590766  | 2.15                  | 2                        | 2.81                  | 3                        | 2.85                  | 3                        | 2.60                  | 3                        |
| 13590798  | 1.30                  | 1                        | 1.16                  | 1                        | 1.02                  | 1                        | 1.16                  | 1                        |
| 13590801  | 3.25                  | 3                        | 1.82                  | 2                        | 1.62                  | 2                        | 2.23                  | 2                        |

| Sample ID | Copy Number           |                          |                       |                          |                       |                          |                       |                          |
|-----------|-----------------------|--------------------------|-----------------------|--------------------------|-----------------------|--------------------------|-----------------------|--------------------------|
|           | r = 1                 |                          | r = 2                 |                          | r = 3                 |                          | Average               |                          |
|           | Ratio<br>(target/ref) | Estimated<br>Copy Number |
| 13590805  | 2.98                  | 3                        | 3.71                  | 4                        | 2.62                  | 3                        | 3.10                  | 3                        |
| 13590810  | 2.57                  | 3                        | 2.51                  | 3                        | 2.32                  | 2                        | 2.47                  | 2                        |
| 13590811  | 1.99                  | 2                        | 1.96                  | 2                        | 1.97                  | 2                        | 1.97                  | 2                        |
| 13590820  | 1.18                  | 1                        | 1.10                  | 1                        | 1.24                  | 1                        | 1.17                  | 1                        |
| 13590822  | 5.32                  | 5                        | 5.42                  | 5                        | 5.43                  | 5                        | 5.39                  | 5                        |
| 13590823  | 2.58                  | 3                        | 2.15                  | 2                        | 2.32                  | 2                        | 2.35                  | 2                        |
| 13590827  | 0.49                  | 0                        | 0.45                  | 0                        | 0.48                  | 0                        | 0.47                  | 0                        |
| 13600003  | 0.82                  | 1                        | 0.79                  | 1                        | 0.85                  | 1                        | 0.82                  | 1                        |
| 13600007  | 1.48                  | 1                        | 1.55                  | 2                        | 1.47                  | 1                        | 1.50                  | 1                        |
| 13600013  | 2.23                  | 2                        | 2.15                  | 2                        | 2.38                  | 2                        | 2.25                  | 2                        |
| 13600014  | 2.94                  | 3                        | 2.94                  | 3                        | 3.02                  | 3                        | 2.97                  | 3                        |
| 13600015  | 2.75                  | 3                        | 2.54                  | 3                        | 2.77                  | 3                        | 2.68                  | 3                        |
| 13600019  | 1.27                  | 1                        | 1.16                  | 1                        | 1.26                  | 1                        | 1.23                  | 1                        |
| 13600021  | 5.08                  | 5                        | 5.12                  | 5                        | 5.08                  | 5                        | 5.09                  | 5                        |
| 13600023  | 2.07                  | 2                        | 1.97                  | 2                        | 2.00                  | 2                        | 2.01                  | 2                        |
| 13600024  | 1.37                  | 1                        | 1.35                  | 1                        | 1.23                  | 1                        | 1.32                  | 1                        |
| 13600032  | 1.93                  | 2                        | 2.19                  | 2                        | 2.13                  | 2                        | 2.08                  | 2                        |
| 13600034  | 1.22                  | 1                        | 1.27                  | 1                        | 1.28                  | 1                        | 1.26                  | 1                        |
| 13600035  | 10.65                 | 11                       | 10.32                 | 10                       | 10.73                 | 11                       | 10.57                 | 11                       |

| Sample ID | Copy Number           |                          |                       |                          |                       |                          |                       |                          |
|-----------|-----------------------|--------------------------|-----------------------|--------------------------|-----------------------|--------------------------|-----------------------|--------------------------|
|           | r = 1                 |                          | r = 2                 |                          | r = 3                 |                          | Average               |                          |
|           | Ratio<br>(target/ref) | Estimated<br>Copy Number |
| 13600036  | 1.21                  | 1                        | 1.10                  | 1                        | 1.25                  | 1                        | 1.19                  | 1                        |
| 13600038  | 1.21                  | 1                        | 1.17                  | 1                        | 1.15                  | 1                        | 1.18                  | 1                        |
| 13600039  | 2.85                  | 3                        | 2.64                  | 3                        | 2.58                  | 3                        | 2.69                  | 3                        |
| 13600040  | 2.33                  | 2                        | 1.87                  | 2                        | 1.98                  | 2                        | 2.06                  | 2                        |
| 13600044  | 3.60                  | 4                        | 4.66                  | 5                        | 3.83                  | 4                        | 4.03                  | 4                        |
| 13600045  | 1.13                  | 1                        | 1.35                  | 1                        | 1.30                  | 1                        | 1.26                  | 1                        |
| 13600046  | 1.28                  | 1                        | 1.23                  | 1                        | 1.34                  | 1                        | 1.29                  | 1                        |
| 13600048  | 1.82                  | 2                        | 2.36                  | 2                        | 2.00                  | 2                        | 2.06                  | 2                        |
| 13600049  | 0.04                  | 0                        | 0.04                  | 0                        | 0.04                  | 0                        | 0.04                  | 0                        |
| 13600050  | 1.17                  | 1                        | 1.28                  | 1                        | 1.12                  | 1                        | 1.19                  | 1                        |
| 13600051  | 2.03                  | 2                        | 2.20                  | 2                        | 1.92                  | 2                        | 2.05                  | 2                        |
| 13600052  | 2.22                  | 2                        | 2.42                  | 2                        | 2.25                  | 2                        | 2.30                  | 2                        |
| 13600053  | 0.99                  | 1                        | 1.23                  | 1                        | 1.32                  | 1                        | 1.18                  | 1                        |
| 13600057  | 1.46                  | 1                        | 1.23                  | 1                        | 1.25                  | 1                        | 1.31                  | 1                        |
| 13600058  | 10.55                 | 11                       | 10.85                 | 11                       | 11.01                 | 11                       | 10.80                 | 11                       |
| 13600062  | 0.71                  | 1                        | 0.86                  | 1                        | 0.73                  | 1                        | 0.77                  | 1                        |
| 13600069  | 2.36                  | 2                        | 1.75                  | 2                        | 1.64                  | 2                        | 1.92                  | 2                        |
| 13600076  | 0.96                  | 1                        | 0.98                  | 1                        | 0.99                  | 1                        | 0.98                  | 1                        |
| 13600077  | 2.33                  | 2                        | 2.28                  | 2                        | 2.24                  | 2                        | 2.28                  | 2                        |

| Sample ID | Copy Number           |                          |                       |                          |                       |                          |                       |                          |
|-----------|-----------------------|--------------------------|-----------------------|--------------------------|-----------------------|--------------------------|-----------------------|--------------------------|
|           | r = 1                 |                          | r = 2                 |                          | r = 3                 |                          | Average               |                          |
|           | Ratio<br>(target/ref) | Estimated<br>Copy Number |
| 13600078  | 1.28                  | 1                        | 1.31                  | 1                        | 1.21                  | 1                        | 1.27                  | 1                        |
| 13600080  | 4.95                  | 5                        | 5.03                  | 5                        | 5.11                  | 5                        | 5.03                  | 5                        |
| 13600081  | 1.07                  | 1                        | 1.00                  | 1                        | 0.95                  | 1                        | 1.00                  | 1                        |
| 13600084  | 1.96                  | 2                        | 2.30                  | 2                        | 1.92                  | 2                        | 2.06                  | 2                        |
| 13600086  | 2.89                  | 3                        | 3.62                  | 4                        | 3.31                  | 3                        | 3.27                  | 3                        |
| 13600088  | 1.48                  | 1                        | 1.18                  | 1                        | 1.47                  | 1                        | 1.38                  | 1                        |
| 13600089  | 0.95                  | 1                        | 1.12                  | 1                        | 1.21                  | 1                        | 1.09                  | 1                        |
| 13600090  | 1.17                  | 1                        | 1.13                  | 1                        | 1.19                  | 1                        | 1.16                  | 1                        |
| 13600092  | 2.23                  | 2                        | 2.31                  | 2                        | 2.85                  | 3                        | 2.46                  | 2                        |
| 13600094  | 2.41                  | 2                        | 2.46                  | 2                        | 2.07                  | 2                        | 2.32                  | 2                        |
| 13600095  | 2.48                  | 2                        | 2.45                  | 2                        | 2.17                  | 2                        | 2.37                  | 2                        |
| 13600096  | 2.32                  | 2                        | 2.47                  | 2                        | 2.67                  | 3                        | 2.49                  | 2                        |
| 13600099  | 2.00                  | 2                        | 1.98                  | 2                        | 2.24                  | 2                        | 2.07                  | 2                        |
| 13600103  | 1.14                  | 1                        | 1.36                  | 1                        | 1.05                  | 1                        | 1.18                  | 1                        |
| 13600115  | 1.40                  | 1                        | 1.55                  | 2                        | 1.35                  | 1                        | 1.44                  | 1                        |
| 13600125  | 1.37                  | 1                        | 1.18                  | 1                        | 1.23                  | 1                        | 1.26                  | 1                        |
| 13600130  | 1.33                  | 1                        | 1.49                  | 1                        | 1.39                  | 1                        | 1.40                  | 1                        |
| 13600137  | 5.89                  | 6                        | 4.98                  | 5                        | 5.84                  | 6                        | 5.57                  | 6                        |
| 13600156  | 1.84                  | 2                        | 1.99                  | 2                        | 2.10                  | 2                        | 1.98                  | 2                        |

| Sample ID | Copy Number           |                          |                       |                          |                       |                          |                       |                          |
|-----------|-----------------------|--------------------------|-----------------------|--------------------------|-----------------------|--------------------------|-----------------------|--------------------------|
|           | r = 1                 |                          | r = 2                 |                          | r = 3                 |                          | Average               |                          |
|           | Ratio<br>(target/ref) | Estimated<br>Copy Number |
| 13600177  | 2.22                  | 2                        | 2.04                  | 2                        | 1.94                  | 2                        | 2.07                  | 2                        |
| 13600184  | 3.28                  | 3                        | 3.02                  | 3                        | 2.78                  | 3                        | 3.03                  | 3                        |
| 13600205  | 0.27                  | 0                        | 0.33                  | 0                        | 0.28                  | 0                        | 0.29                  | 0                        |
| 13600214  | 1.46                  | 1                        | 1.06                  | 1                        | 1.30                  | 1                        | 1.27                  | 1                        |
| 13600230  | 1.83                  | 2                        | 1.43                  | 1                        | 1.61                  | 2                        | 1.62                  | 2                        |
| 13600235  | 1.40                  | 1                        | 1.31                  | 1                        | 1.39                  | 1                        | 1.36                  | 1                        |
| 13600297  | 0.89                  | 1                        | 0.89                  | 1                        | 0.84                  | 1                        | 0.87                  | 1                        |
| 13600304  | 1.03                  | 1                        | 0.90                  | 1                        | 1.05                  | 1                        | 0.99                  | 1                        |
| 13600307  | 1.85                  | 2                        | 1.81                  | 2                        | 1.77                  | 2                        | 1.81                  | 2                        |
| 13600316  | 1.85                  | 2                        | 1.83                  | 2                        | 1.64                  | 2                        | 1.78                  | 2                        |
| 13600325  | 1.86                  | 2                        | 2.30                  | 2                        | 2.17                  | 2                        | 2.11                  | 2                        |
| 13600364  | 1.53                  | 2                        | 1.80                  | 2                        | 2.47                  | 2                        | 1.93                  | 2                        |
| 13600369  | 1.04                  | 1                        | 1.01                  | 1                        | 1.04                  | 1                        | 1.03                  | 1                        |
| 13600372  | 1.07                  | 1                        | 1.07                  | 1                        | 0.85                  | 1                        | 1.00                  | 1                        |
| 13600382  | 1.58                  | 2                        | 1.64                  | 2                        | 1.91                  | 2                        | 1.71                  | 2                        |
| 13600383  | 1.12                  | 1                        | 1.26                  | 1                        | 0.96                  | 1                        | 1.11                  | 1                        |
| 13600389  | 0.99                  | 1                        | 1.08                  | 1                        | 1.08                  | 1                        | 1.05                  | 1                        |
| 13600391  | 0.81                  | 1                        | 1.02                  | 1                        | 1.24                  | 1                        | 1.02                  | 1                        |
| 13600393  | 0.77                  | 1                        | 1.14                  | 1                        | 1.09                  | 1                        | 1.00                  | 1                        |

| Sample ID | Copy Number           |                          |                       |                          |                       |                          |                       |                          |
|-----------|-----------------------|--------------------------|-----------------------|--------------------------|-----------------------|--------------------------|-----------------------|--------------------------|
|           | r = 1                 |                          | r = 2                 |                          | r = 3                 |                          | Average               |                          |
|           | Ratio<br>(target/ref) | Estimated<br>Copy Number |
| 13600395  | 1.19                  | 1                        | 1.33                  | 1                        | 1.06                  | 1                        | 1.19                  | 1                        |
| 13600407  | 2.01                  | 2                        | 2.37                  | 2                        | 2.24                  | 2                        | 2.21                  | 2                        |
| 13600408  | 1.82                  | 2                        | 2.01                  | 2                        | 2.11                  | 2                        | 1.98                  | 2                        |
| 13610011  | 0.76                  | 1                        | 1.08                  | 1                        | 1.05                  | 1                        | 0.96                  | 1                        |
| 13610017  | 1.89                  | 2                        | 1.78                  | 2                        | 1.78                  | 2                        | 1.82                  | 2                        |
| 13610030  | 2.31                  | 2                        | 2.22                  | 2                        | 1.79                  | 2                        | 2.11                  | 2                        |
| 13610061  | 1.70                  | 2                        | 1.60                  | 2                        | 1.50                  | 2                        | 1.60                  | 2                        |
| 13610082  | 0.65                  | 1                        | 0.63                  | 1                        | 0.68                  | 1                        | 0.65                  | 1                        |
| 13610086  | 5.71                  | 6                        | 5.71                  | 6                        | 5.43                  | 5                        | 5.62                  | 6                        |
| 13610161  | 0.99                  | 1                        | 0.99                  | 1                        | 0.91                  | 1                        | 0.96                  | 1                        |
| 13610189  | 1.04                  | 1                        | 0.92                  | 1                        | 0.80                  | 1                        | 0.92                  | 1                        |
| 13610191  | 1.42                  | 1                        | 1.27                  | 1                        | 1.51                  | 2                        | 1.40                  | 1                        |
| 13610193  | 1.16                  | 1                        | 0.98                  | 1                        | 1.20                  | 1                        | 1.12                  | 1                        |
| 13610202  | 0.95                  | 1                        | 1.07                  | 1                        | 0.89                  | 1                        | 0.97                  | 1                        |
| 13610207  | 1.60                  | 2                        | 1.48                  | 1                        | 1.96                  | 2                        | 1.68                  | 2                        |
| 13610219  | 1.10                  | 1                        | 0.90                  | 1                        | 0.98                  | 1                        | 1.00                  | 1                        |
| 13610232  | 3.53                  | 4                        | 3.73                  | 4                        | 4.18                  | 4                        | 3.81                  | 4                        |
| 13610235  | 0.86                  | 1                        | 0.97                  | 1                        | 0.93                  | 1                        | 0.92                  | 1                        |
| 13610244  | 0.95                  | 1                        | 1.04                  | 1                        | 1.38                  | 1                        | 1.12                  | 1                        |

| Sample ID | Copy Number           |                          |                       |                          |                       |                          |                       |                          |
|-----------|-----------------------|--------------------------|-----------------------|--------------------------|-----------------------|--------------------------|-----------------------|--------------------------|
|           | r = 1                 |                          | r = 2                 |                          | r = 3                 |                          | Average               |                          |
|           | Ratio<br>(target/ref) | Estimated<br>Copy Number |
| 13610256  | 0.87                  | 1                        | 1.05                  | 1                        | 0.89                  | 1                        | 0.93                  | 1                        |
| 13610260  | 0.95                  | 1                        | 1.06                  | 1                        | 1.11                  | 1                        | 1.04                  | 1                        |
| 13610264  | 1.09                  | 1                        | 1.38                  | 1                        | 1.18                  | 1                        | 1.22                  | 1                        |
| 13610270  | 1.25                  | 1                        | 1.19                  | 1                        | 1.03                  | 1                        | 1.16                  | 1                        |
| 13610271  | 3.47                  | 3                        | 3.09                  | 3                        | 3.18                  | 3                        | 3.25                  | 3                        |
| 13610277  | 1.51                  | 2                        | 1.67                  | 2                        | 1.47                  | 1                        | 1.55                  | 2                        |
| 13610282  | 1.02                  | 1                        | 1.17                  | 1                        | 1.19                  | 1                        | 1.13                  | 1                        |
| 13610286  | 2.32                  | 2                        | 2.50                  | 3                        | 2.33                  | 2                        | 2.39                  | 2                        |
| 13610293  | 0.35                  | 0                        | 0.34                  | 0                        | 0.47                  | 0                        | 0.39                  | 0                        |
| 13610298  | 0.52                  | 1                        | 0.56                  | 1                        | 0.48                  | 0                        | 0.52                  | 1                        |
| 13610323  | 1.01                  | 1                        | 1.30                  | 1                        | 1.02                  | 1                        | 1.11                  | 1                        |
| 13610325  | 2.66                  | 3                        | 2.11                  | 2                        | 2.01                  | 2                        | 2.26                  | 2                        |
| 13610326  | 2.16                  | 2                        | 2.21                  | 2                        | 2.18                  | 2                        | 2.18                  | 2                        |
| 13610331  | 1.22                  | 1                        | 1.11                  | 1                        | 1.10                  | 1                        | 1.14                  | 1                        |
| 13610340  | 4.88                  | 5                        | 5.25                  | 5                        | 4.49                  | 4                        | 4.87                  | 5                        |
| 13610345  | 1.08                  | 1                        | 1.24                  | 1                        | 1.22                  | 1                        | 1.18                  | 1                        |
| 13610378  | 0.49                  | 0                        | 0.47                  | 0                        | 0.41                  | 0                        | 0.46                  | 0                        |
| 13610380  | 4.46                  | 4                        | 4.18                  | 4                        | 4.25                  | 4                        | 4.30                  | 4                        |
| 13610392  | 0.23                  | 0                        | 0.25                  | 0                        | 0.25                  | 0                        | 0.24                  | 0                        |



| Sample ID | Copy Number           |                          |                       |                          |                       |                          |                       |                          |
|-----------|-----------------------|--------------------------|-----------------------|--------------------------|-----------------------|--------------------------|-----------------------|--------------------------|
|           | r = 1                 |                          | r = 2                 |                          | r = 3                 |                          | Average               |                          |
|           | Ratio<br>(target/ref) | Estimated<br>Copy Number |
| 13610393  | 0.13                  | 0                        | 0.12                  | 0                        | 0.11                  | 0                        | 0.12                  | 0                        |
| 13610403  | 1.06                  | 1                        | 1.07                  | 1                        | 0.87                  | 1                        | 1.00                  | 1                        |
| 13610410  | 0.27                  | 0                        | 0.20                  | 0                        | 0.21                  | 0                        | 0.23                  | 0                        |
| 13610424  | 0.10                  | 0                        | 0.08                  | 0                        | 0.07                  | 0                        | 0.08                  | 0                        |
| 13610433  | 1.81                  | 2                        | 1.89                  | 2                        | 1.53                  | 2                        | 1.74                  | 2                        |
| 13610439  | 1.58                  | 2                        | 1.57                  | 2                        | 1.84                  | 2                        | 1.66                  | 2                        |
| 13610446  | 1.88                  | 2                        | 1.78                  | 2                        | 1.98                  | 2                        | 1.88                  | 2                        |
| 13610461  | 1.08                  | 1                        | 0.96                  | 1                        | 0.89                  | 1                        | 0.98                  | 1                        |
| 13610476  | 1.08                  | 1                        | 0.97                  | 1                        | 0.94                  | 1                        | 1.00                  | 1                        |
| 13610518  | 1.75                  | 2                        | 1.87                  | 2                        | 1.85                  | 2                        | 1.82                  | 2                        |
| 13610529  | 1.02                  | 1                        | 0.96                  | 1                        | 1.04                  | 1                        | 1.01                  | 1                        |
| 13610537  | 0.98                  | 1                        | 1.09                  | 1                        | 1.06                  | 1                        | 1.04                  | 1                        |
| 13610540  | 1.12                  | 1                        | 1.05                  | 1                        | 1.24                  | 1                        | 1.14                  | 1                        |
| 13610563  | 1.06                  | 1                        | 1.21                  | 1                        | 1.08                  | 1                        | 1.12                  | 1                        |
| 13610745  | 1.78                  | 2                        | 1.87                  | 2                        | 2.57                  | 3                        | 2.08                  | 2                        |
| 13610747  | 2.72                  | 3                        | 2.82                  | 3                        | 3.33                  | 3                        | 2.96                  | 3                        |
| 13610759  | 2.08                  | 2                        | 1.73                  | 2                        | 1.90                  | 2                        | 1.90                  | 2                        |
| 13610785  | 1.07                  | 1                        | 1.06                  | 1                        | 1.08                  | 1                        | 1.07                  | 1                        |
| 13610793  | 1.06                  | 1                        | 0.97                  | 1                        | 0.99                  | 1                        | 1.01                  | 1                        |

| Sample ID | Copy Number           |                          |                       |                          |                       |                          |                       |                          |
|-----------|-----------------------|--------------------------|-----------------------|--------------------------|-----------------------|--------------------------|-----------------------|--------------------------|
|           | r = 1                 |                          | r = 2                 |                          | r = 3                 |                          | Average               |                          |
|           | Ratio<br>(target/ref) | Estimated<br>Copy Number |
| 13610794  | 3.54                  | 4                        | 3.39                  | 3                        | 3.87                  | 4                        | 3.60                  | 4                        |
| 13610796  | 1.73                  | 2                        | 1.65                  | 2                        | 1.66                  | 2                        | 1.68                  | 2                        |
| 13620023  | 1.04                  | 1                        | 1.19                  | 1                        | 1.21                  | 1                        | 1.15                  | 1                        |
| 13620025  | 1.06                  | 1                        | 0.96                  | 1                        | 1.17                  | 1                        | 1.06                  | 1                        |
| 13620028  | 1.07                  | 1                        | 1.00                  | 1                        | 1.13                  | 1                        | 1.07                  | 1                        |
| 13620040  | 2.03                  | 2                        | 1.88                  | 2                        | 1.93                  | 2                        | 1.95                  | 2                        |
| 13620049  | 0.99                  | 1                        | 0.94                  | 1                        | 0.94                  | 1                        | 0.96                  | 1                        |
| 13620051  | 3.42                  | 3                        | 4.09                  | 4                        | 3.44                  | 3                        | 3.65                  | 4                        |
| 13620059  | 1.81                  | 2                        | 1.84                  | 2                        | 1.99                  | 2                        | 1.88                  | 2                        |
| 13620064  | 0.87                  | 1                        | 0.96                  | 1                        | 0.92                  | 1                        | 0.92                  | 1                        |
| 13620068  | 0.03                  | 0                        | 0.02                  | 0                        | 0.02                  | 0                        | 0.02                  | 0                        |
| 13620069  | 3.08                  | 3                        | 2.85                  | 3                        | 3.16                  | 3                        | 3.03                  | 3                        |
| 13620074  | 0.97                  | 1                        | 1.03                  | 1                        | 1.12                  | 1                        | 1.04                  | 1                        |
| 13620078  | 4.64                  | 5                        | 4.04                  | 4                        | 4.53                  | 5                        | 4.40                  | 4                        |
| 13620081  | 5.10                  | 5                        | 3.58                  | 4                        | 3.95                  | 4                        | 4.21                  | 4                        |
| 13620083  | 1.03                  | 1                        | 1.07                  | 1                        | 1.13                  | 1                        | 1.08                  | 1                        |
| 13620084  | 1.85                  | 2                        | 1.99                  | 2                        | 1.98                  | 2                        | 1.94                  | 2                        |
| 13620085  | 1.14                  | 1                        | 1.04                  | 1                        | 0.90                  | 1                        | 1.03                  | 1                        |
| 13620087  | 4.47                  | 4                        | 4.97                  | 5                        | 4.08                  | 4                        | 4.51                  | 5                        |

| Sample ID | Copy Number           |                          |                       |                          |                       |                          |                       |                          |
|-----------|-----------------------|--------------------------|-----------------------|--------------------------|-----------------------|--------------------------|-----------------------|--------------------------|
|           | r = 1                 |                          | r = 2                 |                          | r = 3                 |                          | Average               |                          |
|           | Ratio<br>(target/ref) | Estimated<br>Copy Number |
| 13620088  | 4.88                  | 5                        | 4.62                  | 5                        | 4.44                  | 4                        | 4.65                  | 5                        |
| 13620090  | 5.34                  | 5                        | 4.15                  | 4                        | 4.33                  | 4                        | 4.61                  | 5                        |
| 13620091  | 2.68                  | 3                        | 2.17                  | 2                        | 2.40                  | 2                        | 2.42                  | 2                        |
| 13620092  | 1.78                  | 2                        | 1.73                  | 2                        | 1.72                  | 2                        | 1.74                  | 2                        |
| 13620093  | 1.48                  | 1                        | 1.73                  | 2                        | 1.85                  | 2                        | 1.69                  | 2                        |
| 13620094  | 2.12                  | 2                        | 2.17                  | 2                        | 2.18                  | 2                        | 2.16                  | 2                        |
| 13620096  | 1.89                  | 2                        | 1.95                  | 2                        | 1.79                  | 2                        | 1.87                  | 2                        |
| 13620097  | 1.08                  | 1                        | 1.04                  | 1                        | 1.20                  | 1                        | 1.11                  | 1                        |
| 13620098  | 2.94                  | 3                        | 3.36                  | 3                        | 3.07                  | 3                        | 3.12                  | 3                        |
| 13620099  | 1.88                  | 2                        | 1.98                  | 2                        | 2.12                  | 2                        | 2.00                  | 2                        |
| 13620100  | 2.08                  | 2                        | 1.88                  | 2                        | 1.87                  | 2                        | 1.95                  | 2                        |
| 13620101  | 1.93                  | 2                        | 1.93                  | 2                        | 1.95                  | 2                        | 1.94                  | 2                        |
| 13620107  | 1.87                  | 2                        | 1.89                  | 2                        | 2.10                  | 2                        | 1.95                  | 2                        |
| 13620109  | 1.09                  | 1                        | 1.10                  | 1                        | 1.12                  | 1                        | 1.10                  | 1                        |
| 13620115  | 1.23                  | 1                        | 1.09                  | 1                        | 0.99                  | 1                        | 1.10                  | 1                        |
| 13620116  | 2.92                  | 3                        | 2.44                  | 2                        | 2.42                  | 2                        | 2.59                  | 3                        |
| 13620117  | 2.61                  | 3                        | 2.72                  | 3                        | 2.76                  | 3                        | 2.69                  | 3                        |
| 13620120  | 2.44                  | 2                        | 2.38                  | 2                        | 2.08                  | 2                        | 2.30                  | 2                        |
| 13620121  | 1.08                  | 1                        | 1.09                  | 1                        | 1.11                  | 1                        | 1.09                  | 1                        |

| Sample ID | Copy Number           |                          |                       |                          |                       |                          |                       |                          |
|-----------|-----------------------|--------------------------|-----------------------|--------------------------|-----------------------|--------------------------|-----------------------|--------------------------|
|           | r = 1                 |                          | r = 2                 |                          | r = 3                 |                          | Average               |                          |
|           | Ratio<br>(target/ref) | Estimated<br>Copy Number |
| 13620125  | 1.82                  | 2                        | 1.46                  | 1                        | 1.88                  | 2                        | 1.72                  | 2                        |
| 13620127  | 4.88                  | 5                        | 4.41                  | 4                        | 3.89                  | 4                        | 4.39                  | 4                        |
| 13620128  | 2.35                  | 2                        | 2.23                  | 2                        | 1.94                  | 2                        | 2.17                  | 2                        |
| 13620130  | 1.45                  | 1                        | 1.08                  | 1                        | 1.17                  | 1                        | 1.23                  | 1                        |
| 13620132  | 1.11                  | 1                        | 1.21                  | 1                        | 0.88                  | 1                        | 1.07                  | 1                        |
| 13620134  | 0.99                  | 1                        | 1.02                  | 1                        | 0.92                  | 1                        | 0.98                  | 1                        |
| 13620135  | 4.02                  | 4                        | 4.18                  | 4                        | 3.85                  | 4                        | 4.02                  | 4                        |
| 13620136  | 2.44                  | 2                        | 2.42                  | 2                        | 2.21                  | 2                        | 2.36                  | 2                        |
| 13620137  | 1.78                  | 2                        | 2.04                  | 2                        | 2.06                  | 2                        | 1.96                  | 2                        |
| 13620138  | 1.37                  | 1                        | 1.34                  | 1                        | 1.27                  | 1                        | 1.33                  | 1                        |
| 13620139  | 1.15                  | 1                        | 1.05                  | 1                        | 0.96                  | 1                        | 1.05                  | 1                        |
| 13620140  | 2.45                  | 2                        | 2.72                  | 3                        | 2.50                  | 3                        | 2.56                  | 3                        |
| 13620143  | 1.16                  | 1                        | 1.21                  | 1                        | 1.15                  | 1                        | 1.17                  | 1                        |
| 13620144  | 1.17                  | 1                        | 1.26                  | 1                        | 1.27                  | 1                        | 1.23                  | 1                        |
| 13620146  | 2.06                  | 2                        | 2.29                  | 2                        | 2.11                  | 2                        | 2.16                  | 2                        |
| 13620151  | 1.27                  | 1                        | 1.53                  | 2                        | 1.25                  | 1                        | 1.35                  | 1                        |
| 13620152  | 1.15                  | 1                        | 1.42                  | 1                        | 1.21                  | 1                        | 1.26                  | 1                        |
| 13620153  | 2.31                  | 2                        | 2.22                  | 2                        | 2.04                  | 2                        | 2.19                  | 2                        |
| 13620154  | 2.84                  | 3                        | 2.19                  | 2                        | 2.30                  | 2                        | 2.44                  | 2                        |

| Sample ID | Copy Number           |                          |                       |                          |                       |                          |                       |                          |
|-----------|-----------------------|--------------------------|-----------------------|--------------------------|-----------------------|--------------------------|-----------------------|--------------------------|
|           | r = 1                 |                          | r = 2                 |                          | r = 3                 |                          | Average               |                          |
|           | Ratio<br>(target/ref) | Estimated<br>Copy Number |
| 13620155  | 0.91                  | 1                        | 1.07                  | 1                        | 1.11                  | 1                        | 1.03                  | 1                        |
| 13620158  | 1.03                  | 1                        | 1.04                  | 1                        | 0.88                  | 1                        | 0.98                  | 1                        |
| 13620159  | 1.12                  | 1                        | 1.13                  | 1                        | 1.27                  | 1                        | 1.17                  | 1                        |
| 13620161  | 0.86                  | 1                        | 0.85                  | 1                        | 1.29                  | 1                        | 1.00                  | 1                        |
| 13620162  | 2.25                  | 2                        | 2.30                  | 2                        | 2.23                  | 2                        | 2.26                  | 2                        |
| 13620163  | 4.30                  | 4                        | 4.33                  | 4                        | 3.58                  | 4                        | 4.07                  | 4                        |
| 13620164  | 4.32                  | 4                        | 4.08                  | 4                        | 4.54                  | 5                        | 4.32                  | 4                        |
| 13620165  | 6.53                  | 7                        | 5.96                  | 6                        | 6.86                  | 7                        | 6.45                  | 6                        |
| 13620166  | 1.58                  | 2                        | 1.61                  | 2                        | 1.75                  | 2                        | 1.65                  | 2                        |
| 13620167  | 1.91                  | 2                        | 1.96                  | 2                        | 2.12                  | 2                        | 2.00                  | 2                        |
| 13620168  | 0.84                  | 1                        | 0.92                  | 1                        | 0.85                  | 1                        | 0.87                  | 1                        |
| 13620169  | 3.71                  | 4                        | 2.91                  | 3                        | 3.23                  | 3                        | 3.28                  | 3                        |
| 13620170  | 3.23                  | 3                        | 3.26                  | 3                        | 2.92                  | 3                        | 3.13                  | 3                        |
| 13620172  | 1.52                  | 2                        | 1.66                  | 2                        | 1.76                  | 2                        | 1.65                  | 2                        |
| 13620175  | 1.41                  | 1                        | 1.13                  | 1                        | 1.23                  | 1                        | 1.26                  | 1                        |
| 13620176  | 1.07                  | 1                        | 1.23                  | 1                        | 1.08                  | 1                        | 1.13                  | 1                        |
| 13620177  | 3.84                  | 4                        | 4.11                  | 4                        | 3.77                  | 4                        | 3.91                  | 4                        |
| 13620179  | 2.07                  | 2                        | 2.54                  | 3                        | 2.18                  | 2                        | 2.26                  | 2                        |
| 13620180  | 1.16                  | 1                        | 1.13                  | 1                        | 1.16                  | 1                        | 1.15                  | 1                        |

| Sample ID | Copy Number           |                          |                       |                          |                       |                          |                       |                          |
|-----------|-----------------------|--------------------------|-----------------------|--------------------------|-----------------------|--------------------------|-----------------------|--------------------------|
|           | r = 1                 |                          | r = 2                 |                          | r = 3                 |                          | Average               |                          |
|           | Ratio<br>(target/ref) | Estimated<br>Copy Number |
| 13620181  | 3.81                  | 4                        | 3.30                  | 3                        | 3.45                  | 3                        | 3.52                  | 4                        |
| 13620182  | 0.82                  | 1                        | 0.84                  | 1                        | 0.90                  | 1                        | 0.85                  | 1                        |
| 13620183  | 3.93                  | 4                        | 3.45                  | 3                        | 3.96                  | 4                        | 3.78                  | 4                        |
| 13620185  | 3.92                  | 4                        | 4.32                  | 4                        | 3.91                  | 4                        | 4.05                  | 4                        |
| 13620186  | 2.19                  | 2                        | 2.12                  | 2                        | 2.14                  | 2                        | 2.15                  | 2                        |
| 13620188  | 1.13                  | 1                        | 1.13                  | 1                        | 1.08                  | 1                        | 1.11                  | 1                        |
| 13620190  | 2.95                  | 3                        | 2.85                  | 3                        | 2.91                  | 3                        | 2.91                  | 3                        |
| 13620195  | 1.11                  | 1                        | 1.10                  | 1                        | 1.20                  | 1                        | 1.14                  | 1                        |
| 13620196  | 1.90                  | 2                        | 2.28                  | 2                        | 2.00                  | 2                        | 2.06                  | 2                        |
| 13620200  | 2.50                  | 3                        | 2.81                  | 3                        | 2.33                  | 2                        | 2.55                  | 3                        |
| 13620202  | 0.94                  | 1                        | 1.14                  | 1                        | 1.03                  | 1                        | 1.04                  | 1                        |
| 13620203  | 1.04                  | 1                        | 1.29                  | 1                        | 1.04                  | 1                        | 1.12                  | 1                        |
| 13620209  | 1.48                  | 1                        | 1.27                  | 1                        | 1.13                  | 1                        | 1.29                  | 1                        |
| 13620210  | 2.17                  | 2                        | 1.93                  | 2                        | 1.82                  | 2                        | 1.97                  | 2                        |
| 13620211  | 2.11                  | 2                        | 2.07                  | 2                        | 2.35                  | 2                        | 2.18                  | 2                        |
| 13620218  | 2.07                  | 2                        | 2.10                  | 2                        | 2.08                  | 2                        | 2.08                  | 2                        |
| 13620219  | 2.15                  | 2                        | 1.96                  | 2                        | 2.09                  | 2                        | 2.06                  | 2                        |
| 13620220  | 3.77                  | 4                        | 2.76                  | 3                        | 3.44                  | 3                        | 3.32                  | 3                        |
| 13620223  | 1.96                  | 2                        | 1.92                  | 2                        | 1.93                  | 2                        | 1.94                  | 2                        |

| Sample ID | Copy Number           |                          |                       |                          |                       |                          |                       |                          |
|-----------|-----------------------|--------------------------|-----------------------|--------------------------|-----------------------|--------------------------|-----------------------|--------------------------|
|           | r = 1                 |                          | r = 2                 |                          | r = 3                 |                          | Average               |                          |
|           | Ratio<br>(target/ref) | Estimated<br>Copy Number |
| 13620225  | 1.07                  | 1                        | 1.13                  | 1                        | 1.09                  | 1                        | 1.10                  | 1                        |
| 13620226  | 0.96                  | 1                        | 1.06                  | 1                        | 1.17                  | 1                        | 1.07                  | 1                        |
| 13620227  | 1.00                  | 1                        | 1.00                  | 1                        | 1.09                  | 1                        | 1.03                  | 1                        |
| 13620228  | 10.17                 | 10                       | 11.86                 | 12                       | 10.90                 | 11                       | 10.98                 | 11                       |
| 13620229  | 6.59                  | 7                        | 7.02                  | 7                        | 6.00                  | 6                        | 6.54                  | 7                        |
| 13620230  | 5.60                  | 6                        | 7.04                  | 7                        | 6.31                  | 6                        | 6.32                  | 6                        |
| 13620231  | 6.12                  | 6                        | 5.91                  | 6                        | 4.63                  | 5                        | 5.56                  | 6                        |
| 13620232  | 3.65                  | 4                        | 3.31                  | 3                        | 2.81                  | 3                        | 3.25                  | 3                        |
| 13620239  | 1.28                  | 1                        | 1.09                  | 1                        | 1.31                  | 1                        | 1.22                  | 1                        |
| 13620240  | 0.37                  | 0                        | 0.34                  | 0                        | 0.33                  | 0                        | 0.35                  | 0                        |
| 13620241  | 2.14                  | 2                        | 2.02                  | 2                        | 1.98                  | 2                        | 2.05                  | 2                        |
| 13620242  | 1.06                  | 1                        | 1.03                  | 1                        | 1.12                  | 1                        | 1.07                  | 1                        |
| 13620244  | 1.48                  | 1                        | 1.73                  | 2                        | 1.68                  | 2                        | 1.63                  | 2                        |
| 13620245  | 2.59                  | 3                        | 2.00                  | 2                        | 2.41                  | 2                        | 2.33                  | 2                        |
| 13620246  | 1.89                  | 2                        | 1.61                  | 2                        | 1.27                  | 1                        | 1.59                  | 2                        |
| 13620256  | 1.10                  | 1                        | 1.01                  | 1                        | 1.10                  | 1                        | 1.07                  | 1                        |
| 13620257  | 1.06                  | 1                        | 1.15                  | 1                        | 1.18                  | 1                        | 1.13                  | 1                        |
| 13620260  | 2.00                  | 2                        | 1.86                  | 2                        | 2.09                  | 2                        | 1.98                  | 2                        |
| 13620261  | 1.81                  | 2                        | 1.94                  | 2                        | 2.15                  | 2                        | 1.97                  | 2                        |

| Sample ID | Copy Number           |                          |                       |                          |                       |                          |                       |                          |
|-----------|-----------------------|--------------------------|-----------------------|--------------------------|-----------------------|--------------------------|-----------------------|--------------------------|
|           | r = 1                 |                          | r = 2                 |                          | r = 3                 |                          | Average               |                          |
|           | Ratio<br>(target/ref) | Estimated<br>Copy Number |
| 13620266  | 0.94                  | 1                        | 0.75                  | 1                        | 0.76                  | 1                        | 0.81                  | 1                        |
| 13620267  | 1.37                  | 1                        | 1.26                  | 1                        | 1.16                  | 1                        | 1.27                  | 1                        |
| 13620268  | 1.42                  | 1                        | 1.58                  | 2                        | 1.64                  | 2                        | 1.55                  | 2                        |
| 13620269  | 1.33                  | 1                        | 1.39                  | 1                        | 1.41                  | 1                        | 1.38                  | 1                        |
| 13620270  | 1.24                  | 1                        | 1.19                  | 1                        | 1.16                  | 1                        | 1.20                  | 1                        |
| 13620272  | 2.23                  | 2                        | 1.74                  | 2                        | 1.82                  | 2                        | 1.93                  | 2                        |
| 13620276  | 2.42                  | 2                        | 2.31                  | 2                        | 2.21                  | 2                        | 2.31                  | 2                        |
| 13620278  | 2.05                  | 2                        | 2.19                  | 2                        | 2.74                  | 3                        | 2.33                  | 2                        |
| 13620282  | 2.74                  | 3                        | 2.89                  | 3                        | 2.82                  | 3                        | 2.82                  | 3                        |
| 13620287  | 1.31                  | 1                        | 1.13                  | 1                        | 1.37                  | 1                        | 1.27                  | 1                        |
| 13620289  | 1.28                  | 1                        | 1.11                  | 1                        | 1.11                  | 1                        | 1.17                  | 1                        |
| 13620290  | 2.28                  | 2                        | 2.50                  | 3                        | 1.95                  | 2                        | 2.24                  | 2                        |
| 13620291  | 2.04                  | 2                        | 1.86                  | 2                        | 2.16                  | 2                        | 2.02                  | 2                        |
| 13620294  | 2.13                  | 2                        | 1.95                  | 2                        | 1.95                  | 2                        | 2.01                  | 2                        |
| 13620295  | 2.40                  | 2                        | 2.32                  | 2                        | 2.57                  | 3                        | 2.43                  | 2                        |
| 13620296  | 1.18                  | 1                        | 1.36                  | 1                        | 1.19                  | 1                        | 1.24                  | 1                        |
| 13620297  | 1.35                  | 1                        | 1.27                  | 1                        | 1.29                  | 1                        | 1.30                  | 1                        |
| 13620298  | 1.11                  | 1                        | 1.26                  | 1                        | 1.04                  | 1                        | 1.14                  | 1                        |
| 13620300  | 1.88                  | 2                        | 1.61                  | 2                        | 1.67                  | 2                        | 1.72                  | 2                        |



| Sample ID | Copy Number           |                          |                       |                          |                       |                          |                       |                          |
|-----------|-----------------------|--------------------------|-----------------------|--------------------------|-----------------------|--------------------------|-----------------------|--------------------------|
|           | r = 1                 |                          | r = 2                 |                          | r = 3                 |                          | Average               |                          |
|           | Ratio<br>(target/ref) | Estimated<br>Copy Number |
| 13620301  | 1.21                  | 1                        | 1.11                  | 1                        | 0.95                  | 1                        | 1.09                  | 1                        |
| 13620307  | 2.15                  | 2                        | 1.89                  | 2                        | 2.16                  | 2                        | 2.07                  | 2                        |
| 13620308  | 2.37                  | 2                        | 2.32                  | 2                        | 2.15                  | 2                        | 2.28                  | 2                        |
| 13620309  | 1.77                  | 2                        | 1.61                  | 2                        | 1.67                  | 2                        | 1.68                  | 2                        |
| 13620311  | 0.98                  | 1                        | 0.89                  | 1                        | 1.27                  | 1                        | 1.05                  | 1                        |
| 13620314  | 2.50                  | 3                        | 3.17                  | 3                        | 3.05                  | 3                        | 2.91                  | 3                        |
| 13620315  | 5.56                  | 6                        | 6.17                  | 6                        | 4.96                  | 5                        | 5.56                  | 6                        |
| 13620316  | 0.87                  | 1                        | 1.00                  | 1                        | 0.83                  | 1                        | 0.90                  | 1                        |
| 13620319  | 3.21                  | 3                        | 3.62                  | 4                        | 3.16                  | 3                        | 3.33                  | 3                        |
| 13620320  | 2.30                  | 2                        | 2.34                  | 2                        | 2.54                  | 3                        | 2.39                  | 2                        |
| 13620321  | 1.15                  | 1                        | 1.18                  | 1                        | 1.05                  | 1                        | 1.13                  | 1                        |
| 13620323  | 2.09                  | 2                        | 2.42                  | 2                        | 2.25                  | 2                        | 2.25                  | 2                        |
| 13620325  | 6.09                  | 6                        | 6.44                  | 6                        | 6.37                  | 6                        | 6.30                  | 6                        |
| 13620328  | 1.21                  | 1                        | 1.20                  | 1                        | 0.96                  | 1                        | 1.12                  | 1                        |
| 13620329  | 2.10                  | 2                        | 1.81                  | 2                        | 1.36                  | 1                        | 1.76                  | 2                        |
| 13620335  | 1.07                  | 1                        | 1.05                  | 1                        | 1.10                  | 1                        | 1.07                  | 1                        |
| 13620336  | 1.67                  | 2                        | 1.69                  | 2                        | 2.18                  | 2                        | 1.84                  | 2                        |
| 13620339  | 1.08                  | 1                        | 1.26                  | 1                        | 1.28                  | 1                        | 1.20                  | 1                        |
| 13620340  | 2.20                  | 2                        | 2.42                  | 2                        | 2.14                  | 2                        | 2.25                  | 2                        |

| Sample ID | Copy Number           |                          |                       |                          |                       |                          |                       |                          |
|-----------|-----------------------|--------------------------|-----------------------|--------------------------|-----------------------|--------------------------|-----------------------|--------------------------|
|           | r = 1                 |                          | r = 2                 |                          | r = 3                 |                          | Average               |                          |
|           | Ratio<br>(target/ref) | Estimated<br>Copy Number |
| 13620341  | 2.02                  | 2                        | 2.17                  | 2                        | 1.83                  | 2                        | 2.01                  | 2                        |
| 13620342  | 2.27                  | 2                        | 2.35                  | 2                        | 2.02                  | 2                        | 2.21                  | 2                        |
| 13620347  | 6.86                  | 7                        | 5.92                  | 6                        | 6.26                  | 6                        | 6.35                  | 6                        |
| 13620349  | 2.26                  | 2                        | 2.18                  | 2                        | 2.26                  | 2                        | 2.23                  | 2                        |
| 13620351  | 2.82                  | 3                        | 3.31                  | 3                        | 2.78                  | 3                        | 2.97                  | 3                        |
| 13620355  | 5.69                  | 6                        | 5.40                  | 5                        | 4.82                  | 5                        | 5.30                  | 5                        |
| 13620356  | 2.33                  | 2                        | 2.43                  | 2                        | 2.25                  | 2                        | 2.34                  | 2                        |
| 13620361  | 1.15                  | 1                        | 1.36                  | 1                        | 1.08                  | 1                        | 1.20                  | 1                        |
| 13620363  | 1.39                  | 1                        | 1.20                  | 1                        | 1.45                  | 1                        | 1.35                  | 1                        |
| 13620365  | 4.66                  | 5                        | 4.76                  | 5                        | 4.83                  | 5                        | 4.75                  | 5                        |
| 13620367  | 1.58                  | 2                        | 0.92                  | 1                        | 0.88                  | 1                        | 1.12                  | 1                        |
| 13620368  | 2.31                  | 2                        | 2.23                  | 2                        | 2.20                  | 2                        | 2.24                  | 2                        |
| 13620370  | 1.94                  | 2                        | 1.85                  | 2                        | 1.94                  | 2                        | 1.91                  | 2                        |
| 13620373  | 0.90                  | 1                        | 1.05                  | 1                        | 1.00                  | 1                        | 0.98                  | 1                        |
| 13620375  | 1.30                  | 1                        | 1.18                  | 1                        | 1.38                  | 1                        | 1.29                  | 1                        |
| 13620376  | 1.01                  | 1                        | 1.21                  | 1                        | 1.42                  | 1                        | 1.21                  | 1                        |
| 13620377  | 2.36                  | 2                        | 2.40                  | 2                        | 2.37                  | 2                        | 2.38                  | 2                        |
| 13620378  | 2.30                  | 2                        | 2.13                  | 2                        | 2.07                  | 2                        | 2.16                  | 2                        |
| 13620379  | 2.21                  | 2                        | 1.87                  | 2                        | 2.20                  | 2                        | 2.09                  | 2                        |

| Sample ID | Copy Number           |                          |                       |                          |                       |                          |                       |                          |
|-----------|-----------------------|--------------------------|-----------------------|--------------------------|-----------------------|--------------------------|-----------------------|--------------------------|
|           | r = 1                 |                          | r = 2                 |                          | r = 3                 |                          | Average               |                          |
|           | Ratio<br>(target/ref) | Estimated<br>Copy Number |
| 13620382  | 2.27                  | 2                        | 2.15                  | 2                        | 1.96                  | 2                        | 2.13                  | 2                        |
| 13620383  | 2.83                  | 3                        | 3.30                  | 3                        | 2.98                  | 3                        | 3.04                  | 3                        |
| 13620387  | 1.17                  | 1                        | 1.22                  | 1                        | 1.20                  | 1                        | 1.20                  | 1                        |
| 13620390  | 2.39                  | 2                        | 2.11                  | 2                        | 2.17                  | 2                        | 2.22                  | 2                        |
| 13620391  | 1.57                  | 2                        | 1.07                  | 1                        | 1.20                  | 1                        | 1.28                  | 1                        |
| 13620400  | 2.97                  | 3                        | 3.56                  | 4                        | 3.14                  | 3                        | 3.22                  | 3                        |
| 13620401  | 1.14                  | 1                        | 1.14                  | 1                        | 1.16                  | 1                        | 1.14                  | 1                        |
| 13620402  | 2.80                  | 3                        | 2.86                  | 3                        | 3.18                  | 3                        | 2.95                  | 3                        |
| 13620403  | 3.16                  | 3                        | 2.95                  | 3                        | 3.06                  | 3                        | 3.06                  | 3                        |
| 13620408  | 2.13                  | 2                        | 2.00                  | 2                        | 1.93                  | 2                        | 2.02                  | 2                        |
| 13620410  | 3.61                  | 4                        | 3.77                  | 4                        | 3.07                  | 3                        | 3.48                  | 3                        |
| 13620416  | 2.90                  | 3                        | 3.40                  | 3                        | 3.05                  | 3                        | 3.12                  | 3                        |
| 13620417  | 3.57                  | 4                        | 3.68                  | 4                        | 3.58                  | 4                        | 3.61                  | 4                        |
| 13620418  | 3.71                  | 4                        | 3.54                  | 4                        | 3.69                  | 4                        | 3.65                  | 4                        |
| 13620426  | 1.42                  | 1                        | 1.39                  | 1                        | 1.32                  | 1                        | 1.38                  | 1                        |
| 13620427  | 1.93                  | 2                        | 1.91                  | 2                        | 1.68                  | 2                        | 1.84                  | 2                        |
| 13620433  | 3.30                  | 3                        | 3.05                  | 3                        | 3.06                  | 3                        | 3.14                  | 3                        |
| 13620434  | 2.29                  | 2                        | 2.27                  | 2                        | 2.20                  | 2                        | 2.25                  | 2                        |
| 13620435  | 2.25                  | 2                        | 2.12                  | 2                        | 2.37                  | 2                        | 2.25                  | 2                        |

| Sample ID | Copy Number           |                          |                       |                          |                       |                          |                       |                          |
|-----------|-----------------------|--------------------------|-----------------------|--------------------------|-----------------------|--------------------------|-----------------------|--------------------------|
|           | r = 1                 |                          | r = 2                 |                          | r = 3                 |                          | Average               |                          |
|           | Ratio<br>(target/ref) | Estimated<br>Copy Number |
| 13620436  | 2.25                  | 2                        | 2.16                  | 2                        | 2.26                  | 2                        | 2.22                  | 2                        |
| 13620437  | 2.39                  | 2                        | 2.38                  | 2                        | 2.57                  | 3                        | 2.44                  | 2                        |
| 13620438  | 1.12                  | 1                        | 1.08                  | 1                        | 1.10                  | 1                        | 1.10                  | 1                        |
| 13620440  | 2.34                  | 2                        | 2.38                  | 2                        | 2.37                  | 2                        | 2.36                  | 2                        |
| 13620442  | 2.30                  | 2                        | 2.28                  | 2                        | 2.38                  | 2                        | 2.32                  | 2                        |
| 13620444  | 1.43                  | 1                        | 1.60                  | 2                        | 1.49                  | 1                        | 1.51                  | 2                        |
| 13620445  | 0.95                  | 1                        | 1.06                  | 1                        | 0.98                  | 1                        | 0.99                  | 1                        |
| 13620447  | 3.69                  | 4                        | 3.77                  | 4                        | 4.10                  | 4                        | 3.85                  | 4                        |
| 13620448  | 3.93                  | 4                        | 4.05                  | 4                        | 4.23                  | 4                        | 4.07                  | 4                        |
| 13620449  | 3.60                  | 4                        | 3.47                  | 3                        | 3.53                  | 4                        | 3.53                  | 4                        |
| 13620451  | 1.12                  | 1                        | 1.29                  | 1                        | 1.29                  | 1                        | 1.23                  | 1                        |
| 13620452  | 2.56                  | 3                        | 2.96                  | 3                        | 2.71                  | 3                        | 2.74                  | 3                        |
| 13620455  | 2.29                  | 2                        | 2.44                  | 2                        | 2.79                  | 3                        | 2.51                  | 3                        |
| 13620456  | 1.85                  | 2                        | 2.07                  | 2                        | 2.22                  | 2                        | 2.04                  | 2                        |
| 13620459  | 1.26                  | 1                        | 1.23                  | 1                        | 1.21                  | 1                        | 1.24                  | 1                        |
| 13620460  | 1.25                  | 1                        | 1.25                  | 1                        | 1.25                  | 1                        | 1.25                  | 1                        |
| 13620461  | 1.32                  | 1                        | 1.35                  | 1                        | 1.32                  | 1                        | 1.33                  | 1                        |
| 13620462  | 1.31                  | 1                        | 1.33                  | 1                        | 1.30                  | 1                        | 1.32                  | 1                        |
| 13620467  | 1.32                  | 1                        | 1.28                  | 1                        | 1.30                  | 1                        | 1.30                  | 1                        |

| Sample ID | Copy Number           |                          |                       |                          |                       |                          |                       |                          |
|-----------|-----------------------|--------------------------|-----------------------|--------------------------|-----------------------|--------------------------|-----------------------|--------------------------|
|           | r = 1                 |                          | r = 2                 |                          | r = 3                 |                          | Average               |                          |
|           | Ratio<br>(target/ref) | Estimated<br>Copy Number |
| 13620468  | 1.13                  | 1                        | 0.98                  | 1                        | 1.05                  | 1                        | 1.05                  | 1                        |
| 13620470  | 1.60                  | 2                        | 1.74                  | 2                        | 1.84                  | 2                        | 1.73                  | 2                        |
| 13620471  | 1.73                  | 2                        | 1.68                  | 2                        | 1.42                  | 1                        | 1.61                  | 2                        |
| 13620472  | 2.69                  | 3                        | 3.67                  | 4                        | 3.25                  | 3                        | 3.20                  | 3                        |
| 13620473  | 2.35                  | 2                        | 1.85                  | 2                        | 2.28                  | 2                        | 2.16                  | 2                        |
| 13620475  | 0.91                  | 1                        | 1.20                  | 1                        | 1.15                  | 1                        | 1.08                  | 1                        |
| 13620476  | 2.23                  | 2                        | 1.95                  | 2                        | 2.68                  | 3                        | 2.29                  | 2                        |
| 13620477  | 1.71                  | 2                        | 1.01                  | 1                        | 1.39                  | 1                        | 1.37                  | 1                        |
| 13620479  | 1.74                  | 2                        | 2.51                  | 3                        | 2.28                  | 2                        | 2.18                  | 2                        |
| 13620482  | 3.01                  | 3                        | 3.72                  | 4                        | 3.49                  | 3                        | 3.41                  | 3                        |
| 13620485  | 3.07                  | 3                        | 3.58                  | 4                        | 3.41                  | 3                        | 3.35                  | 3                        |
| 13620487  | 7.83                  | 8                        | 7.96                  | 8                        | 8.65                  | 9                        | 8.15                  | 8                        |
| 13620492  | 1.50                  | 2                        | 1.50                  | 1                        | 1.48                  | 1                        | 1.49                  | 1                        |
| 13620493  | 2.68                  | 3                        | 2.97                  | 3                        | 3.07                  | 3                        | 2.90                  | 3                        |
| 13620495  | 2.08                  | 2                        | 1.52                  | 2                        | 1.49                  | 1                        | 1.70                  | 2                        |
| 13620497  | 2.52                  | 3                        | 1.99                  | 2                        | 2.26                  | 2                        | 2.26                  | 2                        |
| 13620503  | 3.09                  | 3                        | 3.58                  | 4                        | 3.36                  | 3                        | 3.35                  | 3                        |
| 13620504  | 2.84                  | 3                        | 2.34                  | 2                        | 2.30                  | 2                        | 2.49                  | 2                        |
| 13620505  | 1.34                  | 1                        | 1.15                  | 1                        | 1.47                  | 1                        | 1.32                  | 1                        |

| Sample ID | Copy Number           |                          |                       |                          |                       |                          |                       |                          |
|-----------|-----------------------|--------------------------|-----------------------|--------------------------|-----------------------|--------------------------|-----------------------|--------------------------|
|           | r = 1                 |                          | r = 2                 |                          | r = 3                 |                          | Average               |                          |
|           | Ratio<br>(target/ref) | Estimated<br>Copy Number |
| 13620507  | 1.62                  | 2                        | 2.12                  | 2                        | 2.17                  | 2                        | 1.97                  | 2                        |
| 13620511  | 4.49                  | 4                        | 4.30                  | 4                        | 4.58                  | 5                        | 4.46                  | 4                        |
| 13620512  | 2.79                  | 3                        | 2.88                  | 3                        | 2.95                  | 3                        | 2.87                  | 3                        |
| 13620513  | 1.81                  | 2                        | 1.68                  | 2                        | 1.55                  | 2                        | 1.68                  | 2                        |
| 13620514  | 1.06                  | 1                        | 0.94                  | 1                        | 0.96                  | 1                        | 0.99                  | 1                        |
| 13620516  | 1.09                  | 1                        | 1.07                  | 1                        | 0.86                  | 1                        | 1.01                  | 1                        |
| 13620521  | 1.59                  | 2                        | 1.32                  | 1                        | 1.56                  | 2                        | 1.49                  | 1                        |
| 13620523  | 1.77                  | 2                        | 1.66                  | 2                        | 1.89                  | 2                        | 1.77                  | 2                        |
| 13620525  | 3.70                  | 4                        | 3.95                  | 4                        | 3.58                  | 4                        | 3.74                  | 4                        |
| 13620526  | 1.16                  | 1                        | 1.44                  | 1                        | 1.38                  | 1                        | 1.33                  | 1                        |
| 13620527  | 0.51                  | 1                        | 0.61                  | 1                        | 0.53                  | 1                        | 0.55                  | 1                        |
| 13620528  | 0.83                  | 1                        | 0.70                  | 1                        | 0.56                  | 1                        | 0.70                  | 1                        |
| 13620530  | 1.06                  | 1                        | 1.25                  | 1                        | 1.19                  | 1                        | 1.17                  | 1                        |
| 13620531  | 0.68                  | 1                        | 0.75                  | 1                        | 0.80                  | 1                        | 0.75                  | 1                        |
| 13620532  | 2.08                  | 2                        | 1.81                  | 2                        | 2.17                  | 2                        | 2.02                  | 2                        |
| 13620533  | 1.68                  | 2                        | 1.78                  | 2                        | 2.33                  | 2                        | 1.93                  | 2                        |
| 13620534  | 1.39                  | 1                        | 1.14                  | 1                        | 1.35                  | 1                        | 1.29                  | 1                        |
| 13620537  | 1.72                  | 2                        | 2.03                  | 2                        | 2.16                  | 2                        | 1.97                  | 2                        |
| 13620539  | 3.79                  | 4                        | 3.47                  | 3                        | 4.55                  | 5                        | 3.94                  | 4                        |

| Sample ID | Copy Number           |                          |                       |                          |                       |                          |                       |                          |
|-----------|-----------------------|--------------------------|-----------------------|--------------------------|-----------------------|--------------------------|-----------------------|--------------------------|
|           | r = 1                 |                          | r = 2                 |                          | r = 3                 |                          | Average               |                          |
|           | Ratio<br>(target/ref) | Estimated<br>Copy Number |
| 13620545  | 0.89                  | 1                        | 0.79                  | 1                        | 0.95                  | 1                        | 0.88                  | 1                        |
| 13620553  | 0.92                  | 1                        | 0.89                  | 1                        | 0.92                  | 1                        | 0.91                  | 1                        |
| 13620557  | 1.37                  | 1                        | 1.17                  | 1                        | 1.43                  | 1                        | 1.33                  | 1                        |
| 13620558  | 1.07                  | 1                        | 1.19                  | 1                        | 1.15                  | 1                        | 1.14                  | 1                        |
| 13620562  | 1.25                  | 1                        | 1.12                  | 1                        | 1.25                  | 1                        | 1.21                  | 1                        |
| 13620563  | 1.05                  | 1                        | 1.30                  | 1                        | 1.06                  | 1                        | 1.14                  | 1                        |
| 13620566  | 4.42                  | 4                        | 4.82                  | 5                        | 3.81                  | 4                        | 4.35                  | 4                        |
| 13620569  | 2.69                  | 3                        | 3.05                  | 3                        | 2.97                  | 3                        | 2.90                  | 3                        |
| 13620572  | 2.93                  | 3                        | 2.49                  | 2                        | 2.37                  | 2                        | 2.60                  | 3                        |
| 13620574  | 1.93                  | 2                        | 2.12                  | 2                        | 1.95                  | 2                        | 2.00                  | 2                        |
| 13620575  | 1.80                  | 2                        | 2.06                  | 2                        | 2.22                  | 2                        | 2.03                  | 2                        |
| 13620578  | 4.04                  | 4                        | 4.11                  | 4                        | 4.85                  | 5                        | 4.33                  | 4                        |
| 13620586  | 4.17                  | 4                        | 3.95                  | 4                        | 3.87                  | 4                        | 4.00                  | 4                        |
| 13620588  | 1.34                  | 1                        | 1.22                  | 1                        | 1.04                  | 1                        | 1.20                  | 1                        |
| 13620589  | 7.56                  | 8                        | 5.76                  | 6                        | 6.93                  | 7                        | 6.75                  | 7                        |
| 13620590  | 4.87                  | 5                        | 4.77                  | 5                        | 5.55                  | 6                        | 5.06                  | 5                        |
| 13620592  | 1.38                  | 1                        | 1.35                  | 1                        | 1.75                  | 2                        | 1.49                  | 1                        |
| 13620593  | 1.66                  | 2                        | 1.60                  | 2                        | 1.68                  | 2                        | 1.64                  | 2                        |
| 13620595  | 1.11                  | 1                        | 1.07                  | 1                        | 1.02                  | 1                        | 1.07                  | 1                        |

| Sample ID | Copy Number           |                          |                       |                          |                       |                          |                       |                          |
|-----------|-----------------------|--------------------------|-----------------------|--------------------------|-----------------------|--------------------------|-----------------------|--------------------------|
|           | r = 1                 |                          | r = 2                 |                          | r = 3                 |                          | Average               |                          |
|           | Ratio<br>(target/ref) | Estimated<br>Copy Number |
| 13620596  | 1.23                  | 1                        | 1.33                  | 1                        | 1.08                  | 1                        | 1.21                  | 1                        |
| 13620598  | 1.20                  | 1                        | 1.41                  | 1                        | 1.26                  | 1                        | 1.29                  | 1                        |
| 13620599  | 7.16                  | 7                        | 7.18                  | 7                        | 9.47                  | 9                        | 7.94                  | 8                        |
| 13620600  | 0.05                  | 0                        | 0.04                  | 0                        | 0.05                  | 0                        | 0.05                  | 0                        |
| 13620601  | 1.02                  | 1                        | 0.94                  | 1                        | 1.08                  | 1                        | 1.01                  | 1                        |
| 13620602  | 0.51                  | 1                        | 0.49                  | 0                        | 0.52                  | 1                        | 0.51                  | 1                        |
| 13620604  | 1.21                  | 1                        | 1.06                  | 1                        | 1.11                  | 1                        | 1.13                  | 1                        |
| 13620606  | 1.29                  | 1                        | 1.41                  | 1                        | 1.14                  | 1                        | 1.28                  | 1                        |
| 13620607  | 1.14                  | 1                        | 1.13                  | 1                        | 1.20                  | 1                        | 1.16                  | 1                        |
| 13620608  | 1.69                  | 2                        | 1.51                  | 2                        | 1.52                  | 2                        | 1.57                  | 2                        |
| 13620609  | 1.15                  | 1                        | 1.32                  | 1                        | 1.27                  | 1                        | 1.24                  | 1                        |
| 13620610  | 2.38                  | 2                        | 2.71                  | 3                        | 2.55                  | 3                        | 2.55                  | 3                        |
| 13620611  | 6.75                  | 7                        | 6.79                  | 7                        | 5.34                  | 5                        | 6.29                  | 6                        |
| 13620612  | 3.51                  | 4                        | 2.89                  | 3                        | 3.23                  | 3                        | 3.21                  | 3                        |
| 13620613  | 1.71                  | 2                        | 1.63                  | 2                        | 1.58                  | 2                        | 1.64                  | 2                        |
| 13620616  | 0.66                  | 1                        | 0.62                  | 1                        | 0.67                  | 1                        | 0.65                  | 1                        |
| 13620617  | 5.91                  | 6                        | 5.74                  | 6                        | 7.16                  | 7                        | 6.27                  | 6                        |
| 13620618  | 4.73                  | 5                        | 5.34                  | 5                        | 5.07                  | 5                        | 5.04                  | 5                        |
| 13620619  | 3.51                  | 4                        | 3.88                  | 4                        | 3.58                  | 4                        | 3.66                  | 4                        |



| Sample ID | Copy Number           |                          |                       |                          |                       |                          |                       |                          |
|-----------|-----------------------|--------------------------|-----------------------|--------------------------|-----------------------|--------------------------|-----------------------|--------------------------|
|           | r = 1                 |                          | r = 2                 |                          | r = 3                 |                          | Average               |                          |
|           | Ratio<br>(target/ref) | Estimated<br>Copy Number |
| 13620625  | 4.21                  | 4                        | 3.20                  | 3                        | 3.32                  | 3                        | 3.58                  | 4                        |
| 13620627  | 7.45                  | 7                        | 6.96                  | 7                        | 7.29                  | 7                        | 7.23                  | 7                        |
| 13620630  | 3.54                  | 4                        | 3.67                  | 4                        | 3.62                  | 4                        | 3.61                  | 4                        |
| 13620633  | 1.13                  | 1                        | 1.29                  | 1                        | 1.29                  | 1                        | 1.24                  | 1                        |
| 13620636  | 1.11                  | 1                        | 0.93                  | 1                        | 1.27                  | 1                        | 1.10                  | 1                        |
| 13620637  | 1.12                  | 1                        | 1.08                  | 1                        | 1.23                  | 1                        | 1.14                  | 1                        |
| 13620638  | 2.27                  | 2                        | 1.96                  | 2                        | 2.15                  | 2                        | 2.13                  | 2                        |
| 13620640  | 2.41                  | 2                        | 2.40                  | 2                        | 2.48                  | 2                        | 2.43                  | 2                        |
| 13620641  | 2.11                  | 2                        | 2.40                  | 2                        | 2.29                  | 2                        | 2.27                  | 2                        |
| 13620642  | 3.14                  | 3                        | 3.09                  | 3                        | 3.27                  | 3                        | 3.17                  | 3                        |
| 13620644  | 1.03                  | 1                        | 1.16                  | 1                        | 1.10                  | 1                        | 1.10                  | 1                        |
| 13620645  | 1.34                  | 1                        | 1.35                  | 1                        | 1.15                  | 1                        | 1.28                  | 1                        |
| 13620647  | 1.56                  | 2                        | 1.75                  | 2                        | 1.54                  | 2                        | 1.62                  | 2                        |
| 13620648  | 2.10                  | 2                        | 1.60                  | 2                        | 2.01                  | 2                        | 1.90                  | 2                        |
| 13620649  | 3.24                  | 3                        | 3.06                  | 3                        | 1.94                  | 2                        | 2.75                  | 3                        |
| 13620650  | 1.71                  | 2                        | 1.63                  | 2                        | 1.85                  | 2                        | 1.73                  | 2                        |
| 13620652  | 2.24                  | 2                        | 2.15                  | 2                        | 2.42                  | 2                        | 2.27                  | 2                        |
| 13620660  | 1.16                  | 1                        | 1.25                  | 1                        | 1.11                  | 1                        | 1.17                  | 1                        |
| 13620661  | 0.65                  | 1                        | 0.75                  | 1                        | 0.67                  | 1                        | 0.69                  | 1                        |

| Sample ID | Copy Number           |                          |                       |                          |                       |                          |                       |                          |
|-----------|-----------------------|--------------------------|-----------------------|--------------------------|-----------------------|--------------------------|-----------------------|--------------------------|
|           | r = 1                 |                          | r = 2                 |                          | r = 3                 |                          | Average               |                          |
|           | Ratio<br>(target/ref) | Estimated<br>Copy Number |
| 13620663  | 0.89                  | 1                        | 0.99                  | 1                        | 0.88                  | 1                        | 0.92                  | 1                        |
| 13620674  | 1.24                  | 1                        | 1.34                  | 1                        | 1.07                  | 1                        | 1.22                  | 1                        |
| 13620675  | 1.06                  | 1                        | 1.09                  | 1                        | 1.05                  | 1                        | 1.07                  | 1                        |
| 13620678  | 1.40                  | 1                        | 1.32                  | 1                        | 1.12                  | 1                        | 1.28                  | 1                        |
| 13620679  | 1.12                  | 1                        | 1.27                  | 1                        | 1.65                  | 2                        | 1.35                  | 1                        |
| 13620681  | 1.81                  | 2                        | 1.88                  | 2                        | 1.86                  | 2                        | 1.85                  | 2                        |
| 13620682  | 4.38                  | 4                        | 4.15                  | 4                        | 3.97                  | 4                        | 4.17                  | 4                        |
| 13620684  | 1.50                  | 1                        | 1.32                  | 1                        | 1.45                  | 1                        | 1.42                  | 1                        |
| 13620689  | 2.49                  | 2                        | 2.68                  | 3                        | 2.47                  | 2                        | 2.54                  | 3                        |
| 13620690  | 6.15                  | 6                        | 5.91                  | 6                        | 5.79                  | 6                        | 5.95                  | 6                        |
| 13620691  | 1.97                  | 2                        | 2.07                  | 2                        | 1.99                  | 2                        | 2.01                  | 2                        |
| 13620692  | 4.59                  | 5                        | 4.04                  | 4                        | 4.74                  | 5                        | 4.46                  | 4                        |
| 13620694  | 3.54                  | 4                        | 3.62                  | 4                        | 3.00                  | 3                        | 3.39                  | 3                        |
| 13620695  | 2.89                  | 3                        | 2.95                  | 3                        | 3.24                  | 3                        | 3.03                  | 3                        |
| 13620876  | 1.00                  | 1                        | 1.06                  | 1                        | 0.91                  | 1                        | 0.99                  | 1                        |
| 13620877  | 0.90                  | 1                        | 1.21                  | 1                        | 1.22                  | 1                        | 1.11                  | 1                        |
| 13620878  | 1.73                  | 2                        | 1.51                  | 2                        | 1.99                  | 2                        | 1.74                  | 2                        |
| 13620879  | 1.88                  | 2                        | 2.10                  | 2                        | 2.33                  | 2                        | 2.10                  | 2                        |
| 13620880  | 2.85                  | 3                        | 3.14                  | 3                        | 2.45                  | 2                        | 2.81                  | 3                        |

| Sample ID | Copy Number           |                          |                       |                          |                       |                          |                       |                          |
|-----------|-----------------------|--------------------------|-----------------------|--------------------------|-----------------------|--------------------------|-----------------------|--------------------------|
|           | r = 1                 |                          | r = 2                 |                          | r = 3                 |                          | Average               |                          |
|           | Ratio<br>(target/ref) | Estimated<br>Copy Number |
| 13620881  | 1.05                  | 1                        | 1.05                  | 1                        | 1.26                  | 1                        | 1.12                  | 1                        |
| 13620884  | 1.99                  | 2                        | 1.78                  | 2                        | 1.94                  | 2                        | 1.90                  | 2                        |
| 13620885  | 1.81                  | 2                        | 1.95                  | 2                        | 2.09                  | 2                        | 1.95                  | 2                        |
| 13620887  | 1.05                  | 1                        | 0.92                  | 1                        | 0.98                  | 1                        | 0.99                  | 1                        |
| 13620888  | 1.29                  | 1                        | 1.33                  | 1                        | 1.23                  | 1                        | 1.29                  | 1                        |
| 13620890  | 1.13                  | 1                        | 1.16                  | 1                        | 1.25                  | 1                        | 1.18                  | 1                        |
| 13620893  | 0.93                  | 1                        | 1.21                  | 1                        | 1.11                  | 1                        | 1.09                  | 1                        |
| 13620894  | 1.68                  | 2                        | 1.38                  | 1                        | 1.36                  | 1                        | 1.47                  | 1                        |
| 13620898  | 7.97                  | 8                        | 6.85                  | 7                        | 7.08                  | 7                        | 7.30                  | 7                        |
| 13620899  | 0.89                  | 1                        | 1.07                  | 1                        | 0.89                  | 1                        | 0.95                  | 1                        |
| 13620900  | 1.90                  | 2                        | 2.13                  | 2                        | 2.08                  | 2                        | 2.03                  | 2                        |
| 13620907  | 3.53                  | 4                        | 3.76                  | 4                        | 3.50                  | 3                        | 3.60                  | 4                        |
| 13620914  | 4.04                  | 4                        | 3.34                  | 3                        | 4.07                  | 4                        | 3.82                  | 4                        |
| 13620917  | 2.99                  | 3                        | 3.12                  | 3                        | 3.21                  | 3                        | 3.11                  | 3                        |
| 13620918  | 2.72                  | 3                        | 2.95                  | 3                        | 2.90                  | 3                        | 2.86                  | 3                        |
| 13620921  | 3.56                  | 4                        | 3.50                  | 3                        | 3.65                  | 4                        | 3.57                  | 4                        |
| 13620922  | 1.00                  | 1                        | 1.27                  | 1                        | 1.10                  | 1                        | 1.12                  | 1                        |
| 13620923  | 1.85                  | 2                        | 1.89                  | 2                        | 1.78                  | 2                        | 1.84                  | 2                        |
| 13620924  | 3.86                  | 4                        | 3.61                  | 4                        | 3.49                  | 3                        | 3.66                  | 4                        |

| Sample ID | Copy Number           |                          |                       |                          |                       |                          |                       |                          |
|-----------|-----------------------|--------------------------|-----------------------|--------------------------|-----------------------|--------------------------|-----------------------|--------------------------|
|           | r = 1                 |                          | r = 2                 |                          | r = 3                 |                          | Average               |                          |
|           | Ratio<br>(target/ref) | Estimated<br>Copy Number |
| 13620925  | 2.44                  | 2                        | 2.39                  | 2                        | 2.44                  | 2                        | 2.42                  | 2                        |
| 13620928  | 1.86                  | 2                        | 2.43                  | 2                        | 1.89                  | 2                        | 2.06                  | 2                        |
| 13620929  | 1.21                  | 1                        | 1.55                  | 2                        | 1.63                  | 2                        | 1.46                  | 1                        |
| 13620931  | 5.08                  | 5                        | 5.12                  | 5                        | 5.60                  | 6                        | 5.27                  | 5                        |
| 13620932  | 5.81                  | 6                        | 5.18                  | 5                        | 5.26                  | 5                        | 5.42                  | 5                        |
| 13620933  | 1.40                  | 1                        | 1.42                  | 1                        | 1.32                  | 1                        | 1.38                  | 1                        |
| 13620934  | 1.11                  | 1                        | 1.18                  | 1                        | 1.08                  | 1                        | 1.12                  | 1                        |
| 13620937  | 1.03                  | 1                        | 1.13                  | 1                        | 1.16                  | 1                        | 1.11                  | 1                        |
| 13620939  | 0.97                  | 1                        | 1.17                  | 1                        | 1.08                  | 1                        | 1.07                  | 1                        |
| 13620940  | 1.26                  | 1                        | 1.24                  | 1                        | 1.11                  | 1                        | 1.21                  | 1                        |
| 13620944  | 1.12                  | 1                        | 1.29                  | 1                        | 0.94                  | 1                        | 1.12                  | 1                        |
| 13620948  | 3.42                  | 3                        | 3.37                  | 3                        | 3.19                  | 3                        | 3.32                  | 3                        |
| 13620952  | 1.98                  | 2                        | 1.80                  | 2                        | 1.82                  | 2                        | 1.87                  | 2                        |
| 13620953  | 2.84                  | 3                        | 2.80                  | 3                        | 2.87                  | 3                        | 2.84                  | 3                        |
| 13620954  | 3.54                  | 4                        | 3.73                  | 4                        | 3.78                  | 4                        | 3.69                  | 4                        |
| 13620955  | 1.31                  | 1                        | 1.15                  | 1                        | 1.37                  | 1                        | 1.28                  | 1                        |
| 13620957  | 10.05                 | 10                       | 9.60                  | 10                       | 8.52                  | 9                        | 9.39                  | 9                        |
| 13620959  | 1.66                  | 2                        | 2.10                  | 2                        | 2.04                  | 2                        | 1.93                  | 2                        |
| 13620961  | 9.53                  | 10                       | 9.50                  | 10                       | 10.22                 | 10                       | 9.75                  | 10                       |

| Sample ID | Copy Number           |                          |                       |                          |                       |                          |                       |                          |
|-----------|-----------------------|--------------------------|-----------------------|--------------------------|-----------------------|--------------------------|-----------------------|--------------------------|
|           | r = 1                 |                          | r = 2                 |                          | r = 3                 |                          | Average               |                          |
|           | Ratio<br>(target/ref) | Estimated<br>Copy Number |
| 13620962  | 0.97                  | 1                        | 0.97                  | 1                        | 1.24                  | 1                        | 1.06                  | 1                        |
| 13620964  | 2.89                  | 3                        | 3.53                  | 4                        | 2.97                  | 3                        | 3.13                  | 3                        |
| 13620975  | 1.48                  | 1                        | 1.09                  | 1                        | 1.08                  | 1                        | 1.22                  | 1                        |
| 13620977  | 1.14                  | 1                        | 1.06                  | 1                        | 1.13                  | 1                        | 1.11                  | 1                        |
| 13620979  | 3.00                  | 3                        | 3.01                  | 3                        | 3.28                  | 3                        | 3.10                  | 3                        |
| 13620980  | 4.22                  | 4                        | 3.98                  | 4                        | 4.15                  | 4                        | 4.12                  | 4                        |
| 13620987  | 5.23                  | 5                        | 5.13                  | 5                        | 4.68                  | 5                        | 5.01                  | 5                        |
| 13620988  | 4.02                  | 4                        | 3.48                  | 3                        | 3.12                  | 3                        | 3.54                  | 4                        |
| 13620991  | 1.17                  | 1                        | 1.24                  | 1                        | 1.16                  | 1                        | 1.19                  | 1                        |
| 13621004  | 1.29                  | 1                        | 1.21                  | 1                        | 1.31                  | 1                        | 1.27                  | 1                        |
| 13621006  | 1.26                  | 1                        | 1.20                  | 1                        | 1.20                  | 1                        | 1.22                  | 1                        |
| 13621007  | 4.84                  | 5                        | 5.86                  | 6                        | 4.80                  | 5                        | 5.16                  | 5                        |
| 13621008  | 3.59                  | 4                        | 3.11                  | 3                        | 3.75                  | 4                        | 3.48                  | 3                        |
| 13621013  | 1.16                  | 1                        | 1.18                  | 1                        | 1.11                  | 1                        | 1.15                  | 1                        |
| 13621015  | 2.51                  | 3                        | 2.17                  | 2                        | 2.17                  | 2                        | 2.29                  | 2                        |
| 13621016  | 2.55                  | 3                        | 2.33                  | 2                        | 2.97                  | 3                        | 2.62                  | 3                        |
| 13621018  | 1.33                  | 1                        | 0.99                  | 1                        | 0.75                  | 1                        | 1.02                  | 1                        |
| 13630001  | 2.03                  | 2                        | 1.96                  | 2                        | 2.10                  | 2                        | 2.03                  | 2                        |
| 13630003  | 1.18                  | 1                        | 1.13                  | 1                        | 1.03                  | 1                        | 1.11                  | 1                        |

| Sample ID | Copy Number           |                          |                       |                          |                       |                          |                       |                          |
|-----------|-----------------------|--------------------------|-----------------------|--------------------------|-----------------------|--------------------------|-----------------------|--------------------------|
|           | r = 1                 |                          | r = 2                 |                          | r = 3                 |                          | Average               |                          |
|           | Ratio<br>(target/ref) | Estimated<br>Copy Number |
| 13630004  | 0.99                  | 1                        | 0.88                  | 1                        | 0.89                  | 1                        | 0.92                  | 1                        |
| 13630005  | 1.16                  | 1                        | 1.15                  | 1                        | 1.18                  | 1                        | 1.16                  | 1                        |
| 13630006  | 1.54                  | 2                        | 1.59                  | 2                        | 1.48                  | 1                        | 1.53                  | 2                        |
| 13630009  | 1.09                  | 1                        | 1.06                  | 1                        | 1.03                  | 1                        | 1.06                  | 1                        |
| 13630011  | 2.21                  | 2                        | 2.35                  | 2                        | 2.79                  | 3                        | 2.45                  | 2                        |
| 13630012  | 3.94                  | 4                        | 4.69                  | 5                        | 4.38                  | 4                        | 4.34                  | 4                        |
| 13630014  | 0.84                  | 1                        | 0.77                  | 1                        | 0.70                  | 1                        | 0.77                  | 1                        |
| 13630015  | 1.19                  | 1                        | 1.08                  | 1                        | 1.11                  | 1                        | 1.13                  | 1                        |
| 13630017  | 0.91                  | 1                        | 1.08                  | 1                        | 0.89                  | 1                        | 0.96                  | 1                        |
| 13630019  | 2.82                  | 3                        | 3.30                  | 3                        | 3.30                  | 3                        | 3.14                  | 3                        |
| 13630021  | 1.95                  | 2                        | 2.05                  | 2                        | 1.87                  | 2                        | 1.96                  | 2                        |
| 13630022  | 2.26                  | 2                        | 1.82                  | 2                        | 1.84                  | 2                        | 1.98                  | 2                        |
| 13630025  | 2.56                  | 3                        | 2.34                  | 2                        | 2.96                  | 3                        | 2.62                  | 3                        |
| 13630026  | 1.28                  | 1                        | 1.11                  | 1                        | 1.19                  | 1                        | 1.19                  | 1                        |
| 13630027  | 1.04                  | 1                        | 1.09                  | 1                        | 1.04                  | 1                        | 1.06                  | 1                        |
| 13630028  | 1.00                  | 1                        | 1.16                  | 1                        | 1.02                  | 1                        | 1.06                  | 1                        |
| 13630029  | 4.89                  | 5                        | 4.95                  | 5                        | 5.31                  | 5                        | 5.05                  | 5                        |
| 13630030  | 1.30                  | 1                        | 1.52                  | 2                        | 1.49                  | 1                        | 1.44                  | 1                        |
| 13630032  | 3.01                  | 3                        | 3.03                  | 3                        | 3.10                  | 3                        | 3.05                  | 3                        |

| Sample ID | Copy Number           |                          |                       |                          |                       |                          |                       |                          |
|-----------|-----------------------|--------------------------|-----------------------|--------------------------|-----------------------|--------------------------|-----------------------|--------------------------|
|           | r = 1                 |                          | r = 2                 |                          | r = 3                 |                          | Average               |                          |
|           | Ratio<br>(target/ref) | Estimated<br>Copy Number |
| 13630033  | 1.22                  | 1                        | 1.11                  | 1                        | 1.20                  | 1                        | 1.18                  | 1                        |
| 13630035  | 2.02                  | 2                        | 2.17                  | 2                        | 1.68                  | 2                        | 1.96                  | 2                        |
| 13630036  | 3.95                  | 4                        | 4.40                  | 4                        | 3.85                  | 4                        | 4.07                  | 4                        |
| 13630037  | 0.95                  | 1                        | 1.21                  | 1                        | 1.05                  | 1                        | 1.07                  | 1                        |
| 13630040  | 3.86                  | 4                        | 3.75                  | 4                        | 4.31                  | 4                        | 3.97                  | 4                        |
| 13630041  | 1.84                  | 2                        | 2.13                  | 2                        | 1.99                  | 2                        | 1.99                  | 2                        |
| 13630889  | 2.26                  | 2                        | 3.23                  | 3                        | 1.54                  | 2                        | 2.34                  | 2                        |
| 13640170  | 4.08                  | 4                        | 1.74                  | 2                        | 2.57                  | 3                        | 2.80                  | 3                        |
| 13640193  | 2.09                  | 2                        | 1.76                  | 2                        | 2.01                  | 2                        | 1.95                  | 2                        |
| 13640543  | 1.53                  | 2                        | 1.61                  | 2                        | 2.04                  | 2                        | 1.73                  | 2                        |
| 13640936  | 1.70                  | 2                        | 1.54                  | 2                        | 2.25                  | 2                        | 1.83                  | 2                        |
| 13650161  | 2.10                  | 2                        | 1.99                  | 2                        | 1.84                  | 2                        | 1.98                  | 2                        |
| 13650425  | 1.35                  | 1                        | 1.31                  | 1                        | 1.52                  | 2                        | 1.40                  | 1                        |
| 13650474  | 1.11                  | 1                        | 1.15                  | 1                        | 1.04                  | 1                        | 1.10                  | 1                        |
| 13660110  | 1.10                  | 1                        | 1.03                  | 1                        | 1.14                  | 1                        | 1.09                  | 1                        |
| 13660119  | 0.42                  | 0                        | 0.42                  | 0                        | 0.45                  | 0                        | 0.43                  | 0                        |
| 13660122  | 5.55                  | 6                        | 5.61                  | 6                        | 5.72                  | 6                        | 5.62                  | 6                        |
| 13660123  | 1.24                  | 1                        | 1.12                  | 1                        | 1.06                  | 1                        | 1.14                  | 1                        |
| 13660124  | 3.35                  | 3                        | 3.71                  | 4                        | 3.08                  | 3                        | 3.38                  | 3                        |

| Sample ID | Copy Number           |                          |                       |                          |                       |                          |                       |                          |
|-----------|-----------------------|--------------------------|-----------------------|--------------------------|-----------------------|--------------------------|-----------------------|--------------------------|
|           | r = 1                 |                          | r = 2                 |                          | r = 3                 |                          | Average               |                          |
|           | Ratio<br>(target/ref) | Estimated<br>Copy Number |
| 13660127  | 3.92                  | 4                        | 3.84                  | 4                        | 4.01                  | 4                        | 3.92                  | 4                        |
| 13660134  | 1.15                  | 1                        | 1.13                  | 1                        | 1.09                  | 1                        | 1.12                  | 1                        |
| 13660141  | 4.52                  | 5                        | 5.31                  | 5                        | 4.60                  | 5                        | 4.81                  | 5                        |
| 13660166  | 1.15                  | 1                        | 1.15                  | 1                        | 1.25                  | 1                        | 1.19                  | 1                        |
| 13660177  | 1.11                  | 1                        | 1.18                  | 1                        | 1.10                  | 1                        | 1.13                  | 1                        |
| 13660180  | 0.24                  | 0                        | 0.33                  | 0                        | 0.26                  | 0                        | 0.28                  | 0                        |
| 13660183  | 1.04                  | 1                        | 1.07                  | 1                        | 0.97                  | 1                        | 1.02                  | 1                        |
| 13660192  | 1.10                  | 1                        | 1.02                  | 1                        | 1.12                  | 1                        | 1.08                  | 1                        |
| 13660195  | 1.74                  | 2                        | 1.78                  | 2                        | 1.86                  | 2                        | 1.80                  | 2                        |
| 13660333  | 1.07                  | 1                        | 0.94                  | 1                        | 1.01                  | 1                        | 1.00                  | 1                        |
| 13660485  | 3.00                  | 3                        | 3.18                  | 3                        | 3.19                  | 3                        | 3.12                  | 3                        |
| 13660680  | 2.21                  | 2                        | 1.98                  | 2                        | 2.06                  | 2                        | 2.08                  | 2                        |
| 13660683  | 1.97                  | 2                        | 2.12                  | 2                        | 2.25                  | 2                        | 2.11                  | 2                        |
| 13660686  | 1.05                  | 1                        | 1.07                  | 1                        | 1.27                  | 1                        | 1.13                  | 1                        |
| 13660708  | 1.11                  | 1                        | 1.14                  | 1                        | 0.90                  | 1                        | 1.05                  | 1                        |
| 13660711  | 2.18                  | 2                        | 1.94                  | 2                        | 1.86                  | 2                        | 1.99                  | 2                        |
| 13660726  | 1.08                  | 1                        | 0.90                  | 1                        | 0.99                  | 1                        | 0.99                  | 1                        |
| 13660728  | 0.92                  | 1                        | 0.97                  | 1                        | 0.93                  | 1                        | 0.94                  | 1                        |
| 13660730  | 1.06                  | 1                        | 0.96                  | 1                        | 1.07                  | 1                        | 1.03                  | 1                        |



| Sample ID | Copy Number           |                          |                       |                          |                       |                          |                       |                          |
|-----------|-----------------------|--------------------------|-----------------------|--------------------------|-----------------------|--------------------------|-----------------------|--------------------------|
|           | r = 1                 |                          | r = 2                 |                          | r = 3                 |                          | Average               |                          |
|           | Ratio<br>(target/ref) | Estimated<br>Copy Number |
| 13660734  | 1.67                  | 2                        | 2.14                  | 2                        | 1.30                  | 1                        | 1.70                  | 2                        |
| 13670001  | 1.61                  | 2                        | 1.37                  | 1                        | 1.25                  | 1                        | 1.41                  | 1                        |
| 13670086  | 2.09                  | 2                        | 1.82                  | 2                        | 1.84                  | 2                        | 1.92                  | 2                        |
| 13670106  | 0.58                  | 1                        | 0.67                  | 1                        | 0.69                  | 1                        | 0.65                  | 1                        |
| 13670146  | 1.13                  | 1                        | 1.21                  | 1                        | 1.04                  | 1                        | 1.13                  | 1                        |
| 13670218  | 1.18                  | 1                        | 0.99                  | 1                        | 1.19                  | 1                        | 1.12                  | 1                        |
| 13670314  | 2.11                  | 2                        | 1.99                  | 2                        | 1.79                  | 2                        | 1.96                  | 2                        |
| 13670406  | 0.97                  | 1                        | 1.17                  | 1                        | 0.75                  | 1                        | 0.96                  | 1                        |
| 13670409  | 1.20                  | 1                        | 1.17                  | 1                        | 1.00                  | 1                        | 1.12                  | 1                        |
| 13670434  | 2.06                  | 2                        | 2.03                  | 2                        | 1.91                  | 2                        | 2.00                  | 2                        |
| 13670437  | 1.24                  | 1                        | 1.23                  | 1                        | 1.19                  | 1                        | 1.22                  | 1                        |
| 13670460  | 1.39                  | 1                        | 1.40                  | 1                        | 1.38                  | 1                        | 1.39                  | 1                        |
| 13670465  | 1.03                  | 1                        | 1.15                  | 1                        | 1.05                  | 1                        | 1.08                  | 1                        |
| 13670492  | 2.22                  | 2                        | 2.17                  | 2                        | 2.41                  | 2                        | 2.27                  | 2                        |
| 13680001  | 1.59                  | 2                        | 1.89                  | 2                        | 1.77                  | 2                        | 1.75                  | 2                        |
| 13680022  | 3.04                  | 3                        | 2.70                  | 3                        | 2.62                  | 3                        | 2.79                  | 3                        |
| 13680087  | 1.53                  | 2                        | 0.99                  | 1                        | 1.10                  | 1                        | 1.21                  | 1                        |
| 13680112  | 1.30                  | 1                        | 1.14                  | 1                        | 1.27                  | 1                        | 1.24                  | 1                        |
| 13680166  | 2.45                  | 2                        | 1.95                  | 2                        | 1.95                  | 2                        | 2.12                  | 2                        |

| Sample ID | Copy Number           |                          |                       |                          |                       |                          |                       |                          |
|-----------|-----------------------|--------------------------|-----------------------|--------------------------|-----------------------|--------------------------|-----------------------|--------------------------|
|           | r = 1                 |                          | r = 2                 |                          | r = 3                 |                          | Average               |                          |
|           | Ratio<br>(target/ref) | Estimated<br>Copy Number |
| 13680183  | 1.11                  | 1                        | 1.02                  | 1                        | 1.09                  | 1                        | 1.07                  | 1                        |
| 13680200  | 1.14                  | 1                        | 1.15                  | 1                        | 1.20                  | 1                        | 1.16                  | 1                        |
| 13680235  | 1.94                  | 2                        | 1.63                  | 2                        | 1.45                  | 1                        | 1.67                  | 2                        |
| 13680306  | 1.38                  | 1                        | 1.32                  | 1                        | 1.11                  | 1                        | 1.27                  | 1                        |
| 13680317  | 1.36                  | 1                        | 1.25                  | 1                        | 1.34                  | 1                        | 1.32                  | 1                        |
| 13680580  | 1.41                  | 1                        | 1.21                  | 1                        | 1.24                  | 1                        | 1.29                  | 1                        |
| 13680654  | 1.15                  | 1                        | 1.12                  | 1                        | 1.11                  | 1                        | 1.13                  | 1                        |
| 13690100  | 1.15                  | 1                        | 1.36                  | 1                        | 1.28                  | 1                        | 1.26                  | 1                        |
| 13690182  | 2.06                  | 2                        | 2.20                  | 2                        | 2.04                  | 2                        | 2.10                  | 2                        |
| 13690187  | 0.27                  | 0                        | 1.18                  | 1                        | 1.22                  | 1                        | 0.89                  | 1                        |
| 13690192  | 2.11                  | 2                        | 1.93                  | 2                        | 1.82                  | 2                        | 1.95                  | 2                        |
| 13690256  | 1.77                  | 2                        | 1.65                  | 2                        | 2.04                  | 2                        | 1.82                  | 2                        |
| 13690291  | 2.47                  | 2                        | 2.36                  | 2                        | 2.31                  | 2                        | 2.38                  | 2                        |
| 13700061  | 1.84                  | 2                        | 1.88                  | 2                        | 2.15                  | 2                        | 1.95                  | 2                        |
| 13700151  | 0.51                  | 1                        | 0.57                  | 1                        | 0.51                  | 1                        | 0.53                  | 1                        |
| 13700159  | 2.37                  | 2                        | 2.13                  | 2                        | 2.53                  | 3                        | 2.34                  | 2                        |
| 13700185  | 2.51                  | 3                        | 2.40                  | 2                        | 2.15                  | 2                        | 2.35                  | 2                        |
| 13700202  | 3.46                  | 3                        | 3.41                  | 3                        | 3.11                  | 3                        | 3.33                  | 3                        |
| 13710018  | 1.45                  | 1                        | 1.25                  | 1                        | 1.49                  | 1                        | 1.40                  | 1                        |

| Sample ID | Copy Number           |                          |                       |                          |                       |                          |                       |                          |
|-----------|-----------------------|--------------------------|-----------------------|--------------------------|-----------------------|--------------------------|-----------------------|--------------------------|
|           | r = 1                 |                          | r = 2                 |                          | r = 3                 |                          | Average               |                          |
|           | Ratio<br>(target/ref) | Estimated<br>Copy Number |
| 13710080  | 2.05                  | 2                        | 2.42                  | 2                        | 1.88                  | 2                        | 2.12                  | 2                        |
| 13710087  | 2.47                  | 2                        | 2.63                  | 3                        | 2.43                  | 2                        | 2.51                  | 3                        |
| 13710090  | 1.45                  | 1                        | 1.41                  | 1                        | 1.59                  | 2                        | 1.48                  | 1                        |
| 13710102  | 1.83                  | 2                        | 2.06                  | 2                        | 2.31                  | 2                        | 2.06                  | 2                        |
| 13710120  | 2.34                  | 2                        | 2.06                  | 2                        | 2.61                  | 3                        | 2.34                  | 2                        |
| 13710128  | 1.20                  | 1                        | 1.35                  | 1                        | 1.27                  | 1                        | 1.27                  | 1                        |
| 13710157  | 1.15                  | 1                        | 1.17                  | 1                        | 1.22                  | 1                        | 1.18                  | 1                        |
| 13710188  | 1.44                  | 1                        | 1.19                  | 1                        | 1.11                  | 1                        | 1.25                  | 1                        |
| 13710191  | 1.42                  | 1                        | 1.55                  | 2                        | 1.46                  | 1                        | 1.47                  | 1                        |
| 13710217  | 2.18                  | 2                        | 2.17                  | 2                        | 1.65                  | 2                        | 2.00                  | 2                        |
| 13710224  | 1.37                  | 1                        | 1.19                  | 1                        | 1.19                  | 1                        | 1.25                  | 1                        |
| 13710229  | 1.37                  | 1                        | 1.23                  | 1                        | 1.31                  | 1                        | 1.30                  | 1                        |
| 13710230  | 3.75                  | 4                        | 2.94                  | 3                        | 3.65                  | 4                        | 3.45                  | 3                        |
| 13710248  | 1.28                  | 1                        | 1.45                  | 1                        | 1.21                  | 1                        | 1.31                  | 1                        |
| 13710260  | 2.85                  | 3                        | 2.26                  | 2                        | 1.03                  | 1                        | 2.05                  | 2                        |
| 13750003  | 1.93                  | 2                        | 1.65                  | 2                        | 1.83                  | 2                        | 1.81                  | 2                        |
| 13760001  | 3.05                  | 3                        | 2.79                  | 3                        | 2.77                  | 3                        | 2.87                  | 3                        |
| 13760009  | 1.28                  | 1                        | 1.25                  | 1                        | 1.09                  | 1                        | 1.20                  | 1                        |
| 13770002  | 2.22                  | 2                        | 2.63                  | 3                        | 2.37                  | 2                        | 2.41                  | 2                        |

| Sample ID | Copy Number           |                          |                       |                          |                       |                          |                       |                          |
|-----------|-----------------------|--------------------------|-----------------------|--------------------------|-----------------------|--------------------------|-----------------------|--------------------------|
|           | r = 1                 |                          | r = 2                 |                          | r = 3                 |                          | Average               |                          |
|           | Ratio<br>(target/ref) | Estimated<br>Copy Number |
| 13770008  | 2.91                  | 3                        | 2.88                  | 3                        | 2.89                  | 3                        | 2.89                  | 3                        |
| 13770009  | 2.45                  | 2                        | 2.69                  | 3                        | 2.22                  | 2                        | 2.45                  | 2                        |
| 13780005  | 2.84                  | 3                        | 2.43                  | 2                        | 2.39                  | 2                        | 2.55                  | 3                        |
| 13780006  | 4.26                  | 4                        | 6.37                  | 6                        | 5.83                  | 6                        | 5.49                  | 5                        |
| 13800003  | 3.99                  | 4                        | 4.15                  | 4                        | 3.95                  | 4                        | 4.03                  | 4                        |
| 13800010  | 5.86                  | 6                        | 5.21                  | 5                        | 5.26                  | 5                        | 5.44                  | 5                        |
| 13800011  | 2.33                  | 2                        | 2.24                  | 2                        | 1.95                  | 2                        | 2.17                  | 2                        |
| 13800012  | 1.48                  | 1                        | 1.42                  | 1                        | 1.59                  | 2                        | 1.49                  | 1                        |
| 13800051  | 1.00                  | 1                        | 1.16                  | 1                        | 1.13                  | 1                        | 1.10                  | 1                        |
| 13810006  | 1.05                  | 1                        | 1.18                  | 1                        | 0.81                  | 1                        | 1.01                  | 1                        |
| 13810007  | 0.75                  | 1                        | 0.70                  | 1                        | 0.81                  | 1                        | 0.75                  | 1                        |
| 13810009  | 1.66                  | 2                        | 1.98                  | 2                        | 1.70                  | 2                        | 1.78                  | 2                        |
| 13820002  | 1.46                  | 1                        | 1.49                  | 1                        | 1.64                  | 2                        | 1.53                  | 2                        |
| 13820004  | 1.54                  | 2                        | 1.04                  | 1                        | 1.52                  | 2                        | 1.36                  | 1                        |
| 13820005  | 2.45                  | 2                        | 2.33                  | 2                        | 2.46                  | 2                        | 2.41                  | 2                        |
| 13820008  | 1.37                  | 1                        | 1.23                  | 1                        | 1.26                  | 1                        | 1.29                  | 1                        |
| 14010013  | 1.43                  | 1                        | 1.12                  | 1                        | 1.13                  | 1                        | 1.23                  | 1                        |
| 14010017  | 1.48                  | 1                        | 1.42                  | 1                        | 1.33                  | 1                        | 1.41                  | 1                        |
| 14010018  | 2.10                  | 2                        | 1.90                  | 2                        | 1.66                  | 2                        | 1.89                  | 2                        |

| Sample ID | Copy Number           |                          |                       |                          |                       |                          |                       |                          |
|-----------|-----------------------|--------------------------|-----------------------|--------------------------|-----------------------|--------------------------|-----------------------|--------------------------|
|           | r = 1                 |                          | r = 2                 |                          | r = 3                 |                          | Average               |                          |
|           | Ratio<br>(target/ref) | Estimated<br>Copy Number |
| 14010024  | 9.16                  | 9                        | 7.21                  | 7                        | 6.94                  | 7                        | 7.77                  | 8                        |
| 14010025  | 5.98                  | 6                        | 4.91                  | 5                        | 5.77                  | 6                        | 5.56                  | 6                        |
| 14010026  | 1.74                  | 2                        | 2.06                  | 2                        | 1.96                  | 2                        | 1.92                  | 2                        |
| 14010030  | 2.32                  | 2                        | 2.46                  | 2                        | 2.36                  | 2                        | 2.38                  | 2                        |
| 14010031  | 2.47                  | 2                        | 1.73                  | 2                        | 1.86                  | 2                        | 2.02                  | 2                        |
| 14010032  | 0.97                  | 1                        | 1.05                  | 1                        | 1.01                  | 1                        | 1.01                  | 1                        |
| 14010033  | 2.38                  | 2                        | 2.87                  | 3                        | 2.76                  | 3                        | 2.67                  | 3                        |
| 14010034  | 4.03                  | 4                        | 3.82                  | 4                        | 3.85                  | 4                        | 3.90                  | 4                        |
| 14010036  | 5.28                  | 5                        | 6.35                  | 6                        | 5.42                  | 5                        | 5.68                  | 6                        |
| 14010043  | 3.43                  | 3                        | 3.13                  | 3                        | 3.17                  | 3                        | 3.24                  | 3                        |
| 14010044  | 1.48                  | 1                        | 1.55                  | 2                        | 1.72                  | 2                        | 1.58                  | 2                        |
| 14010045  | 2.11                  | 2                        | 1.87                  | 2                        | 2.00                  | 2                        | 1.99                  | 2                        |
| 14010046  | 1.36                  | 1                        | 4.35                  | 4                        | 4.47                  | 4                        | 3.39                  | 3                        |
| 14010048  | 2.83                  | 3                        | 2.82                  | 3                        | 1.79                  | 2                        | 2.48                  | 2                        |
| 14010053  | 5.52                  | 6                        | 5.88                  | 6                        | 6.99                  | 7                        | 6.13                  | 6                        |
| 14010057  | 3.77                  | 4                        | 4.25                  | 4                        | 4.47                  | 4                        | 4.16                  | 4                        |
| 14010059  | 1.98                  | 2                        | 1.89                  | 2                        | 1.85                  | 2                        | 1.91                  | 2                        |
| 14010065  | 11.06                 | 11                       | 9.60                  | 10                       | 8.14                  | 8                        | 9.60                  | 10                       |
| 14010070  | 6.08                  | 6                        | 5.71                  | 6                        | 5.49                  | 5                        | 5.76                  | 6                        |

| Sample ID | Copy Number           |                          |                       |                          |                       |                          |                       |                          |
|-----------|-----------------------|--------------------------|-----------------------|--------------------------|-----------------------|--------------------------|-----------------------|--------------------------|
|           | r = 1                 |                          | r = 2                 |                          | r = 3                 |                          | Average               |                          |
|           | Ratio<br>(target/ref) | Estimated<br>Copy Number |
| 14010075  | 1.37                  | 1                        | 1.24                  | 1                        | 1.37                  | 1                        | 1.32                  | 1                        |
| 14010081  | 1.55                  | 2                        | 1.53                  | 2                        | 1.44                  | 1                        | 1.51                  | 2                        |
| 14010084  | 1.40                  | 1                        | 1.68                  | 2                        | 1.33                  | 1                        | 1.47                  | 1                        |
| 14010086  | 2.79                  | 3                        | 2.94                  | 3                        | 2.37                  | 2                        | 2.70                  | 3                        |
| 14010087  | 8.26                  | 8                        | 8.00                  | 8                        | 7.37                  | 7                        | 7.87                  | 8                        |
| 14010089  | 4.31                  | 4                        | 4.56                  | 5                        | 4.69                  | 5                        | 4.52                  | 5                        |
| 14010091  | 1.32                  | 1                        | 1.21                  | 1                        | 1.26                  | 1                        | 1.26                  | 1                        |
| 14010092  | 6.21                  | 6                        | 4.59                  | 5                        | 3.70                  | 4                        | 4.84                  | 5                        |
| 14010094  | 18.17                 | 18                       | 16.10                 | 16                       | 16.50                 | 17                       | 16.92                 | 17                       |
| 14010099  | 3.72                  | 4                        | 3.56                  | 4                        | 3.09                  | 3                        | 3.46                  | 3                        |
| 14010107  | 9.35                  | 9                        | 7.57                  | 8                        | 8.45                  | 8                        | 8.46                  | 8                        |
| 14010108  | 8.76                  | 9                        | 9.05                  | 9                        | 8.20                  | 8                        | 8.67                  | 9                        |
| 14010114  | 1.31                  | 1                        | 1.10                  | 1                        | 1.19                  | 1                        | 1.20                  | 1                        |
| 14010117  | 1.91                  | 2                        | 1.83                  | 2                        | 1.96                  | 2                        | 1.90                  | 2                        |
| 14010123  | 1.08                  | 1                        | 1.17                  | 1                        | 1.18                  | 1                        | 1.15                  | 1                        |
| 14010126  | 12.03                 | 12                       | 12.21                 | 12                       | 10.42                 | 10                       | 11.55                 | 12                       |
| 14010127  | 2.71                  | 3                        | 2.92                  | 3                        | 2.82                  | 3                        | 2.82                  | 3                        |
| 14010128  | 7.34                  | 7                        | 7.07                  | 7                        | 7.10                  | 7                        | 7.17                  | 7                        |
| 14010130  | 1.17                  | 1                        | 1.39                  | 1                        | 1.32                  | 1                        | 1.29                  | 1                        |

| Sample ID | Copy Number           |                          |                       |                          |                       |                          |                       |                          |
|-----------|-----------------------|--------------------------|-----------------------|--------------------------|-----------------------|--------------------------|-----------------------|--------------------------|
|           | r = 1                 |                          | r = 2                 |                          | r = 3                 |                          | Average               |                          |
|           | Ratio<br>(target/ref) | Estimated<br>Copy Number |
| 14010135  | 1.86                  | 2                        | 1.95                  | 2                        | 1.99                  | 2                        | 1.93                  | 2                        |
| 14010136  | 3.71                  | 4                        | 2.89                  | 3                        | 3.41                  | 3                        | 3.34                  | 3                        |
| 14010139  | 1.31                  | 1                        | 1.27                  | 1                        | 1.33                  | 1                        | 1.30                  | 1                        |
| 14010140  | 3.64                  | 4                        | 3.97                  | 4                        | 4.18                  | 4                        | 3.93                  | 4                        |
| 14010141  | 4.16                  | 4                        | 4.25                  | 4                        | 4.40                  | 4                        | 4.27                  | 4                        |
| 14010142  | 9.25                  | 9                        | 9.22                  | 9                        | 9.45                  | 9                        | 9.31                  | 9                        |
| 14010145  | 1.37                  | 1                        | 1.21                  | 1                        | 1.04                  | 1                        | 1.21                  | 1                        |
| 14010147  | 1.26                  | 1                        | 1.17                  | 1                        | 1.13                  | 1                        | 1.18                  | 1                        |
| 14010151  | 2.20                  | 2                        | 2.00                  | 2                        | 2.12                  | 2                        | 2.11                  | 2                        |
| 14010152  | 1.27                  | 1                        | 1.18                  | 1                        | 1.13                  | 1                        | 1.19                  | 1                        |
| 14010155  | 0.92                  | 1                        | 0.91                  | 1                        | 0.79                  | 1                        | 0.88                  | 1                        |
| 14010156  | 3.71                  | 4                        | 3.53                  | 4                        | 3.44                  | 3                        | 3.56                  | 4                        |
| 14010160  | 1.12                  | 1                        | 1.22                  | 1                        | 1.29                  | 1                        | 1.21                  | 1                        |
| 14010163  | 0.99                  | 1                        | 1.08                  | 1                        | 1.11                  | 1                        | 1.06                  | 1                        |
| 14010165  | 1.09                  | 1                        | 1.10                  | 1                        | 0.92                  | 1                        | 1.04                  | 1                        |
| 14010166  | 5.70                  | 6                        | 5.34                  | 5                        | 5.23                  | 5                        | 5.42                  | 5                        |
| 14010167  | 4.48                  | 4                        | 4.10                  | 4                        | 4.04                  | 4                        | 4.21                  | 4                        |
| 14010168  | 2.40                  | 2                        | 2.13                  | 2                        | 2.21                  | 2                        | 2.25                  | 2                        |
| 14010169  | 1.03                  | 1                        | 1.06                  | 1                        | 1.07                  | 1                        | 1.05                  | 1                        |

| Sample ID | Copy Number           |                          |                       |                          |                       |                          |                       |                          |
|-----------|-----------------------|--------------------------|-----------------------|--------------------------|-----------------------|--------------------------|-----------------------|--------------------------|
|           | r = 1                 |                          | r = 2                 |                          | r = 3                 |                          | Average               |                          |
|           | Ratio<br>(target/ref) | Estimated<br>Copy Number |
| 14010170  | 2.07                  | 2                        | 2.18                  | 2                        | 2.06                  | 2                        | 2.10                  | 2                        |
| 14010177  | 1.22                  | 1                        | 1.18                  | 1                        | 1.14                  | 1                        | 1.18                  | 1                        |
| 14010181  | 3.22                  | 3                        | 3.03                  | 3                        | 2.89                  | 3                        | 3.05                  | 3                        |
| 14010182  | 4.90                  | 5                        | 4.26                  | 4                        | 4.31                  | 4                        | 4.49                  | 4                        |
| 14010183  | 4.62                  | 5                        | 4.55                  | 5                        | 4.35                  | 4                        | 4.51                  | 5                        |
| 14010187  | 2.76                  | 3                        | 2.59                  | 3                        | 2.65                  | 3                        | 2.67                  | 3                        |
| 14010191  | 1.35                  | 1                        | 1.37                  | 1                        | 1.33                  | 1                        | 1.35                  | 1                        |
| 14010192  | 1.93                  | 2                        | 2.13                  | 2                        | 2.08                  | 2                        | 2.05                  | 2                        |
| 14010193  | 3.79                  | 4                        | 3.68                  | 4                        | 3.93                  | 4                        | 3.80                  | 4                        |
| 14010194  | 1.15                  | 1                        | 1.31                  | 1                        | 1.23                  | 1                        | 1.23                  | 1                        |
| 14010195  | 4.70                  | 5                        | 5.38                  | 5                        | 5.56                  | 6                        | 5.21                  | 5                        |
| 14010197  | 3.31                  | 3                        | 3.51                  | 4                        | 3.59                  | 4                        | 3.47                  | 3                        |
| 14010199  | 1.56                  | 2                        | 1.44                  | 1                        | 1.43                  | 1                        | 1.47                  | 1                        |
| 14010201  | 6.45                  | 6                        | 6.75                  | 7                        | 6.06                  | 6                        | 6.42                  | 6                        |
| 14010205  | 4.72                  | 5                        | 4.79                  | 5                        | 4.13                  | 4                        | 4.55                  | 5                        |
| 14010207  | 1.21                  | 1                        | 1.19                  | 1                        | 1.10                  | 1                        | 1.17                  | 1                        |
| 14010209  | 1.38                  | 1                        | 1.47                  | 1                        | 1.38                  | 1                        | 1.41                  | 1                        |
| 14010212  | 1.47                  | 1                        | 1.43                  | 1                        | 1.43                  | 1                        | 1.44                  | 1                        |
| 14010217  | 2.75                  | 3                        | 2.49                  | 2                        | 2.43                  | 2                        | 2.56                  | 3                        |



| Sample ID | Copy Number           |                          |                       |                          |                       |                          |                       |                          |
|-----------|-----------------------|--------------------------|-----------------------|--------------------------|-----------------------|--------------------------|-----------------------|--------------------------|
|           | r = 1                 |                          | r = 2                 |                          | r = 3                 |                          | Average               |                          |
|           | Ratio<br>(target/ref) | Estimated<br>Copy Number |
| 14010220  | 6.76                  | 7                        | 6.63                  | 7                        | 6.18                  | 6                        | 6.52                  | 7                        |
| 14010221  | 2.33                  | 2                        | 3.01                  | 3                        | 2.91                  | 3                        | 2.75                  | 3                        |
| 14010225  | 1.12                  | 1                        | 1.14                  | 1                        | 1.06                  | 1                        | 1.11                  | 1                        |
| 14010229  | 3.95                  | 4                        | 4.16                  | 4                        | 4.02                  | 4                        | 4.04                  | 4                        |
| 14010230  | 5.53                  | 6                        | 10.28                 | 10                       | 7.06                  | 7                        | 7.62                  | 8                        |
| 14010237  | 1.27                  | 1                        | 1.43                  | 1                        | 1.63                  | 2                        | 1.44                  | 1                        |
| 14010242  | 1.30                  | 1                        | 1.56                  | 2                        | 1.39                  | 1                        | 1.42                  | 1                        |
| 14010246  | 2.33                  | 2                        | 1.96                  | 2                        | 2.16                  | 2                        | 2.15                  | 2                        |
| 14010247  | 2.18                  | 2                        | 2.09                  | 2                        | 2.31                  | 2                        | 2.19                  | 2                        |
| 14010250  | 1.34                  | 1                        | 1.25                  | 1                        | 1.35                  | 1                        | 1.31                  | 1                        |
| 14010251  | 3.98                  | 4                        | 3.35                  | 3                        | 3.05                  | 3                        | 3.46                  | 3                        |
| 14010252  | 1.56                  | 2                        | 1.64                  | 2                        | 1.76                  | 2                        | 1.65                  | 2                        |
| 14010253  | 7.01                  | 7                        | 5.44                  | 5                        | 5.17                  | 5                        | 5.87                  | 6                        |
| 14010258  | 3.46                  | 3                        | 3.07                  | 3                        | 2.62                  | 3                        | 3.05                  | 3                        |
| 14010259  | 3.41                  | 3                        | 4.03                  | 4                        | 12.94                 | 13                       | 6.79                  | 7                        |
| 14010265  | 3.33                  | 3                        | 3.44                  | 3                        | 3.86                  | 4                        | 3.54                  | 4                        |
| 14010267  | 5.79                  | 6                        | 5.51                  | 6                        | 4.70                  | 5                        | 5.33                  | 5                        |
| 14010268  | 4.38                  | 4                        | 5.19                  | 5                        | 5.49                  | 5                        | 5.02                  | 5                        |
| 14010271  | 11.50                 | 12                       | 10.87                 | 11                       | 12.28                 | 12                       | 11.55                 | 12                       |

| Sample ID | Copy Number           |                          |                       |                          |                       |                          |                       |                          |
|-----------|-----------------------|--------------------------|-----------------------|--------------------------|-----------------------|--------------------------|-----------------------|--------------------------|
|           | r = 1                 |                          | r = 2                 |                          | r = 3                 |                          | Average               |                          |
|           | Ratio<br>(target/ref) | Estimated<br>Copy Number |
| 14010272  | 10.36                 | 10                       | 9.24                  | 9                        | 9.78                  | 10                       | 9.79                  | 10                       |
| 14010273  | 4.99                  | 5                        | 4.18                  | 4                        | 3.44                  | 3                        | 4.20                  | 4                        |
| 14010274  | 1.14                  | 1                        | 1.12                  | 1                        | 1.15                  | 1                        | 1.14                  | 1                        |
| 14010275  | 2.54                  | 3                        | 3.06                  | 3                        | 2.50                  | 2                        | 2.70                  | 3                        |
| 14010276  | 4.72                  | 5                        | 4.68                  | 5                        | 4.35                  | 4                        | 4.58                  | 5                        |
| 14010277  | 5.79                  | 6                        | 6.47                  | 6                        | 6.80                  | 7                        | 6.36                  | 6                        |
| 14010278  | 6.59                  | 7                        | 7.97                  | 8                        | 8.09                  | 8                        | 7.55                  | 8                        |
| 14010279  | 5.41                  | 5                        | 4.96                  | 5                        | 4.50                  | 5                        | 4.96                  | 5                        |
| 14010282  | 4.58                  | 5                        | 4.11                  | 4                        | 4.18                  | 4                        | 4.29                  | 4                        |
| 14010283  | 2.53                  | 3                        | 2.68                  | 3                        | 1.66                  | 2                        | 2.29                  | 2                        |
| 14010285  | 2.72                  | 3                        | 2.56                  | 3                        | 2.49                  | 2                        | 2.59                  | 3                        |
| 14010287  | 1.63                  | 2                        | 1.10                  | 1                        | 1.49                  | 1                        | 1.41                  | 1                        |
| 14010289  | 1.15                  | 1                        | 1.15                  | 1                        | 0.77                  | 1                        | 1.02                  | 1                        |
| 14010291  | 0.96                  | 1                        | 0.63                  | 1                        | 1.01                  | 1                        | 0.87                  | 1                        |
| 14010292  | 1.97                  | 2                        | 2.10                  | 2                        | 1.97                  | 2                        | 2.02                  | 2                        |
| 14010293  | 0.95                  | 1                        | 0.76                  | 1                        | 1.02                  | 1                        | 0.91                  | 1                        |
| 14010294  | 0.93                  | 1                        | 0.87                  | 1                        | 1.09                  | 1                        | 0.96                  | 1                        |
| 14010296  | 1.14                  | 1                        | 1.01                  | 1                        | 1.00                  | 1                        | 1.05                  | 1                        |
| 14010297  | 0.80                  | 1                        | 1.37                  | 1                        | 1.25                  | 1                        | 1.14                  | 1                        |

| Sample ID | Copy Number           |                          |                       |                          |                       |                          |                       |                          |
|-----------|-----------------------|--------------------------|-----------------------|--------------------------|-----------------------|--------------------------|-----------------------|--------------------------|
|           | r = 1                 |                          | r = 2                 |                          | r = 3                 |                          | Average               |                          |
|           | Ratio<br>(target/ref) | Estimated<br>Copy Number |
| 14010299  | 1.54                  | 2                        | 1.60                  | 2                        | 1.60                  | 2                        | 1.58                  | 2                        |
| 14010305  | 1.32                  | 1                        | 1.37                  | 1                        | 1.47                  | 1                        | 1.39                  | 1                        |
| 14010311  | 3.40                  | 3                        | 3.06                  | 3                        | 2.74                  | 3                        | 3.07                  | 3                        |
| 14010314  | 3.30                  | 3                        | 3.42                  | 3                        | 3.30                  | 3                        | 3.34                  | 3                        |
| 14010319  | 2.22                  | 2                        | 3.27                  | 3                        | 3.59                  | 4                        | 3.03                  | 3                        |
| 14010320  | 7.55                  | 8                        | 8.04                  | 8                        | 8.18                  | 8                        | 7.92                  | 8                        |
| 14010321  | 2.01                  | 2                        | 2.12                  | 2                        | 2.22                  | 2                        | 2.12                  | 2                        |
| 14010323  | 1.33                  | 1                        | 1.38                  | 1                        | 1.43                  | 1                        | 1.38                  | 1                        |
| 14010341  | 6.53                  | 7                        | 6.19                  | 6                        | 6.68                  | 7                        | 6.47                  | 6                        |
| 14010345  | 5.53                  | 6                        | 5.33                  | 5                        | 5.53                  | 6                        | 5.46                  | 5                        |
| 14010347  | 22.50                 | 23                       | 21.53                 | 22                       | 22.31                 | 22                       | 22.11                 | 22                       |
| 14010350  | 5.09                  | 5                        | 5.68                  | 6                        | 5.73                  | 6                        | 5.50                  | 5                        |
| 14010351  | 5.25                  | 5                        | 3.81                  | 4                        | 4.32                  | 4                        | 4.46                  | 4                        |
| 14010354  | 1.89                  | 2                        | 1.70                  | 2                        | 1.68                  | 2                        | 1.76                  | 2                        |
| 14010355  | 2.06                  | 2                        | 2.05                  | 2                        | 1.83                  | 2                        | 1.98                  | 2                        |
| 14010357  | 4.39                  | 4                        | 4.22                  | 4                        | 4.13                  | 4                        | 4.25                  | 4                        |
| 14010363  | 1.38                  | 1                        | 1.38                  | 1                        | 1.45                  | 1                        | 1.41                  | 1                        |
| 14010368  | 1.20                  | 1                        | 1.07                  | 1                        | 1.07                  | 1                        | 1.11                  | 1                        |
| 14010369  | 4.11                  | 4                        | 4.11                  | 4                        | 4.29                  | 4                        | 4.17                  | 4                        |

| Sample ID | Copy Number           |                          |                       |                          |                       |                          |                       |                          |
|-----------|-----------------------|--------------------------|-----------------------|--------------------------|-----------------------|--------------------------|-----------------------|--------------------------|
|           | r = 1                 |                          | r = 2                 |                          | r = 3                 |                          | Average               |                          |
|           | Ratio<br>(target/ref) | Estimated<br>Copy Number |
| 14010370  | 6.53                  | 7                        | 6.41                  | 6                        | 6.36                  | 6                        | 6.43                  | 6                        |
| 14010375  | 1.30                  | 1                        | 1.35                  | 1                        | 1.57                  | 2                        | 1.41                  | 1                        |
| 14010376  | 3.19                  | 3                        | 2.97                  | 3                        | 3.42                  | 3                        | 3.19                  | 3                        |
| 14010377  | 1.09                  | 1                        | 1.03                  | 1                        | 0.99                  | 1                        | 1.04                  | 1                        |
| 14010378  | 0.96                  | 1                        | 1.15                  | 1                        | 1.15                  | 1                        | 1.09                  | 1                        |
| 14010380  | 3.79                  | 4                        | 3.75                  | 4                        | 3.83                  | 4                        | 3.79                  | 4                        |
| 14010382  | 4.99                  | 5                        | 4.75                  | 5                        | 6.32                  | 6                        | 5.35                  | 5                        |
| 14010388  | 0.05                  | 0                        | 0.07                  | 0                        | 0.06                  | 0                        | 0.06                  | 0                        |
| 14010392  | 1.74                  | 2                        | 1.85                  | 2                        | 2.03                  | 2                        | 1.87                  | 2                        |
| 14010393  | 1.08                  | 1                        | 1.23                  | 1                        | 1.34                  | 1                        | 1.22                  | 1                        |
| 14010394  | 1.00                  | 1                        | 1.00                  | 1                        | 0.11                  | 0                        | 0.71                  | 1                        |
| 14010395  | 1.34                  | 1                        | 0.98                  | 1                        | 0.27                  | 0                        | 0.86                  | 1                        |
| 14010399  | 1.79                  | 2                        | 2.23                  | 2                        | 1.83                  | 2                        | 1.95                  | 2                        |
| 14010400  | 1.84                  | 2                        | 1.97                  | 2                        | 1.96                  | 2                        | 1.92                  | 2                        |
| 14010401  | 1.03                  | 1                        | 1.07                  | 1                        | 1.47                  | 1                        | 1.19                  | 1                        |
| 14010404  | 1.99                  | 2                        | 2.01                  | 2                        | 2.33                  | 2                        | 2.11                  | 2                        |
| 14010406  | 5.73                  | 6                        | 8.77                  | 9                        | 5.57                  | 6                        | 6.69                  | 7                        |
| 14010407  | 0.96                  | 1                        | 1.29                  | 1                        | 1.17                  | 1                        | 1.14                  | 1                        |
| 14010411  | 0.95                  | 1                        | 1.02                  | 1                        | 0.91                  | 1                        | 0.96                  | 1                        |

| Sample ID | Copy Number           |                          |                       |                          |                       |                          |                       |                          |
|-----------|-----------------------|--------------------------|-----------------------|--------------------------|-----------------------|--------------------------|-----------------------|--------------------------|
|           | r = 1                 |                          | r = 2                 |                          | r = 3                 |                          | Average               |                          |
|           | Ratio<br>(target/ref) | Estimated<br>Copy Number |
| 14010412  | 2.43                  | 2                        | 3.22                  | 3                        | 2.20                  | 2                        | 2.62                  | 3                        |
| 14010413  | 3.00                  | 3                        | 2.79                  | 3                        | 2.87                  | 3                        | 2.89                  | 3                        |
| 14010414  | 2.42                  | 2                        | 2.81                  | 3                        | 3.14                  | 3                        | 2.79                  | 3                        |
| 14010418  | 1.07                  | 1                        | 1.25                  | 1                        | 1.42                  | 1                        | 1.25                  | 1                        |
| 14010425  | 1.91                  | 2                        | 1.98                  | 2                        | 1.94                  | 2                        | 1.94                  | 2                        |
| 14010427  | 0.67                  | 1                        | 0.68                  | 1                        | 0.68                  | 1                        | 0.68                  | 1                        |
| 14010430  | 1.34                  | 1                        | 0.94                  | 1                        | 0.98                  | 1                        | 1.08                  | 1                        |
| 14010431  | 2.45                  | 2                        | 2.06                  | 2                        | 1.95                  | 2                        | 2.15                  | 2                        |
| 14010432  | 7.51                  | 8                        | 8.13                  | 8                        | 6.27                  | 6                        | 7.30                  | 7                        |
| 14010437  | 3.83                  | 4                        | 4.02                  | 4                        | 3.52                  | 4                        | 3.79                  | 4                        |
| 14010438  | 2.00                  | 2                        | 1.75                  | 2                        | 1.67                  | 2                        | 1.81                  | 2                        |
| 14010441  | 16.08                 | 16                       | 13.35                 | 13                       | 12.49                 | 12                       | 13.97                 | 14                       |
| 14010444  | 1.10                  | 1                        | 0.93                  | 1                        | 0.80                  | 1                        | 0.94                  | 1                        |
| 14010445  | 1.63                  | 2                        | 1.83                  | 2                        | 1.68                  | 2                        | 1.72                  | 2                        |
| 14010450  | 1.11                  | 1                        | 0.89                  | 1                        | 0.91                  | 1                        | 0.97                  | 1                        |
| 14010452  | 4.82                  | 5                        | 4.09                  | 4                        | 4.73                  | 5                        | 4.55                  | 5                        |
| 14010455  | 2.12                  | 2                        | 2.36                  | 2                        | 2.22                  | 2                        | 2.23                  | 2                        |
| 14010458  | 1.09                  | 1                        | 1.14                  | 1                        | 1.12                  | 1                        | 1.12                  | 1                        |
| 14010460  | 0.86                  | 1                        | 0.92                  | 1                        | 0.92                  | 1                        | 0.90                  | 1                        |

| Sample ID | Copy Number           |                          |                       |                          |                       |                          |                       |                          |
|-----------|-----------------------|--------------------------|-----------------------|--------------------------|-----------------------|--------------------------|-----------------------|--------------------------|
|           | r = 1                 |                          | r = 2                 |                          | r = 3                 |                          | Average               |                          |
|           | Ratio<br>(target/ref) | Estimated<br>Copy Number |
| 14010462  | 5.94                  | 6                        | 7.08                  | 7                        | 7.16                  | 7                        | 6.73                  | 7                        |
| 14010463  | 5.47                  | 5                        | 5.59                  | 6                        | 6.43                  | 6                        | 5.83                  | 6                        |
| 14010465  | 9.50                  | 9                        | 10.37                 | 10                       | 10.85                 | 11                       | 10.24                 | 10                       |
| 14010473  | 1.03                  | 1                        | 1.07                  | 1                        | 1.03                  | 1                        | 1.04                  | 1                        |
| 14010477  | 1.52                  | 2                        | 1.48                  | 1                        | 1.47                  | 1                        | 1.49                  | 1                        |
| 14010478  | 1.20                  | 1                        | 1.26                  | 1                        | 1.18                  | 1                        | 1.21                  | 1                        |
| 14010480  | 1.16                  | 1                        | 1.11                  | 1                        | 1.08                  | 1                        | 1.12                  | 1                        |
| 14010484  | 0.03                  | 0                        | 0.04                  | 0                        | 0.02                  | 0                        | 0.03                  | 0                        |
| 14010491  | 1.83                  | 2                        | 1.75                  | 2                        | 1.62                  | 2                        | 1.73                  | 2                        |
| 14010492  | 1.63                  | 2                        | 1.90                  | 2                        | 1.69                  | 2                        | 1.74                  | 2                        |
| 14010493  | 2.78                  | 3                        | 2.69                  | 3                        | 3.74                  | 4                        | 3.07                  | 3                        |
| 14010500  | 2.03                  | 2                        | 2.15                  | 2                        | 2.24                  | 2                        | 2.14                  | 2                        |
| 14010503  | 3.09                  | 3                        | 3.30                  | 3                        | 3.34                  | 3                        | 3.24                  | 3                        |
| 14010504  | 2.75                  | 3                        | 2.95                  | 3                        | 3.26                  | 3                        | 2.98                  | 3                        |
| 14010505  | 0.88                  | 1                        | 0.84                  | 1                        | 1.17                  | 1                        | 0.97                  | 1                        |
| 14010508  | 3.67                  | 4                        | 3.42                  | 3                        | 3.39                  | 3                        | 3.50                  | 3                        |
| 14010509  | 3.20                  | 3                        | 2.61                  | 3                        | 2.95                  | 3                        | 2.92                  | 3                        |
| 14010510  | 2.05                  | 2                        | 2.25                  | 2                        | 2.03                  | 2                        | 2.11                  | 2                        |
| 14010516  | 2.70                  | 3                        | 3.67                  | 4                        | 3.61                  | 4                        | 3.33                  | 3                        |

| Sample ID | Copy Number           |                          |                       |                          |                       |                          |                       |                          |
|-----------|-----------------------|--------------------------|-----------------------|--------------------------|-----------------------|--------------------------|-----------------------|--------------------------|
|           | r = 1                 |                          | r = 2                 |                          | r = 3                 |                          | Average               |                          |
|           | Ratio<br>(target/ref) | Estimated<br>Copy Number |
| 14010519  | 5.94                  | 6                        | 5.24                  | 5                        | 5.32                  | 5                        | 5.50                  | 5                        |
| 14010520  | 5.84                  | 6                        | 4.67                  | 5                        | 4.62                  | 5                        | 5.04                  | 5                        |
| 14010521  | 1.20                  | 1                        | 1.31                  | 1                        | 1.19                  | 1                        | 1.23                  | 1                        |
| 14010522  | 0.65                  | 1                        | 1.04                  | 1                        | 1.15                  | 1                        | 0.94                  | 1                        |
| 14010524  | 3.45                  | 3                        | 2.47                  | 2                        | 2.98                  | 3                        | 2.97                  | 3                        |
| 14010525  | 1.62                  | 2                        | 1.54                  | 2                        | 1.56                  | 2                        | 1.57                  | 2                        |
| 14010527  | 4.90                  | 5                        | 4.88                  | 5                        | 4.79                  | 5                        | 4.86                  | 5                        |
| 14010536  | 1.41                  | 1                        | 1.54                  | 2                        | 1.59                  | 2                        | 1.52                  | 2                        |
| 14010537  | 4.74                  | 5                        | 4.93                  | 5                        | 5.36                  | 5                        | 5.01                  | 5                        |
| 14010538  | 2.88                  | 3                        | 3.17                  | 3                        | 3.70                  | 4                        | 3.25                  | 3                        |
| 14010539  | 3.01                  | 3                        | 3.27                  | 3                        | 3.70                  | 4                        | 3.32                  | 3                        |
| 14010541  | 4.47                  | 4                        | 4.76                  | 5                        | 4.77                  | 5                        | 4.67                  | 5                        |
| 14010544  | 2.09                  | 2                        | 1.90                  | 2                        | 2.05                  | 2                        | 2.01                  | 2                        |
| 14010545  | 0.89                  | 1                        | 0.84                  | 1                        | 0.82                  | 1                        | 0.85                  | 1                        |
| 14010548  | 2.73                  | 3                        | 2.63                  | 3                        | 2.50                  | 3                        | 2.62                  | 3                        |
| 14010553  | 0.86                  | 1                        | 0.86                  | 1                        | 0.71                  | 1                        | 0.81                  | 1                        |
| 14010554  | 1.38                  | 1                        | 1.40                  | 1                        | 1.19                  | 1                        | 1.33                  | 1                        |
| 14010555  | 1.84                  | 2                        | 1.95                  | 2                        | 1.99                  | 2                        | 1.93                  | 2                        |
| 14010557  | 4.87                  | 5                        | 4.51                  | 5                        | 4.43                  | 4                        | 4.60                  | 5                        |

| Sample ID | Copy Number           |                          |                       |                          |                       |                          |                       |                          |
|-----------|-----------------------|--------------------------|-----------------------|--------------------------|-----------------------|--------------------------|-----------------------|--------------------------|
|           | r = 1                 |                          | r = 2                 |                          | r = 3                 |                          | Average               |                          |
|           | Ratio<br>(target/ref) | Estimated<br>Copy Number |
| 14010558  | 3.59                  | 4                        | 3.19                  | 3                        | 3.03                  | 3                        | 3.27                  | 3                        |
| 14010559  | 1.59                  | 2                        | 1.52                  | 2                        | 1.38                  | 1                        | 1.50                  | 1                        |
| 14010561  | 11.46                 | 11                       | 11.85                 | 12                       | 12.65                 | 13                       | 11.99                 | 12                       |
| 14010564  | 1.11                  | 1                        | 0.95                  | 1                        | 0.91                  | 1                        | 0.99                  | 1                        |
| 14010567  | 1.35                  | 1                        | 1.74                  | 2                        | 1.57                  | 2                        | 1.55                  | 2                        |
| 14010568  | 0.27                  | 0                        | 0.31                  | 0                        | 0.30                  | 0                        | 0.30                  | 0                        |
| 14010571  | 1.84                  | 2                        | 1.97                  | 2                        | 2.15                  | 2                        | 1.98                  | 2                        |
| 14010572  | 3.90                  | 4                        | 4.23                  | 4                        | 3.59                  | 4                        | 3.91                  | 4                        |
| 14010573  | 2.07                  | 2                        | 1.90                  | 2                        | 1.88                  | 2                        | 1.95                  | 2                        |
| 14010576  | 3.03                  | 3                        | 2.75                  | 3                        | 2.92                  | 3                        | 2.90                  | 3                        |
| 14010578  | 6.11                  | 6                        | 4.51                  | 5                        | 4.85                  | 5                        | 5.16                  | 5                        |
| 14010580  | 1.54                  | 2                        | 1.53                  | 2                        | 1.60                  | 2                        | 1.56                  | 2                        |
| 14010581  | 4.85                  | 5                        | 4.57                  | 5                        | 4.08                  | 4                        | 4.50                  | 4                        |
| 14010584  | 2.55                  | 3                        | 2.78                  | 3                        | 2.83                  | 3                        | 2.72                  | 3                        |
| 14010585  | 1.28                  | 1                        | 1.30                  | 1                        | 1.36                  | 1                        | 1.32                  | 1                        |
| 14010586  | 3.55                  | 4                        | 3.39                  | 3                        | 3.62                  | 4                        | 3.52                  | 4                        |
| 14010587  | 3.20                  | 3                        | 3.34                  | 3                        | 3.49                  | 3                        | 3.34                  | 3                        |
| 14010588  | 1.35                  | 1                        | 1.31                  | 1                        | 1.47                  | 1                        | 1.38                  | 1                        |
| 14010590  | 1.72                  | 2                        | 1.56                  | 2                        | 2.10                  | 2                        | 1.79                  | 2                        |



| Sample ID | Copy Number           |                          |                       |                          |                       |                          |                       |                          |
|-----------|-----------------------|--------------------------|-----------------------|--------------------------|-----------------------|--------------------------|-----------------------|--------------------------|
|           | r = 1                 |                          | r = 2                 |                          | r = 3                 |                          | Average               |                          |
|           | Ratio<br>(target/ref) | Estimated<br>Copy Number |
| 14010594  | 1.23                  | 1                        | 1.35                  | 1                        | 1.31                  | 1                        | 1.29                  | 1                        |
| 14010596  | 12.42                 | 12                       | 11.30                 | 11                       | 9.85                  | 10                       | 11.19                 | 11                       |
| 14010597  | 10.64                 | 11                       | 11.43                 | 11                       | 8.99                  | 9                        | 10.35                 | 10                       |
| 14010600  | 3.34                  | 3                        | 3.28                  | 3                        | 3.08                  | 3                        | 3.23                  | 3                        |
| 14010601  | 1.31                  | 1                        | 1.47                  | 1                        | 1.22                  | 1                        | 1.34                  | 1                        |
| 14010602  | 1.38                  | 1                        | 1.34                  | 1                        | 1.23                  | 1                        | 1.32                  | 1                        |
| 14010603  | 1.43                  | 1                        | 1.29                  | 1                        | 1.24                  | 1                        | 1.32                  | 1                        |
| 14010604  | 1.56                  | 2                        | 1.45                  | 1                        | 1.30                  | 1                        | 1.44                  | 1                        |
| 14010606  | 2.99                  | 3                        | 2.53                  | 3                        | 2.45                  | 2                        | 2.66                  | 3                        |
| 14010607  | 1.10                  | 1                        | 1.17                  | 1                        | 1.28                  | 1                        | 1.18                  | 1                        |
| 14010610  | 2.46                  | 2                        | 2.51                  | 3                        | 2.46                  | 2                        | 2.48                  | 2                        |
| 14010611  | 2.53                  | 3                        | 2.54                  | 3                        | 2.65                  | 3                        | 2.57                  | 3                        |
| 14010613  | 2.69                  | 3                        | 3.31                  | 3                        | 3.21                  | 3                        | 3.07                  | 3                        |
| 14010614  | 5.06                  | 5                        | 5.27                  | 5                        | 5.12                  | 5                        | 5.15                  | 5                        |
| 14010616  | 1.18                  | 1                        | 1.29                  | 1                        | 0.97                  | 1                        | 1.15                  | 1                        |
| 14010621  | 0.89                  | 1                        | 1.62                  | 2                        | 1.40                  | 1                        | 1.30                  | 1                        |
| 14010622  | 1.17                  | 1                        | 1.27                  | 1                        | 1.02                  | 1                        | 1.15                  | 1                        |
| 14010623  | 9.79                  | 10                       | 8.71                  | 9                        | 9.21                  | 9                        | 9.24                  | 9                        |
| 14010624  | 1.81                  | 2                        | 1.59                  | 2                        | 1.42                  | 1                        | 1.61                  | 2                        |

| Sample ID | Copy Number           |                          |                       |                          |                       |                          |                       |                          |
|-----------|-----------------------|--------------------------|-----------------------|--------------------------|-----------------------|--------------------------|-----------------------|--------------------------|
|           | r = 1                 |                          | r = 2                 |                          | r = 3                 |                          | Average               |                          |
|           | Ratio<br>(target/ref) | Estimated<br>Copy Number |
| 14010625  | 1.77                  | 2                        | 1.42                  | 1                        | 1.37                  | 1                        | 1.52                  | 2                        |
| 14010627  | 1.51                  | 2                        | 1.87                  | 2                        | 1.84                  | 2                        | 1.74                  | 2                        |
| 14010628  | 2.07                  | 2                        | 1.60                  | 2                        | 1.51                  | 2                        | 1.72                  | 2                        |
| 14010629  | 1.48                  | 1                        | 1.62                  | 2                        | 1.68                  | 2                        | 1.59                  | 2                        |
| 14010630  | 1.22                  | 1                        | 1.16                  | 1                        | 1.38                  | 1                        | 1.25                  | 1                        |
| 14010633  | 1.36                  | 1                        | 1.35                  | 1                        | 1.44                  | 1                        | 1.38                  | 1                        |
| 14010638  | 1.00                  | 1                        | 0.76                  | 1                        | 0.73                  | 1                        | 0.83                  | 1                        |
| 14010640  | 4.88                  | 5                        | 4.20                  | 4                        | 4.96                  | 5                        | 4.68                  | 5                        |
| 14010641  | 1.51                  | 2                        | 1.71                  | 2                        | 1.80                  | 2                        | 1.67                  | 2                        |
| 14010645  | 1.07                  | 1                        | 1.00                  | 1                        | 1.00                  | 1                        | 1.02                  | 1                        |
| 14010646  | 1.00                  | 1                        | 1.16                  | 1                        | 1.22                  | 1                        | 1.13                  | 1                        |
| 14010653  | 2.05                  | 2                        | 1.92                  | 2                        | 1.34                  | 1                        | 1.77                  | 2                        |
| 14010655  | 1.30                  | 1                        | 1.51                  | 2                        | 1.17                  | 1                        | 1.32                  | 1                        |
| 14010662  | 4.26                  | 4                        | 1.39                  | 1                        | 1.58                  | 2                        | 2.41                  | 2                        |
| 14010663  | 5.21                  | 5                        | 5.09                  | 5                        | 4.74                  | 5                        | 5.01                  | 5                        |
| 14010666  | 3.45                  | 3                        | 4.70                  | 5                        | 2.93                  | 3                        | 3.69                  | 4                        |
| 14010669  | 4.18                  | 4                        | 3.22                  | 3                        | 3.62                  | 4                        | 3.67                  | 4                        |
| 14010684  | 1.68                  | 2                        | 1.62                  | 2                        | 1.46                  | 1                        | 1.58                  | 2                        |
| 14010690  | 1.52                  | 2                        | 1.32                  | 1                        | 1.20                  | 1                        | 1.35                  | 1                        |

| Sample ID | Copy Number           |                          |                       |                          |                       |                          |                       |                          |
|-----------|-----------------------|--------------------------|-----------------------|--------------------------|-----------------------|--------------------------|-----------------------|--------------------------|
|           | r = 1                 |                          | r = 2                 |                          | r = 3                 |                          | Average               |                          |
|           | Ratio<br>(target/ref) | Estimated<br>Copy Number |
| 14010692  | 1.22                  | 1                        | 1.06                  | 1                        | 1.00                  | 1                        | 1.09                  | 1                        |
| 14010693  | 1.26                  | 1                        | 1.18                  | 1                        | 1.22                  | 1                        | 1.22                  | 1                        |
| 14010695  | 0.95                  | 1                        | 0.75                  | 1                        | 0.87                  | 1                        | 0.86                  | 1                        |
| 14010697  | 1.09                  | 1                        | 0.89                  | 1                        | 0.86                  | 1                        | 0.95                  | 1                        |
| 14010702  | 1.80                  | 2                        | 1.80                  | 2                        | 1.69                  | 2                        | 1.76                  | 2                        |
| 14010704  | 1.03                  | 1                        | 0.92                  | 1                        | 0.89                  | 1                        | 0.94                  | 1                        |
| 14010705  | 2.84                  | 3                        | 2.18                  | 2                        | 2.46                  | 2                        | 2.49                  | 2                        |
| 14010714  | 2.42                  | 2                        | 1.92                  | 2                        | 1.78                  | 2                        | 2.04                  | 2                        |
| 14010715  | 1.20                  | 1                        | 1.10                  | 1                        | 1.06                  | 1                        | 1.12                  | 1                        |
| 14010717  | 1.29                  | 1                        | 1.31                  | 1                        | 1.31                  | 1                        | 1.30                  | 1                        |
| 14010721  | 1.73                  | 2                        | 1.72                  | 2                        | 1.68                  | 2                        | 1.71                  | 2                        |
| 14010723  | 2.17                  | 2                        | 2.28                  | 2                        | 2.23                  | 2                        | 2.23                  | 2                        |
| 14010725  | 0.88                  | 1                        | 0.80                  | 1                        | 0.80                  | 1                        | 0.83                  | 1                        |
| 14010726  | 0.80                  | 1                        | 0.74                  | 1                        | 0.84                  | 1                        | 0.80                  | 1                        |
| 14010727  | 1.52                  | 2                        | 1.51                  | 2                        | 1.46                  | 1                        | 1.50                  | 1                        |
| 14010729  | 1.78                  | 2                        | 1.79                  | 2                        | 1.83                  | 2                        | 1.80                  | 2                        |
| 14010730  | 1.93                  | 2                        | 1.82                  | 2                        | 1.99                  | 2                        | 1.91                  | 2                        |
| 14010731  | 1.98                  | 2                        | 1.87                  | 2                        | 1.91                  | 2                        | 1.92                  | 2                        |
| 14010732  | 1.88                  | 2                        | 1.78                  | 2                        | 1.84                  | 2                        | 1.84                  | 2                        |

| Sample ID | Copy Number           |                          |                       |                          |                       |                          |                       |                          |
|-----------|-----------------------|--------------------------|-----------------------|--------------------------|-----------------------|--------------------------|-----------------------|--------------------------|
|           | r = 1                 |                          | r = 2                 |                          | r = 3                 |                          | Average               |                          |
|           | Ratio<br>(target/ref) | Estimated<br>Copy Number |
| 14010733  | 0.97                  | 1                        | 0.90                  | 1                        | 0.90                  | 1                        | 0.92                  | 1                        |
| 14010734  | 1.10                  | 1                        | 1.17                  | 1                        | 1.03                  | 1                        | 1.10                  | 1                        |
| 14010735  | 1.11                  | 1                        | 1.70                  | 2                        | 1.51                  | 2                        | 1.44                  | 1                        |
| 14010737  | 0.97                  | 1                        | 0.79                  | 1                        | 0.91                  | 1                        | 0.89                  | 1                        |
| 14010738  | 3.20                  | 3                        | 3.07                  | 3                        | 3.15                  | 3                        | 3.14                  | 3                        |
| 14010740  | 1.05                  | 1                        | 0.95                  | 1                        | 0.99                  | 1                        | 1.00                  | 1                        |
| 14010742  | 1.01                  | 1                        | 1.08                  | 1                        | 1.14                  | 1                        | 1.08                  | 1                        |
| 14010744  | 2.67                  | 3                        | 2.17                  | 2                        | 2.78                  | 3                        | 2.54                  | 3                        |
| 14010746  | 4.50                  | 4                        | 5.43                  | 5                        | 5.95                  | 6                        | 5.29                  | 5                        |
| 14010751  | 1.93                  | 2                        | 1.88                  | 2                        | 2.19                  | 2                        | 2.00                  | 2                        |
| 14010753  | 1.06                  | 1                        | 1.14                  | 1                        | 1.20                  | 1                        | 1.13                  | 1                        |
| 14010759  | 3.06                  | 3                        | 2.60                  | 3                        | 2.76                  | 3                        | 2.81                  | 3                        |
| 14010762  | 1.04                  | 1                        | 0.93                  | 1                        | 0.99                  | 1                        | 0.99                  | 1                        |
| 14010763  | 4.06                  | 4                        | 4.19                  | 4                        | 3.93                  | 4                        | 4.06                  | 4                        |
| 14010767  | 3.80                  | 4                        | 4.04                  | 4                        | 3.69                  | 4                        | 3.84                  | 4                        |
| 14010768  | 1.16                  | 1                        | 1.07                  | 1                        | 1.06                  | 1                        | 1.09                  | 1                        |
| 14010773  | 2.23                  | 2                        | 2.54                  | 3                        | 2.97                  | 3                        | 2.58                  | 3                        |
| 14010775  | 3.49                  | 3                        | 4.07                  | 4                        | 4.67                  | 5                        | 4.08                  | 4                        |
| 14010776  | 3.66                  | 4                        | 4.09                  | 4                        | 3.75                  | 4                        | 3.83                  | 4                        |

| Sample ID | Copy Number           |                          |                       |                          |                       |                          |                       |                          |
|-----------|-----------------------|--------------------------|-----------------------|--------------------------|-----------------------|--------------------------|-----------------------|--------------------------|
|           | r = 1                 |                          | r = 2                 |                          | r = 3                 |                          | Average               |                          |
|           | Ratio<br>(target/ref) | Estimated<br>Copy Number |
| 14010779  | 0.81                  | 1                        | 0.73                  | 1                        | 0.42                  | 0                        | 0.65                  | 1                        |
| 14010780  | 0.93                  | 1                        | 1.00                  | 1                        | 1.22                  | 1                        | 1.05                  | 1                        |
| 14010782  | 0.93                  | 1                        | 0.99                  | 1                        | 0.91                  | 1                        | 0.94                  | 1                        |
| 14010785  | 1.01                  | 1                        | 1.03                  | 1                        | 1.27                  | 1                        | 1.10                  | 1                        |
| 14010786  | 1.09                  | 1                        | 1.03                  | 1                        | 1.13                  | 1                        | 1.08                  | 1                        |
| 14010789  | 5.47                  | 5                        | 5.42                  | 5                        | 5.82                  | 6                        | 5.57                  | 6                        |
| 14010799  | 5.75                  | 6                        | 6.13                  | 6                        | 5.77                  | 6                        | 5.88                  | 6                        |
| 14010803  | 3.48                  | 3                        | 4.51                  | 5                        | 4.50                  | 5                        | 4.16                  | 4                        |
| 14010808  | 0.94                  | 1                        | 1.17                  | 1                        | 0.89                  | 1                        | 1.00                  | 1                        |
| 14010810  | 0.99                  | 1                        | 1.10                  | 1                        | 1.04                  | 1                        | 1.05                  | 1                        |
| 14010811  | 0.06                  | 0                        | 0.05                  | 0                        | 0.04                  | 0                        | 0.05                  | 0                        |
| 14010815  | 2.08                  | 2                        | 1.84                  | 2                        | 2.01                  | 2                        | 1.98                  | 2                        |
| 14010821  | 1.68                  | 2                        | 1.81                  | 2                        | 1.84                  | 2                        | 1.78                  | 2                        |
| 14010823  | 0.89                  | 1                        | 1.00                  | 1                        | 1.03                  | 1                        | 0.97                  | 1                        |
| 14010824  | 1.83                  | 2                        | 1.63                  | 2                        | 1.90                  | 2                        | 1.79                  | 2                        |
| 14010825  | 1.05                  | 1                        | 1.02                  | 1                        | 1.06                  | 1                        | 1.04                  | 1                        |
| 14010826  | 1.08                  | 1                        | 1.06                  | 1                        | 1.16                  | 1                        | 1.10                  | 1                        |
| 14010827  | 1.01                  | 1                        | 0.96                  | 1                        | 1.00                  | 1                        | 0.99                  | 1                        |
| 14010829  | 1.14                  | 1                        | 0.80                  | 1                        | 1.03                  | 1                        | 0.99                  | 1                        |

| Sample ID | Copy Number           |                          |                       |                          |                       |                          |                       |                          |
|-----------|-----------------------|--------------------------|-----------------------|--------------------------|-----------------------|--------------------------|-----------------------|--------------------------|
|           | r = 1                 |                          | r = 2                 |                          | r = 3                 |                          | Average               |                          |
|           | Ratio<br>(target/ref) | Estimated<br>Copy Number |
| 14010831  | 3.14                  | 3                        | 3.19                  | 3                        | 3.00                  | 3                        | 3.11                  | 3                        |
| 14010835  | 1.26                  | 1                        | 0.91                  | 1                        | 1.01                  | 1                        | 1.06                  | 1                        |
| 14010840  | 3.52                  | 4                        | 2.61                  | 3                        | 2.43                  | 2                        | 2.85                  | 3                        |
| 14010843  | 1.74                  | 2                        | 1.72                  | 2                        | 1.54                  | 2                        | 1.66                  | 2                        |
| 14010845  | 1.16                  | 1                        | 0.99                  | 1                        | 0.92                  | 1                        | 1.02                  | 1                        |
| 14010848  | 1.07                  | 1                        | 1.06                  | 1                        | 1.04                  | 1                        | 1.06                  | 1                        |
| 14010850  | 10.09                 | 10                       | 6.05                  | 6                        | 8.63                  | 9                        | 8.26                  | 8                        |
| 14010854  | 0.35                  | 0                        | 0.38                  | 0                        | 0.31                  | 0                        | 0.35                  | 0                        |
| 14010855  | 2.09                  | 2                        | 2.25                  | 2                        | 1.94                  | 2                        | 2.09                  | 2                        |
| 14010857  | 1.27                  | 1                        | 1.40                  | 1                        | 1.25                  | 1                        | 1.31                  | 1                        |
| 14010862  | 1.79                  | 2                        | 1.52                  | 2                        | 1.77                  | 2                        | 1.69                  | 2                        |
| 14010865  | 0.60                  | 1                        | 0.66                  | 1                        | 0.63                  | 1                        | 0.63                  | 1                        |
| 14010866  | 0.85                  | 1                        | 0.89                  | 1                        | 0.98                  | 1                        | 0.90                  | 1                        |
| 14010867  | 1.07                  | 1                        | 1.05                  | 1                        | 0.82                  | 1                        | 0.98                  | 1                        |
| 14010870  | 2.98                  | 3                        | 2.85                  | 3                        | 2.77                  | 3                        | 2.87                  | 3                        |
| 14010872  | 3.35                  | 3                        | 3.57                  | 4                        | 3.42                  | 3                        | 3.45                  | 3                        |
| 14010873  | 8.66                  | 9                        | 9.56                  | 10                       | 9.80                  | 10                       | 9.34                  | 9                        |
| 14010875  | 1.44                  | 1                        | 1.20                  | 1                        | 1.08                  | 1                        | 1.24                  | 1                        |
| 14010878  | 1.14                  | 1                        | 1.10                  | 1                        | 1.07                  | 1                        | 1.10                  | 1                        |

| Sample ID | Copy Number           |                          |                       |                          |                       |                          |                       |                          |
|-----------|-----------------------|--------------------------|-----------------------|--------------------------|-----------------------|--------------------------|-----------------------|--------------------------|
|           | r = 1                 |                          | r = 2                 |                          | r = 3                 |                          | Average               |                          |
|           | Ratio<br>(target/ref) | Estimated<br>Copy Number |
| 14010881  | 1.45                  | 1                        | 0.11                  | 0                        | 1.55                  | 2                        | 1.04                  | 1                        |
| 14010882  | 1.58                  | 2                        | 1.56                  | 2                        | 1.67                  | 2                        | 1.60                  | 2                        |
| 14010884  | 4.02                  | 4                        | 4.21                  | 4                        | 4.19                  | 4                        | 4.14                  | 4                        |
| 14010886  | 1.08                  | 1                        | 1.06                  | 1                        | 1.07                  | 1                        | 1.07                  | 1                        |
| 14010888  | 1.24                  | 1                        | 1.10                  | 1                        | 1.27                  | 1                        | 1.20                  | 1                        |
| 14010889  | 3.37                  | 3                        | 3.44                  | 3                        | 3.46                  | 3                        | 3.42                  | 3                        |
| 14010890  | 0.90                  | 1                        | 1.07                  | 1                        | 1.08                  | 1                        | 1.02                  | 1                        |
| 14010892  | 9.19                  | 9                        | 9.76                  | 10                       | 10.74                 | 11                       | 9.90                  | 10                       |
| 14010895  | 1.09                  | 1                        | 1.06                  | 1                        | 1.09                  | 1                        | 1.08                  | 1                        |
| 14010897  | 1.95                  | 2                        | 1.86                  | 2                        | 1.98                  | 2                        | 1.93                  | 2                        |
| 14010898  | 5.38                  | 5                        | 5.35                  | 5                        | 6.06                  | 6                        | 5.60                  | 6                        |
| 14010899  | 4.29                  | 4                        | 4.36                  | 4                        | 4.27                  | 4                        | 4.31                  | 4                        |
| 14010900  | 6.24                  | 6                        | 5.71                  | 6                        | 5.98                  | 6                        | 5.98                  | 6                        |
| 14010901  | 4.34                  | 4                        | 4.03                  | 4                        | 4.69                  | 5                        | 4.35                  | 4                        |
| 14010904  | 2.13                  | 2                        | 2.05                  | 2                        | 2.09                  | 2                        | 2.09                  | 2                        |
| 14010905  | 2.01                  | 2                        | 2.08                  | 2                        | 1.72                  | 2                        | 1.94                  | 2                        |
| 14010908  | 1.68                  | 2                        | 1.70                  | 2                        | 1.80                  | 2                        | 1.73                  | 2                        |
| 14010909  | 1.46                  | 1                        | 1.86                  | 2                        | 2.30                  | 2                        | 1.88                  | 2                        |
| 14010915  | 3.45                  | 3                        | 2.63                  | 3                        | 2.75                  | 3                        | 2.94                  | 3                        |

| Sample ID | Copy Number           |                          |                       |                          |                       |                          |                       |                          |
|-----------|-----------------------|--------------------------|-----------------------|--------------------------|-----------------------|--------------------------|-----------------------|--------------------------|
|           | r = 1                 |                          | r = 2                 |                          | r = 3                 |                          | Average               |                          |
|           | Ratio<br>(target/ref) | Estimated<br>Copy Number |
| 14010916  | 4.82                  | 5                        | 2.96                  | 3                        | 3.76                  | 4                        | 3.85                  | 4                        |
| 14010919  | 1.74                  | 2                        | 1.64                  | 2                        | 1.63                  | 2                        | 1.67                  | 2                        |
| 14010921  | 1.10                  | 1                        | 1.07                  | 1                        | 1.08                  | 1                        | 1.08                  | 1                        |
| 14010924  | 1.01                  | 1                        | 0.99                  | 1                        | 1.02                  | 1                        | 1.01                  | 1                        |
| 14010926  | 2.29                  | 2                        | 2.67                  | 3                        | 2.49                  | 2                        | 2.48                  | 2                        |
| 14010928  | 1.04                  | 1                        | 0.95                  | 1                        | 1.17                  | 1                        | 1.06                  | 1                        |
| 14010930  | 0.89                  | 1                        | 0.80                  | 1                        | 0.94                  | 1                        | 0.88                  | 1                        |
| 14010932  | 0.04                  | 0                        | 0.04                  | 0                        | 0.03                  | 0                        | 0.04                  | 0                        |
| 14010934  | 1.04                  | 1                        | 1.07                  | 1                        | 1.03                  | 1                        | 1.05                  | 1                        |
| 14010938  | 0.76                  | 1                        | 0.84                  | 1                        | 0.85                  | 1                        | 0.82                  | 1                        |
| 14010941  | 0.81                  | 1                        | 0.84                  | 1                        | 1.10                  | 1                        | 0.91                  | 1                        |
| 14010948  | 0.94                  | 1                        | 0.87                  | 1                        | 1.05                  | 1                        | 0.95                  | 1                        |
| 14010950  | 0.94                  | 1                        | 1.00                  | 1                        | 1.32                  | 1                        | 1.09                  | 1                        |
| 14010952  | 2.69                  | 3                        | 3.94                  | 4                        | 2.69                  | 3                        | 3.11                  | 3                        |
| 14010955  | 4.92                  | 5                        | 4.09                  | 4                        | 4.40                  | 4                        | 4.47                  | 4                        |
| 14010956  | 4.86                  | 5                        | 4.71                  | 5                        | 3.87                  | 4                        | 4.48                  | 4                        |
| 14010963  | 1.38                  | 1                        | 1.41                  | 1                        | 1.20                  | 1                        | 1.33                  | 1                        |
| 14010971  | 2.42                  | 2                        | 2.14                  | 2                        | 1.82                  | 2                        | 2.13                  | 2                        |
| 14010972  | 2.26                  | 2                        | 2.07                  | 2                        | 1.94                  | 2                        | 2.09                  | 2                        |



| Sample ID | Copy Number           |                          |                       |                          |                       |                          |                       |                          |
|-----------|-----------------------|--------------------------|-----------------------|--------------------------|-----------------------|--------------------------|-----------------------|--------------------------|
|           | r = 1                 |                          | r = 2                 |                          | r = 3                 |                          | Average               |                          |
|           | Ratio<br>(target/ref) | Estimated<br>Copy Number |
| 14010973  | 2.97                  | 3                        | 3.53                  | 4                        | 2.47                  | 2                        | 2.99                  | 3                        |
| 14010976  | 1.00                  | 1                        | 1.10                  | 1                        | 1.08                  | 1                        | 1.06                  | 1                        |
| 14010978  | 3.69                  | 4                        | 3.66                  | 4                        | 3.31                  | 3                        | 3.55                  | 4                        |
| 14010979  | 1.49                  | 1                        | 1.35                  | 1                        | 1.29                  | 1                        | 1.37                  | 1                        |
| 14010987  | 2.59                  | 3                        | 2.62                  | 3                        | 1.55                  | 2                        | 2.25                  | 2                        |
| 14010996  | 0.52                  | 1                        | 0.45                  | 0                        | 0.53                  | 1                        | 0.50                  | 0                        |
| 14010997  | 1.79                  | 2                        | 2.94                  | 3                        | 3.06                  | 3                        | 2.60                  | 3                        |
| 14011002  | 1.15                  | 1                        | 1.26                  | 1                        | 1.27                  | 1                        | 1.22                  | 1                        |
| 14011003  | 2.49                  | 2                        | 2.67                  | 3                        | 2.84                  | 3                        | 2.66                  | 3                        |
| 14011006  | 1.40                  | 1                        | 1.12                  | 1                        | 1.27                  | 1                        | 1.26                  | 1                        |
| 14011007  | 2.37                  | 2                        | 2.51                  | 3                        | 2.66                  | 3                        | 2.51                  | 3                        |
| 14011008  | 2.25                  | 2                        | 2.13                  | 2                        | 2.40                  | 2                        | 2.26                  | 2                        |
| 14011011  | 2.36                  | 2                        | 2.62                  | 3                        | 2.61                  | 3                        | 2.53                  | 3                        |
| 14011012  | 2.97                  | 3                        | 2.73                  | 3                        | 2.76                  | 3                        | 2.82                  | 3                        |
| 14011018  | 1.38                  | 1                        | 1.22                  | 1                        | 1.28                  | 1                        | 1.29                  | 1                        |
| 14011019  | 7.52                  | 8                        | 6.53                  | 7                        | 6.55                  | 7                        | 6.87                  | 7                        |
| 14011022  | 3.30                  | 3                        | 3.40                  | 3                        | 3.27                  | 3                        | 3.32                  | 3                        |
| 14011028  | 1.18                  | 1                        | 1.25                  | 1                        | 1.02                  | 1                        | 1.15                  | 1                        |
| 14011029  | 1.35                  | 1                        | 1.20                  | 1                        | 1.15                  | 1                        | 1.23                  | 1                        |

| Sample ID | Copy Number           |                          |                       |                          |                       |                          |                       |                          |
|-----------|-----------------------|--------------------------|-----------------------|--------------------------|-----------------------|--------------------------|-----------------------|--------------------------|
|           | r = 1                 |                          | r = 2                 |                          | r = 3                 |                          | Average               |                          |
|           | Ratio<br>(target/ref) | Estimated<br>Copy Number |
| 14011030  | 1.50                  | 2                        | 1.25                  | 1                        | 1.16                  | 1                        | 1.31                  | 1                        |
| 14011035  | 2.92                  | 3                        | 2.75                  | 3                        | 2.47                  | 2                        | 2.71                  | 3                        |
| 14011037  | 0.62                  | 1                        | 1.31                  | 1                        | 0.62                  | 1                        | 0.85                  | 1                        |
| 14011041  | 2.40                  | 2                        | 2.01                  | 2                        | 1.74                  | 2                        | 2.05                  | 2                        |
| 14011046  | 1.02                  | 1                        | 1.11                  | 1                        | 1.00                  | 1                        | 1.04                  | 1                        |
| 14011054  | 3.58                  | 4                        | 4.16                  | 4                        | 5.59                  | 6                        | 4.44                  | 4                        |
| 14011055  | 1.29                  | 1                        | 0.97                  | 1                        | 1.08                  | 1                        | 1.11                  | 1                        |
| 14011057  | 1.37                  | 1                        | 1.55                  | 2                        | 1.55                  | 2                        | 1.49                  | 1                        |
| 14011060  | 1.51                  | 2                        | 1.27                  | 1                        | 1.57                  | 2                        | 1.45                  | 1                        |
| 14011061  | 1.68                  | 2                        | 2.06                  | 2                        | 2.40                  | 2                        | 2.04                  | 2                        |
| 14011065  | 3.27                  | 3                        | 3.58                  | 4                        | 3.62                  | 4                        | 3.49                  | 3                        |
| 14011066  | 1.45                  | 1                        | 1.31                  | 1                        | 0.96                  | 1                        | 1.24                  | 1                        |
| 14011067  | 4.78                  | 5                        | 4.16                  | 4                        | 5.18                  | 5                        | 4.71                  | 5                        |
| 14011069  | 1.81                  | 2                        | 1.90                  | 2                        | 1.85                  | 2                        | 1.85                  | 2                        |
| 14011070  | 1.54                  | 2                        | 1.55                  | 2                        | 1.83                  | 2                        | 1.64                  | 2                        |
| 14011071  | 4.18                  | 4                        | 4.67                  | 5                        | 4.14                  | 4                        | 4.33                  | 4                        |
| 14011073  | 1.40                  | 1                        | 1.40                  | 1                        | 1.41                  | 1                        | 1.40                  | 1                        |
| 14011074  | 1.38                  | 1                        | 1.58                  | 2                        | 1.66                  | 2                        | 1.54                  | 2                        |
| 14011075  | 2.13                  | 2                        | 2.41                  | 2                        | 1.93                  | 2                        | 2.15                  | 2                        |

| Sample ID | Copy Number           |                          |                       |                          |                       |                          |                       |                          |
|-----------|-----------------------|--------------------------|-----------------------|--------------------------|-----------------------|--------------------------|-----------------------|--------------------------|
|           | r = 1                 |                          | r = 2                 |                          | r = 3                 |                          | Average               |                          |
|           | Ratio<br>(target/ref) | Estimated<br>Copy Number |
| 14011077  | 4.20                  | 4                        | 4.95                  | 5                        | 6.15                  | 6                        | 5.10                  | 5                        |
| 14011078  | 1.02                  | 1                        | 1.12                  | 1                        | 1.08                  | 1                        | 1.07                  | 1                        |
| 14011081  | 16.15                 | 16                       | 14.43                 | 14                       | 19.50                 | 19                       | 16.69                 | 17                       |
| 14011082  | 1.72                  | 2                        | 1.78                  | 2                        | 1.44                  | 1                        | 1.65                  | 2                        |
| 14011083  | 3.82                  | 4                        | 3.77                  | 4                        | 4.32                  | 4                        | 3.97                  | 4                        |
| 14011084  | 5.18                  | 5                        | 5.34                  | 5                        | 4.72                  | 5                        | 5.08                  | 5                        |
| 14011089  | 2.91                  | 3                        | 2.95                  | 3                        | 2.92                  | 3                        | 2.93                  | 3                        |
| 14011090  | 6.65                  | 7                        | 5.91                  | 6                        | 5.20                  | 5                        | 5.92                  | 6                        |
| 14011091  | 7.28                  | 7                        | 7.80                  | 8                        | 7.05                  | 7                        | 7.37                  | 7                        |
| 14011092  | 8.95                  | 9                        | 8.42                  | 8                        | 7.91                  | 8                        | 8.43                  | 8                        |
| 14011094  | 3.87                  | 4                        | 3.19                  | 3                        | 2.70                  | 3                        | 3.25                  | 3                        |
| 14011095  | 1.94                  | 2                        | 2.40                  | 2                        | 2.19                  | 2                        | 2.18                  | 2                        |
| 14011097  | 1.30                  | 1                        | 1.07                  | 1                        | 1.10                  | 1                        | 1.16                  | 1                        |
| 14011098  | 1.50                  | 1                        | 1.23                  | 1                        | 1.40                  | 1                        | 1.38                  | 1                        |
| 14011100  | 9.39                  | 9                        | 9.55                  | 10                       | 7.42                  | 7                        | 8.79                  | 9                        |
| 14011101  | 4.28                  | 4                        | 4.27                  | 4                        | 3.94                  | 4                        | 4.16                  | 4                        |
| 14011103  | 4.85                  | 5                        | 4.86                  | 5                        | 4.69                  | 5                        | 4.80                  | 5                        |
| 14011106  | 1.58                  | 2                        | 1.74                  | 2                        | 1.60                  | 2                        | 1.64                  | 2                        |
| 14011110  | 3.53                  | 4                        | 3.57                  | 4                        | 3.38                  | 3                        | 3.49                  | 3                        |

| Sample ID | Copy Number           |                          |                       |                          |                       |                          |                       |                          |
|-----------|-----------------------|--------------------------|-----------------------|--------------------------|-----------------------|--------------------------|-----------------------|--------------------------|
|           | r = 1                 |                          | r = 2                 |                          | r = 3                 |                          | Average               |                          |
|           | Ratio<br>(target/ref) | Estimated<br>Copy Number |
| 14020010  | 5.38                  | 5                        | 4.49                  | 4                        | 5.39                  | 5                        | 5.09                  | 5                        |
| 14020011  | 2.51                  | 3                        | 2.51                  | 3                        | 2.65                  | 3                        | 2.56                  | 3                        |
| 14020012  | 1.13                  | 1                        | 1.23                  | 1                        | 1.16                  | 1                        | 1.17                  | 1                        |
| 14020013  | 1.86                  | 2                        | 1.83                  | 2                        | 2.27                  | 2                        | 1.99                  | 2                        |
| 14020015  | 7.14                  | 7                        | 6.33                  | 6                        | 7.27                  | 7                        | 6.91                  | 7                        |
| 14020016  | 1.03                  | 1                        | 1.25                  | 1                        | 1.21                  | 1                        | 1.16                  | 1                        |
| 14020017  | 1.76                  | 2                        | 1.97                  | 2                        | 1.95                  | 2                        | 1.89                  | 2                        |
| 14020021  | 1.80                  | 2                        | 2.00                  | 2                        | 2.00                  | 2                        | 1.93                  | 2                        |
| 14020022  | 2.60                  | 3                        | 2.49                  | 2                        | 2.45                  | 2                        | 2.52                  | 3                        |
| 14020023  | 1.70                  | 2                        | 1.83                  | 2                        | 2.32                  | 2                        | 1.95                  | 2                        |
| 14020024  | 1.32                  | 1                        | 1.31                  | 1                        | 1.14                  | 1                        | 1.26                  | 1                        |
| 14020027  | 1.36                  | 1                        | 1.18                  | 1                        | 1.30                  | 1                        | 1.28                  | 1                        |
| 14020042  | 1.17                  | 1                        | 1.00                  | 1                        | 1.08                  | 1                        | 1.08                  | 1                        |
| 14020043  | 5.37                  | 5                        | 4.14                  | 4                        | 4.70                  | 5                        | 4.74                  | 5                        |
| 14020045  | 1.35                  | 1                        | 1.53                  | 2                        | 1.11                  | 1                        | 1.33                  | 1                        |
| 14020046  | 4.12                  | 4                        | 4.73                  | 5                        | 5.02                  | 5                        | 4.63                  | 5                        |
| 14020049  | 1.11                  | 1                        | 0.93                  | 1                        | 1.13                  | 1                        | 1.06                  | 1                        |
| 14020050  | 1.10                  | 1                        | 1.04                  | 1                        | 0.95                  | 1                        | 1.03                  | 1                        |
| 14020053  | 1.27                  | 1                        | 1.23                  | 1                        | 1.40                  | 1                        | 1.30                  | 1                        |

| Sample ID | Copy Number           |                          |                       |                          |                       |                          |                       |                          |
|-----------|-----------------------|--------------------------|-----------------------|--------------------------|-----------------------|--------------------------|-----------------------|--------------------------|
|           | r = 1                 |                          | r = 2                 |                          | r = 3                 |                          | Average               |                          |
|           | Ratio<br>(target/ref) | Estimated<br>Copy Number |
| 14020054  | 5.55                  | 6                        | 4.90                  | 5                        | 4.85                  | 5                        | 5.10                  | 5                        |
| 14020055  | 2.54                  | 3                        | 2.56                  | 3                        | 2.92                  | 3                        | 2.67                  | 3                        |
| 14020056  | 2.56                  | 3                        | 1.88                  | 2                        | 2.19                  | 2                        | 2.21                  | 2                        |
| 14020058  | 2.35                  | 2                        | 1.99                  | 2                        | 2.14                  | 2                        | 2.16                  | 2                        |
| 14020059  | 2.79                  | 3                        | 2.75                  | 3                        | 3.10                  | 3                        | 2.88                  | 3                        |
| 14020060  | 1.09                  | 1                        | 1.07                  | 1                        | 1.13                  | 1                        | 1.10                  | 1                        |
| 14020061  | 2.03                  | 2                        | 1.66                  | 2                        | 2.20                  | 2                        | 1.96                  | 2                        |
| 14020065  | 0.98                  | 1                        | 1.04                  | 1                        | 1.01                  | 1                        | 1.01                  | 1                        |
| 14020069  | 1.28                  | 1                        | 1.28                  | 1                        | 1.34                  | 1                        | 1.30                  | 1                        |
| 14020072  | 1.20                  | 1                        | 1.32                  | 1                        | 1.28                  | 1                        | 1.27                  | 1                        |
| 14020073  | 3.05                  | 3                        | 3.30                  | 3                        | 2.91                  | 3                        | 3.09                  | 3                        |
| 14020081  | 5.11                  | 5                        | 4.16                  | 4                        | 4.16                  | 4                        | 4.48                  | 4                        |
| 14020082  | 1.12                  | 1                        | 1.27                  | 1                        | 1.23                  | 1                        | 1.21                  | 1                        |
| 14020083  | 8.63                  | 9                        | 8.63                  | 9                        | 9.62                  | 10                       | 8.96                  | 9                        |
| 14020087  | 2.13                  | 2                        | 2.09                  | 2                        | 2.16                  | 2                        | 2.13                  | 2                        |
| 14020088  | 1.51                  | 2                        | 1.45                  | 1                        | 1.66                  | 2                        | 1.54                  | 2                        |
| 14020090  | 3.49                  | 3                        | 3.71                  | 4                        | 3.44                  | 3                        | 3.55                  | 4                        |
| 14020093  | 0.40                  | 0                        | 0.37                  | 0                        | 0.40                  | 0                        | 0.39                  | 0                        |
| 14020100  | 1.18                  | 1                        | 1.17                  | 1                        | 1.07                  | 1                        | 1.14                  | 1                        |

| Sample ID | Copy Number           |                          |                       |                          |                       |                          |                       |                          |
|-----------|-----------------------|--------------------------|-----------------------|--------------------------|-----------------------|--------------------------|-----------------------|--------------------------|
|           | r = 1                 |                          | r = 2                 |                          | r = 3                 |                          | Average               |                          |
|           | Ratio<br>(target/ref) | Estimated<br>Copy Number |
| 14020101  | 2.18                  | 2                        | 2.20                  | 2                        | 2.16                  | 2                        | 2.18                  | 2                        |
| 14020102  | 2.34                  | 2                        | 2.30                  | 2                        | 2.07                  | 2                        | 2.24                  | 2                        |
| 14020103  | 0.54                  | 1                        | 0.49                  | 0                        | 0.52                  | 1                        | 0.52                  | 1                        |
| 14020105  | 4.97                  | 5                        | 5.59                  | 6                        | 5.89                  | 6                        | 5.48                  | 5                        |
| 14020113  | 3.59                  | 4                        | 3.98                  | 4                        | 4.41                  | 4                        | 3.99                  | 4                        |
| 14020114  | 1.09                  | 1                        | 1.20                  | 1                        | 1.14                  | 1                        | 1.15                  | 1                        |
| 14020116  | 2.07                  | 2                        | 2.29                  | 2                        | 2.05                  | 2                        | 2.14                  | 2                        |
| 14020117  | 5.79                  | 6                        | 4.69                  | 5                        | 4.67                  | 5                        | 5.05                  | 5                        |
| 14020118  | 2.05                  | 2                        | 2.62                  | 3                        | 2.27                  | 2                        | 2.32                  | 2                        |
| 14020119  | 1.99                  | 2                        | 1.52                  | 2                        | 1.51                  | 2                        | 1.67                  | 2                        |
| 14020121  | 2.29                  | 2                        | 2.15                  | 2                        | 1.96                  | 2                        | 2.13                  | 2                        |
| 14020126  | 1.46                  | 1                        | 1.26                  | 1                        | 1.44                  | 1                        | 1.39                  | 1                        |
| 14020127  | 3.53                  | 4                        | 2.92                  | 3                        | 2.61                  | 3                        | 3.02                  | 3                        |
| 14020128  | 4.68                  | 5                        | 3.44                  | 3                        | 2.95                  | 3                        | 3.69                  | 4                        |
| 14020131  | 2.93                  | 3                        | 3.29                  | 3                        | 2.99                  | 3                        | 3.07                  | 3                        |
| 14020132  | 2.88                  | 3                        | 3.20                  | 3                        | 2.88                  | 3                        | 2.99                  | 3                        |
| 14020134  | 1.88                  | 2                        | 1.79                  | 2                        | 1.54                  | 2                        | 1.73                  | 2                        |
| 14020135  | 2.39                  | 2                        | 1.93                  | 2                        | 2.06                  | 2                        | 2.13                  | 2                        |
| 14020146  | 4.47                  | 4                        | 4.58                  | 5                        | 4.22                  | 4                        | 4.42                  | 4                        |

| Sample ID | Copy Number           |                          |                       |                          |                       |                          |                       |                          |
|-----------|-----------------------|--------------------------|-----------------------|--------------------------|-----------------------|--------------------------|-----------------------|--------------------------|
|           | r = 1                 |                          | r = 2                 |                          | r = 3                 |                          | Average               |                          |
|           | Ratio<br>(target/ref) | Estimated<br>Copy Number |
| 14020147  | 5.17                  | 5                        | 4.88                  | 5                        | 4.87                  | 5                        | 4.97                  | 5                        |
| 14020150  | 2.51                  | 3                        | 2.80                  | 3                        | 3.03                  | 3                        | 2.78                  | 3                        |
| 14020152  | 3.27                  | 3                        | 3.39                  | 3                        | 3.21                  | 3                        | 3.29                  | 3                        |
| 14020157  | 1.77                  | 2                        | 1.99                  | 2                        | 2.16                  | 2                        | 1.98                  | 2                        |
| 14020158  | 2.65                  | 3                        | 2.95                  | 3                        | 3.36                  | 3                        | 2.99                  | 3                        |
| 14020159  | 9.17                  | 9                        | 11.49                 | 11                       | 12.47                 | 12                       | 11.04                 | 11                       |
| 14020160  | 9.41                  | 9                        | 11.29                 | 11                       | 12.89                 | 13                       | 11.20                 | 11                       |
| 14020161  | 7.53                  | 8                        | 7.74                  | 8                        | 9.29                  | 9                        | 8.18                  | 8                        |
| 14020162  | 3.94                  | 4                        | 3.66                  | 4                        | 3.74                  | 4                        | 3.78                  | 4                        |
| 14020165  | 1.69                  | 2                        | 1.45                  | 1                        | 1.36                  | 1                        | 1.50                  | 1                        |
| 14020166  | 1.81                  | 2                        | 1.53                  | 2                        | 1.17                  | 1                        | 1.50                  | 2                        |
| 14020169  | 1.64                  | 2                        | 1.60                  | 2                        | 1.30                  | 1                        | 1.51                  | 2                        |
| 14020170  | 1.35                  | 1                        | 1.13                  | 1                        | 1.22                  | 1                        | 1.23                  | 1                        |
| 14020172  | 6.43                  | 6                        | 5.84                  | 6                        | 6.24                  | 6                        | 6.17                  | 6                        |
| 14020174  | 4.09                  | 4                        | 3.61                  | 4                        | 3.81                  | 4                        | 3.84                  | 4                        |
| 14020175  | 2.31                  | 2                        | 2.25                  | 2                        | 2.11                  | 2                        | 2.22                  | 2                        |
| 14020176  | 1.88                  | 2                        | 1.53                  | 2                        | 1.47                  | 1                        | 1.63                  | 2                        |
| 14020182  | 2.68                  | 3                        | 3.30                  | 3                        | 2.72                  | 3                        | 2.90                  | 3                        |
| 14020190  | 1.27                  | 1                        | 0.97                  | 1                        | 1.20                  | 1                        | 1.15                  | 1                        |

| Sample ID | Copy Number           |                          |                       |                          |                       |                          |                       |                          |
|-----------|-----------------------|--------------------------|-----------------------|--------------------------|-----------------------|--------------------------|-----------------------|--------------------------|
|           | r = 1                 |                          | r = 2                 |                          | r = 3                 |                          | Average               |                          |
|           | Ratio<br>(target/ref) | Estimated<br>Copy Number |
| 14020192  | 1.60                  | 2                        | 1.81                  | 2                        | 1.59                  | 2                        | 1.67                  | 2                        |
| 14020194  | 1.47                  | 1                        | 0.86                  | 1                        | 1.15                  | 1                        | 1.16                  | 1                        |
| 14020201  | 5.39                  | 5                        | 5.70                  | 6                        | 5.94                  | 6                        | 5.68                  | 6                        |
| 14020203  | 1.33                  | 1                        | 1.48                  | 1                        | 1.30                  | 1                        | 1.37                  | 1                        |
| 14020205  | 1.89                  | 2                        | 1.84                  | 2                        | 1.89                  | 2                        | 1.87                  | 2                        |
| 14020207  | 1.09                  | 1                        | 1.13                  | 1                        | 0.98                  | 1                        | 1.07                  | 1                        |
| 14020208  | 2.21                  | 2                        | 1.83                  | 2                        | 1.63                  | 2                        | 1.89                  | 2                        |
| 14020209  | 1.60                  | 2                        | 1.52                  | 2                        | 1.53                  | 2                        | 1.55                  | 2                        |
| 14020210  | 2.63                  | 3                        | 2.64                  | 3                        | 2.33                  | 2                        | 2.53                  | 3                        |
| 14020211  | 3.07                  | 3                        | 3.05                  | 3                        | 2.92                  | 3                        | 3.01                  | 3                        |
| 14020217  | 1.96                  | 2                        | 2.02                  | 2                        | 1.95                  | 2                        | 1.98                  | 2                        |
| 14020218  | 1.36                  | 1                        | 1.46                  | 1                        | 1.51                  | 2                        | 1.44                  | 1                        |
| 14020219  | 1.23                  | 1                        | 1.32                  | 1                        | 1.12                  | 1                        | 1.22                  | 1                        |
| 14020222  | 1.13                  | 1                        | 1.13                  | 1                        | 1.14                  | 1                        | 1.13                  | 1                        |
| 14020223  | 1.05                  | 1                        | 1.16                  | 1                        | 1.04                  | 1                        | 1.08                  | 1                        |
| 14020227  | 1.17                  | 1                        | 1.20                  | 1                        | 1.08                  | 1                        | 1.15                  | 1                        |
| 14020229  | 1.18                  | 1                        | 1.15                  | 1                        | 1.08                  | 1                        | 1.14                  | 1                        |
| 14020231  | 2.32                  | 2                        | 2.33                  | 2                        | 2.25                  | 2                        | 2.30                  | 2                        |
| 14020232  | 2.98                  | 3                        | 3.56                  | 4                        | 2.99                  | 3                        | 3.18                  | 3                        |



| Sample ID | Copy Number           |                          |                       |                          |                       |                          |                       |                          |
|-----------|-----------------------|--------------------------|-----------------------|--------------------------|-----------------------|--------------------------|-----------------------|--------------------------|
|           | r = 1                 |                          | r = 2                 |                          | r = 3                 |                          | Average               |                          |
|           | Ratio<br>(target/ref) | Estimated<br>Copy Number |
| 14020235  | 3.46                  | 3                        | 3.13                  | 3                        | 3.28                  | 3                        | 3.29                  | 3                        |
| 14020236  | 2.69                  | 3                        | 2.74                  | 3                        | 2.84                  | 3                        | 2.76                  | 3                        |
| 14020239  | 5.93                  | 6                        | 1.75                  | 2                        | 3.04                  | 3                        | 3.57                  | 4                        |
| 14020241  | 1.31                  | 1                        | 1.09                  | 1                        | 0.99                  | 1                        | 1.13                  | 1                        |
| 14020242  | 2.27                  | 2                        | 1.99                  | 2                        | 1.78                  | 2                        | 2.01                  | 2                        |
| 14020246  | 3.40                  | 3                        | 3.84                  | 4                        | 4.31                  | 4                        | 3.85                  | 4                        |
| 14020249  | 1.12                  | 1                        | 1.17                  | 1                        | 1.19                  | 1                        | 1.16                  | 1                        |
| 14020250  | 3.40                  | 3                        | 3.99                  | 4                        | 4.01                  | 4                        | 3.80                  | 4                        |
| 14020251  | 4.87                  | 5                        | 5.06                  | 5                        | 4.92                  | 5                        | 4.95                  | 5                        |
| 14020252  | 3.44                  | 3                        | 4.29                  | 4                        | 3.95                  | 4                        | 3.89                  | 4                        |
| 14020253  | 4.46                  | 4                        | 4.84                  | 5                        | 4.13                  | 4                        | 4.48                  | 4                        |
| 14020254  | 3.90                  | 4                        | 3.56                  | 4                        | 3.57                  | 4                        | 3.67                  | 4                        |
| 14020255  | 2.77                  | 3                        | 2.63                  | 3                        | 3.23                  | 3                        | 2.88                  | 3                        |
| 14020258  | 1.60                  | 2                        | 2.25                  | 2                        | 2.27                  | 2                        | 2.04                  | 2                        |
| 14020259  | 2.16                  | 2                        | 2.41                  | 2                        | 2.49                  | 2                        | 2.35                  | 2                        |
| 14020260  | 1.09                  | 1                        | 1.25                  | 1                        | 1.34                  | 1                        | 1.23                  | 1                        |
| 14020261  | 0.63                  | 1                        | 0.66                  | 1                        | 0.71                  | 1                        | 0.67                  | 1                        |
| 14020263  | 0.50                  | 1                        | 0.68                  | 1                        | 0.59                  | 1                        | 0.59                  | 1                        |
| 14020264  | 1.06                  | 1                        | 1.14                  | 1                        | 1.09                  | 1                        | 1.10                  | 1                        |

| Sample ID | Copy Number           |                          |                       |                          |                       |                          |                       |                          |
|-----------|-----------------------|--------------------------|-----------------------|--------------------------|-----------------------|--------------------------|-----------------------|--------------------------|
|           | r = 1                 |                          | r = 2                 |                          | r = 3                 |                          | Average               |                          |
|           | Ratio<br>(target/ref) | Estimated<br>Copy Number |
| 14020265  | 2.18                  | 2                        | 1.96                  | 2                        | 1.91                  | 2                        | 2.02                  | 2                        |
| 14020273  | 1.24                  | 1                        | 1.07                  | 1                        | 1.33                  | 1                        | 1.21                  | 1                        |
| 14020274  | 0.99                  | 1                        | 0.94                  | 1                        | 1.21                  | 1                        | 1.04                  | 1                        |
| 14020275  | 4.52                  | 5                        | 4.46                  | 4                        | 4.20                  | 4                        | 4.39                  | 4                        |
| 14020276  | 4.07                  | 4                        | 3.96                  | 4                        | 4.58                  | 5                        | 4.21                  | 4                        |
| 14020280  | 4.28                  | 4                        | 4.35                  | 4                        | 3.94                  | 4                        | 4.19                  | 4                        |
| 14020283  | 2.86                  | 3                        | 2.48                  | 2                        | 3.30                  | 3                        | 2.88                  | 3                        |
| 14020286  | 2.33                  | 2                        | 3.14                  | 3                        | 2.72                  | 3                        | 2.73                  | 3                        |
| 14020288  | 0.98                  | 1                        | 1.06                  | 1                        | 1.27                  | 1                        | 1.10                  | 1                        |
| 14020290  | 2.76                  | 3                        | 3.06                  | 3                        | 2.84                  | 3                        | 2.89                  | 3                        |
| 14020291  | 3.47                  | 3                        | 3.01                  | 3                        | 3.04                  | 3                        | 3.18                  | 3                        |
| 14020293  | 4.13                  | 4                        | 4.33                  | 4                        | 4.45                  | 4                        | 4.30                  | 4                        |
| 14020294  | 3.34                  | 3                        | 3.98                  | 4                        | 4.34                  | 4                        | 3.89                  | 4                        |
| 14020295  | 3.70                  | 4                        | 3.99                  | 4                        | 5.04                  | 5                        | 4.25                  | 4                        |
| 14020296  | 2.90                  | 3                        | 3.20                  | 3                        | 3.07                  | 3                        | 3.05                  | 3                        |
| 14020300  | 2.83                  | 3                        | 2.94                  | 3                        | 2.97                  | 3                        | 2.91                  | 3                        |
| 14020301  | 0.55                  | 1                        | 0.67                  | 1                        | 0.58                  | 1                        | 0.60                  | 1                        |
| 14020302  | 1.25                  | 1                        | 1.22                  | 1                        | 1.27                  | 1                        | 1.25                  | 1                        |
| 14020303  | 2.03                  | 2                        | 2.10                  | 2                        | 2.36                  | 2                        | 2.16                  | 2                        |

| Sample ID | Copy Number           |                          |                       |                          |                       |                          |                       |                          |
|-----------|-----------------------|--------------------------|-----------------------|--------------------------|-----------------------|--------------------------|-----------------------|--------------------------|
|           | r = 1                 |                          | r = 2                 |                          | r = 3                 |                          | Average               |                          |
|           | Ratio<br>(target/ref) | Estimated<br>Copy Number |
| 14020304  | 0.99                  | 1                        | 1.12                  | 1                        | 1.21                  | 1                        | 1.11                  | 1                        |
| 14020305  | 1.18                  | 1                        | 1.27                  | 1                        | 1.34                  | 1                        | 1.26                  | 1                        |
| 14020309  | 2.21                  | 2                        | 3.07                  | 3                        | 2.61                  | 3                        | 2.63                  | 3                        |
| 14020310  | 1.46                  | 1                        | 1.50                  | 1                        | 1.42                  | 1                        | 1.46                  | 1                        |
| 14020311  | 5.09                  | 5                        | 5.73                  | 6                        | 5.89                  | 6                        | 5.57                  | 6                        |
| 14020319  | 4.25                  | 4                        | 3.53                  | 4                        | 4.15                  | 4                        | 3.98                  | 4                        |
| 14020320  | 4.06                  | 4                        | 4.05                  | 4                        | 3.48                  | 3                        | 3.86                  | 4                        |
| 14020321  | 3.86                  | 4                        | 3.84                  | 4                        | 3.43                  | 3                        | 3.71                  | 4                        |
| 14020322  | 2.16                  | 2                        | 2.01                  | 2                        | 2.49                  | 2                        | 2.22                  | 2                        |
| 14020323  | 2.03                  | 2                        | 2.13                  | 2                        | 2.37                  | 2                        | 2.18                  | 2                        |
| 14020325  | 2.60                  | 3                        | 2.59                  | 3                        | 2.29                  | 2                        | 2.49                  | 2                        |
| 14020326  | 2.90                  | 3                        | 2.96                  | 3                        | 1.54                  | 2                        | 2.47                  | 2                        |
| 14020328  | 1.13                  | 1                        | 1.21                  | 1                        | 0.78                  | 1                        | 1.04                  | 1                        |
| 14020330  | 2.12                  | 2                        | 1.51                  | 2                        | 1.97                  | 2                        | 1.87                  | 2                        |
| 14020331  | 0.63                  | 1                        | 0.69                  | 1                        | 0.61                  | 1                        | 0.64                  | 1                        |
| 14020337  | 0.96                  | 1                        | 0.82                  | 1                        | 0.72                  | 1                        | 0.83                  | 1                        |
| 14020339  | 2.62                  | 3                        | 2.49                  | 2                        | 2.55                  | 3                        | 2.55                  | 3                        |
| 14020340  | 0.08                  | 0                        | 0.08                  | 0                        | 0.05                  | 0                        | 0.07                  | 0                        |
| 14020341  | 1.56                  | 2                        | 1.77                  | 2                        | 1.64                  | 2                        | 1.66                  | 2                        |

| Sample ID | Copy Number           |                          |                       |                          |                       |                          |                       |                          |
|-----------|-----------------------|--------------------------|-----------------------|--------------------------|-----------------------|--------------------------|-----------------------|--------------------------|
|           | r = 1                 |                          | r = 2                 |                          | r = 3                 |                          | Average               |                          |
|           | Ratio<br>(target/ref) | Estimated<br>Copy Number |
| 14020342  | 2.16                  | 2                        | 2.38                  | 2                        | 2.15                  | 2                        | 2.23                  | 2                        |
| 14020350  | 1.78                  | 2                        | 1.75                  | 2                        | 1.78                  | 2                        | 1.77                  | 2                        |
| 14020357  | 8.58                  | 9                        | 7.45                  | 7                        | 7.48                  | 7                        | 7.84                  | 8                        |
| 14020377  | 3.99                  | 4                        | 2.75                  | 3                        | 2.92                  | 3                        | 3.22                  | 3                        |
| 14020383  | 2.10                  | 2                        | 2.00                  | 2                        | 2.37                  | 2                        | 2.16                  | 2                        |
| 14020385  | 2.83                  | 3                        | 2.48                  | 2                        | 2.86                  | 3                        | 2.72                  | 3                        |
| 14020391  | 1.24                  | 1                        | 1.16                  | 1                        | 1.12                  | 1                        | 1.17                  | 1                        |
| 14020401  | 1.16                  | 1                        | 1.31                  | 1                        | 1.05                  | 1                        | 1.17                  | 1                        |
| 14020402  | 7.09                  | 7                        | 7.25                  | 7                        | 8.02                  | 8                        | 7.46                  | 7                        |
| 14020404  | 4.20                  | 4                        | 4.11                  | 4                        | 4.48                  | 4                        | 4.26                  | 4                        |
| 14020406  | 1.98                  | 2                        | 2.10                  | 2                        | 2.02                  | 2                        | 2.03                  | 2                        |
| 14020407  | 3.67                  | 4                        | 3.57                  | 4                        | 4.15                  | 4                        | 3.80                  | 4                        |
| 14020408  | 1.04                  | 1                        | 1.02                  | 1                        | 1.42                  | 1                        | 1.16                  | 1                        |
| 14020411  | 1.16                  | 1                        | 1.07                  | 1                        | 1.02                  | 1                        | 1.08                  | 1                        |
| 14020412  | 1.79                  | 2                        | 1.94                  | 2                        | 1.70                  | 2                        | 1.81                  | 2                        |
| 14020413  | 2.24                  | 2                        | 2.21                  | 2                        | 2.30                  | 2                        | 2.25                  | 2                        |
| 14020414  | 1.92                  | 2                        | 1.81                  | 2                        | 1.97                  | 2                        | 1.90                  | 2                        |
| 14020415  | 1.65                  | 2                        | 1.50                  | 2                        | 1.75                  | 2                        | 1.64                  | 2                        |
| 14020428  | 2.79                  | 3                        | 2.86                  | 3                        | 3.01                  | 3                        | 2.89                  | 3                        |

| Sample ID | Copy Number           |                          |                       |                          |                       |                          |                       |                          |
|-----------|-----------------------|--------------------------|-----------------------|--------------------------|-----------------------|--------------------------|-----------------------|--------------------------|
|           | r = 1                 |                          | r = 2                 |                          | r = 3                 |                          | Average               |                          |
|           | Ratio<br>(target/ref) | Estimated<br>Copy Number |
| 14020429  | 2.66                  | 3                        | 2.79                  | 3                        | 3.20                  | 3                        | 2.89                  | 3                        |
| 14020432  | 1.04                  | 1                        | 1.13                  | 1                        | 0.86                  | 1                        | 1.01                  | 1                        |
| 14020434  | 3.32                  | 3                        | 3.66                  | 4                        | 3.50                  | 4                        | 3.50                  | 3                        |
| 14020436  | 2.67                  | 3                        | 2.62                  | 3                        | 2.54                  | 3                        | 2.61                  | 3                        |
| 14020437  | 2.77                  | 3                        | 2.57                  | 3                        | 2.32                  | 2                        | 2.56                  | 3                        |
| 14020438  | 2.39                  | 2                        | 2.26                  | 2                        | 2.04                  | 2                        | 2.23                  | 2                        |
| 14020439  | 2.20                  | 2                        | 2.08                  | 2                        | 1.79                  | 2                        | 2.02                  | 2                        |
| 14020440  | 4.97                  | 5                        | 4.26                  | 4                        | 4.17                  | 4                        | 4.47                  | 4                        |
| 14020443  | 0.80                  | 1                        | 0.80                  | 1                        | 0.85                  | 1                        | 0.82                  | 1                        |
| 14020444  | 1.43                  | 1                        | 1.08                  | 1                        | 1.11                  | 1                        | 1.21                  | 1                        |
| 14020448  | 1.79                  | 2                        | 1.96                  | 2                        | 1.82                  | 2                        | 1.86                  | 2                        |
| 14020451  | 4.63                  | 5                        | 4.94                  | 5                        | 4.35                  | 4                        | 4.64                  | 5                        |
| 14020452  | 2.15                  | 2                        | 2.22                  | 2                        | 2.30                  | 2                        | 2.22                  | 2                        |
| 14020458  | 3.05                  | 3                        | 3.04                  | 3                        | 2.81                  | 3                        | 2.97                  | 3                        |
| 14020464  | 1.89                  | 2                        | 1.66                  | 2                        | 1.84                  | 2                        | 1.80                  | 2                        |
| 14020465  | 2.12                  | 2                        | 1.92                  | 2                        | 2.03                  | 2                        | 2.02                  | 2                        |
| 14020470  | 1.95                  | 2                        | 1.86                  | 2                        | 2.04                  | 2                        | 1.95                  | 2                        |
| 14020471  | 2.82                  | 3                        | 2.23                  | 2                        | 2.56                  | 3                        | 2.54                  | 3                        |
| 14020473  | 1.54                  | 2                        | 1.62                  | 2                        | 1.84                  | 2                        | 1.67                  | 2                        |

| Sample ID | Copy Number           |                          |                       |                          |                       |                          |                       |                          |
|-----------|-----------------------|--------------------------|-----------------------|--------------------------|-----------------------|--------------------------|-----------------------|--------------------------|
|           | r = 1                 |                          | r = 2                 |                          | r = 3                 |                          | Average               |                          |
|           | Ratio<br>(target/ref) | Estimated<br>Copy Number |
| 14020474  | 0.34                  | 0                        | 0.36                  | 0                        | 0.37                  | 0                        | 0.36                  | 0                        |
| 14020475  | 1.28                  | 1                        | 1.19                  | 1                        | 1.13                  | 1                        | 1.20                  | 1                        |
| 14020476  | 1.81                  | 2                        | 1.86                  | 2                        | 1.83                  | 2                        | 1.84                  | 2                        |
| 14020477  | 0.73                  | 1                        | 0.76                  | 1                        | 0.72                  | 1                        | 0.73                  | 1                        |
| 14020481  | 20.17                 | 20                       | 24.02                 | 24                       | 23.03                 | 23                       | 22.41                 | 22                       |
| 14020489  | 0.00                  | 0                        | 0.00                  | 0                        | 0.00                  | 0                        | 0.00                  | 0                        |
| 14020490  | 3.29                  | 3                        | 3.07                  | 3                        | 3.01                  | 3                        | 3.12                  | 3                        |
| 14020491  | 3.41                  | 3                        | 3.81                  | 4                        | 3.92                  | 4                        | 3.71                  | 4                        |
| 14020492  | 7.84                  | 8                        | 7.52                  | 8                        | 8.72                  | 9                        | 8.03                  | 8                        |
| 14020495  | 0.93                  | 1                        | 0.96                  | 1                        | 1.06                  | 1                        | 0.98                  | 1                        |
| 14020502  | 1.20                  | 1                        | 1.16                  | 1                        | 1.39                  | 1                        | 1.25                  | 1                        |
| 14020503  | 6.58                  | 7                        | 5.48                  | 5                        | 5.87                  | 6                        | 5.97                  | 6                        |
| 14020504  | 2.81                  | 3                        | 3.75                  | 4                        | 3.46                  | 3                        | 3.34                  | 3                        |
| 14020505  | 3.48                  | 3                        | 2.56                  | 3                        | 2.88                  | 3                        | 2.97                  | 3                        |
| 14020507  | 2.66                  | 3                        | 2.66                  | 3                        | 3.02                  | 3                        | 2.78                  | 3                        |
| 14020510  | 2.13                  | 2                        | 2.03                  | 2                        | 1.79                  | 2                        | 1.98                  | 2                        |
| 14020511  | 2.05                  | 2                        | 2.13                  | 2                        | 1.82                  | 2                        | 2.00                  | 2                        |
| 14020512  | 3.80                  | 4                        | 3.69                  | 4                        | 4.99                  | 5                        | 4.16                  | 4                        |
| 14020514  | 2.22                  | 2                        | 2.07                  | 2                        | 1.86                  | 2                        | 2.05                  | 2                        |

| Sample ID | Copy Number           |                          |                       |                          |                       |                          |                       |                          |
|-----------|-----------------------|--------------------------|-----------------------|--------------------------|-----------------------|--------------------------|-----------------------|--------------------------|
|           | r = 1                 |                          | r = 2                 |                          | r = 3                 |                          | Average               |                          |
|           | Ratio<br>(target/ref) | Estimated<br>Copy Number |
| 14020515  | 1.16                  | 1                        | 1.15                  | 1                        | 1.52                  | 2                        | 1.28                  | 1                        |
| 14020516  | 2.19                  | 2                        | 2.33                  | 2                        | 3.04                  | 3                        | 2.52                  | 3                        |
| 14020517  | 1.81                  | 2                        | 1.94                  | 2                        | 1.54                  | 2                        | 1.76                  | 2                        |
| 14020518  | 2.54                  | 3                        | 2.81                  | 3                        | 2.59                  | 3                        | 2.65                  | 3                        |
| 14020522  | 1.22                  | 1                        | 1.15                  | 1                        | 1.16                  | 1                        | 1.18                  | 1                        |
| 14020523  | 1.03                  | 1                        | 1.00                  | 1                        | 1.12                  | 1                        | 1.05                  | 1                        |
| 14020524  | 1.10                  | 1                        | 1.24                  | 1                        | 1.13                  | 1                        | 1.16                  | 1                        |
| 14020525  | 0.95                  | 1                        | 1.11                  | 1                        | 1.09                  | 1                        | 1.05                  | 1                        |
| 14020528  | 1.97                  | 2                        | 2.30                  | 2                        | 2.25                  | 2                        | 2.17                  | 2                        |
| 14020537  | 0.98                  | 1                        | 1.14                  | 1                        | 1.02                  | 1                        | 1.05                  | 1                        |
| 14020538  | 1.85                  | 2                        | 2.17                  | 2                        | 1.74                  | 2                        | 1.92                  | 2                        |
| 14020541  | 2.86                  | 3                        | 2.54                  | 3                        | 2.65                  | 3                        | 2.68                  | 3                        |
| 14020545  | 3.86                  | 4                        | 4.28                  | 4                        | 3.93                  | 4                        | 4.02                  | 4                        |
| 14020546  | 1.04                  | 1                        | 1.04                  | 1                        | 1.32                  | 1                        | 1.13                  | 1                        |
| 14020547  | 6.92                  | 7                        | 6.71                  | 7                        | 7.88                  | 8                        | 7.17                  | 7                        |
| 14020548  | 1.82                  | 2                        | 2.47                  | 2                        | 1.77                  | 2                        | 2.02                  | 2                        |
| 14020551  | 1.05                  | 1                        | 1.16                  | 1                        | 1.08                  | 1                        | 1.10                  | 1                        |
| 14020552  | 2.15                  | 2                        | 1.93                  | 2                        | 1.89                  | 2                        | 1.99                  | 2                        |
| 14020553  | 2.47                  | 2                        | 2.51                  | 3                        | 2.65                  | 3                        | 2.54                  | 3                        |

| Sample ID | Copy Number           |                          |                       |                          |                       |                          |                       |                          |
|-----------|-----------------------|--------------------------|-----------------------|--------------------------|-----------------------|--------------------------|-----------------------|--------------------------|
|           | r = 1                 |                          | r = 2                 |                          | r = 3                 |                          | Average               |                          |
|           | Ratio<br>(target/ref) | Estimated<br>Copy Number |
| 14020554  | 4.82                  | 5                        | 4.59                  | 5                        | 4.55                  | 5                        | 4.65                  | 5                        |
| 14020560  | 1.97                  | 2                        | 2.03                  | 2                        | 1.99                  | 2                        | 2.00                  | 2                        |
| 14020566  | 5.92                  | 6                        | 5.36                  | 5                        | 4.80                  | 5                        | 5.36                  | 5                        |
| 14020567  | 2.14                  | 2                        | 2.00                  | 2                        | 2.02                  | 2                        | 2.06                  | 2                        |
| 14020573  | 0.88                  | 1                        | 0.88                  | 1                        | 1.03                  | 1                        | 0.93                  | 1                        |
| 14020575  | 1.14                  | 1                        | 1.12                  | 1                        | 1.13                  | 1                        | 1.13                  | 1                        |
| 14020584  | 1.34                  | 1                        | 1.13                  | 1                        | 1.28                  | 1                        | 1.25                  | 1                        |
| 14020585  | 1.28                  | 1                        | 1.06                  | 1                        | 1.25                  | 1                        | 1.20                  | 1                        |
| 14020590  | 1.37                  | 1                        | 1.49                  | 1                        | 1.49                  | 1                        | 1.45                  | 1                        |
| 14020597  | 1.22                  | 1                        | 1.25                  | 1                        | 1.25                  | 1                        | 1.24                  | 1                        |
| 14020598  | 1.15                  | 1                        | 1.19                  | 1                        | 1.15                  | 1                        | 1.16                  | 1                        |
| 14020601  | 3.72                  | 4                        | 3.50                  | 4                        | 3.62                  | 4                        | 3.61                  | 4                        |
| 14020603  | 1.07                  | 1                        | 1.04                  | 1                        | 1.00                  | 1                        | 1.04                  | 1                        |
| 14020604  | 1.09                  | 1                        | 1.08                  | 1                        | 1.12                  | 1                        | 1.10                  | 1                        |
| 14020606  | 1.23                  | 1                        | 1.21                  | 1                        | 1.35                  | 1                        | 1.26                  | 1                        |
| 14020607  | 1.17                  | 1                        | 1.45                  | 1                        | 1.39                  | 1                        | 1.33                  | 1                        |
| 14020608  | 1.36                  | 1                        | 1.40                  | 1                        | 1.15                  | 1                        | 1.30                  | 1                        |
| 14020609  | 1.24                  | 1                        | 1.21                  | 1                        | 1.13                  | 1                        | 1.19                  | 1                        |
| 14020610  | 2.09                  | 2                        | 2.02                  | 2                        | 2.08                  | 2                        | 2.07                  | 2                        |



| Sample ID | Copy Number           |                          |                       |                          |                       |                          |                       |                          |
|-----------|-----------------------|--------------------------|-----------------------|--------------------------|-----------------------|--------------------------|-----------------------|--------------------------|
|           | r = 1                 |                          | r = 2                 |                          | r = 3                 |                          | Average               |                          |
|           | Ratio<br>(target/ref) | Estimated<br>Copy Number |
| 14020611  | 1.18                  | 1                        | 1.19                  | 1                        | 1.02                  | 1                        | 1.13                  | 1                        |
| 14020612  | 1.32                  | 1                        | 1.26                  | 1                        | 1.25                  | 1                        | 1.27                  | 1                        |
| 14020616  | 1.16                  | 1                        | 1.28                  | 1                        | 1.14                  | 1                        | 1.19                  | 1                        |
| 14020619  | 1.16                  | 1                        | 1.16                  | 1                        | 1.14                  | 1                        | 1.16                  | 1                        |
| 14020621  | 2.32                  | 2                        | 2.20                  | 2                        | 2.18                  | 2                        | 2.23                  | 2                        |
| 14020624  | 2.31                  | 2                        | 2.10                  | 2                        | 1.93                  | 2                        | 2.11                  | 2                        |
| 14020628  | 1.22                  | 1                        | 1.31                  | 1                        | 1.16                  | 1                        | 1.23                  | 1                        |
| 14020630  | 1.18                  | 1                        | 1.18                  | 1                        | 1.29                  | 1                        | 1.22                  | 1                        |
| 14020632  | 11.31                 | 11                       | 12.00                 | 12                       | 13.31                 | 13                       | 12.21                 | 12                       |
| 14020636  | 1.82                  | 2                        | 1.80                  | 2                        | 1.88                  | 2                        | 1.83                  | 2                        |
| 14020638  | 1.09                  | 1                        | 0.99                  | 1                        | 1.05                  | 1                        | 1.04                  | 1                        |
| 14020644  | 1.20                  | 1                        | 1.46                  | 1                        | 1.27                  | 1                        | 1.31                  | 1                        |
| 14020645  | 1.49                  | 1                        | 1.32                  | 1                        | 1.20                  | 1                        | 1.34                  | 1                        |
| 14020646  | 1.08                  | 1                        | 1.27                  | 1                        | 1.16                  | 1                        | 1.17                  | 1                        |
| 14020647  | 2.84                  | 3                        | 3.41                  | 3                        | 3.28                  | 3                        | 3.18                  | 3                        |
| 14020649  | 6.40                  | 6                        | 6.06                  | 6                        | 5.74                  | 6                        | 6.06                  | 6                        |
| 14020663  | 6.80                  | 7                        | 6.39                  | 6                        | 6.59                  | 7                        | 6.59                  | 7                        |
| 14020666  | 2.13                  | 2                        | 1.99                  | 2                        | 2.04                  | 2                        | 2.05                  | 2                        |
| 14020667  | 1.10                  | 1                        | 1.10                  | 1                        | 1.08                  | 1                        | 1.09                  | 1                        |

| Sample ID | Copy Number           |                          |                       |                          |                       |                          |                       |                          |
|-----------|-----------------------|--------------------------|-----------------------|--------------------------|-----------------------|--------------------------|-----------------------|--------------------------|
|           | r = 1                 |                          | r = 2                 |                          | r = 3                 |                          | Average               |                          |
|           | Ratio<br>(target/ref) | Estimated<br>Copy Number |
| 14020668  | 1.02                  | 1                        | 0.95                  | 1                        | 1.02                  | 1                        | 1.00                  | 1                        |
| 14020672  | 2.88                  | 3                        | 2.58                  | 3                        | 2.65                  | 3                        | 2.70                  | 3                        |
| 14020675  | 1.22                  | 1                        | 1.18                  | 1                        | 1.18                  | 1                        | 1.19                  | 1                        |
| 14020678  | 1.10                  | 1                        | 1.04                  | 1                        | 1.05                  | 1                        | 1.06                  | 1                        |
| 14020679  | 1.00                  | 1                        | 1.05                  | 1                        | 1.10                  | 1                        | 1.05                  | 1                        |
| 14020682  | 7.27                  | 7                        | 7.00                  | 7                        | 7.57                  | 8                        | 7.28                  | 7                        |
| 14020683  | 1.05                  | 1                        | 1.15                  | 1                        | 1.10                  | 1                        | 1.10                  | 1                        |
| 14020684  | 2.04                  | 2                        | 2.46                  | 2                        | 2.44                  | 2                        | 2.31                  | 2                        |
| 14020685  | 2.20                  | 2                        | 2.10                  | 2                        | 2.46                  | 2                        | 2.25                  | 2                        |
| 14020686  | 1.00                  | 1                        | 0.90                  | 1                        | 0.99                  | 1                        | 0.96                  | 1                        |
| 14020687  | 1.18                  | 1                        | 1.21                  | 1                        | 1.38                  | 1                        | 1.26                  | 1                        |
| 14020692  | 3.25                  | 3                        | 3.30                  | 3                        | 3.45                  | 3                        | 3.33                  | 3                        |
| 14020694  | 1.00                  | 1                        | 0.96                  | 1                        | 1.00                  | 1                        | 0.98                  | 1                        |
| 14020695  | 1.11                  | 1                        | 1.04                  | 1                        | 0.98                  | 1                        | 1.04                  | 1                        |
| 14020698  | 2.04                  | 2                        | 2.09                  | 2                        | 2.15                  | 2                        | 2.09                  | 2                        |
| 14020700  | 1.07                  | 1                        | 1.20                  | 1                        | 1.00                  | 1                        | 1.09                  | 1                        |
| 14020701  | 1.16                  | 1                        | 1.37                  | 1                        | 1.04                  | 1                        | 1.19                  | 1                        |
| 14020703  | 3.56                  | 4                        | 3.60                  | 4                        | 3.57                  | 4                        | 3.58                  | 4                        |
| 14020704  | 1.25                  | 1                        | 1.16                  | 1                        | 1.25                  | 1                        | 1.22                  | 1                        |

| Sample ID | Copy Number           |                          |                       |                          |                       |                          |                       |                          |
|-----------|-----------------------|--------------------------|-----------------------|--------------------------|-----------------------|--------------------------|-----------------------|--------------------------|
|           | r = 1                 |                          | r = 2                 |                          | r = 3                 |                          | Average               |                          |
|           | Ratio<br>(target/ref) | Estimated<br>Copy Number |
| 14020706  | 3.70                  | 4                        | 4.04                  | 4                        | 3.41                  | 3                        | 3.72                  | 4                        |
| 14020711  | 2.99                  | 3                        | 2.83                  | 3                        | 2.44                  | 2                        | 2.75                  | 3                        |
| 14020719  | 1.58                  | 2                        | 1.63                  | 2                        | 1.63                  | 2                        | 1.61                  | 2                        |
| 14020720  | 1.86                  | 2                        | 2.35                  | 2                        | 2.15                  | 2                        | 2.12                  | 2                        |
| 14020722  | 1.11                  | 1                        | 1.14                  | 1                        | 1.14                  | 1                        | 1.13                  | 1                        |
| 14020724  | 1.42                  | 1                        | 1.30                  | 1                        | 1.42                  | 1                        | 1.38                  | 1                        |
| 14020727  | 1.20                  | 1                        | 1.24                  | 1                        | 1.21                  | 1                        | 1.22                  | 1                        |
| 14020732  | 1.33                  | 1                        | 1.27                  | 1                        | 1.31                  | 1                        | 1.31                  | 1                        |
| 14020740  | 1.17                  | 1                        | 1.13                  | 1                        | 1.25                  | 1                        | 1.18                  | 1                        |
| 14020743  | 1.39                  | 1                        | 1.33                  | 1                        | 1.36                  | 1                        | 1.36                  | 1                        |
| 14020745  | 0.78                  | 1                        | 0.66                  | 1                        | 0.66                  | 1                        | 0.70                  | 1                        |
| 14020746  | 3.74                  | 4                        | 3.74                  | 4                        | 3.55                  | 4                        | 3.68                  | 4                        |
| 14020751  | 2.08                  | 2                        | 2.06                  | 2                        | 2.06                  | 2                        | 2.07                  | 2                        |
| 14020754  | 1.04                  | 1                        | 1.10                  | 1                        | 1.14                  | 1                        | 1.09                  | 1                        |
| 14020755  | 1.21                  | 1                        | 1.34                  | 1                        | 1.31                  | 1                        | 1.29                  | 1                        |
| 14020756  | 1.28                  | 1                        | 1.45                  | 1                        | 1.35                  | 1                        | 1.36                  | 1                        |
| 14020757  | 1.13                  | 1                        | 1.19                  | 1                        | 1.28                  | 1                        | 1.20                  | 1                        |
| 14020758  | 1.31                  | 1                        | 1.13                  | 1                        | 1.14                  | 1                        | 1.19                  | 1                        |
| 14020771  | 1.18                  | 1                        | 1.17                  | 1                        | 1.07                  | 1                        | 1.14                  | 1                        |

| Sample ID | Copy Number           |                          |                       |                          |                       |                          |                       |                          |
|-----------|-----------------------|--------------------------|-----------------------|--------------------------|-----------------------|--------------------------|-----------------------|--------------------------|
|           | r = 1                 |                          | r = 2                 |                          | r = 3                 |                          | Average               |                          |
|           | Ratio<br>(target/ref) | Estimated<br>Copy Number |
| 14020772  | 2.60                  | 3                        | 2.67                  | 3                        | 2.82                  | 3                        | 2.70                  | 3                        |
| 14020774  | 1.34                  | 1                        | 1.13                  | 1                        | 1.12                  | 1                        | 1.20                  | 1                        |
| 14020776  | 2.19                  | 2                        | 2.19                  | 2                        | 2.20                  | 2                        | 2.19                  | 2                        |
| 14020778  | 6.12                  | 6                        | 7.75                  | 8                        | 6.56                  | 7                        | 6.81                  | 7                        |
| 14020780  | 0.13                  | 0                        | 0.14                  | 0                        | 0.15                  | 0                        | 0.14                  | 0                        |
| 14020782  | 1.08                  | 1                        | 1.38                  | 1                        | 1.64                  | 2                        | 1.37                  | 1                        |
| 14020784  | 3.31                  | 3                        | 3.38                  | 3                        | 3.28                  | 3                        | 3.32                  | 3                        |
| 14020785  | 2.41                  | 2                        | 2.85                  | 3                        | 2.61                  | 3                        | 2.63                  | 3                        |
| 14020787  | 1.33                  | 1                        | 1.24                  | 1                        | 1.62                  | 2                        | 1.40                  | 1                        |
| 14020800  | 3.95                  | 4                        | 4.22                  | 4                        | 3.77                  | 4                        | 3.98                  | 4                        |
| 14020801  | 2.63                  | 3                        | 2.52                  | 3                        | 2.75                  | 3                        | 2.63                  | 3                        |
| 14020802  | 1.44                  | 1                        | 1.39                  | 1                        | 1.35                  | 1                        | 1.39                  | 1                        |
| 14020805  | 1.90                  | 2                        | 1.87                  | 2                        | 1.94                  | 2                        | 1.90                  | 2                        |
| 14020812  | 1.00                  | 1                        | 1.28                  | 1                        | 1.10                  | 1                        | 1.13                  | 1                        |
| 14020814  | 1.29                  | 1                        | 1.09                  | 1                        | 1.29                  | 1                        | 1.22                  | 1                        |
| 14020815  | 1.19                  | 1                        | 1.04                  | 1                        | 1.20                  | 1                        | 1.14                  | 1                        |
| 14020816  | 1.60                  | 2                        | 1.71                  | 2                        | 1.64                  | 2                        | 1.65                  | 2                        |
| 14020817  | 1.30                  | 1                        | 1.43                  | 1                        | 1.55                  | 2                        | 1.43                  | 1                        |
| 14020821  | 1.31                  | 1                        | 1.39                  | 1                        | 1.41                  | 1                        | 1.37                  | 1                        |

| Sample ID | Copy Number           |                          |                       |                          |                       |                          |                       |                          |
|-----------|-----------------------|--------------------------|-----------------------|--------------------------|-----------------------|--------------------------|-----------------------|--------------------------|
|           | r = 1                 |                          | r = 2                 |                          | r = 3                 |                          | Average               |                          |
|           | Ratio<br>(target/ref) | Estimated<br>Copy Number |
| 14020823  | 0.90                  | 1                        | 0.83                  | 1                        | 0.82                  | 1                        | 0.85                  | 1                        |
| 14020824  | 3.10                  | 3                        | 2.92                  | 3                        | 3.02                  | 3                        | 3.01                  | 3                        |
| 14020828  | 2.08                  | 2                        | 2.39                  | 2                        | 2.35                  | 2                        | 2.27                  | 2                        |
| 14020831  | 1.23                  | 1                        | 1.14                  | 1                        | 1.36                  | 1                        | 1.24                  | 1                        |
| 14020834  | 1.43                  | 1                        | 1.64                  | 2                        | 1.41                  | 1                        | 1.49                  | 1                        |
| 14020836  | 1.69                  | 2                        | 1.69                  | 2                        | 1.66                  | 2                        | 1.68                  | 2                        |
| 14020837  | 1.51                  | 2                        | 1.56                  | 2                        | 1.38                  | 1                        | 1.48                  | 1                        |
| 14020838  | 1.31                  | 1                        | 1.27                  | 1                        | 1.32                  | 1                        | 1.30                  | 1                        |
| 14020839  | 1.22                  | 1                        | 1.26                  | 1                        | 1.17                  | 1                        | 1.22                  | 1                        |
| 14020844  | 2.71                  | 3                        | 2.72                  | 3                        | 2.66                  | 3                        | 2.70                  | 3                        |
| 14020845  | 1.30                  | 1                        | 1.16                  | 1                        | 1.23                  | 1                        | 1.23                  | 1                        |
| 14020846  | 2.38                  | 2                        | 2.14                  | 2                        | 2.41                  | 2                        | 2.31                  | 2                        |
| 14020849  | 5.49                  | 5                        | 4.84                  | 5                        | 5.81                  | 6                        | 5.38                  | 5                        |
| 14020850  | 1.32                  | 1                        | 1.22                  | 1                        | 1.85                  | 2                        | 1.46                  | 1                        |
| 14020851  | 3.70                  | 4                        | 3.44                  | 3                        | 3.58                  | 4                        | 3.57                  | 4                        |
| 14020853  | 2.19                  | 2                        | 2.14                  | 2                        | 2.45                  | 2                        | 2.26                  | 2                        |
| 14020854  | 1.64                  | 2                        | 1.87                  | 2                        | 1.79                  | 2                        | 1.77                  | 2                        |
| 14020859  | 1.92                  | 2                        | 2.32                  | 2                        | 2.26                  | 2                        | 2.17                  | 2                        |
| 14020862  | 1.54                  | 2                        | 1.28                  | 1                        | 1.38                  | 1                        | 1.40                  | 1                        |

| Sample ID | Copy Number           |                          |                       |                          |                       |                          |                       |                          |
|-----------|-----------------------|--------------------------|-----------------------|--------------------------|-----------------------|--------------------------|-----------------------|--------------------------|
|           | r = 1                 |                          | r = 2                 |                          | r = 3                 |                          | Average               |                          |
|           | Ratio<br>(target/ref) | Estimated<br>Copy Number |
| 14020865  | 1.39                  | 1                        | 1.38                  | 1                        | 1.43                  | 1                        | 1.40                  | 1                        |
| 14020866  | 3.11                  | 3                        | 3.14                  | 3                        | 3.00                  | 3                        | 3.08                  | 3                        |
| 14020868  | 1.43                  | 1                        | 1.56                  | 2                        | 1.80                  | 2                        | 1.60                  | 2                        |
| 14020869  | 1.05                  | 1                        | 1.00                  | 1                        | 1.08                  | 1                        | 1.04                  | 1                        |
| 14020873  | 1.32                  | 1                        | 2.16                  | 2                        | 2.42                  | 2                        | 1.96                  | 2                        |
| 14020875  | 3.36                  | 3                        | 3.68                  | 4                        | 3.27                  | 3                        | 3.44                  | 3                        |
| 14020876  | 2.78                  | 3                        | 2.84                  | 3                        | 2.93                  | 3                        | 2.85                  | 3                        |
| 14020878  | 1.37                  | 1                        | 1.42                  | 1                        | 1.32                  | 1                        | 1.37                  | 1                        |
| 14020887  | 0.10                  | 0                        | 0.13                  | 0                        | 0.10                  | 0                        | 0.11                  | 0                        |
| 14020891  | 3.15                  | 3                        | 3.21                  | 3                        | 3.50                  | 4                        | 3.29                  | 3                        |
| 14020892  | 1.53                  | 2                        | 1.75                  | 2                        | 1.82                  | 2                        | 1.70                  | 2                        |
| 14020893  | 2.31                  | 2                        | 1.98                  | 2                        | 2.17                  | 2                        | 2.15                  | 2                        |
| 14020894  | 4.31                  | 4                        | 4.68                  | 5                        | 4.75                  | 5                        | 4.58                  | 5                        |
| 14020896  | 3.98                  | 4                        | 4.00                  | 4                        | 4.39                  | 4                        | 4.12                  | 4                        |
| 14020898  | 1.49                  | 1                        | 1.46                  | 1                        | 1.21                  | 1                        | 1.39                  | 1                        |
| 14020899  | 4.81                  | 5                        | 5.18                  | 5                        | 5.13                  | 5                        | 5.04                  | 5                        |
| 14020900  | 4.20                  | 4                        | 4.29                  | 4                        | 4.84                  | 5                        | 4.44                  | 4                        |
| 14020903  | 2.85                  | 3                        | 2.78                  | 3                        | 2.61                  | 3                        | 2.75                  | 3                        |
| 14020904  | 1.59                  | 2                        | 1.51                  | 2                        | 1.36                  | 1                        | 1.48                  | 1                        |

| Sample ID | Copy Number           |                          |                       |                          |                       |                          |                       |                          |
|-----------|-----------------------|--------------------------|-----------------------|--------------------------|-----------------------|--------------------------|-----------------------|--------------------------|
|           | r = 1                 |                          | r = 2                 |                          | r = 3                 |                          | Average               |                          |
|           | Ratio<br>(target/ref) | Estimated<br>Copy Number |
| 14020905  | 1.34                  | 1                        | 2.10                  | 2                        | 1.54                  | 2                        | 1.66                  | 2                        |
| 14020906  | 1.57                  | 2                        | 1.51                  | 2                        | 1.48                  | 1                        | 1.52                  | 2                        |
| 14020908  | 2.00                  | 2                        | 1.81                  | 2                        | 1.93                  | 2                        | 1.92                  | 2                        |
| 14020917  | 3.35                  | 3                        | 3.14                  | 3                        | 3.20                  | 3                        | 3.23                  | 3                        |
| 14020925  | 0.90                  | 1                        | 1.18                  | 1                        | 1.06                  | 1                        | 1.05                  | 1                        |
| 14020929  | 3.97                  | 4                        | 3.93                  | 4                        | 3.50                  | 4                        | 3.80                  | 4                        |
| 14020934  | 2.74                  | 3                        | 2.66                  | 3                        | 2.60                  | 3                        | 2.66                  | 3                        |
| 14020935  | 1.39                  | 1                        | 1.26                  | 1                        | 1.33                  | 1                        | 1.33                  | 1                        |
| 14020940  | 0.78                  | 1                        | 0.78                  | 1                        | 0.76                  | 1                        | 0.78                  | 1                        |
| 14020942  | 3.00                  | 3                        | 3.00                  | 3                        | 3.50                  | 3                        | 3.16                  | 3                        |
| 14020945  | 1.93                  | 2                        | 2.03                  | 2                        | 1.67                  | 2                        | 1.88                  | 2                        |
| 14020958  | 0.93                  | 1                        | 1.11                  | 1                        | 1.05                  | 1                        | 1.03                  | 1                        |
| 14020961  | 3.14                  | 3                        | 2.76                  | 3                        | 3.00                  | 3                        | 2.97                  | 3                        |
| 14020968  | 3.28                  | 3                        | 2.90                  | 3                        | 3.18                  | 3                        | 3.12                  | 3                        |
| 14020970  | 4.07                  | 4                        | 4.30                  | 4                        | 3.85                  | 4                        | 4.07                  | 4                        |
| 14020972  | 0.99                  | 1                        | 0.99                  | 1                        | 0.94                  | 1                        | 0.97                  | 1                        |
| 14020975  | 0.81                  | 1                        | 0.80                  | 1                        | 0.91                  | 1                        | 0.84                  | 1                        |
| 14020977  | 5.11                  | 5                        | 4.63                  | 5                        | 4.75                  | 5                        | 4.83                  | 5                        |
| 14020981  | 1.56                  | 2                        | 1.64                  | 2                        | 1.65                  | 2                        | 1.62                  | 2                        |

| Sample ID | Copy Number           |                          |                       |                          |                       |                          |                       |                          |
|-----------|-----------------------|--------------------------|-----------------------|--------------------------|-----------------------|--------------------------|-----------------------|--------------------------|
|           | r = 1                 |                          | r = 2                 |                          | r = 3                 |                          | Average               |                          |
|           | Ratio<br>(target/ref) | Estimated<br>Copy Number |
| 14020983  | 0.84                  | 1                        | 0.83                  | 1                        | 0.83                  | 1                        | 0.83                  | 1                        |
| 14020984  | 1.25                  | 1                        | 0.73                  | 1                        | 0.92                  | 1                        | 0.97                  | 1                        |
| 14020987  | 3.03                  | 3                        | 2.77                  | 3                        | 3.70                  | 4                        | 3.17                  | 3                        |
| 14020994  | 0.98                  | 1                        | 0.92                  | 1                        | 1.01                  | 1                        | 0.97                  | 1                        |
| 14020996  | 2.30                  | 2                        | 1.85                  | 2                        | 1.85                  | 2                        | 2.00                  | 2                        |
| 14021002  | 0.49                  | 0                        | 0.47                  | 0                        | 0.52                  | 1                        | 0.49                  | 0                        |
| 14021008  | 1.12                  | 1                        | 1.25                  | 1                        | 1.31                  | 1                        | 1.23                  | 1                        |
| 14021011  | 4.04                  | 4                        | 3.64                  | 4                        | 3.82                  | 4                        | 3.84                  | 4                        |
| 14021014  | 4.04                  | 4                        | 3.92                  | 4                        | 3.84                  | 4                        | 3.93                  | 4                        |
| 14021015  | 2.54                  | 3                        | 3.22                  | 3                        | 2.90                  | 3                        | 2.89                  | 3                        |
| 14021016  | 3.88                  | 4                        | 4.08                  | 4                        | 4.09                  | 4                        | 4.02                  | 4                        |
| 14021017  | 3.47                  | 3                        | 4.07                  | 4                        | 4.03                  | 4                        | 3.86                  | 4                        |
| 14021018  | 3.07                  | 3                        | 3.17                  | 3                        | 2.98                  | 3                        | 3.07                  | 3                        |
| 14021022  | 2.41                  | 2                        | 2.11                  | 2                        | 2.17                  | 2                        | 2.23                  | 2                        |
| 14021023  | 2.18                  | 2                        | 2.02                  | 2                        | 2.13                  | 2                        | 2.11                  | 2                        |
| 14021026  | 9.04                  | 9                        | 7.83                  | 8                        | 7.55                  | 8                        | 8.14                  | 8                        |
| 14021028  | 0.96                  | 1                        | 0.99                  | 1                        | 1.06                  | 1                        | 1.00                  | 1                        |
| 14021030  | 0.79                  | 1                        | 0.73                  | 1                        | 0.79                  | 1                        | 0.77                  | 1                        |
| 14021032  | 0.98                  | 1                        | 1.03                  | 1                        | 1.15                  | 1                        | 1.05                  | 1                        |



| Sample ID | Copy Number           |                          |                       |                          |                       |                          |                       |                          |
|-----------|-----------------------|--------------------------|-----------------------|--------------------------|-----------------------|--------------------------|-----------------------|--------------------------|
|           | r = 1                 |                          | r = 2                 |                          | r = 3                 |                          | Average               |                          |
|           | Ratio<br>(target/ref) | Estimated<br>Copy Number |
| 14021033  | 4.31                  | 4                        | 3.40                  | 3                        | 3.74                  | 4                        | 3.82                  | 4                        |
| 14021034  | 4.00                  | 4                        | 3.96                  | 4                        | 3.61                  | 4                        | 3.86                  | 4                        |
| 14021035  | 4.89                  | 5                        | 4.85                  | 5                        | 4.38                  | 4                        | 4.71                  | 5                        |
| 14021037  | 3.82                  | 4                        | 3.69                  | 4                        | 3.63                  | 4                        | 3.71                  | 4                        |
| 14021040  | 3.80                  | 4                        | 3.63                  | 4                        | 3.76                  | 4                        | 3.73                  | 4                        |
| 14021041  | 1.48                  | 1                        | 1.36                  | 1                        | 1.35                  | 1                        | 1.40                  | 1                        |
| 14021048  | 4.92                  | 5                        | 5.08                  | 5                        | 4.82                  | 5                        | 4.94                  | 5                        |
| 14021049  | 1.89                  | 2                        | 1.92                  | 2                        | 2.04                  | 2                        | 1.95                  | 2                        |
| 14021050  | 0.01                  | 0                        | 0.01                  | 0                        | 0.02                  | 0                        | 0.01                  | 0                        |
| 14021051  | 1.15                  | 1                        | 1.21                  | 1                        | 1.26                  | 1                        | 1.20                  | 1                        |
| 14021052  | 1.34                  | 1                        | 1.25                  | 1                        | 1.18                  | 1                        | 1.26                  | 1                        |
| 14021054  | 1.13                  | 1                        | 1.13                  | 1                        | 1.04                  | 1                        | 1.10                  | 1                        |
| 14021055  | 1.51                  | 2                        | 1.67                  | 2                        | 2.07                  | 2                        | 1.75                  | 2                        |
| 14021056  | 8.03                  | 8                        | 6.93                  | 7                        | 6.97                  | 7                        | 7.31                  | 7                        |
| 14021061  | 0.74                  | 1                        | 0.74                  | 1                        | 0.65                  | 1                        | 0.71                  | 1                        |
| 14021069  | 1.99                  | 2                        | 2.03                  | 2                        | 1.82                  | 2                        | 1.95                  | 2                        |
| 14021070  | 1.74                  | 2                        | 1.66                  | 2                        | 1.74                  | 2                        | 1.71                  | 2                        |
| 14021071  | 1.99                  | 2                        | 2.10                  | 2                        | 2.12                  | 2                        | 2.07                  | 2                        |
| 14021073  | 1.02                  | 1                        | 1.18                  | 1                        | 1.09                  | 1                        | 1.10                  | 1                        |

| Sample ID | Copy Number           |                          |                       |                          |                       |                          |                       |                          |
|-----------|-----------------------|--------------------------|-----------------------|--------------------------|-----------------------|--------------------------|-----------------------|--------------------------|
|           | r = 1                 |                          | r = 2                 |                          | r = 3                 |                          | Average               |                          |
|           | Ratio<br>(target/ref) | Estimated<br>Copy Number |
| 14021075  | 2.88                  | 3                        | 2.36                  | 2                        | 3.34                  | 3                        | 2.86                  | 3                        |
| 14021076  | 5.27                  | 5                        | 5.27                  | 5                        | 5.48                  | 5                        | 5.34                  | 5                        |
| 14021081  | 4.02                  | 4                        | 4.50                  | 4                        | 4.17                  | 4                        | 4.23                  | 4                        |
| 14021082  | 4.15                  | 4                        | 4.23                  | 4                        | 4.19                  | 4                        | 4.19                  | 4                        |
| 14021086  | 2.10                  | 2                        | 2.14                  | 2                        | 1.99                  | 2                        | 2.08                  | 2                        |
| 14021089  | 1.09                  | 1                        | 0.95                  | 1                        | 0.97                  | 1                        | 1.00                  | 1                        |
| 14021099  | 3.89                  | 4                        | 3.48                  | 3                        | 3.54                  | 4                        | 3.64                  | 4                        |
| 14021101  | 2.16                  | 2                        | 2.22                  | 2                        | 2.13                  | 2                        | 2.17                  | 2                        |
| 14021106  | 0.96                  | 1                        | 1.09                  | 1                        | 1.07                  | 1                        | 1.04                  | 1                        |
| 14021107  | 2.13                  | 2                        | 2.11                  | 2                        | 2.10                  | 2                        | 2.11                  | 2                        |
| 14021118  | 0.96                  | 1                        | 1.06                  | 1                        | 0.92                  | 1                        | 0.98                  | 1                        |
| 14021119  | 1.03                  | 1                        | 1.02                  | 1                        | 1.01                  | 1                        | 1.02                  | 1                        |
| 14021125  | 0.93                  | 1                        | 0.95                  | 1                        | 0.84                  | 1                        | 0.91                  | 1                        |
| 14021130  | 2.58                  | 3                        | 1.97                  | 2                        | 1.93                  | 2                        | 2.16                  | 2                        |
| 14021132  | 1.05                  | 1                        | 1.15                  | 1                        | 1.17                  | 1                        | 1.12                  | 1                        |
| 14021198  | 1.94                  | 2                        | 1.76                  | 2                        | 2.27                  | 2                        | 1.99                  | 2                        |
| 14021212  | 5.57                  | 6                        | 3.58                  | 4                        | 3.77                  | 4                        | 4.30                  | 4                        |
| 14021214  | 0.77                  | 1                        | 0.94                  | 1                        | 0.88                  | 1                        | 0.86                  | 1                        |
| 14021217  | 2.05                  | 2                        | 2.15                  | 2                        | 2.18                  | 2                        | 2.12                  | 2                        |

| Sample ID | Copy Number           |                          |                       |                          |                       |                          |                       |                          |
|-----------|-----------------------|--------------------------|-----------------------|--------------------------|-----------------------|--------------------------|-----------------------|--------------------------|
|           | r = 1                 |                          | r = 2                 |                          | r = 3                 |                          | Average               |                          |
|           | Ratio<br>(target/ref) | Estimated<br>Copy Number |
| 14021220  | 0.85                  | 1                        | 0.88                  | 1                        | 0.93                  | 1                        | 0.89                  | 1                        |
| 14021223  | 2.60                  | 3                        | 2.72                  | 3                        | 3.45                  | 3                        | 2.92                  | 3                        |
| 14021227  | 6.95                  | 7                        | 8.02                  | 8                        | 9.53                  | 10                       | 8.17                  | 8                        |
| 14021229  | 3.61                  | 4                        | 3.99                  | 4                        | 2.93                  | 3                        | 3.51                  | 4                        |
| 14021230  | 4.81                  | 5                        | 4.45                  | 4                        | 5.14                  | 5                        | 4.80                  | 5                        |
| 14021231  | 0.64                  | 1                        | 0.56                  | 1                        | 0.87                  | 1                        | 0.69                  | 1                        |
| 14021232  | 0.88                  | 1                        | 1.04                  | 1                        | 1.10                  | 1                        | 1.01                  | 1                        |
| 14021233  | 1.10                  | 1                        | 1.03                  | 1                        | 1.08                  | 1                        | 1.07                  | 1                        |
| 14021236  | 0.70                  | 1                        | 0.73                  | 1                        | 0.81                  | 1                        | 0.75                  | 1                        |
| 14021238  | 0.88                  | 1                        | 0.90                  | 1                        | 0.93                  | 1                        | 0.91                  | 1                        |
| 14021239  | 0.27                  | 0                        | 0.29                  | 0                        | 0.30                  | 0                        | 0.29                  | 0                        |
| 14021241  | 2.59                  | 3                        | 2.68                  | 3                        | 2.59                  | 3                        | 2.62                  | 3                        |
| 14021251  | 3.59                  | 4                        | 4.03                  | 4                        | 4.10                  | 4                        | 3.91                  | 4                        |
| 14021252  | 3.94                  | 4                        | 4.10                  | 4                        | 3.44                  | 3                        | 3.83                  | 4                        |
| 14021256  | 1.90                  | 2                        | 2.08                  | 2                        | 1.91                  | 2                        | 1.96                  | 2                        |
| 14021258  | 5.33                  | 5                        | 6.08                  | 6                        | 6.34                  | 6                        | 5.91                  | 6                        |
| 14021265  | 2.42                  | 2                        | 2.13                  | 2                        | 2.08                  | 2                        | 2.21                  | 2                        |
| 14021266  | 1.81                  | 2                        | 1.72                  | 2                        | 2.40                  | 2                        | 1.98                  | 2                        |
| 14021271  | 1.60                  | 2                        | 1.71                  | 2                        | 1.97                  | 2                        | 1.76                  | 2                        |

| Sample ID | Copy Number           |                          |                       |                          |                       |                          |                       |                          |
|-----------|-----------------------|--------------------------|-----------------------|--------------------------|-----------------------|--------------------------|-----------------------|--------------------------|
|           | r = 1                 |                          | r = 2                 |                          | r = 3                 |                          | Average               |                          |
|           | Ratio<br>(target/ref) | Estimated<br>Copy Number |
| 14021272  | 2.01                  | 2                        | 2.00                  | 2                        | 1.87                  | 2                        | 1.96                  | 2                        |
| 14021273  | 2.34                  | 2                        | 2.29                  | 2                        | 2.04                  | 2                        | 2.22                  | 2                        |
| 14021276  | 1.06                  | 1                        | 1.09                  | 1                        | 0.83                  | 1                        | 1.00                  | 1                        |
| 14021277  | 1.90                  | 2                        | 1.71                  | 2                        | 1.70                  | 2                        | 1.77                  | 2                        |
| 14021278  | 1.03                  | 1                        | 0.94                  | 1                        | 0.90                  | 1                        | 0.96                  | 1                        |
| 14021279  | 1.60                  | 2                        | 1.54                  | 2                        | 1.63                  | 2                        | 1.59                  | 2                        |
| 14021280  | 0.70                  | 1                        | 1.01                  | 1                        | 1.41                  | 1                        | 1.04                  | 1                        |
| 14021286  | 2.01                  | 2                        | 2.03                  | 2                        | 1.71                  | 2                        | 1.92                  | 2                        |
| 14021290  | 1.20                  | 1                        | 1.11                  | 1                        | 1.10                  | 1                        | 1.14                  | 1                        |
| 14021292  | 5.38                  | 5                        | 4.60                  | 5                        | 4.55                  | 5                        | 4.84                  | 5                        |
| 14021294  | 2.15                  | 2                        | 1.94                  | 2                        | 1.87                  | 2                        | 1.99                  | 2                        |
| 14021297  | 2.08                  | 2                        | 2.05                  | 2                        | 2.00                  | 2                        | 2.05                  | 2                        |
| 14021298  | 1.96                  | 2                        | 1.77                  | 2                        | 1.68                  | 2                        | 1.81                  | 2                        |
| 14021303  | 2.74                  | 3                        | 2.82                  | 3                        | 2.67                  | 3                        | 2.74                  | 3                        |
| 14021306  | 2.77                  | 3                        | 2.90                  | 3                        | 2.71                  | 3                        | 2.79                  | 3                        |
| 14021308  | 2.94                  | 3                        | 2.64                  | 3                        | 2.59                  | 3                        | 2.72                  | 3                        |
| 14021311  | 1.19                  | 1                        | 1.19                  | 1                        | 1.20                  | 1                        | 1.19                  | 1                        |
| 14021314  | 1.14                  | 1                        | 1.02                  | 1                        | 1.22                  | 1                        | 1.13                  | 1                        |
| 14021318  | 1.70                  | 2                        | 1.73                  | 2                        | 1.85                  | 2                        | 1.76                  | 2                        |

| Sample ID | Copy Number           |                          |                       |                          |                       |                          |                       |                          |
|-----------|-----------------------|--------------------------|-----------------------|--------------------------|-----------------------|--------------------------|-----------------------|--------------------------|
|           | r = 1                 |                          | r = 2                 |                          | r = 3                 |                          | Average               |                          |
|           | Ratio<br>(target/ref) | Estimated<br>Copy Number |
| 14021334  | 1.02                  | 1                        | 1.13                  | 1                        | 1.13                  | 1                        | 1.09                  | 1                        |
| 14021335  | 1.10                  | 1                        | 1.05                  | 1                        | 1.08                  | 1                        | 1.08                  | 1                        |
| 14021337  | 1.52                  | 2                        | 1.53                  | 2                        | 1.49                  | 1                        | 1.51                  | 2                        |
| 14021338  | 1.07                  | 1                        | 1.16                  | 1                        | 1.20                  | 1                        | 1.14                  | 1                        |
| 14021341  | 0.99                  | 1                        | 0.89                  | 1                        | 1.08                  | 1                        | 0.99                  | 1                        |
| 14021342  | 0.57                  | 1                        | 0.51                  | 1                        | 0.50                  | 0                        | 0.53                  | 1                        |
| 14021352  | 1.08                  | 1                        | 1.09                  | 1                        | 0.98                  | 1                        | 1.05                  | 1                        |
| 14021353  | 1.04                  | 1                        | 1.09                  | 1                        | 0.93                  | 1                        | 1.02                  | 1                        |
| 14021355  | 0.76                  | 1                        | 0.75                  | 1                        | 0.75                  | 1                        | 0.76                  | 1                        |
| 14021356  | 4.08                  | 4                        | 3.36                  | 3                        | 3.71                  | 4                        | 3.72                  | 4                        |
| 14021360  | 2.22                  | 2                        | 2.19                  | 2                        | 1.95                  | 2                        | 2.12                  | 2                        |
| 14021362  | 4.98                  | 5                        | 5.13                  | 5                        | 5.68                  | 6                        | 5.26                  | 5                        |
| 14021363  | 5.34                  | 5                        | 4.97                  | 5                        | 5.41                  | 5                        | 5.24                  | 5                        |
| 14021369  | 2.59                  | 3                        | 3.10                  | 3                        | 2.55                  | 3                        | 2.75                  | 3                        |
| 14021370  | 1.89                  | 2                        | 1.43                  | 1                        | 1.95                  | 2                        | 1.76                  | 2                        |
| 14021372  | 0.95                  | 1                        | 0.85                  | 1                        | 1.01                  | 1                        | 0.94                  | 1                        |
| 14021375  | 1.74                  | 2                        | 1.63                  | 2                        | 1.68                  | 2                        | 1.68                  | 2                        |
| 14021376  | 4.00                  | 4                        | 3.40                  | 3                        | 3.07                  | 3                        | 3.49                  | 3                        |
| 14021379  | 4.08                  | 4                        | 5.68                  | 6                        | 4.82                  | 5                        | 4.86                  | 5                        |

| Sample ID | Copy Number           |                          |                       |                          |                       |                          |                       |                          |
|-----------|-----------------------|--------------------------|-----------------------|--------------------------|-----------------------|--------------------------|-----------------------|--------------------------|
|           | r = 1                 |                          | r = 2                 |                          | r = 3                 |                          | Average               |                          |
|           | Ratio<br>(target/ref) | Estimated<br>Copy Number |
| 14021381  | 1.14                  | 1                        | 0.98                  | 1                        | 1.05                  | 1                        | 1.06                  | 1                        |
| 14021383  | 1.00                  | 1                        | 1.06                  | 1                        | 1.19                  | 1                        | 1.09                  | 1                        |
| 14021385  | 1.18                  | 1                        | 1.13                  | 1                        | 0.91                  | 1                        | 1.07                  | 1                        |
| 14021387  | 12.73                 | 13                       | 9.29                  | 9                        | 8.12                  | 8                        | 10.05                 | 10                       |
| 14021388  | 2.28                  | 2                        | 2.33                  | 2                        | 2.22                  | 2                        | 2.28                  | 2                        |
| 14021389  | 1.22                  | 1                        | 1.10                  | 1                        | 1.20                  | 1                        | 1.17                  | 1                        |
| 14021392  | 1.94                  | 2                        | 2.07                  | 2                        | 2.08                  | 2                        | 2.03                  | 2                        |
| 14021394  | 2.17                  | 2                        | 2.05                  | 2                        | 2.08                  | 2                        | 2.10                  | 2                        |
| 14021399  | 3.04                  | 3                        | 3.01                  | 3                        | 2.96                  | 3                        | 3.00                  | 3                        |
| 14021408  | 1.09                  | 1                        | 1.06                  | 1                        | 1.17                  | 1                        | 1.11                  | 1                        |
| 14021411  | 2.19                  | 2                        | 2.00                  | 2                        | 2.09                  | 2                        | 2.09                  | 2                        |
| 14021412  | 1.67                  | 2                        | 1.78                  | 2                        | 1.78                  | 2                        | 1.74                  | 2                        |
| 14021424  | 5.27                  | 5                        | 5.25                  | 5                        | 5.72                  | 6                        | 5.41                  | 5                        |
| 14021425  | 5.83                  | 6                        | 5.31                  | 5                        | 4.54                  | 5                        | 5.22                  | 5                        |
| 14021428  | 2.82                  | 3                        | 2.55                  | 3                        | 3.20                  | 3                        | 2.86                  | 3                        |
| 14021429  | 2.04                  | 2                        | 2.05                  | 2                        | 1.92                  | 2                        | 2.00                  | 2                        |
| 14021431  | 1.89                  | 2                        | 1.64                  | 2                        | 1.65                  | 2                        | 1.73                  | 2                        |
| 14021432  | 2.14                  | 2                        | 2.21                  | 2                        | 2.07                  | 2                        | 2.14                  | 2                        |
| 14021437  | 3.73                  | 4                        | 3.36                  | 3                        | 3.47                  | 3                        | 3.52                  | 4                        |

| Sample ID | Copy Number           |                          |                       |                          |                       |                          |                       |                          |
|-----------|-----------------------|--------------------------|-----------------------|--------------------------|-----------------------|--------------------------|-----------------------|--------------------------|
|           | r = 1                 |                          | r = 2                 |                          | r = 3                 |                          | Average               |                          |
|           | Ratio<br>(target/ref) | Estimated<br>Copy Number |
| 14021438  | 5.09                  | 5                        | 6.60                  | 7                        | 4.27                  | 4                        | 5.32                  | 5                        |
| 14021439  | 4.56                  | 5                        | 4.51                  | 5                        | 4.51                  | 5                        | 4.53                  | 5                        |
| 14021441  | 1.05                  | 1                        | 1.01                  | 1                        | 1.21                  | 1                        | 1.09                  | 1                        |
| 14021443  | 3.59                  | 4                        | 3.12                  | 3                        | 3.25                  | 3                        | 3.32                  | 3                        |
| 14021444  | 2.32                  | 2                        | 2.38                  | 2                        | 2.20                  | 2                        | 2.30                  | 2                        |
| 14021447  | 2.71                  | 3                        | 2.92                  | 3                        | 2.52                  | 3                        | 2.72                  | 3                        |
| 14021450  | 1.22                  | 1                        | 0.97                  | 1                        | 0.91                  | 1                        | 1.03                  | 1                        |
| 14021451  | 0.82                  | 1                        | 0.72                  | 1                        | 1.25                  | 1                        | 0.93                  | 1                        |
| 14021453  | 0.80                  | 1                        | 0.87                  | 1                        | 0.91                  | 1                        | 0.86                  | 1                        |
| 14021455  | 2.14                  | 2                        | 2.09                  | 2                        | 1.86                  | 2                        | 2.03                  | 2                        |
| 14021458  | 1.08                  | 1                        | 0.98                  | 1                        | 0.86                  | 1                        | 0.97                  | 1                        |
| 14021463  | 1.34                  | 1                        | 1.02                  | 1                        | 1.03                  | 1                        | 1.13                  | 1                        |
| 14021467  | 0.95                  | 1                        | 0.93                  | 1                        | 0.96                  | 1                        | 0.95                  | 1                        |
| 14021468  | 1.48                  | 1                        | 1.21                  | 1                        | 1.34                  | 1                        | 1.34                  | 1                        |
| 14021469  | 1.03                  | 1                        | 1.13                  | 1                        | 1.08                  | 1                        | 1.08                  | 1                        |
| 14021470  | 2.03                  | 2                        | 2.21                  | 2                        | 1.98                  | 2                        | 2.07                  | 2                        |
| 14021471  | 5.08                  | 5                        | 4.86                  | 5                        | 5.10                  | 5                        | 5.01                  | 5                        |
| 14021473  | 1.91                  | 2                        | 1.70                  | 2                        | 1.70                  | 2                        | 1.77                  | 2                        |
| 14021474  | 2.93                  | 3                        | 3.09                  | 3                        | 2.82                  | 3                        | 2.95                  | 3                        |

| Sample ID | Copy Number           |                          |                       |                          |                       |                          |                       |                          |
|-----------|-----------------------|--------------------------|-----------------------|--------------------------|-----------------------|--------------------------|-----------------------|--------------------------|
|           | r = 1                 |                          | r = 2                 |                          | r = 3                 |                          | Average               |                          |
|           | Ratio<br>(target/ref) | Estimated<br>Copy Number |
| 14021476  | 1.10                  | 1                        | 1.36                  | 1                        | 1.46                  | 1                        | 1.31                  | 1                        |
| 14021478  | 1.00                  | 1                        | 1.00                  | 1                        | 1.31                  | 1                        | 1.10                  | 1                        |
| 14021479  | 2.87                  | 3                        | 2.20                  | 2                        | 2.20                  | 2                        | 2.42                  | 2                        |
| 14021483  | 1.23                  | 1                        | 1.24                  | 1                        | 1.23                  | 1                        | 1.23                  | 1                        |
| 14021484  | 2.59                  | 3                        | 2.81                  | 3                        | 2.82                  | 3                        | 2.74                  | 3                        |
| 14021485  | 2.10                  | 2                        | 2.02                  | 2                        | 1.99                  | 2                        | 2.04                  | 2                        |
| 14021492  | 1.85                  | 2                        | 1.84                  | 2                        | 1.82                  | 2                        | 1.83                  | 2                        |
| 14021493  | 1.86                  | 2                        | 1.73                  | 2                        | 1.85                  | 2                        | 1.81                  | 2                        |
| 14021496  | 2.55                  | 3                        | 2.73                  | 3                        | 3.58                  | 4                        | 2.95                  | 3                        |
| 14021497  | 2.89                  | 3                        | 2.99                  | 3                        | 2.70                  | 3                        | 2.86                  | 3                        |
| 14021498  | 8.02                  | 8                        | 8.83                  | 9                        | 7.05                  | 7                        | 7.97                  | 8                        |
| 14021500  | 2.04                  | 2                        | 2.19                  | 2                        | 1.85                  | 2                        | 2.03                  | 2                        |
| 14021501  | 7.96                  | 8                        | 7.34                  | 7                        | 6.50                  | 6                        | 7.27                  | 7                        |
| 14021502  | 8.51                  | 9                        | 7.02                  | 7                        | 7.82                  | 8                        | 7.78                  | 8                        |
| 14021506  | 1.83                  | 2                        | 1.81                  | 2                        | 1.86                  | 2                        | 1.83                  | 2                        |
| 14021509  | 1.89                  | 2                        | 1.97                  | 2                        | 1.76                  | 2                        | 1.87                  | 2                        |
| 14021511  | 1.17                  | 1                        | 1.15                  | 1                        | 1.02                  | 1                        | 1.11                  | 1                        |
| 14021514  | 0.86                  | 1                        | 0.85                  | 1                        | 0.90                  | 1                        | 0.87                  | 1                        |
| 14021517  | 0.97                  | 1                        | 1.02                  | 1                        | 1.09                  | 1                        | 1.03                  | 1                        |



| Sample ID | Copy Number           |                          |                       |                          |                       |                          |                       |                          |
|-----------|-----------------------|--------------------------|-----------------------|--------------------------|-----------------------|--------------------------|-----------------------|--------------------------|
|           | r = 1                 |                          | r = 2                 |                          | r = 3                 |                          | Average               |                          |
|           | Ratio<br>(target/ref) | Estimated<br>Copy Number |
| 14021519  | 3.67                  | 4                        | 3.76                  | 4                        | 3.51                  | 4                        | 3.65                  | 4                        |
| 14021520  | 0.96                  | 1                        | 0.86                  | 1                        | 0.96                  | 1                        | 0.93                  | 1                        |
| 14021524  | 1.06                  | 1                        | 1.06                  | 1                        | 1.16                  | 1                        | 1.09                  | 1                        |
| 14021526  | 1.20                  | 1                        | 1.14                  | 1                        | 1.08                  | 1                        | 1.14                  | 1                        |
| 14021532  | 1.08                  | 1                        | 1.17                  | 1                        | 1.08                  | 1                        | 1.11                  | 1                        |
| 14021533  | 1.09                  | 1                        | 1.13                  | 1                        | 1.14                  | 1                        | 1.12                  | 1                        |
| 14021535  | 2.02                  | 2                        | 2.02                  | 2                        | 2.03                  | 2                        | 2.02                  | 2                        |
| 14021536  | 2.43                  | 2                        | 2.63                  | 3                        | 2.87                  | 3                        | 2.64                  | 3                        |
| 14021539  | 1.94                  | 2                        | 2.10                  | 2                        | 2.19                  | 2                        | 2.08                  | 2                        |
| 14021542  | 0.92                  | 1                        | 0.91                  | 1                        | 0.80                  | 1                        | 0.88                  | 1                        |
| 14021544  | 0.42                  | 0                        | 0.45                  | 0                        | 0.52                  | 1                        | 0.46                  | 0                        |
| 14021545  | 1.12                  | 1                        | 1.09                  | 1                        | 1.20                  | 1                        | 1.13                  | 1                        |
| 14021550  | 1.14                  | 1                        | 0.96                  | 1                        | 1.02                  | 1                        | 1.04                  | 1                        |
| 14021554  | 1.16                  | 1                        | 1.20                  | 1                        | 1.16                  | 1                        | 1.17                  | 1                        |
| 14021555  | 0.93                  | 1                        | 1.18                  | 1                        | 1.14                  | 1                        | 1.08                  | 1                        |
| 14021557  | 1.85                  | 2                        | 1.83                  | 2                        | 1.89                  | 2                        | 1.85                  | 2                        |
| 14021558  | 1.06                  | 1                        | 1.06                  | 1                        | 1.12                  | 1                        | 1.08                  | 1                        |
| 14021559  | 0.66                  | 1                        | 0.56                  | 1                        | 0.65                  | 1                        | 0.62                  | 1                        |
| 14021564  | 2.95                  | 3                        | 2.90                  | 3                        | 2.89                  | 3                        | 2.91                  | 3                        |

| Sample ID | Copy Number           |                          |                       |                          |                       |                          |                       |                          |
|-----------|-----------------------|--------------------------|-----------------------|--------------------------|-----------------------|--------------------------|-----------------------|--------------------------|
|           | r = 1                 |                          | r = 2                 |                          | r = 3                 |                          | Average               |                          |
|           | Ratio<br>(target/ref) | Estimated<br>Copy Number |
| 14021566  | 4.37                  | 4                        | 4.65                  | 5                        | 5.14                  | 5                        | 4.72                  | 5                        |
| 14021572  | 0.83                  | 1                        | 0.93                  | 1                        | 0.95                  | 1                        | 0.91                  | 1                        |
| 14021574  | 1.74                  | 2                        | 1.95                  | 2                        | 2.50                  | 2                        | 2.07                  | 2                        |
| 14021583  | 1.12                  | 1                        | 1.11                  | 1                        | 1.03                  | 1                        | 1.09                  | 1                        |
| 14021586  | 1.06                  | 1                        | 1.32                  | 1                        | 1.00                  | 1                        | 1.13                  | 1                        |
| 14021589  | 1.27                  | 1                        | 1.33                  | 1                        | 1.31                  | 1                        | 1.30                  | 1                        |
| 14021592  | 1.09                  | 1                        | 1.16                  | 1                        | 1.05                  | 1                        | 1.10                  | 1                        |
| 14021593  | 4.10                  | 4                        | 3.98                  | 4                        | 3.55                  | 4                        | 3.87                  | 4                        |
| 14021597  | 1.16                  | 1                        | 1.09                  | 1                        | 1.12                  | 1                        | 1.12                  | 1                        |
| 14021598  | 0.31                  | 0                        | 0.31                  | 0                        | 0.32                  | 0                        | 0.31                  | 0                        |
| 14021601  | 4.59                  | 5                        | 4.64                  | 5                        | 4.23                  | 4                        | 4.49                  | 4                        |
| 14021602  | 5.16                  | 5                        | 5.68                  | 6                        | 4.67                  | 5                        | 5.17                  | 5                        |
| 14021608  | 3.39                  | 3                        | 3.91                  | 4                        | 3.34                  | 3                        | 3.55                  | 4                        |
| 14021609  | 1.95                  | 2                        | 1.94                  | 2                        | 1.77                  | 2                        | 1.89                  | 2                        |
| 14021611  | 3.10                  | 3                        | 3.12                  | 3                        | 3.21                  | 3                        | 3.14                  | 3                        |
| 14021620  | 2.51                  | 3                        | 2.40                  | 2                        | 2.41                  | 2                        | 2.44                  | 2                        |
| 14021621  | 3.16                  | 3                        | 2.76                  | 3                        | 2.61                  | 3                        | 2.84                  | 3                        |
| 14021626  | 1.15                  | 1                        | 1.28                  | 1                        | 1.33                  | 1                        | 1.25                  | 1                        |
| 14021628  | 1.18                  | 1                        | 1.35                  | 1                        | 1.38                  | 1                        | 1.30                  | 1                        |

| Sample ID | Copy Number           |                          |                       |                          |                       |                          |                       |                          |
|-----------|-----------------------|--------------------------|-----------------------|--------------------------|-----------------------|--------------------------|-----------------------|--------------------------|
|           | r = 1                 |                          | r = 2                 |                          | r = 3                 |                          | Average               |                          |
|           | Ratio<br>(target/ref) | Estimated<br>Copy Number |
| 14021629  | 1.41                  | 1                        | 1.38                  | 1                        | 1.43                  | 1                        | 1.40                  | 1                        |
| 14021634  | 1.39                  | 1                        | 1.55                  | 2                        | 1.51                  | 2                        | 1.48                  | 1                        |
| 14021635  | 1.39                  | 1                        | 1.33                  | 1                        | 1.18                  | 1                        | 1.30                  | 1                        |
| 14021636  | 1.45                  | 1                        | 1.35                  | 1                        | 1.25                  | 1                        | 1.35                  | 1                        |
| 14021639  | 1.19                  | 1                        | 1.08                  | 1                        | 1.10                  | 1                        | 1.12                  | 1                        |
| 14021641  | 1.10                  | 1                        | 1.12                  | 1                        | 1.02                  | 1                        | 1.08                  | 1                        |
| 14021642  | 1.25                  | 1                        | 1.15                  | 1                        | 1.16                  | 1                        | 1.19                  | 1                        |
| 14021644  | 0.69                  | 1                        | 0.62                  | 1                        | 0.55                  | 1                        | 0.62                  | 1                        |
| 14021646  | 3.52                  | 4                        | 3.49                  | 3                        | 3.40                  | 3                        | 3.47                  | 3                        |
| 14021647  | 3.60                  | 4                        | 3.54                  | 4                        | 3.93                  | 4                        | 3.69                  | 4                        |
| 14021648  | 3.44                  | 3                        | 3.33                  | 3                        | 3.45                  | 3                        | 3.41                  | 3                        |
| 14021649  | 2.10                  | 2                        | 1.87                  | 2                        | 2.14                  | 2                        | 2.04                  | 2                        |
| 14021650  | 2.55                  | 3                        | 2.54                  | 3                        | 2.58                  | 3                        | 2.56                  | 3                        |
| 14021651  | 1.17                  | 1                        | 1.35                  | 1                        | 1.13                  | 1                        | 1.22                  | 1                        |
| 14021652  | 0.91                  | 1                        | 0.77                  | 1                        | 1.04                  | 1                        | 0.91                  | 1                        |
| 14021653  | 1.33                  | 1                        | 1.13                  | 1                        | 1.26                  | 1                        | 1.24                  | 1                        |
| 14021654  | 1.16                  | 1                        | 1.42                  | 1                        | 1.32                  | 1                        | 1.30                  | 1                        |
| 14021655  | 0.36                  | 0                        | 0.38                  | 0                        | 0.37                  | 0                        | 0.37                  | 0                        |
| 14021657  | 0.89                  | 1                        | 1.00                  | 1                        | 0.93                  | 1                        | 0.94                  | 1                        |

| Sample ID | Copy Number           |                          |                       |                          |                       |                          |                       |                          |
|-----------|-----------------------|--------------------------|-----------------------|--------------------------|-----------------------|--------------------------|-----------------------|--------------------------|
|           | r = 1                 |                          | r = 2                 |                          | r = 3                 |                          | Average               |                          |
|           | Ratio<br>(target/ref) | Estimated<br>Copy Number |
| 14021661  | 5.77                  | 6                        | 5.36                  | 5                        | 4.86                  | 5                        | 5.33                  | 5                        |
| 14021662  | 4.08                  | 4                        | 3.96                  | 4                        | 3.80                  | 4                        | 3.95                  | 4                        |
| 14021663  | 5.21                  | 5                        | 3.96                  | 4                        | 4.17                  | 4                        | 4.44                  | 4                        |
| 14021664  | 4.08                  | 4                        | 4.11                  | 4                        | 4.14                  | 4                        | 4.11                  | 4                        |
| 14021671  | 1.29                  | 1                        | 1.08                  | 1                        | 1.09                  | 1                        | 1.15                  | 1                        |
| 14021672  | 6.64                  | 7                        | 6.87                  | 7                        | 6.79                  | 7                        | 6.77                  | 7                        |
| 14021679  | 4.50                  | 4                        | 4.42                  | 4                        | 4.15                  | 4                        | 4.35                  | 4                        |
| 14021680  | 4.24                  | 4                        | 4.44                  | 4                        | 4.22                  | 4                        | 4.30                  | 4                        |
| 14021681  | 2.04                  | 2                        | 2.39                  | 2                        | 2.30                  | 2                        | 2.24                  | 2                        |
| 14021682  | 1.95                  | 2                        | 1.94                  | 2                        | 2.48                  | 2                        | 2.12                  | 2                        |
| 14021685  | 1.10                  | 1                        | 0.93                  | 1                        | 1.50                  | 2                        | 1.18                  | 1                        |
| 14021686  | 1.00                  | 1                        | 0.95                  | 1                        | 1.08                  | 1                        | 1.01                  | 1                        |
| 14021687  | 1.10                  | 1                        | 1.08                  | 1                        | 1.20                  | 1                        | 1.12                  | 1                        |
| 14021689  | 5.62                  | 6                        | 5.64                  | 6                        | 6.08                  | 6                        | 5.78                  | 6                        |
| 14021690  | 1.19                  | 1                        | 1.17                  | 1                        | 1.11                  | 1                        | 1.16                  | 1                        |
| 14021692  | 3.43                  | 3                        | 2.90                  | 3                        | 3.14                  | 3                        | 3.16                  | 3                        |
| 14021693  | 2.63                  | 3                        | 2.81                  | 3                        | 2.61                  | 3                        | 2.68                  | 3                        |
| 14021694  | 2.90                  | 3                        | 3.45                  | 3                        | 3.28                  | 3                        | 3.21                  | 3                        |
| 14021695  | 1.87                  | 2                        | 1.67                  | 2                        | 2.03                  | 2                        | 1.86                  | 2                        |

| Sample ID | Copy Number           |                          |                       |                          |                       |                          |                       |                          |
|-----------|-----------------------|--------------------------|-----------------------|--------------------------|-----------------------|--------------------------|-----------------------|--------------------------|
|           | r = 1                 |                          | r = 2                 |                          | r = 3                 |                          | Average               |                          |
|           | Ratio<br>(target/ref) | Estimated<br>Copy Number |
| 14021698  | 3.61                  | 4                        | 3.73                  | 4                        | 3.80                  | 4                        | 3.71                  | 4                        |
| 14021703  | 2.08                  | 2                        | 2.26                  | 2                        | 2.29                  | 2                        | 2.21                  | 2                        |
| 14021704  | 0.88                  | 1                        | 0.60                  | 1                        | 0.63                  | 1                        | 0.70                  | 1                        |
| 14021705  | 7.04                  | 7                        | 7.35                  | 7                        | 8.08                  | 8                        | 7.49                  | 7                        |
| 14021706  | 2.13                  | 2                        | 1.63                  | 2                        | 2.19                  | 2                        | 1.98                  | 2                        |
| 14021710  | 12.11                 | 12                       | 12.94                 | 13                       | 11.63                 | 12                       | 12.23                 | 12                       |
| 14021711  | 1.16                  | 1                        | 1.32                  | 1                        | 1.21                  | 1                        | 1.23                  | 1                        |
| 14021713  | 4.35                  | 4                        | 3.25                  | 3                        | 3.83                  | 4                        | 3.81                  | 4                        |
| 14021714  | 6.36                  | 6                        | 4.97                  | 5                        | 5.99                  | 6                        | 5.78                  | 6                        |
| 14021715  | 2.28                  | 2                        | 2.04                  | 2                        | 1.90                  | 2                        | 2.07                  | 2                        |
| 14021718  | 4.41                  | 4                        | 4.42                  | 4                        | 4.49                  | 4                        | 4.44                  | 4                        |
| 14021720  | 1.29                  | 1                        | 1.41                  | 1                        | 1.43                  | 1                        | 1.38                  | 1                        |
| 14021721  | 2.34                  | 2                        | 2.51                  | 3                        | 2.84                  | 3                        | 2.56                  | 3                        |
| 14021722  | 0.94                  | 1                        | 0.93                  | 1                        | 1.00                  | 1                        | 0.96                  | 1                        |
| 14021725  | 3.24                  | 3                        | 4.19                  | 4                        | 4.19                  | 4                        | 3.87                  | 4                        |
| 14021728  | 1.17                  | 1                        | 1.20                  | 1                        | 1.32                  | 1                        | 1.23                  | 1                        |
| 14021731  | 1.14                  | 1                        | 1.30                  | 1                        | 1.32                  | 1                        | 1.25                  | 1                        |
| 14021732  | 1.33                  | 1                        | 1.40                  | 1                        | 1.57                  | 2                        | 1.43                  | 1                        |
| 14021733  | 0.77                  | 1                        | 0.69                  | 1                        | 0.74                  | 1                        | 0.73                  | 1                        |

| Sample ID | Copy Number           |                          |                       |                          |                       |                          |                       |                          |
|-----------|-----------------------|--------------------------|-----------------------|--------------------------|-----------------------|--------------------------|-----------------------|--------------------------|
|           | r = 1                 |                          | r = 2                 |                          | r = 3                 |                          | Average               |                          |
|           | Ratio<br>(target/ref) | Estimated<br>Copy Number |
| 14021735  | 2.02                  | 2                        | 2.03                  | 2                        | 1.96                  | 2                        | 2.00                  | 2                        |
| 14021736  | 1.98                  | 2                        | 2.03                  | 2                        | 1.83                  | 2                        | 1.94                  | 2                        |
| 14021739  | 1.02                  | 1                        | 0.99                  | 1                        | 0.97                  | 1                        | 0.99                  | 1                        |
| 14021741  | 2.91                  | 3                        | 2.71                  | 3                        | 2.64                  | 3                        | 2.75                  | 3                        |
| 14021744  | 0.42                  | 0                        | 0.36                  | 0                        | 0.37                  | 0                        | 0.38                  | 0                        |
| 14021745  | 2.68                  | 3                        | 4.25                  | 4                        | 4.24                  | 4                        | 3.72                  | 4                        |
| 14021746  | 1.55                  | 2                        | 1.48                  | 1                        | 1.07                  | 1                        | 1.37                  | 1                        |
| 14021747  | 1.57                  | 2                        | 1.35                  | 1                        | 1.43                  | 1                        | 1.45                  | 1                        |
| 14021748  | 2.01                  | 2                        | 1.90                  | 2                        | 1.95                  | 2                        | 1.95                  | 2                        |
| 14021750  | 0.54                  | 1                        | 0.52                  | 1                        | 0.53                  | 1                        | 0.53                  | 1                        |
| 14021751  | 1.04                  | 1                        | 1.00                  | 1                        | 1.10                  | 1                        | 1.04                  | 1                        |
| 14021753  | 3.25                  | 3                        | 3.36                  | 3                        | 3.58                  | 4                        | 3.40                  | 3                        |
| 14021757  | 3.29                  | 3                        | 1.95                  | 2                        | 3.21                  | 3                        | 2.82                  | 3                        |
| 14021759  | 4.41                  | 4                        | 7.42                  | 7                        | 4.19                  | 4                        | 5.34                  | 5                        |
| 14021761  | 2.25                  | 2                        | 2.03                  | 2                        | 1.95                  | 2                        | 2.07                  | 2                        |
| 14021762  | 2.18                  | 2                        | 2.24                  | 2                        | 1.90                  | 2                        | 2.11                  | 2                        |
| 14021765  | 1.87                  | 2                        | 1.97                  | 2                        | 1.86                  | 2                        | 1.90                  | 2                        |
| 14021766  | 3.85                  | 4                        | 3.23                  | 3                        | 3.11                  | 3                        | 3.40                  | 3                        |
| 14021767  | 3.65                  | 4                        | 4.02                  | 4                        | 3.79                  | 4                        | 3.82                  | 4                        |

| Sample ID | Copy Number           |                          |                       |                          |                       |                          |                       |                          |
|-----------|-----------------------|--------------------------|-----------------------|--------------------------|-----------------------|--------------------------|-----------------------|--------------------------|
|           | r = 1                 |                          | r = 2                 |                          | r = 3                 |                          | Average               |                          |
|           | Ratio<br>(target/ref) | Estimated<br>Copy Number |
| 14021773  | 2.92                  | 3                        | 2.64                  | 3                        | 3.05                  | 3                        | 2.87                  | 3                        |
| 14021775  | 1.29                  | 1                        | 1.35                  | 1                        | 1.41                  | 1                        | 1.35                  | 1                        |
| 14021777  | 2.57                  | 3                        | 2.76                  | 3                        | 2.67                  | 3                        | 2.67                  | 3                        |
| 14021778  | 1.08                  | 1                        | 1.30                  | 1                        | 1.37                  | 1                        | 1.25                  | 1                        |
| 14021781  | 1.21                  | 1                        | 1.59                  | 2                        | 1.68                  | 2                        | 1.49                  | 1                        |
| 14021783  | 1.23                  | 1                        | 1.17                  | 1                        | 1.34                  | 1                        | 1.25                  | 1                        |
| 14021784  | 2.04                  | 2                        | 1.96                  | 2                        | 2.03                  | 2                        | 2.01                  | 2                        |
| 14021785  | 3.13                  | 3                        | 3.31                  | 3                        | 3.03                  | 3                        | 3.16                  | 3                        |
| 14021791  | 1.76                  | 2                        | 1.88                  | 2                        | 2.30                  | 2                        | 1.98                  | 2                        |
| 14021792  | 2.07                  | 2                        | 2.06                  | 2                        | 1.96                  | 2                        | 2.03                  | 2                        |
| 14021795  | 4.37                  | 4                        | 3.83                  | 4                        | 4.40                  | 4                        | 4.20                  | 4                        |
| 14021796  | 2.97                  | 3                        | 3.14                  | 3                        | 4.10                  | 4                        | 3.40                  | 3                        |
| 14021798  | 2.19                  | 2                        | 2.35                  | 2                        | 2.02                  | 2                        | 2.19                  | 2                        |
| 14021799  | 0.53                  | 1                        | 0.63                  | 1                        | 0.85                  | 1                        | 0.67                  | 1                        |
| 14021800  | 1.75                  | 2                        | 1.54                  | 2                        | 1.66                  | 2                        | 1.65                  | 2                        |
| 14030005  | 2.45                  | 2                        | 2.27                  | 2                        | 2.16                  | 2                        | 2.29                  | 2                        |
| 14030017  | 1.97                  | 2                        | 2.73                  | 3                        | 2.03                  | 2                        | 2.24                  | 2                        |
| 14030022  | 1.24                  | 1                        | 1.11                  | 1                        | 1.18                  | 1                        | 1.18                  | 1                        |
| 14030023  | 3.59                  | 4                        | 3.00                  | 3                        | 3.28                  | 3                        | 3.29                  | 3                        |

| Sample ID | Copy Number           |                          |                       |                          |                       |                          |                       |                          |
|-----------|-----------------------|--------------------------|-----------------------|--------------------------|-----------------------|--------------------------|-----------------------|--------------------------|
|           | r = 1                 |                          | r = 2                 |                          | r = 3                 |                          | Average               |                          |
|           | Ratio<br>(target/ref) | Estimated<br>Copy Number |
| 14030025  | 3.61                  | 4                        | 3.05                  | 3                        | 3.29                  | 3                        | 3.32                  | 3                        |
| 14030035  | 4.86                  | 5                        | 5.14                  | 5                        | 5.07                  | 5                        | 5.03                  | 5                        |
| 14030038  | 2.75                  | 3                        | 3.08                  | 3                        | 3.29                  | 3                        | 3.04                  | 3                        |
| 14030039  | 2.37                  | 2                        | 2.13                  | 2                        | 2.10                  | 2                        | 2.20                  | 2                        |
| 14030040  | 2.12                  | 2                        | 2.38                  | 2                        | 2.41                  | 2                        | 2.30                  | 2                        |
| 14030044  | 2.07                  | 2                        | 2.71                  | 3                        | 2.90                  | 3                        | 2.56                  | 3                        |
| 14030045  | 2.42                  | 2                        | 2.51                  | 3                        | 2.77                  | 3                        | 2.57                  | 3                        |
| 14030046  | 1.41                  | 1                        | 1.65                  | 2                        | 1.54                  | 2                        | 1.54                  | 2                        |
| 14030047  | 1.45                  | 1                        | 1.59                  | 2                        | 1.53                  | 2                        | 1.52                  | 2                        |
| 14030048  | 2.17                  | 2                        | 2.06                  | 2                        | 2.11                  | 2                        | 2.11                  | 2                        |
| 14030049  | 7.86                  | 8                        | 8.80                  | 9                        | 9.41                  | 9                        | 8.69                  | 9                        |
| 14030053  | 4.96                  | 5                        | 5.74                  | 6                        | 6.35                  | 6                        | 5.68                  | 6                        |
| 14030054  | 5.41                  | 5                        | 6.11                  | 6                        | 6.37                  | 6                        | 5.96                  | 6                        |
| 14030057  | 2.19                  | 2                        | 1.96                  | 2                        | 1.98                  | 2                        | 2.04                  | 2                        |
| 14030061  | 5.46                  | 5                        | 4.63                  | 5                        | 4.34                  | 4                        | 4.81                  | 5                        |
| 14030062  | 5.50                  | 6                        | 4.82                  | 5                        | 4.41                  | 4                        | 4.91                  | 5                        |
| 14030063  | 3.14                  | 3                        | 2.82                  | 3                        | 2.34                  | 2                        | 2.77                  | 3                        |
| 14030064  | 8.79                  | 9                        | 8.88                  | 9                        | 9.02                  | 9                        | 8.90                  | 9                        |
| 14030065  | 4.54                  | 5                        | 4.65                  | 5                        | 4.94                  | 5                        | 4.71                  | 5                        |



| Sample ID | Copy Number           |                          |                       |                          |                       |                          |                       |                          |
|-----------|-----------------------|--------------------------|-----------------------|--------------------------|-----------------------|--------------------------|-----------------------|--------------------------|
|           | r = 1                 |                          | r = 2                 |                          | r = 3                 |                          | Average               |                          |
|           | Ratio<br>(target/ref) | Estimated<br>Copy Number |
| 14030069  | 2.01                  | 2                        | 1.54                  | 2                        | 1.94                  | 2                        | 1.83                  | 2                        |
| 14030070  | 1.52                  | 2                        | 1.36                  | 1                        | 1.40                  | 1                        | 1.42                  | 1                        |
| 14030072  | 4.49                  | 4                        | 4.15                  | 4                        | 4.00                  | 4                        | 4.21                  | 4                        |
| 14030073  | 3.40                  | 3                        | 3.06                  | 3                        | 2.98                  | 3                        | 3.15                  | 3                        |
| 14030074  | 4.24                  | 4                        | 3.96                  | 4                        | 3.91                  | 4                        | 4.04                  | 4                        |
| 14030076  | 2.56                  | 3                        | 2.61                  | 3                        | 2.40                  | 2                        | 2.52                  | 3                        |
| 14030083  | 5.31                  | 5                        | 4.86                  | 5                        | 5.23                  | 5                        | 5.13                  | 5                        |
| 14030084  | 20.88                 | 21                       | 17.64                 | 18                       | 17.47                 | 17                       | 18.66                 | 19                       |
| 14030087  | 0.75                  | 1                        | 0.78                  | 1                        | 0.71                  | 1                        | 0.74                  | 1                        |
| 14030088  | 2.67                  | 3                        | 2.33                  | 2                        | 2.81                  | 3                        | 2.60                  | 3                        |
| 14030089  | 2.01                  | 2                        | 2.14                  | 2                        | 2.30                  | 2                        | 2.15                  | 2                        |
| 14030090  | 3.04                  | 3                        | 3.34                  | 3                        | 3.28                  | 3                        | 3.22                  | 3                        |
| 14030093  | 7.75                  | 8                        | 7.17                  | 7                        | 6.98                  | 7                        | 7.30                  | 7                        |
| 14030096  | 2.09                  | 2                        | 2.28                  | 2                        | 2.50                  | 2                        | 2.29                  | 2                        |
| 14030098  | 0.96                  | 1                        | 1.04                  | 1                        | 1.08                  | 1                        | 1.03                  | 1                        |
| 14030103  | 4.04                  | 4                        | 3.96                  | 4                        | 4.43                  | 4                        | 4.14                  | 4                        |
| 14030106  | 0.74                  | 1                        | 0.83                  | 1                        | 0.80                  | 1                        | 0.79                  | 1                        |
| 14030111  | 2.70                  | 3                        | 2.48                  | 2                        | 2.40                  | 2                        | 2.53                  | 3                        |
| 14030114  | 5.25                  | 5                        | 5.34                  | 5                        | 4.76                  | 5                        | 5.12                  | 5                        |

| Sample ID | Copy Number           |                          |                       |                          |                       |                          |                       |                          |
|-----------|-----------------------|--------------------------|-----------------------|--------------------------|-----------------------|--------------------------|-----------------------|--------------------------|
|           | r = 1                 |                          | r = 2                 |                          | r = 3                 |                          | Average               |                          |
|           | Ratio<br>(target/ref) | Estimated<br>Copy Number |
| 14030115  | 1.17                  | 1                        | 1.14                  | 1                        | 1.11                  | 1                        | 1.14                  | 1                        |
| 14030117  | 0.98                  | 1                        | 0.92                  | 1                        | 0.80                  | 1                        | 0.90                  | 1                        |
| 14030120  | 2.16                  | 2                        | 1.90                  | 2                        | 1.85                  | 2                        | 1.97                  | 2                        |
| 14030122  | 2.78                  | 3                        | 2.77                  | 3                        | 2.86                  | 3                        | 2.80                  | 3                        |
| 14030123  | 3.55                  | 4                        | 3.31                  | 3                        | 3.03                  | 3                        | 3.30                  | 3                        |
| 14030129  | 5.23                  | 5                        | 4.99                  | 5                        | 4.28                  | 4                        | 4.83                  | 5                        |
| 14030132  | 2.23                  | 2                        | 2.18                  | 2                        | 2.34                  | 2                        | 2.25                  | 2                        |
| 14030133  | 1.10                  | 1                        | 0.97                  | 1                        | 0.97                  | 1                        | 1.01                  | 1                        |
| 14030134  | 2.80                  | 3                        | 2.62                  | 3                        | 2.93                  | 3                        | 2.78                  | 3                        |
| 14030149  | 2.21                  | 2                        | 2.17                  | 2                        | 2.12                  | 2                        | 2.17                  | 2                        |
| 14030150  | 2.38                  | 2                        | 2.37                  | 2                        | 2.38                  | 2                        | 2.37                  | 2                        |
| 14030154  | 2.69                  | 3                        | 2.84                  | 3                        | 3.31                  | 3                        | 2.95                  | 3                        |
| 14030158  | 1.51                  | 2                        | 1.55                  | 2                        | 1.49                  | 1                        | 1.52                  | 2                        |
| 14030159  | 3.05                  | 3                        | 2.21                  | 2                        | 2.69                  | 3                        | 2.65                  | 3                        |
| 14030160  | 2.65                  | 3                        | 2.37                  | 2                        | 2.76                  | 3                        | 2.59                  | 3                        |
| 14030163  | 3.66                  | 4                        | 3.58                  | 4                        | 4.03                  | 4                        | 3.75                  | 4                        |
| 14030165  | 1.18                  | 1                        | 1.24                  | 1                        | 1.11                  | 1                        | 1.18                  | 1                        |
| 14030169  | 1.44                  | 1                        | 1.28                  | 1                        | 1.14                  | 1                        | 1.29                  | 1                        |
| 14030170  | 1.67                  | 2                        | 1.52                  | 2                        | 1.48                  | 1                        | 1.56                  | 2                        |

| Sample ID | Copy Number           |                          |                       |                          |                       |                          |                       |                          |
|-----------|-----------------------|--------------------------|-----------------------|--------------------------|-----------------------|--------------------------|-----------------------|--------------------------|
|           | r = 1                 |                          | r = 2                 |                          | r = 3                 |                          | Average               |                          |
|           | Ratio<br>(target/ref) | Estimated<br>Copy Number |
| 14030171  | 13.35                 | 13                       | 12.31                 | 12                       | 11.48                 | 11                       | 12.38                 | 12                       |
| 14030181  | 12.75                 | 13                       | 7.77                  | 8                        | 7.11                  | 7                        | 9.21                  | 9                        |
| 14030185  | 1.61                  | 2                        | 1.73                  | 2                        | 1.81                  | 2                        | 1.72                  | 2                        |
| 14030187  | 1.75                  | 2                        | 1.61                  | 2                        | 1.78                  | 2                        | 1.71                  | 2                        |
| 14030188  | 0.98                  | 1                        | 1.28                  | 1                        | 0.94                  | 1                        | 1.07                  | 1                        |
| 14030194  | 2.85                  | 3                        | 2.84                  | 3                        | 3.24                  | 3                        | 2.98                  | 3                        |
| 14030198  | 1.38                  | 1                        | 1.69                  | 2                        | 1.52                  | 2                        | 1.53                  | 2                        |
| 14030200  | 1.61                  | 2                        | 1.88                  | 2                        | 2.32                  | 2                        | 1.93                  | 2                        |
| 14030201  | 1.69                  | 2                        | 1.87                  | 2                        | 2.00                  | 2                        | 1.85                  | 2                        |
| 14030204  | 5.67                  | 6                        | 6.58                  | 7                        | 6.85                  | 7                        | 6.37                  | 6                        |
| 14030206  | 1.75                  | 2                        | 1.75                  | 2                        | 1.91                  | 2                        | 1.80                  | 2                        |
| 14030208  | 1.93                  | 2                        | 2.28                  | 2                        | 1.66                  | 2                        | 1.96                  | 2                        |
| 14030210  | 2.46                  | 2                        | 2.22                  | 2                        | 2.45                  | 2                        | 2.38                  | 2                        |
| 14030218  | 10.49                 | 10                       | 10.08                 | 10                       | 9.88                  | 10                       | 10.15                 | 10                       |
| 14030222  | 5.29                  | 5                        | 5.16                  | 5                        | 4.80                  | 5                        | 5.08                  | 5                        |
| 14030227  | 3.11                  | 3                        | 3.47                  | 3                        | 3.04                  | 3                        | 3.21                  | 3                        |
| 14030228  | 1.69                  | 2                        | 1.67                  | 2                        | 1.59                  | 2                        | 1.65                  | 2                        |
| 14030232  | 1.87                  | 2                        | 1.82                  | 2                        | 2.02                  | 2                        | 1.90                  | 2                        |
| 14030234  | 3.20                  | 3                        | 2.99                  | 3                        | 2.79                  | 3                        | 2.99                  | 3                        |

| Sample ID | Copy Number           |                          |                       |                          |                       |                          |                       |                          |
|-----------|-----------------------|--------------------------|-----------------------|--------------------------|-----------------------|--------------------------|-----------------------|--------------------------|
|           | r = 1                 |                          | r = 2                 |                          | r = 3                 |                          | Average               |                          |
|           | Ratio<br>(target/ref) | Estimated<br>Copy Number |
| 14030236  | 2.71                  | 3                        | 3.65                  | 4                        | 2.60                  | 3                        | 2.99                  | 3                        |
| 14030240  | 7.46                  | 7                        | 6.54                  | 7                        | 7.48                  | 7                        | 7.16                  | 7                        |
| 14030245  | 0.85                  | 1                        | 0.81                  | 1                        | 0.87                  | 1                        | 0.84                  | 1                        |
| 14030248  | 5.26                  | 5                        | 4.27                  | 4                        | 4.87                  | 5                        | 4.80                  | 5                        |
| 14030250  | 5.61                  | 6                        | 4.69                  | 5                        | 4.22                  | 4                        | 4.84                  | 5                        |
| 14030267  | 0.37                  | 0                        | 0.39                  | 0                        | 0.34                  | 0                        | 0.37                  | 0                        |
| 14030268  | 2.03                  | 2                        | 1.74                  | 2                        | 1.94                  | 2                        | 1.90                  | 2                        |
| 14030274  | 3.42                  | 3                        | 3.12                  | 3                        | 3.02                  | 3                        | 3.19                  | 3                        |
| 14030276  | 0.25                  | 0                        | 0.28                  | 0                        | 0.23                  | 0                        | 0.25                  | 0                        |
| 14030279  | 0.71                  | 1                        | 0.75                  | 1                        | 0.73                  | 1                        | 0.73                  | 1                        |
| 14030287  | 1.44                  | 1                        | 1.20                  | 1                        | 1.27                  | 1                        | 1.30                  | 1                        |
| 14030303  | 3.99                  | 4                        | 4.49                  | 4                        | 4.12                  | 4                        | 4.20                  | 4                        |
| 14030310  | 2.71                  | 3                        | 2.64                  | 3                        | 2.59                  | 3                        | 2.65                  | 3                        |
| 14030314  | 2.76                  | 3                        | 3.23                  | 3                        | 3.05                  | 3                        | 3.01                  | 3                        |
| 14030315  | 5.60                  | 6                        | 4.69                  | 5                        | 5.61                  | 6                        | 5.30                  | 5                        |
| 14030319  | 2.38                  | 2                        | 2.96                  | 3                        | 3.45                  | 3                        | 2.93                  | 3                        |
| 14030322  | 0.13                  | 0                        | 0.11                  | 0                        | 0.08                  | 0                        | 0.11                  | 0                        |
| 14030333  | 0.97                  | 1                        | 1.09                  | 1                        | 1.11                  | 1                        | 1.06                  | 1                        |
| 14030335  | 1.06                  | 1                        | 1.02                  | 1                        | 1.11                  | 1                        | 1.06                  | 1                        |

| Sample ID | Copy Number           |                          |                       |                          |                       |                          |                       |                          |
|-----------|-----------------------|--------------------------|-----------------------|--------------------------|-----------------------|--------------------------|-----------------------|--------------------------|
|           | r = 1                 |                          | r = 2                 |                          | r = 3                 |                          | Average               |                          |
|           | Ratio<br>(target/ref) | Estimated<br>Copy Number |
| 14030336  | 0.87                  | 1                        | 0.84                  | 1                        | 1.03                  | 1                        | 0.91                  | 1                        |
| 14030343  | 1.60                  | 2                        | 1.72                  | 2                        | 1.69                  | 2                        | 1.67                  | 2                        |
| 14030351  | 0.92                  | 1                        | 0.96                  | 1                        | 0.89                  | 1                        | 0.92                  | 1                        |
| 14030352  | 2.17                  | 2                        | 2.04                  | 2                        | 2.39                  | 2                        | 2.20                  | 2                        |
| 14030353  | 0.01                  | 0                        | 0.01                  | 0                        | 0.00                  | 0                        | 0.01                  | 0                        |
| 14030355  | 15.29                 | 15                       | 14.62                 | 15                       | 16.86                 | 17                       | 15.59                 | 16                       |
| 14030357  | 5.37                  | 5                        | 4.98                  | 5                        | 4.74                  | 5                        | 5.03                  | 5                        |
| 14030360  | 2.44                  | 2                        | 2.67                  | 3                        | 2.87                  | 3                        | 2.66                  | 3                        |
| 14030361  | 2.96                  | 3                        | 2.93                  | 3                        | 2.90                  | 3                        | 2.93                  | 3                        |
| 14030364  | 6.83                  | 7                        | 6.96                  | 7                        | 7.00                  | 7                        | 6.93                  | 7                        |
| 14030367  | 2.17                  | 2                        | 2.09                  | 2                        | 1.95                  | 2                        | 2.07                  | 2                        |
| 14030368  | 4.60                  | 5                        | 4.07                  | 4                        | 4.75                  | 5                        | 4.47                  | 4                        |
| 14030369  | 10.67                 | 11                       | 13.15                 | 13                       | 14.95                 | 15                       | 12.92                 | 13                       |
| 14030382  | 2.88                  | 3                        | 3.01                  | 3                        | 3.35                  | 3                        | 3.08                  | 3                        |
| 14030391  | 3.37                  | 3                        | 3.50                  | 4                        | 4.18                  | 4                        | 3.68                  | 4                        |
| 14030403  | 2.36                  | 2                        | 2.05                  | 2                        | 2.21                  | 2                        | 2.21                  | 2                        |
| 14030411  | 0.95                  | 1                        | 1.25                  | 1                        | 1.05                  | 1                        | 1.08                  | 1                        |
| 14030419  | 0.01                  | 0                        | 0.00                  | 0                        | 0.01                  | 0                        | 0.01                  | 0                        |
| 14030420  | 0.01                  | 0                        | 0.01                  | 0                        | 0.02                  | 0                        | 0.01                  | 0                        |

| Sample ID | Copy Number           |                          |                       |                          |                       |                          |                       |                          |
|-----------|-----------------------|--------------------------|-----------------------|--------------------------|-----------------------|--------------------------|-----------------------|--------------------------|
|           | r = 1                 |                          | r = 2                 |                          | r = 3                 |                          | Average               |                          |
|           | Ratio<br>(target/ref) | Estimated<br>Copy Number |
| 14030427  | 2.15                  | 2                        | 2.00                  | 2                        | 1.74                  | 2                        | 1.96                  | 2                        |
| 14030436  | 3.84                  | 4                        | 3.92                  | 4                        | 3.73                  | 4                        | 3.83                  | 4                        |
| 14030439  | 2.48                  | 2                        | 2.23                  | 2                        | 2.16                  | 2                        | 2.29                  | 2                        |
| 14030452  | 4.91                  | 5                        | 4.61                  | 5                        | 5.01                  | 5                        | 4.84                  | 5                        |
| 14030453  | 6.81                  | 7                        | 5.17                  | 5                        | 4.69                  | 5                        | 5.56                  | 6                        |
| 14030489  | 2.49                  | 2                        | 2.38                  | 2                        | 2.24                  | 2                        | 2.37                  | 2                        |
| 14030493  | 0.87                  | 1                        | 1.09                  | 1                        | 1.09                  | 1                        | 1.02                  | 1                        |
| 14030495  | 3.09                  | 3                        | 2.79                  | 3                        | 3.25                  | 3                        | 3.04                  | 3                        |
| 14030498  | 3.54                  | 4                        | 3.25                  | 3                        | 3.67                  | 4                        | 3.49                  | 3                        |
| 14030501  | 0.99                  | 1                        | 1.11                  | 1                        | 0.98                  | 1                        | 1.03                  | 1                        |
| 14030505  | 3.70                  | 4                        | 3.62                  | 4                        | 3.14                  | 3                        | 3.49                  | 3                        |
| 14030507  | 3.70                  | 4                        | 3.75                  | 4                        | 3.37                  | 3                        | 3.60                  | 4                        |
| 14030509  | 1.45                  | 1                        | 1.50                  | 2                        | 1.52                  | 2                        | 1.49                  | 1                        |
| 14030512  | 1.74                  | 2                        | 1.62                  | 2                        | 1.64                  | 2                        | 1.66                  | 2                        |
| 14030513  | 1.30                  | 1                        | 1.31                  | 1                        | 1.40                  | 1                        | 1.34                  | 1                        |
| 14030515  | 1.95                  | 2                        | 1.92                  | 2                        | 1.90                  | 2                        | 1.92                  | 2                        |
| 14030516  | 2.10                  | 2                        | 1.99                  | 2                        | 2.38                  | 2                        | 2.16                  | 2                        |
| 14030520  | 6.17                  | 6                        | 5.43                  | 5                        | 5.72                  | 6                        | 5.77                  | 6                        |
| 14030521  | 1.29                  | 1                        | 1.24                  | 1                        | 1.26                  | 1                        | 1.26                  | 1                        |

| Sample ID | Copy Number           |                          |                       |                          |                       |                          |                       |                          |
|-----------|-----------------------|--------------------------|-----------------------|--------------------------|-----------------------|--------------------------|-----------------------|--------------------------|
|           | r = 1                 |                          | r = 2                 |                          | r = 3                 |                          | Average               |                          |
|           | Ratio<br>(target/ref) | Estimated<br>Copy Number |
| 14030532  | 2.06                  | 2                        | 2.09                  | 2                        | 2.14                  | 2                        | 2.10                  | 2                        |
| 14030533  | 1.28                  | 1                        | 1.38                  | 1                        | 1.24                  | 1                        | 1.30                  | 1                        |
| 14030536  | 1.17                  | 1                        | 1.03                  | 1                        | 1.07                  | 1                        | 1.09                  | 1                        |
| 14030539  | 4.45                  | 4                        | 2.90                  | 3                        | 3.44                  | 3                        | 3.59                  | 4                        |
| 14030540  | 6.24                  | 6                        | 5.09                  | 5                        | 5.14                  | 5                        | 5.49                  | 5                        |
| 14030543  | 1.16                  | 1                        | 1.13                  | 1                        | 1.07                  | 1                        | 1.12                  | 1                        |
| 14030544  | 1.08                  | 1                        | 1.12                  | 1                        | 1.09                  | 1                        | 1.10                  | 1                        |
| 14030546  | 2.26                  | 2                        | 2.11                  | 2                        | 1.88                  | 2                        | 2.09                  | 2                        |
| 14030547  | 3.30                  | 3                        | 3.20                  | 3                        | 3.27                  | 3                        | 3.26                  | 3                        |
| 14030548  | 9.88                  | 10                       | 8.89                  | 9                        | 9.10                  | 9                        | 9.29                  | 9                        |
| 14030557  | 1.30                  | 1                        | 1.37                  | 1                        | 1.45                  | 1                        | 1.37                  | 1                        |
| 14030558  | 1.17                  | 1                        | 1.09                  | 1                        | 1.23                  | 1                        | 1.16                  | 1                        |
| 14030559  | 0.71                  | 1                        | 1.16                  | 1                        | 1.18                  | 1                        | 1.02                  | 1                        |
| 14030560  | 2.15                  | 2                        | 1.67                  | 2                        | 1.85                  | 2                        | 1.89                  | 2                        |
| 14030561  | 1.32                  | 1                        | 1.37                  | 1                        | 1.61                  | 2                        | 1.43                  | 1                        |
| 14030562  | 1.82                  | 2                        | 1.78                  | 2                        | 1.61                  | 2                        | 1.74                  | 2                        |
| 14030564  | 1.55                  | 2                        | 1.47                  | 1                        | 1.49                  | 1                        | 1.51                  | 2                        |
| 14030567  | 2.61                  | 3                        | 2.62                  | 3                        | 2.58                  | 3                        | 2.61                  | 3                        |
| 14030569  | 2.98                  | 3                        | 2.94                  | 3                        | 3.07                  | 3                        | 3.00                  | 3                        |

| Sample ID | Copy Number           |                          |                       |                          |                       |                          |                       |                          |
|-----------|-----------------------|--------------------------|-----------------------|--------------------------|-----------------------|--------------------------|-----------------------|--------------------------|
|           | r = 1                 |                          | r = 2                 |                          | r = 3                 |                          | Average               |                          |
|           | Ratio<br>(target/ref) | Estimated<br>Copy Number |
| 14030570  | 2.08                  | 2                        | 2.05                  | 2                        | 2.14                  | 2                        | 2.09                  | 2                        |
| 14030571  | 1.10                  | 1                        | 1.48                  | 1                        | 1.63                  | 2                        | 1.41                  | 1                        |
| 14030573  | 3.42                  | 3                        | 3.25                  | 3                        | 3.69                  | 4                        | 3.45                  | 3                        |
| 14030582  | 1.99                  | 2                        | 2.07                  | 2                        | 1.87                  | 2                        | 1.98                  | 2                        |
| 14030583  | 2.22                  | 2                        | 2.52                  | 3                        | 2.92                  | 3                        | 2.55                  | 3                        |
| 14030584  | 1.38                  | 1                        | 1.46                  | 1                        | 1.38                  | 1                        | 1.41                  | 1                        |
| 14030585  | 1.02                  | 1                        | 0.91                  | 1                        | 0.93                  | 1                        | 0.95                  | 1                        |
| 14030586  | 2.35                  | 2                        | 2.21                  | 2                        | 1.94                  | 2                        | 2.17                  | 2                        |
| 14030588  | 3.32                  | 3                        | 3.58                  | 4                        | 3.43                  | 3                        | 3.44                  | 3                        |
| 14030589  | 1.14                  | 1                        | 1.33                  | 1                        | 1.54                  | 2                        | 1.34                  | 1                        |
| 14030591  | 2.40                  | 2                        | 2.52                  | 3                        | 2.78                  | 3                        | 2.57                  | 3                        |
| 14030593  | 1.89                  | 2                        | 1.93                  | 2                        | 1.94                  | 2                        | 1.92                  | 2                        |
| 14030595  | 1.96                  | 2                        | 1.94                  | 2                        | 1.88                  | 2                        | 1.93                  | 2                        |
| 14030597  | 3.19                  | 3                        | 2.80                  | 3                        | 2.40                  | 2                        | 2.79                  | 3                        |
| 14030601  | 1.19                  | 1                        | 1.18                  | 1                        | 1.13                  | 1                        | 1.17                  | 1                        |
| 14030607  | 5.58                  | 6                        | 5.28                  | 5                        | 4.45                  | 4                        | 5.10                  | 5                        |
| 14030608  | 1.87                  | 2                        | 1.78                  | 2                        | 1.65                  | 2                        | 1.77                  | 2                        |
| 14030611  | 2.85                  | 3                        | 2.95                  | 3                        | 2.71                  | 3                        | 2.84                  | 3                        |
| 14030612  | 1.38                  | 1                        | 1.43                  | 1                        | 1.23                  | 1                        | 1.35                  | 1                        |



| Sample ID | Copy Number           |                          |                       |                          |                       |                          |                       |                          |
|-----------|-----------------------|--------------------------|-----------------------|--------------------------|-----------------------|--------------------------|-----------------------|--------------------------|
|           | r = 1                 |                          | r = 2                 |                          | r = 3                 |                          | Average               |                          |
|           | Ratio<br>(target/ref) | Estimated<br>Copy Number |
| 14030618  | 4.72                  | 5                        | 4.35                  | 4                        | 4.47                  | 4                        | 4.51                  | 5                        |
| 14030619  | 2.27                  | 2                        | 2.44                  | 2                        | 2.04                  | 2                        | 2.25                  | 2                        |
| 14030620  | 2.41                  | 2                        | 1.88                  | 2                        | 1.91                  | 2                        | 2.07                  | 2                        |
| 14030621  | 2.84                  | 3                        | 2.52                  | 3                        | 2.32                  | 2                        | 2.56                  | 3                        |
| 14030623  | 3.04                  | 3                        | 2.79                  | 3                        | 2.45                  | 2                        | 2.76                  | 3                        |
| 14030624  | 2.01                  | 2                        | 1.79                  | 2                        | 1.63                  | 2                        | 1.81                  | 2                        |
| 14030625  | 1.11                  | 1                        | 1.33                  | 1                        | 1.22                  | 1                        | 1.22                  | 1                        |
| 14030626  | 2.93                  | 3                        | 3.06                  | 3                        | 3.09                  | 3                        | 3.03                  | 3                        |
| 14030653  | 2.90                  | 3                        | 2.47                  | 2                        | 2.76                  | 3                        | 2.71                  | 3                        |
| 14030654  | 2.23                  | 2                        | 1.92                  | 2                        | 2.20                  | 2                        | 2.11                  | 2                        |
| 14030655  | 1.14                  | 1                        | 1.22                  | 1                        | 1.05                  | 1                        | 1.14                  | 1                        |
| 14030658  | 4.72                  | 5                        | 6.37                  | 6                        | 4.63                  | 5                        | 5.24                  | 5                        |
| 14030660  | 6.83                  | 7                        | 6.06                  | 6                        | 4.92                  | 5                        | 5.94                  | 6                        |
| 14030664  | 2.36                  | 2                        | 2.50                  | 2                        | 2.49                  | 2                        | 2.45                  | 2                        |
| 14030665  | 2.48                  | 2                        | 2.48                  | 2                        | 2.69                  | 3                        | 2.55                  | 3                        |
| 14030666  | 6.07                  | 6                        | 7.99                  | 8                        | 9.29                  | 9                        | 7.79                  | 8                        |
| 14030667  | 1.16                  | 1                        | 1.16                  | 1                        | 1.24                  | 1                        | 1.19                  | 1                        |
| 14030668  | 1.19                  | 1                        | 1.23                  | 1                        | 1.20                  | 1                        | 1.20                  | 1                        |
| 14030670  | 6.04                  | 6                        | 3.84                  | 4                        | 4.64                  | 5                        | 4.84                  | 5                        |

| Sample ID | Copy Number           |                          |                       |                          |                       |                          |                       |                          |
|-----------|-----------------------|--------------------------|-----------------------|--------------------------|-----------------------|--------------------------|-----------------------|--------------------------|
|           | r = 1                 |                          | r = 2                 |                          | r = 3                 |                          | Average               |                          |
|           | Ratio<br>(target/ref) | Estimated<br>Copy Number |
| 14030671  | 0.69                  | 1                        | 0.74                  | 1                        | 0.77                  | 1                        | 0.74                  | 1                        |
| 14030674  | 1.69                  | 2                        | 1.49                  | 1                        | 1.55                  | 2                        | 1.58                  | 2                        |
| 14030675  | 1.45                  | 1                        | 1.27                  | 1                        | 1.32                  | 1                        | 1.35                  | 1                        |
| 14030677  | 5.99                  | 6                        | 4.84                  | 5                        | 5.38                  | 5                        | 5.40                  | 5                        |
| 14030682  | 1.26                  | 1                        | 1.18                  | 1                        | 1.24                  | 1                        | 1.22                  | 1                        |
| 14030683  | 1.22                  | 1                        | 1.18                  | 1                        | 1.09                  | 1                        | 1.16                  | 1                        |
| 14030684  | 2.92                  | 3                        | 2.50                  | 3                        | 2.54                  | 3                        | 2.65                  | 3                        |
| 14030686  | 1.06                  | 1                        | 1.29                  | 1                        | 1.17                  | 1                        | 1.17                  | 1                        |
| 14030689  | 4.72                  | 5                        | 5.02                  | 5                        | 5.17                  | 5                        | 4.97                  | 5                        |
| 14030694  | 2.70                  | 3                        | 2.75                  | 3                        | 2.41                  | 2                        | 2.62                  | 3                        |
| 14030695  | 2.53                  | 3                        | 2.68                  | 3                        | 3.52                  | 4                        | 2.91                  | 3                        |
| 14030700  | 21.51                 | 22                       | 21.59                 | 22                       | 21.02                 | 21                       | 21.37                 | 21                       |
| 14030711  | 2.54                  | 3                        | 2.46                  | 2                        | 2.30                  | 2                        | 2.43                  | 2                        |
| 14030714  | 2.13                  | 2                        | 2.40                  | 2                        | 2.20                  | 2                        | 2.25                  | 2                        |
| 14030715  | 5.62                  | 6                        | 6.21                  | 6                        | 5.28                  | 5                        | 5.70                  | 6                        |
| 14030720  | 1.22                  | 1                        | 1.17                  | 1                        | 1.13                  | 1                        | 1.18                  | 1                        |
| 14030721  | 3.13                  | 3                        | 2.97                  | 3                        | 3.20                  | 3                        | 3.10                  | 3                        |
| 14030722  | 1.55                  | 2                        | 1.25                  | 1                        | 1.42                  | 1                        | 1.40                  | 1                        |
| 14030723  | 1.57                  | 2                        | 1.11                  | 1                        | 1.18                  | 1                        | 1.29                  | 1                        |

| Sample ID | Copy Number           |                          |                       |                          |                       |                          |                       |                          |
|-----------|-----------------------|--------------------------|-----------------------|--------------------------|-----------------------|--------------------------|-----------------------|--------------------------|
|           | r = 1                 |                          | r = 2                 |                          | r = 3                 |                          | Average               |                          |
|           | Ratio<br>(target/ref) | Estimated<br>Copy Number |
| 14030724  | 3.87                  | 4                        | 3.44                  | 3                        | 3.41                  | 3                        | 3.57                  | 4                        |
| 14030725  | 2.73                  | 3                        | 2.57                  | 3                        | 2.91                  | 3                        | 2.74                  | 3                        |
| 14030726  | 2.13                  | 2                        | 2.17                  | 2                        | 2.18                  | 2                        | 2.16                  | 2                        |
| 14030727  | 2.01                  | 2                        | 2.35                  | 2                        | 2.00                  | 2                        | 2.12                  | 2                        |
| 14030728  | 1.66                  | 2                        | 1.86                  | 2                        | 1.97                  | 2                        | 1.83                  | 2                        |
| 14030729  | 2.86                  | 3                        | 3.15                  | 3                        | 4.16                  | 4                        | 3.39                  | 3                        |
| 14030730  | 4.66                  | 5                        | 4.64                  | 5                        | 4.47                  | 4                        | 4.59                  | 5                        |
| 14030731  | 2.08                  | 2                        | 2.24                  | 2                        | 2.18                  | 2                        | 2.16                  | 2                        |
| 14030732  | 9.78                  | 10                       | 9.51                  | 10                       | 9.84                  | 10                       | 9.71                  | 10                       |
| 14030733  | 2.04                  | 2                        | 1.81                  | 2                        | 1.68                  | 2                        | 1.84                  | 2                        |
| 14030734  | 4.58                  | 5                        | 4.21                  | 4                        | 4.75                  | 5                        | 4.51                  | 5                        |
| 14030735  | 3.81                  | 4                        | 3.97                  | 4                        | 3.88                  | 4                        | 3.89                  | 4                        |
| 14030736  | 1.88                  | 2                        | 2.03                  | 2                        | 2.03                  | 2                        | 1.98                  | 2                        |
| 14030737  | 0.85                  | 1                        | 0.78                  | 1                        | 0.91                  | 1                        | 0.85                  | 1                        |
| 14030738  | 1.15                  | 1                        | 1.14                  | 1                        | 1.10                  | 1                        | 1.13                  | 1                        |
| 14030739  | 1.45                  | 1                        | 1.48                  | 1                        | 1.56                  | 2                        | 1.50                  | 1                        |
| 14030740  | 2.01                  | 2                        | 2.31                  | 2                        | 2.42                  | 2                        | 2.25                  | 2                        |
| 14030741  | 4.17                  | 4                        | 4.31                  | 4                        | 4.34                  | 4                        | 4.27                  | 4                        |
| 14030742  | 0.50                  | 1                        | 0.53                  | 1                        | 0.44                  | 0                        | 0.49                  | 0                        |

| Sample ID | Copy Number           |                          |                       |                          |                       |                          |                       |                          |
|-----------|-----------------------|--------------------------|-----------------------|--------------------------|-----------------------|--------------------------|-----------------------|--------------------------|
|           | r = 1                 |                          | r = 2                 |                          | r = 3                 |                          | Average               |                          |
|           | Ratio<br>(target/ref) | Estimated<br>Copy Number |
| 14030743  | 1.00                  | 1                        | 1.03                  | 1                        | 1.00                  | 1                        | 1.01                  | 1                        |
| 14030744  | 1.65                  | 2                        | 1.20                  | 1                        | 1.61                  | 2                        | 1.49                  | 1                        |
| 14030745  | 0.99                  | 1                        | 0.90                  | 1                        | 0.94                  | 1                        | 0.94                  | 1                        |
| 14030746  | 1.86                  | 2                        | 2.02                  | 2                        | 1.99                  | 2                        | 1.96                  | 2                        |
| 14030747  | 2.76                  | 3                        | 3.04                  | 3                        | 2.94                  | 3                        | 2.91                  | 3                        |
| 14030748  | 0.59                  | 1                        | 0.54                  | 1                        | 0.62                  | 1                        | 0.58                  | 1                        |
| 14030749  | 2.81                  | 3                        | 2.90                  | 3                        | 3.37                  | 3                        | 3.03                  | 3                        |
| 14030750  | 1.65                  | 2                        | 1.99                  | 2                        | 2.05                  | 2                        | 1.90                  | 2                        |
| 14030751  | 0.99                  | 1                        | 0.99                  | 1                        | 0.88                  | 1                        | 0.95                  | 1                        |
| 14030752  | 1.04                  | 1                        | 0.82                  | 1                        | 0.86                  | 1                        | 0.91                  | 1                        |
| 14030753  | 0.53                  | 1                        | 0.45                  | 0                        | 0.55                  | 1                        | 0.51                  | 1                        |
| 14030754  | 1.07                  | 1                        | 0.98                  | 1                        | 1.26                  | 1                        | 1.10                  | 1                        |
| 14030755  | 1.16                  | 1                        | 1.03                  | 1                        | 1.11                  | 1                        | 1.10                  | 1                        |
| 14030756  | 1.17                  | 1                        | 1.19                  | 1                        | 1.02                  | 1                        | 1.12                  | 1                        |
| 14030757  | 1.55                  | 2                        | 1.69                  | 2                        | 1.60                  | 2                        | 1.61                  | 2                        |
| 14030758  | 2.56                  | 3                        | 2.56                  | 3                        | 2.62                  | 3                        | 2.58                  | 3                        |
| 14030759  | 0.31                  | 0                        | 0.22                  | 0                        | 0.24                  | 0                        | 0.26                  | 0                        |
| 14030760  | 1.88                  | 2                        | 2.05                  | 2                        | 1.85                  | 2                        | 1.93                  | 2                        |
| 14030761  | 1.58                  | 2                        | 1.72                  | 2                        | 1.87                  | 2                        | 1.72                  | 2                        |

| Sample ID | Copy Number           |                          |                       |                          |                       |                          |                       |                          |
|-----------|-----------------------|--------------------------|-----------------------|--------------------------|-----------------------|--------------------------|-----------------------|--------------------------|
|           | r = 1                 |                          | r = 2                 |                          | r = 3                 |                          | Average               |                          |
|           | Ratio<br>(target/ref) | Estimated<br>Copy Number |
| 14030762  | 2.15                  | 2                        | 2.09                  | 2                        | 2.02                  | 2                        | 2.09                  | 2                        |
| 14030763  | 5.09                  | 5                        | 5.00                  | 5                        | 5.05                  | 5                        | 5.05                  | 5                        |
| 14030764  | 1.29                  | 1                        | 1.04                  | 1                        | 1.31                  | 1                        | 1.21                  | 1                        |
| 14030765  | 1.15                  | 1                        | 1.40                  | 1                        | 1.63                  | 2                        | 1.39                  | 1                        |
| 14030766  | 0.97                  | 1                        | 1.03                  | 1                        | 0.98                  | 1                        | 0.99                  | 1                        |
| 14030767  | 1.06                  | 1                        | 0.99                  | 1                        | 1.06                  | 1                        | 1.04                  | 1                        |
| 14030768  | 2.81                  | 3                        | 3.23                  | 3                        | 3.11                  | 3                        | 3.05                  | 3                        |
| 14030769  | 4.08                  | 4                        | 3.99                  | 4                        | 4.17                  | 4                        | 4.08                  | 4                        |
| 14030770  | 3.76                  | 4                        | 4.25                  | 4                        | 4.65                  | 5                        | 4.22                  | 4                        |
| 14030771  | 0.48                  | 0                        | 0.51                  | 1                        | 0.58                  | 1                        | 0.53                  | 1                        |
| 14030772  | 0.81                  | 1                        | 1.02                  | 1                        | 1.10                  | 1                        | 0.98                  | 1                        |
| 14030773  | 7.53                  | 8                        | 6.94                  | 7                        | 6.69                  | 7                        | 7.05                  | 7                        |
| 14030774  | 7.04                  | 7                        | 7.32                  | 7                        | 6.67                  | 7                        | 7.01                  | 7                        |
| 14030775  | 8.38                  | 8                        | 7.04                  | 7                        | 6.32                  | 6                        | 7.24                  | 7                        |
| 14030776  | 1.64                  | 2                        | 5.62                  | 6                        | 5.86                  | 6                        | 4.38                  | 4                        |
| 14030777  | 4.77                  | 5                        | 5.03                  | 5                        | 4.59                  | 5                        | 4.80                  | 5                        |
| 14030778  | 4.50                  | 5                        | 4.73                  | 5                        | 4.49                  | 4                        | 4.58                  | 5                        |
| 14030779  | 3.23                  | 3                        | 3.47                  | 3                        | 2.99                  | 3                        | 3.23                  | 3                        |
| 14030780  | 0.99                  | 1                        | 0.94                  | 1                        | 1.05                  | 1                        | 1.00                  | 1                        |

| Sample ID | Copy Number           |                          |                       |                          |                       |                          |                       |                          |
|-----------|-----------------------|--------------------------|-----------------------|--------------------------|-----------------------|--------------------------|-----------------------|--------------------------|
|           | r = 1                 |                          | r = 2                 |                          | r = 3                 |                          | Average               |                          |
|           | Ratio<br>(target/ref) | Estimated<br>Copy Number |
| 14030781  | 2.25                  | 2                        | 2.26                  | 2                        | 2.14                  | 2                        | 2.21                  | 2                        |
| 14030782  | 1.14                  | 1                        | 1.15                  | 1                        | 1.10                  | 1                        | 1.13                  | 1                        |
| 14030783  | 5.15                  | 5                        | 3.75                  | 4                        | 4.41                  | 4                        | 4.44                  | 4                        |
| 14030784  | 1.18                  | 1                        | 0.96                  | 1                        | 1.12                  | 1                        | 1.08                  | 1                        |
| 14030785  | 2.26                  | 2                        | 2.30                  | 2                        | 2.21                  | 2                        | 2.26                  | 2                        |
| 14030786  | 1.31                  | 1                        | 1.32                  | 1                        | 1.28                  | 1                        | 1.30                  | 1                        |
| 14030787  | 1.18                  | 1                        | 1.03                  | 1                        | 1.09                  | 1                        | 1.10                  | 1                        |
| 14030788  | 2.36                  | 2                        | 2.42                  | 2                        | 2.20                  | 2                        | 2.32                  | 2                        |
| 14030789  | 2.65                  | 3                        | 2.65                  | 3                        | 2.72                  | 3                        | 2.67                  | 3                        |
| 14030790  | 1.05                  | 1                        | 1.12                  | 1                        | 1.06                  | 1                        | 1.08                  | 1                        |
| 14030791  | 2.18                  | 2                        | 2.41                  | 2                        | 1.49                  | 1                        | 2.03                  | 2                        |
| 14030792  | 1.77                  | 2                        | 1.27                  | 1                        | 1.36                  | 1                        | 1.47                  | 1                        |
| 14030793  | 5.04                  | 5                        | 4.70                  | 5                        | 4.56                  | 5                        | 4.77                  | 5                        |
| 14030794  | 2.50                  | 2                        | 2.08                  | 2                        | 2.15                  | 2                        | 2.24                  | 2                        |
| 14030795  | 2.93                  | 3                        | 2.94                  | 3                        | 2.94                  | 3                        | 2.94                  | 3                        |
| 14030796  | 1.96                  | 2                        | 2.02                  | 2                        | 1.87                  | 2                        | 1.95                  | 2                        |
| 14030797  | 1.08                  | 1                        | 1.06                  | 1                        | 1.44                  | 1                        | 1.19                  | 1                        |
| 14030798  | 1.30                  | 1                        | 1.54                  | 2                        | 1.33                  | 1                        | 1.39                  | 1                        |
| 14030799  | 2.26                  | 2                        | 2.31                  | 2                        | 2.22                  | 2                        | 2.26                  | 2                        |

| Sample ID | Copy Number           |                          |                       |                          |                       |                          |                       |                          |
|-----------|-----------------------|--------------------------|-----------------------|--------------------------|-----------------------|--------------------------|-----------------------|--------------------------|
|           | r = 1                 |                          | r = 2                 |                          | r = 3                 |                          | Average               |                          |
|           | Ratio<br>(target/ref) | Estimated<br>Copy Number |
| 14030800  | 2.38                  | 2                        | 1.50                  | 2                        | 1.91                  | 2                        | 1.93                  | 2                        |
| 14030801  | 2.03                  | 2                        | 1.90                  | 2                        | 2.06                  | 2                        | 2.00                  | 2                        |
| 14030802  | 5.03                  | 5                        | 4.57                  | 5                        | 4.83                  | 5                        | 4.81                  | 5                        |
| 14030803  | 5.55                  | 6                        | 5.33                  | 5                        | 5.37                  | 5                        | 5.42                  | 5                        |
| 14030804  | 5.11                  | 5                        | 5.57                  | 6                        | 4.77                  | 5                        | 5.15                  | 5                        |
| 14030805  | 3.48                  | 3                        | 2.97                  | 3                        | 3.12                  | 3                        | 3.19                  | 3                        |
| 14030806  | 5.31                  | 5                        | 4.31                  | 4                        | 4.41                  | 4                        | 4.68                  | 5                        |
| 14030807  | 1.03                  | 1                        | 0.95                  | 1                        | 0.97                  | 1                        | 0.98                  | 1                        |
| 14030808  | 11.61                 | 12                       | 11.82                 | 12                       | 12.57                 | 13                       | 12.00                 | 12                       |
| 14030809  | 11.63                 | 12                       | 11.70                 | 12                       | 10.05                 | 10                       | 11.13                 | 11                       |
| 14030810  | 12.39                 | 12                       | 11.20                 | 11                       | 10.88                 | 11                       | 11.49                 | 11                       |
| 14030811  | 2.59                  | 3                        | 3.32                  | 3                        | 3.45                  | 3                        | 3.12                  | 3                        |
| 14030812  | 15.16                 | 15                       | 17.24                 | 17                       | 16.10                 | 16                       | 16.16                 | 16                       |
| 14030813  | 2.94                  | 3                        | 2.79                  | 3                        | 3.01                  | 3                        | 2.91                  | 3                        |
| 14030814  | 2.80                  | 3                        | 2.86                  | 3                        | 2.96                  | 3                        | 2.87                  | 3                        |
| 14030815  | 2.27                  | 2                        | 2.25                  | 2                        | 2.00                  | 2                        | 2.17                  | 2                        |
| 14030816  | 2.13                  | 2                        | 1.86                  | 2                        | 2.01                  | 2                        | 2.00                  | 2                        |
| 14030817  | 1.61                  | 2                        | 1.68                  | 2                        | 1.74                  | 2                        | 1.68                  | 2                        |
| 14030818  | 0.12                  | 0                        | 0.10                  | 0                        | 0.10                  | 0                        | 0.11                  | 0                        |

| Sample ID | Copy Number           |                          |                       |                          |                       |                          |                       |                          |
|-----------|-----------------------|--------------------------|-----------------------|--------------------------|-----------------------|--------------------------|-----------------------|--------------------------|
|           | r = 1                 |                          | r = 2                 |                          | r = 3                 |                          | Average               |                          |
|           | Ratio<br>(target/ref) | Estimated<br>Copy Number |
| 14030819  | 2.88                  | 3                        | 2.74                  | 3                        | 2.76                  | 3                        | 2.79                  | 3                        |
| 14030820  | 1.57                  | 2                        | 1.62                  | 2                        | 1.40                  | 1                        | 1.53                  | 2                        |
| 14030821  | 2.36                  | 2                        | 2.16                  | 2                        | 1.98                  | 2                        | 2.17                  | 2                        |
| 14030822  | 2.28                  | 2                        | 2.08                  | 2                        | 2.50                  | 2                        | 2.29                  | 2                        |
| 14030823  | 2.52                  | 3                        | 2.61                  | 3                        | 2.46                  | 2                        | 2.53                  | 3                        |
| 14030824  | 1.02                  | 1                        | 1.17                  | 1                        | 1.23                  | 1                        | 1.14                  | 1                        |
| 14030825  | 1.05                  | 1                        | 1.01                  | 1                        | 1.07                  | 1                        | 1.04                  | 1                        |
| 14030826  | 1.19                  | 1                        | 0.94                  | 1                        | 1.03                  | 1                        | 1.05                  | 1                        |
| 14030827  | 3.20                  | 3                        | 2.68                  | 3                        | 2.74                  | 3                        | 2.87                  | 3                        |
| 14030828  | 3.67                  | 4                        | 3.04                  | 3                        | 3.09                  | 3                        | 3.27                  | 3                        |
| 14030829  | 1.62                  | 2                        | 2.62                  | 3                        | 2.04                  | 2                        | 2.10                  | 2                        |
| 14030830  | 3.19                  | 3                        | 3.17                  | 3                        | 2.31                  | 2                        | 2.89                  | 3                        |
| 14030831  | 3.84                  | 4                        | 3.81                  | 4                        | 4.38                  | 4                        | 4.01                  | 4                        |
| 14030832  | 1.81                  | 2                        | 1.97                  | 2                        | 2.20                  | 2                        | 1.99                  | 2                        |
| 14030833  | 5.39                  | 5                        | 5.02                  | 5                        | 5.38                  | 5                        | 5.27                  | 5                        |
| 14030834  | 1.06                  | 1                        | 0.93                  | 1                        | 0.96                  | 1                        | 0.98                  | 1                        |
| 14030835  | 3.16                  | 3                        | 2.56                  | 3                        | 2.73                  | 3                        | 2.81                  | 3                        |
| 14030836  | 1.05                  | 1                        | 1.17                  | 1                        | 1.05                  | 1                        | 1.09                  | 1                        |
| 14030837  | 1.85                  | 2                        | 1.86                  | 2                        | 2.23                  | 2                        | 1.98                  | 2                        |



| Sample ID | Copy Number           |                          |                       |                          |                       |                          |                       |                          |
|-----------|-----------------------|--------------------------|-----------------------|--------------------------|-----------------------|--------------------------|-----------------------|--------------------------|
|           | r = 1                 |                          | r = 2                 |                          | r = 3                 |                          | Average               |                          |
|           | Ratio<br>(target/ref) | Estimated<br>Copy Number |
| 14030838  | 3.42                  | 3                        | 3.59                  | 4                        | 3.63                  | 4                        | 3.55                  | 4                        |
| 14030839  | 1.18                  | 1                        | 1.26                  | 1                        | 1.34                  | 1                        | 1.26                  | 1                        |
| 14030840  | 2.82                  | 3                        | 3.44                  | 3                        | 3.49                  | 3                        | 3.25                  | 3                        |
| 14030841  | 1.23                  | 1                        | 1.48                  | 1                        | 1.18                  | 1                        | 1.29                  | 1                        |
| 14030842  | 1.00                  | 1                        | 1.05                  | 1                        | 1.08                  | 1                        | 1.05                  | 1                        |
| 14030843  | 3.12                  | 3                        | 3.09                  | 3                        | 2.99                  | 3                        | 3.07                  | 3                        |
| 14030844  | 2.91                  | 3                        | 3.10                  | 3                        | 3.23                  | 3                        | 3.08                  | 3                        |
| 14030845  | 2.29                  | 2                        | 2.12                  | 2                        | 2.41                  | 2                        | 2.28                  | 2                        |
| 14030846  | 3.90                  | 4                        | 3.59                  | 4                        | 3.80                  | 4                        | 3.77                  | 4                        |
| 14030847  | 1.79                  | 2                        | 1.81                  | 2                        | 1.59                  | 2                        | 1.73                  | 2                        |
| 14030848  | 1.05                  | 1                        | 1.10                  | 1                        | 1.13                  | 1                        | 1.09                  | 1                        |
| 14030849  | 2.20                  | 2                        | 2.35                  | 2                        | 2.30                  | 2                        | 2.28                  | 2                        |
| 14030850  | 3.12                  | 3                        | 3.04                  | 3                        | 2.84                  | 3                        | 3.00                  | 3                        |
| 14030851  | 4.15                  | 4                        | 4.02                  | 4                        | 3.64                  | 4                        | 3.93                  | 4                        |
| 14030852  | 1.64                  | 2                        | 1.45                  | 1                        | 1.33                  | 1                        | 1.47                  | 1                        |
| 14030853  | 2.15                  | 2                        | 2.15                  | 2                        | 2.01                  | 2                        | 2.10                  | 2                        |
| 14030854  | 1.22                  | 1                        | 1.22                  | 1                        | 1.19                  | 1                        | 1.21                  | 1                        |
| 14030855  | 2.12                  | 2                        | 2.48                  | 2                        | 2.22                  | 2                        | 2.27                  | 2                        |
| 14030856  | 5.17                  | 5                        | 5.83                  | 6                        | 6.10                  | 6                        | 5.70                  | 6                        |

| Sample ID | Copy Number           |                          |                       |                          |                       |                          |                       |                          |
|-----------|-----------------------|--------------------------|-----------------------|--------------------------|-----------------------|--------------------------|-----------------------|--------------------------|
|           | r = 1                 |                          | r = 2                 |                          | r = 3                 |                          | Average               |                          |
|           | Ratio<br>(target/ref) | Estimated<br>Copy Number |
| 14030857  | 1.44                  | 1                        | 1.38                  | 1                        | 1.19                  | 1                        | 1.34                  | 1                        |
| 14030858  | 3.21                  | 3                        | 2.78                  | 3                        | 2.63                  | 3                        | 2.87                  | 3                        |
| 14030859  | 1.22                  | 1                        | 1.17                  | 1                        | 1.33                  | 1                        | 1.24                  | 1                        |
| 14030860  | 3.99                  | 4                        | 4.68                  | 5                        | 4.18                  | 4                        | 4.28                  | 4                        |
| 14030861  | 4.21                  | 4                        | 4.10                  | 4                        | 4.58                  | 5                        | 4.30                  | 4                        |
| 14030862  | 1.71                  | 2                        | 1.75                  | 2                        | 1.88                  | 2                        | 1.78                  | 2                        |
| 14030863  | 1.07                  | 1                        | 1.02                  | 1                        | 1.12                  | 1                        | 1.07                  | 1                        |
| 14030864  | 1.73                  | 2                        | 1.70                  | 2                        | 1.69                  | 2                        | 1.71                  | 2                        |
| 14030865  | 1.09                  | 1                        | 1.11                  | 1                        | 0.93                  | 1                        | 1.04                  | 1                        |
| 14030866  | 3.01                  | 3                        | 2.86                  | 3                        | 2.61                  | 3                        | 2.83                  | 3                        |
| 14030867  | 2.57                  | 3                        | 3.06                  | 3                        | 3.11                  | 3                        | 2.91                  | 3                        |
| 14030868  | 1.44                  | 1                        | 1.21                  | 1                        | 1.31                  | 1                        | 1.32                  | 1                        |
| 14030869  | 1.13                  | 1                        | 1.10                  | 1                        | 1.08                  | 1                        | 1.10                  | 1                        |
| 14030870  | 1.74                  | 2                        | 1.66                  | 2                        | 1.34                  | 1                        | 1.58                  | 2                        |
| 14030871  | 11.72                 | 12                       | 11.01                 | 11                       | 11.74                 | 12                       | 11.49                 | 11                       |
| 14030872  | 0.79                  | 1                        | 0.71                  | 1                        | 0.77                  | 1                        | 0.76                  | 1                        |
| 14030873  | 1.19                  | 1                        | 1.14                  | 1                        | 1.16                  | 1                        | 1.16                  | 1                        |
| 14030874  | 2.13                  | 2                        | 2.07                  | 2                        | 2.09                  | 2                        | 2.10                  | 2                        |
| 14030875  | 1.97                  | 2                        | 1.94                  | 2                        | 1.80                  | 2                        | 1.90                  | 2                        |

| Sample ID | Copy Number           |                          |                       |                          |                       |                          |                       |                          |
|-----------|-----------------------|--------------------------|-----------------------|--------------------------|-----------------------|--------------------------|-----------------------|--------------------------|
|           | r = 1                 |                          | r = 2                 |                          | r = 3                 |                          | Average               |                          |
|           | Ratio<br>(target/ref) | Estimated<br>Copy Number |
| 14030876  | 1.10                  | 1                        | 1.13                  | 1                        | 0.98                  | 1                        | 1.07                  | 1                        |
| 14030877  | 1.12                  | 1                        | 1.11                  | 1                        | 1.10                  | 1                        | 1.11                  | 1                        |
| 14030878  | 1.17                  | 1                        | 1.22                  | 1                        | 1.34                  | 1                        | 1.24                  | 1                        |
| 14030879  | 1.14                  | 1                        | 1.14                  | 1                        | 1.12                  | 1                        | 1.13                  | 1                        |
| 14030880  | 1.11                  | 1                        | 1.21                  | 1                        | 1.08                  | 1                        | 1.14                  | 1                        |
| 14030881  | 5.67                  | 6                        | 5.95                  | 6                        | 5.79                  | 6                        | 5.80                  | 6                        |
| 14030882  | 1.23                  | 1                        | 1.16                  | 1                        | 1.07                  | 1                        | 1.15                  | 1                        |
| 14030883  | 3.40                  | 3                        | 2.81                  | 3                        | 2.98                  | 3                        | 3.06                  | 3                        |
| 14030884  | 1.15                  | 1                        | 1.19                  | 1                        | 1.13                  | 1                        | 1.15                  | 1                        |
| 14030885  | 0.99                  | 1                        | 1.15                  | 1                        | 1.14                  | 1                        | 1.09                  | 1                        |
| 14030886  | 3.54                  | 4                        | 2.79                  | 3                        | 2.72                  | 3                        | 3.02                  | 3                        |
| 14030887  | 2.92                  | 3                        | 2.89                  | 3                        | 3.37                  | 3                        | 3.06                  | 3                        |
| 14030888  | 1.32                  | 1                        | 1.34                  | 1                        | 1.14                  | 1                        | 1.27                  | 1                        |
| 14030889  | 3.17                  | 3                        | 3.15                  | 3                        | 3.13                  | 3                        | 3.15                  | 3                        |
| 14030890  | 2.11                  | 2                        | 2.20                  | 2                        | 2.31                  | 2                        | 2.21                  | 2                        |
| 14030891  | 3.53                  | 4                        | 3.44                  | 3                        | 3.64                  | 4                        | 3.54                  | 4                        |
| 14030892  | 1.27                  | 1                        | 1.18                  | 1                        | 1.11                  | 1                        | 1.18                  | 1                        |
| 14030893  | 1.01                  | 1                        | 0.99                  | 1                        | 1.00                  | 1                        | 1.00                  | 1                        |
| 14030894  | 1.73                  | 2                        | 1.59                  | 2                        | 1.91                  | 2                        | 1.74                  | 2                        |

| Sample ID | Copy Number           |                          |                       |                          |                       |                          |                       |                          |
|-----------|-----------------------|--------------------------|-----------------------|--------------------------|-----------------------|--------------------------|-----------------------|--------------------------|
|           | r = 1                 |                          | r = 2                 |                          | r = 3                 |                          | Average               |                          |
|           | Ratio<br>(target/ref) | Estimated<br>Copy Number |
| 14030895  | 3.71                  | 4                        | 3.49                  | 3                        | 3.33                  | 3                        | 3.51                  | 4                        |
| 14030896  | 1.56                  | 2                        | 1.64                  | 2                        | 1.54                  | 2                        | 1.58                  | 2                        |
| 14030897  | 1.20                  | 1                        | 1.06                  | 1                        | 0.98                  | 1                        | 1.08                  | 1                        |
| 14030898  | 2.03                  | 2                        | 2.18                  | 2                        | 1.99                  | 2                        | 2.07                  | 2                        |
| 14030899  | 1.02                  | 1                        | 1.03                  | 1                        | 1.16                  | 1                        | 1.07                  | 1                        |
| 14030900  | 1.81                  | 2                        | 1.91                  | 2                        | 1.91                  | 2                        | 1.88                  | 2                        |
| 14030901  | 0.99                  | 1                        | 1.11                  | 1                        | 1.10                  | 1                        | 1.07                  | 1                        |
| 14030902  | 4.02                  | 4                        | 3.66                  | 4                        | 3.91                  | 4                        | 3.87                  | 4                        |
| 14030903  | 3.04                  | 3                        | 2.92                  | 3                        | 3.01                  | 3                        | 2.99                  | 3                        |
| 14030904  | 2.00                  | 2                        | 2.03                  | 2                        | 2.50                  | 2                        | 2.18                  | 2                        |
| 14030905  | 1.14                  | 1                        | 1.04                  | 1                        | 1.04                  | 1                        | 1.07                  | 1                        |
| 14030906  | 1.06                  | 1                        | 1.07                  | 1                        | 1.08                  | 1                        | 1.07                  | 1                        |
| 14030907  | 0.95                  | 1                        | 1.02                  | 1                        | 0.82                  | 1                        | 0.93                  | 1                        |
| 14030908  | 1.02                  | 1                        | 1.04                  | 1                        | 0.97                  | 1                        | 1.01                  | 1                        |
| 14030909  | 1.04                  | 1                        | 0.97                  | 1                        | 1.07                  | 1                        | 1.03                  | 1                        |
| 14030910  | 0.99                  | 1                        | 0.97                  | 1                        | 1.04                  | 1                        | 1.00                  | 1                        |
| 14030911  | 2.77                  | 3                        | 2.68                  | 3                        | 2.59                  | 3                        | 2.68                  | 3                        |
| 14030912  | 0.93                  | 1                        | 1.02                  | 1                        | 0.96                  | 1                        | 0.97                  | 1                        |
| 14030913  | 1.05                  | 1                        | 1.13                  | 1                        | 1.12                  | 1                        | 1.10                  | 1                        |

| Sample ID | Copy Number           |                          |                       |                          |                       |                          |                       |                          |
|-----------|-----------------------|--------------------------|-----------------------|--------------------------|-----------------------|--------------------------|-----------------------|--------------------------|
|           | r = 1                 |                          | r = 2                 |                          | r = 3                 |                          | Average               |                          |
|           | Ratio<br>(target/ref) | Estimated<br>Copy Number |
| 14030914  | 3.16                  | 3                        | 3.21                  | 3                        | 3.57                  | 4                        | 3.31                  | 3                        |
| 14030915  | 4.47                  | 4                        | 4.06                  | 4                        | 3.90                  | 4                        | 4.14                  | 4                        |
| 14030916  | 2.18                  | 2                        | 2.03                  | 2                        | 2.12                  | 2                        | 2.11                  | 2                        |
| 14030917  | 1.08                  | 1                        | 1.11                  | 1                        | 1.05                  | 1                        | 1.08                  | 1                        |
| 14030918  | 3.04                  | 3                        | 3.15                  | 3                        | 3.45                  | 3                        | 3.21                  | 3                        |
| 14030919  | 2.94                  | 3                        | 2.98                  | 3                        | 2.65                  | 3                        | 2.86                  | 3                        |
| 14030920  | 11.40                 | 11                       | 11.89                 | 12                       | 11.42                 | 11                       | 11.57                 | 12                       |
| 14030921  | 66.41                 | 66                       | 67.77                 | 68                       | 70.07                 | 70                       | 68.08                 | 68                       |
| 14030922  | 7.33                  | 7                        | 6.89                  | 7                        | 6.26                  | 6                        | 6.83                  | 7                        |
| 14030923  | 2.86                  | 3                        | 2.81                  | 3                        | 2.68                  | 3                        | 2.78                  | 3                        |
| 14030924  | 3.72                  | 4                        | 3.72                  | 4                        | 3.23                  | 3                        | 3.56                  | 4                        |
| 14030925  | 3.00                  | 3                        | 3.33                  | 3                        | 2.97                  | 3                        | 3.10                  | 3                        |
| 14030926  | 3.18                  | 3                        | 3.18                  | 3                        | 3.04                  | 3                        | 3.13                  | 3                        |
| 14030927  | 2.64                  | 3                        | 2.94                  | 3                        | 2.80                  | 3                        | 2.80                  | 3                        |
| 14030928  | 61.18                 | 61                       | 2.90                  | 3                        | 2.60                  | 3                        | 22.23                 | 22                       |
| 14030929  | 7.72                  | 8                        | 7.53                  | 8                        | 7.56                  | 8                        | 7.60                  | 8                        |
| 14030930  | 12.98                 | 13                       | 12.79                 | 13                       | 12.73                 | 13                       | 12.83                 | 13                       |
| 14030931  | 5.05                  | 5                        | 4.81                  | 5                        | 5.06                  | 5                        | 4.97                  | 5                        |
| 14030932  | 1.44                  | 1                        | 1.20                  | 1                        | 1.18                  | 1                        | 1.27                  | 1                        |

| Sample ID | Copy Number           |                          |                       |                          |                       |                          |                       |                          |
|-----------|-----------------------|--------------------------|-----------------------|--------------------------|-----------------------|--------------------------|-----------------------|--------------------------|
|           | r = 1                 |                          | r = 2                 |                          | r = 3                 |                          | Average               |                          |
|           | Ratio<br>(target/ref) | Estimated<br>Copy Number |
| 14030933  | 2.16                  | 2                        | 1.75                  | 2                        | 1.88                  | 2                        | 1.93                  | 2                        |
| 14030934  | 4.90                  | 5                        | 4.83                  | 5                        | 4.76                  | 5                        | 4.83                  | 5                        |
| 14030935  | 5.16                  | 5                        | 5.08                  | 5                        | 4.92                  | 5                        | 5.05                  | 5                        |
| 14030936  | 2.14                  | 2                        | 2.00                  | 2                        | 1.91                  | 2                        | 2.02                  | 2                        |
| 14030937  | 6.26                  | 6                        | 5.67                  | 6                        | 5.47                  | 5                        | 5.80                  | 6                        |
| 14030938  | 1.94                  | 2                        | 1.99                  | 2                        | 1.90                  | 2                        | 1.94                  | 2                        |
| 14030939  | 2.53                  | 3                        | 2.84                  | 3                        | 2.83                  | 3                        | 2.73                  | 3                        |
| 14030940  | 1.96                  | 2                        | 2.00                  | 2                        | 1.88                  | 2                        | 1.95                  | 2                        |
| 14030941  | 0.65                  | 1                        | 0.66                  | 1                        | 0.68                  | 1                        | 0.66                  | 1                        |
| 14030942  | 1.14                  | 1                        | 1.13                  | 1                        | 1.09                  | 1                        | 1.12                  | 1                        |
| 14030943  | 1.14                  | 1                        | 1.15                  | 1                        | 1.16                  | 1                        | 1.15                  | 1                        |
| 14030944  | 0.86                  | 1                        | 1.16                  | 1                        | 1.22                  | 1                        | 1.08                  | 1                        |
| 14030945  | 1.03                  | 1                        | 0.89                  | 1                        | 1.86                  | 2                        | 1.26                  | 1                        |
| 14030946  | 3.52                  | 4                        | 2.96                  | 3                        | 4.25                  | 4                        | 3.58                  | 4                        |
| 14030947  | 1.77                  | 2                        | 1.95                  | 2                        | 2.52                  | 3                        | 2.08                  | 2                        |
| 14030948  | 2.09                  | 2                        | 1.99                  | 2                        | 2.03                  | 2                        | 2.04                  | 2                        |
| 14030949  | 2.02                  | 2                        | 2.23                  | 2                        | 1.84                  | 2                        | 2.03                  | 2                        |
| 14030950  | 2.51                  | 3                        | 2.56                  | 3                        | 2.79                  | 3                        | 2.62                  | 3                        |
| 14030951  | 2.09                  | 2                        | 2.04                  | 2                        | 2.21                  | 2                        | 2.12                  | 2                        |

| Sample ID | Copy Number           |                          |                       |                          |                       |                          |                       |                          |
|-----------|-----------------------|--------------------------|-----------------------|--------------------------|-----------------------|--------------------------|-----------------------|--------------------------|
|           | r = 1                 |                          | r = 2                 |                          | r = 3                 |                          | Average               |                          |
|           | Ratio<br>(target/ref) | Estimated<br>Copy Number |
| 14030952  | 2.86                  | 3                        | 2.67                  | 3                        | 3.38                  | 3                        | 2.97                  | 3                        |
| 14030953  | 3.81                  | 4                        | 3.01                  | 3                        | 4.76                  | 5                        | 3.86                  | 4                        |
| 14030954  | 3.04                  | 3                        | 2.95                  | 3                        | 2.94                  | 3                        | 2.98                  | 3                        |
| 14030955  | 2.53                  | 3                        | 2.50                  | 3                        | 2.59                  | 3                        | 2.54                  | 3                        |
| 14030956  | 1.88                  | 2                        | 2.04                  | 2                        | 2.07                  | 2                        | 2.00                  | 2                        |
| 14030957  | 1.22                  | 1                        | 1.65                  | 2                        | 2.02                  | 2                        | 1.63                  | 2                        |
| 14030958  | 1.52                  | 2                        | 1.47                  | 1                        | 1.43                  | 1                        | 1.47                  | 1                        |
| 14030959  | 1.21                  | 1                        | 1.08                  | 1                        | 1.14                  | 1                        | 1.14                  | 1                        |
| 14030960  | 1.12                  | 1                        | 1.07                  | 1                        | 1.13                  | 1                        | 1.11                  | 1                        |
| 14030961  | 1.19                  | 1                        | 1.25                  | 1                        | 1.22                  | 1                        | 1.22                  | 1                        |
| 14030962  | 0.97                  | 1                        | 0.94                  | 1                        | 1.05                  | 1                        | 0.99                  | 1                        |
| 14030963  | 1.92                  | 2                        | 2.12                  | 2                        | 2.05                  | 2                        | 2.03                  | 2                        |
| 14030964  | 2.19                  | 2                        | 2.08                  | 2                        | 2.09                  | 2                        | 2.12                  | 2                        |
| 14030965  | 2.10                  | 2                        | 2.15                  | 2                        | 2.06                  | 2                        | 2.10                  | 2                        |
| 14030966  | 2.08                  | 2                        | 3.27                  | 3                        | 2.45                  | 2                        | 2.60                  | 3                        |
| 14030967  | 1.26                  | 1                        | 1.31                  | 1                        | 1.39                  | 1                        | 1.32                  | 1                        |
| 14030968  | 1.15                  | 1                        | 1.07                  | 1                        | 1.17                  | 1                        | 1.13                  | 1                        |
| 14030969  | 6.62                  | 7                        | 6.53                  | 7                        | 7.39                  | 7                        | 6.85                  | 7                        |
| 14030970  | 1.10                  | 1                        | 1.94                  | 2                        | 1.36                  | 1                        | 1.47                  | 1                        |

| Sample ID | Copy Number           |                          |                       |                          |                       |                          |                       |                          |
|-----------|-----------------------|--------------------------|-----------------------|--------------------------|-----------------------|--------------------------|-----------------------|--------------------------|
|           | r = 1                 |                          | r = 2                 |                          | r = 3                 |                          | Average               |                          |
|           | Ratio<br>(target/ref) | Estimated<br>Copy Number |
| 14030971  | 14.65                 | 15                       | 13.85                 | 14                       | 13.58                 | 14                       | 14.03                 | 14                       |
| 14030972  | 2.01                  | 2                        | 2.04                  | 2                        | 2.14                  | 2                        | 2.06                  | 2                        |
| 14030973  | 1.21                  | 1                        | 1.02                  | 1                        | 0.94                  | 1                        | 1.06                  | 1                        |
| 14030974  | 1.02                  | 1                        | 1.15                  | 1                        | 1.07                  | 1                        | 1.08                  | 1                        |
| 14030975  | 6.43                  | 6                        | 6.87                  | 7                        | 8.19                  | 8                        | 7.17                  | 7                        |
| 14030976  | 5.79                  | 6                        | 6.41                  | 6                        | 5.20                  | 5                        | 5.80                  | 6                        |
| 14030977  | 3.36                  | 3                        | 3.25                  | 3                        | 3.39                  | 3                        | 3.34                  | 3                        |
| 14030978  | 1.15                  | 1                        | 1.16                  | 1                        | 1.23                  | 1                        | 1.18                  | 1                        |
| 14030979  | 9.82                  | 10                       | 11.36                 | 11                       | 10.98                 | 11                       | 10.72                 | 11                       |
| 14030980  | 1.33                  | 1                        | 1.39                  | 1                        | 1.27                  | 1                        | 1.33                  | 1                        |
| 14030981  | 1.74                  | 2                        | 1.41                  | 1                        | 1.33                  | 1                        | 1.49                  | 1                        |
| 14030982  | 1.29                  | 1                        | 1.32                  | 1                        | 1.19                  | 1                        | 1.27                  | 1                        |
| 14030983  | 1.15                  | 1                        | 1.15                  | 1                        | 1.21                  | 1                        | 1.17                  | 1                        |
| 14030984  | 1.36                  | 1                        | 1.33                  | 1                        | 1.37                  | 1                        | 1.35                  | 1                        |
| 14030985  | 2.72                  | 3                        | 2.57                  | 3                        | 2.78                  | 3                        | 2.69                  | 3                        |
| 14030986  | 1.21                  | 1                        | 1.10                  | 1                        | 1.07                  | 1                        | 1.12                  | 1                        |
| 14030987  | 2.48                  | 2                        | 2.17                  | 2                        | 2.17                  | 2                        | 2.27                  | 2                        |
| 14030988  | 1.32                  | 1                        | 1.19                  | 1                        | 1.04                  | 1                        | 1.18                  | 1                        |
| 14030989  | 4.50                  | 5                        | 4.37                  | 4                        | 4.22                  | 4                        | 4.37                  | 4                        |



| Sample ID | Copy Number           |                          |                       |                          |                       |                          |                       |                          |
|-----------|-----------------------|--------------------------|-----------------------|--------------------------|-----------------------|--------------------------|-----------------------|--------------------------|
|           | r = 1                 |                          | r = 2                 |                          | r = 3                 |                          | Average               |                          |
|           | Ratio<br>(target/ref) | Estimated<br>Copy Number |
| 14030990  | 4.92                  | 5                        | 4.41                  | 4                        | 3.79                  | 4                        | 4.37                  | 4                        |
| 14030991  | 1.01                  | 1                        | 1.00                  | 1                        | 1.05                  | 1                        | 1.02                  | 1                        |
| 14030992  | 2.01                  | 2                        | 1.99                  | 2                        | 2.04                  | 2                        | 2.01                  | 2                        |
| 14030993  | 0.59                  | 1                        | 0.70                  | 1                        | 0.59                  | 1                        | 0.63                  | 1                        |
| 14030994  | 23.04                 | 23                       | 22.01                 | 22                       | 22.29                 | 22                       | 22.45                 | 22                       |
| 14030995  | 1.20                  | 1                        | 1.05                  | 1                        | 1.27                  | 1                        | 1.17                  | 1                        |
| 14030996  | 1.19                  | 1                        | 1.21                  | 1                        | 1.17                  | 1                        | 1.19                  | 1                        |
| 14030997  | 1.78                  | 2                        | 1.82                  | 2                        | 1.66                  | 2                        | 1.75                  | 2                        |
| 14030998  | 1.02                  | 1                        | 0.90                  | 1                        | 1.00                  | 1                        | 0.97                  | 1                        |
| 14030999  | 2.92                  | 3                        | 2.61                  | 3                        | 2.84                  | 3                        | 2.79                  | 3                        |
| 14031000  | 0.99                  | 1                        | 0.92                  | 1                        | 1.00                  | 1                        | 0.97                  | 1                        |
| 14031001  | 1.00                  | 1                        | 1.06                  | 1                        | 0.99                  | 1                        | 1.02                  | 1                        |
| 14031002  | 1.12                  | 1                        | 1.13                  | 1                        | 1.07                  | 1                        | 1.11                  | 1                        |
| 14031003  | 1.10                  | 1                        | 1.07                  | 1                        | 1.11                  | 1                        | 1.09                  | 1                        |
| 14031004  | 4.52                  | 5                        | 3.97                  | 4                        | 4.22                  | 4                        | 4.23                  | 4                        |
| 14031005  | 1.18                  | 1                        | 1.20                  | 1                        | 0.93                  | 1                        | 1.11                  | 1                        |
| 14031006  | 1.29                  | 1                        | 1.24                  | 1                        | 1.25                  | 1                        | 1.26                  | 1                        |
| 14031007  | 4.51                  | 5                        | 4.85                  | 5                        | 4.58                  | 5                        | 4.65                  | 5                        |
| 14031008  | 1.97                  | 2                        | 1.86                  | 2                        | 1.79                  | 2                        | 1.87                  | 2                        |

| Sample ID | Copy Number           |                          |                       |                          |                       |                          |                       |                          |
|-----------|-----------------------|--------------------------|-----------------------|--------------------------|-----------------------|--------------------------|-----------------------|--------------------------|
|           | r = 1                 |                          | r = 2                 |                          | r = 3                 |                          | Average               |                          |
|           | Ratio<br>(target/ref) | Estimated<br>Copy Number |
| 14031009  | 1.05                  | 1                        | 1.20                  | 1                        | 1.02                  | 1                        | 1.09                  | 1                        |
| 14031010  | 1.69                  | 2                        | 1.69                  | 2                        | 2.06                  | 2                        | 1.81                  | 2                        |
| 14031011  | 2.19                  | 2                        | 2.16                  | 2                        | 2.06                  | 2                        | 2.13                  | 2                        |
| 14031012  | 5.32                  | 5                        | 5.25                  | 5                        | 4.66                  | 5                        | 5.08                  | 5                        |
| 14031013  | 1.18                  | 1                        | 1.25                  | 1                        | 1.18                  | 1                        | 1.21                  | 1                        |
| 14031014  | 2.37                  | 2                        | 2.37                  | 2                        | 2.30                  | 2                        | 2.35                  | 2                        |
| 14031015  | 1.53                  | 2                        | 1.92                  | 2                        | 1.83                  | 2                        | 1.76                  | 2                        |
| 14031016  | 1.14                  | 1                        | 1.10                  | 1                        | 1.03                  | 1                        | 1.09                  | 1                        |
| 14031017  | 1.04                  | 1                        | 1.15                  | 1                        | 1.04                  | 1                        | 1.08                  | 1                        |
| 14031018  | 2.29                  | 2                        | 2.27                  | 2                        | 2.26                  | 2                        | 2.27                  | 2                        |
| 14031019  | 17.24                 | 17                       | 16.70                 | 17                       | 16.17                 | 16                       | 16.70                 | 17                       |
| 14031020  | 2.33                  | 2                        | 2.39                  | 2                        | 2.25                  | 2                        | 2.32                  | 2                        |
| 14031021  | 5.26                  | 5                        | 5.09                  | 5                        | 5.14                  | 5                        | 5.16                  | 5                        |
| 14031022  | 8.84                  | 9                        | 8.02                  | 8                        | 7.96                  | 8                        | 8.27                  | 8                        |
| 14031023  | 3.26                  | 3                        | 3.36                  | 3                        | 3.23                  | 3                        | 3.28                  | 3                        |
| 14031024  | 2.09                  | 2                        | 1.97                  | 2                        | 2.00                  | 2                        | 2.02                  | 2                        |
| 14031025  | 6.07                  | 6                        | 6.07                  | 6                        | 5.10                  | 5                        | 5.75                  | 6                        |
| 14031026  | 1.85                  | 2                        | 2.07                  | 2                        | 2.32                  | 2                        | 2.08                  | 2                        |
| 14031027  | 2.14                  | 2                        | 2.03                  | 2                        | 2.16                  | 2                        | 2.11                  | 2                        |

| Sample ID | Copy Number           |                          |                       |                          |                       |                          |                       |                          |
|-----------|-----------------------|--------------------------|-----------------------|--------------------------|-----------------------|--------------------------|-----------------------|--------------------------|
|           | r = 1                 |                          | r = 2                 |                          | r = 3                 |                          | Average               |                          |
|           | Ratio<br>(target/ref) | Estimated<br>Copy Number |
| 14031028  | 1.22                  | 1                        | 1.29                  | 1                        | 1.17                  | 1                        | 1.23                  | 1                        |
| 14031029  | 1.12                  | 1                        | 1.01                  | 1                        | 1.02                  | 1                        | 1.05                  | 1                        |
| 14031030  | 2.15                  | 2                        | 1.98                  | 2                        | 2.03                  | 2                        | 2.06                  | 2                        |
| 14031031  | 1.13                  | 1                        | 1.03                  | 1                        | 1.29                  | 1                        | 1.15                  | 1                        |
| 14031032  | 10.55                 | 11                       | 10.11                 | 10                       | 8.85                  | 9                        | 9.83                  | 10                       |
| 14031033  | 2.94                  | 3                        | 2.63                  | 3                        | 2.70                  | 3                        | 2.76                  | 3                        |
| 14031034  | 2.97                  | 3                        | 2.99                  | 3                        | 2.68                  | 3                        | 2.88                  | 3                        |
| 14031035  | 0.90                  | 1                        | 0.89                  | 1                        | 0.88                  | 1                        | 0.89                  | 1                        |
| 14031036  | 4.68                  | 5                        | 4.18                  | 4                        | 4.55                  | 5                        | 4.47                  | 4                        |
| 14031037  | 3.65                  | 4                        | 6.60                  | 7                        | 3.57                  | 4                        | 4.61                  | 5                        |
| 14031038  | 2.88                  | 3                        | 3.17                  | 3                        | 3.67                  | 4                        | 3.24                  | 3                        |
| 14031039  | 3.46                  | 3                        | 3.42                  | 3                        | 2.83                  | 3                        | 3.24                  | 3                        |
| 14031040  | 1.11                  | 1                        | 1.03                  | 1                        | 1.02                  | 1                        | 1.06                  | 1                        |
| 14031041  | 3.07                  | 3                        | 2.69                  | 3                        | 2.79                  | 3                        | 2.85                  | 3                        |
| 14031042  | 1.19                  | 1                        | 1.17                  | 1                        | 1.13                  | 1                        | 1.17                  | 1                        |
| 14031043  | 0.65                  | 1                        | 0.69                  | 1                        | 0.59                  | 1                        | 0.64                  | 1                        |
| 14031044  | 2.07                  | 2                        | 2.04                  | 2                        | 1.99                  | 2                        | 2.03                  | 2                        |
| 14031045  | 9.18                  | 9                        | 9.17                  | 9                        | 9.84                  | 10                       | 9.40                  | 9                        |
| 14031046  | 0.82                  | 1                        | 0.92                  | 1                        | 1.18                  | 1                        | 0.98                  | 1                        |

| Sample ID | Copy Number           |                          |                       |                          |                       |                          |                       |                          |
|-----------|-----------------------|--------------------------|-----------------------|--------------------------|-----------------------|--------------------------|-----------------------|--------------------------|
|           | r = 1                 |                          | r = 2                 |                          | r = 3                 |                          | Average               |                          |
|           | Ratio<br>(target/ref) | Estimated<br>Copy Number |
| 14031047  | 1.00                  | 1                        | 1.17                  | 1                        | 1.13                  | 1                        | 1.10                  | 1                        |
| 14031048  | 1.05                  | 1                        | 0.95                  | 1                        | 0.98                  | 1                        | 0.99                  | 1                        |
| 14031049  | 0.26                  | 0                        | 0.22                  | 0                        | 0.27                  | 0                        | 0.25                  | 0                        |
| 14031050  | 2.62                  | 3                        | 2.66                  | 3                        | 2.42                  | 2                        | 2.57                  | 3                        |
| 14031051  | 2.18                  | 2                        | 2.00                  | 2                        | 2.11                  | 2                        | 2.10                  | 2                        |
| 14031052  | 1.27                  | 1                        | 1.20                  | 1                        | 1.11                  | 1                        | 1.19                  | 1                        |
| 14031053  | 3.20                  | 3                        | 3.07                  | 3                        | 3.04                  | 3                        | 3.10                  | 3                        |
| 14031054  | 3.35                  | 3                        | 3.20                  | 3                        | 3.43                  | 3                        | 3.33                  | 3                        |
| 14031055  | 5.40                  | 5                        | 5.82                  | 6                        | 6.35                  | 6                        | 5.86                  | 6                        |
| 14031056  | 2.77                  | 3                        | 2.87                  | 3                        | 2.75                  | 3                        | 2.80                  | 3                        |
| 14031057  | 2.79                  | 3                        | 2.74                  | 3                        | 2.50                  | 3                        | 2.68                  | 3                        |
| 14031058  | 3.09                  | 3                        | 2.90                  | 3                        | 2.90                  | 3                        | 2.96                  | 3                        |
| 14031059  | 1.67                  | 2                        | 1.74                  | 2                        | 1.68                  | 2                        | 1.70                  | 2                        |
| 14031060  | 1.80                  | 2                        | 1.72                  | 2                        | 1.73                  | 2                        | 1.75                  | 2                        |
| 14031061  | 0.81                  | 1                        | 0.85                  | 1                        | 0.81                  | 1                        | 0.83                  | 1                        |
| 14031062  | 3.25                  | 3                        | 3.57                  | 4                        | 3.45                  | 3                        | 3.42                  | 3                        |
| 14031063  | 1.20                  | 1                        | 1.06                  | 1                        | 0.96                  | 1                        | 1.07                  | 1                        |
| 14031064  | 1.17                  | 1                        | 1.09                  | 1                        | 0.87                  | 1                        | 1.04                  | 1                        |
| 14031065  | 1.07                  | 1                        | 1.07                  | 1                        | 1.15                  | 1                        | 1.09                  | 1                        |

| Sample ID | Copy Number           |                          |                       |                          |                       |                          |                       |                          |
|-----------|-----------------------|--------------------------|-----------------------|--------------------------|-----------------------|--------------------------|-----------------------|--------------------------|
|           | r = 1                 |                          | r = 2                 |                          | r = 3                 |                          | Average               |                          |
|           | Ratio<br>(target/ref) | Estimated<br>Copy Number |
| 14031066  | 2.35                  | 2                        | 2.03                  | 2                        | 2.32                  | 2                        | 2.23                  | 2                        |
| 14031067  | 2.87                  | 3                        | 3.18                  | 3                        | 3.16                  | 3                        | 3.07                  | 3                        |
| 14031068  | 1.45                  | 1                        | 1.44                  | 1                        | 1.36                  | 1                        | 1.42                  | 1                        |
| 14031069  | 1.18                  | 1                        | 1.26                  | 1                        | 0.93                  | 1                        | 1.12                  | 1                        |
| 14031070  | 3.85                  | 4                        | 3.65                  | 4                        | 2.38                  | 2                        | 3.29                  | 3                        |
| 14031071  | 5.55                  | 6                        | 4.83                  | 5                        | 5.15                  | 5                        | 5.18                  | 5                        |
| 14031072  | 2.23                  | 2                        | 2.36                  | 2                        | 2.38                  | 2                        | 2.32                  | 2                        |
| 14031073  | 4.85                  | 5                        | 5.41                  | 5                        | 6.16                  | 6                        | 5.47                  | 5                        |
| 14031074  | 2.43                  | 2                        | 2.33                  | 2                        | 2.16                  | 2                        | 2.30                  | 2                        |
| 14031075  | 5.33                  | 5                        | 5.46                  | 5                        | 5.52                  | 6                        | 5.44                  | 5                        |
| 14031076  | 3.34                  | 3                        | 3.78                  | 4                        | 3.83                  | 4                        | 3.65                  | 4                        |
| 14031077  | 1.20                  | 1                        | 1.22                  | 1                        | 1.21                  | 1                        | 1.21                  | 1                        |
| 14031078  | 1.25                  | 1                        | 1.26                  | 1                        | 1.11                  | 1                        | 1.21                  | 1                        |
| 14031079  | 1.20                  | 1                        | 1.28                  | 1                        | 1.13                  | 1                        | 1.20                  | 1                        |
| 14031080  | 1.11                  | 1                        | 1.04                  | 1                        | 1.04                  | 1                        | 1.06                  | 1                        |
| 14031081  | 1.03                  | 1                        | 0.94                  | 1                        | 1.06                  | 1                        | 1.01                  | 1                        |
| 14031082  | 3.08                  | 3                        | 3.14                  | 3                        | 2.97                  | 3                        | 3.06                  | 3                        |
| 14031083  | 1.27                  | 1                        | 1.16                  | 1                        | 1.23                  | 1                        | 1.22                  | 1                        |
| 14031084  | 1.13                  | 1                        | 1.09                  | 1                        | 1.14                  | 1                        | 1.12                  | 1                        |

| Sample ID | Copy Number           |                          |                       |                          |                       |                          |                       |                          |
|-----------|-----------------------|--------------------------|-----------------------|--------------------------|-----------------------|--------------------------|-----------------------|--------------------------|
|           | r = 1                 |                          | r = 2                 |                          | r = 3                 |                          | Average               |                          |
|           | Ratio<br>(target/ref) | Estimated<br>Copy Number |
| 14031085  | 2.19                  | 2                        | 2.43                  | 2                        | 2.34                  | 2                        | 2.32                  | 2                        |
| 14031086  | 1.41                  | 1                        | 1.39                  | 1                        | 1.55                  | 2                        | 1.45                  | 1                        |
| 14031087  | 3.03                  | 3                        | 3.14                  | 3                        | 3.28                  | 3                        | 3.15                  | 3                        |
| 14031088  | 2.04                  | 2                        | 2.05                  | 2                        | 2.11                  | 2                        | 2.07                  | 2                        |
| 14031089  | 1.25                  | 1                        | 1.26                  | 1                        | 1.21                  | 1                        | 1.24                  | 1                        |
| 14031090  | 1.22                  | 1                        | 1.15                  | 1                        | 1.17                  | 1                        | 1.18                  | 1                        |
| 14031091  | 1.06                  | 1                        | 1.07                  | 1                        | 1.02                  | 1                        | 1.05                  | 1                        |
| 14031092  | 1.15                  | 1                        | 1.00                  | 1                        | 1.14                  | 1                        | 1.10                  | 1                        |
| 14031093  | 1.25                  | 1                        | 1.21                  | 1                        | 1.25                  | 1                        | 1.24                  | 1                        |
| 14031094  | 1.97                  | 2                        | 2.20                  | 2                        | 1.93                  | 2                        | 2.03                  | 2                        |
| 14031095  | 1.35                  | 1                        | 1.48                  | 1                        | 1.30                  | 1                        | 1.37                  | 1                        |
| 14031096  | 3.62                  | 4                        | 3.61                  | 4                        | 3.69                  | 4                        | 3.64                  | 4                        |
| 14031097  | 3.55                  | 4                        | 3.52                  | 4                        | 4.20                  | 4                        | 3.76                  | 4                        |
| 14031098  | 1.18                  | 1                        | 1.05                  | 1                        | 1.14                  | 1                        | 1.12                  | 1                        |
| 14031099  | 2.10                  | 2                        | 2.23                  | 2                        | 2.29                  | 2                        | 2.20                  | 2                        |
| 14031100  | 3.09                  | 3                        | 3.04                  | 3                        | 3.25                  | 3                        | 3.13                  | 3                        |
| 14031101  | 3.15                  | 3                        | 2.90                  | 3                        | 2.66                  | 3                        | 2.90                  | 3                        |
| 14031102  | 4.04                  | 4                        | 4.04                  | 4                        | 3.67                  | 4                        | 3.92                  | 4                        |
| 14031103  | 1.22                  | 1                        | 1.17                  | 1                        | 1.18                  | 1                        | 1.19                  | 1                        |

| Sample ID | Copy Number           |                          |                       |                          |                       |                          |                       |                          |
|-----------|-----------------------|--------------------------|-----------------------|--------------------------|-----------------------|--------------------------|-----------------------|--------------------------|
|           | r = 1                 |                          | r = 2                 |                          | r = 3                 |                          | Average               |                          |
|           | Ratio<br>(target/ref) | Estimated<br>Copy Number |
| 14031104  | 1.23                  | 1                        | 1.26                  | 1                        | 1.17                  | 1                        | 1.22                  | 1                        |
| 14031105  | 3.30                  | 3                        | 3.12                  | 3                        | 3.50                  | 3                        | 3.30                  | 3                        |
| 14031106  | 3.96                  | 4                        | 3.67                  | 4                        | 3.67                  | 4                        | 3.76                  | 4                        |
| 14031107  | 2.10                  | 2                        | 1.83                  | 2                        | 2.13                  | 2                        | 2.02                  | 2                        |
| 14031108  | 1.20                  | 1                        | 1.41                  | 1                        | 1.19                  | 1                        | 1.26                  | 1                        |
| 14031109  | 5.96                  | 6                        | 6.01                  | 6                        | 5.46                  | 5                        | 5.81                  | 6                        |
| 14031110  | 1.40                  | 1                        | 1.49                  | 1                        | 1.67                  | 2                        | 1.52                  | 2                        |
| 14031111  | 3.18                  | 3                        | 3.23                  | 3                        | 3.31                  | 3                        | 3.24                  | 3                        |
| 14031112  | 8.60                  | 9                        | 8.87                  | 9                        | 8.43                  | 8                        | 8.63                  | 9                        |
| 14031113  | 1.26                  | 1                        | 1.30                  | 1                        | 1.25                  | 1                        | 1.27                  | 1                        |
| 14031114  | 1.25                  | 1                        | 1.32                  | 1                        | 1.19                  | 1                        | 1.25                  | 1                        |
| 14031115  | 4.55                  | 5                        | 4.01                  | 4                        | 4.26                  | 4                        | 4.27                  | 4                        |
| 14031116  | 2.84                  | 3                        | 2.82                  | 3                        | 2.94                  | 3                        | 2.87                  | 3                        |
| 14031117  | 2.38                  | 2                        | 2.30                  | 2                        | 2.36                  | 2                        | 2.35                  | 2                        |
| 14031118  | 1.16                  | 1                        | 1.15                  | 1                        | 1.08                  | 1                        | 1.13                  | 1                        |
| 14031119  | 1.28                  | 1                        | 1.58                  | 2                        | 1.31                  | 1                        | 1.39                  | 1                        |
| 14031120  | 1.18                  | 1                        | 0.90                  | 1                        | 1.00                  | 1                        | 1.03                  | 1                        |
| 14031121  | 1.33                  | 1                        | 1.25                  | 1                        | 1.36                  | 1                        | 1.31                  | 1                        |
| 14031122  | 2.37                  | 2                        | 2.21                  | 2                        | 2.37                  | 2                        | 2.32                  | 2                        |

| Sample ID | Copy Number           |                          |                       |                          |                       |                          |                       |                          |
|-----------|-----------------------|--------------------------|-----------------------|--------------------------|-----------------------|--------------------------|-----------------------|--------------------------|
|           | r = 1                 |                          | r = 2                 |                          | r = 3                 |                          | Average               |                          |
|           | Ratio<br>(target/ref) | Estimated<br>Copy Number |
| 14031123  | 2.37                  | 2                        | 2.03                  | 2                        | 2.34                  | 2                        | 2.25                  | 2                        |
| 14031124  | 3.58                  | 4                        | 3.01                  | 3                        | 3.17                  | 3                        | 3.25                  | 3                        |
| 14031125  | 2.72                  | 3                        | 2.40                  | 2                        | 2.46                  | 2                        | 2.53                  | 3                        |
| 14031126  | 2.00                  | 2                        | 3.06                  | 3                        | 2.63                  | 3                        | 2.56                  | 3                        |
| 14031127  | 2.56                  | 3                        | 2.55                  | 3                        | 2.24                  | 2                        | 2.45                  | 2                        |
| 14031128  | 1.45                  | 1                        | 1.71                  | 2                        | 1.52                  | 2                        | 1.56                  | 2                        |
| 14031129  | 1.46                  | 1                        | 1.39                  | 1                        | 1.38                  | 1                        | 1.41                  | 1                        |
| 14031130  | 1.31                  | 1                        | 1.04                  | 1                        | 1.09                  | 1                        | 1.15                  | 1                        |
| 14031131  | 9.14                  | 9                        | 8.42                  | 8                        | 9.19                  | 9                        | 8.92                  | 9                        |
| 14031132  | 2.19                  | 2                        | 2.21                  | 2                        | 2.08                  | 2                        | 2.16                  | 2                        |
| 14031133  | 4.49                  | 4                        | 6.62                  | 7                        | 4.37                  | 4                        | 5.16                  | 5                        |
| 14031134  | 4.87                  | 5                        | 4.84                  | 5                        | 4.70                  | 5                        | 4.80                  | 5                        |
| 14031135  | 4.93                  | 5                        | 5.13                  | 5                        | 4.61                  | 5                        | 4.89                  | 5                        |
| 14031136  | 3.40                  | 3                        | 3.00                  | 3                        | 3.19                  | 3                        | 3.20                  | 3                        |
| 14031137  | 5.86                  | 6                        | 5.28                  | 5                        | 5.57                  | 6                        | 5.57                  | 6                        |
| 14031138  | 1.39                  | 1                        | 1.23                  | 1                        | 1.14                  | 1                        | 1.25                  | 1                        |
| 14031139  | 8.78                  | 9                        | 8.91                  | 9                        | 8.27                  | 8                        | 8.65                  | 9                        |
| 14031140  | 1.49                  | 1                        | 1.28                  | 1                        | 1.24                  | 1                        | 1.33                  | 1                        |
| 14031141  | 4.80                  | 5                        | 5.16                  | 5                        | 4.44                  | 4                        | 4.80                  | 5                        |



| Sample ID | Copy Number           |                          |                       |                          |                       |                          |                       |                          |
|-----------|-----------------------|--------------------------|-----------------------|--------------------------|-----------------------|--------------------------|-----------------------|--------------------------|
|           | r = 1                 |                          | r = 2                 |                          | r = 3                 |                          | Average               |                          |
|           | Ratio<br>(target/ref) | Estimated<br>Copy Number |
| 14031142  | 1.40                  | 1                        | 1.45                  | 1                        | 1.49                  | 1                        | 1.44                  | 1                        |
| 14031143  | 5.02                  | 5                        | 4.37                  | 4                        | 4.62                  | 5                        | 4.67                  | 5                        |
| 14031144  | 5.92                  | 6                        | 6.10                  | 6                        | 6.19                  | 6                        | 6.07                  | 6                        |
| 14031145  | 2.61                  | 3                        | 2.64                  | 3                        | 2.44                  | 2                        | 2.56                  | 3                        |
| 14031146  | 2.20                  | 2                        | 2.16                  | 2                        | 2.25                  | 2                        | 2.20                  | 2                        |
| 14031147  | 1.28                  | 1                        | 1.29                  | 1                        | 1.37                  | 1                        | 1.31                  | 1                        |
| 14031148  | 1.26                  | 1                        | 1.49                  | 1                        | 1.40                  | 1                        | 1.38                  | 1                        |
| 14031149  | 4.45                  | 4                        | 4.92                  | 5                        | 4.75                  | 5                        | 4.71                  | 5                        |
| 14031150  | 1.83                  | 2                        | 2.17                  | 2                        | 2.29                  | 2                        | 2.10                  | 2                        |
| 14031151  | 1.18                  | 1                        | 1.42                  | 1                        | 1.49                  | 1                        | 1.36                  | 1                        |
| 14031152  | 1.40                  | 1                        | 1.48                  | 1                        | 1.51                  | 2                        | 1.46                  | 1                        |
| 14031153  | 4.30                  | 4                        | 4.86                  | 5                        | 4.96                  | 5                        | 4.71                  | 5                        |
| 14031154  | 4.02                  | 4                        | 3.69                  | 4                        | 4.14                  | 4                        | 3.95                  | 4                        |
| 14031155  | 2.31                  | 2                        | 2.54                  | 3                        | 2.44                  | 2                        | 2.43                  | 2                        |
| 14031156  | 3.09                  | 3                        | 3.33                  | 3                        | 3.43                  | 3                        | 3.28                  | 3                        |
| 14031157  | 2.35                  | 2                        | 2.62                  | 3                        | 2.89                  | 3                        | 2.62                  | 3                        |
| 14031158  | 3.41                  | 3                        | 3.76                  | 4                        | 4.07                  | 4                        | 3.75                  | 4                        |
| 14031159  | 1.66                  | 2                        | 1.59                  | 2                        | 1.41                  | 1                        | 1.55                  | 2                        |
| 14031160  | 5.77                  | 6                        | 5.32                  | 5                        | 5.29                  | 5                        | 5.46                  | 5                        |

| Sample ID | Copy Number           |                          |                       |                          |                       |                          |                       |                          |
|-----------|-----------------------|--------------------------|-----------------------|--------------------------|-----------------------|--------------------------|-----------------------|--------------------------|
|           | r = 1                 |                          | r = 2                 |                          | r = 3                 |                          | Average               |                          |
|           | Ratio<br>(target/ref) | Estimated<br>Copy Number |
| 14031161  | 1.48                  | 1                        | 1.53                  | 2                        | 1.46                  | 1                        | 1.49                  | 1                        |
| 14031162  | 1.34                  | 1                        | 1.22                  | 1                        | 1.25                  | 1                        | 1.27                  | 1                        |
| 14031163  | 3.37                  | 3                        | 3.59                  | 4                        | 3.17                  | 3                        | 3.38                  | 3                        |
| 14031164  | 2.29                  | 2                        | 2.57                  | 3                        | 2.16                  | 2                        | 2.34                  | 2                        |
| 14031165  | 1.57                  | 2                        | 1.63                  | 2                        | 1.37                  | 1                        | 1.52                  | 2                        |
| 14031166  | 4.61                  | 5                        | 4.27                  | 4                        | 4.15                  | 4                        | 4.34                  | 4                        |
| 14031167  | 2.79                  | 3                        | 2.68                  | 3                        | 3.38                  | 3                        | 2.95                  | 3                        |
| 14031168  | 2.46                  | 2                        | 2.20                  | 2                        | 2.09                  | 2                        | 2.25                  | 2                        |
| 14031169  | 9.61                  | 10                       | 8.86                  | 9                        | 8.70                  | 9                        | 9.06                  | 9                        |
| 14031170  | 4.31                  | 4                        | 4.17                  | 4                        | 3.40                  | 3                        | 3.96                  | 4                        |
| 14031171  | 3.47                  | 3                        | 3.12                  | 3                        | 3.13                  | 3                        | 3.24                  | 3                        |
| 14031172  | 1.25                  | 1                        | 1.21                  | 1                        | 1.15                  | 1                        | 1.20                  | 1                        |
| 14031173  | 2.60                  | 3                        | 2.43                  | 2                        | 2.32                  | 2                        | 2.45                  | 2                        |
| 14031174  | 2.40                  | 2                        | 2.20                  | 2                        | 1.84                  | 2                        | 2.15                  | 2                        |
| 14031175  | 5.42                  | 5                        | 5.09                  | 5                        | 4.70                  | 5                        | 5.07                  | 5                        |
| 14031176  | 4.15                  | 4                        | 3.84                  | 4                        | 3.57                  | 4                        | 3.86                  | 4                        |
| 14031177  | 3.58                  | 4                        | 3.70                  | 4                        | 3.61                  | 4                        | 3.63                  | 4                        |
| 14031178  | 2.31                  | 2                        | 2.50                  | 3                        | 2.39                  | 2                        | 2.40                  | 2                        |
| 14031179  | 1.62                  | 2                        | 1.42                  | 1                        | 1.34                  | 1                        | 1.46                  | 1                        |

| Sample ID | Copy Number           |                          |                       |                          |                       |                          |                       |                          |
|-----------|-----------------------|--------------------------|-----------------------|--------------------------|-----------------------|--------------------------|-----------------------|--------------------------|
|           | r = 1                 |                          | r = 2                 |                          | r = 3                 |                          | Average               |                          |
|           | Ratio<br>(target/ref) | Estimated<br>Copy Number |
| 14031180  | 1.21                  | 1                        | 1.22                  | 1                        | 1.56                  | 2                        | 1.33                  | 1                        |
| 14031181  | 1.47                  | 1                        | 1.37                  | 1                        | 1.40                  | 1                        | 1.42                  | 1                        |
| 14031182  | 5.61                  | 6                        | 5.75                  | 6                        | 6.37                  | 6                        | 5.91                  | 6                        |
| 14031183  | 3.29                  | 3                        | 2.74                  | 3                        | 3.11                  | 3                        | 3.05                  | 3                        |
| 14031184  | 2.48                  | 2                        | 2.98                  | 3                        | 2.86                  | 3                        | 2.77                  | 3                        |
| 14031185  | 1.29                  | 1                        | 1.39                  | 1                        | 1.31                  | 1                        | 1.33                  | 1                        |
| 14031186  | 1.16                  | 1                        | 1.14                  | 1                        | 1.13                  | 1                        | 1.14                  | 1                        |
| 14031187  | 2.21                  | 2                        | 2.13                  | 2                        | 2.28                  | 2                        | 2.21                  | 2                        |
| 14031188  | 9.78                  | 10                       | 9.14                  | 9                        | 10.90                 | 11                       | 9.94                  | 10                       |
| 14031189  | 1.25                  | 1                        | 1.28                  | 1                        | 1.16                  | 1                        | 1.23                  | 1                        |
| 14031190  | 1.15                  | 1                        | 1.26                  | 1                        | 1.23                  | 1                        | 1.21                  | 1                        |
| 14031191  | 1.13                  | 1                        | 1.08                  | 1                        | 1.09                  | 1                        | 1.10                  | 1                        |
| 14031192  | 4.14                  | 4                        | 3.99                  | 4                        | 3.89                  | 4                        | 4.00                  | 4                        |
| 14031193  | 4.08                  | 4                        | 4.36                  | 4                        | 4.21                  | 4                        | 4.21                  | 4                        |
| 14031194  | 1.68                  | 2                        | 1.58                  | 2                        | 1.47                  | 1                        | 1.58                  | 2                        |
| 14031195  | 6.08                  | 6                        | 5.85                  | 6                        | 5.73                  | 6                        | 5.89                  | 6                        |
| 14031196  | 3.27                  | 3                        | 3.44                  | 3                        | 3.24                  | 3                        | 3.32                  | 3                        |
| 14031197  | 3.48                  | 3                        | 3.27                  | 3                        | 3.10                  | 3                        | 3.28                  | 3                        |
| 14031198  | 1.16                  | 1                        | 1.11                  | 1                        | 1.14                  | 1                        | 1.13                  | 1                        |

| Sample ID | Copy Number           |                          |                       |                          |                       |                          |                       |                          |
|-----------|-----------------------|--------------------------|-----------------------|--------------------------|-----------------------|--------------------------|-----------------------|--------------------------|
|           | r = 1                 |                          | r = 2                 |                          | r = 3                 |                          | Average               |                          |
|           | Ratio<br>(target/ref) | Estimated<br>Copy Number |
| 14031199  | 1.25                  | 1                        | 1.16                  | 1                        | 1.26                  | 1                        | 1.22                  | 1                        |
| 14031200  | 3.84                  | 4                        | 3.91                  | 4                        | 4.01                  | 4                        | 3.92                  | 4                        |
| 14031201  | 22.11                 | 22                       | 21.55                 | 22                       | 23.33                 | 23                       | 22.33                 | 22                       |
| 14031202  | 3.30                  | 3                        | 2.98                  | 3                        | 3.37                  | 3                        | 3.22                  | 3                        |
| 14031203  | 2.25                  | 2                        | 2.19                  | 2                        | 2.21                  | 2                        | 2.22                  | 2                        |
| 14031204  | 2.54                  | 3                        | 3.00                  | 3                        | 3.04                  | 3                        | 2.86                  | 3                        |
| 14031205  | 6.53                  | 7                        | 6.49                  | 6                        | 6.21                  | 6                        | 6.41                  | 6                        |
| 14031206  | 1.55                  | 2                        | 1.66                  | 2                        | 2.29                  | 2                        | 1.84                  | 2                        |
| 14031207  | 1.52                  | 2                        | 1.54                  | 2                        | 1.67                  | 2                        | 1.58                  | 2                        |
| 14031208  | 1.22                  | 1                        | 1.25                  | 1                        | 1.14                  | 1                        | 1.20                  | 1                        |
| 14031209  | 1.12                  | 1                        | 1.11                  | 1                        | 1.15                  | 1                        | 1.13                  | 1                        |
| 14031210  | 1.31                  | 1                        | 1.28                  | 1                        | 1.51                  | 2                        | 1.37                  | 1                        |
| 14031211  | 1.15                  | 1                        | 1.22                  | 1                        | 1.20                  | 1                        | 1.19                  | 1                        |
| 14031212  | 1.13                  | 1                        | 1.17                  | 1                        | 1.10                  | 1                        | 1.13                  | 1                        |
| 14031213  | 1.14                  | 1                        | 1.21                  | 1                        | 1.42                  | 1                        | 1.26                  | 1                        |
| 14031214  | 1.24                  | 1                        | 1.36                  | 1                        | 1.39                  | 1                        | 1.33                  | 1                        |
| 14031215  | 2.03                  | 2                        | 2.07                  | 2                        | 1.97                  | 2                        | 2.02                  | 2                        |
| 14031216  | 2.20                  | 2                        | 2.14                  | 2                        | 2.43                  | 2                        | 2.26                  | 2                        |
| 14031217  | 2.27                  | 2                        | 2.20                  | 2                        | 2.10                  | 2                        | 2.19                  | 2                        |

| Sample ID | Copy Number           |                          |                       |                          |                       |                          |                       |                          |
|-----------|-----------------------|--------------------------|-----------------------|--------------------------|-----------------------|--------------------------|-----------------------|--------------------------|
|           | r = 1                 |                          | r = 2                 |                          | r = 3                 |                          | Average               |                          |
|           | Ratio<br>(target/ref) | Estimated<br>Copy Number |
| 14031218  | 2.20                  | 2                        | 2.31                  | 2                        | 2.18                  | 2                        | 2.23                  | 2                        |
| 14031219  | 1.24                  | 1                        | 1.46                  | 1                        | 1.47                  | 1                        | 1.39                  | 1                        |
| 14031220  | 3.18                  | 3                        | 3.05                  | 3                        | 3.29                  | 3                        | 3.18                  | 3                        |
| 14031221  | 0.90                  | 1                        | 0.91                  | 1                        | 0.97                  | 1                        | 0.93                  | 1                        |
| 14031222  | 6.33                  | 6                        | 6.46                  | 6                        | 5.40                  | 5                        | 6.06                  | 6                        |
| 14031223  | 1.43                  | 1                        | 1.26                  | 1                        | 1.39                  | 1                        | 1.36                  | 1                        |
| 14031224  | 1.65                  | 2                        | 1.56                  | 2                        | 1.51                  | 2                        | 1.57                  | 2                        |
| 14031225  | 2.78                  | 3                        | 2.81                  | 3                        | 2.94                  | 3                        | 2.84                  | 3                        |
| 14031226  | 2.52                  | 3                        | 2.68                  | 3                        | 2.85                  | 3                        | 2.68                  | 3                        |
| 14031227  | 3.92                  | 4                        | 3.60                  | 4                        | 3.55                  | 4                        | 3.69                  | 4                        |
| 14031228  | 2.92                  | 3                        | 3.23                  | 3                        | 3.57                  | 4                        | 3.24                  | 3                        |
| 14031229  | 1.07                  | 1                        | 0.98                  | 1                        | 1.14                  | 1                        | 1.06                  | 1                        |
| 14031230  | 1.21                  | 1                        | 1.12                  | 1                        | 1.18                  | 1                        | 1.17                  | 1                        |
| 14031231  | 1.08                  | 1                        | 1.10                  | 1                        | 1.05                  | 1                        | 1.08                  | 1                        |
| 14031232  | 1.29                  | 1                        | 1.35                  | 1                        | 1.24                  | 1                        | 1.29                  | 1                        |
| 14031233  | 1.55                  | 2                        | 1.52                  | 2                        | 1.39                  | 1                        | 1.49                  | 1                        |
| 14031234  | 2.27                  | 2                        | 2.20                  | 2                        | 2.03                  | 2                        | 2.16                  | 2                        |
| 14031235  | 3.70                  | 4                        | 3.36                  | 3                        | 3.85                  | 4                        | 3.64                  | 4                        |
| 14031236  | 1.37                  | 1                        | 1.45                  | 1                        | 1.54                  | 2                        | 1.45                  | 1                        |

| Sample ID | Copy Number           |                          |                       |                          |                       |                          |                       |                          |
|-----------|-----------------------|--------------------------|-----------------------|--------------------------|-----------------------|--------------------------|-----------------------|--------------------------|
|           | r = 1                 |                          | r = 2                 |                          | r = 3                 |                          | Average               |                          |
|           | Ratio<br>(target/ref) | Estimated<br>Copy Number |
| 14031237  | 3.39                  | 3                        | 3.26                  | 3                        | 3.70                  | 4                        | 3.45                  | 3                        |
| 14031238  | 2.68                  | 3                        | 2.51                  | 3                        | 2.70                  | 3                        | 2.63                  | 3                        |
| 14031239  | 3.97                  | 4                        | 3.94                  | 4                        | 3.51                  | 4                        | 3.81                  | 4                        |
| 14031240  | 2.38                  | 2                        | 2.41                  | 2                        | 2.31                  | 2                        | 2.37                  | 2                        |
| 14031241  | 1.25                  | 1                        | 1.30                  | 1                        | 1.21                  | 1                        | 1.25                  | 1                        |
| 14031242  | 2.53                  | 3                        | 2.46                  | 2                        | 2.50                  | 3                        | 2.50                  | 2                        |
| 14031243  | 3.53                  | 4                        | 2.94                  | 3                        | 3.20                  | 3                        | 3.23                  | 3                        |
| 14031244  | 5.54                  | 6                        | 5.31                  | 5                        | 5.18                  | 5                        | 5.34                  | 5                        |
| 14031245  | 1.90                  | 2                        | 1.81                  | 2                        | 1.72                  | 2                        | 1.81                  | 2                        |
| 14031246  | 2.44                  | 2                        | 2.30                  | 2                        | 2.38                  | 2                        | 2.37                  | 2                        |
| 14031247  | 2.50                  | 2                        | 2.41                  | 2                        | 2.32                  | 2                        | 2.41                  | 2                        |
| 14031248  | 2.91                  | 3                        | 3.16                  | 3                        | 3.15                  | 3                        | 3.07                  | 3                        |
| 14031249  | 2.50                  | 3                        | 2.59                  | 3                        | 2.70                  | 3                        | 2.60                  | 3                        |
| 14031250  | 3.13                  | 3                        | 3.07                  | 3                        | 2.25                  | 2                        | 2.82                  | 3                        |
| 14031251  | 2.83                  | 3                        | 2.88                  | 3                        | 2.81                  | 3                        | 2.84                  | 3                        |
| 14031252  | 1.13                  | 1                        | 0.80                  | 1                        | 1.08                  | 1                        | 1.01                  | 1                        |
| 14031253  | 1.28                  | 1                        | 1.22                  | 1                        | 1.27                  | 1                        | 1.26                  | 1                        |
| 14031254  | 1.24                  | 1                        | 1.18                  | 1                        | 1.21                  | 1                        | 1.21                  | 1                        |
| 14031255  | 1.02                  | 1                        | 0.90                  | 1                        | 0.95                  | 1                        | 0.96                  | 1                        |

| Sample ID | Copy Number           |                          |                       |                          |                       |                          |                       |                          |
|-----------|-----------------------|--------------------------|-----------------------|--------------------------|-----------------------|--------------------------|-----------------------|--------------------------|
|           | r = 1                 |                          | r = 2                 |                          | r = 3                 |                          | Average               |                          |
|           | Ratio<br>(target/ref) | Estimated<br>Copy Number |
| 14031256  | 3.65                  | 4                        | 3.03                  | 3                        | 3.07                  | 3                        | 3.25                  | 3                        |
| 14031257  | 1.97                  | 2                        | 1.71                  | 2                        | 1.96                  | 2                        | 1.88                  | 2                        |
| 14031258  | 1.90                  | 2                        | 1.64                  | 2                        | 1.84                  | 2                        | 1.80                  | 2                        |
| 14031259  | 1.97                  | 2                        | 2.08                  | 2                        | 1.91                  | 2                        | 1.99                  | 2                        |
| 14031260  | 1.12                  | 1                        | 0.96                  | 1                        | 1.17                  | 1                        | 1.08                  | 1                        |
| 14031261  | 1.10                  | 1                        | 1.08                  | 1                        | 1.20                  | 1                        | 1.13                  | 1                        |
| 14031262  | 4.78                  | 5                        | 4.64                  | 5                        | 4.25                  | 4                        | 4.56                  | 5                        |
| 14031263  | 7.82                  | 8                        | 7.67                  | 8                        | 7.17                  | 7                        | 7.55                  | 8                        |
| 14031264  | 9.00                  | 9                        | 7.23                  | 7                        | 8.34                  | 8                        | 8.19                  | 8                        |
| 14031265  | 9.33                  | 9                        | 9.12                  | 9                        | 9.52                  | 10                       | 9.32                  | 9                        |
| 14031266  | 2.04                  | 2                        | 2.15                  | 2                        | 1.95                  | 2                        | 2.05                  | 2                        |
| 14031267  | 1.14                  | 1                        | 1.16                  | 1                        | 1.13                  | 1                        | 1.14                  | 1                        |
| 14031268  | 2.27                  | 2                        | 1.88                  | 2                        | 2.37                  | 2                        | 2.17                  | 2                        |
| 14031269  | 1.04                  | 1                        | 0.95                  | 1                        | 0.88                  | 1                        | 0.96                  | 1                        |
| 14031270  | 1.53                  | 2                        | 1.35                  | 1                        | 1.10                  | 1                        | 1.33                  | 1                        |
| 14031271  | 1.07                  | 1                        | 1.04                  | 1                        | 0.90                  | 1                        | 1.00                  | 1                        |
| 14031272  | 1.11                  | 1                        | 1.01                  | 1                        | 1.00                  | 1                        | 1.04                  | 1                        |
| 14031273  | 0.83                  | 1                        | 0.94                  | 1                        | 0.96                  | 1                        | 0.91                  | 1                        |
| 14031274  | 2.29                  | 2                        | 2.16                  | 2                        | 2.23                  | 2                        | 2.23                  | 2                        |

| Sample ID | Copy Number           |                          |                       |                          |                       |                          |                       |                          |
|-----------|-----------------------|--------------------------|-----------------------|--------------------------|-----------------------|--------------------------|-----------------------|--------------------------|
|           | r = 1                 |                          | r = 2                 |                          | r = 3                 |                          | Average               |                          |
|           | Ratio<br>(target/ref) | Estimated<br>Copy Number |
| 14031275  | 1.89                  | 2                        | 2.03                  | 2                        | 2.21                  | 2                        | 2.04                  | 2                        |
| 14031276  | 2.74                  | 3                        | 3.26                  | 3                        | 2.48                  | 2                        | 2.82                  | 3                        |
| 14031277  | 2.85                  | 3                        | 3.19                  | 3                        | 3.22                  | 3                        | 3.09                  | 3                        |
| 14031278  | 2.46                  | 2                        | 2.51                  | 3                        | 2.92                  | 3                        | 2.63                  | 3                        |
| 14031279  | 1.29                  | 1                        | 1.44                  | 1                        | 1.39                  | 1                        | 1.37                  | 1                        |
| 14031280  | 6.21                  | 6                        | 6.12                  | 6                        | 5.39                  | 5                        | 5.91                  | 6                        |
| 14031281  | 2.19                  | 2                        | 2.12                  | 2                        | 1.91                  | 2                        | 2.07                  | 2                        |
| 14031282  | 2.32                  | 2                        | 2.41                  | 2                        | 2.03                  | 2                        | 2.25                  | 2                        |
| 14031283  | 4.60                  | 5                        | 4.00                  | 4                        | 4.27                  | 4                        | 4.29                  | 4                        |
| 14031284  | 3.77                  | 4                        | 4.17                  | 4                        | 3.59                  | 4                        | 3.84                  | 4                        |
| 14031285  | 1.89                  | 2                        | 1.96                  | 2                        | 1.95                  | 2                        | 1.93                  | 2                        |
| 14031286  | 2.59                  | 3                        | 3.29                  | 3                        | 2.33                  | 2                        | 2.73                  | 3                        |
| 14031287  | 1.63                  | 2                        | 1.58                  | 2                        | 1.71                  | 2                        | 1.64                  | 2                        |
| 14031288  | 1.54                  | 2                        | 1.70                  | 2                        | 1.73                  | 2                        | 1.66                  | 2                        |
| 14031289  | 2.03                  | 2                        | 2.01                  | 2                        | 2.02                  | 2                        | 2.02                  | 2                        |
| 14031290  | 3.12                  | 3                        | 3.00                  | 3                        | 2.63                  | 3                        | 2.92                  | 3                        |
| 14031291  | 2.30                  | 2                        | 2.05                  | 2                        | 1.94                  | 2                        | 2.10                  | 2                        |
| 14031292  | 2.13                  | 2                        | 2.30                  | 2                        | 2.29                  | 2                        | 2.24                  | 2                        |
| 14031293  | 4.83                  | 5                        | 4.24                  | 4                        | 4.32                  | 4                        | 4.47                  | 4                        |



| Sample ID | Copy Number           |                          |                       |                          |                       |                          |                       |                          |
|-----------|-----------------------|--------------------------|-----------------------|--------------------------|-----------------------|--------------------------|-----------------------|--------------------------|
|           | r = 1                 |                          | r = 2                 |                          | r = 3                 |                          | Average               |                          |
|           | Ratio<br>(target/ref) | Estimated<br>Copy Number |
| 14031294  | 2.14                  | 2                        | 2.07                  | 2                        | 2.16                  | 2                        | 2.13                  | 2                        |
| 14031295  | 2.55                  | 3                        | 1.99                  | 2                        | 2.27                  | 2                        | 2.27                  | 2                        |
| 14031296  | 3.00                  | 3                        | 2.89                  | 3                        | 3.00                  | 3                        | 2.96                  | 3                        |
| 14031297  | 3.35                  | 3                        | 2.87                  | 3                        | 2.70                  | 3                        | 2.98                  | 3                        |
| 14031298  | 2.22                  | 2                        | 2.11                  | 2                        | 2.01                  | 2                        | 2.11                  | 2                        |
| 14031299  | 2.54                  | 3                        | 2.23                  | 2                        | 2.02                  | 2                        | 2.26                  | 2                        |
| 14031300  | 1.94                  | 2                        | 2.08                  | 2                        | 2.12                  | 2                        | 2.05                  | 2                        |
| 14031301  | 2.07                  | 2                        | 2.18                  | 2                        | 2.22                  | 2                        | 2.16                  | 2                        |
| 14031302  | 7.04                  | 7                        | 7.48                  | 7                        | 7.29                  | 7                        | 7.27                  | 7                        |
| 14031303  | 6.66                  | 7                        | 5.66                  | 6                        | 6.46                  | 6                        | 6.26                  | 6                        |
| 14031304  | 1.12                  | 1                        | 1.06                  | 1                        | 1.09                  | 1                        | 1.09                  | 1                        |
| 14031305  | 1.24                  | 1                        | 1.14                  | 1                        | 1.13                  | 1                        | 1.17                  | 1                        |
| 14031306  | 1.15                  | 1                        | 1.15                  | 1                        | 1.15                  | 1                        | 1.15                  | 1                        |
| 14031307  | 1.42                  | 1                        | 1.23                  | 1                        | 1.24                  | 1                        | 1.30                  | 1                        |
| 14031308  | 1.08                  | 1                        | 1.06                  | 1                        | 1.09                  | 1                        | 1.08                  | 1                        |
| 14031309  | 4.56                  | 5                        | 4.08                  | 4                        | 4.39                  | 4                        | 4.34                  | 4                        |
| 14031310  | 0.38                  | 0                        | 0.33                  | 0                        | 0.46                  | 0                        | 0.39                  | 0                        |
| 14031311  | 0.85                  | 1                        | 0.84                  | 1                        | 0.86                  | 1                        | 0.85                  | 1                        |
| 14031312  | 2.48                  | 2                        | 2.56                  | 3                        | 2.98                  | 3                        | 2.67                  | 3                        |

| Sample ID | Copy Number           |                          |                       |                          |                       |                          |                       |                          |
|-----------|-----------------------|--------------------------|-----------------------|--------------------------|-----------------------|--------------------------|-----------------------|--------------------------|
|           | r = 1                 |                          | r = 2                 |                          | r = 3                 |                          | Average               |                          |
|           | Ratio<br>(target/ref) | Estimated<br>Copy Number |
| 14031313  | 0.27                  | 0                        | 0.25                  | 0                        | 0.30                  | 0                        | 0.27                  | 0                        |
| 14031314  | 1.31                  | 1                        | 1.24                  | 1                        | 1.28                  | 1                        | 1.28                  | 1                        |
| 14031315  | 4.43                  | 4                        | 4.05                  | 4                        | 4.33                  | 4                        | 4.27                  | 4                        |
| 14031316  | 2.00                  | 2                        | 2.08                  | 2                        | 2.04                  | 2                        | 2.04                  | 2                        |
| 14031317  | 2.19                  | 2                        | 1.99                  | 2                        | 2.32                  | 2                        | 2.17                  | 2                        |
| 14031318  | 1.17                  | 1                        | 1.14                  | 1                        | 1.11                  | 1                        | 1.14                  | 1                        |
| 14031319  | 1.14                  | 1                        | 1.23                  | 1                        | 1.12                  | 1                        | 1.16                  | 1                        |
| 14031320  | 0.37                  | 0                        | 0.42                  | 0                        | 0.44                  | 0                        | 0.41                  | 0                        |
| 14031321  | 4.57                  | 5                        | 4.36                  | 4                        | 5.08                  | 5                        | 4.67                  | 5                        |
| 14031322  | 0.99                  | 1                        | 1.03                  | 1                        | 1.01                  | 1                        | 1.01                  | 1                        |
| 14031323  | 1.08                  | 1                        | 1.04                  | 1                        | 1.11                  | 1                        | 1.08                  | 1                        |
| 14031324  | 1.07                  | 1                        | 1.17                  | 1                        | 1.01                  | 1                        | 1.09                  | 1                        |
| 14031325  | 1.18                  | 1                        | 1.27                  | 1                        | 1.12                  | 1                        | 1.19                  | 1                        |
| 14031326  | 1.03                  | 1                        | 1.15                  | 1                        | 1.20                  | 1                        | 1.13                  | 1                        |
| 14031327  | 0.95                  | 1                        | 1.07                  | 1                        | 1.09                  | 1                        | 1.03                  | 1                        |
| 14031328  | 0.90                  | 1                        | 0.83                  | 1                        | 0.88                  | 1                        | 0.87                  | 1                        |
| 14031329  | 1.18                  | 1                        | 1.19                  | 1                        | 1.24                  | 1                        | 1.21                  | 1                        |
| 14031330  | 1.91                  | 2                        | 2.07                  | 2                        | 1.98                  | 2                        | 1.99                  | 2                        |
| 14031331  | 1.17                  | 1                        | 1.20                  | 1                        | 1.26                  | 1                        | 1.21                  | 1                        |

| Sample ID | Copy Number           |                          |                       |                          |                       |                          |                       |                          |
|-----------|-----------------------|--------------------------|-----------------------|--------------------------|-----------------------|--------------------------|-----------------------|--------------------------|
|           | r = 1                 |                          | r = 2                 |                          | r = 3                 |                          | Average               |                          |
|           | Ratio<br>(target/ref) | Estimated<br>Copy Number |
| 14031332  | 1.15                  | 1                        | 1.11                  | 1                        | 1.00                  | 1                        | 1.09                  | 1                        |
| 14031333  | 2.46                  | 2                        | 2.35                  | 2                        | 2.20                  | 2                        | 2.34                  | 2                        |
| 14031334  | 2.84                  | 3                        | 3.01                  | 3                        | 2.94                  | 3                        | 2.93                  | 3                        |
| 14031335  | 0.68                  | 1                        | 0.70                  | 1                        | 0.79                  | 1                        | 0.72                  | 1                        |
| 14031336  | 2.43                  | 2                        | 2.25                  | 2                        | 2.30                  | 2                        | 2.33                  | 2                        |
| 14031337  | 1.34                  | 1                        | 1.38                  | 1                        | 1.39                  | 1                        | 1.37                  | 1                        |
| 14031338  | 1.68                  | 2                        | 1.68                  | 2                        | 1.66                  | 2                        | 1.67                  | 2                        |
| 14031339  | 3.34                  | 3                        | 3.19                  | 3                        | 3.08                  | 3                        | 3.20                  | 3                        |
| 14031340  | 21.61                 | 22                       | 21.94                 | 22                       | 20.19                 | 20                       | 21.25                 | 21                       |
| 14031341  | 22.05                 | 22                       | 20.14                 | 20                       | 19.57                 | 20                       | 20.59                 | 21                       |
| 14031342  | 2.07                  | 2                        | 2.20                  | 2                        | 2.24                  | 2                        | 2.17                  | 2                        |
| 14031343  | 3.41                  | 3                        | 3.08                  | 3                        | 2.84                  | 3                        | 3.11                  | 3                        |
| 14031344  | 1.39                  | 1                        | 1.57                  | 2                        | 1.55                  | 2                        | 1.50                  | 2                        |
| 14031345  | 2.43                  | 2                        | 2.10                  | 2                        | 2.19                  | 2                        | 2.24                  | 2                        |
| 14031346  | 5.21                  | 5                        | 6.88                  | 7                        | 5.61                  | 6                        | 5.90                  | 6                        |
| 14031347  | 4.03                  | 4                        | 3.34                  | 3                        | 3.57                  | 4                        | 3.65                  | 4                        |
| 14031348  | 5.39                  | 5                        | 4.79                  | 5                        | 5.11                  | 5                        | 5.10                  | 5                        |
| 14031349  | 1.47                  | 1                        | 1.35                  | 1                        | 1.38                  | 1                        | 1.40                  | 1                        |
| 14031350  | 1.29                  | 1                        | 1.29                  | 1                        | 1.26                  | 1                        | 1.28                  | 1                        |

| Sample ID | Copy Number           |                          |                       |                          |                       |                          |                       |                          |
|-----------|-----------------------|--------------------------|-----------------------|--------------------------|-----------------------|--------------------------|-----------------------|--------------------------|
|           | r = 1                 |                          | r = 2                 |                          | r = 3                 |                          | Average               |                          |
|           | Ratio<br>(target/ref) | Estimated<br>Copy Number |
| 14031351  | 11.35                 | 11                       | 11.71                 | 12                       | 11.69                 | 12                       | 11.58                 | 12                       |
| 14031352  | 2.35                  | 2                        | 2.36                  | 2                        | 2.30                  | 2                        | 2.34                  | 2                        |
| 14031353  | 1.09                  | 1                        | 1.10                  | 1                        | 1.05                  | 1                        | 1.08                  | 1                        |
| 14031354  | 1.61                  | 2                        | 1.66                  | 2                        | 1.82                  | 2                        | 1.69                  | 2                        |
| 14031355  | 2.03                  | 2                        | 2.23                  | 2                        | 2.22                  | 2                        | 2.16                  | 2                        |
| 14031356  | 2.37                  | 2                        | 2.29                  | 2                        | 2.41                  | 2                        | 2.36                  | 2                        |
| 14031357  | 2.11                  | 2                        | 2.07                  | 2                        | 2.35                  | 2                        | 2.18                  | 2                        |
| 14031358  | 2.41                  | 2                        | 2.22                  | 2                        | 2.16                  | 2                        | 2.26                  | 2                        |
| 14031359  | 3.36                  | 3                        | 3.17                  | 3                        | 3.37                  | 3                        | 3.30                  | 3                        |
| 14031360  | 1.18                  | 1                        | 1.19                  | 1                        | 1.36                  | 1                        | 1.25                  | 1                        |
| 14031361  | 1.31                  | 1                        | 1.33                  | 1                        | 1.36                  | 1                        | 1.33                  | 1                        |
| 14031362  | 5.81                  | 6                        | 6.34                  | 6                        | 6.42                  | 6                        | 6.19                  | 6                        |
| 14031363  | 4.09                  | 4                        | 3.69                  | 4                        | 3.97                  | 4                        | 3.92                  | 4                        |
| 14031364  | 1.15                  | 1                        | 1.20                  | 1                        | 1.18                  | 1                        | 1.18                  | 1                        |
| 14031365  | 3.84                  | 4                        | 3.82                  | 4                        | 3.46                  | 3                        | 3.71                  | 4                        |
| 14031366  | 1.24                  | 1                        | 1.43                  | 1                        | 1.27                  | 1                        | 1.32                  | 1                        |
| 14031367  | 3.32                  | 3                        | 3.15                  | 3                        | 3.36                  | 3                        | 3.27                  | 3                        |
| 14031368  | 3.06                  | 3                        | 2.80                  | 3                        | 3.06                  | 3                        | 2.97                  | 3                        |
| 14031369  | 10.75                 | 11                       | 11.95                 | 12                       | 13.44                 | 13                       | 12.04                 | 12                       |

| Sample ID | Copy Number           |                          |                       |                          |                       |                          |                       |                          |
|-----------|-----------------------|--------------------------|-----------------------|--------------------------|-----------------------|--------------------------|-----------------------|--------------------------|
|           | r = 1                 |                          | r = 2                 |                          | r = 3                 |                          | Average               |                          |
|           | Ratio<br>(target/ref) | Estimated<br>Copy Number |
| 14031370  | 4.81                  | 5                        | 4.72                  | 5                        | 5.28                  | 5                        | 4.94                  | 5                        |
| 14031371  | 1.26                  | 1                        | 1.28                  | 1                        | 1.22                  | 1                        | 1.25                  | 1                        |
| 14031372  | 1.79                  | 2                        | 1.83                  | 2                        | 1.51                  | 2                        | 1.71                  | 2                        |
| 14031373  | 1.34                  | 1                        | 1.24                  | 1                        | 1.27                  | 1                        | 1.28                  | 1                        |
| 14031374  | 0.14                  | 0                        | 0.13                  | 0                        | 0.14                  | 0                        | 0.14                  | 0                        |
| 14031375  | 2.78                  | 3                        | 2.81                  | 3                        | 2.87                  | 3                        | 2.82                  | 3                        |
| 14031376  | 1.36                  | 1                        | 1.10                  | 1                        | 1.47                  | 1                        | 1.31                  | 1                        |
| 14031377  | 1.37                  | 1                        | 1.49                  | 1                        | 1.31                  | 1                        | 1.39                  | 1                        |
| 14031378  | 1.29                  | 1                        | 1.12                  | 1                        | 1.28                  | 1                        | 1.23                  | 1                        |
| 14031379  | 3.88                  | 4                        | 4.53                  | 5                        | 3.32                  | 3                        | 3.91                  | 4                        |
| 14031380  | 1.30                  | 1                        | 1.40                  | 1                        | 1.33                  | 1                        | 1.34                  | 1                        |
| 14031381  | 3.32                  | 3                        | 3.27                  | 3                        | 2.93                  | 3                        | 3.17                  | 3                        |
| 14031382  | 3.38                  | 3                        | 3.98                  | 4                        | 3.85                  | 4                        | 3.74                  | 4                        |
| 14031383  | 2.36                  | 2                        | 1.47                  | 1                        | 1.31                  | 1                        | 1.72                  | 2                        |
| 14031384  | 3.10                  | 3                        | 2.65                  | 3                        | 2.87                  | 3                        | 2.88                  | 3                        |
| 14031385  | 2.69                  | 3                        | 2.61                  | 3                        | 2.27                  | 2                        | 2.52                  | 3                        |
| 14031386  | 2.44                  | 2                        | 2.18                  | 2                        | 2.34                  | 2                        | 2.32                  | 2                        |
| 14031387  | 1.42                  | 1                        | 1.46                  | 1                        | 1.53                  | 2                        | 1.47                  | 1                        |
| 14031388  | 2.54                  | 3                        | 2.74                  | 3                        | 2.82                  | 3                        | 2.70                  | 3                        |

| Sample ID | Copy Number           |                          |                       |                          |                       |                          |                       |                          |
|-----------|-----------------------|--------------------------|-----------------------|--------------------------|-----------------------|--------------------------|-----------------------|--------------------------|
|           | r = 1                 |                          | r = 2                 |                          | r = 3                 |                          | Average               |                          |
|           | Ratio<br>(target/ref) | Estimated<br>Copy Number |
| 14031389  | 3.37                  | 3                        | 3.59                  | 4                        | 3.73                  | 4                        | 3.56                  | 4                        |
| 14031390  | 8.09                  | 8                        | 8.89                  | 9                        | 8.49                  | 8                        | 8.49                  | 8                        |
| 14031391  | 21.24                 | 21                       | 21.62                 | 22                       | 18.80                 | 19                       | 20.55                 | 21                       |
| 14031392  | 9.58                  | 10                       | 10.14                 | 10                       | 9.23                  | 9                        | 9.65                  | 10                       |
| 14031393  | 1.66                  | 2                        | 1.37                  | 1                        | 1.44                  | 1                        | 1.49                  | 1                        |
| 14031394  | 2.89                  | 3                        | 2.59                  | 3                        | 2.56                  | 3                        | 2.68                  | 3                        |
| 14031395  | 2.53                  | 3                        | 2.65                  | 3                        | 2.22                  | 2                        | 2.47                  | 2                        |
| 14031396  | 5.19                  | 5                        | 4.84                  | 5                        | 4.36                  | 4                        | 4.80                  | 5                        |
| 14031397  | 3.75                  | 4                        | 4.12                  | 4                        | 4.00                  | 4                        | 3.96                  | 4                        |
| 14031398  | 2.50                  | 2                        | 2.70                  | 3                        | 2.22                  | 2                        | 2.48                  | 2                        |
| 14031399  | 3.35                  | 3                        | 2.58                  | 3                        | 2.67                  | 3                        | 2.87                  | 3                        |
| 14031400  | 2.72                  | 3                        | 2.26                  | 2                        | 2.57                  | 3                        | 2.51                  | 3                        |
| 14031401  | 1.37                  | 1                        | 1.23                  | 1                        | 0.75                  | 1                        | 1.12                  | 1                        |
| 14031402  | 2.71                  | 3                        | 2.85                  | 3                        | 1.99                  | 2                        | 2.52                  | 3                        |
| 14031403  | 2.24                  | 2                        | 1.90                  | 2                        | 1.86                  | 2                        | 2.00                  | 2                        |
| 14031404  | 4.75                  | 5                        | 4.75                  | 5                        | 4.73                  | 5                        | 4.74                  | 5                        |
| 14031405  | 3.28                  | 3                        | 3.47                  | 3                        | 3.36                  | 3                        | 3.37                  | 3                        |
| 14031406  | 1.28                  | 1                        | 1.01                  | 1                        | 1.24                  | 1                        | 1.17                  | 1                        |
| 14031407  | 2.43                  | 2                        | 1.82                  | 2                        | 2.54                  | 3                        | 2.26                  | 2                        |

| Sample ID | Copy Number           |                          |                       |                          |                       |                          |                       |                          |
|-----------|-----------------------|--------------------------|-----------------------|--------------------------|-----------------------|--------------------------|-----------------------|--------------------------|
|           | r = 1                 |                          | r = 2                 |                          | r = 3                 |                          | Average               |                          |
|           | Ratio<br>(target/ref) | Estimated<br>Copy Number |
| 14031408  | 3.88                  | 4                        | 3.43                  | 3                        | 3.41                  | 3                        | 3.58                  | 4                        |
| 14031409  | 4.57                  | 5                        | 4.10                  | 4                        | 4.31                  | 4                        | 4.33                  | 4                        |
| 14031410  | 1.29                  | 1                        | 1.24                  | 1                        | 1.32                  | 1                        | 1.28                  | 1                        |
| 14031411  | 1.47                  | 1                        | 1.20                  | 1                        | 1.45                  | 1                        | 1.38                  | 1                        |
| 14031412  | 2.92                  | 3                        | 2.93                  | 3                        | 2.69                  | 3                        | 2.85                  | 3                        |
| 14031413  | 1.42                  | 1                        | 1.46                  | 1                        | 1.61                  | 2                        | 1.50                  | 1                        |
| 14031414  | 1.57                  | 2                        | 1.73                  | 2                        | 1.84                  | 2                        | 1.71                  | 2                        |
| 14031415  | 3.52                  | 4                        | 3.59                  | 4                        | 3.53                  | 4                        | 3.54                  | 4                        |
| 14031416  | 2.59                  | 3                        | 2.84                  | 3                        | 2.78                  | 3                        | 2.74                  | 3                        |
| 14031417  | 2.53                  | 3                        | 2.95                  | 3                        | 3.32                  | 3                        | 2.93                  | 3                        |
| 14031418  | 2.74                  | 3                        | 3.29                  | 3                        | 3.33                  | 3                        | 3.12                  | 3                        |
| 14031419  | 17.90                 | 18                       | 17.63                 | 18                       | 17.88                 | 18                       | 17.80                 | 18                       |
| 14031420  | 2.53                  | 3                        | 2.55                  | 3                        | 2.43                  | 2                        | 2.50                  | 3                        |
| 14031421  | 1.32                  | 1                        | 1.32                  | 1                        | 1.26                  | 1                        | 1.30                  | 1                        |
| 14031422  | 4.27                  | 4                        | 4.40                  | 4                        | 4.62                  | 5                        | 4.43                  | 4                        |
| 14031423  | 1.29                  | 1                        | 1.17                  | 1                        | 1.16                  | 1                        | 1.21                  | 1                        |
| 14031424  | 3.56                  | 4                        | 3.62                  | 4                        | 3.63                  | 4                        | 3.60                  | 4                        |
| 14031425  | 3.29                  | 3                        | 2.91                  | 3                        | 3.33                  | 3                        | 3.18                  | 3                        |
| 14031426  | 3.55                  | 4                        | 3.60                  | 4                        | 3.22                  | 3                        | 3.46                  | 3                        |

| Sample ID | Copy Number           |                          |                       |                          |                       |                          |                       |                          |
|-----------|-----------------------|--------------------------|-----------------------|--------------------------|-----------------------|--------------------------|-----------------------|--------------------------|
|           | r = 1                 |                          | r = 2                 |                          | r = 3                 |                          | Average               |                          |
|           | Ratio<br>(target/ref) | Estimated<br>Copy Number |
| 14031427  | 4.25                  | 4                        | 3.68                  | 4                        | 3.77                  | 4                        | 3.90                  | 4                        |
| 14031428  | 9.49                  | 9                        | 9.40                  | 9                        | 8.82                  | 9                        | 9.24                  | 9                        |
| 14031429  | 3.15                  | 3                        | 3.03                  | 3                        | 3.11                  | 3                        | 3.10                  | 3                        |
| 14031430  | 4.39                  | 4                        | 4.40                  | 4                        | 4.41                  | 4                        | 4.40                  | 4                        |
| 14031431  | 1.18                  | 1                        | 1.08                  | 1                        | 1.13                  | 1                        | 1.13                  | 1                        |
| 14031432  | 2.68                  | 3                        | 2.59                  | 3                        | 2.53                  | 3                        | 2.60                  | 3                        |
| 14031433  | 1.45                  | 1                        | 1.38                  | 1                        | 1.22                  | 1                        | 1.35                  | 1                        |
| 14031434  | 1.53                  | 2                        | 1.35                  | 1                        | 1.34                  | 1                        | 1.40                  | 1                        |
| 14031435  | 7.09                  | 7                        | 6.34                  | 6                        | 6.18                  | 6                        | 6.54                  | 7                        |
| 14031436  | 1.26                  | 1                        | 1.24                  | 1                        | 1.12                  | 1                        | 1.21                  | 1                        |
| 14031437  | 1.16                  | 1                        | 1.17                  | 1                        | 1.05                  | 1                        | 1.13                  | 1                        |
| 14031438  | 2.23                  | 2                        | 2.41                  | 2                        | 2.35                  | 2                        | 2.33                  | 2                        |
| 14031439  | 5.09                  | 5                        | 5.47                  | 5                        | 4.81                  | 5                        | 5.12                  | 5                        |
| 14031440  | 1.20                  | 1                        | 1.05                  | 1                        | 0.99                  | 1                        | 1.08                  | 1                        |
| 14031441  | 1.24                  | 1                        | 1.19                  | 1                        | 1.18                  | 1                        | 1.21                  | 1                        |
| 14031442  | 2.43                  | 2                        | 2.02                  | 2                        | 2.23                  | 2                        | 2.23                  | 2                        |
| 14031443  | 5.96                  | 6                        | 6.27                  | 6                        | 6.36                  | 6                        | 6.19                  | 6                        |
| 14031444  | 6.46                  | 6                        | 7.02                  | 7                        | 6.85                  | 7                        | 6.78                  | 7                        |
| 14031445  | 2.27                  | 2                        | 2.15                  | 2                        | 1.99                  | 2                        | 2.14                  | 2                        |



| Sample ID | Copy Number           |                          |                       |                          |                       |                          |                       |                          |
|-----------|-----------------------|--------------------------|-----------------------|--------------------------|-----------------------|--------------------------|-----------------------|--------------------------|
|           | r = 1                 |                          | r = 2                 |                          | r = 3                 |                          | Average               |                          |
|           | Ratio<br>(target/ref) | Estimated<br>Copy Number |
| 14031446  | 2.36                  | 2                        | 2.11                  | 2                        | 1.97                  | 2                        | 2.15                  | 2                        |
| 14031447  | 1.38                  | 1                        | 1.21                  | 1                        | 1.20                  | 1                        | 1.27                  | 1                        |
| 14031448  | 1.19                  | 1                        | 1.16                  | 1                        | 1.21                  | 1                        | 1.18                  | 1                        |
| 14031449  | 1.10                  | 1                        | 1.02                  | 1                        | 1.14                  | 1                        | 1.09                  | 1                        |
| 14031450  | 0.90                  | 1                        | 0.83                  | 1                        | 0.83                  | 1                        | 0.85                  | 1                        |
| 14031451  | 4.31                  | 4                        | 4.59                  | 5                        | 4.76                  | 5                        | 4.55                  | 5                        |
| 14031452  | 5.46                  | 5                        | 5.41                  | 5                        | 5.78                  | 6                        | 5.55                  | 6                        |
| 14031453  | 5.86                  | 6                        | 5.98                  | 6                        | 5.63                  | 6                        | 5.82                  | 6                        |
| 14031454  | 1.50                  | 2                        | 1.54                  | 2                        | 1.53                  | 2                        | 1.52                  | 2                        |
| 14031455  | 1.22                  | 1                        | 1.06                  | 1                        | 1.30                  | 1                        | 1.19                  | 1                        |
| 14031456  | 1.25                  | 1                        | 1.33                  | 1                        | 1.25                  | 1                        | 1.28                  | 1                        |
| 14031457  | 1.05                  | 1                        | 1.07                  | 1                        | 1.09                  | 1                        | 1.07                  | 1                        |
| 14031458  | 1.64                  | 2                        | 1.30                  | 1                        | 1.32                  | 1                        | 1.42                  | 1                        |
| 14031459  | 1.13                  | 1                        | 1.04                  | 1                        | 1.25                  | 1                        | 1.14                  | 1                        |
| 14031460  | 0.41                  | 0                        | 0.45                  | 0                        | 0.44                  | 0                        | 0.43                  | 0                        |
| 14031461  | 1.38                  | 1                        | 1.37                  | 1                        | 1.44                  | 1                        | 1.40                  | 1                        |
| 14031462  | 3.97                  | 4                        | 3.84                  | 4                        | 4.13                  | 4                        | 3.98                  | 4                        |
| 14031463  | 0.51                  | 1                        | 0.44                  | 0                        | 0.54                  | 1                        | 0.49                  | 0                        |
| 14031464  | 11.36                 | 11                       | 10.24                 | 10                       | 10.66                 | 11                       | 10.75                 | 11                       |

| Sample ID | Copy Number           |                          |                       |                          |                       |                          |                       |                          |
|-----------|-----------------------|--------------------------|-----------------------|--------------------------|-----------------------|--------------------------|-----------------------|--------------------------|
|           | r = 1                 |                          | r = 2                 |                          | r = 3                 |                          | Average               |                          |
|           | Ratio<br>(target/ref) | Estimated<br>Copy Number |
| 14031465  | 1.88                  | 2                        | 1.88                  | 2                        | 1.83                  | 2                        | 1.86                  | 2                        |
| 14031466  | 4.67                  | 5                        | 5.23                  | 5                        | 4.87                  | 5                        | 4.92                  | 5                        |
| 14031467  | 1.92                  | 2                        | 1.99                  | 2                        | 2.24                  | 2                        | 2.05                  | 2                        |
| 14031468  | 2.19                  | 2                        | 2.37                  | 2                        | 2.34                  | 2                        | 2.30                  | 2                        |
| 14031469  | 2.03                  | 2                        | 2.13                  | 2                        | 1.92                  | 2                        | 2.03                  | 2                        |
| 14031470  | 1.18                  | 1                        | 1.08                  | 1                        | 1.15                  | 1                        | 1.14                  | 1                        |
| 14031471  | 1.17                  | 1                        | 1.20                  | 1                        | 1.11                  | 1                        | 1.16                  | 1                        |
| 14031472  | 1.14                  | 1                        | 1.18                  | 1                        | 1.22                  | 1                        | 1.18                  | 1                        |
| 14031473  | 1.79                  | 2                        | 1.66                  | 2                        | 1.88                  | 2                        | 1.78                  | 2                        |
| 14031474  | 3.52                  | 4                        | 3.59                  | 4                        | 3.35                  | 3                        | 3.49                  | 3                        |
| 14031475  | 2.99                  | 3                        | 2.83                  | 3                        | 3.14                  | 3                        | 2.99                  | 3                        |
| 14031476  | 2.86                  | 3                        | 3.05                  | 3                        | 2.91                  | 3                        | 2.94                  | 3                        |
| 14031477  | 1.09                  | 1                        | 1.14                  | 1                        | 1.08                  | 1                        | 1.10                  | 1                        |
| 14031478  | 0.97                  | 1                        | 0.94                  | 1                        | 1.08                  | 1                        | 1.00                  | 1                        |
| 14031479  | 1.10                  | 1                        | 1.35                  | 1                        | 1.00                  | 1                        | 1.15                  | 1                        |
| 14031480  | 1.61                  | 2                        | 1.40                  | 1                        | 1.60                  | 2                        | 1.54                  | 2                        |
| 14031481  | 8.58                  | 9                        | 8.60                  | 9                        | 9.94                  | 10                       | 9.04                  | 9                        |
| 14031482  | 1.32                  | 1                        | 1.28                  | 1                        | 1.20                  | 1                        | 1.26                  | 1                        |
| 14031483  | 1.06                  | 1                        | 1.01                  | 1                        | 1.11                  | 1                        | 1.06                  | 1                        |

| Sample ID | Copy Number           |                          |                       |                          |                       |                          |                       |                          |
|-----------|-----------------------|--------------------------|-----------------------|--------------------------|-----------------------|--------------------------|-----------------------|--------------------------|
|           | r = 1                 |                          | r = 2                 |                          | r = 3                 |                          | Average               |                          |
|           | Ratio<br>(target/ref) | Estimated<br>Copy Number |
| 14031484  | 1.04                  | 1                        | 1.14                  | 1                        | 1.21                  | 1                        | 1.13                  | 1                        |
| 14031485  | 1.26                  | 1                        | 1.16                  | 1                        | 1.39                  | 1                        | 1.27                  | 1                        |
| 14031486  | 3.69                  | 4                        | 3.67                  | 4                        | 3.77                  | 4                        | 3.71                  | 4                        |
| 14031487  | 5.81                  | 6                        | 5.45                  | 5                        | 5.72                  | 6                        | 5.66                  | 6                        |
| 14031488  | 1.78                  | 2                        | 1.85                  | 2                        | 1.87                  | 2                        | 1.83                  | 2                        |
| 14031489  | 1.46                  | 1                        | 1.58                  | 2                        | 1.49                  | 1                        | 1.51                  | 2                        |
| 14031490  | 1.75                  | 2                        | 1.78                  | 2                        | 1.75                  | 2                        | 1.76                  | 2                        |
| 14031491  | 1.16                  | 1                        | 1.26                  | 1                        | 1.10                  | 1                        | 1.17                  | 1                        |
| 14031492  | 2.19                  | 2                        | 2.22                  | 2                        | 2.19                  | 2                        | 2.20                  | 2                        |
| 14031493  | 1.08                  | 1                        | 0.95                  | 1                        | 1.04                  | 1                        | 1.03                  | 1                        |
| 14031494  | 1.29                  | 1                        | 1.23                  | 1                        | 1.15                  | 1                        | 1.22                  | 1                        |
| 14031495  | 1.26                  | 1                        | 1.11                  | 1                        | 1.13                  | 1                        | 1.17                  | 1                        |
| 14040963  | 1.20                  | 1                        | 1.17                  | 1                        | 1.16                  | 1                        | 1.18                  | 1                        |
| 14040964  | 49.74                 | 50                       | 41.99                 | 42                       | 36.19                 | 36                       | 42.64                 | 43                       |
| 14040967  | 1.81                  | 2                        | 1.49                  | 1                        | 1.65                  | 2                        | 1.65                  | 2                        |
| 14040971  | 1.08                  | 1                        | 0.96                  | 1                        | 0.96                  | 1                        | 1.00                  | 1                        |
| 14040972  | 2.12                  | 2                        | 2.24                  | 2                        | 2.21                  | 2                        | 2.19                  | 2                        |
| 14040974  | 2.19                  | 2                        | 2.35                  | 2                        | 2.63                  | 3                        | 2.39                  | 2                        |
| 14040976  | 3.06                  | 3                        | 2.79                  | 3                        | 2.99                  | 3                        | 2.95                  | 3                        |

| Sample ID | Copy Number           |                          |                       |                          |                       |                          |                       |                          |
|-----------|-----------------------|--------------------------|-----------------------|--------------------------|-----------------------|--------------------------|-----------------------|--------------------------|
|           | r = 1                 |                          | r = 2                 |                          | r = 3                 |                          | Average               |                          |
|           | Ratio<br>(target/ref) | Estimated<br>Copy Number |
| 14040977  | 2.91                  | 3                        | 2.64                  | 3                        | 2.22                  | 2                        | 2.59                  | 3                        |
| 14040978  | 5.63                  | 6                        | 5.89                  | 6                        | 6.17                  | 6                        | 5.90                  | 6                        |
| 14040979  | 2.28                  | 2                        | 2.05                  | 2                        | 2.24                  | 2                        | 2.19                  | 2                        |
| 14040980  | 1.84                  | 2                        | 1.97                  | 2                        | 1.83                  | 2                        | 1.88                  | 2                        |
| 14040982  | 1.89                  | 2                        | 1.76                  | 2                        | 1.12                  | 1                        | 1.59                  | 2                        |
| 14040983  | 1.69                  | 2                        | 1.92                  | 2                        | 1.84                  | 2                        | 1.82                  | 2                        |
| 14040985  | 1.66                  | 2                        | 1.80                  | 2                        | 1.84                  | 2                        | 1.77                  | 2                        |
| 14040986  | 1.62                  | 2                        | 1.60                  | 2                        | 1.82                  | 2                        | 1.68                  | 2                        |
| 14040987  | 1.91                  | 2                        | 2.22                  | 2                        | 2.43                  | 2                        | 2.19                  | 2                        |
| 14040988  | 1.19                  | 1                        | 1.10                  | 1                        | 1.10                  | 1                        | 1.13                  | 1                        |
| 14040989  | 1.03                  | 1                        | 1.06                  | 1                        | 1.37                  | 1                        | 1.15                  | 1                        |
| 14040990  | 1.24                  | 1                        | 1.20                  | 1                        | 1.25                  | 1                        | 1.23                  | 1                        |
| 14040991  | 1.14                  | 1                        | 1.14                  | 1                        | 1.16                  | 1                        | 1.15                  | 1                        |
| 14040992  | 1.10                  | 1                        | 1.18                  | 1                        | 1.23                  | 1                        | 1.17                  | 1                        |
| 14040993  | 1.02                  | 1                        | 1.09                  | 1                        | 0.94                  | 1                        | 1.02                  | 1                        |
| 14040994  | 0.88                  | 1                        | 1.00                  | 1                        | 1.07                  | 1                        | 0.98                  | 1                        |
| 14040995  | 1.06                  | 1                        | 1.15                  | 1                        | 1.07                  | 1                        | 1.09                  | 1                        |
| 14040999  | 1.85                  | 2                        | 2.16                  | 2                        | 1.71                  | 2                        | 1.90                  | 2                        |
| 14041000  | 2.34                  | 2                        | 2.42                  | 2                        | 2.56                  | 3                        | 2.44                  | 2                        |

| Sample ID | Copy Number           |                          |                       |                          |                       |                          |                       |                          |
|-----------|-----------------------|--------------------------|-----------------------|--------------------------|-----------------------|--------------------------|-----------------------|--------------------------|
|           | r = 1                 |                          | r = 2                 |                          | r = 3                 |                          | Average               |                          |
|           | Ratio<br>(target/ref) | Estimated<br>Copy Number |
| 14041001  | 1.18                  | 1                        | 1.12                  | 1                        | 1.04                  | 1                        | 1.11                  | 1                        |
| 14041002  | 1.03                  | 1                        | 1.02                  | 1                        | 1.05                  | 1                        | 1.04                  | 1                        |
| 14041003  | 4.03                  | 4                        | 4.21                  | 4                        | 3.57                  | 4                        | 3.94                  | 4                        |
| 14041006  | 1.12                  | 1                        | 1.03                  | 1                        | 1.13                  | 1                        | 1.09                  | 1                        |
| 14041007  | 1.16                  | 1                        | 1.03                  | 1                        | 1.13                  | 1                        | 1.11                  | 1                        |
| 14041009  | 2.45                  | 2                        | 2.39                  | 2                        | 2.79                  | 3                        | 2.54                  | 3                        |
| 14041010  | 1.11                  | 1                        | 1.05                  | 1                        | 1.07                  | 1                        | 1.07                  | 1                        |
| 14041011  | 4.58                  | 5                        | 4.60                  | 5                        | 3.98                  | 4                        | 4.39                  | 4                        |
| 14041012  | 3.23                  | 3                        | 3.27                  | 3                        | 3.12                  | 3                        | 3.21                  | 3                        |
| 14041013  | 3.17                  | 3                        | 3.18                  | 3                        | 3.47                  | 3                        | 3.27                  | 3                        |
| 14041014  | 4.93                  | 5                        | 5.86                  | 6                        | 5.51                  | 6                        | 5.43                  | 5                        |
| 14041015  | 3.03                  | 3                        | 3.02                  | 3                        | 2.88                  | 3                        | 2.98                  | 3                        |
| 14041016  | 6.07                  | 6                        | 5.73                  | 6                        | 5.80                  | 6                        | 5.87                  | 6                        |
| 14041017  | 1.29                  | 1                        | 1.04                  | 1                        | 1.09                  | 1                        | 1.14                  | 1                        |
| 14041018  | 1.09                  | 1                        | 1.15                  | 1                        | 1.08                  | 1                        | 1.11                  | 1                        |
| 14041019  | 0.49                  | 0                        | 0.49                  | 0                        | 0.53                  | 1                        | 0.50                  | 1                        |
| 14041020  | 3.22                  | 3                        | 3.11                  | 3                        | 3.26                  | 3                        | 3.19                  | 3                        |
| 14041021  | 1.96                  | 2                        | 2.14                  | 2                        | 1.78                  | 2                        | 1.96                  | 2                        |
| 14041023  | 0.44                  | 0                        | 0.48                  | 0                        | 0.49                  | 0                        | 0.47                  | 0                        |

| Sample ID | Copy Number           |                          |                       |                          |                       |                          |                       |                          |
|-----------|-----------------------|--------------------------|-----------------------|--------------------------|-----------------------|--------------------------|-----------------------|--------------------------|
|           | r = 1                 |                          | r = 2                 |                          | r = 3                 |                          | Average               |                          |
|           | Ratio<br>(target/ref) | Estimated<br>Copy Number |
| 14041025  | 1.74                  | 2                        | 1.61                  | 2                        | 1.40                  | 1                        | 1.58                  | 2                        |
| 14041030  | 1.03                  | 1                        | 1.08                  | 1                        | 1.02                  | 1                        | 1.04                  | 1                        |
| 14041032  | 1.01                  | 1                        | 0.99                  | 1                        | 1.06                  | 1                        | 1.02                  | 1                        |
| 14041033  | 0.99                  | 1                        | 1.01                  | 1                        | 1.00                  | 1                        | 1.00                  | 1                        |
| 14041035  | 1.44                  | 1                        | 1.41                  | 1                        | 1.52                  | 2                        | 1.45                  | 1                        |
| 14041036  | 0.88                  | 1                        | 0.86                  | 1                        | 0.95                  | 1                        | 0.90                  | 1                        |
| 14041037  | 0.11                  | 0                        | 0.09                  | 0                        | 0.08                  | 0                        | 0.09                  | 0                        |
| 14041038  | 3.40                  | 3                        | 2.79                  | 3                        | 2.99                  | 3                        | 3.06                  | 3                        |
| 14041040  | 2.01                  | 2                        | 1.90                  | 2                        | 2.05                  | 2                        | 1.99                  | 2                        |
| 14041041  | 2.22                  | 2                        | 2.12                  | 2                        | 2.10                  | 2                        | 2.15                  | 2                        |
| 14041044  | 2.21                  | 2                        | 2.09                  | 2                        | 1.98                  | 2                        | 2.09                  | 2                        |
| 14041045  | 1.14                  | 1                        | 1.13                  | 1                        | 1.05                  | 1                        | 1.11                  | 1                        |
| 14041046  | 1.09                  | 1                        | 1.12                  | 1                        | 1.18                  | 1                        | 1.13                  | 1                        |
| 14041047  | 1.17                  | 1                        | 1.08                  | 1                        | 1.18                  | 1                        | 1.14                  | 1                        |
| 14041048  | 1.11                  | 1                        | 1.06                  | 1                        | 1.04                  | 1                        | 1.07                  | 1                        |
| 14041049  | 6.05                  | 6                        | 6.34                  | 6                        | 6.16                  | 6                        | 6.18                  | 6                        |
| 14041050  | 5.51                  | 6                        | 6.25                  | 6                        | 6.92                  | 7                        | 6.23                  | 6                        |
| 14041053  | 1.96                  | 2                        | 1.93                  | 2                        | 1.92                  | 2                        | 1.94                  | 2                        |
| 14041054  | 1.87                  | 2                        | 1.90                  | 2                        | 2.07                  | 2                        | 1.95                  | 2                        |

| Sample ID | Copy Number           |                          |                       |                          |                       |                          |                       |                          |
|-----------|-----------------------|--------------------------|-----------------------|--------------------------|-----------------------|--------------------------|-----------------------|--------------------------|
|           | r = 1                 |                          | r = 2                 |                          | r = 3                 |                          | Average               |                          |
|           | Ratio<br>(target/ref) | Estimated<br>Copy Number |
| 14041055  | 2.11                  | 2                        | 1.94                  | 2                        | 1.78                  | 2                        | 1.94                  | 2                        |
| 14041056  | 2.10                  | 2                        | 2.10                  | 2                        | 1.90                  | 2                        | 2.03                  | 2                        |
| 14041059  | 1.49                  | 1                        | 1.63                  | 2                        | 1.56                  | 2                        | 1.56                  | 2                        |
| 14041060  | 0.61                  | 1                        | 0.54                  | 1                        | 0.60                  | 1                        | 0.58                  | 1                        |
| 14041063  | 1.33                  | 1                        | 1.18                  | 1                        | 1.26                  | 1                        | 1.26                  | 1                        |
| 14041064  | 1.14                  | 1                        | 1.16                  | 1                        | 1.18                  | 1                        | 1.16                  | 1                        |
| 14041066  | 1.05                  | 1                        | 1.12                  | 1                        | 1.09                  | 1                        | 1.09                  | 1                        |
| 14041068  | 3.20                  | 3                        | 2.83                  | 3                        | 3.04                  | 3                        | 3.02                  | 3                        |
| 14041069  | 13.34                 | 13                       | 12.92                 | 13                       | 15.63                 | 16                       | 13.96                 | 14                       |
| 14041073  | 3.29                  | 3                        | 3.08                  | 3                        | 3.00                  | 3                        | 3.12                  | 3                        |
| 14041077  | 2.59                  | 3                        | 2.36                  | 2                        | 2.21                  | 2                        | 2.39                  | 2                        |
| 14041082  | 2.84                  | 3                        | 2.58                  | 3                        | 2.39                  | 2                        | 2.60                  | 3                        |
| 14041083  | 3.22                  | 3                        | 3.27                  | 3                        | 3.14                  | 3                        | 3.21                  | 3                        |
| 14041085  | 4.46                  | 4                        | 4.50                  | 5                        | 4.28                  | 4                        | 4.41                  | 4                        |
| 14041087  | 1.07                  | 1                        | 1.19                  | 1                        | 1.12                  | 1                        | 1.13                  | 1                        |
| 14041088  | 7.54                  | 8                        | 7.53                  | 8                        | 7.23                  | 7                        | 7.43                  | 7                        |
| 14041089  | 5.91                  | 6                        | 6.01                  | 6                        | 5.99                  | 6                        | 5.97                  | 6                        |
| 14041092  | 2.37                  | 2                        | 2.13                  | 2                        | 2.31                  | 2                        | 2.27                  | 2                        |
| 14041093  | 1.74                  | 2                        | 1.89                  | 2                        | 2.09                  | 2                        | 1.90                  | 2                        |

| Sample ID | Copy Number           |                          |                       |                          |                       |                          |                       |                          |
|-----------|-----------------------|--------------------------|-----------------------|--------------------------|-----------------------|--------------------------|-----------------------|--------------------------|
|           | r = 1                 |                          | r = 2                 |                          | r = 3                 |                          | Average               |                          |
|           | Ratio<br>(target/ref) | Estimated<br>Copy Number |
| 14041094  | 5.73                  | 6                        | 5.92                  | 6                        | 5.55                  | 6                        | 5.73                  | 6                        |
| 14041095  | 5.48                  | 5                        | 5.25                  | 5                        | 6.44                  | 6                        | 5.72                  | 6                        |
| 14041097  | 1.24                  | 1                        | 1.30                  | 1                        | 1.13                  | 1                        | 1.22                  | 1                        |
| 14041098  | 3.38                  | 3                        | 3.22                  | 3                        | 3.71                  | 4                        | 3.44                  | 3                        |
| 14041099  | 4.99                  | 5                        | 5.08                  | 5                        | 4.88                  | 5                        | 4.98                  | 5                        |
| 14041100  | 1.44                  | 1                        | 1.45                  | 1                        | 1.45                  | 1                        | 1.45                  | 1                        |
| 14041104  | 4.59                  | 5                        | 4.35                  | 4                        | 4.16                  | 4                        | 4.36                  | 4                        |
| 14041110  | 1.86                  | 2                        | 2.26                  | 2                        | 2.08                  | 2                        | 2.07                  | 2                        |
| 14041111  | 4.59                  | 5                        | 4.59                  | 5                        | 4.84                  | 5                        | 4.67                  | 5                        |
| 14041112  | 2.57                  | 3                        | 2.87                  | 3                        | 2.60                  | 3                        | 2.68                  | 3                        |
| 14041114  | 1.01                  | 1                        | 1.13                  | 1                        | 1.10                  | 1                        | 1.08                  | 1                        |
| 14041115  | 1.03                  | 1                        | 1.04                  | 1                        | 1.05                  | 1                        | 1.04                  | 1                        |
| 14041116  | 2.73                  | 3                        | 2.68                  | 3                        | 2.60                  | 3                        | 2.67                  | 3                        |
| 14041117  | 1.22                  | 1                        | 1.06                  | 1                        | 1.07                  | 1                        | 1.12                  | 1                        |
| 14041119  | 1.17                  | 1                        | 1.12                  | 1                        | 0.99                  | 1                        | 1.09                  | 1                        |
| 14041120  | 2.26                  | 2                        | 1.91                  | 2                        | 1.95                  | 2                        | 2.04                  | 2                        |
| 14041121  | 13.46                 | 13                       | 13.80                 | 14                       | 9.77                  | 10                       | 12.34                 | 12                       |
| 14041124  | 2.23                  | 2                        | 1.96                  | 2                        | 2.32                  | 2                        | 2.17                  | 2                        |
| 14041125  | 2.18                  | 2                        | 2.22                  | 2                        | 2.17                  | 2                        | 2.19                  | 2                        |



| Sample ID | Copy Number           |                          |                       |                          |                       |                          |                       |                          |
|-----------|-----------------------|--------------------------|-----------------------|--------------------------|-----------------------|--------------------------|-----------------------|--------------------------|
|           | r = 1                 |                          | r = 2                 |                          | r = 3                 |                          | Average               |                          |
|           | Ratio<br>(target/ref) | Estimated<br>Copy Number |
| 14041129  | 4.89                  | 5                        | 5.04                  | 5                        | 4.59                  | 5                        | 4.84                  | 5                        |
| 14041130  | 1.37                  | 1                        | 1.35                  | 1                        | 1.25                  | 1                        | 1.32                  | 1                        |
| 14041131  | 1.33                  | 1                        | 1.24                  | 1                        | 1.13                  | 1                        | 1.23                  | 1                        |
| 14041138  | 2.21                  | 2                        | 1.93                  | 2                        | 1.96                  | 2                        | 2.03                  | 2                        |
| 14041139  | 2.55                  | 3                        | 2.21                  | 2                        | 2.18                  | 2                        | 2.31                  | 2                        |
| 14041140  | 3.53                  | 4                        | 3.79                  | 4                        | 3.72                  | 4                        | 3.68                  | 4                        |
| 14041141  | 4.01                  | 4                        | 3.40                  | 3                        | 3.70                  | 4                        | 3.70                  | 4                        |
| 14041142  | 4.03                  | 4                        | 4.55                  | 5                        | 4.45                  | 4                        | 4.35                  | 4                        |
| 14041143  | 3.64                  | 4                        | 3.74                  | 4                        | 3.55                  | 4                        | 3.64                  | 4                        |
| 14041145  | 1.01                  | 1                        | 1.03                  | 1                        | 1.05                  | 1                        | 1.03                  | 1                        |
| 14041146  | 0.98                  | 1                        | 0.97                  | 1                        | 1.21                  | 1                        | 1.05                  | 1                        |
| 14041147  | 1.07                  | 1                        | 1.02                  | 1                        | 1.07                  | 1                        | 1.05                  | 1                        |
| 14041149  | 0.92                  | 1                        | 0.93                  | 1                        | 1.11                  | 1                        | 0.99                  | 1                        |
| 14041150  | 1.79                  | 2                        | 1.76                  | 2                        | 1.79                  | 2                        | 1.78                  | 2                        |
| 14041151  | 5.18                  | 5                        | 5.13                  | 5                        | 5.31                  | 5                        | 5.21                  | 5                        |
| 14041152  | 3.32                  | 3                        | 3.29                  | 3                        | 3.72                  | 4                        | 3.44                  | 3                        |
| 14041164  | 1.36                  | 1                        | 1.38                  | 1                        | 1.26                  | 1                        | 1.34                  | 1                        |
| 14041165  | 1.48                  | 1                        | 1.59                  | 2                        | 1.73                  | 2                        | 1.60                  | 2                        |
| 14041166  | 16.54                 | 17                       | 17.59                 | 18                       | 17.71                 | 18                       | 17.28                 | 17                       |

| Sample ID | Copy Number           |                          |                       |                          |                       |                          |                       |                          |
|-----------|-----------------------|--------------------------|-----------------------|--------------------------|-----------------------|--------------------------|-----------------------|--------------------------|
|           | r = 1                 |                          | r = 2                 |                          | r = 3                 |                          | Average               |                          |
|           | Ratio<br>(target/ref) | Estimated<br>Copy Number |
| 14041167  | 30.31                 | 30                       | 32.55                 | 33                       | 33.28                 | 33                       | 32.05                 | 32                       |
| 14041168  | 0.95                  | 1                        | 1.04                  | 1                        | 1.05                  | 1                        | 1.01                  | 1                        |
| 14041177  | 1.81                  | 2                        | 1.99                  | 2                        | 2.17                  | 2                        | 1.99                  | 2                        |
| 14041179  | 1.02                  | 1                        | 0.99                  | 1                        | 1.08                  | 1                        | 1.03                  | 1                        |
| 14041182  | 2.84                  | 3                        | 3.02                  | 3                        | 3.12                  | 3                        | 3.00                  | 3                        |
| 14041183  | 2.72                  | 3                        | 2.89                  | 3                        | 2.64                  | 3                        | 2.75                  | 3                        |
| 14041185  | 1.92                  | 2                        | 2.20                  | 2                        | 2.08                  | 2                        | 2.07                  | 2                        |
| 14041187  | 2.15                  | 2                        | 1.98                  | 2                        | 1.92                  | 2                        | 2.02                  | 2                        |
| 14041191  | 0.94                  | 1                        | 0.94                  | 1                        | 0.92                  | 1                        | 0.93                  | 1                        |
| 14041193  | 1.07                  | 1                        | 0.94                  | 1                        | 0.94                  | 1                        | 0.98                  | 1                        |
| 14041195  | 2.63                  | 3                        | 2.71                  | 3                        | 2.88                  | 3                        | 2.74                  | 3                        |
| 14041197  | 1.47                  | 1                        | 1.40                  | 1                        | 1.58                  | 2                        | 1.48                  | 1                        |
| 14041201  | 1.11                  | 1                        | 0.90                  | 1                        | 1.03                  | 1                        | 1.01                  | 1                        |
| 14041206  | 10.11                 | 10                       | 9.64                  | 10                       | 9.22                  | 9                        | 9.66                  | 10                       |
| 14041209  | 1.14                  | 1                        | 1.02                  | 1                        | 1.06                  | 1                        | 1.08                  | 1                        |
| 14041210  | 1.04                  | 1                        | 1.08                  | 1                        | 0.94                  | 1                        | 1.02                  | 1                        |
| 14041217  | 1.15                  | 1                        | 1.01                  | 1                        | 1.05                  | 1                        | 1.07                  | 1                        |
| 14041219  | 2.02                  | 2                        | 1.97                  | 2                        | 1.84                  | 2                        | 1.94                  | 2                        |
| 14041221  | 3.34                  | 3                        | 3.65                  | 4                        | 3.58                  | 4                        | 3.52                  | 4                        |

| Sample ID | Copy Number           |                          |                       |                          |                       |                          |                       |                          |
|-----------|-----------------------|--------------------------|-----------------------|--------------------------|-----------------------|--------------------------|-----------------------|--------------------------|
|           | r = 1                 |                          | r = 2                 |                          | r = 3                 |                          | Average               |                          |
|           | Ratio<br>(target/ref) | Estimated<br>Copy Number |
| 14041222  | 0.35                  | 0                        | 0.39                  | 0                        | 0.55                  | 1                        | 0.43                  | 0                        |
| 14041226  | 0.99                  | 1                        | 1.06                  | 1                        | 0.77                  | 1                        | 0.94                  | 1                        |
| 14041227  | 5.32                  | 5                        | 6.32                  | 6                        | 7.65                  | 8                        | 6.43                  | 6                        |
| 14041228  | 5.34                  | 5                        | 7.62                  | 8                        | 6.65                  | 7                        | 6.53                  | 7                        |
| 14041235  | 0.94                  | 1                        | 1.04                  | 1                        | 1.16                  | 1                        | 1.05                  | 1                        |
| 14041236  | 2.55                  | 3                        | 3.33                  | 3                        | 4.01                  | 4                        | 3.30                  | 3                        |
| 14041237  | 2.77                  | 3                        | 2.59                  | 3                        | 2.71                  | 3                        | 2.69                  | 3                        |
| 14041238  | 2.50                  | 2                        | 2.38                  | 2                        | 2.49                  | 2                        | 2.46                  | 2                        |
| 14041244  | 2.82                  | 3                        | 3.27                  | 3                        | 3.35                  | 3                        | 3.15                  | 3                        |
| 14041253  | 2.54                  | 3                        | 2.16                  | 2                        | 2.68                  | 3                        | 2.46                  | 2                        |
| 14041260  | 5.04                  | 5                        | 4.73                  | 5                        | 5.29                  | 5                        | 5.02                  | 5                        |
| 14041261  | 6.94                  | 7                        | 6.69                  | 7                        | 7.11                  | 7                        | 6.91                  | 7                        |
| 14041267  | 2.88                  | 3                        | 2.69                  | 3                        | 2.87                  | 3                        | 2.81                  | 3                        |
| 14041271  | 5.79                  | 6                        | 6.32                  | 6                        | 7.18                  | 7                        | 6.43                  | 6                        |
| 14041272  | 0.90                  | 1                        | 0.89                  | 1                        | 1.07                  | 1                        | 0.95                  | 1                        |
| 14041275  | 0.95                  | 1                        | 0.99                  | 1                        | 0.94                  | 1                        | 0.96                  | 1                        |
| 14041276  | 4.28                  | 4                        | 5.07                  | 5                        | 4.51                  | 5                        | 4.62                  | 5                        |
| 14041277  | 0.94                  | 1                        | 0.87                  | 1                        | 0.98                  | 1                        | 0.93                  | 1                        |
| 14041280  | 2.79                  | 3                        | 3.03                  | 3                        | 2.90                  | 3                        | 2.91                  | 3                        |

| Sample ID | Copy Number           |                          |                       |                          |                       |                          |                       |                          |
|-----------|-----------------------|--------------------------|-----------------------|--------------------------|-----------------------|--------------------------|-----------------------|--------------------------|
|           | r = 1                 |                          | r = 2                 |                          | r = 3                 |                          | Average               |                          |
|           | Ratio<br>(target/ref) | Estimated<br>Copy Number |
| 14041282  | 3.32                  | 3                        | 4.56                  | 5                        | 3.42                  | 3                        | 3.77                  | 4                        |
| 14041286  | 3.84                  | 4                        | 3.28                  | 3                        | 3.14                  | 3                        | 3.42                  | 3                        |
| 14041287  | 5.21                  | 5                        | 4.92                  | 5                        | 4.71                  | 5                        | 4.95                  | 5                        |
| 14041288  | 2.01                  | 2                        | 1.97                  | 2                        | 1.96                  | 2                        | 1.98                  | 2                        |
| 14041289  | 2.76                  | 3                        | 2.50                  | 3                        | 2.69                  | 3                        | 2.65                  | 3                        |
| 14041294  | 1.92                  | 2                        | 2.88                  | 3                        | 2.03                  | 2                        | 2.28                  | 2                        |
| 14041295  | 2.93                  | 3                        | 2.41                  | 2                        | 2.74                  | 3                        | 2.69                  | 3                        |
| 14041297  | 2.06                  | 2                        | 1.79                  | 2                        | 1.85                  | 2                        | 1.90                  | 2                        |
| 14041300  | 7.01                  | 7                        | 7.20                  | 7                        | 7.02                  | 7                        | 7.08                  | 7                        |
| 14041302  | 1.95                  | 2                        | 1.98                  | 2                        | 2.07                  | 2                        | 2.00                  | 2                        |
| 14041303  | 9.30                  | 9                        | 9.04                  | 9                        | 8.93                  | 9                        | 9.09                  | 9                        |
| 14041313  | 1.87                  | 2                        | 2.11                  | 2                        | 2.08                  | 2                        | 2.02                  | 2                        |
| 14041317  | 2.06                  | 2                        | 2.07                  | 2                        | 2.30                  | 2                        | 2.14                  | 2                        |
| 14041321  | 3.68                  | 4                        | 4.09                  | 4                        | 3.99                  | 4                        | 3.92                  | 4                        |
| 14041322  | 2.27                  | 2                        | 2.25                  | 2                        | 2.42                  | 2                        | 2.32                  | 2                        |
| 14041323  | 3.51                  | 4                        | 4.77                  | 5                        | 3.86                  | 4                        | 4.05                  | 4                        |
| 14041329  | 2.11                  | 2                        | 2.11                  | 2                        | 2.30                  | 2                        | 2.17                  | 2                        |
| 14041330  | 1.29                  | 1                        | 1.99                  | 2                        | 2.15                  | 2                        | 1.81                  | 2                        |
| 14041331  | 1.64                  | 2                        | 1.48                  | 1                        | 1.47                  | 1                        | 1.53                  | 2                        |

| Sample ID | Copy Number           |                          |                       |                          |                       |                          |                       |                          |
|-----------|-----------------------|--------------------------|-----------------------|--------------------------|-----------------------|--------------------------|-----------------------|--------------------------|
|           | r = 1                 |                          | r = 2                 |                          | r = 3                 |                          | Average               |                          |
|           | Ratio<br>(target/ref) | Estimated<br>Copy Number |
| 14041333  | 2.60                  | 3                        | 2.61                  | 3                        | 2.77                  | 3                        | 2.66                  | 3                        |
| 14041334  | 3.99                  | 4                        | 3.83                  | 4                        | 3.88                  | 4                        | 3.90                  | 4                        |
| 14041335  | 0.67                  | 1                        | 0.69                  | 1                        | 0.66                  | 1                        | 0.67                  | 1                        |
| 14041336  | 1.86                  | 2                        | 1.50                  | 2                        | 1.37                  | 1                        | 1.58                  | 2                        |
| 14041337  | 1.52                  | 2                        | 1.39                  | 1                        | 1.21                  | 1                        | 1.37                  | 1                        |
| 14041339  | 1.21                  | 1                        | 1.01                  | 1                        | 0.90                  | 1                        | 1.04                  | 1                        |
| 14041340  | 1.91                  | 2                        | 1.55                  | 2                        | 1.37                  | 1                        | 1.61                  | 2                        |
| 14041341  | 1.63                  | 2                        | 1.38                  | 1                        | 1.36                  | 1                        | 1.46                  | 1                        |
| 14041342  | 0.62                  | 1                        | 0.62                  | 1                        | 0.55                  | 1                        | 0.59                  | 1                        |
| 14041343  | 1.76                  | 2                        | 1.74                  | 2                        | 1.89                  | 2                        | 1.80                  | 2                        |
| 14041344  | 1.51                  | 2                        | 1.52                  | 2                        | 1.42                  | 1                        | 1.48                  | 1                        |
| 14041345  | 1.46                  | 1                        | 1.47                  | 1                        | 1.46                  | 1                        | 1.46                  | 1                        |
| 14041346  | 3.97                  | 4                        | 3.92                  | 4                        | 4.00                  | 4                        | 3.97                  | 4                        |
| 14041347  | 1.31                  | 1                        | 1.46                  | 1                        | 1.40                  | 1                        | 1.39                  | 1                        |
| 14041356  | 1.16                  | 1                        | 1.11                  | 1                        | 1.12                  | 1                        | 1.13                  | 1                        |
| 14041357  | 1.39                  | 1                        | 1.33                  | 1                        | 1.34                  | 1                        | 1.35                  | 1                        |
| 14041361  | 6.61                  | 7                        | 6.77                  | 7                        | 6.39                  | 6                        | 6.59                  | 7                        |
| 14041362  | 1.44                  | 1                        | 1.32                  | 1                        | 1.23                  | 1                        | 1.33                  | 1                        |
| 14041364  | 4.44                  | 4                        | 3.82                  | 4                        | 3.81                  | 4                        | 4.02                  | 4                        |

| Sample ID | Copy Number           |                          |                       |                          |                       |                          |                       |                          |
|-----------|-----------------------|--------------------------|-----------------------|--------------------------|-----------------------|--------------------------|-----------------------|--------------------------|
|           | r = 1                 |                          | r = 2                 |                          | r = 3                 |                          | Average               |                          |
|           | Ratio<br>(target/ref) | Estimated<br>Copy Number |
| 14041365  | 4.39                  | 4                        | 4.12                  | 4                        | 4.71                  | 5                        | 4.41                  | 4                        |
| 14041368  | 2.47                  | 2                        | 2.91                  | 3                        | 2.45                  | 2                        | 2.61                  | 3                        |
| 14041371  | 2.50                  | 2                        | 2.35                  | 2                        | 2.63                  | 3                        | 2.49                  | 2                        |
| 14041372  | 1.26                  | 1                        | 1.29                  | 1                        | 1.11                  | 1                        | 1.22                  | 1                        |
| 14041374  | 3.63                  | 4                        | 3.22                  | 3                        | 3.33                  | 3                        | 3.39                  | 3                        |
| 14041376  | 2.10                  | 2                        | 2.17                  | 2                        | 2.08                  | 2                        | 2.11                  | 2                        |
| 14041378  | 5.46                  | 5                        | 5.26                  | 5                        | 4.38                  | 4                        | 5.03                  | 5                        |
| 14041379  | 3.07                  | 3                        | 3.17                  | 3                        | 3.35                  | 3                        | 3.20                  | 3                        |
| 14041381  | 4.35                  | 4                        | 4.45                  | 4                        | 4.86                  | 5                        | 4.55                  | 5                        |
| 14041383  | 3.95                  | 4                        | 3.97                  | 4                        | 3.86                  | 4                        | 3.93                  | 4                        |
| 14041384  | 4.18                  | 4                        | 3.57                  | 4                        | 4.68                  | 5                        | 4.14                  | 4                        |
| 14041387  | 3.43                  | 3                        | 2.96                  | 3                        | 2.87                  | 3                        | 3.08                  | 3                        |
| 14041391  | 8.60                  | 9                        | 8.31                  | 8                        | 6.89                  | 7                        | 7.94                  | 8                        |
| 14041392  | 1.40                  | 1                        | 1.20                  | 1                        | 1.26                  | 1                        | 1.29                  | 1                        |
| 14041394  | 1.25                  | 1                        | 1.30                  | 1                        | 1.37                  | 1                        | 1.31                  | 1                        |
| 14041396  | 1.12                  | 1                        | 1.26                  | 1                        | 1.07                  | 1                        | 1.15                  | 1                        |
| 14041399  | 2.21                  | 2                        | 2.08                  | 2                        | 2.00                  | 2                        | 2.10                  | 2                        |
| 14041401  | 3.57                  | 4                        | 3.71                  | 4                        | 3.36                  | 3                        | 3.55                  | 4                        |
| 14041403  | 1.24                  | 1                        | 1.24                  | 1                        | 1.24                  | 1                        | 1.24                  | 1                        |

| Sample ID | Copy Number           |                          |                       |                          |                       |                          |                       |                          |
|-----------|-----------------------|--------------------------|-----------------------|--------------------------|-----------------------|--------------------------|-----------------------|--------------------------|
|           | r = 1                 |                          | r = 2                 |                          | r = 3                 |                          | Average               |                          |
|           | Ratio<br>(target/ref) | Estimated<br>Copy Number |
| 14041406  | 2.62                  | 3                        | 2.39                  | 2                        | 2.58                  | 3                        | 2.53                  | 3                        |
| 14041407  | 2.26                  | 2                        | 2.70                  | 3                        | 2.18                  | 2                        | 2.38                  | 2                        |
| 14041408  | 3.80                  | 4                        | 2.83                  | 3                        | 3.58                  | 4                        | 3.40                  | 3                        |
| 14041409  | 2.65                  | 3                        | 2.04                  | 2                        | 1.95                  | 2                        | 2.21                  | 2                        |
| 14041412  | 4.13                  | 4                        | 4.08                  | 4                        | 3.88                  | 4                        | 4.03                  | 4                        |
| 14041415  | 2.33                  | 2                        | 2.25                  | 2                        | 2.16                  | 2                        | 2.25                  | 2                        |
| 14041418  | 2.44                  | 2                        | 2.44                  | 2                        | 2.39                  | 2                        | 2.42                  | 2                        |
| 14041419  | 4.40                  | 4                        | 4.24                  | 4                        | 4.39                  | 4                        | 4.35                  | 4                        |
| 14041421  | 2.33                  | 2                        | 2.39                  | 2                        | 2.27                  | 2                        | 2.33                  | 2                        |
| 14041424  | 1.35                  | 1                        | 1.48                  | 1                        | 1.29                  | 1                        | 1.37                  | 1                        |
| 14041427  | 2.97                  | 3                        | 3.04                  | 3                        | 3.69                  | 4                        | 3.23                  | 3                        |
| 14041430  | 2.33                  | 2                        | 1.90                  | 2                        | 2.03                  | 2                        | 2.09                  | 2                        |
| 14041431  | 3.61                  | 4                        | 4.06                  | 4                        | 3.62                  | 4                        | 3.77                  | 4                        |
| 14041433  | 2.16                  | 2                        | 2.32                  | 2                        | 2.68                  | 3                        | 2.39                  | 2                        |
| 14041435  | 3.43                  | 3                        | 3.21                  | 3                        | 3.47                  | 3                        | 3.37                  | 3                        |
| 14041436  | 3.05                  | 3                        | 3.32                  | 3                        | 3.04                  | 3                        | 3.14                  | 3                        |
| 14041437  | 11.75                 | 12                       | 15.60                 | 16                       | 16.34                 | 16                       | 14.56                 | 15                       |
| 14041438  | 16.85                 | 17                       | 19.26                 | 19                       | 21.01                 | 21                       | 19.04                 | 19                       |
| 14041445  | 4.62                  | 5                        | 4.64                  | 5                        | 4.03                  | 4                        | 4.43                  | 4                        |

| Sample ID | Copy Number           |                          |                       |                          |                       |                          |                       |                          |
|-----------|-----------------------|--------------------------|-----------------------|--------------------------|-----------------------|--------------------------|-----------------------|--------------------------|
|           | r = 1                 |                          | r = 2                 |                          | r = 3                 |                          | Average               |                          |
|           | Ratio<br>(target/ref) | Estimated<br>Copy Number |
| 14041446  | 1.84                  | 2                        | 1.87                  | 2                        | 1.95                  | 2                        | 1.89                  | 2                        |
| 14041449  | 2.47                  | 2                        | 2.82                  | 3                        | 3.09                  | 3                        | 2.79                  | 3                        |
| 14041450  | 1.74                  | 2                        | 1.99                  | 2                        | 2.07                  | 2                        | 1.93                  | 2                        |
| 14041455  | 1.43                  | 1                        | 0.61                  | 1                        | 1.51                  | 2                        | 1.19                  | 1                        |
| 14041460  | 4.41                  | 4                        | 4.51                  | 5                        | 4.48                  | 4                        | 4.47                  | 4                        |
| 14041464  | 8.86                  | 9                        | 7.86                  | 8                        | 7.97                  | 8                        | 8.23                  | 8                        |
| 14041466  | 1.49                  | 1                        | 1.23                  | 1                        | 1.31                  | 1                        | 1.34                  | 1                        |
| 14041467  | 1.57                  | 2                        | 1.33                  | 1                        | 1.27                  | 1                        | 1.39                  | 1                        |
| 14041468  | 1.56                  | 2                        | 1.41                  | 1                        | 1.45                  | 1                        | 1.47                  | 1                        |
| 14041470  | 1.23                  | 1                        | 1.24                  | 1                        | 1.20                  | 1                        | 1.22                  | 1                        |
| 14041478  | 4.11                  | 4                        | 4.54                  | 5                        | 4.85                  | 5                        | 4.50                  | 4                        |
| 14041479  | 2.41                  | 2                        | 2.42                  | 2                        | 2.39                  | 2                        | 2.41                  | 2                        |
| 14041481  | 2.27                  | 2                        | 2.33                  | 2                        | 2.13                  | 2                        | 2.24                  | 2                        |
| 14041483  | 2.14                  | 2                        | 2.13                  | 2                        | 2.25                  | 2                        | 2.17                  | 2                        |
| 14041485  | 1.27                  | 1                        | 1.25                  | 1                        | 1.14                  | 1                        | 1.22                  | 1                        |
| 14041494  | 2.36                  | 2                        | 2.88                  | 3                        | 2.21                  | 2                        | 2.48                  | 2                        |
| 14041495  | 1.97                  | 2                        | 2.05                  | 2                        | 2.08                  | 2                        | 2.03                  | 2                        |
| 14041496  | 1.44                  | 1                        | 1.53                  | 2                        | 1.31                  | 1                        | 1.43                  | 1                        |
| 14041502  | 2.15                  | 2                        | 2.09                  | 2                        | 2.32                  | 2                        | 2.19                  | 2                        |



| Sample ID | Copy Number           |                          |                       |                          |                       |                          |                       |                          |
|-----------|-----------------------|--------------------------|-----------------------|--------------------------|-----------------------|--------------------------|-----------------------|--------------------------|
|           | r = 1                 |                          | r = 2                 |                          | r = 3                 |                          | Average               |                          |
|           | Ratio<br>(target/ref) | Estimated<br>Copy Number |
| 14041507  | 2.94                  | 3                        | 3.20                  | 3                        | 3.27                  | 3                        | 3.14                  | 3                        |
| 14041512  | 1.22                  | 1                        | 1.22                  | 1                        | 1.26                  | 1                        | 1.23                  | 1                        |
| 14041514  | 2.66                  | 3                        | 2.35                  | 2                        | 2.15                  | 2                        | 2.39                  | 2                        |
| 14041515  | 2.50                  | 2                        | 2.27                  | 2                        | 2.44                  | 2                        | 2.40                  | 2                        |
| 14041518  | 2.27                  | 2                        | 2.44                  | 2                        | 2.52                  | 3                        | 2.41                  | 2                        |
| 14041524  | 3.46                  | 3                        | 3.43                  | 3                        | 3.63                  | 4                        | 3.51                  | 4                        |
| 14041528  | 1.36                  | 1                        | 1.51                  | 2                        | 1.53                  | 2                        | 1.47                  | 1                        |
| 14041529  | 1.13                  | 1                        | 1.24                  | 1                        | 1.07                  | 1                        | 1.15                  | 1                        |
| 14041531  | 0.36                  | 0                        | 0.33                  | 0                        | 0.31                  | 0                        | 0.33                  | 0                        |
| 14041540  | 3.17                  | 3                        | 3.26                  | 3                        | 3.25                  | 3                        | 3.23                  | 3                        |
| 14041541  | 4.82                  | 5                        | 4.51                  | 5                        | 4.44                  | 4                        | 4.59                  | 5                        |
| 14041542  | 3.34                  | 3                        | 3.07                  | 3                        | 3.36                  | 3                        | 3.26                  | 3                        |
| 14041543  | 3.41                  | 3                        | 3.14                  | 3                        | 3.58                  | 4                        | 3.38                  | 3                        |
| 14041550  | 1.96                  | 2                        | 2.56                  | 3                        | 2.23                  | 2                        | 2.25                  | 2                        |
| 14041551  | 2.28                  | 2                        | 2.48                  | 2                        | 2.31                  | 2                        | 2.36                  | 2                        |
| 14041552  | 2.59                  | 3                        | 2.55                  | 3                        | 2.46                  | 2                        | 2.53                  | 3                        |
| 14041555  | 1.28                  | 1                        | 1.34                  | 1                        | 1.29                  | 1                        | 1.30                  | 1                        |
| 14041561  | 1.24                  | 1                        | 1.08                  | 1                        | 1.14                  | 1                        | 1.15                  | 1                        |
| 14041563  | 3.07                  | 3                        | 3.07                  | 3                        | 3.40                  | 3                        | 3.18                  | 3                        |

| Sample ID | Copy Number           |                          |                       |                          |                       |                          |                       |                          |
|-----------|-----------------------|--------------------------|-----------------------|--------------------------|-----------------------|--------------------------|-----------------------|--------------------------|
|           | r = 1                 |                          | r = 2                 |                          | r = 3                 |                          | Average               |                          |
|           | Ratio<br>(target/ref) | Estimated<br>Copy Number |
| 14041567  | 1.69                  | 2                        | 1.54                  | 2                        | 1.59                  | 2                        | 1.61                  | 2                        |
| 14041568  | 3.19                  | 3                        | 3.14                  | 3                        | 2.59                  | 3                        | 2.97                  | 3                        |
| 14041577  | 2.20                  | 2                        | 2.20                  | 2                        | 2.02                  | 2                        | 2.14                  | 2                        |
| 14041580  | 1.42                  | 1                        | 1.45                  | 1                        | 1.44                  | 1                        | 1.43                  | 1                        |
| 14041581  | 1.21                  | 1                        | 1.23                  | 1                        | 1.29                  | 1                        | 1.24                  | 1                        |
| 14041582  | 1.39                  | 1                        | 1.37                  | 1                        | 1.42                  | 1                        | 1.39                  | 1                        |
| 14041587  | 3.46                  | 3                        | 3.40                  | 3                        | 3.46                  | 3                        | 3.44                  | 3                        |
| 14041588  | 2.46                  | 2                        | 2.50                  | 3                        | 2.32                  | 2                        | 2.43                  | 2                        |
| 14041593  | 1.27                  | 1                        | 1.40                  | 1                        | 1.16                  | 1                        | 1.28                  | 1                        |
| 14041594  | 3.19                  | 3                        | 3.16                  | 3                        | 3.01                  | 3                        | 3.12                  | 3                        |
| 14041596  | 2.37                  | 2                        | 2.50                  | 3                        | 2.29                  | 2                        | 2.39                  | 2                        |
| 14041611  | 3.19                  | 3                        | 2.82                  | 3                        | 3.28                  | 3                        | 3.10                  | 3                        |
| 14041630  | 1.23                  | 1                        | 1.17                  | 1                        | 1.30                  | 1                        | 1.23                  | 1                        |
| 14041643  | 1.44                  | 1                        | 1.54                  | 2                        | 1.56                  | 2                        | 1.51                  | 2                        |
| 14041653  | 4.07                  | 4                        | 4.17                  | 4                        | 3.85                  | 4                        | 4.03                  | 4                        |
| 14041659  | 3.11                  | 3                        | 2.88                  | 3                        | 2.96                  | 3                        | 2.98                  | 3                        |
| 14041660  | 2.52                  | 3                        | 2.40                  | 2                        | 2.08                  | 2                        | 2.33                  | 2                        |
| 14041663  | 3.68                  | 4                        | 3.45                  | 3                        | 3.33                  | 3                        | 3.49                  | 3                        |
| 14041664  | 1.02                  | 1                        | 1.04                  | 1                        | 0.99                  | 1                        | 1.02                  | 1                        |

| Sample ID | Copy Number           |                          |                       |                          |                       |                          |                       |                          |
|-----------|-----------------------|--------------------------|-----------------------|--------------------------|-----------------------|--------------------------|-----------------------|--------------------------|
|           | r = 1                 |                          | r = 2                 |                          | r = 3                 |                          | Average               |                          |
|           | Ratio<br>(target/ref) | Estimated<br>Copy Number |
| 14041676  | 3.27                  | 3                        | 2.88                  | 3                        | 3.23                  | 3                        | 3.13                  | 3                        |
| 14041679  | 7.04                  | 7                        | 5.30                  | 5                        | 6.56                  | 7                        | 6.30                  | 6                        |
| 14041688  | 2.36                  | 2                        | 2.19                  | 2                        | 2.20                  | 2                        | 2.25                  | 2                        |
| 14041690  | 3.15                  | 3                        | 3.08                  | 3                        | 2.88                  | 3                        | 3.04                  | 3                        |
| 14041691  | 9.20                  | 9                        | 8.34                  | 8                        | 7.44                  | 7                        | 8.33                  | 8                        |
| 14041692  | 9.72                  | 10                       | 8.68                  | 9                        | 8.21                  | 8                        | 8.87                  | 9                        |
| 14041693  | 9.95                  | 10                       | 9.37                  | 9                        | 9.82                  | 10                       | 9.71                  | 10                       |
| 14041694  | 1.16                  | 1                        | 1.09                  | 1                        | 1.18                  | 1                        | 1.14                  | 1                        |
| 14041698  | 2.55                  | 3                        | 2.45                  | 2                        | 2.50                  | 3                        | 2.50                  | 2                        |
| 14041699  | 0.68                  | 1                        | 0.63                  | 1                        | 0.66                  | 1                        | 0.66                  | 1                        |
| 14041701  | 1.18                  | 1                        | 1.12                  | 1                        | 1.16                  | 1                        | 1.16                  | 1                        |
| 14041703  | 1.06                  | 1                        | 1.13                  | 1                        | 1.08                  | 1                        | 1.09                  | 1                        |
| 14041704  | 2.11                  | 2                        | 2.20                  | 2                        | 2.03                  | 2                        | 2.11                  | 2                        |
| 14041705  | 2.98                  | 3                        | 3.02                  | 3                        | 2.87                  | 3                        | 2.96                  | 3                        |
| 14041706  | 2.69                  | 3                        | 2.57                  | 3                        | 2.10                  | 2                        | 2.45                  | 2                        |
| 14041711  | 1.34                  | 1                        | 1.30                  | 1                        | 1.30                  | 1                        | 1.31                  | 1                        |
| 14041712  | 2.33                  | 2                        | 2.16                  | 2                        | 2.15                  | 2                        | 2.22                  | 2                        |
| 14041715  | 8.97                  | 9                        | 8.73                  | 9                        | 8.48                  | 8                        | 8.73                  | 9                        |
| 14041716  | 9.71                  | 10                       | 9.75                  | 10                       | 9.99                  | 10                       | 9.82                  | 10                       |

| Sample ID | Copy Number           |                          |                       |                          |                       |                          |                       |                          |
|-----------|-----------------------|--------------------------|-----------------------|--------------------------|-----------------------|--------------------------|-----------------------|--------------------------|
|           | r = 1                 |                          | r = 2                 |                          | r = 3                 |                          | Average               |                          |
|           | Ratio<br>(target/ref) | Estimated<br>Copy Number |
| 14041721  | 3.66                  | 4                        | 4.66                  | 5                        | 4.74                  | 5                        | 4.35                  | 4                        |
| 14041722  | 4.50                  | 5                        | 4.27                  | 4                        | 4.26                  | 4                        | 4.34                  | 4                        |
| 14041726  | 5.85                  | 6                        | 6.85                  | 7                        | 6.28                  | 6                        | 6.32                  | 6                        |
| 14041727  | 5.73                  | 6                        | 5.44                  | 5                        | 4.48                  | 4                        | 5.22                  | 5                        |
| 14041731  | 0.73                  | 1                        | 0.77                  | 1                        | 0.83                  | 1                        | 0.78                  | 1                        |
| 14041734  | 2.39                  | 2                        | 1.96                  | 2                        | 2.07                  | 2                        | 2.14                  | 2                        |
| 14041740  | 1.20                  | 1                        | 1.17                  | 1                        | 1.27                  | 1                        | 1.22                  | 1                        |
| 14041741  | 2.15                  | 2                        | 2.44                  | 2                        | 2.37                  | 2                        | 2.32                  | 2                        |
| 14041746  | 9.46                  | 9                        | 8.84                  | 9                        | 9.85                  | 10                       | 9.38                  | 9                        |
| 14041747  | 10.80                 | 11                       | 10.90                 | 11                       | 10.49                 | 10                       | 10.73                 | 11                       |
| 14041754  | 1.25                  | 1                        | 1.19                  | 1                        | 1.20                  | 1                        | 1.21                  | 1                        |
| 14041760  | 1.35                  | 1                        | 1.30                  | 1                        | 0.90                  | 1                        | 1.18                  | 1                        |
| 14041762  | 1.27                  | 1                        | 1.21                  | 1                        | 1.33                  | 1                        | 1.27                  | 1                        |
| 14041763  | 2.33                  | 2                        | 2.61                  | 3                        | 2.48                  | 2                        | 2.47                  | 2                        |
| 14041764  | 1.42                  | 1                        | 1.45                  | 1                        | 1.33                  | 1                        | 1.40                  | 1                        |
| 14041766  | 8.53                  | 9                        | 10.26                 | 10                       | 8.61                  | 9                        | 9.13                  | 9                        |
| 14041769  | 2.20                  | 2                        | 2.07                  | 2                        | 1.92                  | 2                        | 2.06                  | 2                        |
| 14041770  | 1.26                  | 1                        | 1.28                  | 1                        | 1.21                  | 1                        | 1.25                  | 1                        |
| 14041772  | 2.71                  | 3                        | 2.49                  | 2                        | 2.50                  | 2                        | 2.57                  | 3                        |

| Sample ID | Copy Number           |                          |                       |                          |                       |                          |                       |                          |
|-----------|-----------------------|--------------------------|-----------------------|--------------------------|-----------------------|--------------------------|-----------------------|--------------------------|
|           | r = 1                 |                          | r = 2                 |                          | r = 3                 |                          | Average               |                          |
|           | Ratio<br>(target/ref) | Estimated<br>Copy Number |
| 14041773  | 2.36                  | 2                        | 2.40                  | 2                        | 2.53                  | 3                        | 2.43                  | 2                        |
| 14041777  | 1.63                  | 2                        | 1.77                  | 2                        | 1.57                  | 2                        | 1.66                  | 2                        |
| 14041779  | 1.20                  | 1                        | 1.26                  | 1                        | 1.25                  | 1                        | 1.23                  | 1                        |
| 14041781  | 4.09                  | 4                        | 4.05                  | 4                        | 3.56                  | 4                        | 3.90                  | 4                        |
| 14041785  | 1.48                  | 1                        | 1.15                  | 1                        | 1.56                  | 2                        | 1.40                  | 1                        |
| 14041789  | 1.29                  | 1                        | 1.33                  | 1                        | 1.18                  | 1                        | 1.27                  | 1                        |
| 14041790  | 0.95                  | 1                        | 1.37                  | 1                        | 1.24                  | 1                        | 1.19                  | 1                        |
| 14041792  | 1.35                  | 1                        | 1.30                  | 1                        | 1.32                  | 1                        | 1.32                  | 1                        |
| 14041795  | 1.87                  | 2                        | 2.42                  | 2                        | 2.25                  | 2                        | 2.18                  | 2                        |
| 14041799  | 1.16                  | 1                        | 1.40                  | 1                        | 2.11                  | 2                        | 1.56                  | 2                        |
| 14041800  | 1.21                  | 1                        | 1.29                  | 1                        | 1.46                  | 1                        | 1.32                  | 1                        |
| 14041801  | 2.14                  | 2                        | 0.52                  | 1                        | 2.16                  | 2                        | 1.60                  | 2                        |
| 14041803  | 1.19                  | 1                        | 1.15                  | 1                        | 1.15                  | 1                        | 1.16                  | 1                        |
| 14041804  | 1.27                  | 1                        | 1.46                  | 1                        | 1.50                  | 1                        | 1.41                  | 1                        |
| 14041805  | 1.38                  | 1                        | 1.34                  | 1                        | 1.30                  | 1                        | 1.34                  | 1                        |
| 14041810  | 8.90                  | 9                        | 10.78                 | 11                       | 6.74                  | 7                        | 8.81                  | 9                        |
| 14041815  | 6.03                  | 6                        | 6.92                  | 7                        | 8.31                  | 8                        | 7.09                  | 7                        |
| 14041819  | 1.35                  | 1                        | 1.26                  | 1                        | 0.95                  | 1                        | 1.19                  | 1                        |
| 14041821  | 0.92                  | 1                        | 1.91                  | 2                        | 1.68                  | 2                        | 1.50                  | 2                        |

| Sample ID | Copy Number           |                          |                       |                          |                       |                          |                       |                          |
|-----------|-----------------------|--------------------------|-----------------------|--------------------------|-----------------------|--------------------------|-----------------------|--------------------------|
|           | r = 1                 |                          | r = 2                 |                          | r = 3                 |                          | Average               |                          |
|           | Ratio<br>(target/ref) | Estimated<br>Copy Number |
| 14041823  | 1.21                  | 1                        | 1.31                  | 1                        | 1.20                  | 1                        | 1.24                  | 1                        |
| 14041824  | 1.41                  | 1                        | 1.18                  | 1                        | 1.22                  | 1                        | 1.27                  | 1                        |
| 14041826  | 2.07                  | 2                        | 2.31                  | 2                        | 1.90                  | 2                        | 2.10                  | 2                        |
| 14041827  | 1.12                  | 1                        | 1.28                  | 1                        | 1.28                  | 1                        | 1.23                  | 1                        |
| 14041828  | 1.23                  | 1                        | 1.39                  | 1                        | 1.54                  | 2                        | 1.39                  | 1                        |
| 14041834  | 10.73                 | 11                       | 11.74                 | 12                       | 12.01                 | 12                       | 11.49                 | 11                       |
| 14041835  | 6.64                  | 7                        | 6.73                  | 7                        | 7.09                  | 7                        | 6.82                  | 7                        |
| 14041836  | 6.06                  | 6                        | 5.69                  | 6                        | 5.41                  | 5                        | 5.72                  | 6                        |
| 14041837  | 1.95                  | 2                        | 2.01                  | 2                        | 1.93                  | 2                        | 1.96                  | 2                        |
| 14041838  | 3.42                  | 3                        | 3.42                  | 3                        | 3.27                  | 3                        | 3.37                  | 3                        |
| 14041839  | 5.43                  | 5                        | 4.86                  | 5                        | 4.66                  | 5                        | 4.98                  | 5                        |
| 14041841  | 6.52                  | 7                        | 6.34                  | 6                        | 6.37                  | 6                        | 6.41                  | 6                        |
| 14041842  | 4.11                  | 4                        | 4.08                  | 4                        | 3.86                  | 4                        | 4.01                  | 4                        |
| 14041845  | 1.21                  | 1                        | 1.34                  | 1                        | 1.22                  | 1                        | 1.25                  | 1                        |
| 14041850  | 1.27                  | 1                        | 1.30                  | 1                        | 1.16                  | 1                        | 1.24                  | 1                        |
| 14041851  | 5.09                  | 5                        | 4.97                  | 5                        | 4.69                  | 5                        | 4.92                  | 5                        |
| 14041852  | 1.32                  | 1                        | 1.15                  | 1                        | 1.20                  | 1                        | 1.22                  | 1                        |
| 14041854  | 3.98                  | 4                        | 4.27                  | 4                        | 4.57                  | 5                        | 4.28                  | 4                        |
| 14041855  | 4.80                  | 5                        | 4.58                  | 5                        | 4.45                  | 4                        | 4.61                  | 5                        |

| Sample ID | Copy Number           |                          |                       |                          |                       |                          |                       |                          |
|-----------|-----------------------|--------------------------|-----------------------|--------------------------|-----------------------|--------------------------|-----------------------|--------------------------|
|           | r = 1                 |                          | r = 2                 |                          | r = 3                 |                          | Average               |                          |
|           | Ratio<br>(target/ref) | Estimated<br>Copy Number |
| 14041856  | 4.68                  | 5                        | 4.53                  | 5                        | 4.55                  | 5                        | 4.59                  | 5                        |
| 14041865  | 1.29                  | 1                        | 1.48                  | 1                        | 1.44                  | 1                        | 1.40                  | 1                        |
| 14041867  | 2.65                  | 3                        | 2.62                  | 3                        | 2.63                  | 3                        | 2.63                  | 3                        |
| 14041868  | 2.42                  | 2                        | 2.42                  | 2                        | 2.39                  | 2                        | 2.41                  | 2                        |
| 14041869  | 1.57                  | 2                        | 1.52                  | 2                        | 1.66                  | 2                        | 1.58                  | 2                        |
| 14041872  | 2.91                  | 3                        | 3.32                  | 3                        | 3.65                  | 4                        | 3.30                  | 3                        |
| 14041873  | 2.42                  | 2                        | 2.46                  | 2                        | 2.61                  | 3                        | 2.50                  | 2                        |
| 14041881  | 1.20                  | 1                        | 1.26                  | 1                        | 1.40                  | 1                        | 1.29                  | 1                        |
| 14041883  | 2.19                  | 2                        | 2.32                  | 2                        | 2.44                  | 2                        | 2.32                  | 2                        |
| 14041886  | 5.90                  | 6                        | 5.56                  | 6                        | 5.71                  | 6                        | 5.72                  | 6                        |
| 14041889  | 1.52                  | 2                        | 1.36                  | 1                        | 1.25                  | 1                        | 1.38                  | 1                        |
| 14041891  | 2.26                  | 2                        | 2.29                  | 2                        | 2.17                  | 2                        | 2.24                  | 2                        |
| 14041894  | 1.29                  | 1                        | 1.29                  | 1                        | 1.14                  | 1                        | 1.24                  | 1                        |
| 14041895  | 10.08                 | 10                       | 9.10                  | 9                        | 9.21                  | 9                        | 9.47                  | 9                        |
| 14041899  | 1.22                  | 1                        | 1.34                  | 1                        | 1.19                  | 1                        | 1.25                  | 1                        |
| 14041905  | 1.24                  | 1                        | 1.18                  | 1                        | 1.22                  | 1                        | 1.21                  | 1                        |
| 14041907  | 2.73                  | 3                        | 2.67                  | 3                        | 2.73                  | 3                        | 2.71                  | 3                        |
| 14041915  | 1.26                  | 1                        | 1.23                  | 1                        | 1.25                  | 1                        | 1.25                  | 1                        |
| 14041916  | 1.33                  | 1                        | 1.18                  | 1                        | 1.25                  | 1                        | 1.25                  | 1                        |

| Sample ID | Copy Number           |                          |                       |                          |                       |                          |                       |                          |
|-----------|-----------------------|--------------------------|-----------------------|--------------------------|-----------------------|--------------------------|-----------------------|--------------------------|
|           | r = 1                 |                          | r = 2                 |                          | r = 3                 |                          | Average               |                          |
|           | Ratio<br>(target/ref) | Estimated<br>Copy Number |
| 14041917  | 2.69                  | 3                        | 2.60                  | 3                        | 2.49                  | 2                        | 2.59                  | 3                        |
| 14041918  | 2.17                  | 2                        | 1.96                  | 2                        | 2.12                  | 2                        | 2.08                  | 2                        |
| 14041930  | 4.43                  | 4                        | 4.39                  | 4                        | 4.27                  | 4                        | 4.36                  | 4                        |
| 14041933  | 0.68                  | 1                        | 0.67                  | 1                        | 0.68                  | 1                        | 0.68                  | 1                        |
| 14041938  | 3.45                  | 3                        | 3.60                  | 4                        | 3.57                  | 4                        | 3.54                  | 4                        |
| 14041941  | 11.90                 | 12                       | 13.41                 | 13                       | 12.45                 | 12                       | 12.59                 | 13                       |
| 14041942  | 2.26                  | 2                        | 1.74                  | 2                        | 2.59                  | 3                        | 2.19                  | 2                        |
| 14041943  | 1.99                  | 2                        | 1.97                  | 2                        | 2.03                  | 2                        | 2.00                  | 2                        |
| 14041949  | 1.13                  | 1                        | 1.13                  | 1                        | 1.14                  | 1                        | 1.13                  | 1                        |
| 14041950  | 1.51                  | 2                        | 1.30                  | 1                        | 1.31                  | 1                        | 1.37                  | 1                        |
| 14041953  | 2.76                  | 3                        | 3.01                  | 3                        | 2.63                  | 3                        | 2.80                  | 3                        |
| 14041963  | 3.11                  | 3                        | 3.00                  | 3                        | 3.02                  | 3                        | 3.04                  | 3                        |
| 14041965  | 1.19                  | 1                        | 1.35                  | 1                        | 1.22                  | 1                        | 1.26                  | 1                        |
| 14041968  | 7.31                  | 7                        | 7.84                  | 8                        | 7.41                  | 7                        | 7.52                  | 8                        |
| 14041969  | 1.28                  | 1                        | 1.16                  | 1                        | 1.23                  | 1                        | 1.22                  | 1                        |
| 14041970  | 1.04                  | 1                        | 1.14                  | 1                        | 1.27                  | 1                        | 1.15                  | 1                        |
| 14041972  | 1.23                  | 1                        | 1.23                  | 1                        | 1.20                  | 1                        | 1.22                  | 1                        |
| 14041973  | 1.41                  | 1                        | 1.48                  | 1                        | 1.63                  | 2                        | 1.51                  | 2                        |
| 14041974  | 1.34                  | 1                        | 1.56                  | 2                        | 1.54                  | 2                        | 1.48                  | 1                        |



| Sample ID | Copy Number           |                          |                       |                          |                       |                          |                       |                          |
|-----------|-----------------------|--------------------------|-----------------------|--------------------------|-----------------------|--------------------------|-----------------------|--------------------------|
|           | r = 1                 |                          | r = 2                 |                          | r = 3                 |                          | Average               |                          |
|           | Ratio<br>(target/ref) | Estimated<br>Copy Number |
| 14041978  | 3.16                  | 3                        | 3.20                  | 3                        | 3.37                  | 3                        | 3.24                  | 3                        |
| 14041980  | 2.05                  | 2                        | 2.23                  | 2                        | 2.34                  | 2                        | 2.21                  | 2                        |
| 14041981  | 2.06                  | 2                        | 2.17                  | 2                        | 2.45                  | 2                        | 2.23                  | 2                        |
| 14041982  | 2.25                  | 2                        | 1.89                  | 2                        | 2.45                  | 2                        | 2.20                  | 2                        |
| 14041983  | 2.13                  | 2                        | 2.30                  | 2                        | 2.12                  | 2                        | 2.18                  | 2                        |
| 14041985  | 1.17                  | 1                        | 1.17                  | 1                        | 1.10                  | 1                        | 1.15                  | 1                        |
| 14041987  | 1.41                  | 1                        | 1.32                  | 1                        | 1.26                  | 1                        | 1.33                  | 1                        |
| 14041989  | 1.29                  | 1                        | 1.29                  | 1                        | 1.40                  | 1                        | 1.32                  | 1                        |
| 14041993  | 1.15                  | 1                        | 1.14                  | 1                        | 1.11                  | 1                        | 1.13                  | 1                        |
| 14041994  | 1.25                  | 1                        | 1.15                  | 1                        | 1.20                  | 1                        | 1.20                  | 1                        |
| 14041995  | 1.25                  | 1                        | 1.49                  | 1                        | 1.50                  | 1                        | 1.41                  | 1                        |
| 14041996  | 1.36                  | 1                        | 1.39                  | 1                        | 1.43                  | 1                        | 1.39                  | 1                        |
| 14041997  | 1.27                  | 1                        | 1.31                  | 1                        | 1.41                  | 1                        | 1.33                  | 1                        |
| 14041998  | 11.06                 | 11                       | 10.71                 | 11                       | 11.05                 | 11                       | 10.94                 | 11                       |
| 14042003  | 4.45                  | 4                        | 4.19                  | 4                        | 4.13                  | 4                        | 4.26                  | 4                        |
| 14042004  | 1.30                  | 1                        | 1.32                  | 1                        | 1.21                  | 1                        | 1.28                  | 1                        |
| 14042005  | 5.06                  | 5                        | 3.74                  | 4                        | 4.16                  | 4                        | 4.32                  | 4                        |
| 14042007  | 3.10                  | 3                        | 2.79                  | 3                        | 2.75                  | 3                        | 2.88                  | 3                        |
| 14042008  | 2.96                  | 3                        | 2.95                  | 3                        | 3.04                  | 3                        | 2.98                  | 3                        |

| Sample ID | Copy Number           |                          |                       |                          |                       |                          |                       |                          |
|-----------|-----------------------|--------------------------|-----------------------|--------------------------|-----------------------|--------------------------|-----------------------|--------------------------|
|           | r = 1                 |                          | r = 2                 |                          | r = 3                 |                          | Average               |                          |
|           | Ratio<br>(target/ref) | Estimated<br>Copy Number |
| 14042010  | 4.02                  | 4                        | 4.29                  | 4                        | 4.60                  | 5                        | 4.31                  | 4                        |
| 14042013  | 1.34                  | 1                        | 1.30                  | 1                        | 1.19                  | 1                        | 1.28                  | 1                        |
| 14042014  | 2.67                  | 3                        | 2.85                  | 3                        | 2.80                  | 3                        | 2.77                  | 3                        |
| 14042016  | 3.01                  | 3                        | 2.94                  | 3                        | 2.70                  | 3                        | 2.88                  | 3                        |
| 14042018  | 11.90                 | 12                       | 10.19                 | 10                       | 10.56                 | 11                       | 10.88                 | 11                       |
| 14042019  | 1.36                  | 1                        | 1.24                  | 1                        | 1.23                  | 1                        | 1.28                  | 1                        |
| 14042020  | 1.41                  | 1                        | 1.40                  | 1                        | 1.20                  | 1                        | 1.34                  | 1                        |
| 14042027  | 8.06                  | 8                        | 7.73                  | 8                        | 8.20                  | 8                        | 8.00                  | 8                        |
| 14042028  | 3.95                  | 4                        | 4.57                  | 5                        | 5.01                  | 5                        | 4.51                  | 5                        |
| 14042029  | 0.75                  | 1                        | 0.76                  | 1                        | 0.81                  | 1                        | 0.77                  | 1                        |
| 14042032  | 1.22                  | 1                        | 1.19                  | 1                        | 1.16                  | 1                        | 1.19                  | 1                        |
| 14042034  | 1.21                  | 1                        | 1.30                  | 1                        | 1.33                  | 1                        | 1.28                  | 1                        |
| 14042039  | 1.23                  | 1                        | 1.25                  | 1                        | 1.31                  | 1                        | 1.26                  | 1                        |
| 14042040  | 1.42                  | 1                        | 1.38                  | 1                        | 1.53                  | 2                        | 1.44                  | 1                        |
| 14042046  | 1.14                  | 1                        | 1.17                  | 1                        | 1.02                  | 1                        | 1.11                  | 1                        |
| 14042048  | 1.04                  | 1                        | 1.22                  | 1                        | 1.32                  | 1                        | 1.20                  | 1                        |
| 14042049  | 1.29                  | 1                        | 1.33                  | 1                        | 1.13                  | 1                        | 1.25                  | 1                        |
| 14042050  | 1.27                  | 1                        | 1.20                  | 1                        | 1.20                  | 1                        | 1.22                  | 1                        |
| 14042061  | 5.32                  | 5                        | 5.80                  | 6                        | 5.48                  | 5                        | 5.54                  | 6                        |

| Sample ID | Copy Number           |                          |                       |                          |                       |                          |                       |                          |
|-----------|-----------------------|--------------------------|-----------------------|--------------------------|-----------------------|--------------------------|-----------------------|--------------------------|
|           | r = 1                 |                          | r = 2                 |                          | r = 3                 |                          | Average               |                          |
|           | Ratio<br>(target/ref) | Estimated<br>Copy Number |
| 14042062  | 1.11                  | 1                        | 1.08                  | 1                        | 1.03                  | 1                        | 1.08                  | 1                        |
| 14042063  | 14.08                 | 14                       | 15.05                 | 15                       | 14.55                 | 15                       | 14.56                 | 15                       |
| 14042067  | 2.27                  | 2                        | 2.19                  | 2                        | 2.35                  | 2                        | 2.27                  | 2                        |
| 14042068  | 4.03                  | 4                        | 4.11                  | 4                        | 4.72                  | 5                        | 4.29                  | 4                        |
| 14042070  | 0.22                  | 0                        | 0.19                  | 0                        | 0.17                  | 0                        | 0.19                  | 0                        |
| 14042071  | 2.33                  | 2                        | 2.05                  | 2                        | 2.11                  | 2                        | 2.16                  | 2                        |
| 14042073  | 1.22                  | 1                        | 1.11                  | 1                        | 1.31                  | 1                        | 1.22                  | 1                        |
| 14042074  | 1.44                  | 1                        | 1.44                  | 1                        | 1.44                  | 1                        | 1.44                  | 1                        |
| 14042077  | 9.07                  | 9                        | 8.87                  | 9                        | 9.44                  | 9                        | 9.13                  | 9                        |
| 14042078  | 2.16                  | 2                        | 2.17                  | 2                        | 1.94                  | 2                        | 2.09                  | 2                        |
| 14042079  | 2.20                  | 2                        | 1.96                  | 2                        | 2.23                  | 2                        | 2.13                  | 2                        |
| 14042082  | 1.20                  | 1                        | 1.25                  | 1                        | 1.10                  | 1                        | 1.18                  | 1                        |
| 14042083  | 4.05                  | 4                        | 4.03                  | 4                        | 4.05                  | 4                        | 4.04                  | 4                        |
| 14042086  | 1.17                  | 1                        | 1.05                  | 1                        | 1.06                  | 1                        | 1.09                  | 1                        |
| 14042087  | 1.09                  | 1                        | 1.07                  | 1                        | 0.78                  | 1                        | 0.98                  | 1                        |
| 14042088  | 1.17                  | 1                        | 1.20                  | 1                        | 1.17                  | 1                        | 1.18                  | 1                        |
| 14042090  | 1.17                  | 1                        | 1.13                  | 1                        | 1.23                  | 1                        | 1.18                  | 1                        |
| 14042091  | 2.23                  | 2                        | 2.24                  | 2                        | 2.29                  | 2                        | 2.25                  | 2                        |
| 14042092  | 2.30                  | 2                        | 2.37                  | 2                        | 2.42                  | 2                        | 2.36                  | 2                        |

| Sample ID | Copy Number           |                          |                       |                          |                       |                          |                       |                          |
|-----------|-----------------------|--------------------------|-----------------------|--------------------------|-----------------------|--------------------------|-----------------------|--------------------------|
|           | r = 1                 |                          | r = 2                 |                          | r = 3                 |                          | Average               |                          |
|           | Ratio<br>(target/ref) | Estimated<br>Copy Number |
| 14042093  | 13.39                 | 13                       | 12.96                 | 13                       | 11.65                 | 12                       | 12.67                 | 13                       |
| 14042094  | 1.07                  | 1                        | 1.03                  | 1                        | 0.90                  | 1                        | 1.00                  | 1                        |
| 14042095  | 4.09                  | 4                        | 3.78                  | 4                        | 3.52                  | 4                        | 3.80                  | 4                        |
| 14042096  | 5.55                  | 6                        | 5.51                  | 6                        | 5.52                  | 6                        | 5.52                  | 6                        |
| 14042097  | 5.40                  | 5                        | 5.40                  | 5                        | 5.88                  | 6                        | 5.56                  | 6                        |
| 14042098  | 3.33                  | 3                        | 3.25                  | 3                        | 3.30                  | 3                        | 3.30                  | 3                        |
| 14042099  | 6.70                  | 7                        | 6.15                  | 6                        | 5.77                  | 6                        | 6.20                  | 6                        |
| 14042100  | 7.57                  | 8                        | 6.65                  | 7                        | 7.24                  | 7                        | 7.15                  | 7                        |
| 14042105  | 1.23                  | 1                        | 1.08                  | 1                        | 1.11                  | 1                        | 1.14                  | 1                        |
| 14042106  | 1.26                  | 1                        | 1.22                  | 1                        | 1.24                  | 1                        | 1.24                  | 1                        |
| 14050001  | 1.55                  | 2                        | 1.29                  | 1                        | 1.30                  | 1                        | 1.38                  | 1                        |
| 14050002  | 1.40                  | 1                        | 1.00                  | 1                        | 1.27                  | 1                        | 1.22                  | 1                        |
| 14050003  | 1.46                  | 1                        | 1.34                  | 1                        | 1.37                  | 1                        | 1.39                  | 1                        |
| 14050006  | 2.01                  | 2                        | 2.22                  | 2                        | 1.83                  | 2                        | 2.02                  | 2                        |
| 14050008  | 1.12                  | 1                        | 1.28                  | 1                        | 1.39                  | 1                        | 1.26                  | 1                        |
| 14050009  | 1.22                  | 1                        | 1.17                  | 1                        | 1.29                  | 1                        | 1.23                  | 1                        |
| 14050010  | 1.36                  | 1                        | 1.37                  | 1                        | 1.37                  | 1                        | 1.37                  | 1                        |
| 14050014  | 5.43                  | 5                        | 5.18                  | 5                        | 5.53                  | 6                        | 5.38                  | 5                        |
| 14050015  | 3.70                  | 4                        | 3.91                  | 4                        | 3.60                  | 4                        | 3.74                  | 4                        |

| Sample ID | Copy Number           |                          |                       |                          |                       |                          |                       |                          |
|-----------|-----------------------|--------------------------|-----------------------|--------------------------|-----------------------|--------------------------|-----------------------|--------------------------|
|           | r = 1                 |                          | r = 2                 |                          | r = 3                 |                          | Average               |                          |
|           | Ratio<br>(target/ref) | Estimated<br>Copy Number |
| 14050021  | 1.37                  | 1                        | 0.96                  | 1                        | 1.24                  | 1                        | 1.19                  | 1                        |
| 14050028  | 2.20                  | 2                        | 2.65                  | 3                        | 2.30                  | 2                        | 2.38                  | 2                        |
| 14050029  | 1.33                  | 1                        | 1.13                  | 1                        | 1.22                  | 1                        | 1.23                  | 1                        |
| 14050030  | 1.25                  | 1                        | 1.34                  | 1                        | 0.98                  | 1                        | 1.19                  | 1                        |
| 14050031  | 1.30                  | 1                        | 1.06                  | 1                        | 1.30                  | 1                        | 1.22                  | 1                        |
| 14050032  | 1.71                  | 2                        | 1.68                  | 2                        | 1.74                  | 2                        | 1.71                  | 2                        |
| 14050033  | 14.61                 | 15                       | 11.38                 | 11                       | 13.08                 | 13                       | 13.02                 | 13                       |
| 14050034  | 1.48                  | 1                        | 1.18                  | 1                        | 1.36                  | 1                        | 1.34                  | 1                        |
| 14050035  | 1.40                  | 1                        | 1.34                  | 1                        | 1.50                  | 2                        | 1.41                  | 1                        |
| 14050041  | 1.63                  | 2                        | 1.25                  | 1                        | 1.83                  | 2                        | 1.57                  | 2                        |
| 14050044  | 4.86                  | 5                        | 4.60                  | 5                        | 4.64                  | 5                        | 4.70                  | 5                        |
| 14050046  | 1.20                  | 1                        | 1.48                  | 1                        | 1.49                  | 1                        | 1.39                  | 1                        |
| 14050049  | 2.88                  | 3                        | 2.76                  | 3                        | 2.93                  | 3                        | 2.86                  | 3                        |
| 14050051  | 3.35                  | 3                        | 2.99                  | 3                        | 3.01                  | 3                        | 3.12                  | 3                        |
| 14050058  | 1.56                  | 2                        | 1.17                  | 1                        | 1.31                  | 1                        | 1.35                  | 1                        |
| 14050059  | 2.33                  | 2                        | 2.37                  | 2                        | 2.49                  | 2                        | 2.40                  | 2                        |
| 14050061  | 3.96                  | 4                        | 3.87                  | 4                        | 4.37                  | 4                        | 4.07                  | 4                        |
| 14050064  | 3.56                  | 4                        | 3.23                  | 3                        | 3.49                  | 3                        | 3.43                  | 3                        |
| 14050066  | 13.21                 | 13                       | 12.07                 | 12                       | 10.78                 | 11                       | 12.02                 | 12                       |

| Sample ID | Copy Number           |                          |                       |                          |                       |                          |                       |                          |
|-----------|-----------------------|--------------------------|-----------------------|--------------------------|-----------------------|--------------------------|-----------------------|--------------------------|
|           | r = 1                 |                          | r = 2                 |                          | r = 3                 |                          | Average               |                          |
|           | Ratio<br>(target/ref) | Estimated<br>Copy Number |
| 14050068  | 1.48                  | 1                        | 1.25                  | 1                        | 1.40                  | 1                        | 1.38                  | 1                        |
| 14050070  | 1.26                  | 1                        | 1.30                  | 1                        | 0.91                  | 1                        | 1.15                  | 1                        |
| 14050074  | 4.95                  | 5                        | 5.56                  | 6                        | 4.08                  | 4                        | 4.86                  | 5                        |
| 14050075  | 5.05                  | 5                        | 4.58                  | 5                        | 4.71                  | 5                        | 4.78                  | 5                        |
| 14050077  | 3.59                  | 4                        | 3.44                  | 3                        | 3.55                  | 4                        | 3.52                  | 4                        |
| 14050079  | 1.32                  | 1                        | 1.28                  | 1                        | 1.22                  | 1                        | 1.27                  | 1                        |
| 14050081  | 2.01                  | 2                        | 1.79                  | 2                        | 1.88                  | 2                        | 1.89                  | 2                        |
| 14050082  | 3.03                  | 3                        | 2.51                  | 3                        | 2.47                  | 2                        | 2.67                  | 3                        |
| 14050088  | 1.70                  | 2                        | 1.39                  | 1                        | 1.49                  | 1                        | 1.53                  | 2                        |
| 14050092  | 6.61                  | 7                        | 5.60                  | 6                        | 8.37                  | 8                        | 6.86                  | 7                        |
| 14050093  | 9.72                  | 10                       | 10.71                 | 11                       | 8.95                  | 9                        | 9.79                  | 10                       |
| 14050096  | 6.42                  | 6                        | 6.49                  | 6                        | 4.97                  | 5                        | 5.96                  | 6                        |
| 14050100  | 2.61                  | 3                        | 2.13                  | 2                        | 2.33                  | 2                        | 2.36                  | 2                        |
| 14050104  | 2.79                  | 3                        | 2.99                  | 3                        | 2.96                  | 3                        | 2.91                  | 3                        |
| 14050105  | 3.26                  | 3                        | 2.83                  | 3                        | 2.65                  | 3                        | 2.92                  | 3                        |
| 14050110  | 1.09                  | 1                        | 1.17                  | 1                        | 1.01                  | 1                        | 1.09                  | 1                        |
| 14050112  | 1.28                  | 1                        | 1.20                  | 1                        | 1.29                  | 1                        | 1.26                  | 1                        |
| 14050113  | 1.27                  | 1                        | 1.27                  | 1                        | 1.36                  | 1                        | 1.30                  | 1                        |
| 14050114  | 1.39                  | 1                        | 1.42                  | 1                        | 1.37                  | 1                        | 1.39                  | 1                        |

| Sample ID | Copy Number           |                          |                       |                          |                       |                          |                       |                          |
|-----------|-----------------------|--------------------------|-----------------------|--------------------------|-----------------------|--------------------------|-----------------------|--------------------------|
|           | r = 1                 |                          | r = 2                 |                          | r = 3                 |                          | Average               |                          |
|           | Ratio<br>(target/ref) | Estimated<br>Copy Number |
| 14050118  | 2.81                  | 3                        | 3.13                  | 3                        | 2.51                  | 3                        | 2.82                  | 3                        |
| 14050119  | 4.10                  | 4                        | 3.56                  | 4                        | 4.32                  | 4                        | 3.99                  | 4                        |
| 14050120  | 3.65                  | 4                        | 3.27                  | 3                        | 3.40                  | 3                        | 3.44                  | 3                        |
| 14050121  | 2.28                  | 2                        | 2.40                  | 2                        | 2.24                  | 2                        | 2.30                  | 2                        |
| 14050125  | 1.85                  | 2                        | 2.20                  | 2                        | 2.09                  | 2                        | 2.05                  | 2                        |
| 14050128  | 4.76                  | 5                        | 4.85                  | 5                        | 3.85                  | 4                        | 4.49                  | 4                        |
| 14050129  | 2.94                  | 3                        | 3.30                  | 3                        | 3.39                  | 3                        | 3.21                  | 3                        |
| 14050130  | 3.30                  | 3                        | 3.35                  | 3                        | 3.62                  | 4                        | 3.42                  | 3                        |
| 14050135  | 3.87                  | 4                        | 4.23                  | 4                        | 4.10                  | 4                        | 4.06                  | 4                        |
| 14050137  | 2.74                  | 3                        | 2.78                  | 3                        | 2.91                  | 3                        | 2.81                  | 3                        |
| 14050140  | 3.38                  | 3                        | 3.24                  | 3                        | 3.59                  | 4                        | 3.40                  | 3                        |
| 14050141  | 2.80                  | 3                        | 2.82                  | 3                        | 2.89                  | 3                        | 2.83                  | 3                        |
| 14050142  | 6.01                  | 6                        | 6.54                  | 7                        | 6.05                  | 6                        | 6.20                  | 6                        |
| 14050144  | 2.20                  | 2                        | 2.46                  | 2                        | 2.13                  | 2                        | 2.27                  | 2                        |
| 14050145  | 4.72                  | 5                        | 4.44                  | 4                        | 5.08                  | 5                        | 4.75                  | 5                        |
| 14050147  | 2.28                  | 2                        | 2.37                  | 2                        | 2.30                  | 2                        | 2.32                  | 2                        |
| 14050150  | 2.71                  | 3                        | 2.89                  | 3                        | 2.67                  | 3                        | 2.76                  | 3                        |
| 14050152  | 1.30                  | 1                        | 1.43                  | 1                        | 1.24                  | 1                        | 1.32                  | 1                        |
| 14050155  | 1.30                  | 1                        | 1.34                  | 1                        | 1.38                  | 1                        | 1.34                  | 1                        |

| Sample ID | Copy Number           |                          |                       |                          |                       |                          |                       |                          |
|-----------|-----------------------|--------------------------|-----------------------|--------------------------|-----------------------|--------------------------|-----------------------|--------------------------|
|           | r = 1                 |                          | r = 2                 |                          | r = 3                 |                          | Average               |                          |
|           | Ratio<br>(target/ref) | Estimated<br>Copy Number |
| 14050157  | 1.33                  | 1                        | 1.23                  | 1                        | 1.44                  | 1                        | 1.33                  | 1                        |
| 14050158  | 1.40                  | 1                        | 1.29                  | 1                        | 1.20                  | 1                        | 1.30                  | 1                        |
| 14050160  | 1.48                  | 1                        | 1.45                  | 1                        | 1.50                  | 2                        | 1.48                  | 1                        |
| 14050163  | 1.37                  | 1                        | 1.42                  | 1                        | 1.65                  | 2                        | 1.48                  | 1                        |
| 14050165  | 1.04                  | 1                        | 1.10                  | 1                        | 1.11                  | 1                        | 1.08                  | 1                        |
| 14050167  | 4.65                  | 5                        | 4.82                  | 5                        | 4.99                  | 5                        | 4.82                  | 5                        |
| 14050174  | 5.25                  | 5                        | 4.81                  | 5                        | 4.80                  | 5                        | 4.95                  | 5                        |
| 14050175  | 4.83                  | 5                        | 5.13                  | 5                        | 4.54                  | 5                        | 4.84                  | 5                        |
| 14050183  | 1.32                  | 1                        | 1.31                  | 1                        | 1.28                  | 1                        | 1.30                  | 1                        |
| 14050189  | 2.28                  | 2                        | 2.09                  | 2                        | 2.16                  | 2                        | 2.18                  | 2                        |
| 14050190  | 2.72                  | 3                        | 2.49                  | 2                        | 2.45                  | 2                        | 2.55                  | 3                        |
| 14050191  | 2.47                  | 2                        | 2.59                  | 3                        | 2.67                  | 3                        | 2.58                  | 3                        |
| 14050193  | 5.27                  | 5                        | 5.35                  | 5                        | 5.50                  | 5                        | 5.37                  | 5                        |
| 14050194  | 5.47                  | 5                        | 5.67                  | 6                        | 5.72                  | 6                        | 5.62                  | 6                        |
| 14050199  | 2.32                  | 2                        | 2.41                  | 2                        | 2.43                  | 2                        | 2.39                  | 2                        |
| 14050200  | 2.18                  | 2                        | 2.15                  | 2                        | 2.47                  | 2                        | 2.27                  | 2                        |
| 14050201  | 2.23                  | 2                        | 2.28                  | 2                        | 2.35                  | 2                        | 2.29                  | 2                        |
| 14050203  | 1.35                  | 1                        | 1.34                  | 1                        | 1.54                  | 2                        | 1.41                  | 1                        |
| 14050204  | 4.55                  | 5                        | 4.74                  | 5                        | 4.89                  | 5                        | 4.73                  | 5                        |



| Sample ID | Copy Number           |                          |                       |                          |                       |                          |                       |                          |
|-----------|-----------------------|--------------------------|-----------------------|--------------------------|-----------------------|--------------------------|-----------------------|--------------------------|
|           | r = 1                 |                          | r = 2                 |                          | r = 3                 |                          | Average               |                          |
|           | Ratio<br>(target/ref) | Estimated<br>Copy Number |
| 14050209  | 15.12                 | 15                       | 14.49                 | 14                       | 15.18                 | 15                       | 14.93                 | 15                       |
| 14050210  | 14.06                 | 14                       | 14.31                 | 14                       | 14.76                 | 15                       | 14.37                 | 14                       |
| 14050211  | 3.41                  | 3                        | 3.15                  | 3                        | 3.06                  | 3                        | 3.21                  | 3                        |
| 14050215  | 3.20                  | 3                        | 3.23                  | 3                        | 3.32                  | 3                        | 3.25                  | 3                        |
| 14050216  | 4.59                  | 5                        | 4.60                  | 5                        | 5.16                  | 5                        | 4.78                  | 5                        |
| 14050217  | 3.95                  | 4                        | 3.36                  | 3                        | 3.26                  | 3                        | 3.52                  | 4                        |
| 14050218  | 4.30                  | 4                        | 4.25                  | 4                        | 3.94                  | 4                        | 4.16                  | 4                        |
| 14050219  | 2.62                  | 3                        | 2.73                  | 3                        | 2.47                  | 2                        | 2.61                  | 3                        |
| 14050223  | 1.53                  | 2                        | 1.51                  | 2                        | 1.48                  | 1                        | 1.51                  | 2                        |
| 14050225  | 2.67                  | 3                        | 2.36                  | 2                        | 2.56                  | 3                        | 2.53                  | 3                        |
| 14050226  | 2.15                  | 2                        | 2.14                  | 2                        | 2.21                  | 2                        | 2.16                  | 2                        |
| 14050240  | 2.79                  | 3                        | 2.82                  | 3                        | 2.80                  | 3                        | 2.80                  | 3                        |
| 14050244  | 0.53                  | 1                        | 0.58                  | 1                        | 0.15                  | 0                        | 0.42                  | 0                        |
| 14050245  | 2.58                  | 3                        | 2.61                  | 3                        | 2.74                  | 3                        | 2.64                  | 3                        |
| 14050246  | 1.90                  | 2                        | 1.77                  | 2                        | 1.84                  | 2                        | 1.84                  | 2                        |
| 14050248  | 0.57                  | 1                        | 0.56                  | 1                        | 0.62                  | 1                        | 0.58                  | 1                        |
| 14050269  | 1.51                  | 2                        | 1.54                  | 2                        | 1.38                  | 1                        | 1.48                  | 1                        |
| 14050270  | 1.46                  | 1                        | 1.52                  | 2                        | 1.35                  | 1                        | 1.44                  | 1                        |
| 14050276  | 1.78                  | 2                        | 1.33                  | 1                        | 1.49                  | 1                        | 1.54                  | 2                        |

| Sample ID | Copy Number           |                          |                       |                          |                       |                          |                       |                          |
|-----------|-----------------------|--------------------------|-----------------------|--------------------------|-----------------------|--------------------------|-----------------------|--------------------------|
|           | r = 1                 |                          | r = 2                 |                          | r = 3                 |                          | Average               |                          |
|           | Ratio<br>(target/ref) | Estimated<br>Copy Number |
| 14050277  | 1.34                  | 1                        | 1.30                  | 1                        | 1.18                  | 1                        | 1.27                  | 1                        |
| 14050278  | 1.48                  | 1                        | 0.22                  | 0                        | 1.50                  | 1                        | 1.06                  | 1                        |
| 14050279  | 1.45                  | 1                        | 1.51                  | 2                        | 1.06                  | 1                        | 1.34                  | 1                        |
| 14050283  | 3.91                  | 4                        | 1.85                  | 2                        | 4.44                  | 4                        | 3.40                  | 3                        |
| 14050286  | 1.45                  | 1                        | 1.45                  | 1                        | 1.46                  | 1                        | 1.46                  | 1                        |
| 14050290  | 1.50                  | 1                        | 1.29                  | 1                        | 1.44                  | 1                        | 1.41                  | 1                        |
| 14050291  | 1.44                  | 1                        | 1.31                  | 1                        | 1.33                  | 1                        | 1.36                  | 1                        |
| 14050293  | 4.11                  | 4                        | 4.19                  | 4                        | 4.10                  | 4                        | 4.13                  | 4                        |
| 14050296  | 2.67                  | 3                        | 2.35                  | 2                        | 2.41                  | 2                        | 2.48                  | 2                        |
| 14050298  | 3.33                  | 3                        | 3.43                  | 3                        | 7.05                  | 7                        | 4.61                  | 5                        |
| 14050299  | 1.44                  | 1                        | 1.27                  | 1                        | 1.52                  | 2                        | 1.41                  | 1                        |
| 14050301  | 2.20                  | 2                        | 2.60                  | 3                        | 3.45                  | 3                        | 2.75                  | 3                        |
| 14050304  | 4.55                  | 5                        | 5.76                  | 6                        | 5.93                  | 6                        | 5.41                  | 5                        |
| 14050306  | 1.51                  | 2                        | 1.49                  | 1                        | 1.52                  | 2                        | 1.51                  | 2                        |
| 14050309  | 1.90                  | 2                        | 2.14                  | 2                        | 1.90                  | 2                        | 1.98                  | 2                        |
| 14050310  | 1.17                  | 1                        | 1.39                  | 1                        | 1.19                  | 1                        | 1.25                  | 1                        |
| 14050311  | 1.37                  | 1                        | 1.26                  | 1                        | 1.37                  | 1                        | 1.33                  | 1                        |
| 14050312  | 6.54                  | 7                        | 10.20                 | 10                       | 9.91                  | 10                       | 8.89                  | 9                        |
| 14050313  | 8.18                  | 8                        | 8.15                  | 8                        | 8.58                  | 9                        | 8.30                  | 8                        |

| Sample ID | Copy Number           |                          |                       |                          |                       |                          |                       |                          |
|-----------|-----------------------|--------------------------|-----------------------|--------------------------|-----------------------|--------------------------|-----------------------|--------------------------|
|           | r = 1                 |                          | r = 2                 |                          | r = 3                 |                          | Average               |                          |
|           | Ratio<br>(target/ref) | Estimated<br>Copy Number |
| 14050315  | 2.41                  | 2                        | 2.10                  | 2                        | 1.93                  | 2                        | 2.15                  | 2                        |
| 14050316  | 1.69                  | 2                        | 2.58                  | 3                        | 2.21                  | 2                        | 2.16                  | 2                        |
| 14050319  | 1.90                  | 2                        | 2.13                  | 2                        | 1.99                  | 2                        | 2.01                  | 2                        |
| 14050321  | 1.32                  | 1                        | 1.32                  | 1                        | 1.38                  | 1                        | 1.34                  | 1                        |
| 14050328  | 3.62                  | 4                        | 3.60                  | 4                        | 3.51                  | 4                        | 3.58                  | 4                        |
| 14050329  | 7.78                  | 8                        | 7.81                  | 8                        | 7.77                  | 8                        | 7.79                  | 8                        |
| 14050330  | 3.26                  | 3                        | 3.43                  | 3                        | 4.30                  | 4                        | 3.66                  | 4                        |
| 14050331  | 2.64                  | 3                        | 1.92                  | 2                        | 2.14                  | 2                        | 2.23                  | 2                        |
| 14050332  | 2.34                  | 2                        | 2.19                  | 2                        | 2.18                  | 2                        | 2.24                  | 2                        |
| 14050337  | 1.35                  | 1                        | 1.32                  | 1                        | 1.25                  | 1                        | 1.31                  | 1                        |
| 14050343  | 2.37                  | 2                        | 2.47                  | 2                        | 2.09                  | 2                        | 2.31                  | 2                        |
| 14050345  | 2.98                  | 3                        | 3.33                  | 3                        | 3.19                  | 3                        | 3.17                  | 3                        |
| 14050346  | 1.31                  | 1                        | 1.28                  | 1                        | 1.42                  | 1                        | 1.34                  | 1                        |
| 14050347  | 4.08                  | 4                        | 3.90                  | 4                        | 4.16                  | 4                        | 4.05                  | 4                        |
| 14050353  | 2.14                  | 2                        | 2.14                  | 2                        | 2.27                  | 2                        | 2.18                  | 2                        |
| 14050355  | 1.33                  | 1                        | 1.36                  | 1                        | 1.20                  | 1                        | 1.29                  | 1                        |
| 14050359  | 3.90                  | 4                        | 3.69                  | 4                        | 3.91                  | 4                        | 3.84                  | 4                        |
| 14050360  | 3.84                  | 4                        | 4.29                  | 4                        | 4.50                  | 4                        | 4.21                  | 4                        |
| 14050363  | 3.48                  | 3                        | 3.28                  | 3                        | 3.24                  | 3                        | 3.33                  | 3                        |

| Sample ID | Copy Number           |                          |                       |                          |                       |                          |                       |                          |
|-----------|-----------------------|--------------------------|-----------------------|--------------------------|-----------------------|--------------------------|-----------------------|--------------------------|
|           | r = 1                 |                          | r = 2                 |                          | r = 3                 |                          | Average               |                          |
|           | Ratio<br>(target/ref) | Estimated<br>Copy Number |
| 14050367  | 7.39                  | 7                        | 6.52                  | 7                        | 7.01                  | 7                        | 6.97                  | 7                        |
| 14050368  | 7.34                  | 7                        | 7.21                  | 7                        | 7.17                  | 7                        | 7.24                  | 7                        |
| 14050377  | 4.58                  | 5                        | 5.20                  | 5                        | 4.03                  | 4                        | 4.60                  | 5                        |
| 14050378  | 4.32                  | 4                        | 4.30                  | 4                        | 4.80                  | 5                        | 4.47                  | 4                        |
| 14050380  | 2.12                  | 2                        | 2.15                  | 2                        | 2.19                  | 2                        | 2.15                  | 2                        |
| 14050382  | 6.01                  | 6                        | 6.34                  | 6                        | 7.71                  | 8                        | 6.68                  | 7                        |
| 14050383  | 1.26                  | 1                        | 1.52                  | 2                        | 1.37                  | 1                        | 1.38                  | 1                        |
| 14050385  | 1.37                  | 1                        | 1.57                  | 2                        | 1.38                  | 1                        | 1.44                  | 1                        |
| 14050386  | 1.58                  | 2                        | 1.34                  | 1                        | 1.43                  | 1                        | 1.45                  | 1                        |
| 14050387  | 1.25                  | 1                        | 1.31                  | 1                        | 1.30                  | 1                        | 1.29                  | 1                        |
| 14050388  | 1.23                  | 1                        | 1.40                  | 1                        | 1.31                  | 1                        | 1.31                  | 1                        |
| 14050392  | 1.00                  | 1                        | 0.96                  | 1                        | 1.08                  | 1                        | 1.01                  | 1                        |
| 14050393  | 1.48                  | 1                        | 1.36                  | 1                        | 1.44                  | 1                        | 1.43                  | 1                        |
| 14050395  | 1.40                  | 1                        | 1.33                  | 1                        | 1.39                  | 1                        | 1.37                  | 1                        |
| 14050398  | 1.67                  | 2                        | 1.55                  | 2                        | 1.47                  | 1                        | 1.57                  | 2                        |
| 14050402  | 1.59                  | 2                        | 1.39                  | 1                        | 1.34                  | 1                        | 1.44                  | 1                        |
| 14050404  | 1.24                  | 1                        | 1.28                  | 1                        | 1.27                  | 1                        | 1.26                  | 1                        |
| 14050406  | 1.42                  | 1                        | 1.38                  | 1                        | 1.53                  | 2                        | 1.44                  | 1                        |
| 14050407  | 1.17                  | 1                        | 1.14                  | 1                        | 1.22                  | 1                        | 1.18                  | 1                        |

| Sample ID | Copy Number           |                          |                       |                          |                       |                          |                       |                          |
|-----------|-----------------------|--------------------------|-----------------------|--------------------------|-----------------------|--------------------------|-----------------------|--------------------------|
|           | r = 1                 |                          | r = 2                 |                          | r = 3                 |                          | Average               |                          |
|           | Ratio<br>(target/ref) | Estimated<br>Copy Number |
| 14050408  | 2.47                  | 2                        | 2.37                  | 2                        | 2.45                  | 2                        | 2.43                  | 2                        |
| 14050410  | 1.48                  | 1                        | 1.44                  | 1                        | 1.38                  | 1                        | 1.43                  | 1                        |
| 14050411  | 3.25                  | 3                        | 3.26                  | 3                        | 3.06                  | 3                        | 3.19                  | 3                        |
| 14050412  | 4.86                  | 5                        | 4.92                  | 5                        | 5.17                  | 5                        | 4.98                  | 5                        |
| 14050414  | 2.61                  | 3                        | 2.69                  | 3                        | 2.08                  | 2                        | 2.46                  | 2                        |
| 14050415  | 4.78                  | 5                        | 4.81                  | 5                        | 4.86                  | 5                        | 4.82                  | 5                        |
| 14050419  | 2.14                  | 2                        | 2.21                  | 2                        | 2.05                  | 2                        | 2.13                  | 2                        |
| 14050420  | 2.09                  | 2                        | 2.38                  | 2                        | 2.17                  | 2                        | 2.21                  | 2                        |
| 14050421  | 2.54                  | 3                        | 2.48                  | 2                        | 2.56                  | 3                        | 2.53                  | 3                        |
| 14050422  | 1.14                  | 1                        | 1.29                  | 1                        | 1.39                  | 1                        | 1.27                  | 1                        |
| 14050424  | 1.35                  | 1                        | 1.22                  | 1                        | 1.33                  | 1                        | 1.30                  | 1                        |
| 14050425  | 5.92                  | 6                        | 6.41                  | 6                        | 6.25                  | 6                        | 6.19                  | 6                        |
| 14050428  | 1.20                  | 1                        | 1.10                  | 1                        | 1.28                  | 1                        | 1.19                  | 1                        |
| 14050429  | 3.20                  | 3                        | 2.74                  | 3                        | 3.01                  | 3                        | 2.98                  | 3                        |
| 14050431  | 2.37                  | 2                        | 2.16                  | 2                        | 2.31                  | 2                        | 2.28                  | 2                        |
| 14050432  | 2.29                  | 2                        | 2.09                  | 2                        | 2.31                  | 2                        | 2.23                  | 2                        |
| 14050433  | 2.08                  | 2                        | 1.96                  | 2                        | 1.62                  | 2                        | 1.89                  | 2                        |
| 14050434  | 1.51                  | 2                        | 1.24                  | 1                        | 1.42                  | 1                        | 1.39                  | 1                        |
| 14050440  | 3.33                  | 3                        | 2.85                  | 3                        | 3.07                  | 3                        | 3.09                  | 3                        |

| Sample ID | Copy Number           |                          |                       |                          |                       |                          |                       |                          |
|-----------|-----------------------|--------------------------|-----------------------|--------------------------|-----------------------|--------------------------|-----------------------|--------------------------|
|           | r = 1                 |                          | r = 2                 |                          | r = 3                 |                          | Average               |                          |
|           | Ratio<br>(target/ref) | Estimated<br>Copy Number |
| 14050441  | 3.18                  | 3                        | 3.15                  | 3                        | 3.35                  | 3                        | 3.23                  | 3                        |
| 14050446  | 6.79                  | 7                        | 6.45                  | 6                        | 6.95                  | 7                        | 6.73                  | 7                        |
| 14050449  | 1.33                  | 1                        | 1.44                  | 1                        | 1.50                  | 1                        | 1.42                  | 1                        |
| 14050452  | 2.12                  | 2                        | 2.41                  | 2                        | 1.83                  | 2                        | 2.12                  | 2                        |
| 14050453  | 1.88                  | 2                        | 1.41                  | 1                        | 1.21                  | 1                        | 1.50                  | 1                        |
| 14050457  | 3.12                  | 3                        | 2.98                  | 3                        | 3.45                  | 3                        | 3.19                  | 3                        |
| 14050463  | 2.92                  | 3                        | 3.64                  | 4                        | 2.77                  | 3                        | 3.11                  | 3                        |
| 14050464  | 2.42                  | 2                        | 2.13                  | 2                        | 2.43                  | 2                        | 2.33                  | 2                        |
| 14050465  | 3.88                  | 4                        | 3.39                  | 3                        | 3.36                  | 3                        | 3.54                  | 4                        |
| 14050466  | 1.42                  | 1                        | 1.79                  | 2                        | 1.57                  | 2                        | 1.59                  | 2                        |
| 14050469  | 1.20                  | 1                        | 1.26                  | 1                        | 0.95                  | 1                        | 1.13                  | 1                        |
| 14050470  | 1.37                  | 1                        | 1.34                  | 1                        | 1.36                  | 1                        | 1.36                  | 1                        |
| 14050471  | 1.30                  | 1                        | 1.42                  | 1                        | 1.10                  | 1                        | 1.27                  | 1                        |
| 14050472  | 1.37                  | 1                        | 1.22                  | 1                        | 1.43                  | 1                        | 1.34                  | 1                        |
| 14050473  | 1.14                  | 1                        | 1.26                  | 1                        | 1.39                  | 1                        | 1.26                  | 1                        |
| 14050474  | 1.49                  | 1                        | 1.49                  | 1                        | 1.47                  | 1                        | 1.48                  | 1                        |
| 14050476  | 0.74                  | 1                        | 1.55                  | 2                        | 1.65                  | 2                        | 1.32                  | 1                        |
| 14050477  | 1.25                  | 1                        | 1.10                  | 1                        | 1.16                  | 1                        | 1.17                  | 1                        |
| 14050478  | 1.26                  | 1                        | 1.34                  | 1                        | 1.25                  | 1                        | 1.28                  | 1                        |

| Sample ID | Copy Number           |                          |                       |                          |                       |                          |                       |                          |
|-----------|-----------------------|--------------------------|-----------------------|--------------------------|-----------------------|--------------------------|-----------------------|--------------------------|
|           | r = 1                 |                          | r = 2                 |                          | r = 3                 |                          | Average               |                          |
|           | Ratio<br>(target/ref) | Estimated<br>Copy Number |
| 14050485  | 1.95                  | 2                        | 2.10                  | 2                        | 2.43                  | 2                        | 2.16                  | 2                        |
| 14050486  | 1.15                  | 1                        | 1.21                  | 1                        | 1.36                  | 1                        | 1.24                  | 1                        |
| 14050490  | 1.35                  | 1                        | 1.46                  | 1                        | 1.30                  | 1                        | 1.37                  | 1                        |
| 14050491  | 1.28                  | 1                        | 1.38                  | 1                        | 1.25                  | 1                        | 1.30                  | 1                        |
| 14050496  | 2.78                  | 3                        | 2.67                  | 3                        | 2.91                  | 3                        | 2.78                  | 3                        |
| 14050497  | 2.17                  | 2                        | 2.17                  | 2                        | 1.78                  | 2                        | 2.04                  | 2                        |
| 14050498  | 4.38                  | 4                        | 3.86                  | 4                        | 4.38                  | 4                        | 4.21                  | 4                        |
| 14050499  | 3.96                  | 4                        | 3.75                  | 4                        | 4.29                  | 4                        | 4.00                  | 4                        |
| 14050500  | 3.24                  | 3                        | 3.23                  | 3                        | 2.89                  | 3                        | 3.12                  | 3                        |
| 14050501  | 3.15                  | 3                        | 2.97                  | 3                        | 3.12                  | 3                        | 3.08                  | 3                        |
| 14050502  | 7.52                  | 8                        | 7.34                  | 7                        | 7.92                  | 8                        | 7.60                  | 8                        |
| 14050503  | 1.38                  | 1                        | 1.30                  | 1                        | 1.26                  | 1                        | 1.32                  | 1                        |
| 14050504  | 1.55                  | 2                        | 1.30                  | 1                        | 1.19                  | 1                        | 1.35                  | 1                        |
| 14050505  | 3.66                  | 4                        | 3.54                  | 4                        | 3.67                  | 4                        | 3.62                  | 4                        |
| 14050506  | 5.71                  | 6                        | 5.45                  | 5                        | 5.37                  | 5                        | 5.51                  | 6                        |
| 14050507  | 2.00                  | 2                        | 1.91                  | 2                        | 2.31                  | 2                        | 2.07                  | 2                        |
| 14050508  | 1.32                  | 1                        | 1.26                  | 1                        | 1.19                  | 1                        | 1.26                  | 1                        |
| 14050522  | 2.96                  | 3                        | 3.19                  | 3                        | 2.73                  | 3                        | 2.96                  | 3                        |
| 14050528  | 23.54                 | 24                       | 21.78                 | 22                       | 22.69                 | 23                       | 22.67                 | 23                       |

| Sample ID | Copy Number           |                          |                       |                          |                       |                          |                       |                          |
|-----------|-----------------------|--------------------------|-----------------------|--------------------------|-----------------------|--------------------------|-----------------------|--------------------------|
|           | r = 1                 |                          | r = 2                 |                          | r = 3                 |                          | Average               |                          |
|           | Ratio<br>(target/ref) | Estimated<br>Copy Number |
| 14050531  | 2.21                  | 2                        | 2.08                  | 2                        | 2.11                  | 2                        | 2.13                  | 2                        |
| 14050532  | 4.80                  | 5                        | 5.18                  | 5                        | 4.54                  | 5                        | 4.84                  | 5                        |
| 14050535  | 1.70                  | 2                        | 1.85                  | 2                        | 1.66                  | 2                        | 1.74                  | 2                        |
| 14050541  | 1.17                  | 1                        | 1.09                  | 1                        | 1.22                  | 1                        | 1.16                  | 1                        |
| 14050542  | 2.05                  | 2                        | 2.15                  | 2                        | 2.22                  | 2                        | 2.14                  | 2                        |
| 14050543  | 1.26                  | 1                        | 1.26                  | 1                        | 1.17                  | 1                        | 1.23                  | 1                        |
| 14050545  | 4.18                  | 4                        | 4.44                  | 4                        | 4.04                  | 4                        | 4.22                  | 4                        |
| 14050546  | 4.88                  | 5                        | 4.49                  | 4                        | 5.11                  | 5                        | 4.83                  | 5                        |
| 14050547  | 1.16                  | 1                        | 1.15                  | 1                        | 1.23                  | 1                        | 1.18                  | 1                        |
| 14050548  | 3.34                  | 3                        | 3.66                  | 4                        | 3.39                  | 3                        | 3.47                  | 3                        |
| 14050551  | 1.05                  | 1                        | 1.16                  | 1                        | 1.27                  | 1                        | 1.16                  | 1                        |
| 14050552  | 1.87                  | 2                        | 1.83                  | 2                        | 1.98                  | 2                        | 1.89                  | 2                        |
| 14050553  | 1.97                  | 2                        | 2.03                  | 2                        | 2.23                  | 2                        | 2.08                  | 2                        |
| 14050554  | 2.04                  | 2                        | 1.93                  | 2                        | 1.85                  | 2                        | 1.94                  | 2                        |
| 14050555  | 1.99                  | 2                        | 1.87                  | 2                        | 1.93                  | 2                        | 1.93                  | 2                        |
| 14050556  | 1.98                  | 2                        | 1.99                  | 2                        | 2.09                  | 2                        | 2.02                  | 2                        |
| 14050559  | 1.91                  | 2                        | 1.96                  | 2                        | 2.26                  | 2                        | 2.04                  | 2                        |
| 14050560  | 1.88                  | 2                        | 1.87                  | 2                        | 2.16                  | 2                        | 1.97                  | 2                        |
| 14050563  | 1.92                  | 2                        | 2.04                  | 2                        | 2.11                  | 2                        | 2.02                  | 2                        |



| Sample ID | Copy Number           |                          |                       |                          |                       |                          |                       |                          |
|-----------|-----------------------|--------------------------|-----------------------|--------------------------|-----------------------|--------------------------|-----------------------|--------------------------|
|           | r = 1                 |                          | r = 2                 |                          | r = 3                 |                          | Average               |                          |
|           | Ratio<br>(target/ref) | Estimated<br>Copy Number |
| 14050564  | 3.21                  | 3                        | 3.34                  | 3                        | 3.23                  | 3                        | 3.26                  | 3                        |
| 14050575  | 3.44                  | 3                        | 3.28                  | 3                        | 3.41                  | 3                        | 3.38                  | 3                        |
| 14050576  | 3.38                  | 3                        | 3.11                  | 3                        | 3.15                  | 3                        | 3.21                  | 3                        |
| 14050577  | 3.55                  | 4                        | 3.01                  | 3                        | 3.31                  | 3                        | 3.29                  | 3                        |
| 14050578  | 3.45                  | 3                        | 3.47                  | 3                        | 3.31                  | 3                        | 3.41                  | 3                        |
| 14050579  | 2.43                  | 2                        | 2.49                  | 2                        | 2.43                  | 2                        | 2.45                  | 2                        |
| 14050585  | 2.23                  | 2                        | 2.20                  | 2                        | 2.18                  | 2                        | 2.20                  | 2                        |
| 14050587  | 4.32                  | 4                        | 3.90                  | 4                        | 4.04                  | 4                        | 4.09                  | 4                        |
| 14050592  | 2.51                  | 3                        | 2.42                  | 2                        | 2.66                  | 3                        | 2.53                  | 3                        |
| 14050594  | 9.24                  | 9                        | 11.64                 | 12                       | 10.25                 | 10                       | 10.37                 | 10                       |
| 14050598  | 2.07                  | 2                        | 2.02                  | 2                        | 2.00                  | 2                        | 2.03                  | 2                        |
| 14050599  | 5.28                  | 5                        | 5.59                  | 6                        | 5.70                  | 6                        | 5.52                  | 6                        |
| 14050600  | 6.69                  | 7                        | 5.76                  | 6                        | 5.94                  | 6                        | 6.13                  | 6                        |
| 14050604  | 1.23                  | 1                        | 1.18                  | 1                        | 1.28                  | 1                        | 1.23                  | 1                        |
| 14050609  | 1.26                  | 1                        | 1.29                  | 1                        | 1.38                  | 1                        | 1.31                  | 1                        |
| 14050610  | 1.23                  | 1                        | 1.25                  | 1                        | 1.20                  | 1                        | 1.23                  | 1                        |
| 14050613  | 2.80                  | 3                        | 2.74                  | 3                        | 2.79                  | 3                        | 2.78                  | 3                        |
| 14050616  | 0.99                  | 1                        | 1.20                  | 1                        | 1.15                  | 1                        | 1.11                  | 1                        |
| 14050617  | 1.08                  | 1                        | 1.12                  | 1                        | 1.05                  | 1                        | 1.08                  | 1                        |

| Sample ID | Copy Number           |                          |                       |                          |                       |                          |                       |                          |
|-----------|-----------------------|--------------------------|-----------------------|--------------------------|-----------------------|--------------------------|-----------------------|--------------------------|
|           | r = 1                 |                          | r = 2                 |                          | r = 3                 |                          | Average               |                          |
|           | Ratio<br>(target/ref) | Estimated<br>Copy Number |
| 14050618  | 1.23                  | 1                        | 1.22                  | 1                        | 1.15                  | 1                        | 1.20                  | 1                        |
| 14050619  | 3.72                  | 4                        | 3.75                  | 4                        | 3.15                  | 3                        | 3.54                  | 4                        |
| 14050620  | 3.72                  | 4                        | 3.09                  | 3                        | 2.72                  | 3                        | 3.18                  | 3                        |
| 14050623  | 0.98                  | 1                        | 1.05                  | 1                        | 0.99                  | 1                        | 1.01                  | 1                        |
| 14050625  | 1.09                  | 1                        | 1.14                  | 1                        | 1.18                  | 1                        | 1.14                  | 1                        |
| 14050630  | 1.86                  | 2                        | 1.94                  | 2                        | 1.88                  | 2                        | 1.90                  | 2                        |
| 14050631  | 1.85                  | 2                        | 1.93                  | 2                        | 1.97                  | 2                        | 1.92                  | 2                        |
| 14050632  | 2.35                  | 2                        | 2.48                  | 2                        | 2.47                  | 2                        | 2.43                  | 2                        |
| 14050634  | 3.07                  | 3                        | 3.45                  | 3                        | 4.25                  | 4                        | 3.59                  | 4                        |
| 14050635  | 1.99                  | 2                        | 1.76                  | 2                        | 1.82                  | 2                        | 1.86                  | 2                        |
| 14050640  | 2.70                  | 3                        | 2.82                  | 3                        | 2.84                  | 3                        | 2.79                  | 3                        |
| 14050642  | 1.14                  | 1                        | 1.14                  | 1                        | 1.23                  | 1                        | 1.17                  | 1                        |
| 14050643  | 1.22                  | 1                        | 1.28                  | 1                        | 1.44                  | 1                        | 1.31                  | 1                        |
| 14050644  | 1.16                  | 1                        | 1.27                  | 1                        | 1.22                  | 1                        | 1.22                  | 1                        |
| 14050649  | 1.12                  | 1                        | 1.20                  | 1                        | 1.35                  | 1                        | 1.22                  | 1                        |
| 14050655  | 2.97                  | 3                        | 3.10                  | 3                        | 3.27                  | 3                        | 3.11                  | 3                        |
| 14050657  | 7.33                  | 7                        | 8.65                  | 9                        | 9.05                  | 9                        | 8.35                  | 8                        |
| 14050662  | 1.85                  | 2                        | 2.04                  | 2                        | 1.78                  | 2                        | 1.89                  | 2                        |
| 14050664  | 3.72                  | 4                        | 3.68                  | 4                        | 0.00                  | 0                        | 2.47                  | 2                        |

| Sample ID | Copy Number           |                          |                       |                          |                       |                          |                       |                          |
|-----------|-----------------------|--------------------------|-----------------------|--------------------------|-----------------------|--------------------------|-----------------------|--------------------------|
|           | r = 1                 |                          | r = 2                 |                          | r = 3                 |                          | Average               |                          |
|           | Ratio<br>(target/ref) | Estimated<br>Copy Number |
| 14050665  | 3.61                  | 4                        | 3.87                  | 4                        | 3.85                  | 4                        | 3.78                  | 4                        |
| 14050673  | 4.06                  | 4                        | 3.59                  | 4                        | 4.30                  | 4                        | 3.98                  | 4                        |
| 14050683  | 1.91                  | 2                        | 1.89                  | 2                        | 1.76                  | 2                        | 1.86                  | 2                        |
| 14050684  | 1.98                  | 2                        | 2.01                  | 2                        | 1.84                  | 2                        | 1.95                  | 2                        |
| 14050691  | 3.41                  | 3                        | 3.51                  | 4                        | 3.40                  | 3                        | 3.44                  | 3                        |
| 14050692  | 4.01                  | 4                        | 3.98                  | 4                        | 3.93                  | 4                        | 3.97                  | 4                        |
| 14050693  | 1.27                  | 1                        | 1.15                  | 1                        | 1.24                  | 1                        | 1.22                  | 1                        |
| 14050698  | 3.94                  | 4                        | 3.77                  | 4                        | 4.55                  | 5                        | 4.09                  | 4                        |
| 14050699  | 1.13                  | 1                        | 1.29                  | 1                        | 1.17                  | 1                        | 1.20                  | 1                        |
| 14050710  | 4.65                  | 5                        | 5.28                  | 5                        | 5.42                  | 5                        | 5.11                  | 5                        |
| 14050711  | 7.60                  | 8                        | 6.96                  | 7                        | 6.81                  | 7                        | 7.13                  | 7                        |
| 14050718  | 3.98                  | 4                        | 4.13                  | 4                        | 3.85                  | 4                        | 3.99                  | 4                        |
| 14050737  | 4.83                  | 5                        | 4.42                  | 4                        | 4.84                  | 5                        | 4.70                  | 5                        |
| 14050745  | 1.60                  | 2                        | 1.83                  | 2                        | 1.75                  | 2                        | 1.72                  | 2                        |
| 14050763  | 1.29                  | 1                        | 1.51                  | 2                        | 1.41                  | 1                        | 1.40                  | 1                        |
| 14050786  | 1.19                  | 1                        | 1.34                  | 1                        | 1.20                  | 1                        | 1.24                  | 1                        |
| 14050787  | 1.33                  | 1                        | 1.23                  | 1                        | 1.30                  | 1                        | 1.28                  | 1                        |
| 14050797  | 1.17                  | 1                        | 1.18                  | 1                        | 1.17                  | 1                        | 1.18                  | 1                        |
| 14050801  | 2.72                  | 3                        | 2.41                  | 2                        | 2.48                  | 2                        | 2.54                  | 3                        |

| Sample ID | Copy Number           |                          |                       |                          |                       |                          |                       |                          |
|-----------|-----------------------|--------------------------|-----------------------|--------------------------|-----------------------|--------------------------|-----------------------|--------------------------|
|           | r = 1                 |                          | r = 2                 |                          | r = 3                 |                          | Average               |                          |
|           | Ratio<br>(target/ref) | Estimated<br>Copy Number |
| 14050802  | 15.69                 | 16                       | 14.79                 | 15                       | 15.60                 | 16                       | 15.36                 | 15                       |
| 14050804  | 3.58                  | 4                        | 3.48                  | 3                        | 3.61                  | 4                        | 3.56                  | 4                        |
| 14050805  | 1.34                  | 1                        | 1.35                  | 1                        | 1.41                  | 1                        | 1.37                  | 1                        |
| 14050806  | 1.14                  | 1                        | 1.23                  | 1                        | 1.38                  | 1                        | 1.25                  | 1                        |
| 14050810  | 1.21                  | 1                        | 1.25                  | 1                        | 1.32                  | 1                        | 1.26                  | 1                        |
| 14050814  | 20.12                 | 20                       | 21.61                 | 22                       | 23.50                 | 23                       | 21.74                 | 22                       |
| 14050815  | 2.41                  | 2                        | 2.51                  | 3                        | 2.60                  | 3                        | 2.51                  | 3                        |
| 14050817  | 2.95                  | 3                        | 2.84                  | 3                        | 2.69                  | 3                        | 2.83                  | 3                        |
| 14050824  | 4.24                  | 4                        | 4.08                  | 4                        | 3.67                  | 4                        | 4.00                  | 4                        |
| 14050825  | 3.98                  | 4                        | 3.86                  | 4                        | 3.62                  | 4                        | 3.82                  | 4                        |
| 14050826  | 3.81                  | 4                        | 3.69                  | 4                        | 3.52                  | 4                        | 3.67                  | 4                        |
| 14050830  | 3.77                  | 4                        | 3.70                  | 4                        | 3.32                  | 3                        | 3.60                  | 4                        |
| 14050831  | 3.65                  | 4                        | 3.47                  | 3                        | 3.23                  | 3                        | 3.45                  | 3                        |
| 14050833  | 2.29                  | 2                        | 2.12                  | 2                        | 2.05                  | 2                        | 2.15                  | 2                        |
| 14050835  | 8.00                  | 8                        | 7.96                  | 8                        | 7.29                  | 7                        | 7.75                  | 8                        |
| 14050836  | 3.83                  | 4                        | 3.79                  | 4                        | 3.83                  | 4                        | 3.82                  | 4                        |
| 14050840  | 1.93                  | 2                        | 1.92                  | 2                        | 1.87                  | 2                        | 1.91                  | 2                        |
| 14050841  | 1.69                  | 2                        | 1.70                  | 2                        | 1.75                  | 2                        | 1.71                  | 2                        |
| 14050845  | 8.74                  | 9                        | 7.35                  | 7                        | 7.04                  | 7                        | 7.71                  | 8                        |

| Sample ID | Copy Number           |                          |                       |                          |                       |                          |                       |                          |
|-----------|-----------------------|--------------------------|-----------------------|--------------------------|-----------------------|--------------------------|-----------------------|--------------------------|
|           | r = 1                 |                          | r = 2                 |                          | r = 3                 |                          | Average               |                          |
|           | Ratio<br>(target/ref) | Estimated<br>Copy Number |
| 14050857  | 1.87                  | 2                        | 1.70                  | 2                        | 1.84                  | 2                        | 1.80                  | 2                        |
| 14050858  | 1.22                  | 1                        | 1.14                  | 1                        | 1.32                  | 1                        | 1.23                  | 1                        |
| 14050863  | 2.81                  | 3                        | 2.85                  | 3                        | 2.92                  | 3                        | 2.86                  | 3                        |
| 14050865  | 1.20                  | 1                        | 1.30                  | 1                        | 1.36                  | 1                        | 1.28                  | 1                        |
| 14050866  | 1.20                  | 1                        | 1.14                  | 1                        | 1.31                  | 1                        | 1.22                  | 1                        |
| 14050868  | 2.15                  | 2                        | 2.13                  | 2                        | 1.96                  | 2                        | 2.08                  | 2                        |
| 14050882  | 1.18                  | 1                        | 0.98                  | 1                        | 1.03                  | 1                        | 1.06                  | 1                        |
| 14050892  | 1.28                  | 1                        | 1.14                  | 1                        | 1.10                  | 1                        | 1.17                  | 1                        |
| 14050895  | 3.02                  | 3                        | 2.70                  | 3                        | 2.87                  | 3                        | 2.86                  | 3                        |
| 14050904  | 0.03                  | 0                        | 0.04                  | 0                        | 0.03                  | 0                        | 0.04                  | 0                        |
| 14050907  | 1.75                  | 2                        | 1.50                  | 1                        | 1.54                  | 2                        | 1.60                  | 2                        |
| 14050910  | 2.76                  | 3                        | 2.81                  | 3                        | 2.92                  | 3                        | 2.83                  | 3                        |
| 14050911  | 2.60                  | 3                        | 2.36                  | 2                        | 3.00                  | 3                        | 2.65                  | 3                        |
| 14050912  | 2.70                  | 3                        | 2.65                  | 3                        | 2.43                  | 2                        | 2.59                  | 3                        |
| 14050913  | 2.26                  | 2                        | 2.51                  | 3                        | 2.25                  | 2                        | 2.34                  | 2                        |
| 14050916  | 1.17                  | 1                        | 1.01                  | 1                        | 1.24                  | 1                        | 1.14                  | 1                        |
| 14050917  | 2.25                  | 2                        | 2.12                  | 2                        | 1.89                  | 2                        | 2.09                  | 2                        |
| 14050919  | 6.02                  | 6                        | 5.66                  | 6                        | 5.80                  | 6                        | 5.83                  | 6                        |
| 14050925  | 2.25                  | 2                        | 2.57                  | 3                        | 2.47                  | 2                        | 2.43                  | 2                        |

| Sample ID | Copy Number           |                          |                       |                          |                       |                          |                       |                          |
|-----------|-----------------------|--------------------------|-----------------------|--------------------------|-----------------------|--------------------------|-----------------------|--------------------------|
|           | r = 1                 |                          | r = 2                 |                          | r = 3                 |                          | Average               |                          |
|           | Ratio<br>(target/ref) | Estimated<br>Copy Number |
| 14050930  | 1.39                  | 1                        | 1.46                  | 1                        | 1.39                  | 1                        | 1.41                  | 1                        |
| 14050932  | 1.99                  | 2                        | 1.84                  | 2                        | 1.75                  | 2                        | 1.86                  | 2                        |
| 14050934  | 1.44                  | 1                        | 1.39                  | 1                        | 1.34                  | 1                        | 1.39                  | 1                        |
| 14050942  | 1.32                  | 1                        | 1.36                  | 1                        | 1.00                  | 1                        | 1.23                  | 1                        |
| 14050943  | 3.21                  | 3                        | 3.25                  | 3                        | 2.88                  | 3                        | 3.11                  | 3                        |
| 14050948  | 1.20                  | 1                        | 1.20                  | 1                        | 1.19                  | 1                        | 1.20                  | 1                        |
| 14050950  | 1.18                  | 1                        | 1.22                  | 1                        | 1.10                  | 1                        | 1.17                  | 1                        |
| 14050959  | 1.20                  | 1                        | 1.16                  | 1                        | 1.24                  | 1                        | 1.20                  | 1                        |
| 14050970  | 4.20                  | 4                        | 4.08                  | 4                        | 4.38                  | 4                        | 4.22                  | 4                        |
| 14050973  | 1.36                  | 1                        | 1.30                  | 1                        | 1.43                  | 1                        | 1.36                  | 1                        |
| 14050974  | 1.38                  | 1                        | 1.66                  | 2                        | 1.49                  | 1                        | 1.51                  | 2                        |
| 14050977  | 1.17                  | 1                        | 1.21                  | 1                        | 1.25                  | 1                        | 1.21                  | 1                        |
| 14050981  | 1.14                  | 1                        | 1.26                  | 1                        | 1.12                  | 1                        | 1.17                  | 1                        |
| 14050982  | 1.14                  | 1                        | 1.11                  | 1                        | 1.04                  | 1                        | 1.09                  | 1                        |
| 14050993  | 1.15                  | 1                        | 1.09                  | 1                        | 1.02                  | 1                        | 1.08                  | 1                        |
| 14050994  | 1.87                  | 2                        | 1.84                  | 2                        | 1.92                  | 2                        | 1.88                  | 2                        |
| 14050997  | 0.54                  | 1                        | 0.57                  | 1                        | 0.55                  | 1                        | 0.56                  | 1                        |
| 14050999  | 1.25                  | 1                        | 1.31                  | 1                        | 1.23                  | 1                        | 1.26                  | 1                        |
| 14051000  | 1.44                  | 1                        | 1.43                  | 1                        | 1.26                  | 1                        | 1.38                  | 1                        |

| Sample ID | Copy Number           |                          |                       |                          |                       |                          |                       |                          |
|-----------|-----------------------|--------------------------|-----------------------|--------------------------|-----------------------|--------------------------|-----------------------|--------------------------|
|           | r = 1                 |                          | r = 2                 |                          | r = 3                 |                          | Average               |                          |
|           | Ratio<br>(target/ref) | Estimated<br>Copy Number |
| 14051001  | 2.25                  | 2                        | 2.30                  | 2                        | 2.31                  | 2                        | 2.29                  | 2                        |
| 14051007  | 1.19                  | 1                        | 1.17                  | 1                        | 1.12                  | 1                        | 1.16                  | 1                        |
| 14051011  | 35.90                 | 36                       | 35.30                 | 35                       | 33.28                 | 33                       | 34.83                 | 35                       |
| 14051013  | 3.59                  | 4                        | 3.49                  | 3                        | 3.72                  | 4                        | 3.60                  | 4                        |
| 14051014  | 4.05                  | 4                        | 4.15                  | 4                        | 4.25                  | 4                        | 4.15                  | 4                        |
| 14051016  | 3.11                  | 3                        | 2.95                  | 3                        | 3.17                  | 3                        | 3.08                  | 3                        |
| 14051017  | 4.70                  | 5                        | 4.99                  | 5                        | 4.47                  | 4                        | 4.72                  | 5                        |
| 14051019  | 2.85                  | 3                        | 2.71                  | 3                        | 2.97                  | 3                        | 2.85                  | 3                        |
| 14051023  | 1.91                  | 2                        | 2.19                  | 2                        | 2.19                  | 2                        | 2.09                  | 2                        |
| 14051028  | 1.28                  | 1                        | 1.49                  | 1                        | 1.40                  | 1                        | 1.39                  | 1                        |
| 14051029  | 1.05                  | 1                        | 1.10                  | 1                        | 1.30                  | 1                        | 1.15                  | 1                        |
| 14051030  | 0.78                  | 1                        | 0.80                  | 1                        | 0.66                  | 1                        | 0.75                  | 1                        |
| 14051040  | 1.22                  | 1                        | 1.21                  | 1                        | 1.33                  | 1                        | 1.25                  | 1                        |
| 14051045  | 2.13                  | 2                        | 2.14                  | 2                        | 2.01                  | 2                        | 2.09                  | 2                        |
| 14051047  | 6.64                  | 7                        | 7.38                  | 7                        | 6.43                  | 6                        | 6.82                  | 7                        |
| 14051049  | 1.60                  | 2                        | 1.52                  | 2                        | 1.67                  | 2                        | 1.60                  | 2                        |
| 14051051  | 1.42                  | 1                        | 1.47                  | 1                        | 1.39                  | 1                        | 1.42                  | 1                        |
| 14051054  | 4.84                  | 5                        | 4.34                  | 4                        | 3.73                  | 4                        | 4.30                  | 4                        |
| 14051055  | 4.05                  | 4                        | 3.99                  | 4                        | 3.71                  | 4                        | 3.92                  | 4                        |

| Sample ID | Copy Number           |                          |                       |                          |                       |                          |                       |                          |
|-----------|-----------------------|--------------------------|-----------------------|--------------------------|-----------------------|--------------------------|-----------------------|--------------------------|
|           | r = 1                 |                          | r = 2                 |                          | r = 3                 |                          | Average               |                          |
|           | Ratio<br>(target/ref) | Estimated<br>Copy Number |
| 14051056  | 3.86                  | 4                        | 4.33                  | 4                        | 4.41                  | 4                        | 4.20                  | 4                        |
| 14051058  | 1.11                  | 1                        | 1.21                  | 1                        | 1.30                  | 1                        | 1.21                  | 1                        |
| 14051062  | 2.88                  | 3                        | 2.72                  | 3                        | 2.76                  | 3                        | 2.79                  | 3                        |
| 14051063  | 2.74                  | 3                        | 2.85                  | 3                        | 2.51                  | 3                        | 2.70                  | 3                        |
| 14051065  | 2.53                  | 3                        | 2.28                  | 2                        | 2.37                  | 2                        | 2.39                  | 2                        |
| 14051068  | 2.49                  | 2                        | 2.17                  | 2                        | 2.41                  | 2                        | 2.36                  | 2                        |
| 14051070  | 1.47                  | 1                        | 1.38                  | 1                        | 1.43                  | 1                        | 1.43                  | 1                        |
| 14051074  | 5.17                  | 5                        | 6.05                  | 6                        | 5.99                  | 6                        | 5.73                  | 6                        |
| 14051077  | 1.17                  | 1                        | 1.28                  | 1                        | 1.56                  | 2                        | 1.34                  | 1                        |
| 14051080  | 3.38                  | 3                        | 3.64                  | 4                        | 3.89                  | 4                        | 3.64                  | 4                        |
| 14051081  | 1.31                  | 1                        | 1.48                  | 1                        | 1.60                  | 2                        | 1.46                  | 1                        |
| 14051084  | 1.38                  | 1                        | 1.52                  | 2                        | 1.36                  | 1                        | 1.42                  | 1                        |
| 14051085  | 3.42                  | 3                        | 3.50                  | 3                        | 3.43                  | 3                        | 3.45                  | 3                        |
| 14051090  | 2.56                  | 3                        | 2.52                  | 3                        | 2.37                  | 2                        | 2.48                  | 2                        |
| 14051092  | 2.36                  | 2                        | 2.89                  | 3                        | 2.53                  | 3                        | 2.59                  | 3                        |
| 14051098  | 6.03                  | 6                        | 6.12                  | 6                        | 6.40                  | 6                        | 6.19                  | 6                        |
| 14051104  | 1.49                  | 1                        | 1.39                  | 1                        | 1.38                  | 1                        | 1.42                  | 1                        |
| 14051105  | 1.45                  | 1                        | 1.31                  | 1                        | 1.35                  | 1                        | 1.37                  | 1                        |
| 14051106  | 4.47                  | 4                        | 3.93                  | 4                        | 3.60                  | 4                        | 4.00                  | 4                        |



| Sample ID | Copy Number           |                          |                       |                          |                       |                          |                       |                          |
|-----------|-----------------------|--------------------------|-----------------------|--------------------------|-----------------------|--------------------------|-----------------------|--------------------------|
|           | r = 1                 |                          | r = 2                 |                          | r = 3                 |                          | Average               |                          |
|           | Ratio<br>(target/ref) | Estimated<br>Copy Number |
| 14051110  | 2.45                  | 2                        | 2.39                  | 2                        | 2.36                  | 2                        | 2.40                  | 2                        |
| 14051114  | 3.48                  | 3                        | 3.30                  | 3                        | 2.57                  | 3                        | 3.11                  | 3                        |
| 14051115  | 2.91                  | 3                        | 3.39                  | 3                        | 3.26                  | 3                        | 3.19                  | 3                        |
| 14051116  | 3.24                  | 3                        | 2.85                  | 3                        | 2.81                  | 3                        | 2.97                  | 3                        |
| 14051117  | 5.17                  | 5                        | 4.55                  | 5                        | 3.91                  | 4                        | 4.54                  | 5                        |
| 14051118  | 4.42                  | 4                        | 4.90                  | 5                        | 3.64                  | 4                        | 4.32                  | 4                        |
| 14051121  | 4.34                  | 4                        | 3.98                  | 4                        | 3.79                  | 4                        | 4.04                  | 4                        |
| 14051124  | 1.41                  | 1                        | 1.37                  | 1                        | 1.27                  | 1                        | 1.35                  | 1                        |
| 14051127  | 18.79                 | 19                       | 20.82                 | 21                       | 17.46                 | 17                       | 19.02                 | 19                       |
| 14051129  | 2.45                  | 2                        | 2.54                  | 3                        | 2.24                  | 2                        | 2.41                  | 2                        |
| 14051132  | 4.53                  | 5                        | 4.67                  | 5                        | 4.40                  | 4                        | 4.53                  | 5                        |
| 14051133  | 1.73                  | 2                        | 1.52                  | 2                        | 1.36                  | 1                        | 1.54                  | 2                        |
| 14051134  | 1.20                  | 1                        | 1.26                  | 1                        | 1.15                  | 1                        | 1.20                  | 1                        |
| 14051137  | 1.28                  | 1                        | 1.26                  | 1                        | 1.35                  | 1                        | 1.30                  | 1                        |
| 14051139  | 2.21                  | 2                        | 2.20                  | 2                        | 2.18                  | 2                        | 2.20                  | 2                        |
| 14051142  | 4.24                  | 4                        | 4.30                  | 4                        | 4.38                  | 4                        | 4.31                  | 4                        |
| 14051143  | 4.71                  | 5                        | 4.50                  | 5                        | 4.84                  | 5                        | 4.69                  | 5                        |
| 14051149  | 1.64                  | 2                        | 1.69                  | 2                        | 1.64                  | 2                        | 1.66                  | 2                        |
| 14051155  | 2.07                  | 2                        | 2.15                  | 2                        | 1.98                  | 2                        | 2.07                  | 2                        |

| Sample ID | Copy Number           |                          |                       |                          |                       |                          |                       |                          |
|-----------|-----------------------|--------------------------|-----------------------|--------------------------|-----------------------|--------------------------|-----------------------|--------------------------|
|           | r = 1                 |                          | r = 2                 |                          | r = 3                 |                          | Average               |                          |
|           | Ratio<br>(target/ref) | Estimated<br>Copy Number |
| 14051157  | 10.27                 | 10                       | 10.81                 | 11                       | 10.24                 | 10                       | 10.44                 | 10                       |
| 14051160  | 1.10                  | 1                        | 1.24                  | 1                        | 1.25                  | 1                        | 1.19                  | 1                        |
| 14051161  | 1.18                  | 1                        | 1.22                  | 1                        | 1.23                  | 1                        | 1.21                  | 1                        |
| 14051165  | 3.47                  | 3                        | 4.64                  | 5                        | 4.54                  | 5                        | 4.22                  | 4                        |
| 14051175  | 2.84                  | 3                        | 2.94                  | 3                        | 3.61                  | 4                        | 3.13                  | 3                        |
| 14051177  | 1.36                  | 1                        | 1.25                  | 1                        | 1.21                  | 1                        | 1.27                  | 1                        |
| 14051178  | 2.00                  | 2                        | 2.05                  | 2                        | 1.73                  | 2                        | 1.92                  | 2                        |
| 14051188  | 1.76                  | 2                        | 2.06                  | 2                        | 1.97                  | 2                        | 1.93                  | 2                        |
| 14051191  | 4.09                  | 4                        | 4.37                  | 4                        | 4.24                  | 4                        | 4.24                  | 4                        |
| 14051192  | 4.45                  | 4                        | 4.44                  | 4                        | 5.07                  | 5                        | 4.66                  | 5                        |
| 14051198  | 1.90                  | 2                        | 2.07                  | 2                        | 1.85                  | 2                        | 1.94                  | 2                        |
| 14051199  | 1.92                  | 2                        | 2.08                  | 2                        | 1.97                  | 2                        | 1.99                  | 2                        |
| 14051202  | 12.58                 | 13                       | 11.60                 | 12                       | 8.70                  | 9                        | 10.96                 | 11                       |
| 14051203  | 3.15                  | 3                        | 3.12                  | 3                        | 3.17                  | 3                        | 3.15                  | 3                        |
| 14051207  | 1.23                  | 1                        | 1.29                  | 1                        | 1.42                  | 1                        | 1.31                  | 1                        |
| 14051215  | 3.55                  | 4                        | 4.36                  | 4                        | 4.09                  | 4                        | 4.00                  | 4                        |
| 14051217  | 1.28                  | 1                        | 1.28                  | 1                        | 1.39                  | 1                        | 1.32                  | 1                        |
| 14051218  | 2.36                  | 2                        | 2.70                  | 3                        | 2.19                  | 2                        | 2.42                  | 2                        |
| 14051222  | 1.13                  | 1                        | 1.34                  | 1                        | 1.14                  | 1                        | 1.20                  | 1                        |

| Sample ID | Copy Number           |                          |                       |                          |                       |                          |                       |                          |
|-----------|-----------------------|--------------------------|-----------------------|--------------------------|-----------------------|--------------------------|-----------------------|--------------------------|
|           | r = 1                 |                          | r = 2                 |                          | r = 3                 |                          | Average               |                          |
|           | Ratio<br>(target/ref) | Estimated<br>Copy Number |
| 14051230  | 1.46                  | 1                        | 1.25                  | 1                        | 1.15                  | 1                        | 1.29                  | 1                        |
| 14051234  | 1.39                  | 1                        | 1.30                  | 1                        | 1.31                  | 1                        | 1.33                  | 1                        |
| 14051242  | 2.43                  | 2                        | 2.25                  | 2                        | 2.10                  | 2                        | 2.26                  | 2                        |
| 14051243  | 2.50                  | 2                        | 2.49                  | 2                        | 2.52                  | 3                        | 2.50                  | 3                        |
| 14051247  | 1.58                  | 2                        | 1.29                  | 1                        | 1.36                  | 1                        | 1.41                  | 1                        |
| 14051250  | 1.67                  | 2                        | 1.64                  | 2                        | 1.45                  | 1                        | 1.58                  | 2                        |
| 14051251  | 4.43                  | 4                        | 4.46                  | 4                        | 4.39                  | 4                        | 4.43                  | 4                        |
| 14051252  | 5.38                  | 5                        | 4.84                  | 5                        | 4.47                  | 4                        | 4.90                  | 5                        |
| 14051253  | 0.97                  | 1                        | 1.23                  | 1                        | 1.33                  | 1                        | 1.18                  | 1                        |
| 14051256  | 1.11                  | 1                        | 1.13                  | 1                        | 1.26                  | 1                        | 1.17                  | 1                        |
| 14051259  | 1.22                  | 1                        | 1.32                  | 1                        | 1.08                  | 1                        | 1.20                  | 1                        |
| 14051260  | 1.32                  | 1                        | 1.34                  | 1                        | 1.30                  | 1                        | 1.32                  | 1                        |
| 14051267  | 10.72                 | 11                       | 9.82                  | 10                       | 10.00                 | 10                       | 10.18                 | 10                       |
| 14051269  | 2.21                  | 2                        | 2.39                  | 2                        | 2.55                  | 3                        | 2.38                  | 2                        |
| 14051270  | 2.31                  | 2                        | 2.39                  | 2                        | 2.25                  | 2                        | 2.32                  | 2                        |
| 14051272  | 2.47                  | 2                        | 3.00                  | 3                        | 3.16                  | 3                        | 2.87                  | 3                        |
| 14051274  | 3.51                  | 4                        | 3.42                  | 3                        | 3.71                  | 4                        | 3.54                  | 4                        |
| 14051275  | 4.52                  | 5                        | 4.83                  | 5                        | 5.03                  | 5                        | 4.79                  | 5                        |
| 14051276  | 1.65                  | 2                        | 1.72                  | 2                        | 1.72                  | 2                        | 1.70                  | 2                        |

| Sample ID | Copy Number           |                          |                       |                          |                       |                          |                       |                          |
|-----------|-----------------------|--------------------------|-----------------------|--------------------------|-----------------------|--------------------------|-----------------------|--------------------------|
|           | r = 1                 |                          | r = 2                 |                          | r = 3                 |                          | Average               |                          |
|           | Ratio<br>(target/ref) | Estimated<br>Copy Number |
| 14051279  | 2.55                  | 3                        | 2.13                  | 2                        | 2.32                  | 2                        | 2.34                  | 2                        |
| 14051280  | 1.54                  | 2                        | 1.19                  | 1                        | 1.05                  | 1                        | 1.26                  | 1                        |
| 14051282  | 1.13                  | 1                        | 1.22                  | 1                        | 1.15                  | 1                        | 1.17                  | 1                        |
| 14051283  | 1.11                  | 1                        | 1.11                  | 1                        | 1.32                  | 1                        | 1.18                  | 1                        |
| 14051286  | 3.12                  | 3                        | 3.60                  | 4                        | 3.87                  | 4                        | 3.53                  | 4                        |
| 14051288  | 2.16                  | 2                        | 2.07                  | 2                        | 2.13                  | 2                        | 2.12                  | 2                        |
| 14051293  | 2.25                  | 2                        | 2.27                  | 2                        | 2.27                  | 2                        | 2.27                  | 2                        |
| 14051295  | 1.24                  | 1                        | 1.18                  | 1                        | 1.13                  | 1                        | 1.18                  | 1                        |
| 14051300  | 2.27                  | 2                        | 2.25                  | 2                        | 1.89                  | 2                        | 2.14                  | 2                        |
| 14051301  | 2.01                  | 2                        | 2.25                  | 2                        | 1.99                  | 2                        | 2.08                  | 2                        |
| 14051302  | 1.22                  | 1                        | 1.23                  | 1                        | 1.13                  | 1                        | 1.19                  | 1                        |
| 14051310  | 1.46                  | 1                        | 1.37                  | 1                        | 1.24                  | 1                        | 1.35                  | 1                        |
| 14051327  | 1.39                  | 1                        | 1.33                  | 1                        | 1.42                  | 1                        | 1.38                  | 1                        |
| 14051331  | 3.64                  | 4                        | 3.73                  | 4                        | 3.81                  | 4                        | 3.73                  | 4                        |
| 14051333  | 6.88                  | 7                        | 7.79                  | 8                        | 8.08                  | 8                        | 7.58                  | 8                        |
| 14051338  | 0.48                  | 0                        | 0.53                  | 1                        | 0.44                  | 0                        | 0.48                  | 0                        |
| 14051350  | 4.98                  | 5                        | 5.02                  | 5                        | 4.88                  | 5                        | 4.96                  | 5                        |
| 14051352  | 1.34                  | 1                        | 1.21                  | 1                        | 1.37                  | 1                        | 1.30                  | 1                        |
| 14051353  | 2.26                  | 2                        | 2.11                  | 2                        | 2.01                  | 2                        | 2.13                  | 2                        |

| Sample ID | Copy Number           |                          |                       |                          |                       |                          |                       |                          |
|-----------|-----------------------|--------------------------|-----------------------|--------------------------|-----------------------|--------------------------|-----------------------|--------------------------|
|           | r = 1                 |                          | r = 2                 |                          | r = 3                 |                          | Average               |                          |
|           | Ratio<br>(target/ref) | Estimated<br>Copy Number |
| 14051356  | 1.43                  | 1                        | 1.42                  | 1                        | 1.45                  | 1                        | 1.43                  | 1                        |
| 14051382  | 3.11                  | 3                        | 2.75                  | 3                        | 3.55                  | 4                        | 3.14                  | 3                        |
| 14051385  | 1.33                  | 1                        | 1.45                  | 1                        | 1.43                  | 1                        | 1.40                  | 1                        |
| 14051386  | 1.32                  | 1                        | 1.26                  | 1                        | 1.53                  | 2                        | 1.37                  | 1                        |
| 14051390  | 2.02                  | 2                        | 1.96                  | 2                        | 2.24                  | 2                        | 2.07                  | 2                        |
| 14051392  | 1.88                  | 2                        | 2.18                  | 2                        | 2.44                  | 2                        | 2.17                  | 2                        |
| 14051394  | 0.98                  | 1                        | 1.17                  | 1                        | 0.91                  | 1                        | 1.02                  | 1                        |
| 14051396  | 1.94                  | 2                        | 1.93                  | 2                        | 1.72                  | 2                        | 1.86                  | 2                        |
| 14051402  | 1.14                  | 1                        | 1.16                  | 1                        | 1.07                  | 1                        | 1.12                  | 1                        |
| 14051406  | 2.67                  | 3                        | 2.54                  | 3                        | 2.10                  | 2                        | 2.44                  | 2                        |
| 14051430  | 9.87                  | 10                       | 8.81                  | 9                        | 8.62                  | 9                        | 9.10                  | 9                        |
| 14051437  | 4.15                  | 4                        | 3.85                  | 4                        | 4.26                  | 4                        | 4.08                  | 4                        |
| 14051455  | 1.41                  | 1                        | 1.14                  | 1                        | 1.31                  | 1                        | 1.28                  | 1                        |
| 14051456  | 1.40                  | 1                        | 1.40                  | 1                        | 1.29                  | 1                        | 1.36                  | 1                        |
| 14051458  | 3.52                  | 4                        | 3.03                  | 3                        | 3.34                  | 3                        | 3.30                  | 3                        |
| 14051477  | 2.88                  | 3                        | 2.56                  | 3                        | 2.28                  | 2                        | 2.58                  | 3                        |
| 14051480  | 1.23                  | 1                        | 1.23                  | 1                        | 1.19                  | 1                        | 1.22                  | 1                        |
| 14051483  | 2.35                  | 2                        | 2.28                  | 2                        | 2.09                  | 2                        | 2.24                  | 2                        |
| 14051484  | 3.68                  | 4                        | 3.68                  | 4                        | 3.47                  | 3                        | 3.61                  | 4                        |

| Sample ID | Copy Number           |                          |                       |                          |                       |                          |                       |                          |
|-----------|-----------------------|--------------------------|-----------------------|--------------------------|-----------------------|--------------------------|-----------------------|--------------------------|
|           | r = 1                 |                          | r = 2                 |                          | r = 3                 |                          | Average               |                          |
|           | Ratio<br>(target/ref) | Estimated<br>Copy Number |
| 14051486  | 2.70                  | 3                        | 2.30                  | 2                        | 2.47                  | 2                        | 2.49                  | 2                        |
| 14051489  | 17.87                 | 18                       | 15.89                 | 16                       | 14.52                 | 15                       | 16.09                 | 16                       |
| 14051491  | 1.28                  | 1                        | 1.24                  | 1                        | 1.20                  | 1                        | 1.24                  | 1                        |
| 14051492  | 2.54                  | 3                        | 2.51                  | 3                        | 2.31                  | 2                        | 2.45                  | 2                        |
| 14051493  | 1.57                  | 2                        | 1.88                  | 2                        | 1.81                  | 2                        | 1.75                  | 2                        |
| 14051495  | 4.60                  | 5                        | 5.30                  | 5                        | 5.22                  | 5                        | 5.04                  | 5                        |
| 14051496  | 5.47                  | 5                        | 5.54                  | 6                        | 5.91                  | 6                        | 5.64                  | 6                        |
| 14150001  | 5.36                  | 5                        | 5.08                  | 5                        | 4.62                  | 5                        | 5.02                  | 5                        |
| 14180006  | 1.71                  | 2                        | 1.87                  | 2                        | 1.58                  | 2                        | 1.72                  | 2                        |
| 14180007  | 1.85                  | 2                        | 1.70                  | 2                        | 1.77                  | 2                        | 1.77                  | 2                        |
| 14180008  | 1.99                  | 2                        | 1.46                  | 1                        | 1.66                  | 2                        | 1.70                  | 2                        |
| 14180009  | 1.82                  | 2                        | 1.80                  | 2                        | 1.79                  | 2                        | 1.80                  | 2                        |
| 14180011  | 1.91                  | 2                        | 1.61                  | 2                        | 1.95                  | 2                        | 1.82                  | 2                        |
| 14180012  | 2.15                  | 2                        | 2.44                  | 2                        | 2.24                  | 2                        | 2.28                  | 2                        |
| 14720170  | 3.57                  | 4                        | 3.47                  | 3                        | 3.50                  | 3                        | 3.51                  | 4                        |
| 14720329  | 1.33                  | 1                        | 1.36                  | 1                        | 1.11                  | 1                        | 1.27                  | 1                        |
| 14730039  | 3.57                  | 4                        | 2.90                  | 3                        | 2.65                  | 3                        | 3.04                  | 3                        |
| 14730119  | 0.29                  | 0                        | 0.25                  | 0                        | 0.23                  | 0                        | 0.25                  | 0                        |
| 14730167  | 1.41                  | 1                        | 1.21                  | 1                        | 1.43                  | 1                        | 1.35                  | 1                        |

| Sample ID | Copy Number           |                          |                       |                          |                       |                          |                       |                          |
|-----------|-----------------------|--------------------------|-----------------------|--------------------------|-----------------------|--------------------------|-----------------------|--------------------------|
|           | r = 1                 |                          | r = 2                 |                          | r = 3                 |                          | Average               |                          |
|           | Ratio<br>(target/ref) | Estimated<br>Copy Number |
| 14730169  | 0.02                  | 0                        | 0.03                  | 0                        | 0.04                  | 0                        | 0.03                  | 0                        |
| 14730175  | 2.33                  | 2                        | 2.37                  | 2                        | 2.16                  | 2                        | 2.29                  | 2                        |
| 14730177  | 2.24                  | 2                        | 2.45                  | 2                        | 2.39                  | 2                        | 2.36                  | 2                        |
| 14730181  | 1.54                  | 2                        | 1.59                  | 2                        | 1.19                  | 1                        | 1.44                  | 1                        |
| 14730183  | 1.43                  | 1                        | 1.34                  | 1                        | 1.27                  | 1                        | 1.35                  | 1                        |
| 14740011  | 1.37                  | 1                        | 1.34                  | 1                        | 1.14                  | 1                        | 1.28                  | 1                        |
| 14740038  | 1.26                  | 1                        | 1.38                  | 1                        | 1.21                  | 1                        | 1.28                  | 1                        |
| 14740055  | 2.52                  | 3                        | 2.56                  | 3                        | 3.07                  | 3                        | 2.72                  | 3                        |
| 14740074  | 1.31                  | 1                        | 1.37                  | 1                        | 1.24                  | 1                        | 1.30                  | 1                        |
| 14740077  | 1.37                  | 1                        | 1.45                  | 1                        | 1.44                  | 1                        | 1.42                  | 1                        |
| 14740085  | 1.22                  | 1                        | 1.32                  | 1                        | 1.30                  | 1                        | 1.28                  | 1                        |
| 14740092  | 1.48                  | 1                        | 1.44                  | 1                        | 1.26                  | 1                        | 1.40                  | 1                        |
| 14740099  | 1.27                  | 1                        | 1.42                  | 1                        | 1.50                  | 1                        | 1.40                  | 1                        |
| 14740167  | 1.13                  | 1                        | 1.06                  | 1                        | 1.17                  | 1                        | 1.12                  | 1                        |
| 14740189  | 2.99                  | 3                        | 2.98                  | 3                        | 2.74                  | 3                        | 2.90                  | 3                        |
| 14740229  | 1.49                  | 1                        | 1.63                  | 2                        | 1.46                  | 1                        | 1.53                  | 2                        |
| 14750031  | 2.25                  | 2                        | 1.94                  | 2                        | 2.19                  | 2                        | 2.13                  | 2                        |
| 14750037  | 1.92                  | 2                        | 1.86                  | 2                        | 1.67                  | 2                        | 1.82                  | 2                        |
| 14750045  | 2.59                  | 3                        | 2.76                  | 3                        | 2.92                  | 3                        | 2.76                  | 3                        |

| Sample ID | Copy Number           |                          |                       |                          |                       |                          |                       |                          |
|-----------|-----------------------|--------------------------|-----------------------|--------------------------|-----------------------|--------------------------|-----------------------|--------------------------|
|           | r = 1                 |                          | r = 2                 |                          | r = 3                 |                          | Average               |                          |
|           | Ratio<br>(target/ref) | Estimated<br>Copy Number |
| 14750083  | 1.44                  | 1                        | 2.03                  | 2                        | 1.70                  | 2                        | 1.72                  | 2                        |
| 14750093  | 2.42                  | 2                        | 1.98                  | 2                        | 2.23                  | 2                        | 2.21                  | 2                        |
| 14750121  | 0.28                  | 0                        | 0.28                  | 0                        | 0.32                  | 0                        | 0.30                  | 0                        |
| 14750127  | 1.48                  | 1                        | 1.35                  | 1                        | 1.12                  | 1                        | 1.31                  | 1                        |
| 14750141  | 1.69                  | 2                        | 1.84                  | 2                        | 1.95                  | 2                        | 1.83                  | 2                        |
| 14750164  | 1.52                  | 2                        | 1.36                  | 1                        | 1.26                  | 1                        | 1.38                  | 1                        |
| 14750190  | 1.12                  | 1                        | 1.24                  | 1                        | 1.13                  | 1                        | 1.16                  | 1                        |
| 14760025  | 2.27                  | 2                        | 2.30                  | 2                        | 1.86                  | 2                        | 2.14                  | 2                        |
| 14760031  | 1.66                  | 2                        | 1.60                  | 2                        | 1.57                  | 2                        | 1.61                  | 2                        |
| 14760044  | 1.61                  | 2                        | 2.03                  | 2                        | 1.74                  | 2                        | 1.79                  | 2                        |
| 14760054  | 5.41                  | 5                        | 5.71                  | 6                        | 5.04                  | 5                        | 5.39                  | 5                        |
| 14760058  | 0.50                  | 0                        | 0.54                  | 1                        | 0.61                  | 1                        | 0.55                  | 1                        |
| 14760061  | 2.83                  | 3                        | 2.27                  | 2                        | 2.50                  | 2                        | 2.53                  | 3                        |
| 14760064  | 1.85                  | 2                        | 1.97                  | 2                        | 2.11                  | 2                        | 1.97                  | 2                        |
| 14760065  | 1.12                  | 1                        | 1.29                  | 1                        | 1.23                  | 1                        | 1.22                  | 1                        |
| 14760077  | 2.08                  | 2                        | 1.94                  | 2                        | 2.17                  | 2                        | 2.06                  | 2                        |
| 14760079  | 0.94                  | 1                        | 0.95                  | 1                        | 0.88                  | 1                        | 0.92                  | 1                        |
| 14760085  | 1.94                  | 2                        | 2.29                  | 2                        | 1.94                  | 2                        | 2.06                  | 2                        |
| 14760090  | 3.25                  | 3                        | 2.80                  | 3                        | 3.30                  | 3                        | 3.11                  | 3                        |



| Sample ID | Copy Number           |                          |                       |                          |                       |                          |                       |                          |
|-----------|-----------------------|--------------------------|-----------------------|--------------------------|-----------------------|--------------------------|-----------------------|--------------------------|
|           | r = 1                 |                          | r = 2                 |                          | r = 3                 |                          | Average               |                          |
|           | Ratio<br>(target/ref) | Estimated<br>Copy Number |
| 14760091  | 1.17                  | 1                        | 1.34                  | 1                        | 1.26                  | 1                        | 1.26                  | 1                        |
| 14760092  | 2.06                  | 2                        | 2.08                  | 2                        | 2.05                  | 2                        | 2.06                  | 2                        |
| 14760096  | 2.49                  | 2                        | 1.96                  | 2                        | 2.00                  | 2                        | 2.15                  | 2                        |
| 14760097  | 4.16                  | 4                        | 3.72                  | 4                        | 4.56                  | 5                        | 4.15                  | 4                        |
| 14760099  | 1.29                  | 1                        | 1.22                  | 1                        | 1.28                  | 1                        | 1.26                  | 1                        |
| 14770002  | 2.88                  | 3                        | 3.23                  | 3                        | 3.42                  | 3                        | 3.18                  | 3                        |
| 14770015  | 1.80                  | 2                        | 2.13                  | 2                        | 1.89                  | 2                        | 1.94                  | 2                        |
| 14770018  | 3.64                  | 4                        | 2.47                  | 2                        | 2.87                  | 3                        | 2.99                  | 3                        |
| 14770039  | 1.06                  | 1                        | 1.10                  | 1                        | 0.94                  | 1                        | 1.04                  | 1                        |
| 14770048  | 3.17                  | 3                        | 2.82                  | 3                        | 2.93                  | 3                        | 2.98                  | 3                        |
| 14770056  | 2.54                  | 3                        | 0.16                  | 0                        | 2.18                  | 2                        | 1.63                  | 2                        |
| 14770057  | 1.03                  | 1                        | 1.13                  | 1                        | 0.96                  | 1                        | 1.04                  | 1                        |
| 14770062  | 3.49                  | 3                        | 3.12                  | 3                        | 2.69                  | 3                        | 3.10                  | 3                        |
| 14770070  | 0.89                  | 1                        | 0.92                  | 1                        | 0.96                  | 1                        | 0.92                  | 1                        |
| 14770075  | 3.80                  | 4                        | 2.46                  | 2                        | 3.14                  | 3                        | 3.13                  | 3                        |
| 14770087  | 4.24                  | 4                        | 2.40                  | 2                        | 2.26                  | 2                        | 2.96                  | 3                        |
| 14770098  | 2.71                  | 3                        | 2.93                  | 3                        | 1.71                  | 2                        | 2.45                  | 2                        |
| 14770103  | 2.92                  | 3                        | 3.02                  | 3                        | 2.73                  | 3                        | 2.89                  | 3                        |
| 14770114  | 3.44                  | 3                        | 3.13                  | 3                        | 3.28                  | 3                        | 3.28                  | 3                        |

| Sample ID | Copy Number           |                          |                       |                          |                       |                          |                       |                          |
|-----------|-----------------------|--------------------------|-----------------------|--------------------------|-----------------------|--------------------------|-----------------------|--------------------------|
|           | r = 1                 |                          | r = 2                 |                          | r = 3                 |                          | Average               |                          |
|           | Ratio<br>(target/ref) | Estimated<br>Copy Number |
| 14770127  | 2.56                  | 3                        | 2.57                  | 3                        | 2.59                  | 3                        | 2.57                  | 3                        |
| 14770169  | 3.90                  | 4                        | 3.35                  | 3                        | 3.52                  | 4                        | 3.59                  | 4                        |
| 14770195  | 2.34                  | 2                        | 2.25                  | 2                        | 2.23                  | 2                        | 2.27                  | 2                        |
| 14770204  | 1.11                  | 1                        | 1.04                  | 1                        | 0.83                  | 1                        | 0.99                  | 1                        |
| 14770215  | 2.09                  | 2                        | 2.20                  | 2                        | 1.93                  | 2                        | 2.07                  | 2                        |
| 14770222  | 1.16                  | 1                        | 1.22                  | 1                        | 1.19                  | 1                        | 1.19                  | 1                        |
| 14770238  | 2.56                  | 3                        | 2.50                  | 2                        | 2.45                  | 2                        | 2.50                  | 3                        |
| 14770252  | 2.45                  | 2                        | 2.21                  | 2                        | 2.16                  | 2                        | 2.27                  | 2                        |
| 14770255  | 1.97                  | 2                        | 2.10                  | 2                        | 2.44                  | 2                        | 2.17                  | 2                        |
| 14770270  | 1.73                  | 2                        | 2.02                  | 2                        | 1.93                  | 2                        | 1.90                  | 2                        |
| 14770301  | 2.09                  | 2                        | 2.14                  | 2                        | 1.67                  | 2                        | 1.96                  | 2                        |
| 14770306  | 1.38                  | 1                        | 1.22                  | 1                        | 1.24                  | 1                        | 1.28                  | 1                        |
| 14770311  | 1.41                  | 1                        | 1.43                  | 1                        | 1.71                  | 2                        | 1.52                  | 2                        |
| 14770320  | 1.33                  | 1                        | 1.52                  | 2                        | 1.48                  | 1                        | 1.44                  | 1                        |
| 14770329  | 1.71                  | 2                        | 1.25                  | 1                        | 1.86                  | 2                        | 1.61                  | 2                        |
| 14770331  | 2.40                  | 2                        | 2.01                  | 2                        | 2.75                  | 3                        | 2.39                  | 2                        |
| 14770343  | 1.07                  | 1                        | 0.98                  | 1                        | 0.97                  | 1                        | 1.01                  | 1                        |
| 14770350  | 1.83                  | 2                        | 1.83                  | 2                        | 2.34                  | 2                        | 2.00                  | 2                        |
| 14770390  | 3.29                  | 3                        | 4.19                  | 4                        | 2.91                  | 3                        | 3.46                  | 3                        |

| Sample ID | Copy Number           |                          |                       |                          |                       |                          |                       |                          |
|-----------|-----------------------|--------------------------|-----------------------|--------------------------|-----------------------|--------------------------|-----------------------|--------------------------|
|           | r = 1                 |                          | r = 2                 |                          | r = 3                 |                          | Average               |                          |
|           | Ratio<br>(target/ref) | Estimated<br>Copy Number |
| 14770395  | 1.69                  | 2                        | 1.60                  | 2                        | 2.03                  | 2                        | 1.77                  | 2                        |
| 14770405  | 1.08                  | 1                        | 1.04                  | 1                        | 1.20                  | 1                        | 1.11                  | 1                        |
| 14770408  | 1.15                  | 1                        | 1.11                  | 1                        | 1.23                  | 1                        | 1.16                  | 1                        |
| 14770409  | 2.08                  | 2                        | 2.26                  | 2                        | 1.58                  | 2                        | 1.97                  | 2                        |
| 14770429  | 1.30                  | 1                        | 1.32                  | 1                        | 1.53                  | 2                        | 1.38                  | 1                        |
| 14770439  | 1.74                  | 2                        | 2.35                  | 2                        | 2.28                  | 2                        | 2.12                  | 2                        |
| 14770440  | 0.96                  | 1                        | 1.20                  | 1                        | 1.37                  | 1                        | 1.18                  | 1                        |
| 14770443  | 1.10                  | 1                        | 1.15                  | 1                        | 1.43                  | 1                        | 1.22                  | 1                        |
| 14780012  | 1.89                  | 2                        | 2.04                  | 2                        | 2.27                  | 2                        | 2.07                  | 2                        |
| 14780013  | 1.81                  | 2                        | 1.92                  | 2                        | 2.36                  | 2                        | 2.03                  | 2                        |
| 14780021  | 8.60                  | 9                        | 12.12                 | 12                       | 7.82                  | 8                        | 9.51                  | 10                       |
| 14780036  | 3.26                  | 3                        | 3.01                  | 3                        | 3.12                  | 3                        | 3.13                  | 3                        |
| 14780039  | 2.90                  | 3                        | 3.72                  | 4                        | 4.19                  | 4                        | 3.60                  | 4                        |
| 14780040  | 1.22                  | 1                        | 1.43                  | 1                        | 1.34                  | 1                        | 1.33                  | 1                        |
| 14780050  | 1.51                  | 2                        | 1.97                  | 2                        | 1.68                  | 2                        | 1.72                  | 2                        |
| 14780053  | 1.19                  | 1                        | 0.75                  | 1                        | 1.20                  | 1                        | 1.05                  | 1                        |
| 14780056  | 1.63                  | 2                        | 1.64                  | 2                        | 1.59                  | 2                        | 1.62                  | 2                        |
| 14780058  | 1.00                  | 1                        | 1.13                  | 1                        | 1.17                  | 1                        | 1.10                  | 1                        |
| 14780066  | 2.84                  | 3                        | 3.07                  | 3                        | 3.68                  | 4                        | 3.20                  | 3                        |

| Sample ID | Copy Number           |                          |                       |                          |                       |                          |                       |                          |
|-----------|-----------------------|--------------------------|-----------------------|--------------------------|-----------------------|--------------------------|-----------------------|--------------------------|
|           | r = 1                 |                          | r = 2                 |                          | r = 3                 |                          | Average               |                          |
|           | Ratio<br>(target/ref) | Estimated<br>Copy Number |
| 14780072  | 1.09                  | 1                        | 1.36                  | 1                        | 1.08                  | 1                        | 1.18                  | 1                        |
| 14780075  | 2.72                  | 3                        | 2.42                  | 2                        | 2.68                  | 3                        | 2.61                  | 3                        |
| 14780076  | 1.49                  | 1                        | 1.62                  | 2                        | 1.45                  | 1                        | 1.52                  | 2                        |
| 14780080  | 1.21                  | 1                        | 1.33                  | 1                        | 1.35                  | 1                        | 1.30                  | 1                        |
| 14780089  | 1.90                  | 2                        | 3.90                  | 4                        | 2.06                  | 2                        | 2.62                  | 3                        |
| 14780090  | 1.11                  | 1                        | 1.21                  | 1                        | 1.32                  | 1                        | 1.21                  | 1                        |
| 14780091  | 1.07                  | 1                        | 1.47                  | 1                        | 1.19                  | 1                        | 1.25                  | 1                        |
| 14780096  | 1.09                  | 1                        | 1.14                  | 1                        | 1.29                  | 1                        | 1.17                  | 1                        |
| 14780107  | 0.98                  | 1                        | 0.89                  | 1                        | 1.37                  | 1                        | 1.08                  | 1                        |
| 14780110  | 0.81                  | 1                        | 0.74                  | 1                        | 2.06                  | 2                        | 1.20                  | 1                        |
| 14780126  | 1.57                  | 2                        | 1.06                  | 1                        | 1.29                  | 1                        | 1.31                  | 1                        |
| 14780137  | 2.41                  | 2                        | 2.43                  | 2                        | 2.18                  | 2                        | 2.34                  | 2                        |
| 14780145  | 3.95                  | 4                        | 3.40                  | 3                        | 3.61                  | 4                        | 3.65                  | 4                        |
| 14780150  | 0.43                  | 0                        | 2.36                  | 2                        | 2.63                  | 3                        | 1.81                  | 2                        |
| 14780159  | 1.17                  | 1                        | 1.24                  | 1                        | 1.21                  | 1                        | 1.20                  | 1                        |
| 14780160  | 1.56                  | 2                        | 1.42                  | 1                        | 7.25                  | 7                        | 3.41                  | 3                        |
| 14780163  | 1.82                  | 2                        | 1.85                  | 2                        | 2.07                  | 2                        | 1.91                  | 2                        |
| 14780164  | 1.31                  | 1                        | 0.95                  | 1                        | 1.13                  | 1                        | 1.13                  | 1                        |
| 14780171  | 1.13                  | 1                        | 1.14                  | 1                        | 1.36                  | 1                        | 1.21                  | 1                        |

| Sample ID | Copy Number           |                          |                       |                          |                       |                          |                       |                          |
|-----------|-----------------------|--------------------------|-----------------------|--------------------------|-----------------------|--------------------------|-----------------------|--------------------------|
|           | r = 1                 |                          | r = 2                 |                          | r = 3                 |                          | Average               |                          |
|           | Ratio<br>(target/ref) | Estimated<br>Copy Number |
| 14780195  | 1.20                  | 1                        | 1.13                  | 1                        | 1.14                  | 1                        | 1.16                  | 1                        |
| 14780203  | 1.33                  | 1                        | 1.36                  | 1                        | 1.41                  | 1                        | 1.37                  | 1                        |
| 14780219  | 0.36                  | 0                        | 0.34                  | 0                        | 0.36                  | 0                        | 0.36                  | 0                        |
| 14780221  | 2.80                  | 3                        | 2.78                  | 3                        | 2.69                  | 3                        | 2.76                  | 3                        |
| 14780224  | 2.97                  | 3                        | 2.42                  | 2                        | 1.20                  | 1                        | 2.20                  | 2                        |
| 14790014  | 1.44                  | 1                        | 1.39                  | 1                        | 1.39                  | 1                        | 1.41                  | 1                        |
| 14790022  | 1.94                  | 2                        | 1.71                  | 2                        | 1.57                  | 2                        | 1.74                  | 2                        |
| 14790028  | 1.94                  | 2                        | 1.80                  | 2                        | 1.90                  | 2                        | 1.88                  | 2                        |
| 14790034  | 1.34                  | 1                        | 1.04                  | 1                        | 1.07                  | 1                        | 1.15                  | 1                        |
| 14790068  | 1.49                  | 1                        | 1.46                  | 1                        | 1.40                  | 1                        | 1.45                  | 1                        |
| 14790082  | 1.02                  | 1                        | 1.11                  | 1                        | 0.97                  | 1                        | 1.03                  | 1                        |
| 14790103  | 1.20                  | 1                        | 1.10                  | 1                        | 1.28                  | 1                        | 1.19                  | 1                        |
| 14790104  | 62.19                 | 62                       | 58.54                 | 59                       | 37.63                 | 38                       | 52.78                 | 53                       |
| 14790110  | 1.01                  | 1                        | 1.14                  | 1                        | 1.13                  | 1                        | 1.09                  | 1                        |
| 14790138  | 2.28                  | 2                        | 2.13                  | 2                        | 2.22                  | 2                        | 2.21                  | 2                        |
| 14790143  | 0.88                  | 1                        | 1.13                  | 1                        | 0.83                  | 1                        | 0.95                  | 1                        |
| 14790144  | 2.32                  | 2                        | 2.10                  | 2                        | 2.13                  | 2                        | 2.18                  | 2                        |
| 14790156  | 1.09                  | 1                        | 1.09                  | 1                        | 1.07                  | 1                        | 1.08                  | 1                        |
| 14790177  | 1.33                  | 1                        | 1.80                  | 2                        | 1.26                  | 1                        | 1.46                  | 1                        |

| Sample ID | Copy Number           |                          |                       |                          |                       |                          |                       |                          |
|-----------|-----------------------|--------------------------|-----------------------|--------------------------|-----------------------|--------------------------|-----------------------|--------------------------|
|           | r = 1                 |                          | r = 2                 |                          | r = 3                 |                          | Average               |                          |
|           | Ratio<br>(target/ref) | Estimated<br>Copy Number |
| 14790220  | 1.18                  | 1                        | 1.08                  | 1                        | 1.36                  | 1                        | 1.20                  | 1                        |
| 14790221  | 1.15                  | 1                        | 1.07                  | 1                        | 1.02                  | 1                        | 1.08                  | 1                        |
| 14790222  | 1.12                  | 1                        | 1.15                  | 1                        | 1.16                  | 1                        | 1.14                  | 1                        |
| 14790224  | 2.99                  | 3                        | 3.10                  | 3                        | 2.87                  | 3                        | 2.98                  | 3                        |
| 14790226  | 1.92                  | 2                        | 1.95                  | 2                        | 1.78                  | 2                        | 1.88                  | 2                        |
| 14790235  | 2.89                  | 3                        | 2.92                  | 3                        | 2.77                  | 3                        | 2.86                  | 3                        |
| 14790245  | 2.57                  | 3                        | 2.64                  | 3                        | 2.59                  | 3                        | 2.60                  | 3                        |
| 14790290  | 1.06                  | 1                        | 1.15                  | 1                        | 0.99                  | 1                        | 1.06                  | 1                        |
| 14790292  | 1.98                  | 2                        | 2.04                  | 2                        | 2.30                  | 2                        | 2.10                  | 2                        |
| 14790302  | 1.60                  | 2                        | 1.56                  | 2                        | 1.34                  | 1                        | 1.50                  | 1                        |
| 14790313  | 2.66                  | 3                        | 2.60                  | 3                        | 2.31                  | 2                        | 2.52                  | 3                        |
| 14790324  | 1.33                  | 1                        | 1.36                  | 1                        | 1.26                  | 1                        | 1.32                  | 1                        |
| 14790331  | 1.37                  | 1                        | 1.42                  | 1                        | 1.40                  | 1                        | 1.39                  | 1                        |
| 14790336  | 2.12                  | 2                        | 1.84                  | 2                        | 1.81                  | 2                        | 1.92                  | 2                        |
| 14790342  | 1.79                  | 2                        | 2.12                  | 2                        | 2.19                  | 2                        | 2.03                  | 2                        |
| 14790343  | 1.26                  | 1                        | 1.22                  | 1                        | 0.83                  | 1                        | 1.10                  | 1                        |
| 14790348  | 2.26                  | 2                        | 2.23                  | 2                        | 2.17                  | 2                        | 2.22                  | 2                        |
| 14790349  | 2.34                  | 2                        | 2.14                  | 2                        | 2.20                  | 2                        | 2.22                  | 2                        |
| 14790359  | 2.58                  | 3                        | 2.60                  | 3                        | 2.65                  | 3                        | 2.61                  | 3                        |

| Sample ID | Copy Number           |                          |                       |                          |                       |                          |                       |                          |
|-----------|-----------------------|--------------------------|-----------------------|--------------------------|-----------------------|--------------------------|-----------------------|--------------------------|
|           | r = 1                 |                          | r = 2                 |                          | r = 3                 |                          | Average               |                          |
|           | Ratio<br>(target/ref) | Estimated<br>Copy Number |
| 14790364  | 1.13                  | 1                        | 1.11                  | 1                        | 0.97                  | 1                        | 1.07                  | 1                        |
| 14790365  | 1.16                  | 1                        | 1.23                  | 1                        | 1.20                  | 1                        | 1.20                  | 1                        |
| 14790368  | 0.18                  | 0                        | 0.21                  | 0                        | 0.23                  | 0                        | 0.21                  | 0                        |
| 14790369  | 2.72                  | 3                        | 2.69                  | 3                        | 3.74                  | 4                        | 3.05                  | 3                        |
| 14790372  | 1.16                  | 1                        | 1.13                  | 1                        | 1.09                  | 1                        | 1.13                  | 1                        |
| 14790373  | 1.21                  | 1                        | 1.09                  | 1                        | 0.98                  | 1                        | 1.09                  | 1                        |
| 14790375  | 1.38                  | 1                        | 1.39                  | 1                        | 1.35                  | 1                        | 1.37                  | 1                        |
| 14790378  | 1.66                  | 2                        | 1.82                  | 2                        | 1.81                  | 2                        | 1.77                  | 2                        |
| 14790381  | 1.05                  | 1                        | 1.11                  | 1                        | 1.07                  | 1                        | 1.08                  | 1                        |
| 14790382  | 1.01                  | 1                        | 0.98                  | 1                        | 1.05                  | 1                        | 1.01                  | 1                        |
| 14790388  | 1.29                  | 1                        | 1.41                  | 1                        | 1.53                  | 2                        | 1.41                  | 1                        |
| 14790390  | 1.55                  | 2                        | 1.24                  | 1                        | 1.43                  | 1                        | 1.40                  | 1                        |
| 14790393  | 0.34                  | 0                        | 1.77                  | 2                        | 1.22                  | 1                        | 1.11                  | 1                        |
| 14790394  | 1.71                  | 2                        | 1.17                  | 1                        | 1.60                  | 2                        | 1.49                  | 1                        |
| 14790395  | 2.19                  | 2                        | 2.16                  | 2                        | 1.50                  | 2                        | 1.95                  | 2                        |
| 14790396  | 1.47                  | 1                        | 1.37                  | 1                        | 1.43                  | 1                        | 1.42                  | 1                        |
| 14790398  | 1.30                  | 1                        | 1.26                  | 1                        | 1.21                  | 1                        | 1.26                  | 1                        |
| 14790404  | 1.35                  | 1                        | 1.30                  | 1                        | 1.28                  | 1                        | 1.31                  | 1                        |
| 14790406  | 1.60                  | 2                        | 1.47                  | 1                        | 1.40                  | 1                        | 1.49                  | 1                        |

| Sample ID | Copy Number           |                          |                       |                          |                       |                          |                       |                          |
|-----------|-----------------------|--------------------------|-----------------------|--------------------------|-----------------------|--------------------------|-----------------------|--------------------------|
|           | r = 1                 |                          | r = 2                 |                          | r = 3                 |                          | Average               |                          |
|           | Ratio<br>(target/ref) | Estimated<br>Copy Number |
| 14790408  | 1.45                  | 1                        | 1.69                  | 2                        | 1.56                  | 2                        | 1.57                  | 2                        |
| 14790410  | 3.24                  | 3                        | 3.29                  | 3                        | 3.30                  | 3                        | 3.28                  | 3                        |
| 14790411  | 2.75                  | 3                        | 3.11                  | 3                        | 3.20                  | 3                        | 3.02                  | 3                        |
| 14790412  | 2.09                  | 2                        | 2.17                  | 2                        | 2.41                  | 2                        | 2.22                  | 2                        |
| 14790413  | 2.20                  | 2                        | 2.37                  | 2                        | 2.33                  | 2                        | 2.30                  | 2                        |
| 14790414  | 2.19                  | 2                        | 2.06                  | 2                        | 1.93                  | 2                        | 2.06                  | 2                        |
| 14790416  | 1.31                  | 1                        | 1.41                  | 1                        | 1.48                  | 1                        | 1.40                  | 1                        |
| 14790422  | 2.89                  | 3                        | 2.82                  | 3                        | 2.76                  | 3                        | 2.83                  | 3                        |
| 14790423  | 2.06                  | 2                        | 2.21                  | 2                        | 2.13                  | 2                        | 2.13                  | 2                        |
| 14790444  | 1.04                  | 1                        | 1.14                  | 1                        | 1.06                  | 1                        | 1.08                  | 1                        |
| 14790445  | 2.32                  | 2                        | 2.27                  | 2                        | 2.09                  | 2                        | 2.23                  | 2                        |
| 14790460  | 10.55                 | 11                       | 11.62                 | 12                       | 9.84                  | 10                       | 10.67                 | 11                       |
| 14790463  | 1.16                  | 1                        | 1.10                  | 1                        | 1.27                  | 1                        | 1.18                  | 1                        |
| 14790466  | 0.94                  | 1                        | 1.02                  | 1                        | 0.95                  | 1                        | 0.97                  | 1                        |
| 14790483  | 1.28                  | 1                        | 1.23                  | 1                        | 1.22                  | 1                        | 1.24                  | 1                        |
| 14790495  | 1.68                  | 2                        | 1.42                  | 1                        | 1.17                  | 1                        | 1.43                  | 1                        |
| 14790496  | 2.58                  | 3                        | 2.44                  | 2                        | 2.14                  | 2                        | 2.39                  | 2                        |
| 14790497  | 1.92                  | 2                        | 2.18                  | 2                        | 1.85                  | 2                        | 1.98                  | 2                        |
| 14790498  | 1.09                  | 1                        | 1.31                  | 1                        | 1.13                  | 1                        | 1.17                  | 1                        |



| Sample ID | Copy Number           |                          |                       |                          |                       |                          |                       |                          |
|-----------|-----------------------|--------------------------|-----------------------|--------------------------|-----------------------|--------------------------|-----------------------|--------------------------|
|           | r = 1                 |                          | r = 2                 |                          | r = 3                 |                          | Average               |                          |
|           | Ratio<br>(target/ref) | Estimated<br>Copy Number |
| 14790500  | 1.03                  | 1                        | 1.35                  | 1                        | 1.04                  | 1                        | 1.14                  | 1                        |
| 14790502  | 5.97                  | 6                        | 5.21                  | 5                        | 4.88                  | 5                        | 5.36                  | 5                        |
| 14790503  | 0.88                  | 1                        | 1.10                  | 1                        | 1.28                  | 1                        | 1.09                  | 1                        |
| 14790504  | 0.94                  | 1                        | 1.14                  | 1                        | 1.04                  | 1                        | 1.04                  | 1                        |
| 14790505  | 0.48                  | 0                        | 0.53                  | 1                        | 0.47                  | 0                        | 0.49                  | 0                        |
| 14790506  | 1.89                  | 2                        | 1.99                  | 2                        | 1.67                  | 2                        | 1.85                  | 2                        |
| 14790508  | 2.78                  | 3                        | 2.93                  | 3                        | 2.46                  | 2                        | 2.72                  | 3                        |
| 14790511  | 1.40                  | 1                        | 1.27                  | 1                        | 1.23                  | 1                        | 1.30                  | 1                        |
| 14790512  | 2.12                  | 2                        | 2.21                  | 2                        | 2.06                  | 2                        | 2.13                  | 2                        |
| 14790513  | 2.07                  | 2                        | 1.65                  | 2                        | 1.68                  | 2                        | 1.80                  | 2                        |
| 14790515  | 2.99                  | 3                        | 2.88                  | 3                        | 2.98                  | 3                        | 2.95                  | 3                        |
| 14790517  | 2.24                  | 2                        | 2.06                  | 2                        | 2.12                  | 2                        | 2.14                  | 2                        |
| 14790518  | 1.92                  | 2                        | 1.96                  | 2                        | 1.88                  | 2                        | 1.92                  | 2                        |
| 14790519  | 1.05                  | 1                        | 0.83                  | 1                        | 0.97                  | 1                        | 0.95                  | 1                        |
| 14790520  | 1.54                  | 2                        | 1.90                  | 2                        | 1.91                  | 2                        | 1.79                  | 2                        |
| 14790521  | 0.91                  | 1                        | 1.11                  | 1                        | 1.27                  | 1                        | 1.10                  | 1                        |
| 14790523  | 1.63                  | 2                        | 1.84                  | 2                        | 1.58                  | 2                        | 1.69                  | 2                        |
| 14790528  | 1.22                  | 1                        | 1.00                  | 1                        | 1.18                  | 1                        | 1.13                  | 1                        |
| 14790529  | 1.52                  | 2                        | 1.62                  | 2                        | 1.58                  | 2                        | 1.58                  | 2                        |

| Sample ID | Copy Number           |                          |                       |                          |                       |                          |                       |                          |
|-----------|-----------------------|--------------------------|-----------------------|--------------------------|-----------------------|--------------------------|-----------------------|--------------------------|
|           | r = 1                 |                          | r = 2                 |                          | r = 3                 |                          | Average               |                          |
|           | Ratio<br>(target/ref) | Estimated<br>Copy Number |
| 14790530  | 2.00                  | 2                        | 1.66                  | 2                        | 2.05                  | 2                        | 1.91                  | 2                        |
| 14790534  | 1.92                  | 2                        | 2.17                  | 2                        | 1.91                  | 2                        | 2.00                  | 2                        |
| 14790535  | 0.96                  | 1                        | 1.14                  | 1                        | 0.91                  | 1                        | 1.00                  | 1                        |
| 14790543  | 4.29                  | 4                        | 4.61                  | 5                        | 4.66                  | 5                        | 4.52                  | 5                        |
| 14790554  | 0.95                  | 1                        | 0.91                  | 1                        | 0.95                  | 1                        | 0.94                  | 1                        |
| 14790556  | 1.08                  | 1                        | 1.30                  | 1                        | 0.65                  | 1                        | 1.01                  | 1                        |
| 14790561  | 3.83                  | 4                        | 4.35                  | 4                        | 5.33                  | 5                        | 4.50                  | 5                        |
| 14790574  | 0.92                  | 1                        | 0.96                  | 1                        | 1.29                  | 1                        | 1.06                  | 1                        |
| 14790575  | 1.29                  | 1                        | 1.13                  | 1                        | 1.00                  | 1                        | 1.14                  | 1                        |
| 14790577  | 8.01                  | 8                        | 9.57                  | 10                       | 8.48                  | 8                        | 8.69                  | 9                        |
| 14790578  | 7.46                  | 7                        | 9.47                  | 9                        | 8.86                  | 9                        | 8.60                  | 9                        |
| 14790580  | 1.45                  | 1                        | 1.43                  | 1                        | 1.41                  | 1                        | 1.43                  | 1                        |
| 14790581  | 2.16                  | 2                        | 2.04                  | 2                        | 2.09                  | 2                        | 2.10                  | 2                        |
| 14790583  | 1.82                  | 2                        | 2.67                  | 3                        | 1.97                  | 2                        | 2.15                  | 2                        |
| 14790590  | 2.70                  | 3                        | 2.80                  | 3                        | 2.96                  | 3                        | 2.82                  | 3                        |
| 14790591  | 2.35                  | 2                        | 2.28                  | 2                        | 2.26                  | 2                        | 2.30                  | 2                        |
| 14790594  | 1.57                  | 2                        | 1.42                  | 1                        | 1.98                  | 2                        | 1.66                  | 2                        |
| 14790595  | 0.93                  | 1                        | 1.15                  | 1                        | 1.01                  | 1                        | 1.03                  | 1                        |
| 14790597  | 1.98                  | 2                        | 2.45                  | 2                        | 1.98                  | 2                        | 2.14                  | 2                        |

| Sample ID | Copy Number           |                          |                       |                          |                       |                          |                       |                          |
|-----------|-----------------------|--------------------------|-----------------------|--------------------------|-----------------------|--------------------------|-----------------------|--------------------------|
|           | r = 1                 |                          | r = 2                 |                          | r = 3                 |                          | Average               |                          |
|           | Ratio<br>(target/ref) | Estimated<br>Copy Number |
| 14790601  | 1.23                  | 1                        | 1.20                  | 1                        | 1.28                  | 1                        | 1.24                  | 1                        |
| 14790605  | 1.24                  | 1                        | 1.04                  | 1                        | 1.32                  | 1                        | 1.20                  | 1                        |
| 14790612  | 0.38                  | 0                        | 0.46                  | 0                        | 0.46                  | 0                        | 0.43                  | 0                        |
| 14790615  | 0.95                  | 1                        | 1.09                  | 1                        | 1.31                  | 1                        | 1.12                  | 1                        |
| 14790619  | 0.70                  | 1                        | 0.76                  | 1                        | 0.75                  | 1                        | 0.74                  | 1                        |
| 14790629  | 0.52                  | 1                        | 0.52                  | 1                        | 0.49                  | 0                        | 0.51                  | 1                        |
| 14790630  | 1.95                  | 2                        | 2.09                  | 2                        | 2.03                  | 2                        | 2.03                  | 2                        |
| 14790632  | 0.94                  | 1                        | 0.99                  | 1                        | 1.07                  | 1                        | 1.00                  | 1                        |
| 14790633  | 1.28                  | 1                        | 1.10                  | 1                        | 1.00                  | 1                        | 1.13                  | 1                        |
| 14790634  | 1.41                  | 1                        | 1.58                  | 2                        | 1.55                  | 2                        | 1.52                  | 2                        |
| 14790635  | 1.77                  | 2                        | 1.76                  | 2                        | 1.80                  | 2                        | 1.78                  | 2                        |
| 14790637  | 1.61                  | 2                        | 1.41                  | 1                        | 1.48                  | 1                        | 1.50                  | 2                        |
| 14790638  | 2.11                  | 2                        | 2.49                  | 2                        | 2.25                  | 2                        | 2.29                  | 2                        |
| 14790640  | 1.57                  | 2                        | 1.66                  | 2                        | 1.71                  | 2                        | 1.65                  | 2                        |
| 14790641  | 1.75                  | 2                        | 1.96                  | 2                        | 1.97                  | 2                        | 1.89                  | 2                        |
| 14790642  | 2.24                  | 2                        | 2.62                  | 3                        | 2.63                  | 3                        | 2.50                  | 2                        |
| 14790643  | 8.87                  | 9                        | 8.75                  | 9                        | 10.47                 | 10                       | 9.36                  | 9                        |
| 14790645  | 1.51                  | 2                        | 1.48                  | 1                        | 1.38                  | 1                        | 1.45                  | 1                        |
| 14790646  | 1.50                  | 2                        | 1.41                  | 1                        | 1.37                  | 1                        | 1.43                  | 1                        |

| Sample ID | Copy Number           |                          |                       |                          |                       |                          |                       |                          |
|-----------|-----------------------|--------------------------|-----------------------|--------------------------|-----------------------|--------------------------|-----------------------|--------------------------|
|           | r = 1                 |                          | r = 2                 |                          | r = 3                 |                          | Average               |                          |
|           | Ratio<br>(target/ref) | Estimated<br>Copy Number |
| 14790647  | 3.11                  | 3                        | 3.05                  | 3                        | 3.11                  | 3                        | 3.09                  | 3                        |
| 14790648  | 1.56                  | 2                        | 1.38                  | 1                        | 1.54                  | 2                        | 1.49                  | 1                        |
| 14790649  | 3.34                  | 3                        | 3.45                  | 3                        | 3.42                  | 3                        | 3.40                  | 3                        |
| 14790650  | 6.85                  | 7                        | 6.53                  | 7                        | 5.99                  | 6                        | 6.46                  | 6                        |
| 14790655  | 1.37                  | 1                        | 1.00                  | 1                        | 1.35                  | 1                        | 1.24                  | 1                        |
| 14790658  | 3.45                  | 3                        | 3.14                  | 3                        | 3.20                  | 3                        | 3.26                  | 3                        |
| 14790661  | 1.23                  | 1                        | 1.08                  | 1                        | 1.12                  | 1                        | 1.14                  | 1                        |
| 14790662  | 2.13                  | 2                        | 1.57                  | 2                        | 1.28                  | 1                        | 1.66                  | 2                        |
| 14790664  | 0.95                  | 1                        | 1.30                  | 1                        | 1.21                  | 1                        | 1.15                  | 1                        |
| 14790667  | 6.39                  | 6                        | 5.64                  | 6                        | 5.44                  | 5                        | 5.82                  | 6                        |
| 14790670  | 2.74                  | 3                        | 2.00                  | 2                        | 2.45                  | 2                        | 2.40                  | 2                        |
| 14790672  | 1.33                  | 1                        | 1.55                  | 2                        | 1.55                  | 2                        | 1.48                  | 1                        |
| 14790673  | 2.15                  | 2                        | 2.53                  | 3                        | 2.47                  | 2                        | 2.39                  | 2                        |
| 14790675  | 2.13                  | 2                        | 2.10                  | 2                        | 2.08                  | 2                        | 2.10                  | 2                        |
| 14790676  | 19.90                 | 20                       | 18.06                 | 18                       | 16.93                 | 17                       | 18.30                 | 18                       |
| 14790677  | 2.65                  | 3                        | 2.47                  | 2                        | 2.30                  | 2                        | 2.47                  | 2                        |
| 14790678  | 5.13                  | 5                        | 4.81                  | 5                        | 5.78                  | 6                        | 5.24                  | 5                        |
| 14790679  | 2.61                  | 3                        | 3.54                  | 4                        | 2.98                  | 3                        | 3.04                  | 3                        |
| 14790680  | 1.77                  | 2                        | 1.77                  | 2                        | 1.90                  | 2                        | 1.81                  | 2                        |

| Sample ID | Copy Number           |                          |                       |                          |                       |                          |                       |                          |
|-----------|-----------------------|--------------------------|-----------------------|--------------------------|-----------------------|--------------------------|-----------------------|--------------------------|
|           | r = 1                 |                          | r = 2                 |                          | r = 3                 |                          | Average               |                          |
|           | Ratio<br>(target/ref) | Estimated<br>Copy Number |
| 14790682  | 1.56                  | 2                        | 1.53                  | 2                        | 1.32                  | 1                        | 1.47                  | 1                        |
| 14790684  | 2.52                  | 3                        | 2.09                  | 2                        | 2.00                  | 2                        | 2.20                  | 2                        |
| 14790685  | 4.22                  | 4                        | 3.83                  | 4                        | 3.83                  | 4                        | 3.96                  | 4                        |
| 14790686  | 1.15                  | 1                        | 0.07                  | 0                        | 1.13                  | 1                        | 0.78                  | 1                        |
| 14790687  | 1.12                  | 1                        | 1.17                  | 1                        | 0.97                  | 1                        | 1.08                  | 1                        |
| 14790689  | 2.28                  | 2                        | 2.35                  | 2                        | 2.09                  | 2                        | 2.24                  | 2                        |
| 14790691  | 1.94                  | 2                        | 2.09                  | 2                        | 2.48                  | 2                        | 2.17                  | 2                        |
| 14790692  | 4.22                  | 4                        | 3.69                  | 4                        | 5.29                  | 5                        | 4.40                  | 4                        |
| 14790696  | 2.02                  | 2                        | 1.87                  | 2                        | 2.01                  | 2                        | 1.97                  | 2                        |
| 14790698  | 1.73                  | 2                        | 1.10                  | 1                        | 1.70                  | 2                        | 1.51                  | 2                        |
| 14790699  | 1.49                  | 1                        | 1.63                  | 2                        | 1.41                  | 1                        | 1.51                  | 2                        |
| 14790700  | 1.33                  | 1                        | 1.30                  | 1                        | 1.27                  | 1                        | 1.30                  | 1                        |
| 14790701  | 0.66                  | 1                        | 0.63                  | 1                        | 0.57                  | 1                        | 0.62                  | 1                        |
| 14790702  | 0.79                  | 1                        | 0.84                  | 1                        | 0.71                  | 1                        | 0.78                  | 1                        |
| 14790704  | 1.14                  | 1                        | 1.09                  | 1                        | 1.04                  | 1                        | 1.09                  | 1                        |
| 14790705  | 1.88                  | 2                        | 1.92                  | 2                        | 1.83                  | 2                        | 1.88                  | 2                        |
| 14790712  | 3.02                  | 3                        | 2.70                  | 3                        | 2.74                  | 3                        | 2.82                  | 3                        |
| 14790715  | 0.41                  | 0                        | 0.40                  | 0                        | 0.48                  | 0                        | 0.43                  | 0                        |
| 14790716  | 2.55                  | 3                        | 2.64                  | 3                        | 2.68                  | 3                        | 2.62                  | 3                        |

| Sample ID | Copy Number           |                          |                       |                          |                       |                          |                       |                          |
|-----------|-----------------------|--------------------------|-----------------------|--------------------------|-----------------------|--------------------------|-----------------------|--------------------------|
|           | r = 1                 |                          | r = 2                 |                          | r = 3                 |                          | Average               |                          |
|           | Ratio<br>(target/ref) | Estimated<br>Copy Number |
| 14790717  | 1.99                  | 2                        | 2.24                  | 2                        | 1.91                  | 2                        | 2.05                  | 2                        |
| 14790718  | 2.44                  | 2                        | 2.44                  | 2                        | 2.18                  | 2                        | 2.36                  | 2                        |
| 14790719  | 2.71                  | 3                        | 2.66                  | 3                        | 2.61                  | 3                        | 2.66                  | 3                        |
| 14790720  | 2.82                  | 3                        | 2.65                  | 3                        | 2.64                  | 3                        | 2.70                  | 3                        |
| 14790721  | 2.90                  | 3                        | 2.93                  | 3                        | 2.87                  | 3                        | 2.90                  | 3                        |
| 14790722  | 2.72                  | 3                        | 2.86                  | 3                        | 2.76                  | 3                        | 2.78                  | 3                        |
| 14790723  | 1.11                  | 1                        | 1.12                  | 1                        | 1.10                  | 1                        | 1.11                  | 1                        |
| 14790730  | 1.04                  | 1                        | 1.00                  | 1                        | 1.07                  | 1                        | 1.04                  | 1                        |
| 14790736  | 2.18                  | 2                        | 2.32                  | 2                        | 2.32                  | 2                        | 2.27                  | 2                        |
| 14790738  | 2.36                  | 2                        | 2.20                  | 2                        | 2.15                  | 2                        | 2.24                  | 2                        |
| 14790740  | 4.42                  | 4                        | 5.20                  | 5                        | 5.73                  | 6                        | 5.12                  | 5                        |
| 14790741  | 5.32                  | 5                        | 5.59                  | 6                        | 6.60                  | 7                        | 5.84                  | 6                        |
| 14790743  | 1.17                  | 1                        | 1.18                  | 1                        | 1.06                  | 1                        | 1.14                  | 1                        |
| 14790744  | 1.07                  | 1                        | 1.29                  | 1                        | 1.07                  | 1                        | 1.14                  | 1                        |
| 14790745  | 1.13                  | 1                        | 1.06                  | 1                        | 1.03                  | 1                        | 1.07                  | 1                        |
| 14790746  | 1.89                  | 2                        | 1.79                  | 2                        | 1.65                  | 2                        | 1.77                  | 2                        |
| 14790747  | 2.03                  | 2                        | 2.32                  | 2                        | 2.11                  | 2                        | 2.15                  | 2                        |
| 14790748  | 3.15                  | 3                        | 3.07                  | 3                        | 3.12                  | 3                        | 3.11                  | 3                        |
| 14790749  | 2.61                  | 3                        | 2.69                  | 3                        | 2.66                  | 3                        | 2.65                  | 3                        |

| Sample ID | Copy Number           |                          |                       |                          |                       |                          |                       |                          |
|-----------|-----------------------|--------------------------|-----------------------|--------------------------|-----------------------|--------------------------|-----------------------|--------------------------|
|           | r = 1                 |                          | r = 2                 |                          | r = 3                 |                          | Average               |                          |
|           | Ratio<br>(target/ref) | Estimated<br>Copy Number |
| 14790750  | 2.67                  | 3                        | 2.60                  | 3                        | 2.75                  | 3                        | 2.67                  | 3                        |
| 14790751  | 3.82                  | 4                        | 4.04                  | 4                        | 4.72                  | 5                        | 4.19                  | 4                        |
| 14790754  | 1.48                  | 1                        | 2.00                  | 2                        | 1.68                  | 2                        | 1.72                  | 2                        |
| 14790755  | 3.64                  | 4                        | 3.96                  | 4                        | 3.41                  | 3                        | 3.67                  | 4                        |
| 14790757  | 1.79                  | 2                        | 1.49                  | 1                        | 1.58                  | 2                        | 1.62                  | 2                        |
| 14790758  | 1.07                  | 1                        | 1.55                  | 2                        | 1.44                  | 1                        | 1.36                  | 1                        |
| 14790759  | 3.65                  | 4                        | 3.94                  | 4                        | 3.78                  | 4                        | 3.79                  | 4                        |
| 14790760  | 3.18                  | 3                        | 3.70                  | 4                        | 3.13                  | 3                        | 3.33                  | 3                        |
| 14790761  | 1.93                  | 2                        | 2.68                  | 3                        | 1.97                  | 2                        | 2.19                  | 2                        |
| 14790762  | 5.18                  | 5                        | 5.54                  | 6                        | 5.33                  | 5                        | 5.35                  | 5                        |
| 14790763  | 3.41                  | 3                        | 3.83                  | 4                        | 3.77                  | 4                        | 3.67                  | 4                        |
| 14790764  | 3.23                  | 3                        | 3.25                  | 3                        | 3.49                  | 3                        | 3.32                  | 3                        |
| 14790765  | 3.12                  | 3                        | 3.24                  | 3                        | 3.58                  | 4                        | 3.31                  | 3                        |
| 14790766  | 1.47                  | 1                        | 1.37                  | 1                        | 1.51                  | 2                        | 1.45                  | 1                        |
| 14790767  | 1.46                  | 1                        | 1.36                  | 1                        | 1.63                  | 2                        | 1.49                  | 1                        |
| 14790768  | 1.38                  | 1                        | 0.05                  | 0                        | 1.84                  | 2                        | 1.09                  | 1                        |
| 14790769  | 1.80                  | 2                        | 1.86                  | 2                        | 1.43                  | 1                        | 1.70                  | 2                        |
| 14790770  | 3.75                  | 4                        | 3.51                  | 4                        | 4.45                  | 4                        | 3.90                  | 4                        |
| 14790771  | 2.79                  | 3                        | 3.13                  | 3                        | 2.79                  | 3                        | 2.90                  | 3                        |

| Sample ID | Copy Number           |                          |                       |                          |                       |                          |                       |                          |
|-----------|-----------------------|--------------------------|-----------------------|--------------------------|-----------------------|--------------------------|-----------------------|--------------------------|
|           | r = 1                 |                          | r = 2                 |                          | r = 3                 |                          | Average               |                          |
|           | Ratio<br>(target/ref) | Estimated<br>Copy Number |
| 14790773  | 1.78                  | 2                        | 1.93                  | 2                        | 1.85                  | 2                        | 1.85                  | 2                        |
| 14790774  | 4.80                  | 5                        | 4.83                  | 5                        | 6.03                  | 6                        | 5.22                  | 5                        |
| 14790775  | 5.08                  | 5                        | 5.97                  | 6                        | 6.62                  | 7                        | 5.89                  | 6                        |
| 14790779  | 4.99                  | 5                        | 4.91                  | 5                        | 4.44                  | 4                        | 4.78                  | 5                        |
| 14790780  | 2.51                  | 3                        | 2.40                  | 2                        | 1.84                  | 2                        | 2.25                  | 2                        |
| 14790781  | 4.12                  | 4                        | 3.58                  | 4                        | 3.72                  | 4                        | 3.81                  | 4                        |
| 14790785  | 1.59                  | 2                        | 1.83                  | 2                        | 1.67                  | 2                        | 1.70                  | 2                        |
| 14790790  | 2.63                  | 3                        | 2.32                  | 2                        | 2.53                  | 3                        | 2.49                  | 2                        |
| 14790792  | 2.95                  | 3                        | 2.61                  | 3                        | 2.42                  | 2                        | 2.66                  | 3                        |
| 14790794  | 3.93                  | 4                        | 3.69                  | 4                        | 4.60                  | 5                        | 4.07                  | 4                        |
| 14790797  | 7.34                  | 7                        | 3.64                  | 4                        | 3.00                  | 3                        | 4.66                  | 5                        |
| 14790800  | 3.64                  | 4                        | 3.10                  | 3                        | 3.38                  | 3                        | 3.37                  | 3                        |
| 14790803  | 3.11                  | 3                        | 2.48                  | 2                        | 2.74                  | 3                        | 2.77                  | 3                        |
| 14790804  | 2.16                  | 2                        | 3.70                  | 4                        | 2.49                  | 2                        | 2.78                  | 3                        |
| 14790805  | 2.86                  | 3                        | 1.77                  | 2                        | 3.27                  | 3                        | 2.64                  | 3                        |
| 14790808  | 1.54                  | 2                        | 1.86                  | 2                        | 1.40                  | 1                        | 1.60                  | 2                        |
| 14790809  | 1.26                  | 1                        | 1.22                  | 1                        | 1.47                  | 1                        | 1.32                  | 1                        |
| 14790810  | 2.48                  | 2                        | 2.59                  | 3                        | 1.57                  | 2                        | 2.21                  | 2                        |
| 14790812  | 0.38                  | 0                        | 0.45                  | 0                        | 0.50                  | 1                        | 0.45                  | 0                        |



| Sample ID | Copy Number           |                          |                       |                          |                       |                          |                       |                          |
|-----------|-----------------------|--------------------------|-----------------------|--------------------------|-----------------------|--------------------------|-----------------------|--------------------------|
|           | r = 1                 |                          | r = 2                 |                          | r = 3                 |                          | Average               |                          |
|           | Ratio<br>(target/ref) | Estimated<br>Copy Number |
| 14790814  | 3.24                  | 3                        | 2.92                  | 3                        | 3.04                  | 3                        | 3.06                  | 3                        |
| 14790815  | 2.02                  | 2                        | 1.96                  | 2                        | 1.98                  | 2                        | 1.99                  | 2                        |
| 14790817  | 0.52                  | 1                        | 0.58                  | 1                        | 0.55                  | 1                        | 0.55                  | 1                        |
| 14790819  | 2.70                  | 3                        | 2.18                  | 2                        | 2.17                  | 2                        | 2.35                  | 2                        |
| 14790821  | 1.49                  | 1                        | 0.86                  | 1                        | 1.30                  | 1                        | 1.22                  | 1                        |
| 14790824  | 1.26                  | 1                        | 1.19                  | 1                        | 1.22                  | 1                        | 1.22                  | 1                        |
| 14790825  | 2.07                  | 2                        | 2.10                  | 2                        | 1.88                  | 2                        | 2.02                  | 2                        |
| 14790826  | 1.35                  | 1                        | 1.04                  | 1                        | 1.01                  | 1                        | 1.13                  | 1                        |
| 14790829  | 7.47                  | 7                        | 4.71                  | 5                        | 6.24                  | 6                        | 6.14                  | 6                        |
| 14790830  | 13.03                 | 13                       | 8.93                  | 9                        | 9.86                  | 10                       | 10.61                 | 11                       |
| 14790833  | 1.43                  | 1                        | 1.44                  | 1                        | 1.25                  | 1                        | 1.37                  | 1                        |
| 14790834  | 0.87                  | 1                        | 0.94                  | 1                        | 0.76                  | 1                        | 0.86                  | 1                        |
| 14790835  | 1.36                  | 1                        | 1.39                  | 1                        | 1.38                  | 1                        | 1.38                  | 1                        |
| 14790836  | 1.16                  | 1                        | 1.14                  | 1                        | 1.21                  | 1                        | 1.17                  | 1                        |
| 14790838  | 1.12                  | 1                        | 1.34                  | 1                        | 0.82                  | 1                        | 1.09                  | 1                        |
| 14790840  | 3.11                  | 3                        | 3.22                  | 3                        | 2.73                  | 3                        | 3.02                  | 3                        |
| 14790841  | 3.20                  | 3                        | 3.32                  | 3                        | 3.41                  | 3                        | 3.31                  | 3                        |
| 14790843  | 2.59                  | 3                        | 2.51                  | 3                        | 2.47                  | 2                        | 2.53                  | 3                        |
| 14790844  | 1.05                  | 1                        | 0.70                  | 1                        | 0.93                  | 1                        | 0.89                  | 1                        |

| Sample ID | Copy Number           |                          |                       |                          |                       |                          |                       |                          |
|-----------|-----------------------|--------------------------|-----------------------|--------------------------|-----------------------|--------------------------|-----------------------|--------------------------|
|           | r = 1                 |                          | r = 2                 |                          | r = 3                 |                          | Average               |                          |
|           | Ratio<br>(target/ref) | Estimated<br>Copy Number |
| 14790845  | 3.25                  | 3                        | 3.34                  | 3                        | 3.02                  | 3                        | 3.20                  | 3                        |
| 14790847  | 9.01                  | 9                        | 10.46                 | 10                       | 10.66                 | 11                       | 10.04                 | 10                       |
| 14790848  | 1.12                  | 1                        | 0.97                  | 1                        | 0.96                  | 1                        | 1.01                  | 1                        |
| 14790849  | 6.49                  | 6                        | 6.62                  | 7                        | 6.58                  | 7                        | 6.56                  | 7                        |
| 14790851  | 3.36                  | 3                        | 3.43                  | 3                        | 3.37                  | 3                        | 3.39                  | 3                        |
| 14790854  | 3.37                  | 3                        | 3.56                  | 4                        | 3.25                  | 3                        | 3.39                  | 3                        |
| 14790855  | 1.61                  | 2                        | 2.10                  | 2                        | 1.70                  | 2                        | 1.80                  | 2                        |
| 14790857  | 2.39                  | 2                        | 2.34                  | 2                        | 3.12                  | 3                        | 2.62                  | 3                        |
| 14790859  | 1.25                  | 1                        | 1.28                  | 1                        | 1.22                  | 1                        | 1.25                  | 1                        |
| 14790862  | 1.39                  | 1                        | 1.52                  | 2                        | 1.86                  | 2                        | 1.59                  | 2                        |
| 14790863  | 3.25                  | 3                        | 5.34                  | 5                        | 5.70                  | 6                        | 4.76                  | 5                        |
| 14790864  | 1.25                  | 1                        | 1.13                  | 1                        | 1.16                  | 1                        | 1.18                  | 1                        |
| 14790867  | 3.03                  | 3                        | 3.32                  | 3                        | 3.10                  | 3                        | 3.15                  | 3                        |
| 14790869  | 4.77                  | 5                        | 5.56                  | 6                        | 6.00                  | 6                        | 5.44                  | 5                        |
| 14790871  | 1.45                  | 1                        | 1.46                  | 1                        | 2.00                  | 2                        | 1.63                  | 2                        |
| 14790872  | 2.73                  | 3                        | 2.69                  | 3                        | 2.49                  | 2                        | 2.64                  | 3                        |
| 14790873  | 2.21                  | 2                        | 2.40                  | 2                        | 2.59                  | 3                        | 2.40                  | 2                        |
| 14790874  | 2.69                  | 3                        | 2.86                  | 3                        | 2.30                  | 2                        | 2.62                  | 3                        |
| 14790879  | 2.07                  | 2                        | 2.03                  | 2                        | 1.91                  | 2                        | 2.00                  | 2                        |

| Sample ID | Copy Number           |                          |                       |                          |                       |                          |                       |                          |
|-----------|-----------------------|--------------------------|-----------------------|--------------------------|-----------------------|--------------------------|-----------------------|--------------------------|
|           | r = 1                 |                          | r = 2                 |                          | r = 3                 |                          | Average               |                          |
|           | Ratio<br>(target/ref) | Estimated<br>Copy Number |
| 14790880  | 1.72                  | 2                        | 1.95                  | 2                        | 2.20                  | 2                        | 1.96                  | 2                        |
| 14790883  | 1.23                  | 1                        | 1.24                  | 1                        | 1.33                  | 1                        | 1.27                  | 1                        |
| 14790884  | 1.47                  | 1                        | 1.83                  | 2                        | 0.34                  | 0                        | 1.21                  | 1                        |
| 14790885  | 1.00                  | 1                        | 1.09                  | 1                        | 0.27                  | 0                        | 0.79                  | 1                        |
| 14790886  | 0.92                  | 1                        | 1.08                  | 1                        | 1.36                  | 1                        | 1.12                  | 1                        |
| 14790887  | 0.91                  | 1                        | 1.00                  | 1                        | 1.02                  | 1                        | 0.97                  | 1                        |
| 14790890  | 1.62                  | 2                        | 1.84                  | 2                        | 1.78                  | 2                        | 1.75                  | 2                        |
| 14790897  | 4.44                  | 4                        | 4.01                  | 4                        | 5.16                  | 5                        | 4.54                  | 5                        |
| 14790898  | 2.03                  | 2                        | 1.89                  | 2                        | 1.90                  | 2                        | 1.94                  | 2                        |
| 14790899  | 2.59                  | 3                        | 3.79                  | 4                        | 3.92                  | 4                        | 3.43                  | 3                        |
| 14790901  | 1.00                  | 1                        | 1.23                  | 1                        | 1.49                  | 1                        | 1.24                  | 1                        |
| 14790902  | 0.85                  | 1                        | 0.40                  | 0                        | 0.96                  | 1                        | 0.74                  | 1                        |
| 14790903  | 1.07                  | 1                        | 1.04                  | 1                        | 0.83                  | 1                        | 0.98                  | 1                        |
| 14790905  | 1.67                  | 2                        | 1.80                  | 2                        | 1.60                  | 2                        | 1.69                  | 2                        |
| 14790906  | 1.60                  | 2                        | 1.79                  | 2                        | 2.01                  | 2                        | 1.80                  | 2                        |
| 14790908  | 2.67                  | 3                        | 2.20                  | 2                        | 2.64                  | 3                        | 2.51                  | 3                        |
| 14790910  | 0.54                  | 1                        | 0.68                  | 1                        | 0.58                  | 1                        | 0.60                  | 1                        |
| 14790911  | 2.73                  | 3                        | 2.56                  | 3                        | 3.08                  | 3                        | 2.79                  | 3                        |
| 14790912  | 2.29                  | 2                        | 1.73                  | 2                        | 2.05                  | 2                        | 2.02                  | 2                        |

| Sample ID | Copy Number           |                          |                       |                          |                       |                          |                       |                          |
|-----------|-----------------------|--------------------------|-----------------------|--------------------------|-----------------------|--------------------------|-----------------------|--------------------------|
|           | r = 1                 |                          | r = 2                 |                          | r = 3                 |                          | Average               |                          |
|           | Ratio<br>(target/ref) | Estimated<br>Copy Number |
| 14790915  | 1.34                  | 1                        | 0.99                  | 1                        | 1.12                  | 1                        | 1.15                  | 1                        |
| 14790916  | 4.19                  | 4                        | 3.45                  | 3                        | 4.07                  | 4                        | 3.90                  | 4                        |
| 14790917  | 3.19                  | 3                        | 3.16                  | 3                        | 3.48                  | 3                        | 3.28                  | 3                        |
| 14790918  | 1.18                  | 1                        | 1.09                  | 1                        | 1.11                  | 1                        | 1.13                  | 1                        |
| 14790919  | 2.59                  | 3                        | 2.69                  | 3                        | 2.86                  | 3                        | 2.71                  | 3                        |
| 14790922  | 0.97                  | 1                        | 0.94                  | 1                        | 0.96                  | 1                        | 0.96                  | 1                        |
| 14790923  | 4.29                  | 4                        | 4.61                  | 5                        | 4.14                  | 4                        | 4.35                  | 4                        |
| 14790925  | 1.03                  | 1                        | 0.98                  | 1                        | 0.96                  | 1                        | 0.99                  | 1                        |
| 14790926  | 1.49                  | 1                        | 1.62                  | 2                        | 1.48                  | 1                        | 1.53                  | 2                        |
| 14790931  | 2.07                  | 2                        | 2.14                  | 2                        | 2.06                  | 2                        | 2.09                  | 2                        |
| 14790933  | 1.76                  | 2                        | 1.86                  | 2                        | 1.80                  | 2                        | 1.81                  | 2                        |
| 14790936  | 2.36                  | 2                        | 2.67                  | 3                        | 1.83                  | 2                        | 2.29                  | 2                        |
| 14790937  | 1.10                  | 1                        | 1.13                  | 1                        | 1.07                  | 1                        | 1.10                  | 1                        |
| 14790940  | 1.71                  | 2                        | 1.86                  | 2                        | 1.85                  | 2                        | 1.80                  | 2                        |
| 14790944  | 3.39                  | 3                        | 4.05                  | 4                        | 4.13                  | 4                        | 3.86                  | 4                        |
| 14790946  | 1.69                  | 2                        | 1.81                  | 2                        | 1.85                  | 2                        | 1.78                  | 2                        |
| 14790948  | 2.09                  | 2                        | 2.10                  | 2                        | 2.15                  | 2                        | 2.12                  | 2                        |
| 14790949  | 0.90                  | 1                        | 0.97                  | 1                        | 0.89                  | 1                        | 0.92                  | 1                        |
| 14790958  | 1.01                  | 1                        | 1.08                  | 1                        | 0.92                  | 1                        | 1.00                  | 1                        |

| Sample ID | Copy Number           |                          |                       |                          |                       |                          |                       |                          |
|-----------|-----------------------|--------------------------|-----------------------|--------------------------|-----------------------|--------------------------|-----------------------|--------------------------|
|           | r = 1                 |                          | r = 2                 |                          | r = 3                 |                          | Average               |                          |
|           | Ratio<br>(target/ref) | Estimated<br>Copy Number |
| 14790959  | 2.10                  | 2                        | 1.66                  | 2                        | 1.59                  | 2                        | 1.78                  | 2                        |
| 14790965  | 2.07                  | 2                        | 2.05                  | 2                        | 1.81                  | 2                        | 1.98                  | 2                        |
| 14790966  | 2.14                  | 2                        | 2.30                  | 2                        | 2.37                  | 2                        | 2.27                  | 2                        |
| 14790967  | 3.31                  | 3                        | 3.39                  | 3                        | 3.36                  | 3                        | 3.35                  | 3                        |
| 14790968  | 4.78                  | 5                        | 4.67                  | 5                        | 5.07                  | 5                        | 4.84                  | 5                        |
| 14790969  | 1.03                  | 1                        | 1.02                  | 1                        | 1.08                  | 1                        | 1.04                  | 1                        |
| 14790972  | 2.15                  | 2                        | 2.50                  | 3                        | 2.39                  | 2                        | 2.35                  | 2                        |
| 14790973  | 2.09                  | 2                        | 2.60                  | 3                        | 2.65                  | 3                        | 2.45                  | 2                        |
| 14790981  | 0.81                  | 1                        | 0.88                  | 1                        | 0.87                  | 1                        | 0.85                  | 1                        |
| 14790982  | 1.13                  | 1                        | 1.09                  | 1                        | 0.97                  | 1                        | 1.06                  | 1                        |
| 14790985  | 1.39                  | 1                        | 1.28                  | 1                        | 1.39                  | 1                        | 1.35                  | 1                        |
| 14790986  | 2.41                  | 2                        | 2.29                  | 2                        | 2.41                  | 2                        | 2.37                  | 2                        |
| 14790987  | 3.17                  | 3                        | 2.61                  | 3                        | 3.24                  | 3                        | 3.01                  | 3                        |
| 14790988  | 1.44                  | 1                        | 1.87                  | 2                        | 1.72                  | 2                        | 1.68                  | 2                        |
| 14791040  | 1.39                  | 1                        | 1.26                  | 1                        | 1.37                  | 1                        | 1.34                  | 1                        |
| 14791066  | 3.37                  | 3                        | 3.39                  | 3                        | 4.48                  | 4                        | 3.75                  | 4                        |
| 14791067  | 2.80                  | 3                        | 2.74                  | 3                        | 2.56                  | 3                        | 2.70                  | 3                        |
| 14791068  | 3.56                  | 4                        | 3.28                  | 3                        | 3.68                  | 4                        | 3.50                  | 4                        |
| 14791070  | 10.97                 | 11                       | 9.83                  | 10                       | 9.45                  | 9                        | 10.08                 | 10                       |

| Sample ID | Copy Number           |                          |                       |                          |                       |                          |                       |                          |
|-----------|-----------------------|--------------------------|-----------------------|--------------------------|-----------------------|--------------------------|-----------------------|--------------------------|
|           | r = 1                 |                          | r = 2                 |                          | r = 3                 |                          | Average               |                          |
|           | Ratio<br>(target/ref) | Estimated<br>Copy Number |
| 14791071  | 1.48                  | 1                        | 1.37                  | 1                        | 1.48                  | 1                        | 1.44                  | 1                        |
| 14791072  | 1.30                  | 1                        | 1.56                  | 2                        | 1.17                  | 1                        | 1.34                  | 1                        |
| 14791073  | 4.94                  | 5                        | 2.10                  | 2                        | 4.27                  | 4                        | 3.77                  | 4                        |
| 14791075  | 3.52                  | 4                        | 3.48                  | 3                        | 3.53                  | 4                        | 3.51                  | 4                        |
| 14791076  | 1.40                  | 1                        | 1.70                  | 2                        | 1.66                  | 2                        | 1.59                  | 2                        |
| 14791077  | 1.45                  | 1                        | 1.58                  | 2                        | 1.65                  | 2                        | 1.56                  | 2                        |
| 14791079  | 2.35                  | 2                        | 2.55                  | 3                        | 2.66                  | 3                        | 2.52                  | 3                        |
| 14791080  | 1.30                  | 1                        | 1.43                  | 1                        | 1.51                  | 2                        | 1.41                  | 1                        |
| 14791082  | 2.39                  | 2                        | 1.77                  | 2                        | 1.81                  | 2                        | 1.99                  | 2                        |
| 14791083  | 2.25                  | 2                        | 5.63                  | 6                        | 2.58                  | 3                        | 3.49                  | 3                        |
| 14791085  | 1.15                  | 1                        | 1.56                  | 2                        | 1.59                  | 2                        | 1.44                  | 1                        |
| 14791088  | 1.20                  | 1                        | 1.23                  | 1                        | 1.31                  | 1                        | 1.25                  | 1                        |
| 14791089  | 1.92                  | 2                        | 1.75                  | 2                        | 1.84                  | 2                        | 1.84                  | 2                        |
| 14791090  | 5.96                  | 6                        | 5.09                  | 5                        | 5.02                  | 5                        | 5.36                  | 5                        |
| 14791091  | 3.65                  | 4                        | 3.35                  | 3                        | 3.36                  | 3                        | 3.45                  | 3                        |
| 14791093  | 2.79                  | 3                        | 2.60                  | 3                        | 2.42                  | 2                        | 2.60                  | 3                        |
| 14791095  | 2.80                  | 3                        | 2.71                  | 3                        | 2.45                  | 2                        | 2.65                  | 3                        |
| 14791097  | 4.89                  | 5                        | 4.91                  | 5                        | 4.71                  | 5                        | 4.84                  | 5                        |
| 14791098  | 2.73                  | 3                        | 2.74                  | 3                        | 2.53                  | 3                        | 2.67                  | 3                        |

| Sample ID | Copy Number           |                          |                       |                          |                       |                          |                       |                          |
|-----------|-----------------------|--------------------------|-----------------------|--------------------------|-----------------------|--------------------------|-----------------------|--------------------------|
|           | r = 1                 |                          | r = 2                 |                          | r = 3                 |                          | Average               |                          |
|           | Ratio<br>(target/ref) | Estimated<br>Copy Number |
| 14791101  | 5.94                  | 6                        | 5.66                  | 6                        | 6.14                  | 6                        | 5.91                  | 6                        |
| 14791102  | 6.73                  | 7                        | 6.37                  | 6                        | 6.93                  | 7                        | 6.68                  | 7                        |
| 14791106  | 1.87                  | 2                        | 2.02                  | 2                        | 2.05                  | 2                        | 1.98                  | 2                        |
| 14791107  | 2.00                  | 2                        | 1.97                  | 2                        | 2.11                  | 2                        | 2.03                  | 2                        |
| 14791109  | 1.32                  | 1                        | 1.41                  | 1                        | 1.38                  | 1                        | 1.37                  | 1                        |
| 14791110  | 2.36                  | 2                        | 2.36                  | 2                        | 2.26                  | 2                        | 2.33                  | 2                        |
| 14791111  | 11.11                 | 11                       | 10.08                 | 10                       | 10.32                 | 10                       | 10.50                 | 11                       |
| 14791112  | 1.19                  | 1                        | 1.24                  | 1                        | 1.27                  | 1                        | 1.23                  | 1                        |
| 14791113  | 1.18                  | 1                        | 1.33                  | 1                        | 1.34                  | 1                        | 1.28                  | 1                        |
| 14791114  | 1.07                  | 1                        | 1.08                  | 1                        | 1.11                  | 1                        | 1.09                  | 1                        |
| 14791115  | 1.42                  | 1                        | 1.19                  | 1                        | 1.18                  | 1                        | 1.27                  | 1                        |
| 14791116  | 2.28                  | 2                        | 2.77                  | 3                        | 2.36                  | 2                        | 2.47                  | 2                        |
| 14791118  | 1.29                  | 1                        | 1.38                  | 1                        | 1.37                  | 1                        | 1.35                  | 1                        |
| 14791119  | 1.28                  | 1                        | 1.32                  | 1                        | 1.30                  | 1                        | 1.30                  | 1                        |
| 14791120  | 1.69                  | 2                        | 1.53                  | 2                        | 1.53                  | 2                        | 1.58                  | 2                        |
| 14791122  | 1.26                  | 1                        | 0.97                  | 1                        | 1.06                  | 1                        | 1.10                  | 1                        |
| 14791123  | 1.13                  | 1                        | 1.25                  | 1                        | 1.27                  | 1                        | 1.22                  | 1                        |
| 14791124  | 2.10                  | 2                        | 2.37                  | 2                        | 2.37                  | 2                        | 2.28                  | 2                        |
| 14791127  | 2.09                  | 2                        | 2.04                  | 2                        | 2.59                  | 3                        | 2.24                  | 2                        |

| Sample ID | Copy Number           |                          |                       |                          |                       |                          |                       |                          |
|-----------|-----------------------|--------------------------|-----------------------|--------------------------|-----------------------|--------------------------|-----------------------|--------------------------|
|           | r = 1                 |                          | r = 2                 |                          | r = 3                 |                          | Average               |                          |
|           | Ratio<br>(target/ref) | Estimated<br>Copy Number |
| 14791128  | 1.40                  | 1                        | 1.63                  | 2                        | 1.47                  | 1                        | 1.50                  | 2                        |
| 14791129  | 1.38                  | 1                        | 1.15                  | 1                        | 1.22                  | 1                        | 1.25                  | 1                        |
| 14791130  | 1.10                  | 1                        | 1.16                  | 1                        | 1.04                  | 1                        | 1.10                  | 1                        |
| 14791132  | 3.31                  | 3                        | 3.49                  | 3                        | 3.19                  | 3                        | 3.33                  | 3                        |
| 14791136  | 2.02                  | 2                        | 2.08                  | 2                        | 1.85                  | 2                        | 1.98                  | 2                        |
| 14791137  | 0.99                  | 1                        | 1.06                  | 1                        | 0.95                  | 1                        | 1.00                  | 1                        |
| 14791140  | 1.32                  | 1                        | 1.29                  | 1                        | 1.22                  | 1                        | 1.27                  | 1                        |
| 14791141  | 1.13                  | 1                        | 1.02                  | 1                        | 1.06                  | 1                        | 1.07                  | 1                        |
| 14791142  | 1.20                  | 1                        | 1.06                  | 1                        | 1.11                  | 1                        | 1.12                  | 1                        |
| 14791143  | 1.01                  | 1                        | 1.02                  | 1                        | 0.98                  | 1                        | 1.00                  | 1                        |
| 14791146  | 1.12                  | 1                        | 1.04                  | 1                        | 1.22                  | 1                        | 1.12                  | 1                        |
| 14791147  | 1.16                  | 1                        | 1.14                  | 1                        | 1.23                  | 1                        | 1.17                  | 1                        |
| 14791149  | 2.88                  | 3                        | 2.88                  | 3                        | 3.38                  | 3                        | 3.05                  | 3                        |
| 14791152  | 5.72                  | 6                        | 5.05                  | 5                        | 4.70                  | 5                        | 5.15                  | 5                        |
| 14791153  | 0.97                  | 1                        | 1.13                  | 1                        | 1.05                  | 1                        | 1.05                  | 1                        |
| 14791157  | 1.99                  | 2                        | 2.63                  | 3                        | 2.15                  | 2                        | 2.26                  | 2                        |
| 14791159  | 1.88                  | 2                        | 1.99                  | 2                        | 2.13                  | 2                        | 2.00                  | 2                        |
| 14791160  | 1.18                  | 1                        | 1.31                  | 1                        | 1.25                  | 1                        | 1.25                  | 1                        |
| 14791161  | 1.14                  | 1                        | 1.30                  | 1                        | 1.27                  | 1                        | 1.24                  | 1                        |



| Sample ID | Copy Number           |                          |                       |                          |                       |                          |                       |                          |
|-----------|-----------------------|--------------------------|-----------------------|--------------------------|-----------------------|--------------------------|-----------------------|--------------------------|
|           | r = 1                 |                          | r = 2                 |                          | r = 3                 |                          | Average               |                          |
|           | Ratio<br>(target/ref) | Estimated<br>Copy Number |
| 14791164  | 2.21                  | 2                        | 2.19                  | 2                        | 4.17                  | 4                        | 2.86                  | 3                        |
| 14791165  | 2.45                  | 2                        | 2.62                  | 3                        | 2.94                  | 3                        | 2.67                  | 3                        |
| 14791166  | 5.34                  | 5                        | 5.16                  | 5                        | 5.25                  | 5                        | 5.25                  | 5                        |

Notes: target, transgene *bar*; ref, endogenous gene *hmg*.
