# Supplementary material for: High-Throughput and Accurate Determination of Transgene Copy Number and Zygosity in Transgenic Maize: From DNA Extraction to Data Analysis
Source: MDPI journal article supplement (doi:10.3390/ijms222212487), 2021-11-19
Supplement: s1 [file s1]

**Table S6.** Primer pairs and probes of bar and hmg genes used in this study.

| Type of Assay                    | Gene Name  | Primer/Probe Name              | Sequence (5'–3')                                            | Amplicon Size (bp) | Reference  |
|----------------------------------|------------|--------------------------------|-------------------------------------------------------------|--------------------|------------|
| Sequence PCR                     | <i>hmg</i> | hmg-seq-F                      | ATCCCTGAGCGAGTCGGTAA                                        | 201                | This paper |
|                                  |            | hmg-seq--R                     | GTTTCCCTACCTCGCCCTTG                                        |                    |            |
| TaqMan qPCR & <u>Digital PCR</u> | <i>bar</i> | <u>bar-taq-F</u>               | <u>ACAAGCACGGTCAACTTCC</u>                                  | 60                 | [52]       |
|                                  |            | <u>bar-taq-R</u>               | <u>GAGGTCGTCCGTCCACTC</u>                                   |                    |            |
|                                  |            | <u>bar-taq-Probe</u>           | <u>FAM-TACCGAGCCGCAGGAACC-BQ1</u>                           |                    |            |
|                                  | <i>hmg</i> | hmg-taq-F1                     | TTGGACTAGAAATCTCGTGCTGA                                     | 79                 | [53]       |
|                                  |            | hmg-taq-R1                     | GCTACATAGGGAGCCTTGTCCT                                      |                    |            |
|                                  |            | <u>hmg-taq-F2</u>              | <u>TGGACTAGAAATCTCGTGCTGA</u>                               | 76                 | This paper |
|                                  |            | <u>hmg-taq-R2</u>              | <u>TACATAGGGAGCCTTGTCCT</u>                                 |                    |            |
|                                  |            | <u>hmg-taq-Probe</u>           | <u>VIC-CAATCCACACAAACGCACGCGTA-BQ1</u>                      |                    |            |
| Southern blot                    | <i>bar</i> | bar-southern-F                 | TTTCGGTGACGGGCAGGAC                                         | 484                | This paper |
|                                  |            | bar-southern-R                 | TGCACCATCGTCAACCACTA                                        |                    |            |
| Vector construct                 | <i>hmg</i> | hmg-EcoR I-F<br>hmg-Hind III-R | CGGAATTTCGAAATCCCTGAGCGAGTCGG<br>CCCAAGCTTAGTAACAACGCAATTGA | 229                | This paper |
