# Supplementary material for: High-Throughput and Accurate Determination of Transgene Copy Number and Zygosity in Transgenic Maize: From DNA Extraction to Data Analysis
Source: MDPI journal article supplement (doi:10.3390/ijms222212487), 2021-11-19
Supplement: s1 [file s1]

**Table S2.** Comparison of *bar* copy number estimated by TaqMan and Southern blot assay for 45 T<sub>0</sub> plants. For TaqMan assay, *bar* copy number was assessed with three repeats (r = 3).

| Transgenic Lines | Ratio<br>(target/ref) | Estimated Copy Number<br>by TaqMan Assay | Estimated Copy Number<br>by Southern Blots | Agree (+) or Disagree (-) |
|------------------|-----------------------|------------------------------------------|--------------------------------------------|---------------------------|
| Non-transformed  | 0                     | 0                                        | 0                                          | +                         |
| 12141320         | 1.64±0.07             | 2                                        | 2                                          | +                         |
| 12141321         | 0.95±0.11             | 1                                        | 1                                          | +                         |
| 12151398         | 0.95±0.05             | 1                                        | 1                                          | +                         |
| 12161497         | 1.09±0.06             | 1                                        | 1                                          | +                         |
| 12161498         | 1.13±0.11             | 1                                        | 1                                          | +                         |
| 12171579         | 1.11±0.03             | 1                                        | 1                                          | +                         |
| 13181646         | 0.98±0.07             | 1                                        | 2                                          | -                         |
| 13181668         | 1.19±0.00             | 1                                        | 1                                          | +                         |
| 13191758         | 1.08±0.04             | 1                                        | 1                                          | +                         |
| 13191764         | 0.89±0.01             | 1                                        | 1                                          | +                         |
| 13191765         | 1.17±0.08             | 1                                        | 1                                          | +                         |
| 13201829         | 1.03±0.02             | 1                                        | 2                                          | -                         |
| 13201830         | 1.04±0.02             | 1                                        | 2                                          | -                         |
| 12030065         | 1.06±0.11             | 1                                        | 1                                          | +                         |
| 12050430         | 1.09±0.04             | 1                                        | 1                                          | +                         |
| 12060607         | 0.87±0.05             | 1                                        | 1                                          | +                         |
| 12060608         | 1.04±0.08             | 1                                        | 1                                          | +                         |
| 12060612         | 2.56±0.04             | 3                                        | 2                                          | -                         |

| Transgenic Lines | Ratio<br>(target/ref) | Estimated Copy Number<br>by TaqMan Assay | Estimated Copy Number<br>by Southern Blots | Agree (+) or Disagree (-) |
|------------------|-----------------------|------------------------------------------|--------------------------------------------|---------------------------|
| 12060614         | 1.10±0.09             | 1                                        | 1                                          | +                         |
| 12070775         | 1.09±0.03             | 1                                        | 1                                          | +                         |
| 12080815         | 1.06±0.03             | 1                                        | 1                                          | +                         |
| 12141331         | 1.05±0.04             | 1                                        | 1                                          | +                         |
| 12161432         | 1.70±0.14             | 2                                        | 2                                          | +                         |
| 12030070         | 1.20±0.09             | 1                                        | 1                                          | +                         |
| 12040218         | 1.07±0.12             | 1                                        | 1                                          | +                         |
| 12040220         | 1.75±0.10             | 2                                        | 3                                          | -                         |
| 12050433         | 0.63±0.06             | 1                                        | 1                                          | +                         |
| 12060625         | 1.18±0.17             | 1                                        | 1                                          | +                         |
| 12060631         | 1.76±0.12             | 2                                        | 2                                          | +                         |
| 12101014         | 0.79±0.06             | 1                                        | 1                                          | +                         |
| 12111088         | 1.00±0.05             | 1                                        | 1                                          | +                         |
| 12030068         | 0                     | 0                                        | 0                                          | +                         |
| 12030212         | 1.13±0.09             | 1                                        | 1                                          | +                         |
| 12030213         | 1.17±0.07             | 1                                        | 1                                          | +                         |
| 12030071         | 4.87±0.38             | 5                                        | 6                                          | +                         |
| 12030210         | 1.32±0.05             | 1                                        | 1                                          | +                         |
| 12030066         | 5.38±0.21             | 5                                        | 6                                          | +                         |
| 12030067         | 2.15±0.11             | 2                                        | 3                                          | -                         |
| 12010004         | 2.04±0.06             | 2                                        | 2                                          | +                         |
| 12010005         | 1.23±0.02             | 1                                        | 1                                          | +                         |

| Transgenic Lines | Ratio<br>(target/ref) | Estimated Copy Number<br>by TaqMan Assay | Estimated Copy Number<br>by Southern Blots | Agree (+) or Disagree (-) |
|------------------|-----------------------|------------------------------------------|--------------------------------------------|---------------------------|
| 12030084         | 0                     | 0                                        | 0                                          | +                         |
| 12030085         | 3.39±0.18             | 3                                        | 3                                          | +                         |
| 12030086         | 1.16±0.01             | 1                                        | 1                                          | +                         |
| 12040234         | 0.71±0.02             | 1                                        | 1                                          | +                         |
| 12040236         | 1.10±0.01             | 1                                        | 1                                          | +                         |

Notes: target, transgene *bar*; ref, endogenous gene *hmg*.
