# Supplementary material for: High-Throughput and Accurate Determination of Transgene Copy Number and Zygosity in Transgenic Maize: From DNA Extraction to Data Analysis
Source: MDPI journal article supplement (doi:10.3390/ijms222212487), 2021-11-19
Supplement: s1 [file s1]

**Table S5.** Copy numbers of 2,016 T<sub>0</sub> samples and successive progeny (T<sub>1</sub> and T<sub>2</sub> ) with one technical repetition.

| Transgenic Line | T <sub>0</sub>     |                       | T <sub>1</sub> |                    |                                               | T <sub>2</sub>                            |
|-----------------|--------------------|-----------------------|----------------|--------------------|-----------------------------------------------|-------------------------------------------|
|                 | Ratio (target/ref) | Estimated Copy Number | Homozygote No. | Ratio (target/ref) | Estimated Copy Number of T <sub>0</sub> Plant | Verification of T <sub>1</sub> Homozygote |
| 14210420        | 0.94               | 1                     | 39             | 4.28               | 2                                             | 39: two-copy homozygote                   |
| 14310319        | 1.05               | 1                     | 3              | 2.31               | 1                                             | 3: single-copy homozygote                 |
| 14401378        | 1.04               | 1                     | 4              | 2.45               | 1                                             | 4: single-copy homozygote                 |
| 14320052        | 1.17               | 1                     | 8              | 2.56               | 1                                             | 8: single-copy homozygote                 |
| 14200239        | 0.88               | 1                     | 41             | 3.85               | 2                                             | 41: two-copy homozygote                   |
| 14220324        | 1.18               | 1                     | 44             | 4.11               | 2                                             | 44: two-copy homozygote                   |
| 14220339        | 0.78               | 1                     | 7              | 2.02               | 1                                             | 7: single-copy homozygote                 |
| 14230292        | 1.02               | 1                     | 7              | 2.00               | 1                                             | 7: single-copy homozygote                 |
| 14360847        | 1.28               | 1                     | 11             | 1.60               | 1                                             | 11: single-copy homozygote                |
| 14350538        | 1.18               | 1                     | 6              | 1.73               | 1                                             | 6: single-copy homozygote                 |
| 14350542        | 1.08               | 1                     | 4              | 2.58               | 1                                             | 4: single-copy homozygote                 |
| 14350544        | 1.01               | 1                     | 9              | 1.67               | 1                                             | 9: single-copy homozygote                 |
| 14370045        | 1.08               | 1                     | 5              | 2.02               | 1                                             | 5: single-copy homozygote                 |
| 14370428        | 1.39               | 1                     | 1              | 4.42               | 2                                             | 1: two-copy homozygote                    |
| 14400520        | 1.36               | 1                     | 1              | 2.50               | 1                                             | 1: single-copy homozygote                 |
| 14350563        | 1.09               | 1                     | 5              | 1.84               | 1                                             | 5: single-copy homozygote                 |
| 14350564        | 0.91               | 1                     | 1              | 2.37               | 1                                             | 1: single-copy homozygote                 |
| 14340421        | 0.96               | 1                     | 1              | 2.26               | 1                                             | 1: single-copy homozygote                 |
| 14360957        | 1.24               | 1                     | 1              | 2.33               | 1                                             | 1: single-copy homozygote                 |

| Transgenic Line | T <sub>0</sub>     |                       | T <sub>1</sub> |                    |                                               | T <sub>2</sub>                            |
|-----------------|--------------------|-----------------------|----------------|--------------------|-----------------------------------------------|-------------------------------------------|
|                 | Ratio (target/ref) | Estimated Copy Number | Homozygote No. | Ratio (target/ref) | Estimated Copy Number of T <sub>0</sub> Plant | Verification of T <sub>1</sub> Homozygote |
| 14350703        | 1.07               | 1                     | 32             | 2.41               | 1                                             | 32: single-copy homozygote                |
| 14361414        | 1.30               | 1                     | 4              | 1.93               | 1                                             | 4: single-copy homozygote                 |
| 14340143        | 1.18               | 1                     | 12             | 2.55               | 1                                             | 12: single-copy homozygote                |
| 14390872        | 1.35               | 1                     | 2              | 2.00               | 1                                             | 2: single-copy homozygote                 |
| 14160881        | 1.13               | 1                     | 42             | 2.00               | 1                                             | 42: single-copy homozygote                |
| 14170715        | 0.92               | 1                     | 19             | 1.81               | 1                                             | 19: single-copy homozygote                |
| 14200479        | 1.14               | 1                     | 2              | 2.48               | 1                                             | 2: single-copy homozygote                 |
| 14350623        | 1.18               | 1                     | 3              | 2.35               | 1                                             | 3: single-copy homozygote                 |
| 14370950        | 1.11               | 1                     | 5              | 2.04               | 1                                             | 5: single-copy homozygote                 |
| 14210292        | 1.10               | 1                     | 6              | 2.50               | 1                                             | 6: single-copy homozygote                 |
| 14350454        | 1.04               | 1                     | 5              | 2.08               | 1                                             | 5: single-copy homozygote                 |
| 14350456        | 1.07               | 1                     | 1              | 2.07               | 1                                             | 1: single-copy homozygote                 |
| 14361197        | 1.28               | 1                     | 35             | 2.44               | 1                                             | 35: single-copy homozygote                |
| 14370621        | 1.12               | 1                     | 2              | 2.53               | 1                                             | 2: single-copy homozygote                 |
| 14380998        | 1.13               | 1                     | 4              | 2.16               | 1                                             | 4: single-copy homozygote                 |
| 14361428        | 1.28               | 1                     | 2              | 1.97               | 1                                             | 2: single-copy homozygote                 |
| 14371237        | 0.84               | 1                     | 7              | 2.18               | 1                                             | 7: single-copy homozygote                 |
| 14340538        | 1.26               | 1                     | 5              | 2.26               | 1                                             | 5: single-copy homozygote                 |
| 14340658        | 1.12               | 1                     | 13             | 1.64               | 1                                             | 13: single-copy homozygote                |
| 14340660        | 0.99               | 1                     | 10             | 1.79               | 1                                             | 10: single-copy homozygote                |

| Transgenic Line | T <sub>0</sub>     |                       | T <sub>1</sub> |                    |                                               | T <sub>2</sub>                            |
|-----------------|--------------------|-----------------------|----------------|--------------------|-----------------------------------------------|-------------------------------------------|
|                 | Ratio (target/ref) | Estimated Copy Number | Homozygote No. | Ratio (target/ref) | Estimated Copy Number of T <sub>0</sub> Plant | Verification of T <sub>1</sub> Homozygote |
| 14350950        | 1.09               | 1                     | 3              | 1.97               | 1                                             | 3: single-copy homozygote                 |
| 14361454        | 1.14               | 1                     | 9              | 5.98               | ≥3                                            | 9: multi-copy                             |
| 14390255        | 1.36               | 1                     | 12             | 1.98               | 1                                             | 12: single-copy homozygote                |
| 14170848        | 0.64               | 1                     | 12             | 2.12               | 1                                             | 12: single-copy homozygote                |
| 14170855        | 0.98               | 1                     | 3              | 2.01               | 1                                             | 3: single-copy homozygote                 |
| 14190548        | 0.58               | 1                     | 36             | 2.38               | 1                                             | 36: single-copy homozygote                |
| 14190565        | 1.04               | 1                     | 38             | 2.14               | 1                                             | 38: single-copy homozygote                |
| 14160932        | 1.04               | 1                     | 2              | 2.13               | 1                                             | 2: single-copy homozygote                 |
| 14170762        | 1.12               | 1                     | 1              | 2.06               | 1                                             | 1: single-copy homozygote                 |
| 14200036        | 0.99               | 1                     | 5              | 1.96               | 1                                             | 5: single-copy homozygote                 |
| 14380299        | 1.29               | 1                     | 2              | 2.09               | 1                                             | 2: single-copy homozygote                 |
| 14380300        | 1.05               | 1                     | 1              | 2.13               | 1                                             | 1: single-copy homozygote                 |
| 14370366        | 0.84               | 1                     | 5              | 2.05               | 1                                             | 5: single-copy homozygote                 |
| 14350656        | 1.09               | 1                     | 31             | 2.21               | 1                                             | 31: single-copy homozygote                |
| 14371295        | 0.92               | 1                     | 1              | 2.03               | 1                                             | 1: single-copy homozygote                 |
| 14390342        | 1.28               | 1                     | 2              | 2.12               | 1                                             | 2: single-copy homozygote                 |
| 14390343        | 0.88               | 1                     | 40             | 2.00               | 1                                             | 40: single-copy homozygote                |
| 14390355        | 1.15               | 1                     | 1              | 1.89               | 1                                             | 1: single-copy homozygote                 |
| 14361370        | 1.06               | 1                     | 2              | 2.16               | 1                                             | 2: single-copy homozygote                 |
| 14391004        | 1.10               | 1                     | 9              | 2.37               | 1                                             | 9: single-copy homozygote                 |

| Transgenic Line | T <sub>0</sub>     |                       | T <sub>1</sub> |                    |                                               | T <sub>2</sub>                            |
|-----------------|--------------------|-----------------------|----------------|--------------------|-----------------------------------------------|-------------------------------------------|
|                 | Ratio (target/ref) | Estimated Copy Number | Homozygote No. | Ratio (target/ref) | Estimated Copy Number of T <sub>0</sub> Plant | Verification of T <sub>1</sub> Homozygote |
| 14390487        | 1.28               | 1                     | 4              | 2.19               | 1                                             | 4: single-copy homozygote                 |
| 14350842        | 1.25               | 1                     | 2              | 2.52               | 1                                             | 2: single-copy homozygote                 |
| 14190432        | 1.16               | 1                     | 1              | 2.26               | 1                                             | 1: single-copy homozygote                 |
| 14170577        | 1.16               | 1                     | 32             | 2.37               | 1                                             | 32: single-copy homozygote                |
| 14220112        | 0.95               | 1                     | 4              | 2.44               | 1                                             | 4: single-copy homozygote                 |
| 14170885        | 1.08               | 1                     | 3              | 2.00               | 1                                             | 3: single-copy homozygote                 |
| 14190532        | 1.17               | 1                     | 6              | 2.43               | 1                                             | 6: single-copy homozygote                 |
| 14190621        | 1.15               | 1                     | 31             | 2.23               | 1                                             | 31: single-copy homozygote                |
| 14200602        | 1.18               | 1                     | 5              | 2.00               | 1                                             | 5: single-copy homozygote                 |
| 14220207        | 0.53               | 1                     | 5              | 2.45               | 1                                             | 5: single-copy homozygote                 |
| 14200179        | 1.07               | 1                     | 1              | 2.37               | 1                                             | 1: single-copy homozygote                 |
| 14220306        | 0.99               | 1                     | 6              | 2.19               | 1                                             | 6: single-copy homozygote                 |
| 14230234        | 1.03               | 1                     | 8              | 2.14               | 1                                             | 8: single-copy homozygote                 |
| 14230249        | 0.99               | 1                     | 9              | 1.87               | 1                                             | 9: single-copy homozygote                 |
| 14200310        | 1.18               | 1                     | 6              | 2.28               | 1                                             | 6: single-copy homozygote                 |
| 14210308        | 1.01               | 1                     | 38             | 2.37               | 1                                             | 38: single-copy homozygote                |
| 14160715        | 1.20               | 1                     | 3              | 2.04               | 1                                             | 3: single-copy homozygote                 |
| 14220039        | 0.99               | 1                     | 5              | 2.04               | 1                                             | 5: single-copy homozygote                 |
| 14320365        | 1.38               | 1                     | 35             | 1.96               | 1                                             | 35: single-copy homozygote                |
| 14380001        | 1.35               | 1                     | 3              | 1.81               | 1                                             | 3: single-copy homozygote                 |

| Transgenic Line | T <sub>0</sub>     |                       | T <sub>1</sub> |                    |                                               | T <sub>2</sub>                            |
|-----------------|--------------------|-----------------------|----------------|--------------------|-----------------------------------------------|-------------------------------------------|
|                 | Ratio (target/ref) | Estimated Copy Number | Homozygote No. | Ratio (target/ref) | Estimated Copy Number of T <sub>0</sub> Plant | Verification of T <sub>1</sub> Homozygote |
| 14180147        | 1.25               | 1                     | 5              | 1.88               | 1                                             | 5: single-copy homozygote                 |
| 14210052        | 1.34               | 1                     | 2              | 2.16               | 1                                             | 2: single-copy homozygote                 |
| 14210061        | 1.18               | 1                     | 4              | 4.82               | 2                                             | 4: two-copy homozygote                    |
| 14160622        | 1.11               | 1                     | 31             | 2.36               | 1                                             | 31: single-copy homozygote                |
| 14170424        | 1.29               | 1                     | 1              | 2.12               | 1                                             | 1: single-copy homozygote                 |
| 14160759        | 1.27               | 1                     | 5              | 2.46               | 1                                             | 5: single-copy homozygote                 |
| 14160573        | 0.94               | 1                     | 4              | 2.12               | 1                                             | 4: single-copy homozygote                 |
| 14170654        | 1.13               | 1                     | 2              | 2.39               | 1                                             | 2: single-copy homozygote                 |
| 14170120        | 1.09               | 1                     | 34             | 2.24               | 1                                             | 34: single-copy homozygote                |
| 14170123        | 1.03               | 1                     | 4              | 2.26               | 1                                             | 4: single-copy homozygote                 |
| 14381608        | 1.23               | 1                     | 1              | 2.38               | 1                                             | 1: single-copy homozygote                 |
| 14400968        | 1.29               | 1                     | 1              | 2.43               | 1                                             | 1: single-copy homozygote                 |
| 14430123        | 1.09               | 1                     | 1              | 2.24               | 1                                             | 1: single-copy homozygote                 |
| 14310352        | 1.04               | 1                     | 1              | 1.64               | 1                                             | 1: single-copy homozygote                 |
| 14340607        | 1.01               | 1                     | 1              | 1.99               | 1                                             | 1: single-copy homozygote                 |
| 14430640        | 1.15               | 1                     | 33             | 2.55               | 1                                             | 33: single-copy homozygote                |
| 14410426        | 1.07               | 1                     | 7              | 1.93               | 1                                             | 7: single-copy homozygote                 |
| 14160854        | 1.11               | 1                     | 33             | 2.66               | 1                                             | 33: single-copy homozygote                |
| 14170695        | 1.23               | 1                     | 34             | 2.48               | 1                                             | 34: single-copy homozygote                |
| 14170706        | 0.89               | 1                     | 32             | 2.21               | 1                                             | 32: single-copy homozygote                |

| Transgenic Line | T <sub>0</sub>     |                       | T <sub>1</sub> |                    |                                               | T <sub>2</sub>                            |
|-----------------|--------------------|-----------------------|----------------|--------------------|-----------------------------------------------|-------------------------------------------|
|                 | Ratio (target/ref) | Estimated Copy Number | Homozygote No. | Ratio (target/ref) | Estimated Copy Number of T <sub>0</sub> Plant | Verification of T <sub>1</sub> Homozygote |
| 14430584        | 1.09               | 1                     | 3              | 1.97               | 1                                             | 3: single-copy homozygote                 |
| 14380608        | 1.02               | 1                     | 1              | 2.13               | 1                                             | 1: single-copy homozygote                 |
| 14391260        | 1.06               | 1                     | 1              | 2.23               | 1                                             | 1: single-copy homozygote                 |
| 14390080        | 1.05               | 1                     | 2              | 2.06               | 1                                             | 2: single-copy homozygote                 |
| 14380117        | 1.30               | 1                     | 6              | 2.05               | 1                                             | 6: single-copy homozygote                 |
| 14370446        | 0.98               | 1                     | 2              | 1.99               | 1                                             | 2: single-copy homozygote                 |
| 14380422        | 1.23               | 1                     | 4              | 1.96               | 1                                             | 4: single-copy homozygote                 |
| 14400549        | 1.17               | 1                     | 2              | 1.92               | 1                                             | 2: single-copy homozygote                 |
| 14400822        | 1.28               | 1                     | 2              | 2.19               | 1                                             | 2: single-copy homozygote                 |
| 14380196        | 1.10               | 1                     | 5              | 2.07               | 1                                             | 5: single-copy homozygote                 |
| 14340247        | 0.93               | 1                     | 1              | 3.93               | 2                                             | 1: two-copy homozygote                    |
| 14380220        | 1.18               | 1                     | 2              | 1.92               | 1                                             | 2: single-copy homozygote                 |
| 14400385        | 1.08               | 1                     | 4              | 2.14               | 1                                             | 4: single-copy homozygote                 |
| 14391033        | 0.97               | 1                     | 1              | 2.29               | 1                                             | 1: single-copy homozygote                 |
| 14391049        | 1.21               | 1                     | 1              | 2.30               | 1                                             | 1: single-copy homozygote                 |
| 14400914        | 1.22               | 1                     | 1              | 2.07               | 1                                             | 1: single-copy homozygote                 |
| 14401000        | 1.14               | 1                     | 1              | 2.33               | 1                                             | 1: single-copy homozygote                 |
| 14410439        | 1.15               | 1                     | 1              | 2.10               | 1                                             | 1: single-copy homozygote                 |
| 14310085        | 1.21               | 1                     | 2              | 2.47               | 1                                             | 2: single-copy homozygote                 |
| 14390690        | 1.21               | 1                     | 4              | 2.11               | 1                                             | 4: single-copy homozygote                 |

| Transgenic Line | T <sub>0</sub>     |                       | T <sub>1</sub> |                    |                                               | T <sub>2</sub>                            |
|-----------------|--------------------|-----------------------|----------------|--------------------|-----------------------------------------------|-------------------------------------------|
|                 | Ratio (target/ref) | Estimated Copy Number | Homozygote No. | Ratio (target/ref) | Estimated Copy Number of T <sub>0</sub> Plant | Verification of T <sub>1</sub> Homozygote |
| 14360503        | 1.18               | 1                     | 1              | 2.27               | 1                                             | 1: single-copy homozygote                 |
| 14420290        | 1.14               | 1                     | 3              | 2.31               | 1                                             | 3: single-copy homozygote                 |
| 14190326        | 1.20               | 1                     | 5              | 1.81               | 1                                             | 5: single-copy homozygote                 |
| 14170366        | 1.02               | 1                     | 2              | 2.49               | 1                                             | 2: single-copy homozygote                 |
| 15100520        | 1.08               | 1                     | 9              | 2.24               | 1                                             | 9: single-copy homozygote                 |
| 15081919        | 1.23               | 1                     | 5              | 2.14               | 1                                             | 5: single-copy homozygote                 |
| 15081920        | 1.02               | 1                     | 5              | 2.09               | 1                                             | 5: single-copy homozygote                 |
| 15110690        | 1.29               | 1                     | 19             | 5.84               | ≥3                                            | 19: multi-copy                            |
| 15110698        | 1.29               | 1                     | 7              | 5.63               | ≥3                                            | 7: multi-copy                             |
| 15110634        | 1.10               | 1                     | 12             | 2.34               | 1                                             | 12: single-copy homozygote                |
| 15120299        | 0.93               | 1                     | 9              | 2.30               | 1                                             | 9: single-copy homozygote                 |
| 15120302        | 0.97               | 1                     | 1              | 2.23               | 1                                             | 1: single-copy homozygote                 |
| 15150169        | 0.92               | 1                     | 4              | 1.97               | 1                                             | 4: single-copy homozygote                 |
| 15170320        | 1.06               | 1                     | 4              | 2.00               | 1                                             | 4: single-copy homozygote                 |
| 15141228        | 0.98               | 1                     | 11             | 2.24               | 1                                             | 11: single-copy homozygote                |
| 15161041        | 1.14               | 1                     | 14             | 2.23               | 1                                             | 14: single-copy homozygote                |
| 15111280        | 1.07               | 1                     | 10             | 2.21               | 1                                             | 10: single-copy homozygote                |
| 15120631        | 1.02               | 1                     | 4              | 2.63               | 1                                             | 4: single-copy homozygote                 |
| 15121828        | 1.10               | 1                     | 2              | 2.22               | 1                                             | 2: single-copy homozygote                 |
| 15121839        | 1.06               | 1                     | 8              | 4.38               | 2                                             | 8: two-copy homozygote                    |

| Transgenic Line | T <sub>0</sub>     |                       | T <sub>1</sub> |                    |                                               | T <sub>2</sub>                            |
|-----------------|--------------------|-----------------------|----------------|--------------------|-----------------------------------------------|-------------------------------------------|
|                 | Ratio (target/ref) | Estimated Copy Number | Homozygote No. | Ratio (target/ref) | Estimated Copy Number of T <sub>0</sub> Plant | Verification of T <sub>1</sub> Homozygote |
| 15150230        | 1.06               | 1                     | 11             | 2.42               | 1                                             | 11: single-copy homozygote                |
| 15150233        | 1.06               | 1                     | 4              | 2.35               | 1                                             | 4: single-copy homozygote                 |
| 15150201        | 1.31               | 1                     | 3              | 2.25               | 1                                             | 3: single-copy homozygote                 |
| 15060872        | 1.03               | 1                     | 11             | 1.95               | 1                                             | 11: single-copy homozygote                |
| 15071092        | 0.96               | 1                     | 8              | 2.03               | 1                                             | 8: single-copy homozygote                 |
| 14300181        | 1.34               | 1                     | 17             | 2.08               | 1                                             | 17: single-copy homozygote                |
| 15100599        | 1.13               | 1                     | 1              | 2.02               | 1                                             | 1: single-copy homozygote                 |
| 15120826        | 1.19               | 1                     | 3              | 2.24               | 1                                             | 3: single-copy homozygote                 |
| 15080779        | 1.23               | 1                     | 13             | 2.32               | 1                                             | 13: single-copy homozygote                |
| 15141257        | 1.15               | 1                     | 3              | 2.47               | 1                                             | 3: single-copy homozygote                 |
| 15081176        | 1.37               | 1                     | 8              | 4.51               | 2                                             | 8: two-copy homozygote                    |
| 15081189        | 1.13               | 1                     | 9              | 1.88               | 1                                             | 9: single-copy homozygote                 |
| 15160210        | 0.98               | 1                     | 12             | 2.35               | 1                                             | 12: single-copy homozygote                |
| 15111121        | 0.98               | 1                     | 9              | 2.14               | 1                                             | 9: single-copy homozygote                 |
| 15081552        | 0.99               | 1                     | 1              | 2.24               | 1                                             | 1: single-copy homozygote                 |
| 15131112        | 1.37               | 1                     | 14             | 4.09               | 2                                             | 14: two-copy homozygote                   |
| 15140420        | 1.16               | 1                     | 4              | 2.05               | 1                                             | 4: single-copy homozygote                 |
| 15120568        | 1.27               | 1                     | 13             | 2.00               | 1                                             | 13: single-copy homozygote                |
| 15210583        | 1.33               | 1                     | 14             | 4.12               | 2                                             | 14: two-copy homozygote                   |
| 15070777        | 1.01               | 1                     | 3              | 2.44               | 1                                             | 3: single-copy homozygote                 |



| Transgenic Line | T <sub>0</sub>     |                       | T <sub>1</sub> |                    |                                               | T <sub>2</sub>                            |
|-----------------|--------------------|-----------------------|----------------|--------------------|-----------------------------------------------|-------------------------------------------|
|                 | Ratio (target/ref) | Estimated Copy Number | Homozygote No. | Ratio (target/ref) | Estimated Copy Number of T <sub>0</sub> Plant | Verification of T <sub>1</sub> Homozygote |
| 15121160        | 0.83               | 1                     | 4              | 2.31               | 1                                             | 4: single-copy homozygote                 |
| 15140592        | 1.17               | 1                     | 9              | 5.08               | 2                                             | 9: two-copy homozygote                    |
| 15140297        | 1.18               | 1                     | 15             | 2.12               | 1                                             | 15: single-copy homozygote                |
| 15170950        | 1.00               | 1                     | 6              | 2.26               | 1                                             | 6: single-copy homozygote                 |
| 15180322        | 1.19               | 1                     | 7              | 2.19               | 1                                             | 7: single-copy homozygote                 |
| 15170804        | 1.38               | 1                     | 7              | 5.10               | ≥3                                            | 7: multi-copy                             |
| 15140118        | 1.05               | 1                     | 2              | 2.42               | 1                                             | 2: single-copy homozygote                 |
| 15141556        | 0.97               | 1                     | 13             | 1.83               | 1                                             | 13: single-copy homozygote                |
| 15160191        | 1.12               | 1                     | 16             | 2.16               | 1                                             | 16: single-copy homozygote                |
| 15180338        | 1.14               | 1                     | 4              | 4.45               | 2                                             | 4: two-copy homozygote                    |
| 15160335        | 1.07               | 1                     | 2              | 1.94               | 1                                             | 2: single-copy homozygote                 |
| 15160377        | 1.03               | 1                     | 21             | 2.18               | 1                                             | 21: single-copy homozygote                |
| 15180611        | 1.11               | 1                     | 1              | 2.24               | 1                                             | 1: single-copy homozygote                 |
| 15170392        | 1.13               | 1                     | 3              | 2.02               | 1                                             | 3: single-copy homozygote                 |
| 15140842        | 0.57               | 1                     | 2              | 4.67               | 2                                             | 2: two-copy homozygote                    |
| 15170557        | 0.57               | 1                     | 12             | 4.33               | 2                                             | 12: two-copy homozygote                   |
| 15070712        | 1.14               | 1                     | 9              | 2.01               | 1                                             | 9: single-copy homozygote                 |
| 15081520        | 0.96               | 1                     | 5              | 2.58               | 1                                             | 5: single-copy homozygote                 |
| 15110963        | 0.96               | 1                     | 21             | 2.00               | 1                                             | 21: single-copy homozygote                |
| 15200377        | 1.15               | 1                     | 6              | 2.12               | 1                                             | 6: single-copy homozygote                 |

| Transgenic Line | T <sub>0</sub>     |                       | T <sub>1</sub> |                    |                                               | T <sub>2</sub>                            |
|-----------------|--------------------|-----------------------|----------------|--------------------|-----------------------------------------------|-------------------------------------------|
|                 | Ratio (target/ref) | Estimated Copy Number | Homozygote No. | Ratio (target/ref) | Estimated Copy Number of T <sub>0</sub> Plant | Verification of T <sub>1</sub> Homozygote |
| 15120927        | 1.23               | 1                     | 1              | 2.21               | 1                                             | 1: single-copy homozygote                 |
| 15171068        | 1.34               | 1                     | 8              | 2.44               | 1                                             | 8: single-copy homozygote                 |
| 15040107        | 1.32               | 1                     | 9              | 3.55               | 2                                             | 9: two-copy homozygote                    |
| 15040111        | 0.91               | 1                     | 11             | 3.67               | 2                                             | 11: two-copy homozygote                   |
| 15160953        | 1.26               | 1                     | 4              | 4.85               | ≥3                                            | 4: multi-copy                             |
| 15030172        | 1.06               | 1                     | 7              | 2.17               | 1                                             | 7: single-copy homozygote                 |
| 15040132        | 0.82               | 1                     | 6              | 2.12               | 1                                             | 6: single-copy homozygote                 |
| 15060400        | 1.14               | 1                     | 4              | 2.04               | 1                                             | 4: single-copy homozygote                 |
| 15100625        | 1.08               | 1                     | 5              | 2.08               | 1                                             | 5: single-copy homozygote                 |
| 15071011        | 1.09               | 1                     | 1              | 2.20               | 1                                             | 1: single-copy homozygote                 |
| 15060132        | 1.19               | 1                     | 2              | 2.28               | 1                                             | 2: single-copy homozygote                 |
| 15070531        | 0.94               | 1                     | 7              | 1.90               | 1                                             | 7: single-copy homozygote                 |
| 15070533        | 1.12               | 1                     | 6              | 2.11               | 1                                             | 6: single-copy homozygote                 |
| 15070543        | 1.08               | 1                     | 13             | 2.30               | 1                                             | 13: single-copy homozygote                |
| 15070548        | 1.10               | 1                     | 14             | 2.28               | 1                                             | 14: single-copy homozygote                |
| 15080260        | 0.92               | 1                     | 11             | 1.67               | 1                                             | 11: single-copy homozygote                |
| 15090241        | 0.65               | 1                     | 10             | 2.01               | 1                                             | 10: single-copy homozygote                |
| 15111564        | 1.13               | 1                     | 6              | 2.05               | 1                                             | 6: single-copy homozygote                 |
| 15111737        | 1.13               | 1                     | 1              | 2.04               | 1                                             | 1: single-copy homozygote                 |
| 15111738        | 1.01               | 1                     | 1              | 2.11               | 1                                             | 1: single-copy homozygote                 |

| Transgenic Line | T <sub>0</sub>     |                       | T <sub>1</sub> |                    |                                               | T <sub>2</sub>                            |
|-----------------|--------------------|-----------------------|----------------|--------------------|-----------------------------------------------|-------------------------------------------|
|                 | Ratio (target/ref) | Estimated Copy Number | Homozygote No. | Ratio (target/ref) | Estimated Copy Number of T <sub>0</sub> Plant | Verification of T <sub>1</sub> Homozygote |
| 15131113        | 0.86               | 1                     | 4              | 2.39               | 1                                             | 4: single-copy homozygote                 |
| 15110418        | 1.06               | 1                     | 2              | 2.08               | 1                                             | 2: single-copy homozygote                 |
| 15080665        | 1.02               | 1                     | 4              | 1.80               | 1                                             | 4: single-copy homozygote                 |
| 15060417        | 1.11               | 1                     | 7              | 1.99               | 1                                             | 7: single-copy homozygote                 |
| 15070005        | 0.81               | 1                     | 6              | 2.00               | 1                                             | 6: single-copy homozygote                 |
| 15081723        | 0.95               | 1                     | 5              | 1.71               | 1                                             | 5: single-copy homozygote                 |
| 15100673        | 1.08               | 1                     | 2              | 2.12               | 1                                             | 2: single-copy homozygote                 |
| 15060384        | 1.03               | 1                     | 2              | 2.07               | 1                                             | 2: single-copy homozygote                 |
| 15200043        | 1.15               | 1                     | 1              | 2.38               | 1                                             | 1: single-copy homozygote                 |
| 15110319        | 1.19               | 1                     | 2              | 2.38               | 1                                             | 2: single-copy homozygote                 |
| 15110428        | 1.27               | 1                     | 9              | 3.84               | 2                                             | 9: two-copy homozygote                    |
| 14260065        | 1.08               | 1                     | 5              | 2.03               | 1                                             | 5: single-copy homozygote                 |
| 15100368        | 0.98               | 1                     | 4              | 2.53               | 1                                             | 4: single-copy homozygote                 |
| 15100451        | 1.04               | 1                     | 10             | 2.28               | 1                                             | 10: single-copy homozygote                |
| 15090229        | 1.12               | 1                     | 2              | 2.16               | 1                                             | 2: single-copy homozygote                 |
| 15111559        | 1.08               | 1                     | 7              | 2.16               | 1                                             | 7: single-copy homozygote                 |
| 15141526        | 1.10               | 1                     | 8              | 2.13               | 1                                             | 8: single-copy homozygote                 |
| 15200665        | 1.18               | 1                     | 6              | 4.15               | 2                                             | 6: two-copy homozygote                    |
| 15190645        | 1.08               | 1                     | 13             | 2.34               | 1                                             | 13: single-copy homozygote                |
| 15050055        | 1.06               | 1                     | 2              | 4.54               | 2                                             | 2: two-copy homozygote                    |

| Transgenic Line | T <sub>0</sub>     |                       | T <sub>1</sub> |                    |                                               | T <sub>2</sub>                            |
|-----------------|--------------------|-----------------------|----------------|--------------------|-----------------------------------------------|-------------------------------------------|
|                 | Ratio (target/ref) | Estimated Copy Number | Homozygote No. | Ratio (target/ref) | Estimated Copy Number of T <sub>0</sub> Plant | Verification of T <sub>1</sub> Homozygote |
| 15060569        | 1.06               | 1                     | 2              | 2.38               | 1                                             | 2: single-copy homozygote                 |
| 15081546        | 1.09               | 1                     | 2              | 2.20               | 1                                             | 2: single-copy homozygote                 |
| 15081651        | 1.08               | 1                     | 3              | 2.48               | 1                                             | 3: single-copy homozygote                 |
| 15030052        | 1.23               | 1                     | 2              | 2.20               | 1                                             | 2: single-copy homozygote                 |
| 15030115        | 1.07               | 1                     | 1              | 2.12               | 1                                             | 1: single-copy homozygote                 |
| 15070813        | 0.98               | 1                     | 12             | 2.08               | 1                                             | 12: single-copy homozygote                |
| 15081293        | 1.09               | 1                     | 6              | 2.07               | 1                                             | 6: single-copy homozygote                 |
| 15130052        | 1.39               | 1                     | 15             | 2.12               | 1                                             | 15: single-copy homozygote                |
| 15141024        | 1.11               | 1                     | 2              | 2.24               | 1                                             | 2: single-copy homozygote                 |
| 15140990        | 1.25               | 1                     | 1              | 2.15               | 1                                             | 1: single-copy homozygote                 |
| 15121204        | 1.12               | 1                     | 7              | 2.16               | 1                                             | 7: single-copy homozygote                 |
| 15131195        | 1.07               | 1                     | 3              | 2.40               | 1                                             | 3: single-copy homozygote                 |
| 15150228        | 1.25               | 1                     | 3              | 4.07               | ≥3                                            | 3: multi-copy                             |
| 15131064        | 1.10               | 1                     | 1              | 2.18               | 1                                             | 1: single-copy homozygote                 |
| 15111164        | 1.05               | 1                     | 1              | 2.20               | 1                                             | 1: single-copy homozygote                 |
| 15060292        | 1.04               | 1                     | 3              | 2.22               | 1                                             | 3: single-copy homozygote                 |
| 15110528        | 0.99               | 1                     | 1              | 2.25               | 1                                             | 1: single-copy homozygote                 |
| 15150151        | 1.13               | 1                     | 5              | 2.00               | 1                                             | 5: single-copy homozygote                 |
| 15081212        | 1.14               | 1                     | 4              | 2.12               | 1                                             | 4: single-copy homozygote                 |
| 15140104        | 1.14               | 1                     | 11             | 1.99               | 1                                             | 11: single-copy homozygote                |

| Transgenic Line | T <sub>0</sub>     |                       | T <sub>1</sub> |                    |                                               | T <sub>2</sub>                            |
|-----------------|--------------------|-----------------------|----------------|--------------------|-----------------------------------------------|-------------------------------------------|
|                 | Ratio (target/ref) | Estimated Copy Number | Homozygote No. | Ratio (target/ref) | Estimated Copy Number of T <sub>0</sub> Plant | Verification of T <sub>1</sub> Homozygote |
| 15180363        | 1.22               | 1                     | 3              | 2.08               | 1                                             | 3: single-copy homozygote                 |
| 15190698        | 1.05               | 1                     | 19             | 2.40               | 1                                             | 19: single-copy homozygote                |
| 15120113        | 1.28               | 1                     | 10             | 4.40               | 2                                             | 10: two-copy homozygote                   |
| 15170033        | 0.53               | 1                     | 1              | 5.52               | ≥3                                            | 1: multi-copy                             |
| 15060915        | 1.10               | 1                     | 8              | 2.54               | 1                                             | 8: single-copy homozygote                 |
| 15090480        | 1.12               | 1                     | 4              | 2.42               | 1                                             | 4: single-copy homozygote                 |
| 15120511        | 0.97               | 1                     | 10             | 1.92               | 1                                             | 10: single-copy homozygote                |
| 15080059        | 0.96               | 1                     | 9              | 2.18               | 1                                             | 9: single-copy homozygote                 |
| 15150012        | 1.22               | 1                     | 7              | 2.33               | 1                                             | 7: single-copy homozygote                 |
| 15160960        | 1.15               | 1                     | 1              | 2.20               | 1                                             | 1: single-copy homozygote                 |
| 15170045        | 1.12               | 1                     | 11             | 1.91               | 1                                             | 11: single-copy homozygote                |
| 15121881        | 1.13               | 1                     | 9              | 1.62               | 1                                             | 9: single-copy homozygote                 |
| 15180507        | 1.18               | 1                     | 11             | 2.26               | 1                                             | 11: single-copy homozygote                |
| 15180554        | 1.06               | 1                     | 2              | 1.89               | 1                                             | 2: single-copy homozygote                 |
| 14371258        | 0.75               | 1                     | 5              | 2.19               | 1                                             | 5: single-copy homozygote                 |
| 16131430        | 1.30               | 1                     | 9              | 1.92               | 1                                             | 9: single-copy homozygote                 |
| 16141216        | 1.31               | 1                     | 21             | 4.96               | 2                                             | 21: two-copy homozygote                   |
| 16141272        | 1.17               | 1                     | 13             | 1.94               | 1                                             | 13: single-copy homozygote                |
| 16131061        | 1.27               | 1                     | 10             | 2.22               | 1                                             | 10: single-copy homozygote                |
| 16140761        | 1.21               | 1                     | 1              | 2.00               | 1                                             | 1: single-copy homozygote                 |

| Transgenic Line | T <sub>0</sub>     |                       | T <sub>1</sub> |                    |                                               | T <sub>2</sub>                            |
|-----------------|--------------------|-----------------------|----------------|--------------------|-----------------------------------------------|-------------------------------------------|
|                 | Ratio (target/ref) | Estimated Copy Number | Homozygote No. | Ratio (target/ref) | Estimated Copy Number of T <sub>0</sub> Plant | Verification of T <sub>1</sub> Homozygote |
| 16170629        | 1.15               | 1                     | 7              | 1.99               | 1                                             | 7: single-copy homozygote                 |
| 16130411        | 1.10               | 1                     | 1              | 1.99               | 1                                             | 1: single-copy homozygote                 |
| 16141062        | 1.28               | 1                     | 4              | 2.00               | 1                                             | 4: single-copy homozygote                 |
| 16170018        | 1.12               | 1                     | 3              | 2.02               | 1                                             | 3: single-copy homozygote                 |
| 16170236        | 1.14               | 1                     | 3              | 2.08               | 1                                             | 3: single-copy homozygote                 |
| 16131980        | 1.32               | 1                     | 1              | 2.32               | 1                                             | 1: single-copy homozygote                 |
| 16132036        | 1.39               | 1                     | 11             | 2.06               | 1                                             | 11: single-copy homozygote                |
| 16170335        | 1.14               | 1                     | 4              | 2.03               | 1                                             | 4: single-copy homozygote                 |
| 15451784        | 0.83               | 1                     | 5              | 1.97               | 1                                             | 5: single-copy homozygote                 |
| 15420478        | 1.26               | 1                     | 16             | 2.12               | 1                                             | 16: single-copy homozygote                |
| 15450976        | 1.22               | 1                     | 14             | 1.95               | 1                                             | 14: single-copy homozygote                |
| 15460982        | 0.99               | 1                     | 4              | 1.97               | 1                                             | 4: single-copy homozygote                 |
| 15452191        | 1.18               | 1                     | 16             | 3.57               | 2                                             | 16: two-copy homozygote                   |
| 16131937        | 1.21               | 1                     | 17             | 2.02               | 1                                             | 17: single-copy homozygote                |
| 16141199        | 1.34               | 1                     | 8              | 1.90               | 1                                             | 8: single-copy homozygote                 |
| 16141269        | 1.07               | 1                     | 13             | 1.97               | 1                                             | 13: single-copy homozygote                |
| 15130289        | 0.60               | 1                     | 8              | 3.84               | 2                                             | 8: two-copy homozygote                    |
| 16080137        | 0.96               | 1                     | 5              | 3.94               | 2                                             | 5: two-copy homozygote                    |
| 15480840        | 0.56               | 1                     | 6              | 2.09               | 1                                             | 6: single-copy homozygote                 |
| 15481096        | 0.98               | 1                     | 13             | 1.90               | 1                                             | 13: single-copy homozygote                |

| Transgenic Line | T <sub>0</sub>     |                       | T <sub>1</sub> |                    |                                               | T <sub>2</sub>                            |
|-----------------|--------------------|-----------------------|----------------|--------------------|-----------------------------------------------|-------------------------------------------|
|                 | Ratio (target/ref) | Estimated Copy Number | Homozygote No. | Ratio (target/ref) | Estimated Copy Number of T <sub>0</sub> Plant | Verification of T <sub>1</sub> Homozygote |
| 15471273        | 1.29               | 1                     | 6              | 1.99               | 1                                             | 6: single-copy homozygote                 |
| 15461128        | 1.26               | 1                     | 4              | 2.04               | 1                                             | 4: single-copy homozygote                 |
| 15501348        | 1.17               | 1                     | 11             | 2.03               | 1                                             | 11: single-copy homozygote                |
| 15521034        | 1.26               | 1                     | 5              | 2.08               | 1                                             | 5: single-copy homozygote                 |
| 16030625        | 1.12               | 1                     | 10             | 2.43               | 1                                             | 10: single-copy homozygote                |
| 16040632        | 0.67               | 1                     | 3              | 1.99               | 1                                             | 3: single-copy homozygote                 |
| 15480413        | 1.10               | 1                     | 10             | 2.00               | 1                                             | 10: single-copy homozygote                |
| 15492608        | 1.38               | 1                     | 3              | 2.08               | 1                                             | 3: single-copy homozygote                 |
| 15501083        | 1.16               | 1                     | 2              | 2.17               | 1                                             | 2: single-copy homozygote                 |
| 16030009        | 1.03               | 1                     | 15             | 1.92               | 1                                             | 15: single-copy homozygote                |
| 16030011        | 1.07               | 1                     | 6              | 2.01               | 1                                             | 6: single-copy homozygote                 |
| 15491447        | 0.95               | 1                     | 9              | 2.00               | 1                                             | 9: single-copy homozygote                 |
| 15500313        | 1.12               | 1                     | 9              | 2.00               | 1                                             | 9: single-copy homozygote                 |
| 15521137        | 1.24               | 1                     | 5              | 1.94               | 1                                             | 5: single-copy homozygote                 |
| 16030057        | 1.09               | 1                     | 15             | 1.88               | 1                                             | 15: single-copy homozygote                |
| 15491449        | 1.15               | 1                     | 12             | 1.98               | 1                                             | 12: single-copy homozygote                |
| 15491450        | 1.29               | 1                     | 4              | 2.00               | 1                                             | 4: single-copy homozygote                 |
| 15493103        | 0.84               | 1                     | 15             | 3.95               | 2                                             | 15: two-copy homozygote                   |
| 15491580        | 1.30               | 1                     | 11             | 1.99               | 1                                             | 11: single-copy homozygote                |
| 15493057        | 1.24               | 1                     | 7              | 1.94               | 1                                             | 7: single-copy homozygote                 |

| Transgenic Line | T <sub>0</sub>     |                       | T <sub>1</sub> |                    |                                               | T <sub>2</sub>                            |
|-----------------|--------------------|-----------------------|----------------|--------------------|-----------------------------------------------|-------------------------------------------|
|                 | Ratio (target/ref) | Estimated Copy Number | Homozygote No. | Ratio (target/ref) | Estimated Copy Number of T <sub>0</sub> Plant | Verification of T <sub>1</sub> Homozygote |
| 15493093        | 1.15               | 1                     | 7              | 1.77               | 1                                             | 7: single-copy homozygote                 |
| 15501304        | 1.35               | 1                     | 2              | 1.99               | 1                                             | 2: single-copy homozygote                 |
| 15501312        | 1.37               | 1                     | 14             | 1.87               | 1                                             | 14: single-copy homozygote                |
| 15510421        | 1.21               | 1                     | 4              | 1.97               | 1                                             | 4: single-copy homozygote                 |
| 16030002        | 1.10               | 1                     | 11             | 2.35               | 1                                             | 11: single-copy homozygote                |
| 16030017        | 1.26               | 1                     | 6              | 2.08               | 1                                             | 6: single-copy homozygote                 |
| 16040368        | 1.04               | 1                     | 5              | 2.30               | 1                                             | 5: single-copy homozygote                 |
| 16040369        | 0.93               | 1                     | 6              | 2.04               | 1                                             | 6: single-copy homozygote                 |
| 15470744        | 1.18               | 1                     | 13             | 2.00               | 1                                             | 13: single-copy homozygote                |
| 16030013        | 1.04               | 1                     | 12             | 1.98               | 1                                             | 12: single-copy homozygote                |
| 16140976        | 1.35               | 1                     | 5              | 1.89               | 1                                             | 5: single-copy homozygote                 |
| 15520565        | 1.34               | 1                     | 16             | 2.02               | 1                                             | 16: single-copy homozygote                |
| 16010210        | 1.28               | 1                     | 3              | 4.33               | 2                                             | 3: two-copy homozygote                    |
| 16030050        | 0.95               | 1                     | 4              | 1.67               | 1                                             | 4: single-copy homozygote                 |
| 15520065        | 1.10               | 1                     | 4              | 2.04               | 1                                             | 4: single-copy homozygote                 |
| 15510377        | 0.92               | 1                     | 10             | 1.95               | 1                                             | 10: single-copy homozygote                |
| 16150175        | 1.22               | 1                     | 6              | 2.01               | 1                                             | 6: single-copy homozygote                 |
| 15491158        | 1.01               | 1                     | 21             | 2.05               | 1                                             | 21: single-copy homozygote                |
| 15500855        | 1.12               | 1                     | 12             | 2.05               | 1                                             | 12: single-copy homozygote                |
| 15451083        | 1.35               | 1                     | 15             | 1.95               | 1                                             | 15: single-copy homozygote                |



| Transgenic Line | T <sub>0</sub>     |                       | T <sub>1</sub> |                    |                                               | T <sub>2</sub>                            |
|-----------------|--------------------|-----------------------|----------------|--------------------|-----------------------------------------------|-------------------------------------------|
|                 | Ratio (target/ref) | Estimated Copy Number | Homozygote No. | Ratio (target/ref) | Estimated Copy Number of T <sub>0</sub> Plant | Verification of T <sub>1</sub> Homozygote |
| 15410466        | 1.14               | 1                     | 6              | 1.98               | 1                                             | 6: single-copy homozygote                 |
| 15410495        | 1.10               | 1                     | 2              | 1.98               | 1                                             | 2: single-copy homozygote                 |
| 15462162        | 1.24               | 1                     | 9              | 1.68               | 1                                             | 9: single-copy homozygote                 |
| 15451687        | 1.30               | 1                     | 7              | 1.92               | 1                                             | 7: single-copy homozygote                 |
| 16010040        | 0.73               | 1                     | 13             | 2.31               | 1                                             | 13: single-copy homozygote                |
| 15492573        | 1.09               | 1                     | 12             | 1.91               | 1                                             | 12: single-copy homozygote                |
| 16010343        | 1.27               | 1                     | 2              | 2.05               | 1                                             | 2: single-copy homozygote                 |
| 16010364        | 1.38               | 1                     | 4              | 2.07               | 1                                             | 4: single-copy homozygote                 |
| 15510476        | 1.15               | 1                     | 11             | 2.05               | 1                                             | 11: single-copy homozygote                |
| 16040486        | 1.22               | 1                     | 12             | 2.15               | 1                                             | 12: single-copy homozygote                |
| 16010516        | 1.38               | 1                     | 11             | 3.87               | 2                                             | 11: two-copy homozygote                   |
| 16010539        | 1.35               | 1                     | 4              | 1.97               | 1                                             | 4: single-copy homozygote                 |
| 16040084        | 1.03               | 1                     | 2              | 1.80               | 1                                             | 2: single-copy homozygote                 |
| 15510471        | 1.02               | 1                     | 2              | 2.21               | 1                                             | 2: single-copy homozygote                 |
| 15430201        | 1.32               | 1                     | 26             | 1.99               | 1                                             | 26: single-copy homozygote                |
| 15470153        | 0.99               | 1                     | 11             | 2.02               | 1                                             | 11: single-copy homozygote                |
| 16140567        | 0.81               | 1                     | 5              | 2.00               | 1                                             | 5: single-copy homozygote                 |
| 16140692        | 1.26               | 1                     | 16             | 1.98               | 1                                             | 16: single-copy homozygote                |
| 16150184        | 1.31               | 1                     | 13             | 2.00               | 1                                             | 13: single-copy homozygote                |
| 16160257        | 1.16               | 1                     | 14             | 2.01               | 1                                             | 14: single-copy homozygote                |

| Transgenic Line | T <sub>0</sub>     |                       | T <sub>1</sub> |                    |                                               | T <sub>2</sub>                            |
|-----------------|--------------------|-----------------------|----------------|--------------------|-----------------------------------------------|-------------------------------------------|
|                 | Ratio (target/ref) | Estimated Copy Number | Homozygote No. | Ratio (target/ref) | Estimated Copy Number of T <sub>0</sub> Plant | Verification of T <sub>1</sub> Homozygote |
| 16060073        | 1.19               | 1                     | 11             | 1.99               | 1                                             | 11: single-copy homozygote                |
| 16170114        | 1.06               | 1                     | 11             | 1.85               | 1                                             | 11: single-copy homozygote                |
| 16130751        | 1.24               | 1                     | 8              | 2.05               | 1                                             | 8: single-copy homozygote                 |
| 16180471        | 1.14               | 1                     | 3              | 2.03               | 1                                             | 3: single-copy homozygote                 |
| 16080391        | 1.21               | 1                     | 19             | 2.04               | 1                                             | 19: single-copy homozygote                |
| 16020009        | 1.10               | 1                     | 12             | 2.02               | 1                                             | 12: single-copy homozygote                |
| 16131050        | 1.16               | 1                     | 20             | 1.98               | 1                                             | 20: single-copy homozygote                |
| 16160024        | 1.07               | 1                     | 5              | 1.67               | 1                                             | 5: single-copy homozygote                 |
| 16040521        | 1.08               | 1                     | 14             | 2.02               | 1                                             | 14: single-copy homozygote                |
| 16030638        | 1.34               | 1                     | 2              | 1.98               | 1                                             | 2: single-copy homozygote                 |
| 16040500        | 1.03               | 1                     | 6              | 2.08               | 1                                             | 6: single-copy homozygote                 |
| 16050122        | 1.01               | 1                     | 6              | 1.96               | 1                                             | 6: single-copy homozygote                 |
| 16050499        | 1.16               | 1                     | 19             | 1.99               | 1                                             | 19: single-copy homozygote                |
| 16040578        | 1.25               | 1                     | 17             | 2.04               | 1                                             | 17: single-copy homozygote                |
| 16160094        | 1.39               | 1                     | 13             | 1.99               | 1                                             | 13: single-copy homozygote                |
| 16150002        | 1.05               | 1                     | 5              | 1.98               | 1                                             | 5: single-copy homozygote                 |
| 15491097        | 1.11               | 1                     | 2              | 2.04               | 1                                             | 2: single-copy homozygote                 |
| 15290798        | 1.29               | 1                     | 13             | 1.66               | 1                                             | 13: single-copy homozygote                |
| 15451660        | 0.78               | 1                     | 9              | 4.04               | 2                                             | 9: two-copy homozygote                    |
| 16030350        | 1.19               | 1                     | 8              | 2.09               | 1                                             | 8: single-copy homozygote                 |

| Transgenic Line | T <sub>0</sub>     |                       | T <sub>1</sub> |                    |                                               | T <sub>2</sub>                            |
|-----------------|--------------------|-----------------------|----------------|--------------------|-----------------------------------------------|-------------------------------------------|
|                 | Ratio (target/ref) | Estimated Copy Number | Homozygote No. | Ratio (target/ref) | Estimated Copy Number of T <sub>0</sub> Plant | Verification of T <sub>1</sub> Homozygote |
| 16030371        | 1.27               | 1                     | 13             | 2.12               | 1                                             | 13: single-copy homozygote                |
| 16030538        | 1.05               | 1                     | 14             | 2.05               | 1                                             | 14: single-copy homozygote                |
| 16040327        | 1.40               | 1                     | 4              | 1.98               | 1                                             | 4: single-copy homozygote                 |
| 16030434        | 0.91               | 1                     | 18             | 1.94               | 1                                             | 18: single-copy homozygote                |
| 16030450        | 1.01               | 1                     | 1              | 2.00               | 1                                             | 1: single-copy homozygote                 |
| 16050028        | 0.61               | 1                     | 7              | 3.96               | 2                                             | 7: two-copy homozygote                    |
| 16050089        | 0.52               | 1                     | 18             | 2.01               | 1                                             | 18: single-copy homozygote                |
| 16060340        | 1.21               | 1                     | 3              | 2.08               | 1                                             | 3: single-copy homozygote                 |
| 16040112        | 1.30               | 1                     | 8              | 1.98               | 1                                             | 8: single-copy homozygote                 |
| 15450657        | 1.21               | 1                     | 7              | 2.03               | 1                                             | 7: single-copy homozygote                 |
| 15450856        | 1.09               | 1                     | 18             | 2.21               | 1                                             | 18: single-copy homozygote                |
| 15451183        | 1.17               | 1                     | 3              | 1.96               | 1                                             | 3: single-copy homozygote                 |
| 15451261        | 1.40               | 1                     | 8              | 4.08               | 2                                             | 8: two-copy homozygote                    |
| 15370559        | 0.87               | 1                     | 10             | 1.62               | 1                                             | 10: single-copy homozygote                |
| 15490178        | 1.11               | 1                     | 1              | 2.06               | 1                                             | 1: single-copy homozygote                 |
| 15520753        | 1.32               | 1                     | 4              | 1.92               | 1                                             | 4: single-copy homozygote                 |
| 16060204        | 1.26               | 1                     | 12             | 2.15               | 1                                             | 12: single-copy homozygote                |
| 16060211        | 1.35               | 1                     | 2              | 1.98               | 1                                             | 2: single-copy homozygote                 |
| 16140391        | 1.16               | 1                     | 19             | 1.99               | 1                                             | 19: single-copy homozygote                |
| 16160030        | 1.36               | 1                     | 14             | 2.06               | 1                                             | 14: single-copy homozygote                |

| Transgenic Line | T <sub>0</sub>     |                       | T <sub>1</sub> |                    |                                               | T <sub>2</sub>                            |
|-----------------|--------------------|-----------------------|----------------|--------------------|-----------------------------------------------|-------------------------------------------|
|                 | Ratio (target/ref) | Estimated Copy Number | Homozygote No. | Ratio (target/ref) | Estimated Copy Number of T <sub>0</sub> Plant | Verification of T <sub>1</sub> Homozygote |
| 16160031        | 1.26               | 1                     | 6              | 2.00               | 1                                             | 6: single-copy homozygote                 |
| 16160035        | 1.31               | 1                     | 5              | 2.01               | 1                                             | 5: single-copy homozygote                 |
| 16160152        | 0.84               | 1                     | 5              | 2.01               | 1                                             | 5: single-copy homozygote                 |
| 16160160        | 0.98               | 1                     | 1              | 1.85               | 1                                             | 1: single-copy homozygote                 |
| 16141280        | 1.20               | 1                     | 17             | 1.97               | 1                                             | 17: single-copy homozygote                |
| 15491757        | 1.25               | 1                     | 13             | 2.00               | 1                                             | 13: single-copy homozygote                |
| 15492922        | 1.04               | 1                     | 9              | 2.04               | 1                                             | 9: single-copy homozygote                 |
| 15480183        | 1.04               | 1                     | 6              | 1.96               | 1                                             | 6: single-copy homozygote                 |
| 15481071        | 0.91               | 1                     | 1              | 1.99               | 1                                             | 1: single-copy homozygote                 |
| 15471133        | 1.25               | 1                     | 6              | 2.05               | 1                                             | 6: single-copy homozygote                 |
| 16150177        | 1.19               | 1                     | 8              | 3.84               | 2                                             | 8: two-copy homozygote                    |
| 16140463        | 1.31               | 1                     | 6              | 1.94               | 1                                             | 6: single-copy homozygote                 |
| 16160432        | 0.97               | 1                     | 3              | 2.00               | 1                                             | 3: single-copy homozygote                 |
| 16170529        | 1.16               | 1                     | 18             | 1.99               | 1                                             | 18: single-copy homozygote                |
| 16160711        | 0.97               | 1                     | 5              | 1.74               | 1                                             | 5: single-copy homozygote                 |
| 16160586        | 1.11               | 1                     | 17             | 1.96               | 1                                             | 17: single-copy homozygote                |
| 15270383        | 1.21               | 1                     | 4              | 1.98               | 1                                             | 4: single-copy homozygote                 |
| 15300750        | 0.81               | 1                     | 12             | 4.02               | 2                                             | 12: two-copy homozygote                   |
| 15421055        | 0.80               | 1                     | 22             | 4.04               | 2                                             | 22: two-copy homozygote                   |
| 15440873        | 1.12               | 1                     | 5              | 1.97               | 1                                             | 5: single-copy homozygote                 |

| Transgenic Line | T <sub>0</sub>     |                       | T <sub>1</sub> |                    |                                               | T <sub>2</sub>                            |
|-----------------|--------------------|-----------------------|----------------|--------------------|-----------------------------------------------|-------------------------------------------|
|                 | Ratio (target/ref) | Estimated Copy Number | Homozygote No. | Ratio (target/ref) | Estimated Copy Number of T <sub>0</sub> Plant | Verification of T <sub>1</sub> Homozygote |
| 15520884        | 1.16               | 1                     | 8              | 2.07               | 1                                             | 8: single-copy homozygote                 |
| 16150091        | 1.10               | 1                     | 1              | 2.01               | 1                                             | 1: single-copy homozygote                 |
| 16160312        | 1.00               | 1                     | 1              | 1.85               | 1                                             | 1: single-copy homozygote                 |
| 16160333        | 1.18               | 1                     | 5              | 2.15               | 1                                             | 5: single-copy homozygote                 |
| 16170596        | 0.99               | 1                     | 15             | 1.98               | 1                                             | 15: single-copy homozygote                |
| 16130096        | 1.31               | 1                     | 13             | 2.00               | 1                                             | 13: single-copy homozygote                |
| 16080164        | 1.39               | 1                     | 17             | 1.98               | 1                                             | 17: single-copy homozygote                |
| 16160499        | 1.20               | 1                     | 19             | 2.05               | 1                                             | 19: single-copy homozygote                |
| 15360018        | 0.82               | 1                     | 4              | 2.32               | 1                                             | 4: single-copy homozygote                 |
| 15380275        | 0.68               | 1                     | 1              | 2.18               | 1                                             | 1: single-copy homozygote                 |
| 15390260        | 1.36               | 1                     | 5              | 2.39               | 1                                             | 5: single-copy homozygote                 |
| 15400048        | 1.27               | 1                     | 2              | 2.02               | 1                                             | 2: single-copy homozygote                 |
| 15400100        | 0.49               | 0                     | 7              | 1.83               | 1                                             | 7: single-copy homozygote                 |
| 16140244        | 1.30               | 1                     | 9              | 2.07               | 1                                             | 9: single-copy homozygote                 |
| 15451449        | 1.28               | 1                     | 2              | 1.97               | 1                                             | 2: single-copy homozygote                 |
| 15491613        | 0.99               | 1                     | 1              | 1.97               | 1                                             | 1: single-copy homozygote                 |
| 16030034        | 0.81               | 1                     | 11             | 1.85               | 1                                             | 11: single-copy homozygote                |
| 15500288        | 1.00               | 1                     | 14             | 2.00               | 1                                             | 14: single-copy homozygote                |
| 16010669        | 1.35               | 1                     | 1              | 2.41               | 1                                             | 1: single-copy homozygote                 |
| 16010743        | 1.26               | 1                     | 12             | 1.82               | 1                                             | 12: single-copy homozygote                |

| Transgenic Line | T <sub>0</sub>     |                       | T <sub>1</sub> |                    |                                               | T <sub>2</sub>                            |
|-----------------|--------------------|-----------------------|----------------|--------------------|-----------------------------------------------|-------------------------------------------|
|                 | Ratio (target/ref) | Estimated Copy Number | Homozygote No. | Ratio (target/ref) | Estimated Copy Number of T <sub>0</sub> Plant | Verification of T <sub>1</sub> Homozygote |
| 16020017        | 1.10               | 1                     | 14             | 2.08               | 1                                             | 14: single-copy homozygote                |
| 16040142        | 1.00               | 1                     | 16             | 1.90               | 1                                             | 16: single-copy homozygote                |
| 16040148        | 0.98               | 1                     | 3              | 1.95               | 1                                             | 3: single-copy homozygote                 |
| 16040167        | 1.22               | 1                     | 6              | 1.94               | 1                                             | 6: single-copy homozygote                 |
| 16040185        | 1.24               | 1                     | 4              | 1.77               | 1                                             | 4: single-copy homozygote                 |
| 16040197        | 1.27               | 1                     | 3              | 1.87               | 1                                             | 3: single-copy homozygote                 |
| 16040218        | 1.14               | 1                     | 14             | 2.05               | 1                                             | 14: single-copy homozygote                |
| 16050523        | 0.81               | 1                     | 16             | 1.97               | 1                                             | 16: single-copy homozygote                |
| 16141027        | 1.15               | 1                     | 8              | 1.86               | 1                                             | 8: single-copy homozygote                 |
| 16180138        | 1.10               | 1                     | 15             | 1.99               | 1                                             | 15: single-copy homozygote                |
| 16141437        | 1.20               | 1                     | 15             | 1.68               | 1                                             | 15: single-copy homozygote                |
| 15050410        | 1.07               | 1                     | 10             | 2.00               | 1                                             | 10: single-copy homozygote                |
| 16160223        | 1.18               | 1                     | 17             | 1.95               | 1                                             | 17: single-copy homozygote                |
| 16160265        | 1.16               | 1                     | 15             | 2.00               | 1                                             | 15: single-copy homozygote                |
| 16160288        | 1.13               | 1                     | 6              | 2.01               | 1                                             | 6: single-copy homozygote                 |
| 16130134        | 1.28               | 1                     | 14             | 1.98               | 1                                             | 14: single-copy homozygote                |
| 16160092        | 1.32               | 1                     | 2              | 4.85               | ≥3                                            | 2: multi-copy                             |
| 16131974        | 0.95               | 1                     | 9              | 5.80               | ≥3                                            | 9: multi-copy                             |
| 16160765        | 1.15               | 1                     | 1              | 1.85               | 1                                             | 1: single-copy homozygote                 |
| 16160815        | 1.26               | 1                     | 10             | 2.01               | 1                                             | 10: single-copy homozygote                |

| Transgenic Line | T <sub>0</sub>     |                       | T <sub>1</sub> |                    |                                               | T <sub>2</sub>                            |
|-----------------|--------------------|-----------------------|----------------|--------------------|-----------------------------------------------|-------------------------------------------|
|                 | Ratio (target/ref) | Estimated Copy Number | Homozygote No. | Ratio (target/ref) | Estimated Copy Number of T <sub>0</sub> Plant | Verification of T <sub>1</sub> Homozygote |
| 16090466        | 0.85               | 1                     | 9              | 1.99               | 1                                             | 9: single-copy homozygote                 |
| 16140586        | 1.38               | 1                     | 6              | 2.25               | 1                                             | 6: single-copy homozygote                 |
| 16150165        | 1.06               | 1                     | 11             | 2.03               | 1                                             | 11: single-copy homozygote                |
| 15490974        | 1.17               | 1                     | 8              | 2.07               | 1                                             | 8: single-copy homozygote                 |
| 15492035        | 1.27               | 1                     | 3              | 1.97               | 1                                             | 3: single-copy homozygote                 |
| 15492040        | 1.06               | 1                     | 12             | 2.04               | 1                                             | 12: single-copy homozygote                |
| 16140004        | 1.12               | 1                     | 3              | 1.74               | 1                                             | 3: single-copy homozygote                 |
| 16140183        | 1.19               | 1                     | 7              | 2.00               | 1                                             | 7: single-copy homozygote                 |
| 15520834        | 0.94               | 1                     | 4              | 1.96               | 1                                             | 4: single-copy homozygote                 |
| 16010823        | 1.04               | 1                     | 6              | 3.92               | 2                                             | 6: two-copy homozygote                    |
| 15491967        | 1.37               | 1                     | 13             | 2.00               | 1                                             | 13: single-copy homozygote                |
| 16010486        | 1.17               | 1                     | 11             | 1.99               | 1                                             | 11: single-copy homozygote                |
| 15460557        | 1.19               | 1                     | 15             | 2.00               | 1                                             | 15: single-copy homozygote                |
| 15460883        | 1.04               | 1                     | 11             | 1.84               | 1                                             | 11: single-copy homozygote                |
| 15481563        | 1.07               | 1                     | 9              | 1.95               | 1                                             | 9: single-copy homozygote                 |
| 15481650        | 1.11               | 1                     | 2              | 2.05               | 1                                             | 2: single-copy homozygote                 |
| 15481668        | 1.12               | 1                     | 8              | 1.94               | 1                                             | 8: single-copy homozygote                 |
| 15500798        | 1.11               | 1                     | 1              | 2.53               | 1                                             | 1: single-copy homozygote                 |
| 15510342        | 1.21               | 1                     | 6              | 2.07               | 1                                             | 6: single-copy homozygote                 |
| 16010658        | 0.97               | 1                     | 1              | 2.18               | 1                                             | 1: single-copy homozygote                 |

| Transgenic Line | T <sub>0</sub>     |                       | T <sub>1</sub> |                    |                                               | T <sub>2</sub>                            |
|-----------------|--------------------|-----------------------|----------------|--------------------|-----------------------------------------------|-------------------------------------------|
|                 | Ratio (target/ref) | Estimated Copy Number | Homozygote No. | Ratio (target/ref) | Estimated Copy Number of T <sub>0</sub> Plant | Verification of T <sub>1</sub> Homozygote |
| 16010661        | 1.15               | 1                     | 3              | 2.25               | 1                                             | 3: single-copy homozygote                 |
| 16030523        | 1.09               | 1                     | 2              | 2.02               | 1                                             | 2: single-copy homozygote                 |
| 16030539        | 1.09               | 1                     | 7              | 1.89               | 1                                             | 7: single-copy homozygote                 |
| 15470288        | 1.16               | 1                     | 13             | 2.00               | 1                                             | 13: single-copy homozygote                |
| 15471144        | 1.19               | 1                     | 4              | 2.12               | 1                                             | 4: single-copy homozygote                 |
| 15481339        | 1.09               | 1                     | 8              | 2.01               | 1                                             | 8: single-copy homozygote                 |
| 15491601        | 1.01               | 1                     | 1              | 2.00               | 1                                             | 1: single-copy homozygote                 |
| 15460816        | 1.21               | 1                     | 5              | 2.01               | 1                                             | 5: single-copy homozygote                 |
| 15500791        | 1.16               | 1                     | 3              | 2.01               | 1                                             | 3: single-copy homozygote                 |
| 15461991        | 1.26               | 1                     | 12             | 1.98               | 1                                             | 12: single-copy homozygote                |
| 15492008        | 1.22               | 1                     | 9              | 2.11               | 1                                             | 9: single-copy homozygote                 |
| 15460889        | 1.28               | 1                     | 16             | 2.03               | 1                                             | 16: single-copy homozygote                |
| 15490920        | 1.34               | 1                     | 1              | 1.86               | 1                                             | 1: single-copy homozygote                 |
| 15491739        | 1.13               | 1                     | 8              | 2.02               | 1                                             | 8: single-copy homozygote                 |
| 16010245        | 1.24               | 1                     | 5              | 1.95               | 1                                             | 5: single-copy homozygote                 |
| 15491693        | 1.24               | 1                     | 4              | 2.03               | 1                                             | 4: single-copy homozygote                 |
| 15520436        | 1.27               | 1                     | 10             | 1.99               | 1                                             | 10: single-copy homozygote                |
| 15490884        | 1.13               | 1                     | 2              | 1.94               | 1                                             | 2: single-copy homozygote                 |
| 15470537        | 1.24               | 1                     | 10             | 1.95               | 1                                             | 10: single-copy homozygote                |
| 15470588        | 1.07               | 1                     | 14             | 1.98               | 1                                             | 14: single-copy homozygote                |



| Transgenic Line | T <sub>0</sub>     |                       | T <sub>1</sub> |                    |                                               | T <sub>2</sub>                            |
|-----------------|--------------------|-----------------------|----------------|--------------------|-----------------------------------------------|-------------------------------------------|
|                 | Ratio (target/ref) | Estimated Copy Number | Homozygote No. | Ratio (target/ref) | Estimated Copy Number of T <sub>0</sub> Plant | Verification of T <sub>1</sub> Homozygote |
| 15481923        | 0.99               | 1                     | 11             | 1.91               | 1                                             | 11: single-copy homozygote                |
| 16020132        | 1.18               | 1                     | 1              | 2.03               | 1                                             | 1: single-copy homozygote                 |
| 16020143        | 1.32               | 1                     | 1              | 1.94               | 1                                             | 1: single-copy homozygote                 |
| 15501305        | 1.10               | 1                     | 9              | 2.01               | 1                                             | 9: single-copy homozygote                 |
| 15520141        | 0.66               | 1                     | 2              | 1.88               | 1                                             | 2: single-copy homozygote                 |
| 15520304        | 0.67               | 1                     | 8              | 3.70               | 2                                             | 8: two-copy homozygote                    |
| 16010092        | 1.21               | 1                     | 4              | 2.03               | 1                                             | 4: single-copy homozygote                 |
| 15461322        | 1.19               | 1                     | 14             | 1.94               | 1                                             | 14: single-copy homozygote                |
| 15461786        | 1.23               | 1                     | 20             | 1.68               | 1                                             | 20: single-copy homozygote                |
| 15461022        | 1.20               | 1                     | 13             | 1.95               | 1                                             | 13: single-copy homozygote                |
| 15480644        | 0.96               | 1                     | 13             | 4.76               | ≥3                                            | 13: multi-copy                            |
| 15490271        | 1.13               | 1                     | 4              | 2.01               | 1                                             | 4: single-copy homozygote                 |
| 15500141        | 1.12               | 1                     | 3              | 3.57               | 2                                             | 3: two-copy homozygote                    |
| 15500299        | 1.02               | 1                     | 12             | 1.87               | 1                                             | 12: single-copy homozygote                |
| 15490349        | 1.26               | 1                     | 6              | 1.99               | 1                                             | 6: single-copy homozygote                 |
| 15490401        | 1.17               | 1                     | 1              | 1.97               | 1                                             | 1: single-copy homozygote                 |
| 16010688        | 1.14               | 1                     | 1              | 1.98               | 1                                             | 1: single-copy homozygote                 |
| 16050011        | 1.12               | 1                     | 20             | 2.02               | 1                                             | 20: single-copy homozygote                |
| 15481878        | 1.16               | 1                     | 11             | 2.01               | 1                                             | 11: single-copy homozygote                |
| 15490197        | 1.06               | 1                     | 11             | 2.13               | 1                                             | 11: single-copy homozygote                |

| Transgenic Line | T <sub>0</sub>     |                       | T <sub>1</sub> |                    |                                               | T <sub>2</sub>                            |
|-----------------|--------------------|-----------------------|----------------|--------------------|-----------------------------------------------|-------------------------------------------|
|                 | Ratio (target/ref) | Estimated Copy Number | Homozygote No. | Ratio (target/ref) | Estimated Copy Number of T <sub>0</sub> Plant | Verification of T <sub>1</sub> Homozygote |
| 15490364        | 0.85               | 1                     | 8              | 2.06               | 1                                             | 8: single-copy homozygote                 |
| 15450562        | 0.85               | 1                     | 2              | 2.08               | 1                                             | 2: single-copy homozygote                 |
| 15492714        | 1.15               | 1                     | 4              | 2.06               | 1                                             | 4: single-copy homozygote                 |
| 15500213        | 0.99               | 1                     | 3              | 2.04               | 1                                             | 3: single-copy homozygote                 |
| 15500079        | 1.20               | 1                     | 16             | 1.96               | 1                                             | 16: single-copy homozygote                |
| 16010630        | 1.17               | 1                     | 5              | 1.96               | 1                                             | 5: single-copy homozygote                 |
| 15441370        | 1.28               | 1                     | 5              | 2.04               | 1                                             | 5: single-copy homozygote                 |
| 15470935        | 1.22               | 1                     | 12             | 2.02               | 1                                             | 12: single-copy homozygote                |
| 15520931        | 1.04               | 1                     | 11             | 1.89               | 1                                             | 11: single-copy homozygote                |
| 16030616        | 1.06               | 1                     | 12             | 1.90               | 1                                             | 12: single-copy homozygote                |
| 15491689        | 1.22               | 1                     | 1              | 2.00               | 1                                             | 1: single-copy homozygote                 |
| 15491786        | 1.12               | 1                     | 3              | 2.02               | 1                                             | 3: single-copy homozygote                 |
| 15491823        | 1.24               | 1                     | 7              | 1.97               | 1                                             | 7: single-copy homozygote                 |
| 15491837        | 1.18               | 1                     | 15             | 1.91               | 1                                             | 15: single-copy homozygote                |
| 16040458        | 1.01               | 1                     | 8              | 1.75               | 1                                             | 8: single-copy homozygote                 |
| 15450664        | 1.11               | 1                     | 10             | 2.02               | 1                                             | 10: single-copy homozygote                |
| 15500472        | 1.31               | 1                     | 6              | 1.93               | 1                                             | 6: single-copy homozygote                 |
| 15500498        | 0.84               | 1                     | 5              | 2.06               | 1                                             | 5: single-copy homozygote                 |
| 15521038        | 1.15               | 1                     | 4              | 2.13               | 1                                             | 4: single-copy homozygote                 |
| 15500626        | 1.34               | 1                     | 2              | 1.81               | 1                                             | 2: single-copy homozygote                 |

| Transgenic Line | T <sub>0</sub>     |                       | T <sub>1</sub> |                    |                                               | T <sub>2</sub>                            |
|-----------------|--------------------|-----------------------|----------------|--------------------|-----------------------------------------------|-------------------------------------------|
|                 | Ratio (target/ref) | Estimated Copy Number | Homozygote No. | Ratio (target/ref) | Estimated Copy Number of T <sub>0</sub> Plant | Verification of T <sub>1</sub> Homozygote |
| 15482138        | 1.05               | 1                     | 5              | 1.99               | 1                                             | 5: single-copy homozygote                 |
| 16010807        | 1.12               | 1                     | 1              | 1.98               | 1                                             | 1: single-copy homozygote                 |
| 15461201        | 1.03               | 1                     | 3              | 2.07               | 1                                             | 3: single-copy homozygote                 |
| 15461261        | 1.33               | 1                     | 9              | 2.11               | 1                                             | 9: single-copy homozygote                 |
| 15481124        | 1.15               | 1                     | 4              | 2.02               | 1                                             | 4: single-copy homozygote                 |
| 16030654        | 1.27               | 1                     | 8              | 1.92               | 1                                             | 8: single-copy homozygote                 |
| 15451151        | 1.16               | 1                     | 10             | 4.09               | 2                                             | 10: two-copy homozygote                   |
| 15490269        | 1.30               | 1                     | 2              | 1.87               | 1                                             | 2: single-copy homozygote                 |
| 15492723        | 1.22               | 1                     | 3              | 1.97               | 1                                             | 3: single-copy homozygote                 |
| 15451303        | 1.26               | 1                     | 13             | 1.98               | 1                                             | 13: single-copy homozygote                |
| 15491643        | 1.12               | 1                     | 12             | 2.00               | 1                                             | 12: single-copy homozygote                |
| 15471187        | 1.14               | 1                     | 1              | 2.12               | 1                                             | 1: single-copy homozygote                 |
| 15490982        | 1.17               | 1                     | 11             | 1.97               | 1                                             | 11: single-copy homozygote                |
| 15480865        | 1.34               | 1                     | 16             | 1.90               | 1                                             | 16: single-copy homozygote                |
| 15520539        | 0.84               | 1                     | 8              | 2.07               | 1                                             | 8: single-copy homozygote                 |
| 16030164        | 1.08               | 1                     | 1              | 2.03               | 1                                             | 1: single-copy homozygote                 |
| 16030309        | 0.99               | 1                     | 26             | 2.01               | 1                                             | 26: single-copy homozygote                |
| 16030643        | 0.94               | 1                     | 15             | 1.99               | 1                                             | 15: single-copy homozygote                |
| 15470543        | 0.91               | 1                     | 23             | 1.92               | 1                                             | 23: single-copy homozygote                |
| 15490070        | 1.17               | 1                     | 15             | 1.91               | 1                                             | 15: single-copy homozygote                |

| Transgenic Line | T <sub>0</sub>     |                       | T <sub>1</sub> |                    |                                               | T <sub>2</sub>                            |
|-----------------|--------------------|-----------------------|----------------|--------------------|-----------------------------------------------|-------------------------------------------|
|                 | Ratio (target/ref) | Estimated Copy Number | Homozygote No. | Ratio (target/ref) | Estimated Copy Number of T <sub>0</sub> Plant | Verification of T <sub>1</sub> Homozygote |
| 15490301        | 1.16               | 1                     | 13             | 2.07               | 1                                             | 13: single-copy homozygote                |
| 15490476        | 1.16               | 1                     | 12             | 2.02               | 1                                             | 12: single-copy homozygote                |
| 15490557        | 0.84               | 1                     | 11             | 1.93               | 1                                             | 11: single-copy homozygote                |
| 15490626        | 1.29               | 1                     | 8              | 1.90               | 1                                             | 8: single-copy homozygote                 |
| 15470538        | 1.07               | 1                     | 2              | 2.07               | 1                                             | 2: single-copy homozygote                 |
| 15490237        | 1.27               | 1                     | 14             | 2.04               | 1                                             | 14: single-copy homozygote                |
| 15520912        | 1.23               | 1                     | 4              | 2.01               | 1                                             | 4: single-copy homozygote                 |
| 15520966        | 1.17               | 1                     | 10             | 1.94               | 1                                             | 10: single-copy homozygote                |
| 15520967        | 1.39               | 1                     | 4              | 1.96               | 1                                             | 4: single-copy homozygote                 |
| 16010638        | 1.09               | 1                     | 4              | 1.83               | 1                                             | 4: single-copy homozygote                 |
| 15462054        | 1.08               | 1                     | 9              | 1.92               | 1                                             | 9: single-copy homozygote                 |
| 15462055        | 1.03               | 1                     | 15             | 1.93               | 1                                             | 15: single-copy homozygote                |
| 15462229        | 1.11               | 1                     | 12             | 2.00               | 1                                             | 12: single-copy homozygote                |
| 15492061        | 1.17               | 1                     | 6              | 3.82               | 2                                             | 6: two-copy homozygote                    |
| 15492215        | 1.14               | 1                     | 6              | 1.97               | 1                                             | 6: single-copy homozygote                 |
| 15492383        | 1.06               | 1                     | 1              | 1.96               | 1                                             | 1: single-copy homozygote                 |
| 15451125        | 1.29               | 1                     | 7              | 2.03               | 1                                             | 7: single-copy homozygote                 |
| 15451237        | 0.76               | 1                     | 10             | 1.97               | 1                                             | 10: single-copy homozygote                |
| 15461443        | 1.18               | 1                     | 7              | 1.96               | 1                                             | 7: single-copy homozygote                 |
| 15490265        | 1.32               | 1                     | 8              | 1.71               | 1                                             | 8: single-copy homozygote                 |

| Transgenic Line | T <sub>0</sub>     |                       | T <sub>1</sub> |                    |                                               | T <sub>2</sub>                            |
|-----------------|--------------------|-----------------------|----------------|--------------------|-----------------------------------------------|-------------------------------------------|
|                 | Ratio (target/ref) | Estimated Copy Number | Homozygote No. | Ratio (target/ref) | Estimated Copy Number of T <sub>0</sub> Plant | Verification of T <sub>1</sub> Homozygote |
| 15461407        | 1.13               | 1                     | 10             | 2.00               | 1                                             | 10: single-copy homozygote                |
| 15490858        | 1.31               | 1                     | 3              | 2.06               | 1                                             | 3: single-copy homozygote                 |
| 15491708        | 1.18               | 1                     | 15             | 1.97               | 1                                             | 15: single-copy homozygote                |
| 16030146        | 1.19               | 1                     | 19             | 1.99               | 1                                             | 19: single-copy homozygote                |
| 15470574        | 0.95               | 1                     | 16             | 2.32               | 1                                             | 16: single-copy homozygote                |
| 15460720        | 1.12               | 1                     | 10             | 2.05               | 1                                             | 10: single-copy homozygote                |
| 15460571        | 1.25               | 1                     | 7              | 1.82               | 1                                             | 7: single-copy homozygote                 |
| 15520271        | 1.16               | 1                     | 3              | 1.97               | 1                                             | 3: single-copy homozygote                 |
| 15430698        | 0.95               | 1                     | 6              | 1.91               | 1                                             | 6: single-copy homozygote                 |
| 15491440        | 1.04               | 1                     | 13             | 1.96               | 1                                             | 13: single-copy homozygote                |
| 15491505        | 1.16               | 1                     | 23             | 2.00               | 1                                             | 23: single-copy homozygote                |
| 16020174        | 0.88               | 1                     | 7              | 4.35               | 2                                             | 7: two-copy homozygote                    |
| 16020175        | 1.10               | 1                     | 1              | 2.22               | 1                                             | 1: single-copy homozygote                 |
| 16020242        | 1.10               | 1                     | 11             | 1.98               | 1                                             | 11: single-copy homozygote                |
| 16030183        | 1.17               | 1                     | 3              | 1.99               | 1                                             | 3: single-copy homozygote                 |
| 16020163        | 1.13               | 1                     | 1              | 1.83               | 1                                             | 1: single-copy homozygote                 |
| 15511009        | 1.10               | 1                     | 8              | 4.20               | 2                                             | 8: two-copy homozygote                    |
| 15492260        | 1.07               | 1                     | 9              | 4.11               | 2                                             | 9: two-copy homozygote                    |
| 15500811        | 1.19               | 1                     | 2              | 1.93               | 1                                             | 2: single-copy homozygote                 |
| 15481155        | 1.11               | 1                     | 1              | 2.03               | 1                                             | 1: single-copy homozygote                 |

| Transgenic Line | T <sub>0</sub>     |                       | T <sub>1</sub> |                    |                                               | T <sub>2</sub>                            |
|-----------------|--------------------|-----------------------|----------------|--------------------|-----------------------------------------------|-------------------------------------------|
|                 | Ratio (target/ref) | Estimated Copy Number | Homozygote No. | Ratio (target/ref) | Estimated Copy Number of T <sub>0</sub> Plant | Verification of T <sub>1</sub> Homozygote |
| 15520029        | 0.82               | 1                     | 12             | 1.92               | 1                                             | 12: single-copy homozygote                |
| 15510478        | 1.11               | 1                     | 1              | 1.99               | 1                                             | 1: single-copy homozygote                 |
| 15461813        | 1.04               | 1                     | 1              | 2.13               | 1                                             | 1: single-copy homozygote                 |
| 15492073        | 1.20               | 1                     | 2              | 1.96               | 1                                             | 2: single-copy homozygote                 |
| 15481541        | 1.14               | 1                     | 1              | 2.11               | 1                                             | 1: single-copy homozygote                 |
| 15470859        | 0.65               | 1                     | 6              | 1.98               | 1                                             | 6: single-copy homozygote                 |
| 15500992        | 1.19               | 1                     | 8              | 2.10               | 1                                             | 8: single-copy homozygote                 |
| 15480932        | 1.17               | 1                     | 4              | 2.04               | 1                                             | 4: single-copy homozygote                 |
| 16010021        | 1.16               | 1                     | 3              | 2.05               | 1                                             | 3: single-copy homozygote                 |
| 15451601        | 0.96               | 1                     | 2              | 4.10               | 2                                             | 2: two-copy homozygote                    |
| 15462092        | 0.90               | 1                     | 4              | 1.96               | 1                                             | 4: single-copy homozygote                 |
| 15491388        | 1.05               | 1                     | 5              | 1.98               | 1                                             | 5: single-copy homozygote                 |
| 15491406        | 1.04               | 1                     | 7              | 1.97               | 1                                             | 7: single-copy homozygote                 |
| 15500795        | 1.12               | 1                     | 8              | 1.98               | 1                                             | 8: single-copy homozygote                 |
| 15480778        | 1.13               | 1                     | 3              | 2.24               | 1                                             | 3: single-copy homozygote                 |
| 15491592        | 1.28               | 1                     | 22             | 2.00               | 1                                             | 22: single-copy homozygote                |
| 15491293        | 1.14               | 1                     | 8              | 4.00               | 2                                             | 8: two-copy homozygote                    |
| 15491352        | 1.18               | 1                     | 7              | 2.04               | 1                                             | 7: single-copy homozygote                 |
| 15461869        | 1.17               | 1                     | 19             | 1.96               | 1                                             | 19: single-copy homozygote                |
| 15511029        | 1.13               | 1                     | 14             | 2.00               | 1                                             | 14: single-copy homozygote                |

| Transgenic Line | T <sub>0</sub>     |                       | T <sub>1</sub> |                    |                                               | T <sub>2</sub>                            |
|-----------------|--------------------|-----------------------|----------------|--------------------|-----------------------------------------------|-------------------------------------------|
|                 | Ratio (target/ref) | Estimated Copy Number | Homozygote No. | Ratio (target/ref) | Estimated Copy Number of T <sub>0</sub> Plant | Verification of T <sub>1</sub> Homozygote |
| 15390427        | 1.20               | 1                     | 24             | 2.01               | 1                                             | 24: single-copy homozygote                |
| 15300728        | 1.03               | 1                     | 1              | 1.97               | 1                                             | 1: single-copy homozygote                 |
| 15300763        | 1.20               | 1                     | 12             | 2.03               | 1                                             | 12: single-copy homozygote                |
| 15260352        | 1.22               | 1                     | 1              | 2.00               | 1                                             | 1: single-copy homozygote                 |
| 15290079        | 1.39               | 1                     | 20             | 2.08               | 1                                             | 20: single-copy homozygote                |
| 15330785        | 1.17               | 1                     | 8              | 2.03               | 1                                             | 8: single-copy homozygote                 |
| 15290186        | 1.36               | 1                     | 6              | 1.96               | 1                                             | 6: single-copy homozygote                 |
| 16110983        | 1.38               | 1                     | 4              | 2.35               | 1                                             | 4: single-copy homozygote                 |
| 16131903        | 0.99               | 1                     | 6              | 2.06               | 1                                             | 6: single-copy homozygote                 |
| 16080290        | 1.36               | 1                     | 12             | 2.11               | 1                                             | 12: single-copy homozygote                |
| 16100413        | 1.14               | 1                     | 2              | 1.95               | 1                                             | 2: single-copy homozygote                 |
| 16121095        | 1.18               | 1                     | 4              | 1.99               | 1                                             | 4: single-copy homozygote                 |
| 15111558        | 1.03               | 1                     | 13             | 2.31               | 1                                             | 13: single-copy homozygote                |
| 15180006        | 1.17               | 1                     | 2              | 1.99               | 1                                             | 2: single-copy homozygote                 |
| 16140847        | 0.99               | 1                     | 13             | 2.04               | 1                                             | 13: single-copy homozygote                |
| 16111334        | 1.24               | 1                     | 5              | 1.88               | 1                                             | 5: single-copy homozygote                 |
| 14371384        | 1.06               | 1                     | 1              | 2.28               | 1                                             | 1: single-copy homozygote                 |
| 14391435        | 1.10               | 1                     | 15             | 1.97               | 1                                             | 15: single-copy homozygote                |
| 14310219        | 1.35               | 1                     | 1              | 2.00               | 1                                             | 1: single-copy homozygote                 |
| 14330052        | 1.27               | 1                     | 8              | 1.96               | 1                                             | 8: single-copy homozygote                 |

| Transgenic Line | T <sub>0</sub>     |                       | T <sub>1</sub> |                    |                                               | T <sub>2</sub>                            |
|-----------------|--------------------|-----------------------|----------------|--------------------|-----------------------------------------------|-------------------------------------------|
|                 | Ratio (target/ref) | Estimated Copy Number | Homozygote No. | Ratio (target/ref) | Estimated Copy Number of T <sub>0</sub> Plant | Verification of T <sub>1</sub> Homozygote |
| 16170023        | 0.97               | 1                     | 12             | 2.04               | 1                                             | 12: single-copy homozygote                |
| 16170066        | 1.02               | 1                     | 10             | 1.98               | 1                                             | 10: single-copy homozygote                |
| 16130438        | 1.26               | 1                     | 8              | 2.02               | 1                                             | 8: single-copy homozygote                 |
| 16200274        | 1.10               | 1                     | 7              | 1.87               | 1                                             | 7: single-copy homozygote                 |
| 15121284        | 0.49               | 0                     | 2              | 2.10               | 1                                             | 2: single-copy homozygote                 |
| 15120340        | 1.09               | 1                     | 11             | 2.11               | 1                                             | 11: single-copy homozygote                |
| 15120343        | 1.11               | 1                     | 6              | 3.64               | 2                                             | 6: two-copy homozygote                    |
| 15400785        | 1.13               | 1                     | 7              | 2.10               | 1                                             | 7: single-copy homozygote                 |
| 16131089        | 1.26               | 1                     | 9              | 2.09               | 1                                             | 9: single-copy homozygote                 |
| 16150077        | 1.21               | 1                     | 15             | 2.08               | 1                                             | 15: single-copy homozygote                |
| 16111469        | 1.37               | 1                     | 10             | 1.98               | 1                                             | 10: single-copy homozygote                |
| 16111470        | 1.23               | 1                     | 14             | 2.07               | 1                                             | 14: single-copy homozygote                |
| 16180548        | 0.91               | 1                     | 13             | 2.00               | 1                                             | 13: single-copy homozygote                |
| 15441087        | 1.20               | 1                     | 1              | 2.06               | 1                                             | 1: single-copy homozygote                 |
| 15451075        | 1.01               | 1                     | 10             | 2.08               | 1                                             | 10: single-copy homozygote                |
| 16111431        | 1.29               | 1                     | 9              | 2.13               | 1                                             | 9: single-copy homozygote                 |
| 16111444        | 1.30               | 1                     | 4              | 2.20               | 1                                             | 4: single-copy homozygote                 |
| 16111502        | 1.33               | 1                     | 1              | 1.90               | 1                                             | 1: single-copy homozygote                 |
| 16121181        | 1.15               | 1                     | 4              | 2.40               | 1                                             | 4: single-copy homozygote                 |
| 16121182        | 0.86               | 1                     | 5              | 1.99               | 1                                             | 5: single-copy homozygote                 |



| Transgenic Line | T <sub>0</sub>     |                       | T <sub>1</sub> |                    |                                               | T <sub>2</sub>                            |
|-----------------|--------------------|-----------------------|----------------|--------------------|-----------------------------------------------|-------------------------------------------|
|                 | Ratio (target/ref) | Estimated Copy Number | Homozygote No. | Ratio (target/ref) | Estimated Copy Number of T <sub>0</sub> Plant | Verification of T <sub>1</sub> Homozygote |
| 16121185        | 1.26               | 1                     | 21             | 1.95               | 1                                             | 21: single-copy homozygote                |
| 16130513        | 1.01               | 1                     | 9              | 2.03               | 1                                             | 9: single-copy homozygote                 |
| 16160010        | 1.19               | 1                     | 8              | 2.30               | 1                                             | 8: single-copy homozygote                 |
| 16160056        | 1.33               | 1                     | 14             | 2.12               | 1                                             | 14: single-copy homozygote                |
| 16160058        | 1.24               | 1                     | 4              | 3.77               | 2                                             | 4: two-copy homozygote                    |
| 16130011        | 0.60               | 1                     | 3              | 1.94               | 1                                             | 3: single-copy homozygote                 |
| 16130170        | 1.11               | 1                     | 13             | 2.09               | 1                                             | 13: single-copy homozygote                |
| 16210018        | 1.25               | 1                     | 7              | 1.91               | 1                                             | 7: single-copy homozygote                 |
| 16210056        | 1.15               | 1                     | 9              | 2.25               | 1                                             | 9: single-copy homozygote                 |
| 16210057        | 1.37               | 1                     | 16             | 2.16               | 1                                             | 16: single-copy homozygote                |
| 16210060        | 1.27               | 1                     | 6              | 1.91               | 1                                             | 6: single-copy homozygote                 |
| 16110667        | 1.24               | 1                     | 17             | 2.05               | 1                                             | 17: single-copy homozygote                |
| 16110695        | 0.85               | 1                     | 13             | 2.05               | 1                                             | 13: single-copy homozygote                |
| 16111351        | 1.37               | 1                     | 10             | 2.25               | 1                                             | 10: single-copy homozygote                |
| 16121224        | 1.21               | 1                     | 8              | 2.06               | 1                                             | 8: single-copy homozygote                 |
| 14340365        | 1.21               | 1                     | 10             | 2.13               | 1                                             | 10: single-copy homozygote                |
| 16140719        | 1.13               | 1                     | 12             | 2.01               | 1                                             | 12: single-copy homozygote                |
| 16111459        | 1.36               | 1                     | 2              | 2.08               | 1                                             | 2: single-copy homozygote                 |
| 16120220        | 1.23               | 1                     | 17             | 1.96               | 1                                             | 17: single-copy homozygote                |
| 16111108        | 1.24               | 1                     | 6              | 1.88               | 1                                             | 6: single-copy homozygote                 |

| Transgenic Line | T <sub>0</sub>     |                       | T <sub>1</sub> |                    |                                               | T <sub>2</sub>                            |
|-----------------|--------------------|-----------------------|----------------|--------------------|-----------------------------------------------|-------------------------------------------|
|                 | Ratio (target/ref) | Estimated Copy Number | Homozygote No. | Ratio (target/ref) | Estimated Copy Number of T <sub>0</sub> Plant | Verification of T <sub>1</sub> Homozygote |
| 16111109        | 1.06               | 1                     | 2              | 1.83               | 1                                             | 2: single-copy homozygote                 |
| 16111530        | 0.46               | 0                     | 7              | 1.87               | 1                                             | 7: single-copy homozygote                 |
| 16160406        | 1.30               | 1                     | 13             | 1.87               | 1                                             | 13: single-copy homozygote                |
| 16131207        | 1.39               | 1                     | 16             | 1.76               | 1                                             | 16: single-copy homozygote                |
| 14371185        | 0.94               | 1                     | 12             | 1.97               | 1                                             | 12: single-copy homozygote                |
| 16120260        | 1.16               | 1                     | 16             | 1.82               | 1                                             | 16: single-copy homozygote                |
| 16200074        | 1.06               | 1                     | 3              | 2.14               | 1                                             | 3: single-copy homozygote                 |
| 14381495        | 1.29               | 1                     | 21             | 2.22               | 1                                             | 21: single-copy homozygote                |
| 14381497        | 1.30               | 1                     | 9              | 2.02               | 1                                             | 9: single-copy homozygote                 |
| 14340491        | 1.11               | 1                     | 4              | 2.06               | 1                                             | 4: single-copy homozygote                 |
| 16111093        | 1.40               | 1                     | 15             | 2.04               | 1                                             | 15: single-copy homozygote                |
| 16111197        | 1.15               | 1                     | 14             | 2.00               | 1                                             | 14: single-copy homozygote                |
| 15441782        | 1.19               | 1                     | 10             | 1.95               | 1                                             | 10: single-copy homozygote                |
| 15100832        | 0.96               | 1                     | 6              | 2.03               | 1                                             | 6: single-copy homozygote                 |
| 15100846        | 1.13               | 1                     | 6              | 2.08               | 1                                             | 6: single-copy homozygote                 |
| 15170425        | 1.01               | 1                     | 6              | 2.14               | 1                                             | 6: single-copy homozygote                 |
| 15171242        | 1.18               | 1                     | 2              | 2.30               | 1                                             | 2: single-copy homozygote                 |
| 15180738        | 1.17               | 1                     | 13             | 2.33               | 1                                             | 13: single-copy homozygote                |
| 16120451        | 1.28               | 1                     | 4              | 2.04               | 1                                             | 4: single-copy homozygote                 |
| 16100041        | 1.00               | 1                     | 7              | 1.93               | 1                                             | 7: single-copy homozygote                 |

| Transgenic Line | T <sub>0</sub>     |                       | T <sub>1</sub> |                    |                                               | T <sub>2</sub>                            |
|-----------------|--------------------|-----------------------|----------------|--------------------|-----------------------------------------------|-------------------------------------------|
|                 | Ratio (target/ref) | Estimated Copy Number | Homozygote No. | Ratio (target/ref) | Estimated Copy Number of T <sub>0</sub> Plant | Verification of T <sub>1</sub> Homozygote |
| 16100087        | 1.19               | 1                     | 11             | 2.01               | 1                                             | 11: single-copy homozygote                |
| 16100089        | 1.03               | 1                     | 9              | 1.99               | 1                                             | 9: single-copy homozygote                 |
| 16100091        | 1.13               | 1                     | 7              | 1.97               | 1                                             | 7: single-copy homozygote                 |
| 16110223        | 1.10               | 1                     | 10             | 1.91               | 1                                             | 10: single-copy homozygote                |
| 16110255        | 1.33               | 1                     | 1              | 1.77               | 1                                             | 1: single-copy homozygote                 |
| 16130399        | 1.33               | 1                     | 6              | 2.11               | 1                                             | 6: single-copy homozygote                 |
| 15160877        | 1.08               | 1                     | 5              | 1.96               | 1                                             | 5: single-copy homozygote                 |
| 15200052        | 1.18               | 1                     | 9              | 1.85               | 1                                             | 9: single-copy homozygote                 |
| 15211035        | 0.81               | 1                     | 6              | 1.80               | 1                                             | 6: single-copy homozygote                 |
| 15410021        | 1.20               | 1                     | 14             | 2.00               | 1                                             | 14: single-copy homozygote                |
| 15340092        | 1.34               | 1                     | 7              | 3.94               | 2                                             | 7: two-copy homozygote                    |
| 15360071        | 1.30               | 1                     | 16             | 1.99               | 1                                             | 16: single-copy homozygote                |
| 16140935        | 1.33               | 1                     | 13             | 2.02               | 1                                             | 13: single-copy homozygote                |
| 16120356        | 1.10               | 1                     | 1              | 1.99               | 1                                             | 1: single-copy homozygote                 |
| 15481037        | 1.13               | 1                     | 4              | 1.93               | 1                                             | 4: single-copy homozygote                 |
| 16030239        | 1.16               | 1                     | 13             | 2.03               | 1                                             | 13: single-copy homozygote                |
| 16030311        | 1.16               | 1                     | 1              | 2.03               | 1                                             | 1: single-copy homozygote                 |
| 15160020        | 1.02               | 1                     | 14             | 2.24               | 1                                             | 14: single-copy homozygote                |
| 15160028        | 1.01               | 1                     | 8              | 2.03               | 1                                             | 8: single-copy homozygote                 |
| 15140965        | 1.05               | 1                     | 8              | 2.29               | 1                                             | 8: single-copy homozygote                 |

| Transgenic Line | T <sub>0</sub>     |                       | T <sub>1</sub> |                    |                                               | T <sub>2</sub>                            |
|-----------------|--------------------|-----------------------|----------------|--------------------|-----------------------------------------------|-------------------------------------------|
|                 | Ratio (target/ref) | Estimated Copy Number | Homozygote No. | Ratio (target/ref) | Estimated Copy Number of T <sub>0</sub> Plant | Verification of T <sub>1</sub> Homozygote |
| 15490018        | 1.18               | 1                     | 7              | 2.03               | 1                                             | 7: single-copy homozygote                 |
| 15170676        | 1.03               | 1                     | 3              | 1.85               | 1                                             | 3: single-copy homozygote                 |
| 15181309        | 1.16               | 1                     | 11             | 2.09               | 1                                             | 11: single-copy homozygote                |
| 16131638        | 1.18               | 1                     | 7              | 2.06               | 1                                             | 7: single-copy homozygote                 |
| 16120427        | 1.37               | 1                     | 1              | 2.05               | 1                                             | 1: single-copy homozygote                 |
| 16240427        | 1.32               | 1                     | 2              | 2.01               | 1                                             | 2: single-copy homozygote                 |
| 16141276        | 1.26               | 1                     | 2              | 1.97               | 1                                             | 2: single-copy homozygote                 |
| 16210591        | 1.19               | 1                     | 6              | 2.05               | 1                                             | 6: single-copy homozygote                 |
| 16230455        | 0.91               | 1                     | 2              | 2.19               | 1                                             | 2: single-copy homozygote                 |
| 16240408        | 0.79               | 1                     | 2              | 2.47               | 1                                             | 2: single-copy homozygote                 |
| 16160199        | 0.86               | 1                     | 4              | 1.96               | 1                                             | 4: single-copy homozygote                 |
| 16160255        | 1.17               | 1                     | 13             | 1.98               | 1                                             | 13: single-copy homozygote                |
| 16190764        | 1.11               | 1                     | 13             | 2.02               | 1                                             | 13: single-copy homozygote                |
| 16230297        | 1.28               | 1                     | 4              | 2.07               | 1                                             | 4: single-copy homozygote                 |
| 16130340        | 1.11               | 1                     | 7              | 2.02               | 1                                             | 7: single-copy homozygote                 |
| 16100728        | 1.30               | 1                     | 10             | 1.88               | 1                                             | 10: single-copy homozygote                |
| 16100729        | 1.29               | 1                     | 16             | 1.94               | 1                                             | 16: single-copy homozygote                |
| 16100825        | 1.29               | 1                     | 3              | 1.91               | 1                                             | 3: single-copy homozygote                 |
| 16110251        | 1.30               | 1                     | 3              | 2.05               | 1                                             | 3: single-copy homozygote                 |
| 16100789        | 1.24               | 1                     | 3              | 1.98               | 1                                             | 3: single-copy homozygote                 |

| Transgenic Line | T <sub>0</sub>     |                       | T <sub>1</sub> |                    |                                               | T <sub>2</sub>                            |
|-----------------|--------------------|-----------------------|----------------|--------------------|-----------------------------------------------|-------------------------------------------|
|                 | Ratio (target/ref) | Estimated Copy Number | Homozygote No. | Ratio (target/ref) | Estimated Copy Number of T <sub>0</sub> Plant | Verification of T <sub>1</sub> Homozygote |
| 16110260        | 1.11               | 1                     | 6              | 2.17               | 1                                             | 6: single-copy homozygote                 |
| 14370707        | 1.03               | 1                     | 6              | 2.06               | 1                                             | 6: single-copy homozygote                 |
| 16131030        | 0.90               | 1                     | 3              | 2.10               | 1                                             | 3: single-copy homozygote                 |
| 16260052        | 0.9                | 1                     | 3              | 1.88               | 1                                             | 3: single-copy homozygote                 |
| 16250156        | 0.62               | 1                     | 4              | 2.10               | 1                                             | 4: single-copy homozygote                 |
| 15181067        | 0.79               | 1                     | 10             | 2.08               | 1                                             | 10: single-copy homozygote                |
| 15160352        | 1.13               | 1                     | 8              | 2.43               | 1                                             | 8: single-copy homozygote                 |
| 15181066        | 1.14               | 1                     | 6              | 1.99               | 1                                             | 6: single-copy homozygote                 |
| 15190363        | 1.13               | 1                     | 14             | 2.02               | 1                                             | 14: single-copy homozygote                |
| 16100809        | 1.18               | 1                     | 10             | 2.04               | 1                                             | 10: single-copy homozygote                |
| 15511024        | 1.04               | 1                     | 2              | 2.01               | 1                                             | 2: single-copy homozygote                 |
| 15370534        | 1.31               | 1                     | 8              | 1.85               | 1                                             | 8: single-copy homozygote                 |
| 16131497        | 1.27               | 1                     | 8              | 2.01               | 1                                             | 8: single-copy homozygote                 |
| 16131531        | 1.19               | 1                     | 3              | 1.95               | 1                                             | 3: single-copy homozygote                 |
| 16111626        | 1.28               | 1                     | 7              | 2.12               | 1                                             | 7: single-copy homozygote                 |
| 15410443        | 1.13               | 1                     | 7              | 1.94               | 1                                             | 7: single-copy homozygote                 |
| 15410513        | 1.10               | 1                     | 7              | 1.90               | 1                                             | 7: single-copy homozygote                 |
| 15432042        | 1.22               | 1                     | 4              | 1.99               | 1                                             | 4: single-copy homozygote                 |
| 15432016        | 1.31               | 1                     | 13             | 2.04               | 1                                             | 13: single-copy homozygote                |
| 16161149        | 0.92               | 1                     | 7              | 2.15               | 1                                             | 7: single-copy homozygote                 |

| Transgenic Line | T <sub>0</sub>     |                       | T <sub>1</sub> |                    |                                               | T <sub>2</sub>                            |
|-----------------|--------------------|-----------------------|----------------|--------------------|-----------------------------------------------|-------------------------------------------|
|                 | Ratio (target/ref) | Estimated Copy Number | Homozygote No. | Ratio (target/ref) | Estimated Copy Number of T <sub>0</sub> Plant | Verification of T <sub>1</sub> Homozygote |
| 16080310        | 0.78               | 1                     | 3              | 3.91               | 2                                             | 3: two-copy homozygote                    |
| 15480621        | 1.21               | 1                     | 4              | 2.14               | 1                                             | 4: single-copy homozygote                 |
| 15431683        | 1.32               | 1                     | 11             | 2.01               | 1                                             | 11: single-copy homozygote                |
| 15400816        | 1.33               | 1                     | 3              | 1.95               | 1                                             | 3: single-copy homozygote                 |
| 15460020        | 0.73               | 1                     | 6              | 4.28               | 2                                             | 6: two-copy homozygote                    |
| 15230227        | 1.01               | 1                     | 16             | 1.99               | 1                                             | 16: single-copy homozygote                |
| 15240077        | 1.12               | 1                     | 10             | 2.00               | 1                                             | 10: single-copy homozygote                |
| 15170126        | 1.14               | 1                     | 13             | 2.13               | 1                                             | 13: single-copy homozygote                |
| 15170156        | 1.12               | 1                     | 5              | 1.89               | 1                                             | 5: single-copy homozygote                 |
| 15190151        | 1.11               | 1                     | 3              | 2.07               | 1                                             | 3: single-copy homozygote                 |
| 15190183        | 1.32               | 1                     | 7              | 1.93               | 1                                             | 7: single-copy homozygote                 |
| 15190204        | 1.01               | 1                     | 2              | 3.63               | 2                                             | 2: two-copy homozygote                    |
| 15170091        | 1.01               | 1                     | 15             | 1.96               | 1                                             | 15: single-copy homozygote                |
| 15170205        | 1.05               | 1                     | 8              | 1.93               | 1                                             | 8: single-copy homozygote                 |
| 15520099        | 0.94               | 1                     | 8              | 2.03               | 1                                             | 8: single-copy homozygote                 |
| 15520507        | 1.04               | 1                     | 2              | 1.85               | 1                                             | 2: single-copy homozygote                 |
| 16030636        | 1.10               | 1                     | 1              | 1.92               | 1                                             | 1: single-copy homozygote                 |
| 16030675        | 1.10               | 1                     | 15             | 2.04               | 1                                             | 15: single-copy homozygote                |
| 16030680        | 1.09               | 1                     | 9              | 1.97               | 1                                             | 9: single-copy homozygote                 |
| 15490753        | 1.16               | 1                     | 10             | 2.00               | 1                                             | 10: single-copy homozygote                |

| Transgenic Line | T <sub>0</sub>     |                       | T <sub>1</sub> |                    |                                               | T <sub>2</sub>                            |
|-----------------|--------------------|-----------------------|----------------|--------------------|-----------------------------------------------|-------------------------------------------|
|                 | Ratio (target/ref) | Estimated Copy Number | Homozygote No. | Ratio (target/ref) | Estimated Copy Number of T <sub>0</sub> Plant | Verification of T <sub>1</sub> Homozygote |
| 15510457        | 0.71               | 1                     | 3              | 1.97               | 1                                             | 3: single-copy homozygote                 |
| 15520341        | 0.76               | 1                     | 3              | 2.13               | 1                                             | 3: single-copy homozygote                 |
| 16010168        | 1.29               | 1                     | 4              | 1.99               | 1                                             | 4: single-copy homozygote                 |
| 16020368        | 1.39               | 1                     | 7              | 1.98               | 1                                             | 7: single-copy homozygote                 |
| 15490696        | 1.18               | 1                     | 13             | 2.00               | 1                                             | 13: single-copy homozygote                |
| 15520389        | 0.73               | 1                     | 7              | 2.09               | 1                                             | 7: single-copy homozygote                 |
| 16030054        | 1.01               | 1                     | 16             | 1.91               | 1                                             | 16: single-copy homozygote                |
| 16040400        | 1.22               | 1                     | 8              | 2.00               | 1                                             | 8: single-copy homozygote                 |
| 15410419        | 0.89               | 1                     | 12             | 1.96               | 1                                             | 12: single-copy homozygote                |
| 15410420        | 1.17               | 1                     | 17             | 2.03               | 1                                             | 17: single-copy homozygote                |
| 15430708        | 1.39               | 1                     | 2              | 1.85               | 1                                             | 2: single-copy homozygote                 |
| 15400197        | 1.16               | 1                     | 7              | 2.02               | 1                                             | 7: single-copy homozygote                 |
| 15452160        | 1.34               | 1                     | 10             | 2.03               | 1                                             | 10: single-copy homozygote                |
| 15441604        | 1.37               | 1                     | 14             | 1.97               | 1                                             | 14: single-copy homozygote                |
| 16100200        | 1.11               | 1                     | 18             | 2.03               | 1                                             | 18: single-copy homozygote                |
| 16100234        | 1.36               | 1                     | 14             | 2.00               | 1                                             | 14: single-copy homozygote                |
| 16100584        | 1.30               | 1                     | 4              | 2.04               | 1                                             | 4: single-copy homozygote                 |
| 16100617        | 1.29               | 1                     | 16             | 1.95               | 1                                             | 16: single-copy homozygote                |
| 16100673        | 1.04               | 1                     | 9              | 1.93               | 1                                             | 9: single-copy homozygote                 |
| 16131988        | 1.38               | 1                     | 20             | 2.02               | 1                                             | 20: single-copy homozygote                |

| Transgenic Line | T <sub>0</sub>     |                       | T <sub>1</sub> |                    |                                               | T <sub>2</sub>                            |
|-----------------|--------------------|-----------------------|----------------|--------------------|-----------------------------------------------|-------------------------------------------|
|                 | Ratio (target/ref) | Estimated Copy Number | Homozygote No. | Ratio (target/ref) | Estimated Copy Number of T <sub>0</sub> Plant | Verification of T <sub>1</sub> Homozygote |
| 14430342        | 1.22               | 1                     | 5              | 1.97               | 1                                             | 5: single-copy homozygote                 |
| 14401335        | 1.26               | 1                     | 4              | 2.04               | 1                                             | 4: single-copy homozygote                 |
| 16130786        | 0.80               | 1                     | 6              | 1.91               | 1                                             | 6: single-copy homozygote                 |
| 16130844        | 1.21               | 1                     | 11             | 4.18               | 2                                             | 11: two-copy homozygote                   |
| 16090392        | 0.95               | 1                     | 4              | 1.98               | 1                                             | 4: single-copy homozygote                 |
| 16090396        | 1.30               | 1                     | 13             | 2.00               | 1                                             | 13: single-copy homozygote                |
| 16130707        | 1.39               | 1                     | 11             | 2.15               | 1                                             | 11: single-copy homozygote                |
| 16131870        | 1.25               | 1                     | 2              | 1.94               | 1                                             | 2: single-copy homozygote                 |
| 16111056        | 1.28               | 1                     | 4              | 1.98               | 1                                             | 4: single-copy homozygote                 |
| 16111559        | 1.21               | 1                     | 4              | 1.95               | 1                                             | 4: single-copy homozygote                 |
| 16111563        | 1.31               | 1                     | 10             | 1.89               | 1                                             | 10: single-copy homozygote                |
| 16131936        | 1.07               | 1                     | 6              | 2.12               | 1                                             | 6: single-copy homozygote                 |
| 16140987        | 0.94               | 1                     | 13             | 1.82               | 1                                             | 13: single-copy homozygote                |
| 16111062        | 1.33               | 1                     | 8              | 2.03               | 1                                             | 8: single-copy homozygote                 |
| 16111068        | 1.13               | 1                     | 11             | 2.26               | 1                                             | 11: single-copy homozygote                |
| 16120541        | 1.28               | 1                     | 6              | 4.19               | 2                                             | 6: two-copy homozygote                    |
| 15290336        | 1.37               | 1                     | 8              | 1.88               | 1                                             | 8: single-copy homozygote                 |
| 15350568        | 1.27               | 1                     | 15             | 2.05               | 1                                             | 15: single-copy homozygote                |
| 15300410        | 1.19               | 1                     | 2              | 1.84               | 1                                             | 2: single-copy homozygote                 |
| 16120504        | 0.73               | 1                     | 6              | 2.12               | 1                                             | 6: single-copy homozygote                 |



| Transgenic Line | T <sub>0</sub>     |                       | T <sub>1</sub> |                    |                                               | T <sub>2</sub>                            |
|-----------------|--------------------|-----------------------|----------------|--------------------|-----------------------------------------------|-------------------------------------------|
|                 | Ratio (target/ref) | Estimated Copy Number | Homozygote No. | Ratio (target/ref) | Estimated Copy Number of T <sub>0</sub> Plant | Verification of T <sub>1</sub> Homozygote |
| 16131705        | 1.18               | 1                     | 11             | 2.29               | 1                                             | 11: single-copy homozygote                |
| 15290976        | 1.30               | 1                     | 1              | 2.01               | 1                                             | 1: single-copy homozygote                 |
| 15350337        | 1.15               | 1                     | 4              | 1.93               | 1                                             | 4: single-copy homozygote                 |
| 15320163        | 1.33               | 1                     | 4              | 2.02               | 1                                             | 4: single-copy homozygote                 |
| 15260518        | 1.20               | 1                     | 8              | 2.06               | 1                                             | 8: single-copy homozygote                 |
| 15260520        | 1.23               | 1                     | 1              | 2.00               | 1                                             | 1: single-copy homozygote                 |
| 15290541        | 1.32               | 1                     | 5              | 2.20               | 1                                             | 5: single-copy homozygote                 |
| 15290401        | 1.12               | 1                     | 17             | 2.04               | 1                                             | 17: single-copy homozygote                |
| 15290781        | 1.22               | 1                     | 6              | 1.99               | 1                                             | 6: single-copy homozygote                 |
| 15290751        | 1.34               | 1                     | 3              | 2.00               | 1                                             | 3: single-copy homozygote                 |
| 15300974        | 1.17               | 1                     | 15             | 2.02               | 1                                             | 15: single-copy homozygote                |
| 15290696        | 1.22               | 1                     | 7              | 1.88               | 1                                             | 7: single-copy homozygote                 |
| 15290338        | 1.37               | 1                     | 9              | 2.10               | 1                                             | 9: single-copy homozygote                 |
| 15290316        | 1.40               | 1                     | 1              | 2.13               | 1                                             | 1: single-copy homozygote                 |
| 15290305        | 1.28               | 1                     | 4              | 2.15               | 1                                             | 4: single-copy homozygote                 |
| 15330772        | 1.33               | 1                     | 2              | 2.06               | 1                                             | 2: single-copy homozygote                 |
| 15190237        | 1.31               | 1                     | 4              | 4.07               | 2                                             | 4: two-copy homozygote                    |
| 16100632        | 1.33               | 1                     | 7              | 1.91               | 1                                             | 7: single-copy homozygote                 |
| 16111329        | 1.10               | 1                     | 11             | 1.95               | 1                                             | 11: single-copy homozygote                |
| 15290983        | 1.16               | 1                     | 7              | 2.21               | 1                                             | 7: single-copy homozygote                 |

| Transgenic Line | T <sub>0</sub>     |                       | T <sub>1</sub> |                    |                                               | T <sub>2</sub>                            |
|-----------------|--------------------|-----------------------|----------------|--------------------|-----------------------------------------------|-------------------------------------------|
|                 | Ratio (target/ref) | Estimated Copy Number | Homozygote No. | Ratio (target/ref) | Estimated Copy Number of T <sub>0</sub> Plant | Verification of T <sub>1</sub> Homozygote |
| 15400391        | 1.13               | 1                     | 6              | 2.08               | 1                                             | 6: single-copy homozygote                 |
| 16140775        | 1.06               | 1                     | 3              | 2.44               | 1                                             | 3: single-copy homozygote                 |
| 15350655        | 1.23               | 1                     | 3              | 2.14               | 1                                             | 3: single-copy homozygote                 |
| 15360482        | 1.09               | 1                     | 1              | 1.97               | 1                                             | 1: single-copy homozygote                 |
| 15390629        | 1.35               | 1                     | 10             | 2.07               | 1                                             | 10: single-copy homozygote                |
| 15301224        | 1.28               | 1                     | 1              | 2.18               | 1                                             | 1: single-copy homozygote                 |
| 15400600        | 1.18               | 1                     | 11             | 1.88               | 1                                             | 11: single-copy homozygote                |
| 16131104        | 1.17               | 1                     | 2              | 2.32               | 1                                             | 2: single-copy homozygote                 |
| 16180570        | 1.20               | 1                     | 3              | 2.11               | 1                                             | 3: single-copy homozygote                 |
| 16120174        | 1.21               | 1                     | 2              | 2.03               | 1                                             | 2: single-copy homozygote                 |
| 16230621        | 1.25               | 1                     | 8              | 2.24               | 1                                             | 8: single-copy homozygote                 |
| 15360184        | 1.21               | 1                     | 4              | 2.23               | 1                                             | 4: single-copy homozygote                 |
| 16060135        | 1.28               | 1                     | 6              | 1.98               | 1                                             | 6: single-copy homozygote                 |
| 16060154        | 1.11               | 1                     | 5              | 2.00               | 1                                             | 5: single-copy homozygote                 |
| 15300320        | 1.21               | 1                     | 1              | 4.28               | 2                                             | 1: two-copy homozygote                    |
| 15330562        | 1.28               | 1                     | 15             | 1.94               | 1                                             | 15: single-copy homozygote                |
| 15350594        | 1.30               | 1                     | 2              | 1.90               | 1                                             | 2: single-copy homozygote                 |
| 15290404        | 1.36               | 1                     | 1              | 1.90               | 1                                             | 1: single-copy homozygote                 |
| 15311188        | 1.38               | 1                     | 12             | 2.12               | 1                                             | 12: single-copy homozygote                |
| 15290362        | 1.37               | 1                     | 5              | 1.86               | 1                                             | 5: single-copy homozygote                 |

| Transgenic Line | T <sub>0</sub>     |                       | T <sub>1</sub> |                    |                                               | T <sub>2</sub>                            |
|-----------------|--------------------|-----------------------|----------------|--------------------|-----------------------------------------------|-------------------------------------------|
|                 | Ratio (target/ref) | Estimated Copy Number | Homozygote No. | Ratio (target/ref) | Estimated Copy Number of T <sub>0</sub> Plant | Verification of T <sub>1</sub> Homozygote |
| 16210250        | 1.37               | 1                     | 2              | 1.90               | 1                                             | 2: single-copy homozygote                 |
| 16220096        | 1.3                | 1                     | 9              | 2.04               | 1                                             | 9: single-copy homozygote                 |
| 16250511        | 0.73               | 1                     | 2              | 2.05               | 1                                             | 2: single-copy homozygote                 |
| 16260261        | 0.86               | 1                     | 11             | 1.98               | 1                                             | 11: single-copy homozygote                |
| 16270395        | 1.09               | 1                     | 11             | 2.05               | 1                                             | 11: single-copy homozygote                |
| 15290607        | 1.35               | 1                     | 1              | 2.04               | 1                                             | 1: single-copy homozygote                 |
| 15300114        | 1.29               | 1                     | 8              | 2.00               | 1                                             | 8: single-copy homozygote                 |
| 15300093        | 1.39               | 1                     | 7              | 2.01               | 1                                             | 7: single-copy homozygote                 |
| 15331067        | 1.11               | 1                     | 2              | 2.17               | 1                                             | 2: single-copy homozygote                 |
| 15330388        | 1.30               | 1                     | 8              | 2.00               | 1                                             | 8: single-copy homozygote                 |
| 15350387        | 1.36               | 1                     | 3              | 1.94               | 1                                             | 3: single-copy homozygote                 |
| 15310404        | 0.95               | 1                     | 3              | 2.07               | 1                                             | 3: single-copy homozygote                 |
| 15310438        | 1.19               | 1                     | 6              | 2.00               | 1                                             | 6: single-copy homozygote                 |
| 15301112        | 1.29               | 1                     | 2              | 2.03               | 1                                             | 2: single-copy homozygote                 |
| 15350624        | 1.00               | 1                     | 9              | 1.96               | 1                                             | 9: single-copy homozygote                 |
| 15300580        | 0.97               | 1                     | 1              | 1.85               | 1                                             | 1: single-copy homozygote                 |
| 15310959        | 1.13               | 1                     | 3              | 1.98               | 1                                             | 3: single-copy homozygote                 |
| 15330805        | 1.01               | 1                     | 9              | 2.26               | 1                                             | 9: single-copy homozygote                 |
| 15330748        | 1.23               | 1                     | 1              | 2.30               | 1                                             | 1: single-copy homozygote                 |
| 15320257        | 1.14               | 1                     | 9              | 1.96               | 1                                             | 9: single-copy homozygote                 |

| Transgenic Line | T <sub>0</sub>     |                       | T <sub>1</sub> |                    |                                               | T <sub>2</sub>                            |
|-----------------|--------------------|-----------------------|----------------|--------------------|-----------------------------------------------|-------------------------------------------|
|                 | Ratio (target/ref) | Estimated Copy Number | Homozygote No. | Ratio (target/ref) | Estimated Copy Number of T <sub>0</sub> Plant | Verification of T <sub>1</sub> Homozygote |
| 15380403        | 0.68               | 1                     | 2              | 2.03               | 1                                             | 2: single-copy homozygote                 |
| 16131178        | 1.35               | 1                     | 8              | 2.03               | 1                                             | 8: single-copy homozygote                 |
| 16131194        | 1.18               | 1                     | 15             | 1.98               | 1                                             | 15: single-copy homozygote                |
| 16131172        | 0.91               | 1                     | 5              | 2.19               | 1                                             | 5: single-copy homozygote                 |
| 16200782        | 1.37               | 1                     | 8              | 1.88               | 1                                             | 8: single-copy homozygote                 |
| 16120443        | 1.28               | 1                     | 8              | 2.06               | 1                                             | 8: single-copy homozygote                 |
| 16131834        | 1.17               | 1                     | 5              | 2.06               | 1                                             | 5: single-copy homozygote                 |
| 16121138        | 1.06               | 1                     | 3              | 1.98               | 1                                             | 3: single-copy homozygote                 |
| 16121139        | 1.02               | 1                     | 8              | 2.08               | 1                                             | 8: single-copy homozygote                 |
| 16121145        | 1.19               | 1                     | 14             | 1.97               | 1                                             | 14: single-copy homozygote                |
| 16141253        | 1.32               | 1                     | 9              | 2.02               | 1                                             | 9: single-copy homozygote                 |
| 16120402        | 1.31               | 1                     | 10             | 2.13               | 1                                             | 10: single-copy homozygote                |
| 16131762        | 1.28               | 1                     | 6              | 2.25               | 1                                             | 6: single-copy homozygote                 |
| 16180502        | 1.28               | 1                     | 1              | 2.03               | 1                                             | 1: single-copy homozygote                 |
| 16180504        | 0.92               | 1                     | 14             | 1.98               | 1                                             | 14: single-copy homozygote                |
| 15390183        | 1.10               | 1                     | 5              | 1.94               | 1                                             | 5: single-copy homozygote                 |
| 15380616        | 0.46               | 0                     | 8              | 2.01               | 1                                             | 8: single-copy homozygote                 |
| 16040397        | 0.77               | 1                     | 7              | 2.28               | 1                                             | 7: single-copy homozygote                 |
| 16050537        | 1.36               | 1                     | 6              | 2.08               | 1                                             | 6: single-copy homozygote                 |
| 16060145        | 1.13               | 1                     | 3              | 2.06               | 1                                             | 3: single-copy homozygote                 |

| Transgenic Line | T <sub>0</sub>     |                       | T <sub>1</sub> |                    |                                               | T <sub>2</sub>                            |
|-----------------|--------------------|-----------------------|----------------|--------------------|-----------------------------------------------|-------------------------------------------|
|                 | Ratio (target/ref) | Estimated Copy Number | Homozygote No. | Ratio (target/ref) | Estimated Copy Number of T <sub>0</sub> Plant | Verification of T <sub>1</sub> Homozygote |
| 16060157        | 1.13               | 1                     | 6              | 2.01               | 1                                             | 6: single-copy homozygote                 |
| 15410595        | 1.19               | 1                     | 3              | 1.99               | 1                                             | 3: single-copy homozygote                 |
| 15461156        | 1.34               | 1                     | 3              | 1.98               | 1                                             | 3: single-copy homozygote                 |
| 15400328        | 1.30               | 1                     | 22             | 2.09               | 1                                             | 22: single-copy homozygote                |
| 15441532        | 1.37               | 1                     | 3              | 2.02               | 1                                             | 3: single-copy homozygote                 |
| 15441556        | 1.18               | 1                     | 3              | 2.19               | 1                                             | 3: single-copy homozygote                 |
| 15520495        | 0.89               | 1                     | 6              | 1.98               | 1                                             | 6: single-copy homozygote                 |
| 15430141        | 1.33               | 1                     | 3              | 2.01               | 1                                             | 3: single-copy homozygote                 |
| 15481379        | 1.16               | 1                     | 17             | 1.91               | 1                                             | 17: single-copy homozygote                |
| 15440117        | 1.31               | 1                     | 5              | 2.29               | 1                                             | 5: single-copy homozygote                 |
| 15440137        | 1.17               | 1                     | 11             | 2.00               | 1                                             | 11: single-copy homozygote                |
| 15431089        | 1.13               | 1                     | 21             | 1.91               | 1                                             | 21: single-copy homozygote                |
| 15470109        | 1.09               | 1                     | 12             | 2.05               | 1                                             | 12: single-copy homozygote                |
| 16010268        | 1.23               | 1                     | 3              | 2.17               | 1                                             | 3: single-copy homozygote                 |
| 15360150        | 1.18               | 1                     | 5              | 1.97               | 1                                             | 5: single-copy homozygote                 |
| 15340116        | 1.15               | 1                     | 4              | 2.18               | 1                                             | 4: single-copy homozygote                 |
| 15330648        | 1.32               | 1                     | 17             | 2.02               | 1                                             | 17: single-copy homozygote                |
| 15340090        | 1.34               | 1                     | 5              | 2.27               | 1                                             | 5: single-copy homozygote                 |
| 15340060        | 1.21               | 1                     | 15             | 2.20               | 1                                             | 15: single-copy homozygote                |
| 16060190        | 1.10               | 1                     | 11             | 2.15               | 1                                             | 11: single-copy homozygote                |

| Transgenic Line | T <sub>0</sub>     |                       | T <sub>1</sub> |                    |                                               | T <sub>2</sub>                            |
|-----------------|--------------------|-----------------------|----------------|--------------------|-----------------------------------------------|-------------------------------------------|
|                 | Ratio (target/ref) | Estimated Copy Number | Homozygote No. | Ratio (target/ref) | Estimated Copy Number of T <sub>0</sub> Plant | Verification of T <sub>1</sub> Homozygote |
| 16070073        | 1.32               | 1                     | 7              | 2.27               | 1                                             | 7: single-copy homozygote                 |
| 16110781        | 1.30               | 1                     | 7              | 1.96               | 1                                             | 7: single-copy homozygote                 |
| 16131099        | 1.19               | 1                     | 9              | 1.92               | 1                                             | 9: single-copy homozygote                 |
| 16140744        | 1.13               | 1                     | 11             | 2.00               | 1                                             | 11: single-copy homozygote                |
| 16100476        | 1.21               | 1                     | 3              | 1.91               | 1                                             | 3: single-copy homozygote                 |
| 16131139        | 1.33               | 1                     | 1              | 2.12               | 1                                             | 1: single-copy homozygote                 |
| 16100627        | 1.25               | 1                     | 7              | 2.28               | 1                                             | 7: single-copy homozygote                 |
| 16100629        | 0.87               | 1                     | 4              | 2.26               | 1                                             | 4: single-copy homozygote                 |
| 16100653        | 1.31               | 1                     | 7              | 2.37               | 1                                             | 7: single-copy homozygote                 |
| 16111254        | 1.24               | 1                     | 12             | 2.08               | 1                                             | 12: single-copy homozygote                |
| 16111255        | 1.12               | 1                     | 9              | 2.16               | 1                                             | 9: single-copy homozygote                 |
| 16120045        | 1.09               | 1                     | 21             | 2.02               | 1                                             | 21: single-copy homozygote                |
| 16110474        | 1.03               | 1                     | 4              | 1.95               | 1                                             | 4: single-copy homozygote                 |
| 16121319        | 1.38               | 1                     | 13             | 1.92               | 1                                             | 13: single-copy homozygote                |
| 16190251        | 1.24               | 1                     | 17             | 2.12               | 1                                             | 17: single-copy homozygote                |
| 16200459        | 1.15               | 1                     | 10             | 1.92               | 1                                             | 10: single-copy homozygote                |
| 16210198        | 1.07               | 1                     | 11             | 1.88               | 1                                             | 11: single-copy homozygote                |
| 16130269        | 1.36               | 1                     | 9              | 1.90               | 1                                             | 9: single-copy homozygote                 |
| 16140080        | 1.13               | 1                     | 2              | 2.18               | 1                                             | 2: single-copy homozygote                 |
| 16100707        | 1.15               | 1                     | 7              | 2.17               | 1                                             | 7: single-copy homozygote                 |

| Transgenic Line | T <sub>0</sub>     |                       | T <sub>1</sub> |                    |                                               | T <sub>2</sub>                            |
|-----------------|--------------------|-----------------------|----------------|--------------------|-----------------------------------------------|-------------------------------------------|
|                 | Ratio (target/ref) | Estimated Copy Number | Homozygote No. | Ratio (target/ref) | Estimated Copy Number of T <sub>0</sub> Plant | Verification of T <sub>1</sub> Homozygote |
| 16180321        | 1.04               | 1                     | 6              | 1.98               | 1                                             | 6: single-copy homozygote                 |
| 16140134        | 1.34               | 1                     | 2              | 2.19               | 1                                             | 2: single-copy homozygote                 |
| 16160528        | 1.10               | 1                     | 18             | 1.96               | 1                                             | 18: single-copy homozygote                |
| 16121358        | 1.18               | 1                     | 4              | 2.15               | 1                                             | 4: single-copy homozygote                 |
| 16100842        | 1.10               | 1                     | 7              | 2.39               | 1                                             | 7: single-copy homozygote                 |
| 16130810        | 0.75               | 1                     | 5              | 2.04               | 1                                             | 5: single-copy homozygote                 |
| 16140424        | 1.28               | 1                     | 16             | 2.30               | 1                                             | 16: single-copy homozygote                |
| 16131864        | 1.13               | 1                     | 4              | 1.92               | 1                                             | 4: single-copy homozygote                 |
| 16131868        | 1.20               | 1                     | 24             | 1.98               | 1                                             | 24: single-copy homozygote                |
| 16141228        | 1.35               | 1                     | 12             | 2.32               | 1                                             | 12: single-copy homozygote                |
| 16160857        | 1.32               | 1                     | 3              | 1.98               | 1                                             | 3: single-copy homozygote                 |
| 16121155        | 1.04               | 1                     | 13             | 2.01               | 1                                             | 13: single-copy homozygote                |
| 16160901        | 1.28               | 1                     | 1              | 2.12               | 1                                             | 1: single-copy homozygote                 |
| 16140277        | 1.36               | 1                     | 3              | 1.99               | 1                                             | 3: single-copy homozygote                 |
| 16140363        | 1.00               | 1                     | 16             | 1.92               | 1                                             | 16: single-copy homozygote                |
| 16190017        | 1.27               | 1                     | 18             | 2.03               | 1                                             | 18: single-copy homozygote                |
| 16141011        | 0.96               | 1                     | 5              | 1.99               | 1                                             | 5: single-copy homozygote                 |
| 16100768        | 1.35               | 1                     | 4              | 2.04               | 1                                             | 4: single-copy homozygote                 |
| 16121435        | 1.37               | 1                     | 17             | 1.96               | 1                                             | 17: single-copy homozygote                |
| 16200389        | 1.29               | 1                     | 10             | 2.03               | 1                                             | 10: single-copy homozygote                |

| Transgenic Line | T <sub>0</sub>     |                       | T <sub>1</sub> |                    |                                               | T <sub>2</sub>                            |
|-----------------|--------------------|-----------------------|----------------|--------------------|-----------------------------------------------|-------------------------------------------|
|                 | Ratio (target/ref) | Estimated Copy Number | Homozygote No. | Ratio (target/ref) | Estimated Copy Number of T <sub>0</sub> Plant | Verification of T <sub>1</sub> Homozygote |
| 16210185        | 1.10               | 1                     | 1              | 2.09               | 1                                             | 1: single-copy homozygote                 |
| 16190121        | 1.11               | 1                     | 17             | 2.03               | 1                                             | 17: single-copy homozygote                |
| 16190496        | 1.36               | 1                     | 1              | 2.01               | 1                                             | 1: single-copy homozygote                 |
| 16190507        | 1.18               | 1                     | 9              | 2.03               | 1                                             | 9: single-copy homozygote                 |
| 16200158        | 0.93               | 1                     | 13             | 2.02               | 1                                             | 13: single-copy homozygote                |
| 16210311        | 0.66               | 1                     | 3              | 1.97               | 1                                             | 3: single-copy homozygote                 |
| 16141076        | 1.02               | 1                     | 4              | 2.03               | 1                                             | 4: single-copy homozygote                 |
| 16110228        | 1.20               | 1                     | 16             | 1.97               | 1                                             | 16: single-copy homozygote                |
| 16200270        | 1.10               | 1                     | 12             | 1.98               | 1                                             | 12: single-copy homozygote                |
| 16210368        | 1.14               | 1                     | 15             | 2.00               | 1                                             | 15: single-copy homozygote                |
| 16230618        | 0.93               | 1                     | 1              | 1.84               | 1                                             | 1: single-copy homozygote                 |
| 16260086        | 0.98               | 1                     | 11             | 1.86               | 1                                             | 11: single-copy homozygote                |
| 16160235        | 1.12               | 1                     | 15             | 1.95               | 1                                             | 15: single-copy homozygote                |
| 16160725        | 1.26               | 1                     | 9              | 1.95               | 1                                             | 9: single-copy homozygote                 |
| 16200469        | 1.02               | 1                     | 11             | 1.95               | 1                                             | 11: single-copy homozygote                |
| 16200521        | 1.27               | 1                     | 1              | 1.98               | 1                                             | 1: single-copy homozygote                 |
| 16200531        | 1.06               | 1                     | 10             | 2.08               | 1                                             | 10: single-copy homozygote                |
| 16200549        | 0.99               | 1                     | 8              | 1.91               | 1                                             | 8: single-copy homozygote                 |
| 16200544        | 1.26               | 1                     | 2              | 2.01               | 1                                             | 2: single-copy homozygote                 |
| 16200552        | 1.19               | 1                     | 4              | 2.02               | 1                                             | 4: single-copy homozygote                 |



| Transgenic Line | T <sub>0</sub>     |                       | T <sub>1</sub> |                    |                                               | T <sub>2</sub>                            |
|-----------------|--------------------|-----------------------|----------------|--------------------|-----------------------------------------------|-------------------------------------------|
|                 | Ratio (target/ref) | Estimated Copy Number | Homozygote No. | Ratio (target/ref) | Estimated Copy Number of T <sub>0</sub> Plant | Verification of T <sub>1</sub> Homozygote |
| 16210112        | 1.08               | 1                     | 4              | 2.03               | 1                                             | 4: single-copy homozygote                 |
| 16210113        | 1.1                | 1                     | 5              | 1.92               | 1                                             | 5: single-copy homozygote                 |
| 16210140        | 1.28               | 1                     | 8              | 1.87               | 1                                             | 8: single-copy homozygote                 |
| 16240176        | 1.31               | 1                     | 1              | 1.93               | 1                                             | 1: single-copy homozygote                 |
| 16170009        | 1.31               | 1                     | 1              | 1.89               | 1                                             | 1: single-copy homozygote                 |
| 16200290        | 0.99               | 1                     | 1              | 1.97               | 1                                             | 1: single-copy homozygote                 |
| 16200291        | 1.10               | 1                     | 12             | 1.91               | 1                                             | 12: single-copy homozygote                |
| 15090254        | 1.05               | 1                     | 12             | 1.97               | 1                                             | 12: single-copy homozygote                |
| 16200298        | 1.04               | 1                     | 1              | 1.88               | 1                                             | 1: single-copy homozygote                 |
| 15250362        | 1.38               | 1                     | 8              | 2.24               | 1                                             | 8: single-copy homozygote                 |
| 15270364        | 1.38               | 1                     | 8              | 2.12               | 1                                             | 8: single-copy homozygote                 |
| 16190821        | 1.33               | 1                     | 11             | 1.84               | 1                                             | 11: single-copy homozygote                |
| 16200679        | 1.18               | 1                     | 3              | 1.99               | 1                                             | 3: single-copy homozygote                 |
| 16240548        | 1.34               | 1                     | 3              | 1.96               | 1                                             | 3: single-copy homozygote                 |
| 16230561        | 1.17               | 1                     | 4              | 2.08               | 1                                             | 4: single-copy homozygote                 |
| 16270176        | 1.16               | 1                     | 7              | 2.13               | 1                                             | 7: single-copy homozygote                 |
| 16270204        | 0.98               | 1                     | 13             | 2.11               | 1                                             | 13: single-copy homozygote                |
| 16270205        | 0.94               | 1                     | 12             | 1.96               | 1                                             | 12: single-copy homozygote                |
| 16270260        | 1.2                | 1                     | 10             | 1.89               | 1                                             | 10: single-copy homozygote                |
| 16200935        | 1.19               | 1                     | 2              | 1.99               | 1                                             | 2: single-copy homozygote                 |

| Transgenic Line | T <sub>0</sub>     |                       | T <sub>1</sub> |                    |                                               | T <sub>2</sub>                            |
|-----------------|--------------------|-----------------------|----------------|--------------------|-----------------------------------------------|-------------------------------------------|
|                 | Ratio (target/ref) | Estimated Copy Number | Homozygote No. | Ratio (target/ref) | Estimated Copy Number of T <sub>0</sub> Plant | Verification of T <sub>1</sub> Homozygote |
| 16220373        | 1.28               | 1                     | 13             | 2.03               | 1                                             | 13: single-copy homozygote                |
| 16210512        | 1.13               | 1                     | 12             | 1.93               | 1                                             | 12: single-copy homozygote                |
| 16250490        | 1.27               | 1                     | 8              | 2.50               | 1                                             | 8: single-copy homozygote                 |
| 16220228        | 1.13               | 1                     | 10             | 1.91               | 1                                             | 10: single-copy homozygote                |
| 16250234        | 0.84               | 1                     | 3              | 1.92               | 1                                             | 3: single-copy homozygote                 |
| 16270187        | 1.15               | 1                     | 10             | 1.91               | 1                                             | 10: single-copy homozygote                |
| 16270295        | 1.03               | 1                     | 2              | 1.83               | 1                                             | 2: single-copy homozygote                 |
| 16270297        | 1.07               | 1                     | 8              | 1.93               | 1                                             | 8: single-copy homozygote                 |
| 16200375        | 1.10               | 1                     | 16             | 2.00               | 1                                             | 16: single-copy homozygote                |
| 16240247        | 1.13               | 1                     | 1              | 2.09               | 1                                             | 1: single-copy homozygote                 |
| 14360524        | 1.16               | 1                     | 10             | 2.15               | 1                                             | 10: single-copy homozygote                |
| 14370830        | 1.22               | 1                     | 12             | 2.04               | 1                                             | 12: single-copy homozygote                |
| 16230356        | 0.99               | 1                     | 2              | 1.86               | 1                                             | 2: single-copy homozygote                 |
| 16230374        | 1.27               | 1                     | 13             | 1.97               | 1                                             | 13: single-copy homozygote                |
| 16111202        | 1.28               | 1                     | 1              | 1.92               | 1                                             | 1: single-copy homozygote                 |
| 16080297        | 1.37               | 1                     | 15             | 2.08               | 1                                             | 15: single-copy homozygote                |
| 16080318        | 1.07               | 1                     | 5              | 2.02               | 1                                             | 5: single-copy homozygote                 |
| 16131200        | 1.08               | 1                     | 16             | 1.99               | 1                                             | 16: single-copy homozygote                |
| 16100565        | 1.18               | 1                     | 15             | 1.98               | 1                                             | 15: single-copy homozygote                |
| 14320376        | 1.37               | 1                     | 23             | 1.97               | 1                                             | 23: single-copy homozygote                |

| Transgenic Line | T <sub>0</sub>     |                       | T <sub>1</sub> |                    |                                               | T <sub>2</sub>                            |
|-----------------|--------------------|-----------------------|----------------|--------------------|-----------------------------------------------|-------------------------------------------|
|                 | Ratio (target/ref) | Estimated Copy Number | Homozygote No. | Ratio (target/ref) | Estimated Copy Number of T <sub>0</sub> Plant | Verification of T <sub>1</sub> Homozygote |
| 16080491        | 1.37               | 1                     | 1              | 2.04               | 1                                             | 1: single-copy homozygote                 |
| 16090128        | 1.33               | 1                     | 15             | 1.81               | 1                                             | 15: single-copy homozygote                |
| 16100055        | 1.39               | 1                     | 1              | 1.79               | 1                                             | 1: single-copy homozygote                 |
| 14310131        | 1.27               | 1                     | 3              | 2.06               | 1                                             | 3: single-copy homozygote                 |
| 14320250        | 1.38               | 1                     | 1              | 2.04               | 1                                             | 1: single-copy homozygote                 |
| 16090021        | 0.61               | 1                     | 16             | 1.97               | 1                                             | 16: single-copy homozygote                |
| 16090033        | 1.36               | 1                     | 5              | 2.00               | 1                                             | 5: single-copy homozygote                 |
| 16090042        | 1.29               | 1                     | 15             | 1.83               | 1                                             | 15: single-copy homozygote                |
| 16100481        | 0.85               | 1                     | 11             | 2.07               | 1                                             | 11: single-copy homozygote                |
| 16100491        | 1.19               | 1                     | 9              | 1.98               | 1                                             | 9: single-copy homozygote                 |
| 16100562        | 1.14               | 1                     | 16             | 2.01               | 1                                             | 16: single-copy homozygote                |
| 16140648        | 1.06               | 1                     | 13             | 2.07               | 1                                             | 13: single-copy homozygote                |
| 16090299        | 1.25               | 1                     | 11             | 1.99               | 1                                             | 11: single-copy homozygote                |
| 16090591        | 1.26               | 1                     | 3              | 2.07               | 1                                             | 3: single-copy homozygote                 |
| 16111332        | 1.18               | 1                     | 11             | 4.12               | 2                                             | 11: two-copy homozygote                   |
| 15081742        | 1.23               | 1                     | 4              | 2.04               | 1                                             | 4: single-copy homozygote                 |
| 16141230        | 1.39               | 1                     | 5              | 2.19               | 1                                             | 5: single-copy homozygote                 |
| 16141243        | 1.28               | 1                     | 10             | 2.09               | 1                                             | 10: single-copy homozygote                |
| 16120550        | 0.65               | 1                     | 1              | 1.95               | 1                                             | 1: single-copy homozygote                 |
| 16190725        | 1.30               | 1                     | 1              | 2.02               | 1                                             | 1: single-copy homozygote                 |

| Transgenic Line | T <sub>0</sub>     |                       | T <sub>1</sub> |                    |                                               | T <sub>2</sub>                            |
|-----------------|--------------------|-----------------------|----------------|--------------------|-----------------------------------------------|-------------------------------------------|
|                 | Ratio (target/ref) | Estimated Copy Number | Homozygote No. | Ratio (target/ref) | Estimated Copy Number of T <sub>0</sub> Plant | Verification of T <sub>1</sub> Homozygote |
| 15100420        | 1.13               | 1                     | 10             | 2.15               | 1                                             | 10: single-copy homozygote                |
| 15111048        | 1.10               | 1                     | 8              | 2.03               | 1                                             | 8: single-copy homozygote                 |
| 15120050        | 1.30               | 1                     | 9              | 2.02               | 1                                             | 9: single-copy homozygote                 |
| 15120449        | 1.12               | 1                     | 3              | 1.99               | 1                                             | 3: single-copy homozygote                 |
| 15120463        | 1.14               | 1                     | 18             | 2.01               | 1                                             | 18: single-copy homozygote                |
| 15250193        | 1.28               | 1                     | 3              | 2.00               | 1                                             | 3: single-copy homozygote                 |
| 15290460        | 1.32               | 1                     | 1              | 3.92               | 2                                             | 1: two-copy homozygote                    |
| 15290987        | 1.22               | 1                     | 1              | 2.18               | 1                                             | 1: single-copy homozygote                 |
| 15260496        | 1.12               | 1                     | 3              | 1.95               | 1                                             | 3: single-copy homozygote                 |
| 15220709        | 1.36               | 1                     | 2              | 2.14               | 1                                             | 2: single-copy homozygote                 |
| 16121617        | 1.25               | 1                     | 5              | 1.95               | 1                                             | 5: single-copy homozygote                 |
| 15300343        | 1.29               | 1                     | 1              | 2.09               | 1                                             | 1: single-copy homozygote                 |
| 15300396        | 1.40               | 1                     | 12             | 2.05               | 1                                             | 12: single-copy homozygote                |
| 15290413        | 1.38               | 1                     | 12             | 1.91               | 1                                             | 12: single-copy homozygote                |
| 15290267        | 0.72               | 1                     | 11             | 2.06               | 1                                             | 11: single-copy homozygote                |
| 15280502        | 1.07               | 1                     | 2              | 2.11               | 1                                             | 2: single-copy homozygote                 |
| 15290251        | 1.26               | 1                     | 3              | 2.13               | 1                                             | 3: single-copy homozygote                 |
| 15350510        | 1.22               | 1                     | 2              | 1.95               | 1                                             | 2: single-copy homozygote                 |
| 15310732        | 1.20               | 1                     | 2              | 1.92               | 1                                             | 2: single-copy homozygote                 |
| 15260235        | 1.11               | 1                     | 1              | 2.19               | 1                                             | 1: single-copy homozygote                 |

| Transgenic Line | T <sub>0</sub>     |                       | T <sub>1</sub> |                    |                                               | T <sub>2</sub>                            |
|-----------------|--------------------|-----------------------|----------------|--------------------|-----------------------------------------------|-------------------------------------------|
|                 | Ratio (target/ref) | Estimated Copy Number | Homozygote No. | Ratio (target/ref) | Estimated Copy Number of T <sub>0</sub> Plant | Verification of T <sub>1</sub> Homozygote |
| 15320998        | 0.98               | 1                     | 1              | 2.00               | 1                                             | 1: single-copy homozygote                 |
| 15260319        | 1.19               | 1                     | 3              | 2.02               | 1                                             | 3: single-copy homozygote                 |
| 15250038        | 1.33               | 1                     | 11             | 2.02               | 1                                             | 11: single-copy homozygote                |
| 16121020        | 1.29               | 1                     | 3              | 2.33               | 1                                             | 3: single-copy homozygote                 |
| 15321073        | 1.19               | 1                     | 11             | 2.13               | 1                                             | 11: single-copy homozygote                |
| 15300120        | 1.22               | 1                     | 7              | 2.09               | 1                                             | 7: single-copy homozygote                 |
| 15290127        | 1.30               | 1                     | 7              | 1.97               | 1                                             | 7: single-copy homozygote                 |
| 15300028        | 1.29               | 1                     | 6              | 1.98               | 1                                             | 6: single-copy homozygote                 |
| 15440929        | 1.20               | 1                     | 7              | 2.22               | 1                                             | 7: single-copy homozygote                 |
| 15462193        | 1.19               | 1                     | 7              | 2.28               | 1                                             | 7: single-copy homozygote                 |
| 15462220        | 0.55               | 1                     | 6              | 2.09               | 1                                             | 6: single-copy homozygote                 |
| 15470665        | 1.14               | 1                     | 1              | 2.32               | 1                                             | 1: single-copy homozygote                 |
| 15492234        | 1.06               | 1                     | 7              | 1.80               | 1                                             | 7: single-copy homozygote                 |
| 15310948        | 1.32               | 1                     | 2              | 2.10               | 1                                             | 2: single-copy homozygote                 |
| 15310559        | 1.17               | 1                     | 7              | 1.95               | 1                                             | 7: single-copy homozygote                 |
| 15310805        | 1.22               | 1                     | 12             | 2.12               | 1                                             | 12: single-copy homozygote                |
| 15310913        | 1.07               | 1                     | 2              | 2.22               | 1                                             | 2: single-copy homozygote                 |
| 15390095        | 0.93               | 1                     | 11             | 2.07               | 1                                             | 11: single-copy homozygote                |
| 15360661        | 1.23               | 1                     | 13             | 2.02               | 1                                             | 13: single-copy homozygote                |
| 15280291        | 1.37               | 1                     | 2              | 2.23               | 1                                             | 2: single-copy homozygote                 |

| Transgenic Line | T <sub>0</sub>     |                       | T <sub>1</sub> |                    |                                               | T <sub>2</sub>                            |
|-----------------|--------------------|-----------------------|----------------|--------------------|-----------------------------------------------|-------------------------------------------|
|                 | Ratio (target/ref) | Estimated Copy Number | Homozygote No. | Ratio (target/ref) | Estimated Copy Number of T <sub>0</sub> Plant | Verification of T <sub>1</sub> Homozygote |
| 15310518        | 0.74               | 1                     | 9              | 2.10               | 1                                             | 9: single-copy homozygote                 |
| 15310695        | 1.07               | 1                     | 3              | 1.96               | 1                                             | 3: single-copy homozygote                 |
| 15290035        | 1.19               | 1                     | 2              | 2.03               | 1                                             | 2: single-copy homozygote                 |
| 15380768        | 1.06               | 1                     | 1              | 1.97               | 1                                             | 1: single-copy homozygote                 |
| 15350744        | 1.09               | 1                     | 1              | 2.39               | 1                                             | 1: single-copy homozygote                 |
| 15300825        | 1.08               | 1                     | 4              | 1.97               | 1                                             | 4: single-copy homozygote                 |
| 15320975        | 0.96               | 1                     | 1              | 2.56               | 1                                             | 1: two-copy homozygote                    |
| 15311238        | 1.38               | 1                     | 14             | 2.12               | 1                                             | 14: single-copy homozygote                |
| 15350447        | 0.56               | 1                     | 2              | 3.96               | 2                                             | 2: two-copy homozygote                    |
| 15350608        | 0.75               | 1                     | 4              | 2.20               | 1                                             | 4: single-copy homozygote                 |
| 16100810        | 1.05               | 1                     | 1              | 2.37               | 1                                             | 1: single-copy homozygote                 |
| 16100730        | 1.16               | 1                     | 3              | 2.01               | 1                                             | 3: single-copy homozygote                 |
| 16110049        | 1.19               | 1                     | 1              | 1.89               | 1                                             | 1: single-copy homozygote                 |
| 16110050        | 1.20               | 1                     | 10             | 2.11               | 1                                             | 10: single-copy homozygote                |
| 16190925        | 1.31               | 1                     | 1              | 1.95               | 1                                             | 1: single-copy homozygote                 |
| 15310099        | 1.04               | 1                     | 5              | 2.30               | 1                                             | 5: single-copy homozygote                 |
| 15311117        | 1.25               | 1                     | 2              | 2.30               | 1                                             | 2: single-copy homozygote                 |
| 15330585        | 1.26               | 1                     | 11             | 2.03               | 1                                             | 11: single-copy homozygote                |
| 16080004        | 1.28               | 1                     | 14             | 1.96               | 1                                             | 14: single-copy homozygote                |
| 16080192        | 1.24               | 1                     | 13             | 2.00               | 1                                             | 13: single-copy homozygote                |

| Transgenic Line | T <sub>0</sub>     |                       | T <sub>1</sub> |                    |                                               | T <sub>2</sub>                            |
|-----------------|--------------------|-----------------------|----------------|--------------------|-----------------------------------------------|-------------------------------------------|
|                 | Ratio (target/ref) | Estimated Copy Number | Homozygote No. | Ratio (target/ref) | Estimated Copy Number of T <sub>0</sub> Plant | Verification of T <sub>1</sub> Homozygote |
| 16160147        | 0.88               | 1                     | 8              | 1.96               | 1                                             | 8: single-copy homozygote                 |
| 16120723        | 1.32               | 1                     | 7              | 2.30               | 1                                             | 7: single-copy homozygote                 |
| 15370355        | 1.16               | 1                     | 12             | 2.18               | 1                                             | 12: single-copy homozygote                |
| 15451703        | 1.16               | 1                     | 14             | 2.36               | 1                                             | 14: single-copy homozygote                |
| 15380668        | 0.92               | 1                     | 8              | 2.00               | 1                                             | 8: single-copy homozygote                 |
| 15400040        | 1.28               | 1                     | 17             | 2.16               | 1                                             | 17: single-copy homozygote                |
| 15400829        | 1.20               | 1                     | 3              | 2.13               | 1                                             | 3: single-copy homozygote                 |
| 15420348        | 1.40               | 1                     | 1              | 2.03               | 1                                             | 1: single-copy homozygote                 |
| 15420349        | 1.33               | 1                     | 12             | 2.01               | 1                                             | 12: single-copy homozygote                |
| 15431649        | 1.05               | 1                     | 8              | 2.03               | 1                                             | 8: single-copy homozygote                 |
| 15400479        | 1.24               | 1                     | 8              | 1.99               | 1                                             | 8: single-copy homozygote                 |
| 15420381        | 1.31               | 1                     | 7              | 1.84               | 1                                             | 7: single-copy homozygote                 |
| 15410301        | 1.06               | 1                     | 4              | 1.97               | 1                                             | 4: single-copy homozygote                 |
| 15380659        | 1.24               | 1                     | 2              | 1.83               | 1                                             | 2: single-copy homozygote                 |
| 15410249        | 1.14               | 1                     | 13             | 2.31               | 1                                             | 13: single-copy homozygote                |
| 15440164        | 1.34               | 1                     | 1              | 1.92               | 1                                             | 1: single-copy homozygote                 |
| 15380417        | 1.35               | 1                     | 4              | 2.20               | 1                                             | 4: single-copy homozygote                 |
| 15390636        | 1.34               | 1                     | 10             | 2.15               | 1                                             | 10: single-copy homozygote                |
| 15390688        | 1.17               | 1                     | 20             | 2.13               | 1                                             | 20: single-copy homozygote                |
| 15400357        | 1.17               | 1                     | 12             | 2.14               | 1                                             | 12: single-copy homozygote                |

| Transgenic Line | T <sub>0</sub>     |                       | T <sub>1</sub> |                    |                                               | T <sub>2</sub>                            |
|-----------------|--------------------|-----------------------|----------------|--------------------|-----------------------------------------------|-------------------------------------------|
|                 | Ratio (target/ref) | Estimated Copy Number | Homozygote No. | Ratio (target/ref) | Estimated Copy Number of T <sub>0</sub> Plant | Verification of T <sub>1</sub> Homozygote |
| 16150224        | 1.33               | 1                     | 10             | 2.23               | 1                                             | 10: single-copy homozygote                |
| 16150225        | 1.15               | 1                     | 4              | 2.04               | 1                                             | 4: single-copy homozygote                 |
| 16170257        | 1.13               | 1                     | 1              | 2.09               | 1                                             | 1: single-copy homozygote                 |
| 16120118        | 1.21               | 1                     | 3              | 2.04               | 1                                             | 3: single-copy homozygote                 |
| 16090501        | 1.34               | 1                     | 15             | 2.00               | 1                                             | 15: single-copy homozygote                |
| 16130673        | 1.06               | 1                     | 7              | 2.12               | 1                                             | 7: single-copy homozygote                 |
| 16130651        | 1.08               | 1                     | 4              | 2.00               | 1                                             | 4: single-copy homozygote                 |
| 16140338        | 0.96               | 1                     | 11             | 1.96               | 1                                             | 11: single-copy homozygote                |
| 16141425        | 1.02               | 1                     | 8              | 2.03               | 1                                             | 8: single-copy homozygote                 |
| 16090459        | 1.25               | 1                     | 7              | 1.84               | 1                                             | 7: single-copy homozygote                 |
| 16120696        | 1.35               | 1                     | 3              | 2.00               | 1                                             | 3: single-copy homozygote                 |
| 16120726        | 1.37               | 1                     | 1              | 2.03               | 1                                             | 1: single-copy homozygote                 |
| 16141095        | 1.17               | 1                     | 5              | 2.00               | 1                                             | 5: single-copy homozygote                 |
| 16110439        | 1.17               | 1                     | 4              | 1.92               | 1                                             | 4: single-copy homozygote                 |
| 16121298        | 1.39               | 1                     | 7              | 2.17               | 1                                             | 7: single-copy homozygote                 |
| 16170465        | 1.15               | 1                     | 11             | 2.01               | 1                                             | 11: single-copy homozygote                |
| 16170424        | 0.99               | 1                     | 9              | 2.04               | 1                                             | 9: single-copy homozygote                 |
| 16200143        | 1.00               | 1                     | 12             | 1.95               | 1                                             | 12: single-copy homozygote                |
| 16200176        | 1.05               | 1                     | 4              | 2.28               | 1                                             | 4: single-copy homozygote                 |
| 16200211        | 1.08               | 1                     | 13             | 2.09               | 1                                             | 13: single-copy homozygote                |



| Transgenic Line | T <sub>0</sub>     |                       | T <sub>1</sub> |                    |                                               | T <sub>2</sub>                            |
|-----------------|--------------------|-----------------------|----------------|--------------------|-----------------------------------------------|-------------------------------------------|
|                 | Ratio (target/ref) | Estimated Copy Number | Homozygote No. | Ratio (target/ref) | Estimated Copy Number of T <sub>0</sub> Plant | Verification of T <sub>1</sub> Homozygote |
| 16120676        | 1.37               | 1                     | 10             | 2.03               | 1                                             | 10: single-copy homozygote                |
| 16100352        | 1.22               | 1                     | 6              | 1.94               | 1                                             | 6: single-copy homozygote                 |
| 16100393        | 1.40               | 1                     | 3              | 2.05               | 1                                             | 3: single-copy homozygote                 |
| 14401016        | 1.02               | 1                     | 15             | 1.93               | 1                                             | 15: single-copy homozygote                |
| 16190031        | 1.06               | 1                     | 1              | 2.12               | 1                                             | 1: single-copy homozygote                 |
| 16200200        | 1.06               | 1                     | 10             | 1.97               | 1                                             | 10: single-copy homozygote                |
| 16121454        | 1.18               | 1                     | 11             | 2.15               | 1                                             | 11: single-copy homozygote                |
| 16121540        | 1.15               | 1                     | 5              | 2.45               | 1                                             | 5: single-copy homozygote                 |
| 16160651        | 1.18               | 1                     | 8              | 2.07               | 1                                             | 8: single-copy homozygote                 |
| 16190262        | 1.38               | 1                     | 8              | 2.49               | 1                                             | 8: single-copy homozygote                 |
| 16210050        | 1.2                | 1                     | 9              | 2.02               | 1                                             | 9: single-copy homozygote                 |
| 16140262        | 1.26               | 1                     | 10             | 2.06               | 1                                             | 10: single-copy homozygote                |
| 16141114        | 1.26               | 1                     | 1              | 1.99               | 1                                             | 1: single-copy homozygote                 |
| 16180163        | 1.10               | 1                     | 6              | 2.07               | 1                                             | 6: single-copy homozygote                 |
| 16130217        | 1.04               | 1                     | 6              | 1.95               | 1                                             | 6: single-copy homozygote                 |
| 16180275        | 1.16               | 1                     | 5              | 2.47               | 1                                             | 5: single-copy homozygote                 |
| 16160267        | 1.05               | 1                     | 11             | 2.03               | 1                                             | 11: single-copy homozygote                |
| 16160269        | 1.10               | 1                     | 4              | 1.94               | 1                                             | 4: single-copy homozygote                 |
| 16160739        | 1.07               | 1                     | 5              | 2.09               | 1                                             | 5: single-copy homozygote                 |
| 16170360        | 0.97               | 1                     | 6              | 2.28               | 1                                             | 6: single-copy homozygote                 |

| Transgenic Line | T <sub>0</sub>     |                       | T <sub>1</sub> |                    |                                               | T <sub>2</sub>                            |
|-----------------|--------------------|-----------------------|----------------|--------------------|-----------------------------------------------|-------------------------------------------|
|                 | Ratio (target/ref) | Estimated Copy Number | Homozygote No. | Ratio (target/ref) | Estimated Copy Number of T <sub>0</sub> Plant | Verification of T <sub>1</sub> Homozygote |
| 15160925        | 1.22               | 1                     | 10             | 2.04               | 1                                             | 10: single-copy homozygote                |
| 15240012        | 1.31               | 1                     | 3              | 1.98               | 1                                             | 3: single-copy homozygote                 |
| 16130662        | 1.11               | 1                     | 7              | 3.92               | 2                                             | 7: two-copy homozygote                    |
| 16160053        | 0.89               | 1                     | 7              | 2.05               | 1                                             | 7: single-copy homozygote                 |
| 16160119        | 1.14               | 1                     | 4              | 2.02               | 1                                             | 4: single-copy homozygote                 |
| 16121419        | 1.36               | 1                     | 13             | 2.09               | 1                                             | 13: single-copy homozygote                |
| 16190235        | 0.95               | 1                     | 4              | 1.99               | 1                                             | 4: single-copy homozygote                 |
| 16190260        | 1.31               | 1                     | 10             | 1.98               | 1                                             | 10: single-copy homozygote                |
| 16200526        | 0.62               | 1                     | 12             | 2.03               | 1                                             | 12: single-copy homozygote                |
| 16200535        | 1.37               | 1                     | 3              | 2.00               | 1                                             | 3: single-copy homozygote                 |
| 16200537        | 1.09               | 1                     | 6              | 2.09               | 1                                             | 6: single-copy homozygote                 |
| 16100764        | 1.12               | 1                     | 7              | 2.00               | 1                                             | 7: single-copy homozygote                 |
| 16200491        | 1.31               | 1                     | 6              | 2.08               | 1                                             | 6: single-copy homozygote                 |
| 16200504        | 1.03               | 1                     | 8              | 1.93               | 1                                             | 8: single-copy homozygote                 |
| 16200566        | 1.07               | 1                     | 3              | 1.99               | 1                                             | 3: single-copy homozygote                 |
| 16200582        | 1.30               | 1                     | 4              | 2.11               | 1                                             | 4: single-copy homozygote                 |
| 16180197        | 1.24               | 1                     | 3              | 2.01               | 1                                             | 3: single-copy homozygote                 |
| 16200503        | 0.96               | 1                     | 6              | 1.95               | 1                                             | 6: single-copy homozygote                 |
| 16210163        | 1.28               | 1                     | 3              | 2.02               | 1                                             | 3: single-copy homozygote                 |
| 16140917        | 1.04               | 1                     | 6              | 1.99               | 1                                             | 6: single-copy homozygote                 |

| Transgenic Line | T <sub>0</sub>     |                       | T <sub>1</sub> |                    |                                               | T <sub>2</sub>                            |
|-----------------|--------------------|-----------------------|----------------|--------------------|-----------------------------------------------|-------------------------------------------|
|                 | Ratio (target/ref) | Estimated Copy Number | Homozygote No. | Ratio (target/ref) | Estimated Copy Number of T <sub>0</sub> Plant | Verification of T <sub>1</sub> Homozygote |
| 16140928        | 1.18               | 1                     | 8              | 2.13               | 1                                             | 8: single-copy homozygote                 |
| 16200261        | 1.02               | 1                     | 12             | 1.95               | 1                                             | 12: single-copy homozygote                |
| 16150106        | 1.27               | 1                     | 4              | 2.00               | 1                                             | 4: single-copy homozygote                 |
| 16160417        | 0.81               | 1                     | 3              | 2.23               | 1                                             | 3: single-copy homozygote                 |
| 16220227        | 0.64               | 1                     | 5              | 1.98               | 1                                             | 5: single-copy homozygote                 |
| 14170029        | 0.95               | 1                     | 7              | 2.22               | 1                                             | 7: single-copy homozygote                 |
| 16200645        | 1.15               | 1                     | 1              | 2.25               | 1                                             | 1: single-copy homozygote                 |
| 16210523        | 1.08               | 1                     | 6              | 2.03               | 1                                             | 6: single-copy homozygote                 |
| 16220283        | 1.28               | 1                     | 8              | 2.16               | 1                                             | 8: single-copy homozygote                 |
| 16180316        | 1.13               | 1                     | 7              | 1.96               | 1                                             | 7: single-copy homozygote                 |
| 16200819        | 1.10               | 1                     | 7              | 2.17               | 1                                             | 7: single-copy homozygote                 |
| 16210026        | 1.18               | 1                     | 5              | 1.80               | 1                                             | 5: single-copy homozygote                 |
| 16210135        | 1.28               | 1                     | 1              | 2.04               | 1                                             | 1: single-copy homozygote                 |
| 16210136        | 1.36               | 1                     | 8              | 1.93               | 1                                             | 8: single-copy homozygote                 |
| 16210264        | 1.03               | 1                     | 5              | 1.94               | 1                                             | 5: single-copy homozygote                 |
| 16210083        | 1.37               | 1                     | 15             | 1.95               | 1                                             | 15: single-copy homozygote                |
| 16180233        | 1.07               | 1                     | 6              | 2.01               | 1                                             | 6: single-copy homozygote                 |
| 16200473        | 0.86               | 1                     | 7              | 2.02               | 1                                             | 7: single-copy homozygote                 |
| 16200478        | 1.17               | 1                     | 13             | 2.03               | 1                                             | 13: single-copy homozygote                |
| 16210085        | 1.40               | 1                     | 11             | 2.17               | 1                                             | 11: single-copy homozygote                |

| Transgenic Line | T <sub>0</sub>     |                       | T <sub>1</sub> |                    |                                               | T <sub>2</sub>                            |
|-----------------|--------------------|-----------------------|----------------|--------------------|-----------------------------------------------|-------------------------------------------|
|                 | Ratio (target/ref) | Estimated Copy Number | Homozygote No. | Ratio (target/ref) | Estimated Copy Number of T <sub>0</sub> Plant | Verification of T <sub>1</sub> Homozygote |
| 16210261        | 1.39               | 1                     | 1              | 1.97               | 1                                             | 1: single-copy homozygote                 |
| 16240124        | 1.15               | 1                     | 1              | 1.83               | 1                                             | 1: single-copy homozygote                 |
| 14260059        | 1.14               | 1                     | 7              | 2.09               | 1                                             | 7: single-copy homozygote                 |
| 14290236        | 0.70               | 1                     | 6              | 2.33               | 1                                             | 6: single-copy homozygote                 |
| 15441154        | 1.30               | 1                     | 2              | 2.20               | 1                                             | 2: single-copy homozygote                 |
| 15441149        | 1.31               | 1                     | 5              | 1.99               | 1                                             | 5: single-copy homozygote                 |
| 15450728        | 1.25               | 1                     | 7              | 5.71               | ≥3                                            | 7: multi-copy                             |
| 15461291        | 1.31               | 1                     | 4              | 2.02               | 1                                             | 4: single-copy homozygote                 |
| 14330445        | 1.19               | 1                     | 11             | 2.04               | 1                                             | 11: single-copy homozygote                |
| 16160714        | 1.10               | 1                     | 3              | 2.10               | 1                                             | 3: single-copy homozygote                 |
| 16230233        | 1.19               | 1                     | 8              | 2.30               | 1                                             | 8: single-copy homozygote                 |
| 16270533        | 0.78               | 1                     | 14             | 2.15               | 1                                             | 14: single-copy homozygote                |
| 15450628        | 1.08               | 1                     | 3              | 2.01               | 1                                             | 3: single-copy homozygote                 |
| 15461455        | 1.20               | 1                     | 11             | 2.08               | 1                                             | 11: single-copy homozygote                |
| 15461460        | 1.28               | 1                     | 17             | 2.17               | 1                                             | 17: single-copy homozygote                |
| 15470278        | 1.02               | 1                     | 12             | 2.05               | 1                                             | 12: single-copy homozygote                |
| 15480634        | 1.04               | 1                     | 1              | 2.08               | 1                                             | 1: single-copy homozygote                 |
| 15480114        | 1.26               | 1                     | 2              | 2.03               | 1                                             | 2: single-copy homozygote                 |
| 15480115        | 0.97               | 1                     | 1              | 1.94               | 1                                             | 1: single-copy homozygote                 |
| 15480305        | 1.21               | 1                     | 8              | 1.98               | 1                                             | 8: single-copy homozygote                 |

| Transgenic Line | T <sub>0</sub>     |                       | T <sub>1</sub> |                    |                                               | T <sub>2</sub>                            |
|-----------------|--------------------|-----------------------|----------------|--------------------|-----------------------------------------------|-------------------------------------------|
|                 | Ratio (target/ref) | Estimated Copy Number | Homozygote No. | Ratio (target/ref) | Estimated Copy Number of T <sub>0</sub> Plant | Verification of T <sub>1</sub> Homozygote |
| 15490082        | 1.28               | 1                     | 2              | 1.87               | 1                                             | 2: single-copy homozygote                 |
| 16050466        | 1.18               | 1                     | 2              | 2.21               | 1                                             | 2: single-copy homozygote                 |
| 15140507        | 0.99               | 1                     | 7              | 2.11               | 1                                             | 7: single-copy homozygote                 |
| 15120335        | 1.08               | 1                     | 9              | 2.20               | 1                                             | 9: single-copy homozygote                 |
| 16131458        | 1.24               | 1                     | 7              | 1.97               | 1                                             | 7: single-copy homozygote                 |
| 16210003        | 1.40               | 1                     | 6              | 2.02               | 1                                             | 6: single-copy homozygote                 |
| 15510844        | 1.40               | 1                     | 11             | 1.99               | 1                                             | 11: single-copy homozygote                |
| 15440877        | 1.18               | 1                     | 7              | 2.10               | 1                                             | 7: single-copy homozygote                 |
| 15470692        | 1.24               | 1                     | 12             | 2.07               | 1                                             | 12: single-copy homozygote                |
| 15492027        | 1.00               | 1                     | 13             | 2.00               | 1                                             | 13: single-copy homozygote                |
| 15490309        | 1.36               | 1                     | 10             | 1.94               | 1                                             | 10: single-copy homozygote                |
| 15451468        | 1.23               | 1                     | 25             | 2.01               | 1                                             | 25: single-copy homozygote                |
| 15451483        | 1.36               | 1                     | 8              | 1.88               | 1                                             | 8: single-copy homozygote                 |
| 15481948        | 1.33               | 1                     | 8              | 1.98               | 1                                             | 8: single-copy homozygote                 |
| 15060269        | 1.07               | 1                     | 12             | 2.28               | 1                                             | 12: single-copy homozygote                |
| 15100522        | 1.40               | 1                     | 1              | 2.03               | 1                                             | 1: single-copy homozygote                 |
| 14410350        | 1.16               | 1                     | 15             | 1.97               | 1                                             | 15: single-copy homozygote                |
| 16140727        | 1.10               | 1                     | 5              | 2.29               | 1                                             | 5: single-copy homozygote                 |
| 16100773        | 1.07               | 1                     | 11             | 1.95               | 1                                             | 11: single-copy homozygote                |
| 16110524        | 1.19               | 1                     | 10             | 1.93               | 1                                             | 10: single-copy homozygote                |

| Transgenic Line | T <sub>0</sub>     |                       | T <sub>1</sub> |                    |                                               | T <sub>2</sub>                            |
|-----------------|--------------------|-----------------------|----------------|--------------------|-----------------------------------------------|-------------------------------------------|
|                 | Ratio (target/ref) | Estimated Copy Number | Homozygote No. | Ratio (target/ref) | Estimated Copy Number of T <sub>0</sub> Plant | Verification of T <sub>1</sub> Homozygote |
| 16121569        | 1.33               | 1                     | 2              | 2.01               | 1                                             | 2: single-copy homozygote                 |
| 16111137        | 1.24               | 1                     | 6              | 2.20               | 1                                             | 6: single-copy homozygote                 |
| 14320492        | 0.88               | 1                     | 10             | 1.96               | 1                                             | 10: single-copy homozygote                |
| 16150035        | 1.34               | 1                     | 14             | 2.00               | 1                                             | 14: single-copy homozygote                |
| 16100493        | 1.17               | 1                     | 4              | 2.01               | 1                                             | 4: single-copy homozygote                 |
| 16111073        | 0.79               | 1                     | 1              | 2.36               | 1                                             | 1: single-copy homozygote                 |
| 16111467        | 0.75               | 1                     | 5              | 2.05               | 1                                             | 5: single-copy homozygote                 |
| 14371182        | 1.37               | 1                     | 7              | 4.01               | 2                                             | 7: two-copy homozygote                    |
| 15451720        | 1.32               | 1                     | 19             | 2.16               | 1                                             | 19: single-copy homozygote                |
| 15451940        | 1.19               | 1                     | 9              | 1.96               | 1                                             | 9: single-copy homozygote                 |
| 15452080        | 1.07               | 1                     | 1              | 2.26               | 1                                             | 1: single-copy homozygote                 |
| 15140545        | 1.32               | 1                     | 3              | 3.88               | 2                                             | 3: two-copy homozygote                    |
| 15160807        | 1.09               | 1                     | 11             | 2.24               | 1                                             | 11: single-copy homozygote                |
| 15431827        | 1.35               | 1                     | 6              | 1.87               | 1                                             | 6: single-copy homozygote                 |
| 16180354        | 1.38               | 1                     | 3              | 2.15               | 1                                             | 3: single-copy homozygote                 |
| 14340273        | 1.05               | 1                     | 6              | 2.08               | 1                                             | 6: single-copy homozygote                 |
| 17090296        | 0.88               | 1                     | 12             | 2.14               | 1                                             | 12: single-copy homozygote                |
| 16131344        | 1.02               | 1                     | 5              | 2.00               | 1                                             | 5: single-copy homozygote                 |
| 14340463        | 1.18               | 1                     | 19             | 2.04               | 1                                             | 19: single-copy homozygote                |
| 16230088        | 1.33               | 1                     | 13             | 4.00               | 2                                             | 13: two-copy homozygote                   |

| Transgenic Line | T <sub>0</sub>     |                       | T <sub>1</sub> |                    |                                               | T <sub>2</sub>                            |
|-----------------|--------------------|-----------------------|----------------|--------------------|-----------------------------------------------|-------------------------------------------|
|                 | Ratio (target/ref) | Estimated Copy Number | Homozygote No. | Ratio (target/ref) | Estimated Copy Number of T <sub>0</sub> Plant | Verification of T <sub>1</sub> Homozygote |
| 16230130        | 1.21               | 1                     | 2              | 2.05               | 1                                             | 2: single-copy homozygote                 |
| 17100238        | 1.19               | 1                     | 1              | 2.43               | 1                                             | 1: single-copy homozygote                 |
| 17100265        | 1                  | 1                     | 1              | 2.15               | 1                                             | 1: single-copy homozygote                 |
| 17100270        | 1.29               | 1                     | 5              | 2.04               | 1                                             | 5: single-copy homozygote                 |
| 17100384        | 1.28               | 1                     | 2              | 2.35               | 1                                             | 2: single-copy homozygote                 |
| 16210631        | 1.11               | 1                     | 1              | 2.16               | 1                                             | 1: single-copy homozygote                 |
| 16210636        | 1.39               | 1                     | 5              | 2.25               | 1                                             | 5: single-copy homozygote                 |
| 16230580        | 1.29               | 1                     | 10             | 2.05               | 1                                             | 10: single-copy homozygote                |
| 16230595        | 1.09               | 1                     | 8              | 2.23               | 1                                             | 8: single-copy homozygote                 |
| 16190856        | 1.27               | 1                     | 8              | 2.03               | 1                                             | 8: single-copy homozygote                 |
| 16270491        | 1.15               | 1                     | 11             | 1.93               | 1                                             | 11: single-copy homozygote                |
| 16210131        | 1.26               | 1                     | 2              | 1.87               | 1                                             | 2: single-copy homozygote                 |
| 16210189        | 1.22               | 1                     | 4              | 2.28               | 1                                             | 4: single-copy homozygote                 |
| 16240112        | 1.32               | 1                     | 18             | 2.00               | 1                                             | 18: single-copy homozygote                |
| 16240172        | 1.35               | 1                     | 7              | 1.89               | 1                                             | 7: single-copy homozygote                 |
| 16210373        | 1.17               | 1                     | 1              | 2.03               | 1                                             | 1: single-copy homozygote                 |
| 16220190        | 1.35               | 1                     | 4              | 2.10               | 1                                             | 4: single-copy homozygote                 |
| 16220200        | 1.29               | 1                     | 2              | 1.94               | 1                                             | 2: single-copy homozygote                 |
| 16270141        | 0.7                | 1                     | 2              | 1.87               | 1                                             | 2: single-copy homozygote                 |
| 17010436        | 1.18               | 1                     | 1              | 2.35               | 1                                             | 1: single-copy homozygote                 |

| Transgenic Line | T <sub>0</sub>     |                       | T <sub>1</sub> |                    |                                               | T <sub>2</sub>                            |
|-----------------|--------------------|-----------------------|----------------|--------------------|-----------------------------------------------|-------------------------------------------|
|                 | Ratio (target/ref) | Estimated Copy Number | Homozygote No. | Ratio (target/ref) | Estimated Copy Number of T <sub>0</sub> Plant | Verification of T <sub>1</sub> Homozygote |
| 17010437        | 1.16               | 1                     | 2              | 2.00               | 1                                             | 2: single-copy homozygote                 |
| 17010446        | 1.29               | 1                     | 14             | 1.96               | 1                                             | 14: single-copy homozygote                |
| 14401028        | 1.06               | 1                     | 6              | 2.06               | 1                                             | 6: single-copy homozygote                 |
| 14420761        | 1.03               | 1                     | 1              | 2.23               | 1                                             | 1: single-copy homozygote                 |
| 15461207        | 0.92               | 1                     | 1              | 2.01               | 1                                             | 1: single-copy homozygote                 |
| 15390514        | 1.40               | 1                     | 6              | 1.94               | 1                                             | 6: single-copy homozygote                 |
| 15400729        | 1.25               | 1                     | 16             | 2.00               | 1                                             | 16: single-copy homozygote                |
| 16160870        | 1.27               | 1                     | 6              | 1.87               | 1                                             | 6: single-copy homozygote                 |
| 15450477        | 1.17               | 1                     | 9              | 2.16               | 1                                             | 9: single-copy homozygote                 |
| 15450499        | 0.87               | 1                     | 7              | 2.23               | 1                                             | 7: single-copy homozygote                 |
| 15450516        | 1.39               | 1                     | 9              | 2.07               | 1                                             | 9: single-copy homozygote                 |
| 15450517        | 1.15               | 1                     | 8              | 1.87               | 1                                             | 8: single-copy homozygote                 |
| 15510883        | 1.39               | 1                     | 14             | 2.31               | 1                                             | 14: single-copy homozygote                |
| 16131042        | 1.30               | 1                     | 6              | 2.02               | 1                                             | 6: single-copy homozygote                 |
| 16260065        | 0.97               | 1                     | 8              | 1.84               | 1                                             | 8: single-copy homozygote                 |
| 16131395        | 1.24               | 1                     | 10             | 1.98               | 1                                             | 10: single-copy homozygote                |
| 16160727        | 1.24               | 1                     | 4              | 2.19               | 1                                             | 4: single-copy homozygote                 |
| 16131303        | 1.24               | 1                     | 10             | 1.97               | 1                                             | 10: single-copy homozygote                |
| 16190768        | 1.32               | 1                     | 6              | 1.93               | 1                                             | 6: single-copy homozygote                 |
| 17140215        | 1.13               | 1                     | 15             | 1.98               | 1                                             | 15: single-copy homozygote                |



| Transgenic Line | T <sub>0</sub>     |                       | T <sub>1</sub> |                    |                                               | T <sub>2</sub>                            |
|-----------------|--------------------|-----------------------|----------------|--------------------|-----------------------------------------------|-------------------------------------------|
|                 | Ratio (target/ref) | Estimated Copy Number | Homozygote No. | Ratio (target/ref) | Estimated Copy Number of T <sub>0</sub> Plant | Verification of T <sub>1</sub> Homozygote |
| 17110078        | 1.07               | 1                     | 5              | 1.95               | 1                                             | 5: single-copy homozygote                 |
| 17120280        | 1.07               | 1                     | 7              | 2.09               | 1                                             | 7: single-copy homozygote                 |
| 16160845        | 1.09               | 1                     | 14             | 2.02               | 1                                             | 14: single-copy homozygote                |
| 17070411        | 1.21               | 1                     | 2              | 2.11               | 1                                             | 2: single-copy homozygote                 |
| 17080075        | 1.13               | 1                     | 10             | 2.04               | 1                                             | 10: single-copy homozygote                |
| 16230641        | 1.3                | 1                     | 2              | 1.89               | 1                                             | 2: single-copy homozygote                 |
| 16230642        | 1.07               | 1                     | 15             | 2.03               | 1                                             | 15: single-copy homozygote                |
| 17150584        | 0.79               | 1                     | 13             | 1.86               | 1                                             | 13: single-copy homozygote                |
| 16200797        | 1.15               | 1                     | 2              | 1.85               | 1                                             | 2: single-copy homozygote                 |
| 16210369        | 1.14               | 1                     | 1              | 2.30               | 1                                             | 1: single-copy homozygote                 |
| 16170231        | 1.08               | 1                     | 15             | 2.34               | 1                                             | 15: single-copy homozygote                |
| 14430021        | 1.21               | 1                     | 9              | 1.95               | 1                                             | 9: single-copy homozygote                 |
| 15190004        | 1.08               | 1                     | 4              | 2.10               | 1                                             | 4: single-copy homozygote                 |
| 15510450        | 1.12               | 1                     | 11             | 2.06               | 1                                             | 11: single-copy homozygote                |
| 16050118        | 0.98               | 1                     | 14             | 2.42               | 1                                             | 14: single-copy homozygote                |
| 17030232        | 1.05               | 1                     | 7              | 2.03               | 1                                             | 7: single-copy homozygote                 |
| 15470900        | 1.08               | 1                     | 8              | 1.99               | 1                                             | 8: single-copy homozygote                 |
| 15492546        | 1.28               | 1                     | 8              | 1.85               | 1                                             | 8: single-copy homozygote                 |
| 16020259        | 1.02               | 1                     | 19             | 2.08               | 1                                             | 19: single-copy homozygote                |
| 16030120        | 1.22               | 1                     | 10             | 2.02               | 1                                             | 10: single-copy homozygote                |

| Transgenic Line | T <sub>0</sub>     |                       | T <sub>1</sub> |                    |                                               | T <sub>2</sub>                            |
|-----------------|--------------------|-----------------------|----------------|--------------------|-----------------------------------------------|-------------------------------------------|
|                 | Ratio (target/ref) | Estimated Copy Number | Homozygote No. | Ratio (target/ref) | Estimated Copy Number of T <sub>0</sub> Plant | Verification of T <sub>1</sub> Homozygote |
| 17150481        | 0.96               | 1                     | 17             | 2.10               | 1                                             | 17: single-copy homozygote                |
| 16110404        | 1.40               | 1                     | 13             | 2.22               | 1                                             | 13: single-copy homozygote                |
| 15491810        | 1.29               | 1                     | 15             | 1.99               | 1                                             | 15: single-copy homozygote                |
| 17070031        | 0.85               | 1                     | 2              | 2.04               | 1                                             | 2: single-copy homozygote                 |
| 15110173        | 1.30               | 1                     | 7              | 1.91               | 1                                             | 7: single-copy homozygote                 |
| 15480677        | 1.34               | 1                     | 3              | 1.84               | 1                                             | 3: single-copy homozygote                 |
| 15520527        | 0.60               | 1                     | 6              | 2.03               | 1                                             | 6: single-copy homozygote                 |
| 15520550        | 0.92               | 1                     | 7              | 1.92               | 1                                             | 7: single-copy homozygote                 |
| 16030262        | 1.30               | 1                     | 1              | 1.99               | 1                                             | 1: single-copy homozygote                 |
| 15451861        | 1.11               | 1                     | 5              | 1.96               | 1                                             | 5: single-copy homozygote                 |
| 15491927        | 1.02               | 1                     | 5              | 2.23               | 1                                             | 5: single-copy homozygote                 |
| 15460560        | 1.38               | 1                     | 1              | 2.02               | 1                                             | 1: single-copy homozygote                 |
| 17150517        | 1.25               | 1                     | 13             | 2.06               | 1                                             | 13: single-copy homozygote                |
| 16260082        | 1.1                | 1                     | 4              | 1.99               | 1                                             | 4: single-copy homozygote                 |
| 16280295        | 1.36               | 1                     | 8              | 2.00               | 1                                             | 8: single-copy homozygote                 |
| 16250127        | 0.86               | 1                     | 10             | 2.01               | 1                                             | 10: single-copy homozygote                |
| 17150675        | 1.26               | 1                     | 2              | 2.04               | 1                                             | 2: single-copy homozygote                 |
| 17150682        | 1.04               | 1                     | 8              | 1.91               | 1                                             | 8: single-copy homozygote                 |
| 17150684        | 1.06               | 1                     | 8              | 1.82               | 1                                             | 8: single-copy homozygote                 |
| 17150704        | 1.16               | 1                     | 4              | 2.05               | 1                                             | 4: single-copy homozygote                 |

| Transgenic Line | T <sub>0</sub>     |                       | T <sub>1</sub> |                    |                                               | T <sub>2</sub>                            |
|-----------------|--------------------|-----------------------|----------------|--------------------|-----------------------------------------------|-------------------------------------------|
|                 | Ratio (target/ref) | Estimated Copy Number | Homozygote No. | Ratio (target/ref) | Estimated Copy Number of T <sub>0</sub> Plant | Verification of T <sub>1</sub> Homozygote |
| 15450621        | 1.09               | 1                     | 2              | 1.85               | 1                                             | 2: single-copy homozygote                 |
| 15190093        | 1.24               | 1                     | 8              | 1.85               | 1                                             | 8: single-copy homozygote                 |
| 15150545        | 1.05               | 1                     | 17             | 1.88               | 1                                             | 17: single-copy homozygote                |
| 15450818        | 1.06               | 1                     | 11             | 2.09               | 1                                             | 11: single-copy homozygote                |
| 15520186        | 0.78               | 1                     | 2              | 3.92               | 2                                             | 2: two-copy homozygote                    |
| 16030630        | 1.28               | 1                     | 19             | 2.01               | 1                                             | 19: single-copy homozygote                |
| 16060256        | 1.14               | 1                     | 9              | 1.88               | 1                                             | 9: single-copy homozygote                 |
| 16100465        | 1.20               | 1                     | 10             | 1.88               | 1                                             | 10: single-copy homozygote                |
| 16490130        | 1.13               | 1                     | 7              | 2.03               | 1                                             | 7: single-copy homozygote                 |
| 16490131        | 1.04               | 1                     | 12             | 1.95               | 1                                             | 12: single-copy homozygote                |
| 16190723        | 1.13               | 1                     | 23             | 1.97               | 1                                             | 23: single-copy homozygote                |
| 16230278        | 1.18               | 1                     | 11             | 2.00               | 1                                             | 11: single-copy homozygote                |
| 15462100        | 1.18               | 1                     | 5              | 2.03               | 1                                             | 5: single-copy homozygote                 |
| 15462128        | 1.10               | 1                     | 16             | 2.02               | 1                                             | 16: single-copy homozygote                |
| 15492249        | 1.40               | 1                     | 9              | 2.04               | 1                                             | 9: single-copy homozygote                 |
| 15310934        | 1.18               | 1                     | 3              | 2.00               | 1                                             | 3: single-copy homozygote                 |
| 15310961        | 1.03               | 1                     | 1              | 1.91               | 1                                             | 1: single-copy homozygote                 |
| 17160165        | 0.97               | 1                     | 4              | 2.09               | 1                                             | 4: single-copy homozygote                 |
| 16131540        | 0.88               | 1                     | 6              | 1.96               | 1                                             | 6: single-copy homozygote                 |
| 16131197        | 1.32               | 1                     | 9              | 1.98               | 1                                             | 9: single-copy homozygote                 |

| Transgenic Line | T <sub>0</sub>     |                       | T <sub>1</sub> |                    |                                               | T <sub>2</sub>                            |
|-----------------|--------------------|-----------------------|----------------|--------------------|-----------------------------------------------|-------------------------------------------|
|                 | Ratio (target/ref) | Estimated Copy Number | Homozygote No. | Ratio (target/ref) | Estimated Copy Number of T <sub>0</sub> Plant | Verification of T <sub>1</sub> Homozygote |
| 15290277        | 1.22               | 1                     | 17             | 1.74               | 1                                             | 17: single-copy homozygote                |
| 15260517        | 0.83               | 1                     | 13             | 2.02               | 1                                             | 13: single-copy homozygote                |
| 15260218        | 0.85               | 1                     | 12             | 1.95               | 1                                             | 12: single-copy homozygote                |
| 15260262        | 1.36               | 1                     | 1              | 1.95               | 1                                             | 1: single-copy homozygote                 |
| 16130973        | 1.24               | 1                     | 12             | 2.01               | 1                                             | 12: single-copy homozygote                |
| 17100203        | 1.32               | 1                     | 1              | 2.10               | 1                                             | 1: single-copy homozygote                 |
| 17100208        | 1.25               | 1                     | 1              | 2.17               | 1                                             | 1: single-copy homozygote                 |
| 17110122        | 1.22               | 1                     | 4              | 2.15               | 1                                             | 4: single-copy homozygote                 |
| 17110123        | 1.04               | 1                     | 2              | 2.06               | 1                                             | 2: single-copy homozygote                 |
| 16040450        | 1.14               | 1                     | 5              | 2.00               | 1                                             | 5: single-copy homozygote                 |
| 16060147        | 1.11               | 1                     | 13             | 2.02               | 1                                             | 13: single-copy homozygote                |
| 16060158        | 1.25               | 1                     | 4              | 2.00               | 1                                             | 4: single-copy homozygote                 |
| 16060159        | 1.13               | 1                     | 14             | 1.96               | 1                                             | 14: single-copy homozygote                |
| 15431641        | 1.18               | 1                     | 7              | 2.01               | 1                                             | 7: single-copy homozygote                 |
| 15451511        | 1.02               | 1                     | 17             | 2.04               | 1                                             | 17: single-copy homozygote                |
| 15410087        | 1.26               | 1                     | 14             | 1.84               | 1                                             | 14: single-copy homozygote                |
| 15410103        | 1.22               | 1                     | 1              | 2.03               | 1                                             | 1: single-copy homozygote                 |
| 15390021        | 1.20               | 1                     | 11             | 2.03               | 1                                             | 11: single-copy homozygote                |
| 15390239        | 1.32               | 1                     | 5              | 1.89               | 1                                             | 5: single-copy homozygote                 |
| 15330847        | 1.14               | 1                     | 22             | 1.97               | 1                                             | 22: single-copy homozygote                |

| Transgenic Line | T <sub>0</sub>     |                       | T <sub>1</sub> |                    |                                               | T <sub>2</sub>                            |
|-----------------|--------------------|-----------------------|----------------|--------------------|-----------------------------------------------|-------------------------------------------|
|                 | Ratio (target/ref) | Estimated Copy Number | Homozygote No. | Ratio (target/ref) | Estimated Copy Number of T <sub>0</sub> Plant | Verification of T <sub>1</sub> Homozygote |
| 16200681        | 0.75               | 1                     | 5              | 2.41               | 1                                             | 5: single-copy homozygote                 |
| 16200711        | 1.22               | 1                     | 10             | 2.18               | 1                                             | 10: single-copy homozygote                |
| 15311320        | 1.13               | 1                     | 2              | 2.13               | 1                                             | 2: single-copy homozygote                 |
| 15440973        | 0.87               | 1                     | 7              | 1.84               | 1                                             | 7: single-copy homozygote                 |
| 16131826        | 1.33               | 1                     | 13             | 1.82               | 1                                             | 13: single-copy homozygote                |
| 16120354        | 1.27               | 1                     | 2              | 1.97               | 1                                             | 2: single-copy homozygote                 |
| 16131944        | 1.36               | 1                     | 9              | 1.73               | 1                                             | 9: single-copy homozygote                 |
| 16190321        | 0.75               | 1                     | 20             | 1.93               | 1                                             | 20: single-copy homozygote                |
| 15490333        | 1.11               | 1                     | 3              | 2.04               | 1                                             | 3: single-copy homozygote                 |
| 15490437        | 1.18               | 1                     | 3              | 1.95               | 1                                             | 3: single-copy homozygote                 |
| 16240377        | 1.34               | 1                     | 9              | 2.05               | 1                                             | 9: single-copy homozygote                 |
| 16260145        | 0.77               | 1                     | 5              | 2.11               | 1                                             | 5: single-copy homozygote                 |
| 15461996        | 1.24               | 1                     | 6              | 2.00               | 1                                             | 6: single-copy homozygote                 |
| 15462266        | 1.08               | 1                     | 14             | 1.99               | 1                                             | 14: single-copy homozygote                |
| 17050192        | 1.24               | 1                     | 1              | 2.27               | 1                                             | 1: single-copy homozygote                 |
| 15420930        | 0.83               | 1                     | 5              | 2.24               | 1                                             | 5: single-copy homozygote                 |
| 15360388        | 1.05               | 1                     | 3              | 2.13               | 1                                             | 3: single-copy homozygote                 |
| 15430493        | 1.26               | 1                     | 1              | 2.24               | 1                                             | 1: single-copy homozygote                 |
| 15500944        | 1.07               | 1                     | 10             | 2.00               | 1                                             | 10: single-copy homozygote                |
| 15500945        | 1.01               | 1                     | 6              | 1.98               | 1                                             | 6: single-copy homozygote                 |

| Transgenic Line | T <sub>0</sub>     |                       | T <sub>1</sub> |                    |                                               | T <sub>2</sub>                            |
|-----------------|--------------------|-----------------------|----------------|--------------------|-----------------------------------------------|-------------------------------------------|
|                 | Ratio (target/ref) | Estimated Copy Number | Homozygote No. | Ratio (target/ref) | Estimated Copy Number of T <sub>0</sub> Plant | Verification of T <sub>1</sub> Homozygote |
| 15520016        | 0.89               | 1                     | 4              | 2.06               | 1                                             | 4: single-copy homozygote                 |
| 16210515        | 1.16               | 1                     | 7              | 2.12               | 1                                             | 7: single-copy homozygote                 |
| 16250487        | 0.78               | 1                     | 13             | 2.09               | 1                                             | 13: single-copy homozygote                |
| 16280128        | 1.04               | 1                     | 5              | 1.87               | 1                                             | 5: single-copy homozygote                 |
| 16260564        | 0.65               | 1                     | 2              | 1.98               | 1                                             | 2: single-copy homozygote                 |
| 16020266        | 1.23               | 1                     | 2              | 2.04               | 1                                             | 2: single-copy homozygote                 |
| 15400561        | 0.77               | 1                     | 22             | 2.00               | 1                                             | 22: single-copy homozygote                |
| 17190152        | 1.07               | 1                     | 1              | 1.99               | 1                                             | 1: single-copy homozygote                 |
| 16010074        | 0.90               | 1                     | 2              | 1.92               | 1                                             | 2: single-copy homozygote                 |
| 16130749        | 1.16               | 1                     | 17             | 1.94               | 1                                             | 17: single-copy homozygote                |
| 16130757        | 1.06               | 1                     | 8              | 2.00               | 1                                             | 8: single-copy homozygote                 |
| 16190844        | 1.15               | 1                     | 17             | 2.00               | 1                                             | 17: single-copy homozygote                |
| 17100193        | 1.16               | 1                     | 2              | 1.86               | 1                                             | 2: single-copy homozygote                 |
| 17140268        | 1.06               | 1                     | 8              | 1.96               | 1                                             | 8: single-copy homozygote                 |
| 17140579        | 1.01               | 1                     | 1              | 1.97               | 1                                             | 1: single-copy homozygote                 |
| 17150674        | 1.34               | 1                     | 1              | 4.34               | 2                                             | 1: two-copy homozygote                    |
| 17090180        | 1.05               | 1                     | 4              | 1.98               | 1                                             | 4: single-copy homozygote                 |
| 16131781        | 1.18               | 1                     | 6              | 2.11               | 1                                             | 6: single-copy homozygote                 |
| 16131542        | 1.26               | 1                     | 8              | 2.00               | 1                                             | 8: single-copy homozygote                 |
| 16131812        | 1.37               | 1                     | 8              | 3.91               | 2                                             | 8: two-copy homozygote                    |

| Transgenic Line | T <sub>0</sub>     |                       | T <sub>1</sub> |                    |                                               | T <sub>2</sub>                            |
|-----------------|--------------------|-----------------------|----------------|--------------------|-----------------------------------------------|-------------------------------------------|
|                 | Ratio (target/ref) | Estimated Copy Number | Homozygote No. | Ratio (target/ref) | Estimated Copy Number of T <sub>0</sub> Plant | Verification of T <sub>1</sub> Homozygote |
| 16130584        | 1.21               | 1                     | 8              | 2.02               | 1                                             | 8: single-copy homozygote                 |
| 16230351        | 1.2                | 1                     | 4              | 1.87               | 1                                             | 4: single-copy homozygote                 |
| 16230352        | 0.91               | 1                     | 5              | 1.78               | 1                                             | 5: single-copy homozygote                 |
| 16230375        | 1.35               | 1                     | 5              | 2.00               | 1                                             | 5: single-copy homozygote                 |
| 17170041        | 1.09               | 1                     | 1              | 1.91               | 1                                             | 1: single-copy homozygote                 |
| 16161137        | 1.08               | 1                     | 7              | 2.00               | 1                                             | 7: single-copy homozygote                 |
| 16230140        | 1.21               | 1                     | 2              | 2.02               | 1                                             | 2: single-copy homozygote                 |
| 16160948        | 1.06               | 1                     | 5              | 1.90               | 1                                             | 5: single-copy homozygote                 |
| 16160949        | 1.02               | 1                     | 10             | 2.05               | 1                                             | 10: single-copy homozygote                |
| 16161023        | 1.24               | 1                     | 6              | 2.00               | 1                                             | 6: single-copy homozygote                 |
| 16161038        | 1.06               | 1                     | 6              | 1.84               | 1                                             | 6: single-copy homozygote                 |
| 16230074        | 1.26               | 1                     | 13             | 2.00               | 1                                             | 13: single-copy homozygote                |
| 16230081        | 1.2                | 1                     | 1              | 1.93               | 1                                             | 1: single-copy homozygote                 |
| 16210287        | 1.26               | 1                     | 19             | 3.80               | 2                                             | 19: two-copy homozygote                   |
| 16200830        | 1.19               | 1                     | 6              | 1.98               | 1                                             | 6: single-copy homozygote                 |
| 16200833        | 0.92               | 1                     | 5              | 1.99               | 1                                             | 5: single-copy homozygote                 |
| 16200025        | 1.11               | 1                     | 1              | 2.29               | 1                                             | 1: single-copy homozygote                 |
| 16200137        | 1.26               | 1                     | 1              | 1.86               | 1                                             | 1: single-copy homozygote                 |
| 16200179        | 1.22               | 1                     | 8              | 1.99               | 1                                             | 8: single-copy homozygote                 |
| 16200338        | 1.13               | 1                     | 11             | 1.93               | 1                                             | 11: single-copy homozygote                |

| Transgenic Line | T <sub>0</sub>     |                       | T <sub>1</sub> |                    |                                               | T <sub>2</sub>                            |
|-----------------|--------------------|-----------------------|----------------|--------------------|-----------------------------------------------|-------------------------------------------|
|                 | Ratio (target/ref) | Estimated Copy Number | Homozygote No. | Ratio (target/ref) | Estimated Copy Number of T <sub>0</sub> Plant | Verification of T <sub>1</sub> Homozygote |
| 16200348        | 1.17               | 1                     | 7              | 1.94               | 1                                             | 7: single-copy homozygote                 |
| 15100378        | 1.10               | 1                     | 16             | 1.93               | 1                                             | 16: single-copy homozygote                |
| 15370256        | 1.04               | 1                     | 4              | 1.88               | 1                                             | 4: single-copy homozygote                 |
| 16111246        | 1.31               | 1                     | 2              | 2.02               | 1                                             | 2: single-copy homozygote                 |
| 16120982        | 1.15               | 1                     | 4              | 1.95               | 1                                             | 4: single-copy homozygote                 |
| 15180153        | 0.76               | 1                     | 1              | 1.99               | 1                                             | 1: single-copy homozygote                 |
| 15400709        | 1.21               | 1                     | 3              | 1.85               | 1                                             | 3: single-copy homozygote                 |
| 16220285        | 1.19               | 1                     | 3              | 1.90               | 1                                             | 3: single-copy homozygote                 |
| 16230325        | 0.99               | 1                     | 4              | 1.96               | 1                                             | 4: single-copy homozygote                 |
| 17150141        | 1.3                | 1                     | 2              | 2.03               | 1                                             | 2: single-copy homozygote                 |
| 17180656        | 1.22               | 1                     | 1              | 2.01               | 1                                             | 1: single-copy homozygote                 |
| 16250281        | 1.39               | 1                     | 3              | 2.16               | 1                                             | 3: single-copy homozygote                 |
| 17050112        | 1.05               | 1                     | 6              | 1.93               | 1                                             | 6: single-copy homozygote                 |
| 17070459        | 1.15               | 1                     | 6              | 2.23               | 1                                             | 6: single-copy homozygote                 |
| 17090207        | 1.24               | 1                     | 4              | 1.92               | 1                                             | 4: single-copy homozygote                 |
| 17090276        | 1.18               | 1                     | 1              | 2.26               | 1                                             | 1: single-copy homozygote                 |
| 16280076        | 1.38               | 1                     | 1              | 2.07               | 1                                             | 1: single-copy homozygote                 |
| 17070193        | 1.12               | 1                     | 2              | 2.16               | 1                                             | 2: single-copy homozygote                 |
| 17140460        | 1.38               | 1                     | 8              | 2.03               | 1                                             | 8: single-copy homozygote                 |
| 16200960        | 1.05               | 1                     | 10             | 2.00               | 1                                             | 10: single-copy homozygote                |



| Transgenic Line | T <sub>0</sub>     |                       | T <sub>1</sub> |                    |                                               | T <sub>2</sub>                            |
|-----------------|--------------------|-----------------------|----------------|--------------------|-----------------------------------------------|-------------------------------------------|
|                 | Ratio (target/ref) | Estimated Copy Number | Homozygote No. | Ratio (target/ref) | Estimated Copy Number of T <sub>0</sub> Plant | Verification of T <sub>1</sub> Homozygote |
| 16200980        | 1.11               | 1                     | 2              | 1.99               | 1                                             | 2: single-copy homozygote                 |
| 16260169        | 1.26               | 1                     | 7              | 2.15               | 1                                             | 7: single-copy homozygote                 |
| 16210595        | 1.27               | 1                     | 12             | 2.19               | 1                                             | 12: single-copy homozygote                |
| 16220386        | 1.15               | 1                     | 18             | 2.03               | 1                                             | 18: single-copy homozygote                |
| 16240428        | 1.07               | 1                     | 4              | 1.93               | 1                                             | 4: single-copy homozygote                 |
| 16250421        | 0.91               | 1                     | 5              | 2.02               | 1                                             | 5: single-copy homozygote                 |
| 16230229        | 0.96               | 1                     | 11             | 2.00               | 1                                             | 11: single-copy homozygote                |
| 16270288        | 1.09               | 1                     | 14             | 1.94               | 1                                             | 14: single-copy homozygote                |
| 17180279        | 1.12               | 1                     | 9              | 2.02               | 1                                             | 9: single-copy homozygote                 |
| 16080216        | 1.28               | 1                     | 2              | 2.04               | 1                                             | 2: single-copy homozygote                 |
| 16110635        | 1.28               | 1                     | 11             | 2.20               | 1                                             | 11: single-copy homozygote                |
| 16110658        | 1.05               | 1                     | 1              | 2.05               | 1                                             | 1: single-copy homozygote                 |
| 16131015        | 1.39               | 1                     | 16             | 2.14               | 1                                             | 16: single-copy homozygote                |
| 16120203        | 0.85               | 1                     | 1              | 1.92               | 1                                             | 1: single-copy homozygote                 |
| 15111365        | 1.28               | 1                     | 9              | 1.96               | 1                                             | 9: single-copy homozygote                 |
| 16200799        | 0.67               | 1                     | 7              | 1.88               | 1                                             | 7: single-copy homozygote                 |
| 16200800        | 1.05               | 1                     | 7              | 1.74               | 1                                             | 7: single-copy homozygote                 |
| 15030070        | 1.00               | 1                     | 15             | 3.72               | 2                                             | 15: two-copy homozygote                   |
| 15311264        | 1.01               | 1                     | 12             | 1.93               | 1                                             | 12: single-copy homozygote                |
| 15230050        | 1.18               | 1                     | 14             | 2.11               | 1                                             | 14: single-copy homozygote                |

| Transgenic Line | T <sub>0</sub>     |                       | T <sub>1</sub> |                    |                                               | T <sub>2</sub>                            |
|-----------------|--------------------|-----------------------|----------------|--------------------|-----------------------------------------------|-------------------------------------------|
|                 | Ratio (target/ref) | Estimated Copy Number | Homozygote No. | Ratio (target/ref) | Estimated Copy Number of T <sub>0</sub> Plant | Verification of T <sub>1</sub> Homozygote |
| 15370346        | 1.37               | 1                     | 14             | 2.06               | 1                                             | 14: single-copy homozygote                |
| 15340411        | 1.20               | 1                     | 4              | 2.04               | 1                                             | 4: single-copy homozygote                 |
| 15310320        | 1.28               | 1                     | 9              | 2.34               | 1                                             | 9: single-copy homozygote                 |
| 15360422        | 1.15               | 1                     | 14             | 1.77               | 1                                             | 14: single-copy homozygote                |
| 16121179        | 1.34               | 1                     | 2              | 2.06               | 1                                             | 2: single-copy homozygote                 |
| 16121200        | 1.23               | 1                     | 2              | 2.04               | 1                                             | 2: single-copy homozygote                 |
| 16160491        | 1.19               | 1                     | 1              | 1.75               | 1                                             | 1: single-copy homozygote                 |
| 16490163        | 0.94               | 1                     | 3              | 2.13               | 1                                             | 3: single-copy homozygote                 |
| 16490208        | 1.11               | 1                     | 18             | 2.05               | 1                                             | 18: single-copy homozygote                |
| 16110037        | 1.33               | 1                     | 15             | 1.93               | 1                                             | 15: single-copy homozygote                |
| 16160944        | 1.25               | 1                     | 10             | 1.83               | 1                                             | 10: single-copy homozygote                |
| 16490145        | 1.01               | 1                     | 1              | 1.93               | 1                                             | 1: single-copy homozygote                 |
| 15490819        | 0.71               | 1                     | 3              | 3.87               | 2                                             | 3: two-copy homozygote                    |
| 16010742        | 0.48               | 0                     | 2              | 1.89               | 1                                             | 2: single-copy homozygote                 |
| 16020015        | 1.39               | 1                     | 16             | 2.19               | 1                                             | 16: single-copy homozygote                |
| 16190387        | 1.31               | 1                     | 14             | 2.04               | 1                                             | 14: single-copy homozygote                |
| 16470211        | 0.87               | 1                     | 16             | 1.91               | 1                                             | 16: single-copy homozygote                |
| 16490167        | 0.91               | 1                     | 18             | 1.91               | 1                                             | 18: single-copy homozygote                |
| 17010448        | 1.27               | 1                     | 3              | 2.04               | 1                                             | 3: single-copy homozygote                 |
| 16110433        | 1.33               | 1                     | 17             | 1.95               | 1                                             | 17: single-copy homozygote                |

| Transgenic Line | T <sub>0</sub>     |                       | T <sub>1</sub> |                    |                                               | T <sub>2</sub>                            |
|-----------------|--------------------|-----------------------|----------------|--------------------|-----------------------------------------------|-------------------------------------------|
|                 | Ratio (target/ref) | Estimated Copy Number | Homozygote No. | Ratio (target/ref) | Estimated Copy Number of T <sub>0</sub> Plant | Verification of T <sub>1</sub> Homozygote |
| 16121340        | 1.14               | 1                     | 5              | 2.04               | 1                                             | 5: single-copy homozygote                 |
| 16500122        | 1.31               | 1                     | 5              | 2.02               | 1                                             | 5: single-copy homozygote                 |
| 17070470        | 1.01               | 1                     | 1              | 2.60               | 1                                             | 1: single-copy homozygote                 |
| 16500438        | 1.21               | 1                     | 13             | 2.01               | 1                                             | 13: single-copy homozygote                |
| 17050163        | 1.01               | 1                     | 12             | 1.99               | 1                                             | 12: single-copy homozygote                |
| 17150497        | 1.15               | 1                     | 11             | 1.98               | 1                                             | 11: single-copy homozygote                |
| 17160211        | 1.16               | 1                     | 1              | 1.92               | 1                                             | 1: single-copy homozygote                 |
| 17010328        | 1.37               | 1                     | 14             | 2.02               | 1                                             | 14: single-copy homozygote                |
| 17010418        | 1.37               | 1                     | 1              | 1.92               | 1                                             | 1: single-copy homozygote                 |
| 17030189        | 1.09               | 1                     | 1              | 2.19               | 1                                             | 1: single-copy homozygote                 |
| 16500131        | 0.67               | 1                     | 11             | 2.06               | 1                                             | 11: single-copy homozygote                |
| 16500504        | 1.16               | 1                     | 17             | 2.01               | 1                                             | 17: single-copy homozygote                |
| 16500505        | 1.29               | 1                     | 11             | 2.08               | 1                                             | 11: single-copy homozygote                |
| 17020427        | 1.12               | 1                     | 4              | 1.98               | 1                                             | 4: single-copy homozygote                 |
| 17010089        | 1.26               | 1                     | 19             | 1.89               | 1                                             | 19: single-copy homozygote                |
| 17010090        | 1.31               | 1                     | 11             | 1.96               | 1                                             | 11: single-copy homozygote                |
| 17010492        | 0.89               | 1                     | 7              | 2.04               | 1                                             | 7: single-copy homozygote                 |
| 17070198        | 1.07               | 1                     | 12             | 2.06               | 1                                             | 12: two-copy homozygote                   |
| 17070199        | 1.28               | 1                     | 6              | 2.02               | 1                                             | 6: single-copy homozygote                 |
| 16120722        | 1.22               | 1                     | 11             | 1.90               | 1                                             | 11: single-copy homozygote                |

| Transgenic Line | T <sub>0</sub>     |                       | T <sub>1</sub> |                    |                                               | T <sub>2</sub>                            |
|-----------------|--------------------|-----------------------|----------------|--------------------|-----------------------------------------------|-------------------------------------------|
|                 | Ratio (target/ref) | Estimated Copy Number | Homozygote No. | Ratio (target/ref) | Estimated Copy Number of T <sub>0</sub> Plant | Verification of T <sub>1</sub> Homozygote |
| 16120721        | 1.21               | 1                     | 5              | 1.96               | 1                                             | 5: single-copy homozygote                 |
| 16190134        | 1.34               | 1                     | 9              | 1.95               | 1                                             | 9: single-copy homozygote                 |
| 16220324        | 1.26               | 1                     | 1              | 2.19               | 1                                             | 1: single-copy homozygote                 |
| 16270084        | 1.01               | 1                     | 11             | 1.97               | 1                                             | 11: single-copy homozygote                |
| 16140576        | 1.05               | 1                     | 11             | 2.08               | 1                                             | 11: single-copy homozygote                |
| 16090621        | 1.28               | 1                     | 6              | 2.32               | 1                                             | 6: single-copy homozygote                 |
| 16120732        | 1.10               | 1                     | 8              | 2.05               | 1                                             | 8: single-copy homozygote                 |
| 17100020        | 0.96               | 1                     | 7              | 2.03               | 1                                             | 7: single-copy homozygote                 |
| 17100298        | 1.15               | 1                     | 2              | 2.20               | 1                                             | 2: single-copy homozygote                 |
| 17140548        | 1.13               | 1                     | 9              | 1.88               | 1                                             | 9: single-copy homozygote                 |
| 17180838        | 1.25               | 1                     | 18             | 2.03               | 1                                             | 18: single-copy homozygote                |
| 17140735        | 1.1                | 1                     | 1              | 2.06               | 1                                             | 1: single-copy homozygote                 |
| 16170219        | 1.09               | 1                     | 7              | 2.28               | 1                                             | 7: single-copy homozygote                 |
| 16170223        | 1.29               | 1                     | 2              | 1.88               | 1                                             | 2: single-copy homozygote                 |
| 16220093        | 1.36               | 1                     | 7              | 2.03               | 1                                             | 7: single-copy homozygote                 |
| 16220226        | 1.32               | 1                     | 1              | 1.93               | 1                                             | 1: single-copy homozygote                 |
| 16220203        | 1.18               | 1                     | 6              | 2.01               | 1                                             | 6: single-copy homozygote                 |
| 16190269        | 0.88               | 1                     | 1              | 1.89               | 1                                             | 1: single-copy homozygote                 |
| 15500833        | 1.23               | 1                     | 5              | 2.13               | 1                                             | 5: single-copy homozygote                 |
| 15500834        | 1.06               | 1                     | 18             | 2.11               | 1                                             | 18: single-copy homozygote                |

| Transgenic Line | T <sub>0</sub>     |                       | T <sub>1</sub> |                    |                                               | T <sub>2</sub>                            |
|-----------------|--------------------|-----------------------|----------------|--------------------|-----------------------------------------------|-------------------------------------------|
|                 | Ratio (target/ref) | Estimated Copy Number | Homozygote No. | Ratio (target/ref) | Estimated Copy Number of T <sub>0</sub> Plant | Verification of T <sub>1</sub> Homozygote |
| 16210455        | 1.36               | 1                     | 2              | 2.24               | 1                                             | 2: single-copy homozygote                 |
| 15491637        | 1.28               | 1                     | 15             | 2.01               | 1                                             | 15: single-copy homozygote                |
| 15510469        | 1.39               | 1                     | 17             | 1.92               | 1                                             | 17: single-copy homozygote                |
| 15481704        | 1.29               | 1                     | 3              | 2.01               | 1                                             | 3: single-copy homozygote                 |
| 16020213        | 1.19               | 1                     | 1              | 1.78               | 1                                             | 1: single-copy homozygote                 |
| 16020249        | 1.33               | 1                     | 7              | 2.55               | 1                                             | 7: single-copy homozygote                 |
| 16020098        | 1.33               | 1                     | 5              | 1.92               | 1                                             | 5: single-copy homozygote                 |
| 15470232        | 1.16               | 1                     | 5              | 1.90               | 1                                             | 5: single-copy homozygote                 |
| 15481129        | 1.07               | 1                     | 20             | 1.87               | 1                                             | 20: single-copy homozygote                |
| 15480571        | 1.15               | 1                     | 10             | 1.99               | 1                                             | 10: single-copy homozygote                |
| 15491486        | 1.31               | 1                     | 3              | 2.09               | 1                                             | 3: single-copy homozygote                 |
| 16020230        | 1.20               | 1                     | 11             | 2.07               | 1                                             | 11: single-copy homozygote                |
| 17150094        | 0.95               | 1                     | 1              | 2.32               | 1                                             | 1: single-copy homozygote                 |
| 17030194        | 1.29               | 1                     | 1              | 1.92               | 1                                             | 1: single-copy homozygote                 |
| 16500240        | 1.35               | 1                     | 15             | 1.99               | 1                                             | 15: single-copy homozygote                |
| 16500485        | 1.16               | 1                     | 14             | 1.95               | 1                                             | 14: single-copy homozygote                |
| 16490095        | 1.15               | 1                     | 23             | 1.96               | 1                                             | 23: single-copy homozygote                |
| 17030214        | 1.27               | 1                     | 2              | 2.03               | 1                                             | 2: single-copy homozygote                 |
| 17030238        | 1.36               | 1                     | 4              | 2.16               | 1                                             | 4: single-copy homozygote                 |
| 17080227        | 1.01               | 1                     | 2              | 2.00               | 1                                             | 2: single-copy homozygote                 |

| Transgenic Line | T <sub>0</sub>     |                       | T <sub>1</sub> |                    |                                               | T <sub>2</sub>                            |
|-----------------|--------------------|-----------------------|----------------|--------------------|-----------------------------------------------|-------------------------------------------|
|                 | Ratio (target/ref) | Estimated Copy Number | Homozygote No. | Ratio (target/ref) | Estimated Copy Number of T <sub>0</sub> Plant | Verification of T <sub>1</sub> Homozygote |
| 16490024        | 1.2                | 1                     | 4              | 1.97               | 1                                             | 4: single-copy homozygote                 |
| 17020141        | 1.15               | 1                     | 3              | 2.13               | 1                                             | 3: single-copy homozygote                 |
| 16500109        | 0.95               | 1                     | 1              | 2.06               | 1                                             | 1: single-copy homozygote                 |
| 16500251        | 0.88               | 1                     | 7              | 1.99               | 1                                             | 7: single-copy homozygote                 |
| 17060126        | 1.02               | 1                     | 3              | 1.83               | 1                                             | 3: single-copy homozygote                 |
| 16460225        | 0.89               | 1                     | 16             | 2.01               | 1                                             | 16: single-copy homozygote                |
| 17050386        | 1.12               | 1                     | 6              | 1.97               | 1                                             | 6: two-copy homozygote                    |
| 17080147        | 1.36               | 1                     | 1              | 1.81               | 1                                             | 1: single-copy homozygote                 |
| 17010225        | 1.38               | 1                     | 10             | 1.97               | 1                                             | 10: single-copy homozygote                |
| 17020190        | 1.04               | 1                     | 4              | 2.20               | 1                                             | 4: single-copy homozygote                 |
| 17020028        | 0.67               | 1                     | 1              | 2.11               | 1                                             | 1: single-copy homozygote                 |
| 17010011        | 0.95               | 1                     | 1              | 1.92               | 1                                             | 1: single-copy homozygote                 |
| 17030127        | 1                  | 1                     | 10             | 2.07               | 1                                             | 10: single-copy homozygote                |
| 17200288        | 1.17               | 1                     | 7              | 2.08               | 1                                             | 7: single-copy homozygote                 |
| 16490008        | 1.11               | 1                     | 17             | 1.98               | 1                                             | 17: single-copy homozygote                |
| 17020377        | 0.93               | 1                     | 3              | 2.08               | 1                                             | 3: single-copy homozygote                 |
| 17030306        | 1.21               | 1                     | 9              | 2.36               | 1                                             | 9: single-copy homozygote                 |
| 16480096        | 0.73               | 1                     | 9              | 2.04               | 1                                             | 9: single-copy homozygote                 |
| 16480097        | 0.88               | 1                     | 2              | 2.24               | 1                                             | 2: single-copy homozygote                 |
| 16480106        | 0.8                | 1                     | 12             | 2.19               | 1                                             | 12: single-copy homozygote                |

| Transgenic Line | T <sub>0</sub>     |                       | T <sub>1</sub> |                    |                                               | T <sub>2</sub>                            |
|-----------------|--------------------|-----------------------|----------------|--------------------|-----------------------------------------------|-------------------------------------------|
|                 | Ratio (target/ref) | Estimated Copy Number | Homozygote No. | Ratio (target/ref) | Estimated Copy Number of T <sub>0</sub> Plant | Verification of T <sub>1</sub> Homozygote |
| 16480136        | 0.92               | 1                     | 17             | 1.94               | 1                                             | 17: single-copy homozygote                |
| 16490119        | 1.03               | 1                     | 16             | 2.33               | 1                                             | 16: single-copy homozygote                |
| 17010441        | 1.29               | 1                     | 18             | 2.05               | 1                                             | 18: single-copy homozygote                |
| 17010442        | 1.28               | 1                     | 12             | 2.23               | 1                                             | 12: single-copy homozygote                |
| 16480076        | 0.67               | 1                     | 3              | 1.97               | 1                                             | 3: single-copy homozygote                 |
| 16490185        | 0.87               | 1                     | 8              | 2.21               | 1                                             | 8: single-copy homozygote                 |
| 17080331        | 1.1                | 1                     | 3              | 2.31               | 1                                             | 3: single-copy homozygote                 |
| 17090073        | 1.39               | 1                     | 1              | 2.56               | 1                                             | 1: single-copy homozygote                 |
| 17090058        | 1.1                | 1                     | 4              | 2.03               | 1                                             | 4: single-copy homozygote                 |
| 17140912        | 1.14               | 1                     | 1              | 2.30               | 1                                             | 1: single-copy homozygote                 |
| 17050487        | 1.14               | 1                     | 1              | 2.48               | 1                                             | 1: single-copy homozygote                 |
| 17100030        | 1.37               | 1                     | 1              | 2.51               | 1                                             | 1: single-copy homozygote                 |
| 17100200        | 1.15               | 1                     | 2              | 1.90               | 1                                             | 2: single-copy homozygote                 |
| 17150033        | 1.3                | 1                     | 11             | 2.00               | 1                                             | 11: single-copy homozygote                |
| 17150034        | 1.3                | 1                     | 12             | 2.08               | 1                                             | 12: single-copy homozygote                |
| 17160463        | 0.62               | 1                     | 8              | 2.00               | 1                                             | 8: single-copy homozygote                 |
| 17080010        | 1.01               | 1                     | 4              | 2.03               | 1                                             | 4: single-copy homozygote                 |
| 17030152        | 1.01               | 1                     | 1              | 2.09               | 1                                             | 1: single-copy homozygote                 |
| 17030154        | 1.25               | 1                     | 3              | 2.35               | 1                                             | 3: single-copy homozygote                 |
| 17040016        | 1.26               | 1                     | 11             | 1.98               | 1                                             | 11: single-copy homozygote                |

| Transgenic Line | T <sub>0</sub>     |                       | T <sub>1</sub> |                    |                                               | T <sub>2</sub>                            |
|-----------------|--------------------|-----------------------|----------------|--------------------|-----------------------------------------------|-------------------------------------------|
|                 | Ratio (target/ref) | Estimated Copy Number | Homozygote No. | Ratio (target/ref) | Estimated Copy Number of T <sub>0</sub> Plant | Verification of T <sub>1</sub> Homozygote |
| 17050501        | 1.03               | 1                     | 5              | 2.01               | 1                                             | 5: single-copy homozygote                 |
| 17090148        | 1.38               | 1                     | 1              | 2.06               | 1                                             | 1: single-copy homozygote                 |
| 17070282        | 0.67               | 1                     | 1              | 2.05               | 1                                             | 1: single-copy homozygote                 |
| 17120288        | 0.99               | 1                     | 1              | 2.15               | 1                                             | 1: single-copy homozygote                 |
| 17140048        | 1.23               | 1                     | 16             | 1.96               | 1                                             | 16: single-copy homozygote                |
| 17160143        | 0.98               | 1                     | 5              | 2.02               | 1                                             | 5: single-copy homozygote                 |
| 17160145        | 0.97               | 1                     | 10             | 2.00               | 1                                             | 10: single-copy homozygote                |
| 17110048        | 0.99               | 1                     | 5              | 1.98               | 1                                             | 5: single-copy homozygote                 |
| 17180859        | 1.18               | 1                     | 1              | 2.01               | 1                                             | 1: single-copy homozygote                 |
| 17150185        | 0.88               | 1                     | 3              | 1.96               | 1                                             | 3: single-copy homozygote                 |
| 17150280        | 1.08               | 1                     | 7              | 1.80               | 1                                             | 7: single-copy homozygote                 |
| 17151138        | 0.86               | 1                     | 3              | 2.08               | 1                                             | 3: single-copy homozygote                 |
| 17180501        | 1.26               | 1                     | 9              | 1.93               | 1                                             | 9: single-copy homozygote                 |
| 17150076        | 1.26               | 1                     | 2              | 2.12               | 1                                             | 2: single-copy homozygote                 |
| 17180217        | 1.01               | 1                     | 7              | 2.15               | 1                                             | 7: single-copy homozygote                 |
| 17100412        | 1.06               | 1                     | 7              | 1.82               | 1                                             | 7: single-copy homozygote                 |
| 17080254        | 1.29               | 1                     | 3              | 2.07               | 1                                             | 3: single-copy homozygote                 |
| 17140788        | 1.03               | 1                     | 2              | 2.25               | 1                                             | 2: single-copy homozygote                 |
| 17140847        | 1.13               | 1                     | 4              | 1.94               | 1                                             | 4: single-copy homozygote                 |
| 17140943        | 1.22               | 1                     | 7              | 2.10               | 1                                             | 7: single-copy homozygote                 |



| Transgenic Line | T <sub>0</sub>     |                       | T <sub>1</sub> |                    |                                               | T <sub>2</sub>                            |
|-----------------|--------------------|-----------------------|----------------|--------------------|-----------------------------------------------|-------------------------------------------|
|                 | Ratio (target/ref) | Estimated Copy Number | Homozygote No. | Ratio (target/ref) | Estimated Copy Number of T <sub>0</sub> Plant | Verification of T <sub>1</sub> Homozygote |
| 17150377        | 1.24               | 1                     | 7              | 2.02               | 1                                             | 7: single-copy homozygote                 |
| 17150506        | 1.06               | 1                     | 4              | 1.98               | 1                                             | 4: single-copy homozygote                 |
| 17150256        | 0.91               | 1                     | 5              | 2.23               | 1                                             | 5: single-copy homozygote                 |
| 17170024        | 1.37               | 1                     | 13             | 4.40               | 2                                             | 13: two-copy homozygote                   |
| 17240091        | 1.12               | 1                     | 15             | 2.19               | 1                                             | 15: single-copy homozygote                |
| 17150340        | 1.22               | 1                     | 9              | 2.01               | 1                                             | 9: single-copy homozygote                 |
| 17160082        | 0.58               | 1                     | 5              | 1.94               | 1                                             | 5: single-copy homozygote                 |
| 17180016        | 1.17               | 1                     | 12             | 2.13               | 1                                             | 12: single-copy homozygote                |
| 16230335        | 1.11               | 1                     | 8              | 2.04               | 1                                             | 8: single-copy homozygote                 |
| 17290342        | 0.95               | 1                     | 2              | 2.17               | 1                                             | 2: single-copy homozygote                 |
| 17310967        | 1.21               | 1                     | 3              | 1.88               | 1                                             | 3: single-copy homozygote                 |
| 17310976        | 1.38               | 1                     | 10             | 2.16               | 1                                             | 10: single-copy homozygote                |
| 17110120        | 1.14               | 1                     | 14             | 2.01               | 1                                             | 14: single-copy homozygote                |
| 17260832        | 1.18               | 1                     | 11             | 2.02               | 1                                             | 11: single-copy homozygote                |
| 17290703        | 1.09               | 1                     | 4              | 2.03               | 1                                             | 4: single-copy homozygote                 |
| 17300237        | 1.17               | 1                     | 6              | 2.24               | 1                                             | 6: single-copy homozygote                 |
| 17420725        | 0.97               | 1                     | 5              | 1.88               | 1                                             | 5: single-copy homozygote                 |
| 17290678        | 1.05               | 1                     | 1              | 2.09               | 1                                             | 1: single-copy homozygote                 |
| 17290891        | 0.95               | 1                     | 3              | 1.96               | 1                                             | 3: single-copy homozygote                 |
| 17381034        | 1.34               | 1                     | 5              | 1.95               | 1                                             | 5: single-copy homozygote                 |

| Transgenic Line | T <sub>0</sub>     |                       | T <sub>1</sub> |                    |                                               | T <sub>2</sub>                            |
|-----------------|--------------------|-----------------------|----------------|--------------------|-----------------------------------------------|-------------------------------------------|
|                 | Ratio (target/ref) | Estimated Copy Number | Homozygote No. | Ratio (target/ref) | Estimated Copy Number of T <sub>0</sub> Plant | Verification of T <sub>1</sub> Homozygote |
| 17320076        | 1.02               | 1                     | 7              | 2.01               | 1                                             | 7: single-copy homozygote                 |
| 17320077        | 1.00               | 1                     | 1              | 2.10               | 1                                             | 1: single-copy homozygote                 |
| 17340728        | 1.07               | 1                     | 1              | 2.25               | 1                                             | 1: single-copy homozygote                 |
| 17200027        | 1.36               | 1                     | 8              | 1.96               | 1                                             | 8: single-copy homozygote                 |
| 17310457        | 1.23               | 1                     | 7              | 2.08               | 1                                             | 7: single-copy homozygote                 |
| 17320097        | 1.18               | 1                     | 4              | 1.99               | 1                                             | 4: single-copy homozygote                 |
| 17320108        | 1.09               | 1                     | 1              | 1.95               | 1                                             | 1: single-copy homozygote                 |
| 17370705        | 0.88               | 1                     | 2              | 1.96               | 1                                             | 2: single-copy homozygote                 |
| 17310140        | 1.30               | 1                     | 2              | 1.99               | 1                                             | 2: single-copy homozygote                 |
| 17320378        | 1.27               | 1                     | 11             | 1.98               | 1                                             | 11: single-copy homozygote                |
| 17360210        | 1.30               | 1                     | 19             | 2.02               | 1                                             | 19: single-copy homozygote                |
| 17381037        | 1.20               | 1                     | 2              | 1.99               | 1                                             | 2: single-copy homozygote                 |
| 17420577        | 1.18               | 1                     | 1              | 2.07               | 1                                             | 1: single-copy homozygote                 |
| 17420711        | 0.99               | 1                     | 2              | 2.00               | 1                                             | 2: single-copy homozygote                 |
| 17120020        | 0.91               | 1                     | 1              | 1.80               | 1                                             | 1: single-copy homozygote                 |
| 17330476        | 0.95               | 1                     | 13             | 1.98               | 1                                             | 13: single-copy homozygote                |
| 17330478        | 0.90               | 1                     | 13             | 1.97               | 1                                             | 13: single-copy homozygote                |
| 17341572        | 1.18               | 1                     | 16             | 1.98               | 1                                             | 16: single-copy homozygote                |
| 17391699        | 1.32               | 1                     | 12             | 1.95               | 1                                             | 12: single-copy homozygote                |
| 17260657        | 1.24               | 1                     | 9              | 1.98               | 1                                             | 9: single-copy homozygote                 |

| Transgenic Line | T <sub>0</sub>     |                       | T <sub>1</sub> |                    |                                               | T <sub>2</sub>                            |
|-----------------|--------------------|-----------------------|----------------|--------------------|-----------------------------------------------|-------------------------------------------|
|                 | Ratio (target/ref) | Estimated Copy Number | Homozygote No. | Ratio (target/ref) | Estimated Copy Number of T <sub>0</sub> Plant | Verification of T <sub>1</sub> Homozygote |
| 17260668        | 1.07               | 1                     | 10             | 2.13               | 1                                             | 10: single-copy homozygote                |
| 17320918        | 1.03               | 1                     | 10             | 1.85               | 1                                             | 10: single-copy homozygote                |
| 17360337        | 1.16               | 1                     | 1              | 1.99               | 1                                             | 1: single-copy homozygote                 |
| 17080349        | 0.87               | 1                     | 1              | 2.08               | 1                                             | 1: single-copy homozygote                 |
| 17190211        | 1.27               | 1                     | 10             | 2.05               | 1                                             | 10: single-copy homozygote                |
| 17370323        | 0.86               | 1                     | 10             | 2.13               | 1                                             | 10: single-copy homozygote                |
| 17400365        | 1.32               | 1                     | 3              | 1.86               | 1                                             | 3: single-copy homozygote                 |
| 17340577        | 1.05               | 1                     | 21             | 2.10               | 1                                             | 21: single-copy homozygote                |
| 17340815        | 1.06               | 1                     | 20             | 2.01               | 1                                             | 20: single-copy homozygote                |
| 17360287        | 1.13               | 1                     | 8              | 1.97               | 1                                             | 8: single-copy homozygote                 |
| 17360321        | 1.11               | 1                     | 3              | 1.83               | 1                                             | 3: single-copy homozygote                 |
| 17350046        | 1.25               | 1                     | 8              | 2.20               | 1                                             | 8: single-copy homozygote                 |
| 17370371        | 0.69               | 1                     | 17             | 4.12               | 2                                             | 17: two-copy homozygote                   |
| 17370792        | 1.29               | 1                     | 13             | 1.99               | 1                                             | 13: single-copy homozygote                |
| 17370813        | 1.10               | 1                     | 7              | 2.05               | 1                                             | 7: single-copy homozygote                 |
| 17350570        | 1.24               | 1                     | 19             | 2.00               | 1                                             | 19: single-copy homozygote                |
| 17360133        | 1.32               | 1                     | 22             | 2.13               | 1                                             | 22: single-copy homozygote                |
| 17370694        | 1.17               | 1                     | 5              | 1.84               | 1                                             | 5: single-copy homozygote                 |
| 17370706        | 1.05               | 1                     | 1              | 2.05               | 1                                             | 1: single-copy homozygote                 |
| 17380720        | 0.93               | 1                     | 13             | 2.01               | 1                                             | 13: single-copy homozygote                |

| Transgenic Line | T <sub>0</sub>     |                       | T <sub>1</sub> |                    |                                               | T <sub>2</sub>                            |
|-----------------|--------------------|-----------------------|----------------|--------------------|-----------------------------------------------|-------------------------------------------|
|                 | Ratio (target/ref) | Estimated Copy Number | Homozygote No. | Ratio (target/ref) | Estimated Copy Number of T <sub>0</sub> Plant | Verification of T <sub>1</sub> Homozygote |
| 17380924        | 1.07               | 1                     | 6              | 2.00               | 1                                             | 6: single-copy homozygote                 |
| 17390522        | 1.08               | 1                     | 12             | 1.99               | 1                                             | 12: single-copy homozygote                |
| 16470310        | 0.91               | 1                     | 21             | 1.98               | 1                                             | 21: single-copy homozygote                |
| 17360304        | 1.12               | 1                     | 11             | 1.94               | 1                                             | 11: single-copy homozygote                |
| 17400608        | 1.23               | 1                     | 1              | 1.81               | 1                                             | 1: single-copy homozygote                 |
| 17410880        | 1.26               | 1                     | 4              | 2.07               | 1                                             | 4: single-copy homozygote                 |
| 16460136        | 1.37               | 1                     | 19             | 1.98               | 1                                             | 19: single-copy homozygote                |
| 17321017        | 1.06               | 1                     | 10             | 2.05               | 1                                             | 10: single-copy homozygote                |
| 17360448        | 1.25               | 1                     | 9              | 1.85               | 1                                             | 9: single-copy homozygote                 |
| 17370869        | 1.25               | 1                     | 10             | 2.23               | 1                                             | 10: single-copy homozygote                |
| 17250894        | 1.07               | 1                     | 7              | 2.37               | 1                                             | 7: single-copy homozygote                 |
| 17220744        | 1.29               | 1                     | 20             | 2.01               | 1                                             | 20: single-copy homozygote                |
| 17190293        | 1.32               | 1                     | 10             | 1.97               | 1                                             | 10: single-copy homozygote                |
| 17290041        | 0.92               | 1                     | 7              | 2.48               | 1                                             | 7: single-copy homozygote                 |
| 17290056        | 1.35               | 1                     | 9              | 2.26               | 1                                             | 9: single-copy homozygote                 |
| 17320575        | 0.97               | 1                     | 7              | 2.07               | 1                                             | 7: single-copy homozygote                 |
| 17050471        | 0.95               | 1                     | 13             | 1.82               | 1                                             | 13: single-copy homozygote                |
| 17020304        | 0.59               | 1                     | 7              | 1.99               | 1                                             | 7: single-copy homozygote                 |
| 17421143        | 0.94               | 1                     | 8              | 2.10               | 1                                             | 8: single-copy homozygote                 |
| 17430859        | 1.20               | 1                     | 7              | 2.01               | 1                                             | 7: single-copy homozygote                 |

| Transgenic Line | T <sub>0</sub>     |                       | T <sub>1</sub> |                    |                                               | T <sub>2</sub>                            |
|-----------------|--------------------|-----------------------|----------------|--------------------|-----------------------------------------------|-------------------------------------------|
|                 | Ratio (target/ref) | Estimated Copy Number | Homozygote No. | Ratio (target/ref) | Estimated Copy Number of T <sub>0</sub> Plant | Verification of T <sub>1</sub> Homozygote |
| 17140918        | 1.30               | 1                     | 4              | 2.08               | 1                                             | 4: single-copy homozygote                 |
| 17160327        | 1.03               | 1                     | 7              | 1.85               | 1                                             | 7: single-copy homozygote                 |
| 17300349        | 0.81               | 1                     | 13             | 1.74               | 1                                             | 13: single-copy homozygote                |
| 17350688        | 1.39               | 1                     | 8              | 1.79               | 1                                             | 8: single-copy homozygote                 |
| 17380841        | 1.02               | 1                     | 6              | 1.87               | 1                                             | 6: single-copy homozygote                 |
| 17420753        | 1.23               | 1                     | 5              | 1.94               | 1                                             | 5: single-copy homozygote                 |
| 17110257        | 1.07               | 1                     | 6              | 1.88               | 1                                             | 6: single-copy homozygote                 |
| 17160467        | 1.07               | 1                     | 2              | 1.97               | 1                                             | 2: single-copy homozygote                 |
| 17420480        | 1.22               | 1                     | 1              | 1.99               | 1                                             | 1: single-copy homozygote                 |
| 17360109        | 1.17               | 1                     | 14             | 1.97               | 1                                             | 14: single-copy homozygote                |
| 17400381        | 1.11               | 1                     | 10             | 1.81               | 1                                             | 10: single-copy homozygote                |
| 17401359        | 1.24               | 1                     | 6              | 2.14               | 1                                             | 6: single-copy homozygote                 |
| 17150357        | 1.11               | 1                     | 2              | 1.88               | 1                                             | 2: single-copy homozygote                 |
| 17250580        | 1.11               | 1                     | 8              | 1.94               | 1                                             | 8: single-copy homozygote                 |
| 17310030        | 1.13               | 1                     | 12             | 1.80               | 1                                             | 12: single-copy homozygote                |
| 17350627        | 1.33               | 1                     | 9              | 1.91               | 1                                             | 9: single-copy homozygote                 |
| 17390165        | 1.26               | 1                     | 3              | 2.31               | 1                                             | 3: single-copy homozygote                 |
| 17331206        | 1.20               | 1                     | 6              | 1.93               | 1                                             | 6: single-copy homozygote                 |
| 17360295        | 1.09               | 1                     | 4              | 1.91               | 1                                             | 4: single-copy homozygote                 |
| 17400461        | 1.19               | 1                     | 12             | 2.07               | 1                                             | 12: single-copy homozygote                |

| Transgenic Line | T <sub>0</sub>     |                       | T <sub>1</sub> |                    |                                               | T <sub>2</sub>                            |
|-----------------|--------------------|-----------------------|----------------|--------------------|-----------------------------------------------|-------------------------------------------|
|                 | Ratio (target/ref) | Estimated Copy Number | Homozygote No. | Ratio (target/ref) | Estimated Copy Number of T <sub>0</sub> Plant | Verification of T <sub>1</sub> Homozygote |
| 17240038        | 1.20               | 1                     | 1              | 2.08               | 1                                             | 1: single-copy homozygote                 |
| 17240615        | 0.67               | 1                     | 5              | 2.01               | 1                                             | 5: single-copy homozygote                 |
| 17371088        | 1.18               | 1                     | 16             | 1.92               | 1                                             | 16: single-copy homozygote                |
| 17371197        | 1.07               | 1                     | 2              | 1.99               | 1                                             | 2: single-copy homozygote                 |
| 17400217        | 1.38               | 1                     | 12             | 1.97               | 1                                             | 12: single-copy homozygote                |
| 17330577        | 1.33               | 1                     | 16             | 2.33               | 1                                             | 16: single-copy homozygote                |
| 17391491        | 1.26               | 1                     | 5              | 1.84               | 1                                             | 5: single-copy homozygote                 |
| 17401101        | 1.30               | 1                     | 5              | 2.06               | 1                                             | 5: single-copy homozygote                 |
| 17370800        | 0.88               | 1                     | 3              | 1.85               | 1                                             | 3: single-copy homozygote                 |
| 17380421        | 1.33               | 1                     | 7              | 1.90               | 1                                             | 7: single-copy homozygote                 |
| 17390512        | 1.10               | 1                     | 5              | 1.98               | 1                                             | 5: single-copy homozygote                 |
| 17321119        | 0.98               | 1                     | 2              | 3.73               | 2                                             | 2: single-copy homozygote                 |
| 17370729        | 1.08               | 1                     | 19             | 2.04               | 1                                             | 19: single-copy homozygote                |
| 17360924        | 1.08               | 1                     | 14             | 1.93               | 1                                             | 14: single-copy homozygote                |
| 17290291        | 1.01               | 1                     | 7              | 1.97               | 1                                             | 7: single-copy homozygote                 |
| 17350476        | 0.66               | 1                     | 3              | 2.02               | 1                                             | 3: single-copy homozygote                 |
| 17321187        | 1.29               | 1                     | 6              | 1.94               | 1                                             | 6: single-copy homozygote                 |
| 17331467        | 1.15               | 1                     | 7              | 2.06               | 1                                             | 7: single-copy homozygote                 |
| 17350556        | 1.11               | 1                     | 2              | 2.03               | 1                                             | 2: single-copy homozygote                 |
| 17380528        | 1.35               | 1                     | 1              | 2.10               | 1                                             | 1: single-copy homozygote                 |

| Transgenic Line | T <sub>0</sub>     |                       | T <sub>1</sub> |                    |                                               | T <sub>2</sub>                            |
|-----------------|--------------------|-----------------------|----------------|--------------------|-----------------------------------------------|-------------------------------------------|
|                 | Ratio (target/ref) | Estimated Copy Number | Homozygote No. | Ratio (target/ref) | Estimated Copy Number of T <sub>0</sub> Plant | Verification of T <sub>1</sub> Homozygote |
| 17380547        | 1.02               | 1                     | 4              | 1.85               | 1                                             | 4: single-copy homozygote                 |
| 17300737        | 0.93               | 1                     | 8              | 1.89               | 1                                             | 8: single-copy homozygote                 |
| 17330212        | 1.10               | 1                     | 10             | 1.99               | 1                                             | 10: single-copy homozygote                |
| 17341673        | 1.18               | 1                     | 3              | 2.37               | 1                                             | 3: single-copy homozygote                 |
| 17391402        | 1.38               | 1                     | 12             | 2.14               | 1                                             | 12: single-copy homozygote                |
| 17410211        | 1.13               | 1                     | 6              | 1.91               | 1                                             | 6: single-copy homozygote                 |
| 17410267        | 1.08               | 1                     | 7              | 1.96               | 1                                             | 7: single-copy homozygote                 |
| 17391675        | 1.26               | 1                     | 23             | 2.30               | 1                                             | 23: single-copy homozygote                |
| 17410225        | 1.16               | 1                     | 10             | 1.95               | 1                                             | 10: single-copy homozygote                |
| 17340521        | 1.10               | 1                     | 18             | 1.89               | 1                                             | 18: single-copy homozygote                |
| 17390421        | 1.38               | 1                     | 15             | 2.18               | 1                                             | 15: single-copy homozygote                |
| 17390688        | 1.35               | 1                     | 5              | 1.86               | 1                                             | 5: single-copy homozygote                 |
| 17380057        | 1.31               | 1                     | 10             | 1.97               | 1                                             | 10: single-copy homozygote                |
| 17400755        | 1.12               | 1                     | 12             | 1.97               | 1                                             | 12: single-copy homozygote                |
| 17400796        | 1.01               | 1                     | 11             | 2.02               | 1                                             | 11: single-copy homozygote                |
| 17400852        | 1.24               | 1                     | 1              | 2.17               | 1                                             | 1: single-copy homozygote                 |
| 17400860        | 1.25               | 1                     | 22             | 1.89               | 1                                             | 22: single-copy homozygote                |
| 17380073        | 1.37               | 1                     | 12             | 2.03               | 1                                             | 12: single-copy homozygote                |
| 17380074        | 1.19               | 1                     | 1              | 2.35               | 1                                             | 1: single-copy homozygote                 |
| 17400821        | 1.21               | 1                     | 13             | 1.88               | 1                                             | 13: single-copy homozygote                |

| Transgenic Line | T <sub>0</sub>     |                       | T <sub>1</sub> |                    |                                               | T <sub>2</sub>                            |
|-----------------|--------------------|-----------------------|----------------|--------------------|-----------------------------------------------|-------------------------------------------|
|                 | Ratio (target/ref) | Estimated Copy Number | Homozygote No. | Ratio (target/ref) | Estimated Copy Number of T <sub>0</sub> Plant | Verification of T <sub>1</sub> Homozygote |
| 17380034        | 1.20               | 1                     | 20             | 2.01               | 1                                             | 20: single-copy homozygote                |
| 17380078        | 1.04               | 1                     | 3              | 1.95               | 1                                             | 3: single-copy homozygote                 |
| 17380080        | 0.95               | 1                     | 9              | 2.27               | 1                                             | 9: single-copy homozygote                 |
| 17380152        | 1.23               | 1                     | 5              | 2.25               | 1                                             | 5: single-copy homozygote                 |
| 17380026        | 1.11               | 1                     | 21             | 2.48               | 1                                             | 21: single-copy homozygote                |
| 17400869        | 1.23               | 1                     | 16             | 1.93               | 1                                             | 16: single-copy homozygote                |
| 17400699        | 1.11               | 1                     | 19             | 2.00               | 1                                             | 19: single-copy homozygote                |
| 17400920        | 1.17               | 1                     | 7              | 2.01               | 1                                             | 7: single-copy homozygote                 |
| 17391220        | 1.31               | 1                     | 5              | 1.99               | 1                                             | 5: single-copy homozygote                 |
| 17400787        | 1.29               | 1                     | 15             | 1.97               | 1                                             | 15: single-copy homozygote                |
| 17430880        | 1.22               | 1                     | 13             | 1.93               | 1                                             | 13: single-copy homozygote                |
| 15150366        | 0.98               | 1                     | 16             | 2.46               | 1                                             | 16: single-copy homozygote                |
| 16170210        | 1.29               | 1                     | 4              | 2.07               | 1                                             | 4: single-copy homozygote                 |
| 17180051        | 1.17               | 1                     | 3              | 2.05               | 1                                             | 3: single-copy homozygote                 |
| 16030331        | 1.20               | 1                     | 7              | 1.90               | 1                                             | 7: single-copy homozygote                 |
| 16060060        | 1.19               | 1                     | 16             | 1.92               | 1                                             | 16: single-copy homozygote                |
| 17371153        | 1.21               | 1                     | 14             | 2.27               | 1                                             | 14: single-copy homozygote                |
| 17371154        | 1.16               | 1                     | 13             | 2.47               | 1                                             | 13: single-copy homozygote                |
| 15470442        | 1.09               | 1                     | 12             | 2.05               | 1                                             | 12: single-copy homozygote                |
| 16490294        | 0.51               | 1                     | 3              | 1.93               | 1                                             | 3: single-copy homozygote                 |



| Transgenic Line | T <sub>0</sub>     |                       | T <sub>1</sub> |                    |                                               | T <sub>2</sub>                            |
|-----------------|--------------------|-----------------------|----------------|--------------------|-----------------------------------------------|-------------------------------------------|
|                 | Ratio (target/ref) | Estimated Copy Number | Homozygote No. | Ratio (target/ref) | Estimated Copy Number of T <sub>0</sub> Plant | Verification of T <sub>1</sub> Homozygote |
| 17100229        | 1.14               | 1                     | 11             | 2.09               | 1                                             | 11: single-copy homozygote                |
| 17320337        | 1.04               | 1                     | 2              | 1.91               | 1                                             | 2: single-copy homozygote                 |
| 16190071        | 1.38               | 1                     | 4              | 1.93               | 1                                             | 4: single-copy homozygote                 |
| 17150183        | 1.26               | 1                     | 3              | 2.21               | 1                                             | 3: single-copy homozygote                 |
| 17331028        | 1.13               | 1                     | 10             | 2.15               | 1                                             | 10: single-copy homozygote                |
| 17391209        | 1.23               | 1                     | 9              | 2.21               | 1                                             | 9: single-copy homozygote                 |
| 17410806        | 1.09               | 1                     | 14             | 2.30               | 1                                             | 14: single-copy homozygote                |
| 17430836        | 1.22               | 1                     | 14             | 2.21               | 1                                             | 14: single-copy homozygote                |
| 14340886        | 1.02               | 1                     | 15             | 1.99               | 1                                             | 15: single-copy homozygote                |
| 14280062        | 1.23               | 1                     | 3              | 1.90               | 1                                             | 3: single-copy homozygote                 |
| 15520678        | 1.37               | 1                     | 12             | 1.87               | 1                                             | 12: single-copy homozygote                |
| 15430634        | 1.14               | 1                     | 20             | 1.81               | 1                                             | 20: single-copy homozygote                |
| 17120047        | 0.98               | 1                     | 4              | 2.00               | 1                                             | 4: single-copy homozygote                 |
| 17470050        | 1.13               | 1                     | 17             | 2.12               | 1                                             | 17: single-copy homozygote                |
| 17481008        | 1.35               | 1                     | 4              | 2.49               | 1                                             | 4: single-copy homozygote                 |
| 17490773        | 1.18               | 1                     | 16             | 1.76               | 1                                             | 16: single-copy homozygote                |
| 17430786        | 1.11               | 1                     | 2              | 1.98               | 1                                             | 2: single-copy homozygote                 |
| 17440969        | 1.00               | 1                     | 23             | 2.00               | 1                                             | 23: single-copy homozygote                |
| 17450217        | 1.12               | 1                     | 4              | 2.01               | 1                                             | 4: single-copy homozygote                 |
| 17450490        | 1.33               | 1                     | 23             | 1.99               | 1                                             | 23: single-copy homozygote                |

| Transgenic Line | T <sub>0</sub>     |                       | T <sub>1</sub> |                    |                                               | T <sub>2</sub>                            |
|-----------------|--------------------|-----------------------|----------------|--------------------|-----------------------------------------------|-------------------------------------------|
|                 | Ratio (target/ref) | Estimated Copy Number | Homozygote No. | Ratio (target/ref) | Estimated Copy Number of T <sub>0</sub> Plant | Verification of T <sub>1</sub> Homozygote |
| 17450546        | 1.07               | 1                     | 3              | 1.93               | 1                                             | 3: single-copy homozygote                 |
| 17450584        | 1.28               | 1                     | 8              | 2.05               | 1                                             | 8: single-copy homozygote                 |
| 17451189        | 1.23               | 1                     | 13             | 2.24               | 1                                             | 13: single-copy homozygote                |
| 17451346        | 1.12               | 1                     | 2              | 2.26               | 1                                             | 2: single-copy homozygote                 |
| 17451923        | 1.05               | 1                     | 15             | 2.24               | 1                                             | 15: single-copy homozygote                |
| 17460009        | 0.87               | 1                     | 10             | 2.00               | 1                                             | 10: single-copy homozygote                |
| 17460040        | 1.06               | 1                     | 10             | 1.95               | 1                                             | 10: single-copy homozygote                |
| 17460120        | 1.01               | 1                     | 13             | 2.05               | 1                                             | 13: single-copy homozygote                |
| 17460123        | 1.17               | 1                     | 1              | 2.15               | 1                                             | 1: single-copy homozygote                 |
| 17460134        | 1.31               | 1                     | 13             | 2.17               | 1                                             | 13: single-copy homozygote                |
| 17460234        | 1.08               | 1                     | 1              | 1.99               | 1                                             | 1: single-copy homozygote                 |
| 17460256        | 0.70               | 1                     | 15             | 2.02               | 1                                             | 15: single-copy homozygote                |
| 17460278        | 1.20               | 1                     | 1              | 1.86               | 1                                             | 1: single-copy homozygote                 |
| 17461059        | 1.16               | 1                     | 1              | 2.09               | 1                                             | 1: single-copy homozygote                 |
| 17461111        | 1.05               | 1                     | 9              | 1.95               | 1                                             | 9: single-copy homozygote                 |
| 17470240        | 1.31               | 1                     | 7              | 2.03               | 1                                             | 7: single-copy homozygote                 |
| 17470347        | 1.29               | 1                     | 5              | 2.16               | 1                                             | 5: single-copy homozygote                 |
| 17470405        | 1.18               | 1                     | 3              | 2.06               | 1                                             | 3: single-copy homozygote                 |
| 17470476        | 1.21               | 1                     | 7              | 1.99               | 1                                             | 7: single-copy homozygote                 |
| 17470511        | 1.18               | 1                     | 16             | 1.91               | 1                                             | 16: single-copy homozygote                |

| Transgenic Line | T <sub>0</sub>     |                       | T <sub>1</sub> |                    |                                               | T <sub>2</sub>                            |
|-----------------|--------------------|-----------------------|----------------|--------------------|-----------------------------------------------|-------------------------------------------|
|                 | Ratio (target/ref) | Estimated Copy Number | Homozygote No. | Ratio (target/ref) | Estimated Copy Number of T <sub>0</sub> Plant | Verification of T <sub>1</sub> Homozygote |
| 17470721        | 1.18               | 1                     | 8              | 1.95               | 1                                             | 8: single-copy homozygote                 |
| 17471045        | 1.19               | 1                     | 5              | 1.90               | 1                                             | 5: single-copy homozygote                 |
| 17471110        | 1.01               | 1                     | 10             | 1.74               | 1                                             | 10: single-copy homozygote                |
| 17471240        | 1.17               | 1                     | 10             | 1.96               | 1                                             | 10: single-copy homozygote                |
| 17480307        | 1.27               | 1                     | 11             | 2.00               | 1                                             | 11: single-copy homozygote                |
| 17480480        | 0.97               | 1                     | 18             | 1.94               | 1                                             | 18: single-copy homozygote                |
| 17480527        | 0.99               | 1                     | 3              | 2.11               | 1                                             | 3: single-copy homozygote                 |
| 17480670        | 0.52               | 1                     | 2              | 1.97               | 1                                             | 2: single-copy homozygote                 |
| 17480672        | 1.23               | 1                     | 12             | 1.99               | 1                                             | 12: single-copy homozygote                |
| 17480748        | 1.08               | 1                     | 9              | 1.83               | 1                                             | 9: single-copy homozygote                 |
| 17480765        | 1.15               | 1                     | 14             | 2.05               | 1                                             | 14: single-copy homozygote                |
| 17480965        | 1.12               | 1                     | 4              | 1.89               | 1                                             | 4: single-copy homozygote                 |
| 17490081        | 1.24               | 1                     | 24             | 1.97               | 1                                             | 24: single-copy homozygote                |
| 17490086        | 1.30               | 1                     | 11             | 1.88               | 1                                             | 11: single-copy homozygote                |
| 17490105        | 0.68               | 1                     | 17             | 1.88               | 1                                             | 17: single-copy homozygote                |
| 17490123        | 1.21               | 1                     | 14             | 1.95               | 1                                             | 14: single-copy homozygote                |
| 17490217        | 1.36               | 1                     | 5              | 1.88               | 1                                             | 5: single-copy homozygote                 |
| 17490353        | 1.13               | 1                     | 4              | 2.00               | 1                                             | 4: single-copy homozygote                 |
| 17490404        | 1.38               | 1                     | 18             | 2.03               | 1                                             | 18: single-copy homozygote                |
| 17490475        | 1.23               | 1                     | 13             | 2.01               | 1                                             | 13: single-copy homozygote                |

| Transgenic Line | T <sub>0</sub>     |                       | T <sub>1</sub> |                    |                                               | T <sub>2</sub>                            |
|-----------------|--------------------|-----------------------|----------------|--------------------|-----------------------------------------------|-------------------------------------------|
|                 | Ratio (target/ref) | Estimated Copy Number | Homozygote No. | Ratio (target/ref) | Estimated Copy Number of T <sub>0</sub> Plant | Verification of T <sub>1</sub> Homozygote |
| 17490496        | 1.28               | 1                     | 9              | 2.01               | 1                                             | 9: single-copy homozygote                 |
| 17490513        | 1.00               | 1                     | 11             | 2.01               | 1                                             | 11: single-copy homozygote                |
| 17490706        | 1.29               | 1                     | 21             | 1.97               | 1                                             | 21: single-copy homozygote                |
| 17491055        | 1.35               | 1                     | 3              | 2.54               | 1                                             | 3: single-copy homozygote                 |
| 17491085        | 1.33               | 1                     | 10             | 2.01               | 1                                             | 10: single-copy homozygote                |
| 17500025        | 1.39               | 1                     | 22             | 1.99               | 1                                             | 22: single-copy homozygote                |
| 17500069        | 1.20               | 1                     | 11             | 1.92               | 1                                             | 11: single-copy homozygote                |
| 17500125        | 1.11               | 1                     | 5              | 1.94               | 1                                             | 5: single-copy homozygote                 |
| 17500200        | 1.26               | 1                     | 10             | 2.02               | 1                                             | 10: single-copy homozygote                |
| 17500615        | 1.19               | 1                     | 10             | 2.38               | 1                                             | 10: single-copy homozygote                |
| 17500661        | 0.92               | 1                     | 4              | 2.30               | 1                                             | 4: single-copy homozygote                 |
| 17500729        | 1.30               | 1                     | 3              | 2.20               | 1                                             | 3: single-copy homozygote                 |
| 17500975        | 1.02               | 1                     | 5              | 1.83               | 1                                             | 5: single-copy homozygote                 |
| 17500989        | 1.15               | 1                     | 10             | 1.98               | 1                                             | 10: single-copy homozygote                |
| 17501482        | 0.76               | 1                     | 8              | 1.79               | 1                                             | 8: single-copy homozygote                 |
| 18010007        | 1.24               | 1                     | 19             | 1.90               | 1                                             | 19: single-copy homozygote                |
| 18010241        | 1.22               | 1                     | 6              | 1.92               | 1                                             | 6: single-copy homozygote                 |
| 18010347        | 1.18               | 1                     | 7              | 2.08               | 1                                             | 7: single-copy homozygote                 |
| 18010406        | 1.32               | 1                     | 7              | 1.99               | 1                                             | 7: single-copy homozygote                 |
| 18010410        | 0.99               | 1                     | 15             | 1.91               | 1                                             | 15: single-copy homozygote                |

| Transgenic Line | T <sub>0</sub>     |                       | T <sub>1</sub> |                    |                                               | T <sub>2</sub>                            |
|-----------------|--------------------|-----------------------|----------------|--------------------|-----------------------------------------------|-------------------------------------------|
|                 | Ratio (target/ref) | Estimated Copy Number | Homozygote No. | Ratio (target/ref) | Estimated Copy Number of T <sub>0</sub> Plant | Verification of T <sub>1</sub> Homozygote |
| 18010481        | 1.17               | 1                     | 3              | 1.94               | 1                                             | 3: single-copy homozygote                 |
| 18010543        | 1.20               | 1                     | 8              | 1.99               | 1                                             | 8: single-copy homozygote                 |
| 18010633        | 0.88               | 1                     | 1              | 1.85               | 1                                             | 1: single-copy homozygote                 |
| 18010773        | 1.23               | 1                     | 4              | 2.01               | 1                                             | 4: single-copy homozygote                 |
| 18011205        | 1.27               | 1                     | 1              | 2.12               | 1                                             | 1: single-copy homozygote                 |
| 18020222        | 0.97               | 1                     | 3              | 1.97               | 1                                             | 3: single-copy homozygote                 |
| 18020670        | 1.31               | 1                     | 9              | 1.81               | 1                                             | 9: single-copy homozygote                 |
| 18020867        | 1.17               | 1                     | 17             | 2.10               | 1                                             | 17: single-copy homozygote                |
| 18020891        | 1.18               | 1                     | 4              | 2.02               | 1                                             | 4: single-copy homozygote                 |
| 18021464        | 1.17               | 1                     | 12             | 2.18               | 1                                             | 12: single-copy homozygote                |
| 18010249        | 1.17               | 1                     | 10             | 2.22               | 1                                             | 10: single-copy homozygote                |
| 18020067        | 1.08               | 1                     | 11             | 1.95               | 1                                             | 11: single-copy homozygote                |
| 18020196        | 1.25               | 1                     | 5              | 1.99               | 1                                             | 5: single-copy homozygote                 |
| 18020604        | 1.11               | 1                     | 14             | 1.92               | 1                                             | 14: single-copy homozygote                |
| 18021495        | 0.60               | 1                     | 8              | 1.89               | 1                                             | 8: single-copy homozygote                 |
| 18030274        | 1.26               | 1                     | 6              | 1.83               | 1                                             | 6: single-copy homozygote                 |
| 18030512        | 1.37               | 1                     | 5              | 1.97               | 1                                             | 5: single-copy homozygote                 |
| 18030888        | 1.20               | 1                     | 14             | 1.98               | 1                                             | 14: single-copy homozygote                |
| 18030889        | 1.33               | 1                     | 1              | 1.97               | 1                                             | 1: single-copy homozygote                 |
| 18030899        | 1.15               | 1                     | 1              | 2.03               | 1                                             | 1: single-copy homozygote                 |

| Transgenic Line | T <sub>0</sub>     |                       | T <sub>1</sub> |                    |                                               | T <sub>2</sub>                            |
|-----------------|--------------------|-----------------------|----------------|--------------------|-----------------------------------------------|-------------------------------------------|
|                 | Ratio (target/ref) | Estimated Copy Number | Homozygote No. | Ratio (target/ref) | Estimated Copy Number of T <sub>0</sub> Plant | Verification of T <sub>1</sub> Homozygote |
| 18040628        | 1.17               | 1                     | 2              | 1.80               | 1                                             | 2: single-copy homozygote                 |
| 18041265        | 1.08               | 1                     | 17             | 2.09               | 1                                             | 17: single-copy homozygote                |
| 18041332        | 1.06               | 1                     | 5              | 2.02               | 1                                             | 5: single-copy homozygote                 |
| 18041422        | 0.95               | 1                     | 11             | 1.92               | 1                                             | 11: single-copy homozygote                |
| 18041948        | 1.11               | 1                     | 1              | 1.94               | 1                                             | 1: single-copy homozygote                 |
| 18042665        | 0.97               | 1                     | 20             | 1.87               | 1                                             | 20: single-copy homozygote                |
| 18050215        | 1.16               | 1                     | 20             | 1.98               | 1                                             | 20: single-copy homozygote                |
| 18050321        | 1.23               | 1                     | 8              | 3.53               | 2                                             | 8: two-copy homozygote                    |
| 18050509        | 1.07               | 1                     | 7              | 2.00               | 1                                             | 7: single-copy homozygote                 |
| 18050873        | 1.25               | 1                     | 24             | 2.04               | 1                                             | 24: single-copy homozygote                |
| 18050884        | 1.04               | 1                     | 2              | 2.11               | 1                                             | 2: single-copy homozygote                 |
| 18050899        | 1.37               | 1                     | 2              | 1.93               | 1                                             | 2: single-copy homozygote                 |
| 18050912        | 1.32               | 1                     | 2              | 1.85               | 1                                             | 2: single-copy homozygote                 |
| 18050941        | 1.35               | 1                     | 4              | 1.96               | 1                                             | 4: single-copy homozygote                 |
| 18051818        | 1.00               | 1                     | 3              | 2.08               | 1                                             | 3: single-copy homozygote                 |
| 18060333        | 1.12               | 1                     | 6              | 1.88               | 1                                             | 6: single-copy homozygote                 |
| 18060398        | 1.04               | 1                     | 5              | 1.94               | 1                                             | 5: single-copy homozygote                 |
| 18060419        | 1.35               | 1                     | 9              | 1.80               | 1                                             | 9: single-copy homozygote                 |
| 18060471        | 1.33               | 1                     | 2              | 1.94               | 1                                             | 2: single-copy homozygote                 |
| 18060559        | 1.25               | 1                     | 2              | 1.86               | 1                                             | 2: single-copy homozygote                 |

| Transgenic Line | T <sub>0</sub>     |                       | T <sub>1</sub> |                    |                                               | T <sub>2</sub>                            |
|-----------------|--------------------|-----------------------|----------------|--------------------|-----------------------------------------------|-------------------------------------------|
|                 | Ratio (target/ref) | Estimated Copy Number | Homozygote No. | Ratio (target/ref) | Estimated Copy Number of T <sub>0</sub> Plant | Verification of T <sub>1</sub> Homozygote |
| 18061013        | 1.22               | 1                     | 8              | 1.82               | 1                                             | 8: single-copy homozygote                 |
| 18061145        | 0.90               | 1                     | 4              | 1.74               | 1                                             | 4: single-copy homozygote                 |
| 18061437        | 1.17               | 1                     | 4              | 2.26               | 1                                             | 4: single-copy homozygote                 |
| 18070013        | 1.27               | 1                     | 9              | 1.88               | 1                                             | 9: single-copy homozygote                 |
| 18070471        | 0.96               | 1                     | 2              | 1.98               | 1                                             | 2: single-copy homozygote                 |
| 18070484        | 1.27               | 1                     | 14             | 2.05               | 1                                             | 14: single-copy homozygote                |
| 18041874        | 1.22               | 1                     | 9              | 2.45               | 1                                             | 9: single-copy homozygote                 |
| 18050530        | 1.27               | 1                     | 1              | 1.94               | 1                                             | 1: single-copy homozygote                 |
| 18050542        | 1.12               | 1                     | 4              | 2.02               | 1                                             | 4: single-copy homozygote                 |
| 18061043        | 1.19               | 1                     | 2              | 2.21               | 1                                             | 2: single-copy homozygote                 |
| 18061171        | 0.86               | 1                     | 3              | 2.11               | 1                                             | 3: single-copy homozygote                 |
| 18080383        | 1.37               | 1                     | 3              | 2.19               | 1                                             | 3: single-copy homozygote                 |
| 18080416        | 1.28               | 1                     | 3              | 2.23               | 1                                             | 3: single-copy homozygote                 |
| 18080501        | 1.33               | 1                     | 3              | 2.57               | 1                                             | 3: single-copy homozygote                 |
| 18080585        | 1.07               | 1                     | 1              | 2.30               | 1                                             | 1: single-copy homozygote                 |
| 18080929        | 1.11               | 1                     | 4              | 2.21               | 1                                             | 4: single-copy homozygote                 |
| 18081416        | 1.12               | 1                     | 3              | 2.17               | 1                                             | 3: single-copy homozygote                 |
| 18090507        | 1.37               | 1                     | 7              | 2.15               | 1                                             | 7: single-copy homozygote                 |
| 18090640        | 1.03               | 1                     | 12             | 2.06               | 1                                             | 12: single-copy homozygote                |
| 18090641        | 0.99               | 1                     | 1              | 2.56               | 1                                             | 1: single-copy homozygote                 |

| Transgenic Line | T <sub>0</sub>     |                       | T <sub>1</sub> |                    |                                               | T <sub>2</sub>                            |
|-----------------|--------------------|-----------------------|----------------|--------------------|-----------------------------------------------|-------------------------------------------|
|                 | Ratio (target/ref) | Estimated Copy Number | Homozygote No. | Ratio (target/ref) | Estimated Copy Number of T <sub>0</sub> Plant | Verification of T <sub>1</sub> Homozygote |
| 18110355        | 1.15               | 1                     | 3              | 2.19               | 1                                             | 3: single-copy homozygote                 |
| 18110392        | 1.25               | 1                     | 7              | 2.52               | 1                                             | 7: single-copy homozygote                 |
| 18121011        | 1.16               | 1                     | 5              | 2.14               | 1                                             | 5: single-copy homozygote                 |
| 18121059        | 1.03               | 1                     | 1              | 2.13               | 1                                             | 1: single-copy homozygote                 |
| 18130207        | 1.23               | 1                     | 1              | 2.47               | 1                                             | 1: single-copy homozygote                 |
| 18140008        | 1.29               | 1                     | 3              | 2.05               | 1                                             | 3: single-copy homozygote                 |
| 18090305        | 1.31               | 1                     | 11             | 2.00               | 1                                             | 11: single-copy homozygote                |
| 18100448        | 1.37               | 1                     | 6              | 2.12               | 1                                             | 6: single-copy homozygote                 |
| 18100533        | 1.17               | 1                     | 12             | 1.98               | 1                                             | 12: single-copy homozygote                |
| 18110130        | 1.17               | 1                     | 10             | 1.96               | 1                                             | 10: single-copy homozygote                |
| 18130151        | 1.26               | 1                     | 2              | 1.87               | 1                                             | 2: single-copy homozygote                 |
| 18180208        | 1.12               | 1                     | 5              | 1.89               | 1                                             | 5: single-copy homozygote                 |
| 18180209        | 1.02               | 1                     | 15             | 1.95               | 1                                             | 15: single-copy homozygote                |
| 18180507        | 1.00               | 1                     | 2              | 1.72               | 1                                             | 2: single-copy homozygote                 |
| 18180516        | 1.13               | 1                     | 4              | 1.80               | 1                                             | 4: single-copy homozygote                 |
| 18180635        | 1.09               | 1                     | 5              | 2.00               | 1                                             | 5: single-copy homozygote                 |
| 18180719        | 1.25               | 1                     | 4              | 1.96               | 1                                             | 4: single-copy homozygote                 |
| 18182389        | 0.97               | 1                     | 1              | 2.00               | 1                                             | 1: single-copy homozygote                 |
| 18190337        | 1.22               | 1                     | 17             | 3.96               | 2                                             | 17: two-copy homozygote                   |
| 17430788        | 1.34               | 1                     | 3              | 2.01               | 1                                             | 3: single-copy homozygote                 |



| Transgenic Line | T <sub>0</sub>     |                       | T <sub>1</sub> |                    |                                               | T <sub>2</sub>                            |
|-----------------|--------------------|-----------------------|----------------|--------------------|-----------------------------------------------|-------------------------------------------|
|                 | Ratio (target/ref) | Estimated Copy Number | Homozygote No. | Ratio (target/ref) | Estimated Copy Number of T <sub>0</sub> Plant | Verification of T <sub>1</sub> Homozygote |
| 17480508        | 1.17               | 1                     | 4              | 1.99               | 1                                             | 4: single-copy homozygote                 |
| 17490097        | 1.04               | 1                     | 3              | 1.96               | 1                                             | 3: single-copy homozygote                 |
| 17490793        | 1.37               | 1                     | 10             | 1.90               | 1                                             | 10: single-copy homozygote                |
| 17500063        | 0.71               | 1                     | 5              | 1.97               | 1                                             | 5: single-copy homozygote                 |
| 18011178        | 0.97               | 1                     | 6              | 2.11               | 1                                             | 6: single-copy homozygote                 |
| 18011210        | 1.20               | 1                     | 2              | 1.91               | 1                                             | 2: single-copy homozygote                 |
| 17500659        | 1.29               | 1                     | 3              | 2.09               | 1                                             | 3: single-copy homozygote                 |
| 18020626        | 1.13               | 1                     | 15             | 1.92               | 1                                             | 15: single-copy homozygote                |
| 18021487        | 0.56               | 1                     | 14             | 1.97               | 1                                             | 14: single-copy homozygote                |
| 18041162        | 0.97               | 1                     | 7              | 1.98               | 1                                             | 7: single-copy homozygote                 |
| 18041318        | 1.37               | 1                     | 4              | 2.26               | 1                                             | 4: single-copy homozygote                 |
| 14320226        | 1.26               | 1                     | 7              | 2.09               | 1                                             | 7: single-copy homozygote                 |
| 14370681        | 1.05               | 1                     | 10             | 2.47               | 1                                             | 10: single-copy homozygote                |
| 15401247        | 1.33               | 1                     | 7              | 1.96               | 1                                             | 7: single-copy homozygote                 |
| 15471363        | 1.23               | 1                     | 15             | 1.99               | 1                                             | 15: single-copy homozygote                |
| 15490969        | 1.31               | 1                     | 9              | 1.94               | 1                                             | 9: single-copy homozygote                 |
| 16240468        | 1.29               | 1                     | 1              | 2.01               | 1                                             | 1: single-copy homozygote                 |
| 16270480        | 1.08               | 1                     | 1              | 1.82               | 1                                             | 1: single-copy homozygote                 |
| 16500265        | 1.34               | 1                     | 8              | 1.86               | 1                                             | 8: single-copy homozygote                 |
| 17010181        | 0.98               | 1                     | 1              | 1.83               | 1                                             | 1: single-copy homozygote                 |

| Transgenic Line | T <sub>0</sub>     |                       | T <sub>1</sub> |                    |                                               | T <sub>2</sub>                            |
|-----------------|--------------------|-----------------------|----------------|--------------------|-----------------------------------------------|-------------------------------------------|
|                 | Ratio (target/ref) | Estimated Copy Number | Homozygote No. | Ratio (target/ref) | Estimated Copy Number of T <sub>0</sub> Plant | Verification of T <sub>1</sub> Homozygote |
| 17010485        | 1.02               | 1                     | 1              | 1.85               | 1                                             | 1: single-copy homozygote                 |
| 17090047        | 0.70               | 1                     | 1              | 2.13               | 1                                             | 1: single-copy homozygote                 |
| 17090289        | 0.63               | 1                     | 7              | 2.06               | 1                                             | 7: single-copy homozygote                 |
| 17110112        | 1.10               | 1                     | 1              | 3.73               | 2                                             | 1: two-copy homozygote                    |
| 17140037        | 1.33               | 1                     | 4              | 2.07               | 1                                             | 4: single-copy homozygote                 |
| 17180144        | 0.87               | 1                     | 5              | 1.64               | 1                                             | 5: single-copy homozygote                 |
| 17190236        | 1.14               | 1                     | 6              | 2.36               | 1                                             | 6: single-copy homozygote                 |
| 17220798        | 1.24               | 1                     | 8              | 2.05               | 1                                             | 8: single-copy homozygote                 |
| 17290129        | 1.07               | 1                     | 17             | 1.96               | 1                                             | 17: single-copy homozygote                |
| 17290290        | 1.26               | 1                     | 3              | 2.05               | 1                                             | 3: single-copy homozygote                 |
| 17290443        | 0.99               | 1                     | 3              | 1.80               | 1                                             | 3: single-copy homozygote                 |
| 17290852        | 1.26               | 1                     | 1              | 2.07               | 1                                             | 1: single-copy homozygote                 |
| 17310358        | 1.30               | 1                     | 4              | 2.01               | 1                                             | 4: single-copy homozygote                 |
| 17310506        | 1.28               | 1                     | 9              | 1.99               | 1                                             | 9: single-copy homozygote                 |
| 17310875        | 1.00               | 1                     | 3              | 1.88               | 1                                             | 3: single-copy homozygote                 |
| 17340835        | 1.08               | 1                     | 7              | 2.04               | 1                                             | 7: single-copy homozygote                 |
| 17340926        | 1.35               | 1                     | 11             | 2.07               | 1                                             | 11: single-copy homozygote                |
| 17350792        | 1.25               | 1                     | 1              | 2.02               | 1                                             | 1: single-copy homozygote                 |
| 17360850        | 1.06               | 1                     | 2              | 1.98               | 1                                             | 2: single-copy homozygote                 |
| 17370784        | 0.71               | 1                     | 2              | 1.88               | 1                                             | 2: single-copy homozygote                 |

| Transgenic Line | T <sub>0</sub>     |                       | T <sub>1</sub> |                    |                                               | T <sub>2</sub>                            |
|-----------------|--------------------|-----------------------|----------------|--------------------|-----------------------------------------------|-------------------------------------------|
|                 | Ratio (target/ref) | Estimated Copy Number | Homozygote No. | Ratio (target/ref) | Estimated Copy Number of T <sub>0</sub> Plant | Verification of T <sub>1</sub> Homozygote |
| 17380252        | 1.09               | 1                     | 5              | 1.99               | 1                                             | 5: single-copy homozygote                 |
| 17400333        | 1.22               | 1                     | 2              | 2.03               | 1                                             | 2: single-copy homozygote                 |
| 17400429        | 1.29               | 1                     | 17             | 2.05               | 1                                             | 17: single-copy homozygote                |
| 17400509        | 1.39               | 1                     | 6              | 2.11               | 1                                             | 6: single-copy homozygote                 |
| 17400527        | 1.29               | 1                     | 7              | 2.02               | 1                                             | 7: single-copy homozygote                 |
| 17401002        | 1.25               | 1                     | 15             | 1.83               | 1                                             | 15: single-copy homozygote                |
| 17401023        | 1.14               | 1                     | 4              | 2.00               | 1                                             | 4: single-copy homozygote                 |
| 17421090        | 1.18               | 1                     | 6              | 1.99               | 1                                             | 6: single-copy homozygote                 |
| 17421134        | 1.17               | 1                     | 8              | 2.21               | 1                                             | 8: single-copy homozygote                 |
| 17430466        | 1.30               | 1                     | 10             | 2.00               | 1                                             | 10: single-copy homozygote                |
| 16230559        | 0.76               | 1                     | 1              | 1.98               | 1                                             | 1: single-copy homozygote                 |
| 16250196        | 0.77               | 1                     | 13             | 1.82               | 1                                             | 13: single-copy homozygote                |
| 17030095        | 1.08               | 1                     | 8              | 2.47               | 1                                             | 8: single-copy homozygote                 |
| 17100037        | 0.93               | 1                     | 1              | 2.09               | 1                                             | 1: single-copy homozygote                 |
| 17140511        | 1.11               | 1                     | 15             | 2.00               | 1                                             | 15: single-copy homozygote                |
| 17150626        | 1.03               | 1                     | 2              | 2.21               | 1                                             | 2: single-copy homozygote                 |
| 17160339        | 0.85               | 1                     | 3              | 1.93               | 1                                             | 3: single-copy homozygote                 |
| 15300500        | 1.38               | 1                     | 5              | 2.06               | 1                                             | 5: single-copy homozygote                 |
| 15340546        | 1.18               | 1                     | 12             | 1.94               | 1                                             | 12: single-copy homozygote                |
| 15360728        | 1.21               | 1                     | 2              | 1.81               | 1                                             | 2: single-copy homozygote                 |

| Transgenic Line | T <sub>0</sub>     |                       | T <sub>1</sub> |                    |                                               | T <sub>2</sub>                            |
|-----------------|--------------------|-----------------------|----------------|--------------------|-----------------------------------------------|-------------------------------------------|
|                 | Ratio (target/ref) | Estimated Copy Number | Homozygote No. | Ratio (target/ref) | Estimated Copy Number of T <sub>0</sub> Plant | Verification of T <sub>1</sub> Homozygote |
| 16100054        | 1.03               | 1                     | 13             | 2.02               | 1                                             | 13: single-copy homozygote                |
| 16120366        | 0.81               | 1                     | 6              | 2.14               | 1                                             | 6: single-copy homozygote                 |
| 16141400        | 1.24               | 1                     | 7              | 2.00               | 1                                             | 7: single-copy homozygote                 |
| 16160178        | 1.11               | 1                     | 7              | 1.95               | 1                                             | 7: single-copy homozygote                 |
| 16170523        | 1.00               | 1                     | 5              | 1.84               | 1                                             | 5: single-copy homozygote                 |
| 16180541        | 1.22               | 1                     | 2              | 2.30               | 1                                             | 2: single-copy homozygote                 |
| 16250034        | 1.33               | 1                     | 9              | 1.97               | 1                                             | 9: single-copy homozygote                 |
| 16260278        | 0.76               | 1                     | 11             | 1.99               | 1                                             | 11: single-copy homozygote                |
| 16340156        | 1.18               | 1                     | 4              | 2.04               | 1                                             | 4: single-copy homozygote                 |
| 17020324        | 0.95               | 1                     | 4              | 2.03               | 1                                             | 4: single-copy homozygote                 |
| 17030087        | 1.13               | 1                     | 8              | 2.01               | 1                                             | 8: single-copy homozygote                 |
| 17090038        | 1.27               | 1                     | 5              | 2.01               | 1                                             | 5: single-copy homozygote                 |
| 17200281        | 1.27               | 1                     | 8              | 2.18               | 1                                             | 8: single-copy homozygote                 |
| 17220175        | 1.10               | 1                     | 7              | 2.00               | 1                                             | 7: single-copy homozygote                 |
| 17220794        | 1.27               | 1                     | 6              | 2.02               | 1                                             | 6: single-copy homozygote                 |
| 17230491        | 1.03               | 1                     | 6              | 1.95               | 1                                             | 6: single-copy homozygote                 |
| 17251058        | 1.19               | 1                     | 6              | 2.01               | 1                                             | 6: single-copy homozygote                 |
| 17280267        | 1.04               | 1                     | 1              | 3.83               | 2                                             | 1: two-copy homozygote                    |
| 17290299        | 1.05               | 1                     | 1              | 1.98               | 1                                             | 1: single-copy homozygote                 |
| 17310254        | 1.25               | 1                     | 11             | 1.98               | 1                                             | 11: single-copy homozygote                |

| Transgenic Line | T <sub>0</sub>     |                       | T <sub>1</sub> |                    |                                               | T <sub>2</sub>                            |
|-----------------|--------------------|-----------------------|----------------|--------------------|-----------------------------------------------|-------------------------------------------|
|                 | Ratio (target/ref) | Estimated Copy Number | Homozygote No. | Ratio (target/ref) | Estimated Copy Number of T <sub>0</sub> Plant | Verification of T <sub>1</sub> Homozygote |
| 17310274        | 1.07               | 1                     | 4              | 2.12               | 1                                             | 4: single-copy homozygote                 |
| 17320030        | 0.91               | 1                     | 5              | 1.98               | 1                                             | 5: single-copy homozygote                 |
| 17320580        | 1.04               | 1                     | 2              | 1.91               | 1                                             | 2: single-copy homozygote                 |
| 17321092        | 0.56               | 1                     | 4              | 3.86               | 2                                             | 4: two-copy homozygote                    |
| 17360198        | 1.30               | 1                     | 4              | 2.13               | 1                                             | 4: single-copy homozygote                 |
| 17371180        | 1.21               | 1                     | 1              | 2.01               | 1                                             | 1: single-copy homozygote                 |
| 17391261        | 1.20               | 1                     | 11             | 2.04               | 1                                             | 11: single-copy homozygote                |
| 17391523        | 1.16               | 1                     | 2              | 2.06               | 1                                             | 2: single-copy homozygote                 |
| 17320449        | 1.02               | 1                     | 10             | 1.98               | 1                                             | 10: single-copy homozygote                |
| 17430284        | 0.81               | 1                     | 2              | 2.06               | 1                                             | 2: single-copy homozygote                 |
| 17430595        | 1.20               | 1                     | 3              | 2.29               | 1                                             | 3: single-copy homozygote                 |
| 17430755        | 1.11               | 1                     | 3              | 1.99               | 1                                             | 3: single-copy homozygote                 |
| 17440273        | 1.24               | 1                     | 1              | 2.17               | 1                                             | 1: single-copy homozygote                 |
| 16140128        | 1.16               | 1                     | 3              | 2.07               | 1                                             | 3: single-copy homozygote                 |
| 15300670        | 1.31               | 1                     | 13             | 1.92               | 1                                             | 13: single-copy homozygote                |
| 16100075        | 1.02               | 1                     | 3              | 2.01               | 1                                             | 3: single-copy homozygote                 |
| 16110103        | 1.35               | 1                     | 5              | 2.03               | 1                                             | 5: single-copy homozygote                 |

Notes: target, transgene *bar*; ref, endogenous gene *hmg*.
